# Supplementary material for: Unravelling the potential of low-valent tunable vanadium complexes in the nitrogen reduction reaction (NRR)
Source: Royal Society of Chemistry journal article supplement (doi:10.1039/d4dt02217c), 2024-01-01
Supplement: d4dt02217c1.pdf [file d4dt02217c1.pdf]

# Electronic Supplementary Information (ESI†)

## Unravelling the Potential of Low-Valent Tunable Vanadium

### Complexes in Nitrogen Reduction Reaction (NRR)

Bijoy Ghosh, Sahtaz Ahmed and Ashwini K. Phukan\*

Department of Chemical Sciences, Tezpur University, Napaam 784028, Assam, India

E-Mail: [ashwini@tezu.ernet.in](mailto:ashwini@tezu.ernet.in)

## Table of content

|                  |                                                                                                                                                                                                                                                                                                                                                                                                                                                                                                                                                                                                                                                                                                                       |    |
|------------------|-----------------------------------------------------------------------------------------------------------------------------------------------------------------------------------------------------------------------------------------------------------------------------------------------------------------------------------------------------------------------------------------------------------------------------------------------------------------------------------------------------------------------------------------------------------------------------------------------------------------------------------------------------------------------------------------------------------------------|----|
| <b>Table S1</b>  | Calculated (M06-L-D3(heptane)/6-311+G*) important geometrical parameters, natural charges and pyramidalization angle (in degree) at the metal ( $\theta_V$ ) and apical ( $\theta_X$ , X = B, C and Si) center for the Schrock complex ( $\{[\text{HIPTN}_3\text{N}]\text{-V}\}$ ) and model vanadium complexes considered in this study. Also, given are the energies (in eV) of the donor ( $E_{\text{HOMO}}$ ), acceptor ( $E_{\text{LUMO}}$ ) orbitals (centered at the transition metal center) of the parent vanadium complexes $[\mathbf{1a}'_{\text{PC}}]\text{-}[\mathbf{1f}'_{\text{SB}}]$ , $[\mathbf{1a}''_{\text{PC}}]\text{-}[\mathbf{1f}''_{\text{SB}}]$ and $\{[\text{HIPTN}_3\text{N}]\text{-V}\}$ . | 7  |
| <b>Table S2</b>  | Calculated total energies (in hartree) of the model vanadium complexes ( $[\mathbf{1a}'_{\text{PC}}]\text{-}[\mathbf{1f}'_{\text{SB}}]$ and $[\mathbf{1a}''_{\text{PC}}]\text{-}[\mathbf{1f}''_{\text{SB}}]$ ) and Schrock's vanadium complex ( $\{[\text{HIPTN}_3\text{N}]\text{-V}\}$ ) in different spin states at M06-L-D3(heptane)/6-311+G* level of theory.                                                                                                                                                                                                                                                                                                                                                     | 8  |
| <b>Table S3</b>  | Difference between the ideal spin and calculated spin (spin contamination) of the parent complexes in their different spin states at M06-L-D3(heptane)/6-311+G* level of theory.                                                                                                                                                                                                                                                                                                                                                                                                                                                                                                                                      | 9  |
| <b>Table S4</b>  | Calculated total energies (in hartree) of the dinitrogen-vanadium complexes ( $[\mathbf{2a}'_{\text{PC}}]\text{-}[\mathbf{2f}'_{\text{SB}}]$ , $[\mathbf{2a}''_{\text{PC}}]\text{-}[\mathbf{2f}''_{\text{SB}}]$ and $\{[\text{HIPTN}_3\text{N}]\text{-V-N}_2\}$ ) in different spin states at M06-L-D3(heptane)/6-311+G* level of theory.                                                                                                                                                                                                                                                                                                                                                                             | 10 |
| <b>Table S5</b>  | Calculated (M06-L-D3(heptane)/6-311+G*) important geometrical parameters and natural charge at the metal (V) and $\alpha$ ( $q_{\text{N}\alpha}$ ) and $\beta$ ( $q_{\text{N}\beta}$ ) nitrogen atoms of the dinitrogen complexes of Schrock complex and model vanadium complexes considered in this study.                                                                                                                                                                                                                                                                                                                                                                                                           | 11 |
| <b>Table S6</b>  | Difference between the ideal spin and calculated spin (spin contamination) of the dinitrogen vanadium complexes in their different spin states at M06-L-D3(heptane)/6-311+G* level of theory.                                                                                                                                                                                                                                                                                                                                                                                                                                                                                                                         | 12 |
| <b>Table S7</b>  | Calculated relative energy difference (in kcal mol <sup>-1</sup> ) between the possible spin states of the complexes $[\mathbf{1d}'_{\text{SC}}]\text{-}[\mathbf{1f}'_{\text{SB}}]$ and $[\mathbf{2d}'_{\text{SC}}]\text{-}[\mathbf{2f}'_{\text{SB}}]$ at B3PW91, PBE0 and M06-L level of theory. The total energies (TE) are in hartrees and relative energy difference values are given in kcal mol <sup>-1</sup> .                                                                                                                                                                                                                                                                                                 | 13 |
| <b>Table S8</b>  | Calculated reaction free energies ( $\Delta G$ , in kcal mol <sup>-1</sup> ) associated with the formation of the diazenido complex via the PCET pathway for our proposed complexes.                                                                                                                                                                                                                                                                                                                                                                                                                                                                                                                                  | 14 |
| <b>Table S9</b>  | Calculated total energies (in hartree) of the complex <b>[3]</b> in different spin states at M06-L-D3(heptane)/6-311+G* level of theory.                                                                                                                                                                                                                                                                                                                                                                                                                                                                                                                                                                              | 14 |
| <b>Table S10</b> | Calculated reaction free energies for the protonation of the equatorial sulphur and nitrogen atom, metal center and distal nitrogen atom of                                                                                                                                                                                                                                                                                                                                                                                                                                                                                                                                                                           | 15 |

the dinitrogen complexes  $[2a'_{PC}]-[2f'_{SB}]$ ,  $[2a''_{PC}]-[2f''_{SB}]$  and  $\{[HIPTN_3N]-V\}$ .

|                  |                                                                                                                                                                                                                                                                                                                                                                                                                                 |    |
|------------------|---------------------------------------------------------------------------------------------------------------------------------------------------------------------------------------------------------------------------------------------------------------------------------------------------------------------------------------------------------------------------------------------------------------------------------|----|
| <b>Table S11</b> | Calculated activation energy barrier (in kcal mol <sup>-1</sup> ) for the transition states <b>TS1</b> and <b>TS2</b> and reaction free energy (in kcal mol <sup>-1</sup> ) for the formation of the intermediate involved in the formation of the <b>[3]</b> from the metal protonated vanadium complexes <b>[3-V-H]<sup>+</sup></b> . The reaction free energies were evaluated with respect to the metal protonated species. | 16 |
| <b>Table S12</b> | Calculated (M06-L-D3(heptane)/6-311+G*) important geometrical parameters and natural charge at the metal (V) and $\alpha$ ( $q_{N\alpha}$ ) and $\beta$ ( $q_{N\beta}$ ) nitrogen atoms of for the diazenido complex ( <b>[4]</b> ) of the Schrock complex and model vanadium complexes considered in this study. Bond lengths are given in Å and WBI values are given within parenthesis.                                      | 17 |
| <b>Table S13</b> | Calculated total energies (in hartree) of the diazenido-vanadium complexes in different spin states at M06-L-D3/6-311+G*(heptane) level of theory.                                                                                                                                                                                                                                                                              | 18 |
| <b>Table S14</b> | Reaction free energies ( $\Delta G$ , in kcal mol <sup>-1</sup> ) obtained for the formation of the vanadium nitride complexes from the diazenido complexes <b>[4]</b> .                                                                                                                                                                                                                                                        | 19 |
| <b>Table S15</b> | Calculated (M06-L-D3(heptane)/6-311+G*) important geometrical parameters for the vanadium-nitride complex ( <b>[8]<sub>dis</sub></b> ) of <b>[1a'_{PC}]-[1f'_{SB}]</b> and <b>[1a''_{PC}]-[1f''_{SB}]</b> . Bond lengths are given in Å and WBI values are given within parenthesis.                                                                                                                                            | 19 |
| <b>Table S16</b> | Reaction free energies ( $\Delta G$ , in kcal mol <sup>-1</sup> ) obtained for the release of hydrazine from the vanadium-hydrazine complex of the proposed vanadium complexes and Schrock's vanadium complex ( $\{[HIPTN_3N]-V\}$ ).                                                                                                                                                                                           | 20 |
| <b>Table S17</b> | Calculated (M06-L-D3(heptane)/6-311+G*) important geometrical parameters and pyramidalization angle (in degree) around the vanadium center of <b>[5c''_{PB}]-[14c''_{PB}]</b> . Bond lengths are given in Å and WBI values are given within parenthesis.                                                                                                                                                                        | 21 |
| <b>Table S18</b> | Calculated (M06-L-D3(heptane)/6-311+G*) reaction free energies (in kcal mol <sup>-1</sup> ) for the protonation at the equatorial sulphur atom of the vanadium complex <b>[1f''_{SB}]</b> at different stages of dinitrogen reduction process.                                                                                                                                                                                  | 22 |
| <b>Table S19</b> | Calculated (M06-L-D3(heptane)/6-311+G*) important geometrical parameters and pyramidalization angle (in degree) around the vanadium center of <b>[5f''_{SB}]-[14f''_{SB}]</b> . Bond lengths are in Å. Bond                                                                                                                                                                                                                     | 23 |

|                  |                                                                                                                                                                                                                                                                                                            |       |
|------------------|------------------------------------------------------------------------------------------------------------------------------------------------------------------------------------------------------------------------------------------------------------------------------------------------------------|-------|
|                  | lengths are given in Å and WBI values are given within parenthesis.                                                                                                                                                                                                                                        |       |
| <b>Table S20</b> | Energies (in hartree) of the complexes $[5c''_{PB}]-[14c''_{PB}]$ and $[5f''_{SB}]-[14f''_{SB}]$ in their different multiplicities at (M06-L-D3(heptane)/6-311+G*) level of theory.                                                                                                                        | 24-25 |
| <b>Table S21</b> | Difference between the ideal spin and calculated spin (spin contamination) of the parent complexes in their different spin states at (M06-L-D3(heptane)/6-311+G*) level of theory.                                                                                                                         | 26-29 |
| <b>Fig. S1</b>   | Comparison of (a) the available X-ray data and our calculated (M06-L-D3(heptane)/6-311+G*) values of the important geometrical parameters (Bond lengths are given in Å) and (b) the available IR frequencies (in $\text{cm}^{-1}$ ) of some of the important bonds for the experimentally known complexes. | 29    |
| <b>Fig. S2</b>   | Optimized geometry of a representative vanadium complex ( $E = \text{P}^i\text{Pr}_2$ and $X = \text{Si}$ ) in two different orientations: (a) side view and (b) top view.                                                                                                                                 | 30    |
| <b>Fig. S3</b>   | Pictorial representation of the molecular orbital showing the lone pairs situated at the sulphur atoms of the dinitrogen vanadium complexes $[2a'_{PC}]-[2f'_{SB}]$ and $[2a''_{PC}]-[2f''_{SB}]$ .                                                                                                        | 30    |
| <b>Fig. S4</b>   | Pictorial representation of the HOMO for the dinitrogen vanadium complexes $[2a'_{PC}]-[2f'_{SB}]$ and $[2a''_{PC}]-[2f''_{SB}]$ .                                                                                                                                                                         | 31    |
| <b>Fig. S5</b>   | Optimized geometries of the transition state (TS1) involved in the formation of the $\eta^2$ -intermediate from the metal protonated species $[3-V-H]^+$ for $[1a'_{PC}]-[1f'_{SB}]$ at M06-L-D3(heptane)/6-311+G* level of theory.                                                                        | 32    |
| <b>Fig. S6</b>   | Optimized geometries of the $\eta^2$ -intermediate involved in the formation of <b>[3]</b> from the metal protonated species $[3-V-H]^+$ for $[1a'_{PC}]-[1f'_{SB}]$ at M06-L-D3(heptane)/6-311+G* level of theory.                                                                                        | 33    |
| <b>Fig. S7</b>   | Optimized geometries of the transition state (TS2) involved in the formation of <b>[3]</b> from the $\eta^2$ -intermediate of $[1a'_{PC}]-[1f'_{SB}]$ at M06-L-D3(heptane)/6-311+G* level of theory.                                                                                                       | 34    |
| <b>Fig. S8</b>   | Optimized geometries of the transition state (TS1) involved in the formation of the $\eta^2$ -intermediate from the metal protonated species $[3-V-H]^+$ of $[1a''_{PC}]-[1f''_{SB}]$ at M06-L-D3(heptane)/6-311+G* level of theory.                                                                       | 35    |
| <b>Fig. S9</b>   | Optimized geometries of the $\eta^2$ -intermediate involved in the formation of <b>[3]</b> from the metal protonated species $[3-V-H]^+$ of $[1a''_{PC}]-[1f''_{SB}]$ at M06-L-D3(heptane)/6-311+G* level of theory.                                                                                       | 36    |

|                 |                                                                                                                                                                                                                                                                                                                                                                                                                                                                     |    |
|-----------------|---------------------------------------------------------------------------------------------------------------------------------------------------------------------------------------------------------------------------------------------------------------------------------------------------------------------------------------------------------------------------------------------------------------------------------------------------------------------|----|
| <b>Fig. S10</b> | Optimized geometries of the transition state (TS2) involved in the formation of the $\eta^2$ -intermediate from the metal protonated species [3-V-H] <sup>+</sup> of [1a'' <sub>PC</sub> ]-[1f'' <sub>SB</sub> ] at M06-L-D3(heptane)/6-311+G* level of theory.                                                                                                                                                                                                     | 37 |
| <b>Fig. S11</b> | Optimized geometries of the TS (TS3) involved during conversion of [4]→[5] <sub>alt</sub> in all possible spin states for the molecules (a) [1c'' <sub>PB</sub> ] and (b) [1f'' <sub>SB</sub> ] at M06-L-D3(heptane)/6-311+G* level of theory.                                                                                                                                                                                                                      | 38 |
| <b>Fig. S12</b> | Schematic representation of the possible proton-catalyzed pathways involved in the conversion of [5] <sub>alt</sub> , [6] <sub>alt</sub> and [7] <sub>alt</sub> to [5] <sub>dis</sub> , [6] <sub>dis</sub> and [7] <sub>dis</sub> , respectively.                                                                                                                                                                                                                   | 39 |
| <b>Fig. S13</b> | Optimized geometries of the TSs involved in the conversion of [5c'' <sub>PB</sub> ] <sub>alt</sub> , [6c'' <sub>PB</sub> ] <sub>alt</sub> and [7c'' <sub>PB</sub> ] <sub>alt</sub> to [5c'' <sub>PB</sub> ] <sub>dis</sub> , [6c'' <sub>PB</sub> ] <sub>dis</sub> and [7c'' <sub>PB</sub> ] <sub>dis</sub> respectively via proton transfer pathway at M06-L-D3(heptane)/6-311+G* level of theory. The hydrogen atoms of the methyl groups are omitted for clarity. | 40 |
| <b>Fig. S14</b> | Optimized geometries of the TS (TS5) involved during conversion of [5] <sub>alt</sub> →[5] <sub>dis</sub> in all possible spin states for the molecules (a) [1c'' <sub>PB</sub> ] and (b) [1f'' <sub>SB</sub> ] at M06-L-D3(heptane)/6-311+G* level of theory.                                                                                                                                                                                                      | 41 |
| <b>Fig. S15</b> | Optimized geometries of the TS (TS6) involved during conversion of [6] <sub>alt</sub> →[6] <sub>dis</sub> in all possible spin states for the molecules (a) [1c'' <sub>PB</sub> ] and (b) [1f'' <sub>SB</sub> ] at M06-L-D3(heptane)/6-311+G* level of theory.                                                                                                                                                                                                      | 42 |
| <b>Fig. S16</b> | Optimized geometries of the TS (TS7) involved during conversion of [7] <sub>alt</sub> →[7] <sub>dis</sub> in all possible spin states for the molecules (a) [1c'' <sub>PB</sub> ] and (b) [1f'' <sub>SB</sub> ] at M06-L-D3(heptane)/6-311+G* level of theory.                                                                                                                                                                                                      | 43 |
| <b>Fig. S17</b> | Molecular orbital showing the presence of amino lone pair on the $\beta$ -nitrogen atom of the complexes [10c'' <sub>PB</sub> ] <sub>alt</sub> and [10f'' <sub>SB</sub> ] <sub>alt</sub> .                                                                                                                                                                                                                                                                          | 43 |
| <b>Fig. S18</b> | Molecular orbital showing the presence of lone pair on the nitrogen atom of the complexes [8c'' <sub>PB</sub> ] <sub>dis</sub> and [8f'' <sub>SB</sub> ] <sub>dis</sub> .                                                                                                                                                                                                                                                                                           | 44 |
| <b>Fig. S19</b> | Optimized geometries of the TS (TS <sub>hyb</sub> ) involved during conversion of [6] <sub>dis</sub> →[7] <sub>alt</sub> in all possible spin states for the molecules (a) [1c'' <sub>PB</sub> ] and (b) [1f'' <sub>SB</sub> ] at M06-L-D3(heptane)/6-311+G* level of theory.                                                                                                                                                                                       | 45 |
| <b>Fig. S20</b> | Energy profile diagram for the reduction process of N <sub>2</sub> to NH <sub>3</sub> mediated by the catalyst [1f'' <sub>SB</sub> ].                                                                                                                                                                                                                                                                                                                               | 46 |
| <b>Fig. S21</b> | Reaction profile diagram for the conversion of [4f'' <sub>SB</sub> ] to [5f'' <sub>SB</sub> ] <sub>alt</sub> via alternating pathway at M06-L-D3(heptane)/6-311+G* level of theory.                                                                                                                                                                                                                                                                                 | 48 |
| <b>Fig. S22</b> | Reaction profile diagram for the conversion of [4f'' <sub>SB</sub> ] to [5f'' <sub>SB</sub> ] <sub>dis</sub> via                                                                                                                                                                                                                                                                                                                                                    | 48 |

|                 |                                                                                                                                                                                                                                                                                              |        |
|-----------------|----------------------------------------------------------------------------------------------------------------------------------------------------------------------------------------------------------------------------------------------------------------------------------------------|--------|
|                 | distal pathway at M06-L-D3(heptane)/6-311+G* level of theory.                                                                                                                                                                                                                                |        |
| <b>Fig. S23</b> | Pictorial representation of the molecular orbital showing the lone pairs situated at the sulphur atoms of the complex $[4f''_{SB}]$ .                                                                                                                                                        | 49     |
| <b>Fig. S24</b> | Optimized geometries of the TSs involved in the conversion of $[5f''_{SB}]_{alt}$ , $[6f''_{SB}]_{alt}$ and $[7f''_{SB}]_{alt}$ to $[5f''_{SB}]_{dis}$ , $[6f''_{SB}]_{dis}$ and $[7f''_{SB}]_{dis}$ respectively via proton transfer pathway at M06-L-D3(heptane)/6-311+G* level of theory. | 50     |
| <b>Fig. S25</b> | Reaction profile diagram for the conversion of $[6f''_{SB}]_{dis} \rightarrow [fc''_{PB}]_{alt}$ via hybrid pathway at M06-L-D3(heptane)/6-311+G* level of theory.                                                                                                                           | 51     |
|                 | Generation of $[5f''_{SB}]_{alt}$ and $[5f''_{SB}]_{dis}$ for the catalyst $[1f''_{SB}]$                                                                                                                                                                                                     | 47-49  |
|                 | Hybrid pathway for the catalyst $[1f''_{SB}]$                                                                                                                                                                                                                                                | 51-52  |
|                 | Cartesian coordinates of all calculated geometries                                                                                                                                                                                                                                           | 53-529 |

**Table S1:** Calculated (M06-L-D3(heptane)/6-311+G\*) important geometrical parameters, natural charges and pyramidalization angle (in degree) at the metal ( $\theta_V$ ) and apical ( $\theta_X$ , X = B, C and Si) center for the Schrock complex ( $\{[\text{HIPTN}_3\text{N}]\text{-V}\}$ ) and model vanadium complexes considered in this study. Also, given are the energies (in eV) of the donor ( $E_{\text{HOMO}}$ ), acceptor ( $E_{\text{LUMO}}$ ) orbitals (centered at the transition metal center) of the parent vanadium complexes  $[\mathbf{1a}'_{\text{PC}}]\text{-}[\mathbf{1f}'_{\text{SB}}]$ ,  $[\mathbf{1a}''_{\text{PC}}]\text{-}[\mathbf{1f}''_{\text{SB}}]$  and  $\{[\text{HIPTN}_3\text{N}]\text{-V}\}$ . Bond lengths are given in Å and WBI values are given within parenthesis.

| Molecules                               | V-E              | V-X              | $q_V$  | $q_X$  | $\theta_V/\theta_X$ | $E_{\text{HOMO}}$ | $E_{\text{LUMO}}$ |
|-----------------------------------------|------------------|------------------|--------|--------|---------------------|-------------------|-------------------|
| $\{[\text{HIPTN}_3\text{N}]\text{-V}\}$ | 1.955<br>(0.662) | 2.113<br>(0.350) | 1.179  | -0.567 | 3.7/20.7            | -4.09             | -1.90             |
| $[\mathbf{1a}'_{\text{PC}}]$            | 2.484<br>(0.501) | 2.259<br>(0.556) | -0.094 | -0.384 | 3.9/35.2            | -2.41             | -1.12             |
| $[\mathbf{1b}'_{\text{PSi}}]$           | 2.494<br>(0.509) | 2.489<br>(0.792) | -0.375 | 1.142  | 8.1/34.6            | -2.47             | -1.39             |
| $[\mathbf{1c}'_{\text{PB}}]$            | 2.464<br>(0.445) | 2.664<br>(0.233) | -0.139 | 0.726  | 6.7/10.7            | -2.56             | -1.37             |
| $[\mathbf{1d}'_{\text{SC}}]$            | 2.491<br>(0.472) | 2.201<br>(0.571) | 0.042  | -0.403 | 1.9/31.0            | -2.02             | -0.91             |
| $[\mathbf{1e}'_{\text{SSi}}]$           | 2.492<br>(0.493) | 2.465<br>(0.849) | -0.260 | 1.129  | 6.2/30.5            | -2.32             | -1.04             |
| $[\mathbf{1f}'_{\text{SB}}]$            | 2.484<br>(0.437) | 2.496<br>(0.260) | 0.024  | 0.640  | 2.5/9.6             | -2.16             | -1.10             |
| $[\mathbf{1a}''_{\text{PC}}]$           | 2.473<br>(0.484) | 2.259<br>(0.435) | 0.044  | -0.404 | 8.0/24.1            | -2.69             | -1.38             |
| $[\mathbf{1b}''_{\text{PSi}}]$          | 2.477<br>(0.492) | 2.432<br>(0.742) | -0.383 | 1.166  | 11.0/34.0           | -2.78             | -1.41             |
| $[\mathbf{1c}''_{\text{PB}}]$           | 2.486<br>(0.447) | 2.490<br>(0.225) | -0.027 | 0.614  | 6.6/13.7            | -2.84             | -1.49             |
| $[\mathbf{1d}''_{\text{SC}}]$           | 2.456<br>(0.497) | 2.185<br>(0.514) | 0.168  | -0.432 | 1.8/26.7            | -2.58             | -1.39             |
| $[\mathbf{1e}''_{\text{SSi}}]$          | 2.510<br>(0.452) | 2.392<br>(0.843) | -0.120 | 1.102  | 5.9/32.6            | -2.51             | -1.38             |
| $[\mathbf{1f}''_{\text{SB}}]$           | 2.463<br>(0.449) | 2.409<br>(0.252) | 0.156  | 0.541  | 2.3/13.4            | -2.68             | -1.29             |

**Table S2:** Calculated total energies (in hartree) of the model vanadium complexes ( $[1a'_{PC}]$ - $[1f'_{SB}]$  and  $[1a''_{PC}]$ - $[1f''_{SB}]$ ) and Schrock's vanadium complex ( $\{[HIPTN_3N]-V\}$ ) in different spin states at M06-L-D3(heptane)/6-311+G\* level of theory. The relative energy values are given in kcal mol<sup>-1</sup>.

| <b>Molecules</b>   | <b>Singlet</b> | <b>Triplet</b> | <b>Quintet</b> |
|--------------------|----------------|----------------|----------------|
| $[1a'_{PC}]$       | -2952.464596   | -2952.496129   | -2952.517639   |
|                    | 33.3           | 13.5           | 0.0            |
| $[1b'_{PSi}]$      | -3203.913569   | -3203.928098   | -3203.94156    |
|                    | 17.6           | 8.4            | 0.0            |
| $[1d'_{SC}]$       | -2767.618285   | -2767.650911   | -2767.668511   |
|                    | 31.5           | 11.0           | 0.0            |
| $[1e'_{SSi}]$      | -3019.058286   | -3019.075126   | -3019.083593   |
|                    | 15.9           | 5.3            | 0.0            |
| $[1a''_{PC}]$      | -3409.749209   | -3409.788918   | -3409.796611   |
|                    | 29.7           | 4.8            | 0.0            |
| $[1b''_{PSi}]$     | -3661.170581   | -3661.168336   | -3661.210176   |
|                    | 24.8           | 26.3           | 0.0            |
| $[1d''_{SC}]$      | -3224.890452   | -3224.933073   | -3224.941794   |
|                    | 32.2           | 5.4            | 0.0            |
| $[1e''_{SSi}]$     | -3476.322323   | -3476.330035   | -3476.343678   |
|                    | 13.4           | 8.5            | 0.0            |
| $\{[HIPTN_3N]-V\}$ | -2093.430155   | -2093.484933   | -              |
|                    | 34.4           | 0.0            | -              |
|                    | <b>Doublet</b> | <b>Quartet</b> | <b>Sextet</b>  |
| $[1c'_{PB}]$       | -2939.250047   | -2939.269191   | -2939.287303   |
|                    | 23.4           | 11.4           | 0.0            |
| $[1f'_{SB}]$       | -2754.40212    | -2754.432067   | -2754.429904   |
|                    | 18.8           | 0.0            | 1.3            |
| $[1c''_{PB}]$      | -3396.539453   | -3396.561486   | -3396.550338   |
|                    | 13.8           | 0.0            | 7.0            |
| $[1f''_{SB}]$      | -3211.691152   | -3211.719426   | -3211.700927   |
|                    | 17.74          | 0.0            | 11.61          |



**Table S3:** Difference between the ideal spin and calculated spin (spin contamination) of the parent complexes in their different spin states at M06-L-D3(heptane)/6-311+G\* level of theory.

| Molecules              | S   | Ideal spin<br>S(S+1) | Calculated Value<br><S <sup>2</sup> > | Difference between<br><S <sup>2</sup> > and S(S+1) |
|------------------------|-----|----------------------|---------------------------------------|----------------------------------------------------|
| [1a' <sub>PC</sub> ]   | 1   | 2                    | 2.006                                 | 0.006                                              |
|                        | 2   | 6                    | 6.001                                 | 0.001                                              |
| [1b' <sub>PSi</sub> ]  | 1   | 2                    | 2.010                                 | 0.10                                               |
|                        | 2   | 6                    | 6.001                                 | 0.001                                              |
| [1c' <sub>PB</sub> ]   | 1/2 | 0.75                 | 1.279                                 | 0.529                                              |
|                        | 3/2 | 3.75                 | 3.757                                 | 0.003                                              |
|                        | 5/2 | 8.75                 | 8.750                                 | 0.0                                                |
| [1d' <sub>SC</sub> ]   | 1   | 2                    | 2.028                                 | 0.028                                              |
|                        | 2   | 6                    | 6.000                                 | 0.0                                                |
| [1e' <sub>SSi</sub> ]  | 1   | 2                    | 2.003                                 | 0.003                                              |
|                        | 2   | 6                    | 6.000                                 | 0.0                                                |
| [1f' <sub>SB</sub> ]   | 1/2 | 0.75                 | 1.612                                 | 0.862                                              |
|                        | 3/2 | 3.75                 | 3.755                                 | 0.005                                              |
|                        | 5/2 | 8.75                 | 8.750                                 | 0.0                                                |
| [1a'' <sub>PC</sub> ]  | 1   | 2                    | 2.010                                 | 0.010                                              |
|                        | 2   | 6                    | 6.001                                 | 0.001                                              |
| [1b'' <sub>PSi</sub> ] | 1   | 2                    | 2.018                                 | 0.018                                              |
|                        | 2   | 6                    | 6.001                                 | 0.001                                              |
| [1c'' <sub>PB</sub> ]  | 1/2 | 0.75                 | 0.824                                 | 0.074                                              |
|                        | 3/2 | 3.75                 | 3.753                                 | 0.003                                              |
|                        | 5/2 | 8.75                 | 8.750                                 | 0.0                                                |
| [1d'' <sub>SC</sub> ]  | 1   | 2                    | 2.012                                 | 0.012                                              |
|                        | 2   | 6                    | 6.000                                 | 0.0                                                |
| [1e'' <sub>SSi</sub> ] | 1   | 2                    | 2.002                                 | 0.002                                              |
|                        | 2   | 6                    | 6.000                                 | 0.0                                                |
| [1f'' <sub>SB</sub> ]  | 1/2 | 0.75                 | 0.782                                 | 0.032                                              |
|                        | 3/2 | 3.75                 | 3.751                                 | 0.001                                              |
|                        | 5/2 | 8.75                 | 8.750                                 | 0.0                                                |

**Table S4:** Calculated total energies (in hartree) of the dinitrogen-vanadium complexes ( $[2a'_{PC}]$ - $[2f'_{SB}]$ ,  $[2a''_{PC}]$ - $[2f''_{SB}]$  and  $\{[HIPTN_3N]-V-N_2\}$  in different spin states at M06-L-D3(heptane)/6-311+G\* level of theory. The relative energy values are given in kcal mol<sup>-1</sup>.

| <b>Molecules</b>       | <b>Singlet</b> | <b>Triplet</b> | <b>Quintet</b> |
|------------------------|----------------|----------------|----------------|
| $[2a'_{PC}]$           | -3062.061055   | -3062.091439   | -3062.105256   |
|                        | 27.7           | 8.7            | 0.0            |
| $[2b'_{PSi}]$          | -3313.505749   | -3313.505749   | -3313.533523   |
|                        | 17.4           | 7.2            | 0.0            |
| $[2d'_{SC}]$           | -2877.217256   | -2877.247403   | -2877.257312   |
|                        | 18.9           | 6.2            | 0.0            |
| $[2e'_{SSi}]$          | -3128.659431   | -3128.668457   | -3128.672737   |
|                        | 8.3            | 2.7            | 0.0            |
| $[2a''_{PC}]$          | -3519.347311   | -3519.364609   | -3519.383039   |
|                        | 22.4           | 11.6           | 0.0            |
| $[2b''_{PSi}]$         | -3770.757952   | -3770.766436   | -3770.793091   |
|                        | 22.1           | 16.7           | 0.0            |
| $[2d''_{SC}]$          | -3334.481208   | -3334.512618   | -3334.525177   |
|                        | 27.6           | 7.9            | 0.0            |
| $[2e''_{SSi}]$         | -3585.908719   | -3585.921087   | -3585.931978   |
|                        | 14.6           | 6.8            | 0.0            |
| $\{[HIPTN_3N]-V-N_2\}$ | -2202.998308   | -2203.040594   | -              |
|                        | 26.5           | 0.0            | -              |
|                        | <b>Doublet</b> | <b>Quartet</b> | <b>Sextet</b>  |
| $[2c'_{PB}]$           | -3048.847491   | -3048.857882   | -3048.877617   |
|                        | 18.9           | 12.4           | 0.0            |
| $[2f'_{SB}]$           | -2863.994574   | -2864.006510   | -2864.018742   |
|                        | 15.2           | 7.7            | 0.0            |
| $[2c''_{PB}]$          | -3506.108057   | -3506.127517   | -3506.135445   |
|                        | 17.2           | 5.0            | 0.0            |
| $[2f''_{SB}]$          | -3321.274745   | -3321.271703   | -3321.285024   |
|                        | 6.4            | 8.3            | 0.0            |

**Table S5:** Calculated (M06-L-D3(heptane)/6-311+G\*) important geometrical parameters and natural charge at the metal (V) and  $\alpha$  ( $q_{N\alpha}$ ) and  $\beta$  ( $q_{N\beta}$ ) nitrogen atoms of the dinitrogen complexes of Schrock complex and model vanadium complexes considered in this study. Bond lengths are given in Å and WBI values are given within parenthesis.

| Molecule                                   | V-E              | V-X              | V-N              | N≡N              | $\nu(N\equiv N)$ | $q_V$  | $q_{N\alpha}$ | $q_{N\beta}$ | $\theta_M/\theta_X$ |
|--------------------------------------------|------------------|------------------|------------------|------------------|------------------|--------|---------------|--------------|---------------------|
| {[HIPTN <sub>3</sub> N]-V-N <sub>2</sub> } | 1.960<br>(0.774) | 2.182<br>(0.360) | 2.081<br>(0.598) | 1.114<br>(2.773) | 2229.66          | 0.887  | -0.008        | 0.086        | 5.9/22.8            |
| [2a' <sub>PC</sub> ]                       | 2.492<br>(0.602) | 2.332<br>(0.543) | 2.019<br>(0.697) | 1.135<br>(2.529) | 2029.86          | -0.394 | -0.099        | -0.061       | 8.1/36.9            |
| [2b' <sub>PSi</sub> ]                      | 2.509<br>(0.628) | 2.563<br>(0.772) | 2.006<br>(0.712) | 1.139<br>(2.499) | 2003.09          | -0.811 | -0.118        | -0.070       | 13.8/36.8           |
| [2c' <sub>PB</sub> ]                       | 2.488<br>(0.510) | 2.967<br>(0.164) | 2.001<br>(0.623) | 1.138<br>(2.491) | 2009.86          | -0.285 | -0.180        | -0.059       | 20.0/9.3            |
| [2d' <sub>SC</sub> ]                       | 2.519<br>(0.542) | 2.262<br>(0.544) | 2.016<br>(0.712) | 1.136<br>(2.511) | 2025.25          | -0.159 | -0.127        | -0.066       | 4.9/33.6            |
| [2e' <sub>SSi</sub> ]                      | 2.534<br>(0.546) | 2.543<br>(0.833) | 2.010<br>(0.733) | 1.139<br>(2.495) | 2004.15          | -0.523 | -0.138        | -0.073       | 11.4/32.2           |
| [2f' <sub>SB</sub> ]                       | 2.501<br>(0.508) | 2.658<br>(0.226) | 2.008<br>(0.670) | 1.136<br>(2.512) | 2027.92          | -0.159 | -0.153        | -0.057       | 9.1/11.0            |
| [2a'' <sub>PC</sub> ]                      | 2.491<br>(0.581) | 2.331<br>(0.420) | 2.013<br>(0.683) | 1.134<br>(2.537) | 2037.3           | -0.261 | -0.104        | -0.044       | 13.0/26.0           |
| [2b'' <sub>PSi</sub> ]                     | 2.537<br>(0.576) | 2.503<br>(0.726) | 2.023<br>(0.641) | 1.133<br>(2.549) | 2043.4           | -0.679 | -0.115        | -0.044       | 15.9/38.0           |
| [2c'' <sub>PB</sub> ]                      | 2.521<br>(0.507) | 2.612<br>(0.194) | 2.009<br>(0.619) | 1.134<br>(2.535) | 2041.6           | -0.220 | -0.142        | -0.037       | 13.7/15.5           |
| [2d'' <sub>SC</sub> ]                      | 2.476<br>(0.577) | 2.251<br>(0.488) | 2.023<br>(0.712) | 1.132<br>(2.559) | 2058.4           | -0.119 | -0.100        | -0.039       | 4.6/29.3            |
| [2e'' <sub>SSi</sub> ]                     | 2.523<br>(0.554) | 2.473<br>(0.840) | 2.021<br>(0.714) | 1.135<br>(2.534) | 2033.7           | -0.507 | -0.124        | -0.051       | 10.1/35.3           |
| [2f'' <sub>SB</sub> ]                      | 2.480<br>(0.528) | 2.532<br>(0.237) | 2.015<br>(0.670) | 1.132<br>(2.558) | 2060.7           | -0.111 | -0.125        | -0.029       | 7.0/15.8            |

**Table S6:** Difference between the ideal spin and calculated spin (spin contamination) of the dinitrogen vanadium complexes in their different spin states at M06-L-D3(heptane)/6-311+G\* level of theory.

| Molecules              | S   | Ideal spin<br>S(S+1) | Calculated Value<br><S <sup>2</sup> > | Difference between<br><S <sup>2</sup> > and S(S+1) |
|------------------------|-----|----------------------|---------------------------------------|----------------------------------------------------|
| [2a' <sub>PC</sub> ]   | 1   | 2                    | 2.002                                 | 0.002                                              |
|                        | 2   | 6                    | 6.001                                 | 0.001                                              |
| [2b' <sub>PSi</sub> ]  | 1   | 2                    | 2.031                                 | 0.031                                              |
|                        | 2   | 6                    | 6.001                                 | 0.001                                              |
| [2c' <sub>PB</sub> ]   | 1/2 | 0.75                 | 0.973                                 | 0.223                                              |
|                        | 3/2 | 3.75                 | 3.753                                 | 0.003                                              |
|                        | 5/2 | 8.75                 | 8.751                                 | 0.001                                              |
| [2d' <sub>SC</sub> ]   | 1   | 2                    | 2.008                                 | 0.008                                              |
|                        | 2   | 6                    | 6.000                                 | 0.0                                                |
| [2e' <sub>SSi</sub> ]  | 1   | 2                    | 2.002                                 | 0.002                                              |
|                        | 2   | 6                    | 6.001                                 | 0.001                                              |
| [2f' <sub>SB</sub> ]   | 1/2 | 0.75                 | 1.009                                 | 0.259                                              |
|                        | 3/2 | 3.75                 | 3.756                                 | 0.006                                              |
|                        | 5/2 | 8.75                 | 8.750                                 | 0.0                                                |
| [2a'' <sub>PC</sub> ]  | 1   | 2                    | 2.002                                 | 0.002                                              |
|                        | 2   | 6                    | 6.001                                 | 0.001                                              |
| [2b'' <sub>PSi</sub> ] | 1   | 2                    | 2.008                                 | 0.008                                              |
|                        | 2   | 6                    | 6.001                                 | 0.001                                              |
| [2c'' <sub>PB</sub> ]  | 1/2 | 0.75                 | 0.974                                 | 0.224                                              |
|                        | 3/2 | 3.75                 | 3.753                                 | 0.003                                              |
|                        | 5/2 | 8.75                 | 8.751                                 | 0.001                                              |
| [2d'' <sub>SC</sub> ]  | 1   | 2                    | 2.005                                 | 0.005                                              |
|                        | 2   | 6                    | 6.001                                 | 0.001                                              |
| [2e'' <sub>SSi</sub> ] | 1   | 2                    | 2.002                                 | 0.002                                              |
|                        | 2   | 6                    | 6.001                                 | 0.001                                              |
| [2f'' <sub>SB</sub> ]  | 1/2 | 0.75                 | 0.895                                 | 0.145                                              |
|                        | 3/2 | 3.75                 | 3.751                                 | 0.001                                              |
|                        | 5/2 | 8.75                 | 8.750                                 | 0.0                                                |

**Table S7:** Calculated relative energy difference (in kcal mol<sup>-1</sup>) between the possible spin states of the complexes [1d'<sub>SC</sub>]-[1f'<sub>SB</sub>] and [2d'<sub>SC</sub>]-[2f'<sub>SB</sub>] at B3PW91-D3(heptane), PBE0-D3(heptane) and M06-L-D3(heptane) level of theory. The total energies (TE) are in hartrees and relative energy difference values are given in kcal mol<sup>-1</sup>.

|                       | B3PW91      |              |                 | PBE0        |              |                 | M06-L       |              |                 |
|-----------------------|-------------|--------------|-----------------|-------------|--------------|-----------------|-------------|--------------|-----------------|
|                       | Spin States | T.E.         | Relative Energy | Spin States | T.E.         | Relative Energy | Spin States | T.E.         | Relative Energy |
| [1d' <sub>SC</sub> ]  | Singlet     | -2767.480814 | 30.8            | Singlet     | -2766.395144 | 31.5            | Singlet     | -2767.618285 | 31.52           |
|                       | Triplet     | -2767.507422 | 14.1            | Triplet     | -2766.425991 | 11.0            | Triplet     | -2767.650911 | 11.04           |
|                       | Quintet     | -2767.529825 | 0.0             | Quintet     | -2766.448601 | 0.0             | Quintet     | -2767.668511 | 0.0             |
| [1e' <sub>SSI</sub> ] | Singlet     | -3018.900104 | 17.3            | Singlet     | -3017.756243 | 19.4            | Singlet     | -3019.058286 | 15.9            |
|                       | Triplet     | -3018.91722  | 6.6             | Triplet     | -3017.776773 | 6.5             | Triplet     | -3019.075126 | 5.3             |
|                       | Quintet     | -3018.927702 | 0.0             | Quintet     | -3017.787211 | 0.0             | Quintet     | -3019.083593 | 0.0             |
| [1f' <sub>SB</sub> ]  | Doublet     | -2754.265879 | 18.9            | Doublet     | -2753.187921 | 19.3            | Doublet     | -2754.40212  | 18.8            |
|                       | Quartet     | -2754.296035 | 0.0             | Quartet     | -2753.21870  | 0.0             | Quartet     | -2754.432067 | 0.0             |
|                       | Sextet      | -2754.291194 | 3.0             | Sextet      | -2753.213139 | 3.5             | Sextet      | -2754.429904 | 1.3             |
| [2d' <sub>SC</sub> ]  | Singlet     | -2877.039376 | 22.1            | Singlet     | -2875.874093 | 25.1            | Singlet     | -2877.217256 | 18.9            |
|                       | Triplet     | -2877.068603 | 3.8             | Triplet     | -2875.907662 | 4.1             | Triplet     | -2877.247403 | 6.2             |
|                       | Quintet     | -2877.074657 | 0.0             | Quintet     | -2875.914153 | 0.0             | Quintet     | -2877.257312 | 0.0             |
| [2e' <sub>SSI</sub> ] | Singlet     | -3128.46092  | 7.2             | Singlet     | -3127.238553 | 8.9             | Singlet     | -3128.659431 | 8.3             |
|                       | Triplet     | -3128.472305 | 0.04            | Triplet     | -3127.252833 | -0.1            | Triplet     | -3128.668457 | 2.7             |
|                       | Quintet     | -3128.472376 | 0.0             | Quintet     | -3127.252722 | 0.0             | Quintet     | -3128.672737 | 0.0             |
| [2f' <sub>SB</sub> ]  | Doublet     | -2863.814039 | 13.0            | Doublet     | -2862.659204 | 11.8            | Doublet     | -2863.994574 | 15.2            |
|                       | Quartet     | -2863.82657  | 5.1             | Quartet     | -2862.669785 | 5.1             | Quartet     | -2864.00651  | 7.7             |
|                       | Sextet      | -2863.834679 | 0.0             | Sextet      | -2862.677976 | 0.0             | Sextet      | -2864.018742 | 0.0             |

**Table S8:** Calculated reaction free energies ( $\Delta G$ , in kcal mol<sup>-1</sup>) associated with the formation of the diazenido complex via the PCET pathway for our proposed complexes

| Molecule              | $\Delta G$ | Molecule               | $\Delta G$ |
|-----------------------|------------|------------------------|------------|
| [2a' <sub>PC</sub> ]  | -1.9       | [2a'' <sub>PC</sub> ]  | 0.8        |
| [2b' <sub>PSi</sub> ] | -5.9       | [2b'' <sub>PSi</sub> ] | 1.4        |
| [2c' <sub>PB</sub> ]  | 0.8        | [2c'' <sub>PB</sub> ]  | -0.8       |
| [2d' <sub>SC</sub> ]  | 1.0        | [2d'' <sub>SC</sub> ]  | 3.5        |
| [2e' <sub>SSi</sub> ] | 0.3        | [2e'' <sub>SSi</sub> ] | 1.3        |
| [2f' <sub>SB</sub> ]  | 1.9        | [2f'' <sub>SB</sub> ]  | 3.5        |

**Table S9:** Calculated total energies (in hartree) of the complex [3] in different spin states at M06-L-D3(heptane)/6-311+G\* level of theory. The relative energy values are given in kcal mol<sup>-1</sup>.

| Molecule              | Singlet        | Triplet        | Molecule               | Singlet        | Triplet        |
|-----------------------|----------------|----------------|------------------------|----------------|----------------|
| [3a' <sub>PC</sub> ]  | -3062.485948   | -3062.515879   | [3a'' <sub>PC</sub> ]  | -3519.762496   | -3519.781959   |
|                       | 18.8           | 0.0            |                        | 12.2           | 0.0            |
| [3b' <sub>PSi</sub> ] | -3313.916134   | -3313.941683   | [3b'' <sub>PSi</sub> ] | -3771.160945   | -3771.188296   |
|                       | 16.0           | 0.0            |                        | 17.2           | 0.0            |
| [3d' <sub>SC</sub> ]  | -2877.633713   | -2877.659059   | [3d'' <sub>SC</sub> ]  | -3334.888116   | -3334.916108   |
|                       | 15.9           | 0.0            |                        | 17.5           | 0.0            |
| [3e' <sub>SSi</sub> ] | -3129.065253   | -3129.076381   | [3e'' <sub>SSi</sub> ] | -3586.306388   | -3586.318558   |
|                       | 7.0            | 0.0            |                        | 7.6            | 0.0            |
|                       | <b>Doublet</b> | <b>Quartet</b> |                        | <b>Doublet</b> | <b>Quartet</b> |
| [3c' <sub>PB</sub> ]  | -3049.274818   | -3049.279552   | [3f' <sub>SB</sub> ]   | -2864.408992   | -2864.418883   |
|                       | 2.0            | 0.0            |                        | 6.2            | 0.0            |
| [3c'' <sub>PB</sub> ] | -3506.527884   | -3506.526313   | [3f'' <sub>SB</sub> ]  | -3321.658404   | -3321.670568   |
|                       | 0.0            | 1.0            |                        | 7.6            | 0.0            |

**Table S10:** Calculated reaction free energies for the protonation of the equatorial sulphur and nitrogen atom, metal center and distal nitrogen atom of the dinitrogen complexes  $[2a'_{PC}]-[2f'_{SB}]$  and  $[2a''_{PC}]-[2f''_{SB}]$  and  $\{[HIPTN_3N]-V\}$ .

| Molecules              | S/N  | V     | $N_\beta$ |
|------------------------|------|-------|-----------|
| $\{[HIPTN_3N]-V-N_2\}$ | -7.0 | 29.7  | 38.4      |
| $[2a'_{PC}]$           | -    | -18.8 | -6.0      |
| $[2b'_{PSi}]$          | -    | -17.8 | -3.9      |
| $[2c'_{PB}]$           | -    | -21.3 | -0.7      |
| $[2d'_{SC}]$           | 19.3 | -17.4 | 0.4       |
| $[2e'_{SSi}]$          | 16.9 | -19.6 | -1.6      |
| $[2f'_{SB}]$           | 19.7 | -25.3 | 0.2       |
| $[2a''_{PC}]$          | -    | -12.2 | 0.7       |
| $[2b''_{PSi}]$         | -    | -13.5 | 3.2       |
| $[2c''_{PB}]$          | -    | -12.2 | 5.5       |
| $[2d''_{SC}]$          | 19.7 | -14.5 | 6.7       |
| $[2e''_{SSi}]$         | 16.9 | -11.3 | 8.3       |
| $[2f''_{SB}]$          | 22.2 | -15.2 | 8.7       |

**Table S11:** Calculated activation energy barrier (in kcal mol<sup>-1</sup>) for the transition states **TS1** and **TS2** and reaction free energy (in kcal mol<sup>-1</sup>) for the formation of the intermediate involved in the formation of the **[3]** from the metal protonated vanadium complexes **[3-V-H]<sup>+</sup>**. The reaction free energies were evaluated with respect to the metal protonated species.

| <b>Molecules</b>          | $\Delta G^{\ddagger}_{\text{TS1}}$ | $\Delta G_{\text{Int}}$ | $\Delta G^{\ddagger}_{\text{TS2}}$ |
|---------------------------|------------------------------------|-------------------------|------------------------------------|
| <b>a'</b> <sub>PC</sub>   | 40.7                               | 19.8                    | 36.5                               |
| <b>b'</b> <sub>PSi</sub>  | 40.9                               | 17.5                    | 33.6                               |
| <b>c'</b> <sub>PB</sub>   | 40.0                               | 16.0                    | 25.9                               |
| <b>d'</b> <sub>SC</sub>   | 40.0                               | 22.0                    | 25.8                               |
| <b>e'</b> <sub>SSi</sub>  | 43.1                               | 22.9                    | 30.2                               |
| <b>f'</b> <sub>SB</sub>   | 47.5                               | 22.8                    | 35.4                               |
| <b>a''</b> <sub>PC</sub>  | 41.7                               | 17.7                    | 34.8                               |
| <b>b''</b> <sub>PSi</sub> | 41.3                               | 14.1                    | 28.7                               |
| <b>c''</b> <sub>PB</sub>  | 40.0                               | 21.6                    | 29.2                               |
| <b>d''</b> <sub>SC</sub>  | 38.5                               | 18.1                    | 31.8                               |
| <b>e''</b> <sub>SSi</sub> | 41.9                               | 17.6                    | 36.7                               |
| <b>f''</b> <sub>SB</sub>  | 41.9                               | 21.1                    | 30.4                               |



**Table S12:** Calculated (M06-L-D3(heptane)/6-311+G\*) important geometrical parameters and natural charge at the metal (V) and  $\alpha$  ( $q_{N\alpha}$ ) and  $\beta$  ( $q_{N\beta}$ ) nitrogen atoms of for the diazenido complex (**[4]**) of the Schrock complex and model vanadium complexes considered in this study. Bond lengths are given in Å and WBI values are given within parenthesis.

| Molecule                   | V-E              | V-X              | V-N              | N≡N              | $\nu(\text{N}\equiv\text{N})$ | $q_V$  | $q_{N\alpha}$ | $q_{N\beta}$ |
|----------------------------|------------------|------------------|------------------|------------------|-------------------------------|--------|---------------|--------------|
| {[HIPTN <sub>3</sub> N]-V} | 1.946<br>(0.867) | 2.220<br>(0.349) | 1.783<br>(1.414) | 1.218<br>(1.842) | 1648.8                        | 0.818  | -0.132        | -0.293       |
| [4a' <sub>PC</sub> ]       | 2.486<br>(0.632) | 2.388<br>(0.485) | 1.838<br>(1.471) | 1.239<br>(1.620) | 1543.1                        | -0.184 | -0.257        | -0.543       |
| [4b' <sub>PSi</sub> ]      | 2.472<br>(0.658) | 2.604<br>(0.717) | 1.818<br>(1.270) | 1.244<br>(1.707) | 1527.7                        | -0.774 | -0.268        | -0.405       |
| [4c' <sub>PB</sub> ]       | 2.490<br>(0.543) | 3.197<br>(0.124) | 1.811<br>(1.198) | 1.249<br>(1.672) | 1519.7                        | -0.189 | -0.369        | -0.404       |
| [4d' <sub>SC</sub> ]       | 2.544<br>(0.556) | 2.258<br>(0.546) | 1.847<br>(1.174) | 1.240<br>(1.798) | 1549.3                        | -0.022 | -0.334        | -0.379       |
| [4e' <sub>SSi</sub> ]      | 2.509<br>(0.606) | 2.571<br>(0.787) | 1.841<br>(1.261) | 1.238<br>(1.791) | 1554.0                        | -0.485 | -0.277        | -0.382       |
| [4f' <sub>SB</sub> ]       | 2.511<br>(0.534) | 2.712<br>(0.214) | 1.843<br>(1.166) | 1.237<br>(1.800) | 1557.7                        | -0.027 | -0.341        | -0.375       |
| [4a'' <sub>PC</sub> ]      | 2.489<br>(0.606) | 2.375<br>(0.407) | 1.823<br>(1.254) | 1.240<br>(1.745) | 1536.4                        | -0.177 | -0.270        | -0.381       |
| [4b'' <sub>PSi</sub> ]     | 2.531<br>(0.615) | 2.529<br>(0.712) | 1.828<br>(1.222) | 1.237<br>(1.757) | 1544.5                        | -0.649 | -0.267        | -0.373       |
| [4c'' <sub>PB</sub> ]      | 2.524<br>(0.530) | 2.657<br>(0.185) | 1.828<br>(1.125) | 1.238<br>(1.776) | 1544.9                        | -0.115 | -0.328        | -0.373       |
| [4d'' <sub>SC</sub> ]      | 2.478<br>(0.595) | 2.294<br>(0.484) | 1.833<br>(1.303) | 1.235<br>(1.774) | 1556.8                        | -0.024 | -0.257        | -0.374       |
| [4e'' <sub>SSi</sub> ]     | 2.528<br>(0.575) | 2.488<br>(0.831) | 1.849<br>(1.235) | 1.240<br>(1.782) | 1542.9                        | -0.412 | -0.296        | -0.393       |
| [4f'' <sub>SB</sub> ]      | 2.477<br>(0.555) | 2.617<br>(0.226) | 1.825<br>(1.257) | 1.236<br>(1.769) | 1553.8                        | -0.018 | -0.290        | -0.367       |

**Table S13:** Calculated total energies (in hartree) of the diazenido-vanadium complexes in different spin states at M06-L-D3/6-311+G\*(heptane) level of theory. The relative energy values are given in kcal mol<sup>-1</sup>.

|                             | <b>Doublet</b> | <b>Quartet</b> |                |
|-----------------------------|----------------|----------------|----------------|
| <b>[4a'<sub>PC</sub>]</b>   | -3062.654015   | -3062.653876   |                |
|                             | 0.0            | 0.09           |                |
| <b>[4b'<sub>PSi</sub>]</b>  | -3314.086338   | -3314.088377   |                |
|                             | 1.3            | 0.0            |                |
| <b>[4d'<sub>SC</sub>]</b>   | -2877.803983   | -2877.804475   |                |
|                             | 0.31           | 0.00           |                |
| <b>[4e'<sub>SSi</sub>]</b>  | -3129.227147   | -3129.217811   |                |
|                             | 0.0            | 5.8            |                |
| <b>[4a''<sub>PC</sub>]</b>  | -3519.913382   | -3519.92604    |                |
|                             | 7.9            | 0.0            |                |
| <b>[4b''<sub>PSi</sub>]</b> | -3771.333483   | -3771.336353   |                |
|                             | 1.8            | 0.0            |                |
| <b>[4d''<sub>SC</sub>]</b>  | -3335.061649   | -3335.065002   |                |
|                             | 2.1            | 0.0            |                |
| <b>[4e''<sub>SSi</sub>]</b> | -3586.473019   | -3586.475151   |                |
|                             | 1.3            | 0.0            |                |
|                             | <b>Singlet</b> | <b>Triplet</b> | <b>Quintet</b> |
| <b>[4c'<sub>PB</sub>]</b>   | -3049.397483   | -3049.418366   | -3049.421541   |
|                             | 15.10          | 1.99           | 0.00           |
| <b>[4f'<sub>SB</sub>]</b>   | -2864.543189   | -2864.562611   | -2864.561466   |
|                             | 12.2           | 0.0            | 0.7            |
| <b>[4c''<sub>PB</sub>]</b>  | -3506.648425   | -3506.671905   | -3506.679846   |
|                             | 19.7           | 5.0            | 0.0            |
| <b>[4f''<sub>SB</sub>]</b>  | -3321.806314   | -3321.821651   | -3321.825433   |
|                             | 12.0           | 2.4            | 0.0            |

**Table S14:** Reaction free energies ( $\Delta G$ , in kcal mol<sup>-1</sup>) obtained for the formation of the vanadium nitride complexes from the diazenido complexes [4].

| Molecules             | $\Delta G$ | Molecules              | $\Delta G$ |
|-----------------------|------------|------------------------|------------|
| [4a' <sub>PC</sub> ]  | -77.3      | [4a'' <sub>PC</sub> ]  | -75.4      |
| [4b' <sub>PSi</sub> ] | -73.2      | [4b'' <sub>PSi</sub> ] | -70.8      |
| [4c' <sub>PB</sub> ]  | -80.9      | [4c'' <sub>PB</sub> ]  | -75.3      |
| [4d' <sub>SC</sub> ]  | -82.5      | [4d'' <sub>SC</sub> ]  | -76.1      |
| [4e' <sub>SSi</sub> ] | -81.3      | [4e'' <sub>SSi</sub> ] | -74.1      |
| [4f' <sub>SB</sub> ]  | -84.6      | [4f'' <sub>SB</sub> ]  | -81.1      |

**Table S15:** Calculated (M06-L-D3(heptane)/6-311+G\*) important geometrical parameters for the vanadium-nitride complex ([8]<sub>dis</sub>) of [1a'<sub>PC</sub>]-[1f'<sub>SB</sub>] and [1a''<sub>PC</sub>]-[1f''<sub>SB</sub>]. Bond lengths are given in Å and WBI values are given within parenthesis.

| Molecules          | V≡N           | V-X           | $\Delta E_{H-L}$ |
|--------------------|---------------|---------------|------------------|
| a' <sub>PC</sub>   | 1.592 (2.774) | 2.307 (0.568) | 1.82             |
| b' <sub>PSi</sub>  | 1.593 (2.768) | 2.551 (0.727) | 1.76             |
| c' <sub>PB</sub>   | 1.587 (2.722) | 3.022 (0.140) | 1.13             |
| d' <sub>SC</sub>   | 1.583 (2.837) | 2.179 (0.602) | 1.79             |
| e' <sub>SSi</sub>  | 1.583 (2.870) | 2.488 (0.816) | 1.74             |
| f' <sub>SB</sub>   | 1.580 (2.838) | 2.568 (0.236) | 1.57             |
| a'' <sub>PC</sub>  | 1.593 (2.670) | 2.610 (0.183) | 1.56             |
| b'' <sub>PSi</sub> | 1.591 (2.759) | 2.493 (0.717) | 1.52             |
| c'' <sub>PB</sub>  | 1.580 (2.713) | 2.644 (0.199) | 1.15             |
| d'' <sub>SC</sub>  | 1.584 (2.850) | 2.240 (0.475) | 1.71             |
| e'' <sub>SSi</sub> | 1.579 (2.876) | 2.467 (0.789) | 1.57             |
| f'' <sub>SB</sub>  | 1.575 (2.871) | 2.570 (0.232) | 1.40             |

**Table S16:** Reaction free energies ( $\Delta G$ , in kcal mol<sup>-1</sup>) obtained for the release of hydrazine from the vanadium-hydrazine complex of the proposed vanadium complexes and Schrock's vanadium complex ( $\{[\text{HIPTN}_3\text{N}]\text{-V}\}$ ).

| <b>Molecules</b>                        | <b><math>\Delta G</math></b> | <b>Molecules</b>       | <b><math>\Delta G</math></b> |
|-----------------------------------------|------------------------------|------------------------|------------------------------|
| [1a' <sub>PC</sub> ]                    | 14.8                         | [1a'' <sub>PC</sub> ]  | 15.7                         |
| [1b' <sub>PSi</sub> ]                   | 17.2                         | [1b'' <sub>PSi</sub> ] | 11.2                         |
| [1c' <sub>PB</sub> ]                    | 14.8                         | [1c'' <sub>PB</sub> ]  | 14.8                         |
| [1d' <sub>SC</sub> ]                    | 15.9                         | [1d'' <sub>SC</sub> ]  | 16.0                         |
| [1e' <sub>SSi</sub> ]                   | 15.4                         | [1e'' <sub>SSi</sub> ] | 17.7                         |
| [1f' <sub>SB</sub> ]                    | 15.4                         | [1f'' <sub>SB</sub> ]  | 16.8                         |
| $\{[\text{HIPTN}_3\text{N}]\text{-V}\}$ | 9.7                          |                        |                              |

**Table S17:** Calculated (M06-L-D3(heptane)/6-311+G\*) important geometrical parameters and pyramidalization angle (in degree) around the vanadium center of [5c''<sub>PB</sub>]-[14c''<sub>PB</sub>]. Bond lengths are given in Å and WBI values are given within parenthesis.

| Molecules                             | V-N              | N-N              | V-B              | $\theta_V$ |
|---------------------------------------|------------------|------------------|------------------|------------|
| [5c'' <sub>PB</sub> ] <sub>alt</sub>  | 2.062<br>(0.500) | 1.278<br>(1.665) | 2.621<br>(0.201) | 17.3       |
| [6c'' <sub>PB</sub> ] <sub>alt</sub>  | 2.032<br>(0.557) | 1.305<br>(1.509) | 2.646<br>(0.182) | 16.2       |
| [7c'' <sub>PB</sub> ] <sub>alt</sub>  | 1.920<br>(0.888) | 1.404<br>(1.078) | 2.672<br>(0.186) | 19.8       |
| [8c'' <sub>PB</sub> ] <sub>alt</sub>  | 1.932<br>(0.865) | 1.435<br>(1.040) | 2.671<br>(0.176) | 18.2       |
| [9c'' <sub>PB</sub> ] <sub>alt</sub>  | 2.273<br>(0.255) | 1.443<br>(1.031) | 2.570<br>(0.202) | 13.9       |
| [10c'' <sub>PB</sub> ] <sub>alt</sub> | 2.278<br>(0.191) | 1.445<br>(1.029) | 2.563<br>(0.262) | 11.1       |
| [11c'' <sub>PB</sub> ] <sub>alt</sub> | 2.288<br>(0.242) | 1.469<br>(0.772) | 2.549<br>(0.207) | 10.9       |
| [5c'' <sub>PB</sub> ] <sub>dis</sub>  | 1.712<br>(1.646) | 1.327<br>(1.204) | 3.133<br>(0.091) | 36.7       |
| [6c'' <sub>PB</sub> ] <sub>dis</sub>  | 1.708<br>(1.705) | 1.359<br>(1.133) | 2.715<br>(0.172) | 20.2       |
| [7c'' <sub>PB</sub> ] <sub>dis</sub>  | 1.744<br>(1.504) | 1.407<br>(1.018) | 2.830<br>(0.162) | 26.5       |
| [8c'' <sub>PB</sub> ] <sub>dis</sub>  | 1.580<br>(2.713) | -                | 2.644<br>(0.199) | 16.1       |
| [9c'' <sub>PB</sub> ] <sub>dis</sub>  | 1.667<br>(2.003) | -                | 2.592<br>(0.185) | 12.0       |
| [10c'' <sub>PB</sub> ] <sub>dis</sub> | 1.693<br>(1.882) | -                | 2.760<br>(0.164) | 22.7       |
| [11c'' <sub>PB</sub> ] <sub>dis</sub> | 1.904<br>(0.972) | -                | 2.518<br>(0.210) | 8.3        |
| [12c'' <sub>PB</sub> ]                | 1.944<br>(0.822) | -                | 2.649<br>(0.182) | 17.2       |
| [13c'' <sub>PB</sub> ]                | 2.279<br>(0.270) | -                | 2.528<br>(0.191) | 12.4       |
| [14c'' <sub>PB</sub> ]                | 2.280<br>(0.273) | -                | 2.562<br>(0.191) | 10.9       |

**Table S18:** Calculated (M06-L-D3(heptane)/6-311+G\*) reaction free energies (in kcal mol<sup>-1</sup>) for the protonation at the equatorial sulphur atom of the vanadium complex [**1f''**<sub>SB</sub>] at different stages of dinitrogen reduction process. The numbering are given as per Fig. S20.

| <b>Reaction</b>                                                | <b>Equatorial group</b> |
|----------------------------------------------------------------|-------------------------|
| [ <b>4f''</b> <sub>SB</sub> ] + H <sup>+</sup>                 | 22.1                    |
| [ <b>6f''</b> <sub>SB</sub> ] <sub>alt</sub> + H <sup>+</sup>  | 23.3                    |
| [ <b>6f''</b> <sub>SB</sub> ] <sub>dis</sub> + H <sup>+</sup>  | 16.4                    |
| [ <b>8f''</b> <sub>SB</sub> ] <sub>alt</sub> + H <sup>+</sup>  | 22.5                    |
| [ <b>8f''</b> ] <sub>dis</sub> + H <sup>+</sup>                | 27.0                    |
| [ <b>10f''</b> <sub>SB</sub> ] <sub>alt</sub> + H <sup>+</sup> | 11.1                    |
| [ <b>10f''</b> <sub>SB</sub> ] <sub>dis</sub> + H <sup>+</sup> | 23.2                    |
| [ <b>12f''</b> <sub>SB</sub> ] + H <sup>+</sup>                | 21.8                    |

**Table S19:** Calculated (M06-L-D3(heptane)/6-311+G\*) important geometrical parameters and pyramidalization angle (in degree) around the vanadium center of  $[5f''_{SB}]-[14f''_{SB}]$ . Bond lengths are in Å. Bond lengths are given in Å and WBI values are given within parenthesis.

| Molecules            | V-N              | N-N              | V-B              | $\theta_V$ |
|----------------------|------------------|------------------|------------------|------------|
| $[5f''_{SB}]_{alt}$  | 2.031<br>(0.558) | 1.280<br>(1.640) | 2.659<br>(0.218) | 14.7       |
| $[6f''_{SB}]_{alt}$  | 2.027<br>(0.605) | 1.314<br>(1.451) | 2.546<br>(0.222) | 8.4        |
| $[7f''_{SB}]_{alt}$  | 1.922<br>(0.933) | 1.396<br>(1.092) | 2.594<br>(0.230) | 11.8       |
| $[8f''_{SB}]_{alt}$  | 1.937<br>(0.878) | 1.443<br>(1.030) | 2.565<br>(0.222) | 10.0       |
| $[9f''_{SB}]_{alt}$  | 2.267<br>(0.298) | 1.443<br>(1.032) | 2.443<br>(0.258) | 5.0        |
| $[10f''_{SB}]_{alt}$ | 2.255<br>(0.284) | 1.446<br>(1.028) | 2.466<br>(0.228) | 4.3        |
| $[11f''_{SB}]_{alt}$ | 2.294<br>(0.260) | 1.467<br>(0.984) | 2.453<br>(0.245) | 4.5        |
| $[5f''_{SB}]_{dis}$  | 1.713<br>(1.751) | 1.323<br>(1.221) | 3.252<br>(0.072) | 40.4       |
| $[6f''_{SB}]_{dis}$  | 1.705<br>(1.850) | 1.359<br>(1.128) | 2.667<br>(0.212) | 14.5       |
| $[7f''_{SB}]_{dis}$  | 1.743<br>(1.665) | 1.410<br>(1.011) | 2.823<br>(0.193) | 20.5       |
| $[8f''_{SB}]_{dis}$  | 1.575<br>(2.871) | -                | 2.570<br>(0.232) | 12.0       |
| $[9f''_{SB}]_{dis}$  | 1.670<br>(2.125) | -                | 2.590<br>(0.194) | 10.3       |
| $[10f''_{SB}]_{dis}$ | 1.692<br>(2.027) | -                | 2.710<br>(0.208) | 15.2       |
| $[11f''_{SB}]_{dis}$ | 1.876<br>(1.080) | -                | 2.461<br>(0.261) | 5.9        |
| $[12f''_{SB}]$       | 1.948<br>(0.898) | -                | 2.541<br>(0.226) | 10.7       |
| $[13f''_{SB}]$       | 2.259<br>(0.322) | -                | 2.444<br>(0.258) | 5.1        |
| $[14f''_{SB}]$       | 1.900<br>(0.424) | -                | 2.409<br>(0.229) | 4.3        |

**Table S20:** Energies (in hartree) of the complexes  $[5c''_{PB}]$ – $[14c''_{PB}]$  and  $[5f''_{SB}]$ – $[14f''_{SB}]$  in their different multiplicities at (M06-L-D3(heptane)/6-311+G\*) level of theory.

| <b>Molecules</b>     | <b>Possible multiplicities</b> | <b>Energies</b> | <b>Molecules</b>     | <b>Possible multiplicities</b> | <b>Energies</b> |
|----------------------|--------------------------------|-----------------|----------------------|--------------------------------|-----------------|
| $[5c''_{PB}]_{alt}$  | Quintet                        | -3507.096581    | $[5f''_{SB}]_{alt}$  | Quintet                        | -3322.249460    |
|                      | Triplet                        | -3507.084563    |                      | Triplet                        | -3322.234034    |
|                      | Singlet                        | -3507.064827    |                      | Singlet                        | -3322.226199    |
| $[5c''_{PB}]_{dis}$  | Quintet                        | -3507.096581    | $[5f''_{SB}]_{dis}$  | Quintet                        | -3322.243435    |
|                      | Triplet                        | -3507.115363    |                      | Triplet                        | -3322.260350    |
|                      | Singlet                        | -3507.092500    |                      | Singlet                        | -3322.238202    |
| $[6c''_{PB}]_{alt}$  | Sextet                         | -3507.237814    | $[6f''_{SB}]_{alt}$  | Sextet                         | -3322.393810    |
|                      | Quartet                        | -3507.233562    |                      | Quartet                        | -3322.389916    |
|                      | Doublet                        | -3507.230831    |                      | Doublet                        | *               |
| $[6c''_{PB}]_{dis}$  | Quartet                        | -3507.269012    | $[6f''_{SB}]_{dis}$  | Quartet                        | -3322.418409    |
|                      | Doublet                        | -3507.259937    |                      | Doublet                        | *               |
| $[7c''_{PB}]_{alt}$  | Sextet                         | -3507.667447    | $[7f''_{SB}]_{alt}$  | Sextet                         | -3322.825538    |
|                      | Quartet                        | -3507.697773    |                      | Quartet                        | -3322.850322    |
|                      | Doublet                        | -3507.684093    |                      | Doublet                        | -3322.837823    |
| $[7c''_{PB}]_{dis}$  | Quartet                        | -3507.669748    | $[7f''_{SB}]_{dis}$  | Quartet                        | -3322.818914    |
|                      | Doublet                        | -3507.656451    |                      | Doublet                        | *               |
| $[8c''_{PB}]_{alt}$  | Quintet                        | -3507.842418    | $[8f''_{SB}]_{alt}$  | Quintet                        | -3322.999688    |
|                      | Triplet                        | -3507.833559    |                      | Triplet                        | -3322.996170    |
|                      | Singlet                        | -3507.801856    |                      | Singlet                        | -3322.964305    |
| $[8c''_{PB}]_{dis}$  | Triplet                        | -3451.334767    | $[8f''_{SB}]_{dis}$  | Triplet                        | -3266.488000    |
|                      | Singlet                        | -3451.323430    |                      | Singlet                        | -3266.472184    |
| $[9c''_{PB}]_{alt}$  | Quintet                        | -3508.283230    | $[9f''_{SB}]_{alt}$  | Quintet                        | -3323.442488    |
|                      | Triplet                        | -3508.270490    |                      | Triplet                        | -3323.435223    |
|                      | Singlet                        | -3508.225090    |                      | Singlet                        | -3323.390517    |
| $[9c''_{PB}]_{dis}$  | Triplet                        | -3451.783734    | $[9f''_{SB}]_{dis}$  | Triplet                        | -3266.933760    |
|                      | Singlet                        | -3451.764701    |                      | Singlet                        | -3266.907792    |
| $[10c''_{PB}]_{alt}$ | Sextet                         | -3508.414634    | $[10f''_{SB}]_{alt}$ | Sextet                         | -3323.566068    |
|                      | Quartet                        | -3508.402604    |                      | Quartet                        | -3323.553859    |
|                      | Doublet                        | -3508.376446    |                      | Doublet                        | -3323.534133    |
| $[10c''_{PB}]_{dis}$ | Quartet                        | -3451.944309    | $[10f''_{SB}]_{dis}$ | Quartet                        | -3267.093000    |



|                                           |         |              |                                           |         |              |
|-------------------------------------------|---------|--------------|-------------------------------------------|---------|--------------|
|                                           | Doublet | -3451.934595 |                                           | Doublet | -3267.084615 |
| <b>[11c''<sub>PB</sub>]<sub>alt</sub></b> | Sextet  | -3508.790101 | <b>[11f''<sub>SB</sub>]<sub>alt</sub></b> | Sextet  | -3323.941554 |
|                                           | Quartet | -3508.775507 |                                           | Quartet | *            |
|                                           | Doublet | *            |                                           | Doublet | *            |
| <b>[11c''<sub>PB</sub>]<sub>dis</sub></b> | Quartet | -3452.390430 | <b>[11f''<sub>SB</sub>]<sub>dis</sub></b> | Quartet | -3267.535660 |
|                                           | Doublet | -3452.373403 |                                           | Doublet | -3267.531863 |
| <b>[12c''<sub>PB</sub>]</b>               | Quintet | -3452.541427 | <b>[12f''<sub>SB</sub>]</b>               | Quintet | -3267.691925 |
|                                           | Triplet | -3452.530414 |                                           | Triplet | *            |
|                                           | Singlet | -3452.503971 |                                           | Singlet | -3267.655291 |
| <b>[13c''<sub>PB</sub>]</b>               | Quintet | -3452.987807 | <b>[13f''<sub>SB</sub>]</b>               | Quintet | -3268.143326 |
|                                           | Triplet | -3452.974157 |                                           | Triplet | -3268.138992 |
|                                           | Singlet | -3452.935250 |                                           | Singlet | -3268.092015 |
| <b>[14c''<sub>PB</sub>]</b>               | Sextet  | -3453.112714 | <b>[14f''<sub>SB</sub>]</b>               | Sextet  | -3268.265203 |
|                                           | Quartet | -3453.099904 |                                           | Quartet | -3268.253042 |
|                                           | Doublet | -3453.075856 |                                           | Doublet | -3268.233216 |
| * Broken geometry                         |         |              |                                           |         |              |

**Table S21:** Difference between the ideal spin and calculated spin (spin contamination) of the parent complexes in their different spin states at (M06-L-D3(heptane)/6-311+G\*) level of theory.

| Molecules                              | S   | Ideal spin<br>S(S+1) | Calculated Value<br><S <sup>2</sup> > | Difference between<br><S <sup>2</sup> > and S(S+1) |
|----------------------------------------|-----|----------------------|---------------------------------------|----------------------------------------------------|
| [1c'' <sub>PB</sub> ]                  | 5/2 | 8.75                 | 8.750                                 | 0.0                                                |
|                                        | 3/2 | 3.75                 | 3.753                                 | 0.003                                              |
|                                        | 1/2 | 0.75                 | 0.824                                 | 0.074                                              |
| [2c'' <sub>PB</sub> ]                  | 5/2 | 8.75                 | 8.751                                 | 0.001                                              |
|                                        | 3/2 | 3.75                 | 3.753                                 | 0.003                                              |
|                                        | 1/2 | 0.75                 | 0.974                                 | 0.224                                              |
| [3c'' <sub>PB</sub> ]                  | 3/2 | 3.75                 | 3.7569                                | 0.0069                                             |
|                                        | 1/2 | 0.75                 | 0.8448                                | 0.0948                                             |
| [4c'' <sub>PB</sub> ]                  | 2   | 6                    | 6.0041                                | 0.0041                                             |
|                                        | 1   | 2                    | 2.0472                                | 0.0472                                             |
| [5c'' <sub>PB</sub> ] <sub>sym</sub>   | 2   | 6                    | 6.0011                                | 0.0011                                             |
|                                        | 1   | 2                    | 2.0392                                | 0.0392                                             |
| [5c'' <sub>PB</sub> ] <sub>asym</sub>  | 2   | 6                    | 6.0011                                | 0.0011                                             |
|                                        | 1   | 2                    | 2.0095                                | 0.0095                                             |
| [6c'' <sub>PB</sub> ] <sub>sym</sub>   | 5/2 | 8.75                 | 8.7510                                | 0.010                                              |
|                                        | 3/2 | 3.75                 | 3.7662                                | 0.016                                              |
|                                        | 1/2 | 0.75                 | 0.975                                 | 0.225                                              |
| [6c'' <sub>PB</sub> ] <sub>asym</sub>  | 3/2 | 3.75                 | 3.7562                                | 0.0062                                             |
|                                        | 1/2 | 0.75                 | 0.9397                                | 0.1897                                             |
| [7c'' <sub>PB</sub> ] <sub>sym</sub>   | 5/2 | 8.75                 | 8.7505                                | 0.0005                                             |
|                                        | 3/2 | 3.75                 | 3.7570                                | 0.0070                                             |
|                                        | 1/2 | 0.75                 | 1.2772                                | 0.5272                                             |
| [7c'' <sub>PB</sub> ] <sub>asym</sub>  | 3/2 | 3.75                 | 3.7529                                | 0.0029                                             |
|                                        | 1/2 | 0.75                 | 0.8132                                | 0.0632                                             |
| [8c'' <sub>PB</sub> ] <sub>sym</sub>   | 2   | 6                    | 6.0036                                | 0.0036                                             |
|                                        | 1   | 2                    | 2.0418                                | 0.0418                                             |
| [8c'' <sub>PB</sub> ] <sub>asym</sub>  | 1   | 2                    | 2.0025                                | 0.0025                                             |
| [9c'' <sub>PB</sub> ] <sub>sym</sub>   | 2   | 6                    | 6.0006                                | 0.0006                                             |
|                                        | 1   | 2                    | 2.0401                                | 0.0401                                             |
| [9c'' <sub>PB</sub> ] <sub>asym</sub>  | 1   | 2                    | 2.0053                                | 0.0053                                             |
| [10c'' <sub>PB</sub> ] <sub>sym</sub>  | 5/2 | 8.75                 | 8.7507                                | 0.0007                                             |
|                                        | 3/2 | 3.75                 | 3.8176                                | 0.0676                                             |
|                                        | 1/2 | 0.75                 | 3.1638                                | 2.41                                               |
| [10c'' <sub>PB</sub> ] <sub>asym</sub> | 3/2 | 3.75                 | 3.7543                                | 0.0043                                             |
|                                        | 1/2 | 0.75                 | 1.0078                                | 0.2578                                             |
| [11c'' <sub>PB</sub> ] <sub>sym</sub>  | 5/2 | 8.75                 | 8.7507                                | 0.0007                                             |
|                                        | 3/2 | 3.75                 | 3.8193                                | 0.0693                                             |

|                                        |     |      |        |        |
|----------------------------------------|-----|------|--------|--------|
|                                        | 1/2 | 0.75 | *      | *      |
| [11c'' <sub>PB</sub> ] <sub>asym</sub> | 3/2 | 3.75 | 3.7521 | 0.0021 |
|                                        | 1/2 | 0.75 | 0.9091 | 0.1591 |
| [12c'' <sub>PB</sub> ]                 | 2   | 6    | 6.0013 | 0.0013 |
|                                        | 1   | 2    | 2.0862 | 0.0862 |
| [13c'' <sub>PB</sub> ]                 | 2   | 6    | 6.0004 | 0.004  |
|                                        | 1   | 2    | 2.0219 | 0.0219 |
| [14c'' <sub>PB</sub> ]                 | 5/2 | 8.75 | 8.7506 | 0.0006 |
|                                        | 3/2 | 3.75 | 3.8118 | 0.0618 |
|                                        | 1/2 | 0.75 | 1.9649 | 1.2149 |
| [1f'' <sub>SB</sub> ]                  | 5/2 | 8.75 | 8.750  | 0.0    |
|                                        | 3/2 | 3.75 | 3.751  | 0.001  |
|                                        | 1/2 | 0.75 | 0.782  | 0.032  |
| [2f'' <sub>SB</sub> ]                  | 5/2 | 8.75 | 8.750  | 0.0    |
|                                        | 3/2 | 3.75 | 3.751  | 0.001  |
|                                        | 1/2 | 0.75 | 0.895  | 0.145  |
| [3f'' <sub>SB</sub> ]                  | 3/2 | 3.75 | 3.7576 | 0.0076 |
|                                        | 1/2 | 0.75 | 0.9802 | 0.2302 |
| [4f'' <sub>SB</sub> ]                  | 2   | 6    | 6.0041 | 0.0041 |
|                                        | 1   | 2    | 2.0376 | 0.0376 |
| [5f'' <sub>SB</sub> ] <sub>sym</sub>   | 2   | 6    | 6.0009 | 0.0009 |
|                                        | 1   | 2    | 2.0175 | 0.0175 |
| [5f'' <sub>SB</sub> ] <sub>asym</sub>  | 2   | 6    | 6.0008 | 0.008  |
|                                        | 1   | 2    | 2.0095 | 0.0095 |
| [6f'' <sub>SB</sub> ] <sub>sym</sub>   | 5/2 | 8.75 | 8.7500 | 0.0    |
|                                        | 3/2 | 3.75 | 3.7660 | 0.016  |
|                                        | 1/2 | 0.75 | *      | *      |
| [6f'' <sub>SB</sub> ] <sub>asym</sub>  | 3/2 | 3.75 | 3.7556 | 0.0056 |
|                                        | 1/2 | 0.75 | *      | *      |
| [7f'' <sub>SB</sub> ] <sub>sym</sub>   | 5/2 | 8.75 | 8.7503 | 0.0003 |
|                                        | 3/2 | 3.75 | 3.7564 | 0.0064 |
|                                        | 1/2 | 0.75 | 1.3219 | 0.5719 |
| [7f'' <sub>SB</sub> ] <sub>asym</sub>  | 3/2 | 3.75 | 3.7521 | 0.0021 |
|                                        | 1/2 | 0.75 | 0.7538 | 0.0038 |
| [8f'' <sub>SB</sub> ] <sub>sym</sub>   | 2   | 6    | 6.0009 | 0.0009 |
|                                        | 1   | 2    | 2.0089 | 0.0089 |
| [8f'' <sub>SB</sub> ] <sub>asym</sub>  | 1   | 2    | 2.0022 | 0.0022 |
| [9f'' <sub>SB</sub> ] <sub>sym</sub>   | 2   | 6    | 6.0003 | 0.0003 |
|                                        | 1   | 2    | 2.0133 | 0.0133 |

|                              |     |      |        |        |
|------------------------------|-----|------|--------|--------|
| $[9f''_{SB}]_{\text{asym}}$  | 1   | 2    | 2.0047 | 0.0047 |
| $[10f''_{SB}]_{\text{sym}}$  | 5/2 | 8.75 | 8.7504 | 0.0004 |
|                              | 3/2 | 3.75 | 3.7977 | 0.0477 |
|                              | 1/2 | 0.75 | 0.9837 | 0.2337 |
| $[10f''_{SB}]_{\text{asym}}$ | 3/2 | 3.75 | 3.7535 | 0.0035 |
|                              | 1/2 | 0.75 | 0.9988 | 0.2488 |
| $[11f''_{SB}]_{\text{sym}}$  | 5/2 | 8.75 | 8.7504 | 0.0004 |
|                              | 3/2 | 3.75 | *      | *      |
|                              | 1/2 | 0.75 | *      | *      |
| $[11f''_{SB}]_{\text{asym}}$ | 3/2 | 3.75 | 3.7509 | 0.0009 |
|                              | 1/2 | 0.75 | 0.8241 | 0.0741 |
| $[12f''_{SB}]$               | 2   | 6    | 6.0006 | 0.0006 |
|                              | 1   | 2    | *      | *      |
| $[13f''_{SB}]$               | 2   | 6    | 6.0003 | 0.0003 |
|                              | 1   | 2    | 2.0110 | 0.0110 |
| $[14f''_{SB}]$               | 5/2 | 8.75 | 8.7503 | 0.0003 |
|                              | 3/2 | 3.75 | 3.7954 | 0.0454 |
|                              | 1/2 | 0.75 | 0.9518 | 0.2018 |
| * Broken geometry            |     |      |        |        |



| Geometrical parameters | Calculated values | Experimental values | difference |
|------------------------|-------------------|---------------------|------------|
| V-N <sub>eq</sub>      | 1.955             | 1.972               | 0.017      |
| V-N <sub>eq</sub>      | 1.957             | 1.989               | 0.032      |
| V-N <sub>eq</sub>      | 1.952             | 1.975               | 0.023      |
| V-N <sub>ax</sub>      | 2.148             | 2.200               | 0.052      |
| V-NH <sub>3</sub>      | 2.162             | 2.215               | 0.053      |



| Geometrical parameters | Calculated values | Experimental value | difference |
|------------------------|-------------------|--------------------|------------|
| V-N                    | 2.055             | 2.038              | 0.017      |
| V-P                    | 2.561             | 2.587              | 0.026      |
| V-P                    | 2.529             | 2.538              | 0.009      |
| V-O                    | 1.926             | 1.905              | 0.021      |

(a)



|                     | $\nu(\text{N-N})$ | $\nu(\text{N-N})$ |
|---------------------|-------------------|-------------------|
| <b>Experimental</b> | 1918.0            | 2011.0            |
| <b>Computed</b>     | 2005.5            | 2093.9            |

(b)

**Fig. S1.** Comparison of (a) the available X-ray data and our calculated (M06-L-D3(heptane)/6-311+G\*) values of the important geometrical parameters (Bond lengths are given in Å) and (b) the available IR frequencies (in  $\text{cm}^{-1}$ ) of some of the important bonds for the experimentally known complexes.



(a) Side view

(b) Top view

**Fig. S2.** Optimized geometry of a representative vanadium complex ( $\text{E} = \text{P}^i\text{Pr}_2$  and  $\text{X} = \text{Si}$ ) in two different orientations: (a) side view and (b) top view.



**Fig. S3.** Pictorial representation of the molecular orbital showing the lone pairs situated at the sulphur atoms of the dinitrogen vanadium complexes [2d'sc]-[2f'sb] and [2d''sc]-[2f''sb]. The hydrogen atoms of the methyl groups are omitted for the sake of clarity.

The reaction free energies obtained for protonation at the equatorial sulfur atom of [2d'sc]-[2f'sb] and [2d''sc]-[2f''sb] were substantially endergonic (16.9-22.2 kcal mol<sup>-1</sup>, Table S10†). This may be attributed to the higher stability of the lone pair at the sulfur atoms (Fig. S3†).



**Fig. S4.** Pictorial representation of the HOMO for the dinitrogen vanadium complexes  $[2a'_{PC}]$ - $[2f'_{SB}]$  and  $[2a''_{PC}]$ - $[2f''_{SB}]$ . Hydrogen atoms of the methyl groups are omitted for clarity.



**Fig. S5.** Optimized geometries of the transition state (TS1) involved in the formation of the  $\eta^2$ -intermediate from the metal protonated species  $[3\text{-V-H}]^+$  for  $[1\mathbf{a}'_{\text{PC}}]$ - $[1\mathbf{f}'_{\text{SB}}]$  at M06-L-D3(heptane)/6-311+G\* level of theory. Hydrogen atoms of the methyl groups are omitted for clarity. Bond lengths are given in Å.





**Fig. S6.** Optimized geometries of the  $\eta^2$ -intermediate involved in the formation of **[3]** from the metal protonated species **[3-V-H]<sup>+</sup>** for **[1a'PC]-[1f'SB]** at M06-L-D3(heptane)/6-311+G\* level of theory. Hydrogen atoms of the methyl groups are omitted for clarity. Bond lengths are given in Å.



**Fig. S7.** Optimized geometries of the transition state (TS2) involved in the formation of **[3]** from the  $\eta^2$ -intermediate of **[1a'<sub>PC</sub>]-[1f'<sub>sB</sub>]** at M06-L-D3(heptane)/6-311+G\* level of theory. Hydrogen atoms of the methyl groups are omitted for clarity. Bond lengths are given in Å.



**Fig. S8.** Optimized geometries of the transition state (TS1) involved in the formation of the  $\eta^2$ -intermediate from the metal protonated species  $[3-V-H]^+$  of  $[1a''_{PC}]$ - $[1f''_{SB}]$  at M06-L-D3(heptane)/6-311+G\* level of theory. Hydrogen atoms of the methyl groups are omitted for clarity. Bond lengths are given in Å.



**Fig. S9.** Optimized geometries of the  $\eta^2$ -intermediate involved in the formation of **[3]** from the metal protonated species **[3-V-H]<sup>+</sup>** of **[1a''<sub>PC</sub>]-[1f''<sub>SB</sub>]** at M06-L-D3(heptane)/6-311+G\* level of theory. Hydrogen atoms of the methyl groups are omitted for clarity. Bond lengths are given in Å.



**Fig. S10.** Optimized geometries of the transition state (TS2) involved in the formation of the  $\eta^2$ -intermediate from the metal protonated species  $[3-V-H]^+$  of  $[1a''_{PC}]-[1f''_{SB}]$  at M06-L-D3(heptane)/6-311+G\* level of theory. Hydrogen atoms of the methyl groups are omitted for clarity. Bond lengths are given in Å.



**Fig. S11.** Optimized geometries of the TS (TS3) involved during conversion of [4]→[5]<sub>alt</sub> in all possible spin states for the molecules (a) [1c''<sub>PB</sub>] and (b) [1f''<sub>SB</sub>] at M06-L-D3(heptane)/6-311+G\* level of theory. Total energy (T.E) values are given in hartree. The values given within parenthesis correspond to the relative energy difference (in kcal mol<sup>-1</sup>) between the TSs. Hydrogen atoms of the methyl groups are omitted for clarity. Bond lengths are given in Å.



**Fig. S12.** Schematic representation of the possible proton-catalyzed pathway involved in the conversion of [5]<sub>alt</sub>, [6]<sub>alt</sub> and [7]<sub>alt</sub> to [5]<sub>dis</sub>, [6]<sub>dis</sub> and [7]<sub>dis</sub>, respectively.



**Fig. S13.** Optimized geometries of the TSs involved in the conversion of  $[5c''_{PB}]_{alt}$ ,  $[6c''_{PB}]_{alt}$  and  $[7c''_{PB}]_{alt}$  to  $[5c''_{PB}]_{dis}$ ,  $[6c''_{PB}]_{dis}$  and  $[7c''_{PB}]_{dis}$  respectively via proton transfer pathway at M06-L-D3(heptane)/6-311+G\* level of theory. The hydrogen atoms of the methyl groups are omitted for clarity.





**Fig. S14.** Optimized geometries of the TS (TS5) involved during conversion of  $[5]_{alt} \rightarrow [5]_{dis}$  in all possible spin states for the molecules (a)  $[1c''_{PB}]$  and (b)  $[1f''_{SB}]$  at M06-L-D3(heptane)/6-311+G\* level of theory. Total energy (T.E) values are given in hartree. The values given within parenthesis correspond to the relative energy difference (in kcal mol<sup>-1</sup>) between the TSs. Hydrogen atoms of the methyl groups are omitted for clarity. Bond lengths are given in Å.



T.E. = -3507.183455  
 S = 3/2  
 (0.0)



T.E. = -3507.149524  
 S = 5/2  
 (21.3)

(a)  $[\text{TS6}]_{\text{alt} \rightarrow \text{dis}}^{\text{C}''_{\text{PB}}}$



T.E. = -3322.331928  
 S = 3/2  
 (0.0)



T.E. = -3322.304097  
 S = 5/2  
 (17.4)

(b)  $[\text{TS6}]_{\text{alt} \rightarrow \text{dis}}^{\text{f}''_{\text{SB}}}$

**Fig. S15.** Optimized geometries of the TS (TS6) involved during conversion of  $[\mathbf{6}]_{\text{alt}} \rightarrow [\mathbf{6}]_{\text{dis}}$  in all possible spin states for the molecules (a)  $[\mathbf{1c}''_{\text{PB}}]$  and (b)  $[\mathbf{1f}''_{\text{SB}}]$  at M06-L-D3(heptane)/6-311+G\* level of theory. Total energy (T.E) values are given in hartree. The values given within parenthesis correspond to the relative energy difference (in kcal mol<sup>-1</sup>) between the TSs. Hydrogen atoms of the methyl groups are omitted for clarity. Bond lengths are given in Å.



T.E. = -3507.617766  
S = 3/2

(a)  $[\text{TS7}]_{\text{alt} \rightarrow \text{dis}}^{\text{c}''_{\text{PB}}}$



T.E. = -3322.770321  
S = 3/2

(b)  $[\text{TS7}]_{\text{alt} \rightarrow \text{dis}}^{\text{f}''_{\text{SB}}}$

**Fig. S16.** Optimized geometries of the TS (TS7) involved during conversion of  $[7]_{\text{alt}} \rightarrow [7]_{\text{dis}}$  in all possible spin states for the molecules (a)  $[1\text{c}''_{\text{PB}}]$  and (b)  $[1\text{f}''_{\text{SB}}]$  at M06-L-D3(heptane)/6-311+G\* level of theory. Total energy (T.E) values are given in hartree. Hydrogen atoms of the methyl groups are omitted for clarity. Bond lengths are given in Å.



HOMO-13  
 $E_{\text{LP}} = -6.7 \text{ eV}$   
 $[10\text{c}''_{\text{PB}}]_{\text{alt}}$



HOMO-14  
 $E_{\text{LP}} = -6.7 \text{ eV}$   
 $[10\text{f}''_{\text{SB}}]_{\text{alt}}$

**Fig. S17.** Molecular orbital showing the presence of amino lone pair on the  $\beta$ -nitrogen atom of the complexes  $[10\text{c}''_{\text{PB}}]_{\text{alt}}$  and  $[10\text{f}''_{\text{SB}}]_{\text{alt}}$ . The hydrogen atoms of the methyl groups are omitted for the sake of clarity.



**HOMO**  
 $E_{LP} = -3.5 \text{ eV}$

**[8c''<sub>PB</sub>]<sub>dis</sub>**



**HOMO**  
 $E_{LP} = -3.6 \text{ eV}$

**[8f''<sub>SB</sub>]<sub>dis</sub>**

**Fig. S18.** Molecular orbital showing the presence of lone pair on the nitrogen atom of the complexes [8c''<sub>PB</sub>]<sub>dis</sub> and [8f''<sub>SB</sub>]<sub>dis</sub>. The hydrogen atoms of the methyl groups are omitted for the sake of clarity.



T.E. = -3507.662111  
 S=1/2  
 (4.0)



T.E. = -3507.668505  
 S=3/2  
 (0.0)

(a)



T.E. = -3322.822926  
 S=1/2  
 (0.0)



T.E. = -3322.822176  
 S=3/2  
 (0.5)

(b)

**Fig. S19.** Optimized geometries of the TS (TS<sub>hyb</sub>) involved during conversion of [6]<sub>dis</sub>→[7]<sub>alt</sub> in all possible spin states for the molecules (a) [1c''<sub>PB</sub>] and (b) [1f''<sub>SB</sub>] at M06-L-D3(heptane)/6-311+G\* level of theory. Total energy (T.E) values are given in hartree. The values given within parenthesis correspond to the relative energy difference (in kcal mol<sup>-1</sup>) between the TSs. Hydrogen atoms of the methyl groups are omitted for clarity. Bond lengths are given in Å.



**Fig. S20.** Energy profile diagram for the reduction process of N<sub>2</sub> to NH<sub>3</sub> mediated by the catalyst [1f''<sub>SB</sub>]. The energy values are given in kcal mol<sup>-1</sup> and calculated at M06-L-D3(heptane)/6-311+G\* level of theory. The superscript outside the bracket indicate the spin state of the species.

### Generation of $[5f''_{SB}]_{alt}$ and $[5f''_{SB}]_{dis}$ for the catalyst $[1f''_{SB}]$

Protonation at the  $N_\alpha$  or  $N_\beta$  atoms of the diazenido complex  $[4f''_{SB}]$ , yielded the cationic complexes  $[5f''_{SB}]_{alt}$  (in a quintet ground state) and  $[5f''_{SB}]_{dis}$  (in a triplet ground state) respectively (Fig. S20†). Both of these complexes exhibit a TBP geometry around the vanadium center. The calculated reaction free energies obtained for the formation of  $[5f''_{SB}]_{alt}$  and  $[5f''_{SB}]_{dis}$  from the neutral diazenido complex  $[4f''_{SB}]$  are considerably exergonic and found to be relatively more exergonic for the distal pathway (Fig. S21 and Fig. S22†). In addition, we have also calculated the reaction free energy for protonation at the metal center of the diazenido complex  $[4f''_{SB}]$ . This reaction is found to be exergonic in nature ( $-13.8 \text{ kcal mol}^{-1}$ ) indicating its possibility during the nitrogen reduction process. However, protonation at the sulphur atom of  $[4f''_{SB}]$  is computed to be considerably endergonic ( $22.1 \text{ kcal mol}^{-1}$ , Table S18†) which may be attributed to the higher stability of the sulphur lone pair (HOMO-13,  $E_{LP} = -6.9 \text{ eV}$ , Fig. S23†). Furthermore, we have also investigated the activation energy barrier associated with the formation of the cationic species  $[5f''_{SB}]_{alt}$  and  $[5f''_{SB}]_{dis}$ , from the diazenido complex  $[4f''_{SB}]$  by locating the probable TSs. The reaction profile diagram for the conversion of  $[4f''_{SB}]$  to  $[5f''_{SB}]_{alt}$  via the alternating pathway is shown in Fig. S21†. The first step involves the formation of a metal protonated species  $[4f''_{SB} -V-H]^+$  which lie  $-13.8 \text{ kcal mol}^{-1}$  lower in energy than the starting diazenido complex. Thereafter, the metal protonated species passes through a TS ( $TS3_{alt}$ ) with an activation barrier of  $17.5 \text{ kcal mol}^{-1}$  to generate  $[5f''_{SB}]_{alt}$ . However, unlike the alternating pathway, two intermediates and two TSs are possible for the transformation of  $[4f''_{SB}]$

to  $[5f''_{SB}]_{dis}$  via the distal pathway (Fig. S22<sup>†</sup>). The first intermediate, i.e., the metal protonated species  $[4f''_{SB}-V-H]^+$  is common for both the pathways that rearranges via a TS ( $TS4'_{dis}$ ) with



**Fig. S21.** Reaction profile diagram for the conversion of  $[4f''_{SB}]$  to  $[5f''_{SB}]_{alt}$  via alternating pathway at M06-L-D3(heptane)/6-311+G\* level of theory. Hydrogen atoms of the methyl groups are omitted for clarity. The energy values are in kcal mol<sup>-1</sup>.



**Fig. S22.** Reaction profile diagram for the conversion of  $[4f''_{SB}]$  to  $[5f''_{SB}]_{dis}$  via distal pathway at M06-L-D3(heptane)/6-311+G\* level of theory. Hydrogen atoms of the methyl groups are omitted for clarity. The energy values are in kcal mol<sup>-1</sup>.



an activation barrier 11.7 kcal mol<sup>-1</sup> to generate an intermediate in which the metal center is bounded to the two N atoms in  $\eta^2$  fashion ( $\eta^2_{\text{NN}}\text{-[4f''}_{\text{SB}}\text{-V-H}]^+$ ). Finally,  $\eta^2_{\text{NN}}\text{-[4f''}_{\text{SB}}\text{-V-H}]^+$  proceeds through another TS (TS4''<sub>dis</sub>) in which the metal bound proton migrates to the  $\beta$ -nitrogen atom to yield [5f''<sub>SB</sub>]<sub>dis</sub>. The barrier height associated with this transformation is computed to be 21.2 kcal mol<sup>-1</sup>. Since the transformations [4f''<sub>SB</sub>] $\rightarrow$ [5f''<sub>SB</sub>]<sub>dis</sub> and [4f''<sub>SB</sub>] $\rightarrow$ [5f''<sub>SB</sub>]<sub>alt</sub> involves comparable barriers therefore, both pathways may be viable.



**HOMO-13**  
 **$E_{\text{LP}} = -6.9 \text{ eV}$**   
**[4f''<sub>SB</sub>]**

**Fig. S23.** Pictorial representation of the molecular orbital showing the lone pairs situated at the sulphur atoms of the complex [4f''<sub>SB</sub>]. The hydrogen atoms of the methyl groups are omitted for the sake of clarity.



**Fig. S24.** Optimized geometries of the TSs involved in the conversion of  $[5f''_{SB}]_{alt}$ ,  $[6f''_{SB}]_{alt}$  and  $[7f''_{SB}]_{alt}$  to  $[5f''_{SB}]_{dis}$ ,  $[6f''_{SB}]_{dis}$  and  $[7f''_{SB}]_{dis}$  respectively via proton transfer pathway at M06-L-D3(heptane)/6-311+G\* level of theory. The hydrogen atoms of the methyl groups are omitted for clarity.

### Hybrid pathway for the catalyst $[1f''_{SB}]$

We have studied the kinetics of the transformation  $[6f''_{SB}]_{dis} \rightarrow [7f''_{SB}]_{alt}$  by locating the probable intermediate and TS (Fig. S25<sup>†</sup>). The first step involves the formation of a metal protonated species  $[6f''_{SB}-V-H]^+_{dis}$  which is computed to be exergonic in nature ( $-20.0 \text{ kcal mol}^{-1}$ ). Thereafter,  $[6f''_{SB}-V-H]^+_{dis}$  passes through a TS ( $TS_{hyb}$ ) with an activation barrier  $17.1 \text{ kcal mol}^{-1}$ .



**Fig. S25.** Reaction profile diagram for the conversion of  $[6f''_{SB}]_{dis} \rightarrow [7f''_{SB}]_{alt}$  via hybrid pathway at M06-L-D3(heptane)/6-311+G\* level of theory. Hydrogen atoms of the methyl groups are omitted for clarity. The energy values are in kcal mol<sup>-1</sup>.

mol<sup>-1</sup> to give  $[7\mathbf{f}''_{\text{SB}}]_{\text{alt}}$ . Since, the metal protonated species  $[6\mathbf{f}''_{\text{SB}} - \mathbf{V}-\mathbf{H}]_{\text{dis}}^+$  (doublet) and  $[7\mathbf{f}''_{\text{SB}}]_{\text{alt}}$  (quartet) exhibits different multiplicities, therefore, we attempted to locate the TS in both the spin states (doublet and quartet, Fig. S19†). However, the doublet and quartet states of TS<sub>hyb</sub> are isoenergetic (the energy difference between these states is only 0.5 kcal mol<sup>-1</sup>, Fig. S19†). Therefore, the activation barrier was computed by considering the quartet state TS. Thus, thermodynamic as well as kinetic studies suggest the viability of the hybrid pathway for the catalyst  $[1\mathbf{f}''_{\text{SB}}]$ .

Cartesian coordinates of  $[1a'_{PC}]-[1f'_{SB}]$ ,  $[1a''_{PC}]-[1f''_{SB}]$  and  $\{[HIPTN_3N]-V\}$ , along with their total energies (in hartree) including zero point vibrational correction at M06-L-D3(heptane)/6-311+G\* level of theory.

$[1a'_{PC}]$  (TE = -2952.517639)

|    |              |              |              |
|----|--------------|--------------|--------------|
| 6  | -0.031077000 | 2.443589000  | 1.770467000  |
| 6  | 0.562960000  | 1.186032000  | 2.395471000  |
| 6  | -2.608327000 | -0.016897000 | 1.500415000  |
| 6  | -1.427776000 | -0.353541000 | 2.414211000  |
| 6  | 2.255718000  | -1.351094000 | 1.684650000  |
| 6  | 0.878598000  | -1.274720000 | 2.343317000  |
| 1  | -2.690505000 | 1.065448000  | 1.332953000  |
| 1  | -1.568358000 | 0.187262000  | 3.370187000  |
| 1  | 2.839175000  | -2.208753000 | 2.048662000  |
| 1  | 1.022617000  | -1.231404000 | 3.444376000  |
| 1  | 0.362578000  | 3.362154000  | 2.225648000  |
| 1  | 1.652688000  | 1.215816000  | 2.239590000  |
| 6  | -0.764490000 | 3.819536000  | -0.734047000 |
| 1  | -0.140768000 | 4.262790000  | -1.525723000 |
| 6  | -2.654513000 | -2.586122000 | 0.154725000  |
| 1  | -1.904803000 | -2.759820000 | 0.943987000  |
| 6  | 3.694839000  | -0.579468000 | -0.731991000 |
| 1  | 3.478213000  | 0.474138000  | -0.496890000 |
| 23 | 0.010750000  | -0.053884000 | -0.415394000 |
| 6  | -0.009170000 | -0.125853000 | 1.842083000  |
| 1  | -1.117374000 | 2.468234000  | 1.924807000  |
| 1  | 0.433759000  | 1.244516000  | 3.496871000  |
| 1  | 0.357644000  | -2.225543000 | 2.164477000  |
| 1  | 2.848415000  | -0.461129000 | 1.932756000  |
| 1  | -1.534405000 | -1.413964000 | 2.691110000  |
| 1  | -3.560733000 | -0.329960000 | 1.951125000  |
| 6  | 4.993801000  | -0.932691000 | -0.014746000 |
| 1  | 5.766444000  | -0.191667000 | -0.252730000 |
| 1  | 4.884223000  | -0.940270000 | 1.073418000  |
| 1  | 5.393004000  | -1.904753000 | -0.309045000 |
| 6  | 3.829802000  | -0.688709000 | -2.244824000 |
| 1  | 4.056244000  | -1.713121000 | -2.561098000 |
| 1  | 2.910075000  | -0.387659000 | -2.759901000 |
| 1  | 4.638838000  | -0.052325000 | -2.621369000 |
| 6  | -4.017607000 | -2.983136000 | 0.703996000  |
| 1  | -4.013160000 | -4.028529000 | 1.035318000  |
| 1  | -4.322235000 | -2.376119000 | 1.561657000  |
| 1  | -4.801609000 | -2.900071000 | -0.056014000 |
| 6  | -2.260590000 | -3.457619000 | -1.034062000 |
| 1  | -3.024224000 | -3.454675000 | -1.816845000 |

|    |              |              |              |
|----|--------------|--------------|--------------|
| 1  | -1.320251000 | -3.124006000 | -1.488666000 |
| 1  | -2.125186000 | -4.500680000 | -0.725432000 |
| 6  | -2.037794000 | 3.285443000  | -1.376848000 |
| 1  | -1.831812000 | 2.520603000  | -2.132644000 |
| 1  | -2.690459000 | 2.823392000  | -0.625009000 |
| 1  | -2.612606000 | 4.088836000  | -1.852313000 |
| 6  | -1.110595000 | 4.905358000  | 0.279019000  |
| 1  | -0.239077000 | 5.314338000  | 0.793457000  |
| 1  | -1.623590000 | 5.741516000  | -0.210668000 |
| 1  | -1.790997000 | 4.525616000  | 1.048276000  |
| 6  | 2.226069000  | -3.197713000 | -0.609490000 |
| 1  | 1.936510000  | -3.225621000 | -1.671305000 |
| 6  | 1.184886000  | -3.980623000 | 0.183287000  |
| 1  | 1.488096000  | -4.088012000 | 1.230868000  |
| 1  | 0.205377000  | -3.494890000 | 0.174436000  |
| 1  | 1.063829000  | -4.991649000 | -0.221642000 |
| 6  | 3.589640000  | -3.858340000 | -0.461836000 |
| 1  | 3.513680000  | -4.937840000 | -0.640861000 |
| 1  | 4.328401000  | -3.471416000 | -1.166670000 |
| 1  | 3.997023000  | -3.733314000 | 0.547856000  |
| 6  | -3.825836000 | -0.119077000 | -1.150833000 |
| 1  | -3.455315000 | 0.856229000  | -1.494693000 |
| 6  | -5.105298000 | 0.136633000  | -0.363338000 |
| 1  | -5.527051000 | -0.777905000 | 0.062271000  |
| 1  | -4.954082000 | 0.840099000  | 0.459588000  |
| 1  | -5.873003000 | 0.568189000  | -1.017032000 |
| 6  | -4.096226000 | -0.959766000 | -2.392315000 |
| 1  | -4.571448000 | -1.913233000 | -2.140519000 |
| 1  | -4.778204000 | -0.438255000 | -3.073174000 |
| 1  | -3.183056000 | -1.186614000 | -2.952708000 |
| 6  | 2.015726000  | 3.067230000  | -0.201903000 |
| 1  | 2.584981000  | 2.363969000  | 0.426816000  |
| 6  | 2.265239000  | 4.479063000  | 0.305924000  |
| 1  | 3.334723000  | 4.719233000  | 0.275074000  |
| 1  | 1.758645000  | 5.226855000  | -0.314145000 |
| 1  | 1.935392000  | 4.623821000  | 1.338887000  |
| 6  | 2.499612000  | 2.912729000  | -1.638180000 |
| 1  | 3.570260000  | 3.131264000  | -1.726951000 |
| 1  | 2.334537000  | 1.897694000  | -2.015443000 |
| 1  | 1.979041000  | 3.602194000  | -2.314006000 |
| 15 | -2.356516000 | -0.761739000 | -0.174269000 |
| 15 | 0.267830000  | 2.398743000  | -0.052804000 |
| 15 | 2.091825000  | -1.373213000 | -0.159316000 |

[1b' <sub>psi</sub>] (TE = -3203.941560)

|    |              |              |              |
|----|--------------|--------------|--------------|
| 6  | 0.038342000  | 2.751433000  | 1.682851000  |
| 6  | 0.501329000  | 1.654749000  | 2.643103000  |
| 6  | -2.826066000 | -0.082332000 | 1.694883000  |
| 6  | -1.728244000 | -0.541260000 | 2.658476000  |
| 6  | 2.433928000  | -1.506224000 | 1.600634000  |
| 6  | 1.294320000  | -1.355138000 | 2.614081000  |
| 1  | -2.908807000 | 1.014544000  | 1.704490000  |
| 1  | -1.931257000 | -0.147477000 | 3.664798000  |
| 1  | 3.085040000  | -2.367397000 | 1.814942000  |
| 1  | 1.714628000  | -1.099884000 | 3.597493000  |
| 1  | 0.385401000  | 3.752113000  | 1.973169000  |
| 1  | 1.598105000  | 1.690264000  | 2.733670000  |
| 6  | -0.160640000 | 3.847065000  | -1.023823000 |
| 1  | 0.563788000  | 4.012419000  | -1.834873000 |
| 6  | -2.891493000 | -2.354580000 | -0.092848000 |
| 1  | -2.302831000 | -2.713434000 | 0.766107000  |
| 6  | 3.469611000  | -1.065971000 | -1.051114000 |
| 1  | 3.479641000  | 0.009891000  | -0.820654000 |
| 23 | -0.049890000 | -0.010795000 | -0.521552000 |
| 1  | -1.060074000 | 2.806665000  | 1.670282000  |
| 1  | 0.118880000  | 1.857805000  | 3.654006000  |
| 1  | 0.786430000  | -2.317345000 | 2.752682000  |
| 1  | 3.088652000  | -0.623387000 | 1.652868000  |
| 1  | -1.772459000 | -1.636045000 | 2.761025000  |
| 1  | -3.819237000 | -0.460733000 | 1.975950000  |
| 6  | 4.803705000  | -1.625013000 | -0.566794000 |
| 1  | 5.628084000  | -1.031424000 | -0.980652000 |
| 1  | 4.904010000  | -1.591684000 | 0.521448000  |
| 1  | 4.975327000  | -2.656100000 | -0.879907000 |
| 6  | 3.307891000  | -1.203221000 | -2.558382000 |
| 1  | 3.284544000  | -2.252825000 | -2.873242000 |
| 1  | 2.377932000  | -0.738615000 | -2.909628000 |
| 1  | 4.135554000  | -0.726597000 | -3.096304000 |
| 6  | -4.345943000 | -2.730178000 | 0.151906000  |
| 1  | -4.440321000 | -3.807100000 | 0.336319000  |
| 1  | -4.781471000 | -2.216939000 | 1.014206000  |
| 1  | -4.972049000 | -2.507363000 | -0.718217000 |
| 6  | -2.348934000 | -3.049642000 | -1.335953000 |
| 1  | -2.922003000 | -2.788505000 | -2.231746000 |
| 1  | -1.302974000 | -2.777941000 | -1.523253000 |
| 1  | -2.397219000 | -4.139990000 | -1.231416000 |
| 6  | -1.496386000 | 3.472023000  | -1.654983000 |
| 1  | -1.431474000 | 2.562117000  | -2.261598000 |
| 1  | -2.252502000 | 3.284707000  | -0.882454000 |

|    |              |              |              |
|----|--------------|--------------|--------------|
| 1  | -1.878602000 | 4.279681000  | -2.290352000 |
| 6  | -0.311127000 | 5.141712000  | -0.232565000 |
| 1  | 0.606066000  | 5.454966000  | 0.270007000  |
| 1  | -0.618724000 | 5.962488000  | -0.891374000 |
| 1  | -1.084894000 | 5.048764000  | 0.536504000  |
| 6  | 1.640293000  | -3.396110000 | -0.519072000 |
| 1  | 1.171127000  | -3.411923000 | -1.514781000 |
| 6  | 0.638205000  | -3.962975000 | 0.481701000  |
| 1  | 1.106727000  | -4.113221000 | 1.460352000  |
| 1  | -0.223911000 | -3.304404000 | 0.627960000  |
| 1  | 0.264376000  | -4.938715000 | 0.151344000  |
| 6  | 2.882964000  | -4.274010000 | -0.560310000 |
| 1  | 2.602012000  | -5.331052000 | -0.644972000 |
| 1  | 3.531883000  | -4.049383000 | -1.409354000 |
| 1  | 3.483836000  | -4.178848000 | 0.351041000  |
| 6  | -3.801878000 | 0.395332000  | -0.989932000 |
| 1  | -3.394898000 | 1.416772000  | -0.967320000 |
| 6  | -5.194687000 | 0.459764000  | -0.373978000 |
| 1  | -5.717016000 | -0.498644000 | -0.405553000 |
| 1  | -5.178573000 | 0.791442000  | 0.667392000  |
| 1  | -5.815722000 | 1.175551000  | -0.926395000 |
| 6  | -3.856487000 | -0.036111000 | -2.449391000 |
| 1  | -4.317351000 | -1.023560000 | -2.561935000 |
| 1  | -4.453401000 | 0.661557000  | -3.047734000 |
| 1  | -2.859347000 | -0.088170000 | -2.902580000 |
| 6  | 2.380961000  | 2.685468000  | -0.064107000 |
| 1  | 2.747053000  | 1.815883000  | 0.505229000  |
| 6  | 2.889483000  | 3.947683000  | 0.616764000  |
| 1  | 3.983364000  | 3.929748000  | 0.692118000  |
| 1  | 2.632817000  | 4.847144000  | 0.048090000  |
| 1  | 2.501654000  | 4.071509000  | 1.631617000  |
| 6  | 2.931251000  | 2.578358000  | -1.481663000 |
| 1  | 4.024371000  | 2.495993000  | -1.480089000 |
| 1  | 2.533819000  | 1.706088000  | -2.013125000 |
| 1  | 2.684277000  | 3.464886000  | -2.076558000 |
| 15 | -2.447185000 | -0.526597000 | -0.070307000 |
| 15 | 0.526044000  | 2.372817000  | -0.070723000 |
| 15 | 1.877230000  | -1.557014000 | -0.180736000 |
| 14 | 0.010105000  | -0.083501000 | 1.966160000  |

**[1c'<sub>PB</sub>]** (TE = -2939.287303)

|   |              |              |             |
|---|--------------|--------------|-------------|
| 6 | 0.417016000  | 2.458497000  | 1.931098000 |
| 6 | 0.781518000  | 1.166921000  | 2.666338000 |
| 6 | -2.617922000 | 0.490819000  | 1.649745000 |
| 6 | -1.625817000 | -0.163792000 | 2.619212000 |



|    |              |              |              |
|----|--------------|--------------|--------------|
| 6  | 2.037266000  | -1.697745000 | 1.634367000  |
| 6  | 0.715773000  | -1.553242000 | 2.392717000  |
| 1  | -2.412361000 | 1.562903000  | 1.534512000  |
| 1  | -1.761638000 | 0.313576000  | 3.605821000  |
| 1  | 2.619388000  | -2.570388000 | 1.955501000  |
| 1  | 0.919874000  | -1.716352000 | 3.469005000  |
| 1  | 0.892246000  | 3.353337000  | 2.356488000  |
| 1  | 1.868361000  | 1.007461000  | 2.583797000  |
| 6  | 0.221851000  | 3.823152000  | -0.701726000 |
| 1  | 1.016287000  | 4.581368000  | -0.638185000 |
| 6  | -3.157254000 | -1.948061000 | 0.172255000  |
| 1  | -2.313578000 | -2.472421000 | 0.648440000  |
| 6  | 3.455439000  | -1.400071000 | -0.880216000 |
| 1  | 3.698652000  | -0.409819000 | -0.464172000 |
| 23 | -0.000990000 | 0.016683000  | -0.405364000 |
| 1  | -0.663051000 | 2.630427000  | 1.991685000  |
| 1  | 0.613981000  | 1.332033000  | 3.746674000  |
| 1  | 0.049236000  | -2.386961000 | 2.115162000  |
| 1  | 2.679896000  | -0.823475000 | 1.812084000  |
| 1  | -1.950980000 | -1.205774000 | 2.774161000  |
| 1  | -3.657333000 | 0.414630000  | 2.001044000  |
| 6  | 4.530737000  | -2.386523000 | -0.448588000 |
| 1  | 5.517607000  | -2.075336000 | -0.811105000 |
| 1  | 4.600322000  | -2.480567000 | 0.639272000  |
| 1  | 4.348659000  | -3.387107000 | -0.856345000 |
| 6  | 3.393402000  | -1.269935000 | -2.395921000 |
| 1  | 3.161192000  | -2.227956000 | -2.876276000 |
| 1  | 2.625304000  | -0.554291000 | -2.710988000 |
| 1  | 4.350593000  | -0.932594000 | -2.809302000 |
| 6  | -4.360772000 | -2.099328000 | 1.093835000  |
| 1  | -4.622472000 | -3.159055000 | 1.200315000  |
| 1  | -4.165586000 | -1.719116000 | 2.099862000  |
| 1  | -5.250649000 | -1.590653000 | 0.714838000  |
| 6  | -3.399770000 | -2.603605000 | -1.180964000 |
| 1  | -4.289522000 | -2.195527000 | -1.673172000 |
| 1  | -2.553108000 | -2.466810000 | -1.862272000 |
| 1  | -3.563188000 | -3.681981000 | -1.073764000 |
| 6  | -0.059622000 | 3.523279000  | -2.170660000 |
| 1  | 0.803638000  | 3.099106000  | -2.692418000 |
| 1  | -0.879132000 | 2.797980000  | -2.258899000 |
| 1  | -0.361514000 | 4.427533000  | -2.711769000 |
| 6  | -1.030754000 | 4.370790000  | -0.032256000 |
| 1  | -0.845760000 | 4.731895000  | 0.982613000  |
| 1  | -1.447562000 | 5.204416000  | -0.608501000 |
| 1  | -1.812240000 | 3.601070000  | 0.028523000  |
| 6  | 1.499296000  | -3.546181000 | -0.650378000 |

|    |              |              |              |
|----|--------------|--------------|--------------|
| 1  | 2.161865000  | -3.703134000 | -1.515100000 |
| 6  | 0.069559000  | -3.791012000 | -1.111489000 |
| 1  | -0.644375000 | -3.621977000 | -0.297039000 |
| 1  | -0.219800000 | -3.115525000 | -1.923075000 |
| 1  | -0.065277000 | -4.821374000 | -1.462122000 |
| 6  | 1.891630000  | -4.537697000 | 0.436028000  |
| 1  | 1.754499000  | -5.567666000 | 0.086123000  |
| 1  | 2.934186000  | -4.438091000 | 0.749523000  |
| 1  | 1.269442000  | -4.419620000 | 1.330033000  |
| 6  | -3.593790000 | 0.794936000  | -1.070906000 |
| 1  | -3.268601000 | 1.811339000  | -0.793491000 |
| 6  | -5.080023000 | 0.674946000  | -0.766951000 |
| 1  | -5.482790000 | -0.290467000 | -1.090148000 |
| 1  | -5.301809000 | 0.786025000  | 0.298500000  |
| 1  | -5.648934000 | 1.446332000  | -1.299567000 |
| 6  | -3.310194000 | 0.623586000  | -2.559031000 |
| 1  | -3.634425000 | -0.354094000 | -2.928813000 |
| 1  | -3.835557000 | 1.381039000  | -3.152015000 |
| 1  | -2.240063000 | 0.715824000  | -2.779382000 |
| 6  | 2.699809000  | 2.499598000  | 0.153306000  |
| 1  | 3.052465000  | 1.575860000  | 0.638772000  |
| 6  | 3.214880000  | 3.687814000  | 0.951969000  |
| 1  | 4.305472000  | 3.766463000  | 0.871359000  |
| 1  | 2.804955000  | 4.638047000  | 0.590535000  |
| 1  | 2.978380000  | 3.611700000  | 2.016060000  |
| 6  | 3.238843000  | 2.514408000  | -1.270660000 |
| 1  | 4.332653000  | 2.445066000  | -1.282100000 |
| 1  | 2.849361000  | 1.679436000  | -1.864056000 |
| 1  | 2.975415000  | 3.442707000  | -1.791151000 |
| 15 | -2.421162000 | -0.231257000 | -0.036614000 |
| 15 | 0.834799000  | 2.262062000  | 0.141344000  |
| 15 | 1.745931000  | -1.724171000 | -0.193072000 |
| 5  | -0.049996000 | -0.148393000 | 2.253256000  |

[1d'<sub>sc</sub>] (TE = -2767.668511)

|   |              |              |             |
|---|--------------|--------------|-------------|
| 6 | 0.956324000  | 1.927594000  | 1.584134000 |
| 6 | 0.757260000  | 0.547469000  | 2.188438000 |
| 6 | -2.473681000 | 1.074071000  | 0.908879000 |
| 6 | -1.727493000 | 0.211264000  | 1.920395000 |
| 6 | 1.069058000  | -2.444235000 | 1.413938000 |
| 6 | -0.190822000 | -1.754954000 | 1.909354000 |
| 1 | -1.988174000 | 2.042441000  | 0.754563000 |
| 1 | -1.695835000 | 0.786842000  | 2.866171000 |
| 1 | 1.065827000  | -3.515127000 | 1.639450000 |
| 1 | -0.221404000 | -1.905339000 | 3.011155000 |

|    |              |              |              |
|----|--------------|--------------|--------------|
| 1  | 1.716238000  | 2.508392000  | 2.117991000  |
| 1  | 1.726495000  | 0.028144000  | 2.145186000  |
| 6  | 1.158760000  | 3.406307000  | -0.873401000 |
| 1  | 1.564680000  | 3.296540000  | -1.887138000 |
| 6  | -3.492911000 | -1.211972000 | -0.463871000 |
| 1  | -2.999556000 | -1.698329000 | 0.386511000  |
| 6  | 3.117372000  | -1.786899000 | -0.429706000 |
| 1  | 3.212603000  | -0.966787000 | 0.296009000  |
| 23 | -0.082522000 | -0.188459000 | -0.679612000 |
| 16 | -2.495028000 | 0.345533000  | -0.779902000 |
| 16 | 1.496098000  | 1.714993000  | -0.164110000 |
| 16 | 1.288967000  | -2.228278000 | -0.411175000 |
| 6  | -0.328749000 | -0.284811000 | 1.505441000  |
| 1  | 0.023696000  | 2.504222000  | 1.589697000  |
| 1  | 0.557684000  | 0.689063000  | 3.271629000  |
| 1  | -1.057381000 | -2.312429000 | 1.522586000  |
| 1  | 1.967850000  | -2.020982000 | 1.874725000  |
| 1  | -2.371777000 | -0.648777000 | 2.156867000  |
| 1  | -3.504977000 | 1.282544000  | 1.219900000  |
| 6  | 3.964222000  | -2.971598000 | -0.016530000 |
| 1  | 5.027418000  | -2.704063000 | 0.000406000  |
| 1  | 3.706004000  | -3.339929000 | 0.980373000  |
| 1  | 3.843987000  | -3.804062000 | -0.717617000 |
| 6  | 3.451653000  | -1.281727000 | -1.815972000 |
| 1  | 3.308923000  | -2.062898000 | -2.570980000 |
| 1  | 2.826824000  | -0.425493000 | -2.092303000 |
| 1  | 4.497460000  | -0.961545000 | -1.870708000 |
| 6  | -4.933360000 | -0.883951000 | -0.133511000 |
| 1  | -5.507457000 | -1.800563000 | 0.044414000  |
| 1  | -5.025806000 | -0.268420000 | 0.765432000  |
| 1  | -5.416983000 | -0.347162000 | -0.956149000 |
| 6  | -3.349715000 | -2.090727000 | -1.687600000 |
| 1  | -3.765078000 | -1.611361000 | -2.581381000 |
| 1  | -2.295535000 | -2.322005000 | -1.881795000 |
| 1  | -3.880949000 | -3.037571000 | -1.545995000 |
| 6  | -0.318712000 | 3.727071000  | -0.959605000 |
| 1  | -0.880352000 | 2.933603000  | -1.462697000 |
| 1  | -0.759255000 | 3.871137000  | 0.032954000  |
| 1  | -0.477210000 | 4.659505000  | -1.512762000 |
| 6  | 1.945234000  | 4.468329000  | -0.129678000 |
| 1  | 3.007611000  | 4.220470000  | -0.062601000 |
| 1  | 1.857011000  | 5.437377000  | -0.633240000 |
| 1  | 1.568194000  | 4.603761000  | 0.889186000  |

[1e' ssi] (TE = -3019.083593)

|    |              |              |              |
|----|--------------|--------------|--------------|
| 23 | -0.011401000 | -0.212553000 | -1.017073000 |
| 16 | 2.063455000  | -1.574640000 | -1.041490000 |
| 16 | -2.304978000 | -1.207352000 | -1.204824000 |
| 16 | -0.379837000 | 1.913442000  | 0.218293000  |
| 14 | -0.214694000 | -1.005529000 | 1.308329000  |
| 6  | -0.272646000 | 0.453361000  | 2.560032000  |
| 6  | 0.369284000  | 1.665349000  | 1.898976000  |
| 6  | -2.284629000 | -2.533028000 | 0.089131000  |
| 6  | -1.810838000 | -2.075020000 | 1.464142000  |
| 6  | 1.345875000  | -2.079258000 | 1.659767000  |
| 6  | 1.837324000  | -2.738371000 | 0.378469000  |
| 1  | 1.102132000  | -3.452076000 | -0.009801000 |
| 1  | 2.776406000  | -3.292710000 | 0.493976000  |
| 1  | 2.134822000  | -1.427443000 | 2.064248000  |
| 1  | 1.192910000  | -2.860352000 | 2.419378000  |
| 1  | -3.279721000 | -2.994564000 | 0.096810000  |
| 1  | -1.600050000 | -3.271214000 | -0.342466000 |
| 1  | -2.599556000 | -1.477724000 | 1.943211000  |
| 1  | -1.692658000 | -2.963566000 | 2.100827000  |
| 1  | -1.317591000 | 0.686003000  | 2.807679000  |
| 1  | 0.235015000  | 0.260545000  | 3.515173000  |
| 1  | 1.446638000  | 1.509764000  | 1.759113000  |
| 1  | 0.232179000  | 2.596520000  | 2.463331000  |
| 6  | 3.476543000  | -0.512957000 | -0.406824000 |
| 1  | 3.034644000  | 0.109107000  | 0.384442000  |
| 6  | -3.481979000 | 0.009481000  | -0.419172000 |
| 1  | -2.961221000 | 0.377903000  | 0.475663000  |
| 6  | 0.413392000  | 3.533214000  | -0.266939000 |
| 1  | 0.139620000  | 3.590460000  | -1.328459000 |
| 6  | -4.799924000 | -0.633100000 | -0.040448000 |
| 1  | -5.486424000 | 0.120830000  | 0.361614000  |
| 1  | -5.286195000 | -1.091028000 | -0.908263000 |
| 1  | -4.687422000 | -1.403743000 | 0.726377000  |
| 6  | -3.656128000 | 1.151683000  | -1.399195000 |
| 1  | -2.691521000 | 1.577845000  | -1.695421000 |
| 1  | -4.175446000 | 0.823905000  | -2.306205000 |
| 1  | -4.247098000 | 1.955344000  | -0.948135000 |
| 6  | -0.207667000 | 4.700679000  | 0.475527000  |
| 1  | 0.000184000  | 4.652839000  | 1.549385000  |
| 1  | 0.201105000  | 5.651942000  | 0.114960000  |
| 1  | -1.292632000 | 4.732773000  | 0.349363000  |
| 6  | 1.923010000  | 3.492807000  | -0.143364000 |
| 1  | 2.375332000  | 4.361279000  | -0.635140000 |
| 1  | 2.242627000  | 3.517599000  | 0.903398000  |

|   |             |              |              |
|---|-------------|--------------|--------------|
| 1 | 2.340320000 | 2.590455000  | -0.600830000 |
| 6 | 3.895673000 | 0.365927000  | -1.567449000 |
| 1 | 4.615556000 | 1.123764000  | -1.240823000 |
| 1 | 4.367080000 | -0.222965000 | -2.361403000 |
| 1 | 3.036243000 | 0.889142000  | -2.004015000 |
| 6 | 4.626076000 | -1.332562000 | 0.139472000  |
| 1 | 5.467471000 | -0.679644000 | 0.398602000  |
| 1 | 4.358013000 | -1.882612000 | 1.044878000  |
| 1 | 4.988745000 | -2.054691000 | -0.599823000 |

[ $\mathbf{1f}_{SB}$ ] (TE = -2754.429904)

|    |              |              |              |
|----|--------------|--------------|--------------|
| 6  | -1.088334000 | -1.909816000 | 1.608422000  |
| 6  | -0.841994000 | -0.560484000 | 2.268320000  |
| 6  | 2.498242000  | -1.244668000 | 0.854186000  |
| 6  | 1.894041000  | -0.403586000 | 1.972875000  |
| 6  | -0.873173000 | 2.562475000  | 1.382335000  |
| 6  | 0.385239000  | 1.868382000  | 1.873278000  |
| 1  | 1.928303000  | -2.163744000 | 0.684873000  |
| 1  | 1.869781000  | -1.060253000 | 2.860879000  |
| 1  | -0.857719000 | 3.646221000  | 1.539132000  |
| 1  | 0.501545000  | 2.148884000  | 2.939270000  |
| 1  | -1.878428000 | -2.488769000 | 2.099923000  |
| 1  | -1.774291000 | 0.022995000  | 2.211771000  |
| 6  | -1.366502000 | -3.341971000 | -0.871548000 |
| 1  | -1.763201000 | -3.196296000 | -1.884425000 |
| 6  | 3.521132000  | 1.070067000  | -0.457707000 |
| 1  | 3.076446000  | 1.529680000  | 0.432582000  |
| 6  | -3.014862000 | 1.950783000  | -0.375209000 |
| 1  | -3.142994000 | 1.158610000  | 0.376043000  |
| 23 | 0.075271000  | 0.144828000  | -0.714955000 |
| 16 | 2.461659000  | -0.438142000 | -0.805697000 |
| 16 | -1.604674000 | -1.642893000 | -0.142762000 |
| 16 | -1.166295000 | 2.267180000  | -0.425267000 |
| 1  | -0.176804000 | -2.520229000 | 1.601030000  |
| 1  | -0.711626000 | -0.761944000 | 3.348299000  |
| 1  | 1.257505000  | 2.327476000  | 1.382722000  |
| 1  | -1.763034000 | 2.173139000  | 1.889704000  |
| 1  | 2.622606000  | 0.378222000  | 2.239911000  |
| 1  | 3.532747000  | -1.549682000 | 1.056838000  |
| 6  | -3.765861000 | 3.201063000  | 0.031470000  |
| 1  | -4.843385000 | 3.006309000  | 0.085323000  |
| 1  | -3.453815000 | 3.574055000  | 1.010808000  |
| 1  | -3.611160000 | 4.006255000  | -0.694250000 |
| 6  | -3.431468000 | 1.435810000  | -1.735797000 |

|   |              |              |              |
|---|--------------|--------------|--------------|
| 1 | -3.260827000 | 2.185920000  | -2.515940000 |
| 1 | -2.880903000 | 0.529705000  | -2.010088000 |
| 1 | -4.498631000 | 1.190543000  | -1.745751000 |
| 6 | 4.958574000  | 0.676550000  | -0.191574000 |
| 1 | 5.570917000  | 1.563929000  | 0.005870000  |
| 1 | 5.056781000  | 0.019509000  | 0.676801000  |
| 1 | 5.395628000  | 0.159896000  | -1.052323000 |
| 6 | 3.371167000  | 2.010522000  | -1.633652000 |
| 1 | 3.746088000  | 1.561877000  | -2.560609000 |
| 1 | 2.320709000  | 2.283798000  | -1.788318000 |
| 1 | 3.936577000  | 2.932580000  | -1.463459000 |
| 6 | 0.089821000  | -3.747471000 | -0.959404000 |
| 1 | 0.695776000  | -2.984362000 | -1.458246000 |
| 1 | 0.521056000  | -3.921620000 | 0.032405000  |
| 1 | 0.193819000  | -4.684318000 | -1.517998000 |
| 6 | -2.215834000 | -4.365365000 | -0.142555000 |
| 1 | -3.261005000 | -4.054264000 | -0.068856000 |
| 1 | -2.187820000 | -5.328922000 | -0.663106000 |
| 1 | -1.846251000 | -4.541567000 | 0.872587000  |
| 5 | 0.436441000  | 0.266650000  | 1.751909000  |

[1a''<sub>pc</sub>] (TE = -3409.796611)

|   |              |              |             |
|---|--------------|--------------|-------------|
| 6 | -1.168455000 | 0.729630000  | 1.595096000 |
| 6 | -1.791861000 | 0.251621000  | 2.759043000 |
| 1 | -1.338023000 | -0.585577000 | 3.286754000 |
| 6 | -2.962134000 | 0.812370000  | 3.260224000 |
| 1 | -3.414193000 | 0.404287000  | 4.162768000 |
| 6 | -3.540403000 | 1.900322000  | 2.618194000 |
| 1 | -4.450602000 | 2.354921000  | 3.003565000 |
| 6 | -2.948622000 | 2.394039000  | 1.458530000 |
| 1 | -3.428523000 | 3.222390000  | 0.940544000 |
| 6 | -1.791091000 | 1.818621000  | 0.920350000 |
| 6 | 0.314724000  | -1.301633000 | 1.570780000 |
| 6 | 1.201743000  | -1.607048000 | 2.616577000 |
| 1 | 1.737535000  | -0.796195000 | 3.106172000 |
| 6 | 1.431486000  | -2.912996000 | 3.036224000 |
| 1 | 2.137976000  | -3.104929000 | 3.842107000 |
| 6 | 0.757564000  | -3.966119000 | 2.430084000 |
| 1 | 0.928322000  | -4.992761000 | 2.747189000 |
| 6 | -0.140271000 | -3.690941000 | 1.402965000 |
| 1 | -0.657636000 | -4.519306000 | 0.926226000 |
| 6 | -0.361539000 | -2.384272000 | 0.955590000 |
| 6 | 1.327928000  | 0.938377000  | 1.408335000 |
| 6 | 1.380515000  | 1.787583000  | 2.521537000 |
| 1 | 0.485557000  | 1.906722000  | 3.131056000 |

|    |              |              |              |
|----|--------------|--------------|--------------|
| 6  | 2.539745000  | 2.473202000  | 2.868550000  |
| 1  | 2.542142000  | 3.129027000  | 3.737671000  |
| 6  | 3.696431000  | 2.307457000  | 2.115885000  |
| 1  | 4.611745000  | 2.831490000  | 2.382703000  |
| 6  | 3.673772000  | 1.459812000  | 1.011105000  |
| 1  | 4.582159000  | 1.334373000  | 0.427863000  |
| 6  | 2.507408000  | 0.787891000  | 0.633676000  |
| 6  | 0.109187000  | 0.115624000  | 1.091034000  |
| 23 | -0.105389000 | 0.058260000  | -1.157584000 |
| 6  | -2.809796000 | 2.635954000  | -1.688520000 |
| 1  | -3.355404000 | 3.397845000  | -1.117939000 |
| 6  | -1.090509000 | -3.535506000 | -1.632515000 |
| 1  | -0.049591000 | -3.807439000 | -1.396143000 |
| 6  | 3.508306000  | 0.553579000  | -2.192008000 |
| 1  | 3.163186000  | 0.035659000  | -3.101278000 |
| 6  | 5.011397000  | 0.314318000  | -2.096013000 |
| 1  | 5.511455000  | 0.749093000  | -2.969852000 |
| 1  | 5.464416000  | 0.778462000  | -1.216520000 |
| 1  | 5.272448000  | -0.745041000 | -2.077411000 |
| 6  | 3.201381000  | 2.036790000  | -2.372956000 |
| 1  | 3.530893000  | 2.623182000  | -1.508582000 |
| 1  | 3.718497000  | 2.435259000  | -3.252727000 |
| 1  | 2.128797000  | 2.223503000  | -2.498133000 |
| 6  | -2.498078000 | 3.198324000  | -3.070532000 |
| 1  | -1.994832000 | 4.168244000  | -3.035281000 |
| 1  | -1.856033000 | 2.516749000  | -3.642794000 |
| 1  | -3.417346000 | 3.332946000  | -3.651221000 |
| 6  | -3.686571000 | 1.401604000  | -1.801734000 |
| 1  | -3.888975000 | 0.942161000  | -0.829220000 |
| 1  | -4.650007000 | 1.644274000  | -2.264997000 |
| 1  | -3.203054000 | 0.640583000  | -2.424421000 |
| 6  | -1.963899000 | -4.766914000 | -1.415567000 |
| 1  | -1.612615000 | -5.591208000 | -2.047578000 |
| 1  | -1.961947000 | -5.132266000 | -0.387239000 |
| 1  | -3.005895000 | -4.586880000 | -1.691585000 |
| 6  | -1.134293000 | -3.112432000 | -3.099053000 |
| 1  | -2.135509000 | -2.780851000 | -3.396938000 |
| 1  | -0.440495000 | -2.287969000 | -3.302937000 |
| 1  | -0.861651000 | -3.944206000 | -3.758860000 |
| 15 | 2.340285000  | -0.180359000 | -0.914209000 |
| 15 | -1.323070000 | -2.007563000 | -0.556923000 |
| 15 | -1.215823000 | 2.238764000  | -0.776968000 |
| 6  | -3.114266000 | -1.945801000 | 0.018793000  |
| 1  | -3.152719000 | -0.931421000 | 0.444915000  |
| 6  | -4.090293000 | -1.994271000 | -1.151411000 |
| 1  | -4.235329000 | -3.012648000 | -1.521760000 |

|   |              |              |              |
|---|--------------|--------------|--------------|
| 1 | -5.076691000 | -1.626098000 | -0.847792000 |
| 1 | -3.765226000 | -1.381470000 | -1.995963000 |
| 6 | -3.502685000 | -2.920311000 | 1.120867000  |
| 1 | -4.520193000 | -2.710393000 | 1.471996000  |
| 1 | -3.492329000 | -3.960076000 | 0.779525000  |
| 1 | -2.838223000 | -2.848859000 | 1.985801000  |
| 6 | -0.450264000 | 3.960688000  | -0.736381000 |
| 1 | -0.193549000 | 4.128995000  | -1.793651000 |
| 6 | 0.838067000  | 3.998346000  | 0.066754000  |
| 1 | 0.637059000  | 3.911064000  | 1.137819000  |
| 1 | 1.525754000  | 3.191884000  | -0.198732000 |
| 1 | 1.358268000  | 4.950478000  | -0.088912000 |
| 6 | -1.386770000 | 5.068468000  | -0.272879000 |
| 1 | -0.869537000 | 6.034980000  | -0.285882000 |
| 1 | -2.278931000 | 5.177436000  | -0.895074000 |
| 1 | -1.716256000 | 4.901325000  | 0.758367000  |
| 6 | 3.003603000  | -1.892661000 | -0.526901000 |
| 1 | 2.172732000  | -2.317493000 | 0.051301000  |
| 6 | 4.242250000  | -1.963705000 | 0.354842000  |
| 1 | 4.446846000  | -3.003484000 | 0.636791000  |
| 1 | 5.142163000  | -1.581151000 | -0.133876000 |
| 1 | 4.106657000  | -1.399685000 | 1.282009000  |
| 6 | 3.121375000  | -2.715997000 | -1.803486000 |
| 1 | 3.304727000  | -3.770499000 | -1.569074000 |
| 1 | 2.201026000  | -2.670610000 | -2.398492000 |
| 1 | 3.943542000  | -2.385508000 | -2.446799000 |

**[1b''<sub>psi</sub>]-Quintet (TE = -3661.210176)**

|   |              |              |             |
|---|--------------|--------------|-------------|
| 6 | -0.793846000 | 1.725225000  | 1.799357000 |
| 6 | -0.548215000 | 2.360355000  | 3.023000000 |
| 1 | 0.111979000  | 1.884840000  | 3.750156000 |
| 6 | -1.099551000 | 3.602854000  | 3.324950000 |
| 1 | -0.881623000 | 4.083289000  | 4.277352000 |
| 6 | -1.923810000 | 4.233956000  | 2.398897000 |
| 1 | -2.354161000 | 5.208413000  | 2.622297000 |
| 6 | -2.192759000 | 3.619617000  | 1.178643000 |
| 1 | -2.835744000 | 4.130132000  | 0.463941000 |
| 6 | -1.629724000 | 2.378975000  | 0.865518000 |
| 6 | -0.881722000 | -1.368405000 | 1.990725000 |
| 6 | -1.395821000 | -1.397505000 | 3.292400000 |
| 1 | -1.226119000 | -0.545618000 | 3.953108000 |
| 6 | -2.151133000 | -2.470599000 | 3.757584000 |
| 1 | -2.553571000 | -2.461603000 | 4.769185000 |
| 6 | -2.396610000 | -3.552540000 | 2.918823000 |
| 1 | -2.989778000 | -4.395167000 | 3.269215000 |



|    |              |              |              |
|----|--------------|--------------|--------------|
| 6  | -1.887566000 | -3.554396000 | 1.622809000  |
| 1  | -2.093886000 | -4.408272000 | 0.981857000  |
| 6  | -1.144588000 | -2.470559000 | 1.144660000  |
| 6  | 1.841446000  | 0.059161000  | 1.789948000  |
| 6  | 2.257226000  | -0.345829000 | 3.064574000  |
| 1  | 1.508436000  | -0.537395000 | 3.834830000  |
| 6  | 3.599897000  | -0.557517000 | 3.364277000  |
| 1  | 3.894641000  | -0.890516000 | 4.358065000  |
| 6  | 4.564058000  | -0.359085000 | 2.381024000  |
| 1  | 5.615553000  | -0.535434000 | 2.599617000  |
| 6  | 4.181155000  | 0.061836000  | 1.111285000  |
| 1  | 4.947789000  | 0.213803000  | 0.354914000  |
| 6  | 2.832388000  | 0.270699000  | 0.803055000  |
| 23 | -0.069811000 | -0.041483000 | -1.224729000 |
| 6  | -3.679711000 | 0.943248000  | -0.561692000 |
| 1  | -4.300923000 | 1.839829000  | -0.424226000 |
| 6  | 0.890346000  | -3.656153000 | -0.508483000 |
| 1  | 0.423892000  | -4.617403000 | -0.246092000 |
| 6  | 2.676069000  | 2.597346000  | -0.963489000 |
| 1  | 2.790407000  | 2.787691000  | -2.043284000 |
| 6  | 3.947724000  | 3.020356000  | -0.239398000 |
| 1  | 4.147481000  | 4.084256000  | -0.413996000 |
| 1  | 3.842206000  | 2.886886000  | 0.841819000  |
| 1  | 4.837061000  | 2.469587000  | -0.548023000 |
| 6  | 1.503879000  | 3.423628000  | -0.451965000 |
| 1  | 1.313397000  | 3.233342000  | 0.610783000  |
| 1  | 1.707956000  | 4.495397000  | -0.557481000 |
| 1  | 0.577889000  | 3.197686000  | -0.985477000 |
| 6  | -4.132966000 | 0.195309000  | -1.808089000 |
| 1  | -3.989438000 | 0.759965000  | -2.734654000 |
| 1  | -3.572913000 | -0.740756000 | -1.912154000 |
| 1  | -5.195649000 | -0.065802000 | -1.745559000 |
| 6  | -3.829861000 | 0.053736000  | 0.663076000  |
| 1  | -3.502234000 | 0.541261000  | 1.585854000  |
| 1  | -4.877208000 | -0.240542000 | 0.796260000  |
| 1  | -3.245339000 | -0.866462000 | 0.557050000  |
| 6  | 1.584562000  | -3.779803000 | -1.857640000 |
| 1  | 2.379194000  | -4.533883000 | -1.822256000 |
| 1  | 0.908966000  | -4.058556000 | -2.671539000 |
| 1  | 2.052141000  | -2.827582000 | -2.136321000 |
| 6  | 1.900898000  | -3.290756000 | 0.568364000  |
| 1  | 2.397846000  | -2.342381000 | 0.336886000  |
| 1  | 1.447393000  | -3.184520000 | 1.558117000  |
| 1  | 2.680258000  | -4.057967000 | 0.640375000  |
| 14 | 0.026270000  | 0.111805000  | 1.200622000  |
| 15 | -0.499864000 | -2.391085000 | -0.589168000 |

|    |              |              |              |
|----|--------------|--------------|--------------|
| 15 | 2.255153000  | 0.756687000  | -0.882974000 |
| 15 | -1.910157000 | 1.550151000  | -0.765727000 |
| 6  | -2.104375000 | 2.998355000  | -1.974650000 |
| 1  | -1.459465000 | 3.774483000  | -1.537686000 |
| 6  | -3.493071000 | 3.595943000  | -2.165546000 |
| 1  | -3.441180000 | 4.474378000  | -2.819370000 |
| 1  | -4.184540000 | 2.893397000  | -2.640360000 |
| 1  | -3.958807000 | 3.921091000  | -1.231912000 |
| 6  | -1.504203000 | 2.594564000  | -3.318422000 |
| 1  | -0.472583000 | 2.235022000  | -3.203894000 |
| 1  | -2.078782000 | 1.788608000  | -3.791785000 |
| 1  | -1.488083000 | 3.435119000  | -4.021844000 |
| 6  | 3.452695000  | -0.037693000 | -2.108158000 |
| 1  | 3.624234000  | -1.036119000 | -1.675803000 |
| 6  | 2.687103000  | -0.210625000 | -3.419733000 |
| 1  | 2.449813000  | 0.758601000  | -3.875604000 |
| 1  | 3.271544000  | -0.777160000 | -4.153749000 |
| 1  | 1.739836000  | -0.747585000 | -3.271155000 |
| 6  | 4.799679000  | 0.614277000  | -2.393208000 |
| 1  | 4.686917000  | 1.636764000  | -2.768878000 |
| 1  | 5.459463000  | 0.654672000  | -1.524587000 |
| 1  | 5.333736000  | 0.052642000  | -3.168855000 |
| 6  | -1.804544000 | -3.270872000 | -1.639488000 |
| 1  | -2.747712000 | -2.954670000 | -1.166162000 |
| 6  | -1.779191000 | -4.793612000 | -1.707089000 |
| 1  | -2.640239000 | -5.164187000 | -2.275481000 |
| 1  | -0.885132000 | -5.163246000 | -2.218684000 |
| 1  | -1.810371000 | -5.279329000 | -0.729642000 |
| 6  | -1.767633000 | -2.690078000 | -3.052134000 |
| 1  | -1.800636000 | -1.592514000 | -3.043940000 |
| 1  | -0.855881000 | -2.983966000 | -3.584986000 |
| 1  | -2.616471000 | -3.040449000 | -3.650872000 |

[1c''<sub>PB</sub>] (TE = -3396.561486)

|   |              |              |             |
|---|--------------|--------------|-------------|
| 6 | 1.482139000  | -0.420617000 | 2.071463000 |
| 6 | 1.620743000  | -1.093442000 | 3.299667000 |
| 1 | 0.720009000  | -1.383639000 | 3.840624000 |
| 6 | 2.857312000  | -1.375910000 | 3.867032000 |
| 1 | 2.911025000  | -1.882097000 | 4.830062000 |
| 6 | 4.028881000  | -0.986098000 | 3.220751000 |
| 1 | 5.001184000  | -1.174538000 | 3.671419000 |
| 6 | 3.938274000  | -0.369274000 | 1.978525000 |
| 1 | 4.854389000  | -0.078604000 | 1.465466000 |
| 6 | 2.693524000  | -0.122470000 | 1.387159000 |
| 6 | -0.134048000 | 1.592536000  | 1.490224000 |

|    |              |              |              |
|----|--------------|--------------|--------------|
| 6  | 0.774620000  | 2.427872000  | 2.227107000  |
| 1  | 1.494827000  | 1.928263000  | 2.873947000  |
| 6  | 0.737813000  | 3.797188000  | 2.242724000  |
| 1  | 1.419860000  | 4.348580000  | 2.888905000  |
| 6  | -0.188763000 | 4.495969000  | 1.434800000  |
| 1  | -0.230543000 | 5.583242000  | 1.448759000  |
| 6  | -1.048562000 | 3.777792000  | 0.647120000  |
| 1  | -1.778505000 | 4.313319000  | 0.044758000  |
| 6  | -1.054529000 | 2.348208000  | 0.622396000  |
| 6  | -1.138244000 | -1.000972000 | 1.715242000  |
| 6  | -1.757592000 | -1.153179000 | 2.968242000  |
| 1  | -1.489008000 | -0.464042000 | 3.770040000  |
| 6  | -2.710443000 | -2.135463000 | 3.214917000  |
| 1  | -3.174029000 | -2.213997000 | 4.197396000  |
| 6  | -3.070297000 | -3.020806000 | 2.202978000  |
| 1  | -3.806267000 | -3.801077000 | 2.387148000  |
| 6  | -2.479316000 | -2.903112000 | 0.948934000  |
| 1  | -2.757034000 | -3.609604000 | 0.171757000  |
| 6  | -1.537171000 | -1.897116000 | 0.696333000  |
| 23 | 0.107042000  | 0.722419000  | -0.663974000 |
| 6  | 3.821832000  | 1.811323000  | -0.535614000 |
| 1  | 4.796942000  | 1.381934000  | -0.261989000 |
| 6  | -3.964519000 | 1.486399000  | 0.152522000  |
| 1  | -4.233044000 | 2.551400000  | 0.226354000  |
| 6  | 0.395121000  | -3.232377000 | -1.031352000 |
| 1  | 1.135011000  | -2.988286000 | -1.808016000 |
| 6  | -0.325396000 | -4.507497000 | -1.449697000 |
| 1  | 0.381655000  | -5.345524000 | -1.462970000 |
| 1  | -1.116436000 | -4.777529000 | -0.743206000 |
| 1  | -0.768851000 | -4.449439000 | -2.445476000 |
| 6  | 1.129263000  | -3.469545000 | 0.285464000  |
| 1  | 0.435831000  | -3.803113000 | 1.064787000  |
| 1  | 1.888824000  | -4.250171000 | 0.165225000  |
| 1  | 1.624369000  | -2.576608000 | 0.672642000  |
| 6  | 3.883702000  | 2.291269000  | -1.980778000 |
| 1  | 4.244938000  | 1.526325000  | -2.672102000 |
| 1  | 2.895637000  | 2.613175000  | -2.334419000 |
| 1  | 4.554445000  | 3.152500000  | -2.073799000 |
| 6  | 3.518787000  | 2.971447000  | 0.397425000  |
| 1  | 3.474625000  | 2.663106000  | 1.445290000  |
| 1  | 4.286903000  | 3.748034000  | 0.306897000  |
| 1  | 2.553796000  | 3.432201000  | 0.158839000  |
| 6  | -4.876137000 | 0.803098000  | -0.858426000 |
| 1  | -5.916023000 | 0.819014000  | -0.514182000 |
| 1  | -4.856250000 | 1.275473000  | -1.845255000 |
| 1  | -4.597885000 | -0.249148000 | -0.988452000 |

|    |              |              |              |
|----|--------------|--------------|--------------|
| 6  | -4.086559000 | 0.850673000  | 1.526277000  |
| 1  | -3.896092000 | -0.225598000 | 1.483055000  |
| 1  | -3.382686000 | 1.277494000  | 2.246261000  |
| 1  | -5.098371000 | 0.991098000  | 1.922399000  |
| 5  | 0.052614000  | 0.052959000  | 1.526167000  |
| 15 | 2.551760000  | 0.457227000  | -0.346829000 |
| 15 | -2.199294000 | 1.466584000  | -0.448181000 |
| 15 | -0.643109000 | -1.669516000 | -0.892380000 |
| 6  | -2.282129000 | 2.392043000  | -2.080887000 |
| 1  | -2.757878000 | 1.639346000  | -2.729490000 |
| 6  | -0.853843000 | 2.574337000  | -2.592931000 |
| 1  | -0.835453000 | 3.004710000  | -3.600237000 |
| 1  | -0.266257000 | 3.237023000  | -1.947612000 |
| 1  | -0.315025000 | 1.607167000  | -2.697078000 |
| 6  | -3.103533000 | 3.669251000  | -2.200167000 |
| 1  | -3.228854000 | 3.944836000  | -3.253780000 |
| 1  | -4.106607000 | 3.562808000  | -1.777335000 |
| 1  | -2.629249000 | 4.521833000  | -1.708705000 |
| 6  | 3.286571000  | -0.959390000 | -1.352788000 |
| 1  | 2.856675000  | -1.836676000 | -0.853091000 |
| 6  | 4.801251000  | -1.102965000 | -1.319999000 |
| 1  | 5.108720000  | -2.006125000 | -1.859758000 |
| 1  | 5.307282000  | -0.261781000 | -1.805089000 |
| 1  | 5.195614000  | -1.189848000 | -0.305279000 |
| 6  | 2.767390000  | -0.949354000 | -2.787352000 |
| 1  | 3.011743000  | -1.889478000 | -3.296350000 |
| 1  | 1.679813000  | -0.823916000 | -2.820677000 |
| 1  | 3.205193000  | -0.143428000 | -3.384167000 |
| 6  | -1.880525000 | -1.732248000 | -2.314544000 |
| 1  | -2.305477000 | -0.720276000 | -2.253910000 |
| 6  | -1.115735000 | -1.810127000 | -3.633062000 |
| 1  | -0.600756000 | -2.766894000 | -3.768104000 |
| 1  | -1.797171000 | -1.693375000 | -4.482812000 |
| 1  | -0.359049000 | -1.022002000 | -3.711238000 |
| 6  | -3.062042000 | -2.693104000 | -2.278538000 |
| 1  | -2.773133000 | -3.746345000 | -2.265480000 |
| 1  | -3.706059000 | -2.516082000 | -1.414924000 |
| 1  | -3.680932000 | -2.545176000 | -3.172086000 |

[1d''<sub>sc</sub>] (TE = -3224.941794)

|   |              |             |             |
|---|--------------|-------------|-------------|
| 6 | -0.136847000 | 1.532528000 | 0.983608000 |
| 6 | 0.453186000  | 2.054050000 | 2.147715000 |
| 1 | 1.048309000  | 1.387298000 | 2.769498000 |
| 6 | 0.303497000  | 3.381546000 | 2.532972000 |
| 1 | 0.782671000  | 3.736768000 | 3.443498000 |

|    |              |              |              |
|----|--------------|--------------|--------------|
| 6  | -0.458573000 | 4.250992000  | 1.760199000  |
| 1  | -0.581491000 | 5.292016000  | 2.050179000  |
| 6  | -1.033832000 | 3.780313000  | 0.585443000  |
| 1  | -1.586779000 | 4.457861000  | -0.062782000 |
| 6  | -0.868590000 | 2.449659000  | 0.197242000  |
| 6  | -1.157673000 | -0.739291000 | 1.178179000  |
| 6  | -1.753144000 | -0.419881000 | 2.410560000  |
| 1  | -1.399197000 | 0.460877000  | 2.943675000  |
| 6  | -2.768899000 | -1.183437000 | 2.974508000  |
| 1  | -3.195390000 | -0.890620000 | 3.932240000  |
| 6  | -3.234081000 | -2.318954000 | 2.320537000  |
| 1  | -4.028330000 | -2.924381000 | 2.751301000  |
| 6  | -2.694244000 | -2.650598000 | 1.083595000  |
| 1  | -3.083165000 | -3.501740000 | 0.527550000  |
| 6  | -1.684808000 | -1.871055000 | 0.515087000  |
| 6  | 1.325081000  | -0.499170000 | 1.037815000  |
| 6  | 1.490264000  | -1.123893000 | 2.285873000  |
| 1  | 0.626467000  | -1.199469000 | 2.943798000  |
| 6  | 2.702816000  | -1.656075000 | 2.708167000  |
| 1  | 2.772836000  | -2.131913000 | 3.684697000  |
| 6  | 3.817999000  | -1.587253000 | 1.881784000  |
| 1  | 4.769752000  | -2.012984000 | 2.191339000  |
| 6  | 3.692353000  | -0.995300000 | 0.630759000  |
| 1  | 4.536560000  | -0.986420000 | -0.054472000 |
| 6  | 2.473290000  | -0.453491000 | 0.211691000  |
| 16 | 2.354240000  | 0.053895000  | -1.511300000 |
| 16 | -1.412993000 | 1.989374000  | -1.450633000 |
| 16 | -1.234934000 | -2.223168000 | -1.187095000 |
| 23 | -0.107948000 | -0.085278000 | -1.572166000 |
| 6  | -3.294807000 | 1.912102000  | -1.289220000 |
| 1  | -3.589008000 | 2.958179000  | -1.137272000 |
| 6  | -0.226512000 | -3.818136000 | -1.052817000 |
| 1  | -0.963711000 | -4.571880000 | -0.748924000 |
| 6  | 3.195623000  | 1.748842000  | -1.588307000 |
| 1  | 3.154565000  | 1.920034000  | -2.672310000 |
| 6  | 4.638091000  | 1.656570000  | -1.140740000 |
| 1  | 5.155809000  | 2.601460000  | -1.340959000 |
| 1  | 4.708750000  | 1.474617000  | -0.063895000 |
| 1  | 5.184529000  | 0.861716000  | -1.655846000 |
| 6  | 2.424937000  | 2.824311000  | -0.863805000 |
| 1  | 2.377206000  | 2.626694000  | 0.211648000  |
| 1  | 2.913647000  | 3.796611000  | -0.997799000 |
| 1  | 1.400047000  | 2.910954000  | -1.231562000 |
| 6  | -3.804753000 | 1.409923000  | -2.622460000 |
| 1  | -3.479207000 | 2.035897000  | -3.458368000 |
| 1  | -3.454168000 | 0.386797000  | -2.808039000 |

|   |              |              |              |
|---|--------------|--------------|--------------|
| 1 | -4.899141000 | 1.386013000  | -2.630060000 |
| 6 | -3.748464000 | 1.058631000  | -0.131848000 |
| 1 | -3.327533000 | 1.391849000  | 0.820348000  |
| 1 | -4.840748000 | 1.093863000  | -0.044086000 |
| 1 | -3.460206000 | 0.012833000  | -0.275612000 |
| 6 | 0.277246000  | -4.106753000 | -2.450065000 |
| 1 | 0.833160000  | -5.049561000 | -2.470555000 |
| 1 | -0.533437000 | -4.181483000 | -3.180697000 |
| 1 | 0.961828000  | -3.316183000 | -2.782838000 |
| 6 | 0.885811000  | -3.721199000 | -0.039996000 |
| 1 | 1.618317000  | -2.961867000 | -0.331134000 |
| 1 | 0.518623000  | -3.464305000 | 0.956886000  |
| 1 | 1.412403000  | -4.679928000 | 0.035564000  |
| 6 | -0.010323000 | 0.071715000  | 0.605067000  |

[1e''<sub>ssi</sub>] (TE = -3476.343678)

|   |              |              |              |
|---|--------------|--------------|--------------|
| 6 | -0.848957000 | 1.714123000  | 1.200441000  |
| 6 | -0.763924000 | 2.292652000  | 2.474550000  |
| 1 | -0.194520000 | 1.783913000  | 3.253534000  |
| 6 | -1.375503000 | 3.506048000  | 2.776380000  |
| 1 | -1.285880000 | 3.930114000  | 3.774858000  |
| 6 | -2.095548000 | 4.181384000  | 1.795553000  |
| 1 | -2.571118000 | 5.133993000  | 2.019419000  |
| 6 | -2.186878000 | 3.646293000  | 0.514367000  |
| 1 | -2.722853000 | 4.182913000  | -0.266792000 |
| 6 | -1.568953000 | 2.429692000  | 0.225743000  |
| 6 | -1.002861000 | -1.372258000 | 1.387512000  |
| 6 | -1.461849000 | -1.469498000 | 2.708868000  |
| 1 | -1.238404000 | -0.664256000 | 3.410088000  |
| 6 | -2.207662000 | -2.556968000 | 3.154503000  |
| 1 | -2.552358000 | -2.597777000 | 4.186200000  |
| 6 | -2.520244000 | -3.588738000 | 2.274727000  |
| 1 | -3.109755000 | -4.439347000 | 2.610454000  |
| 6 | -2.096354000 | -3.519172000 | 0.951281000  |
| 1 | -2.361126000 | -4.307837000 | 0.248839000  |
| 6 | -1.349940000 | -2.423308000 | 0.518188000  |
| 6 | 1.772722000  | -0.023188000 | 1.230831000  |
| 6 | 2.183248000  | -0.368347000 | 2.525771000  |
| 1 | 1.431856000  | -0.483037000 | 3.308105000  |
| 6 | 3.518949000  | -0.601195000 | 2.842279000  |
| 1 | 3.800288000  | -0.878233000 | 3.856690000  |
| 6 | 4.490887000  | -0.499960000 | 1.852991000  |
| 1 | 5.535270000  | -0.699327000 | 2.083727000  |
| 6 | 4.121269000  | -0.164123000 | 0.553556000  |

|    |              |              |              |
|----|--------------|--------------|--------------|
| 1  | 4.871008000  | -0.114338000 | -0.233216000 |
| 6  | 2.780454000  | 0.078538000  | 0.250373000  |
| 16 | 2.378586000  | 0.435355000  | -1.489393000 |
| 16 | -1.683365000 | 1.827769000  | -1.487393000 |
| 16 | -0.887117000 | -2.384663000 | -1.240264000 |
| 23 | -0.072562000 | -0.076370000 | -1.760388000 |
| 6  | -3.486184000 | 1.274428000  | -1.493154000 |
| 1  | -4.051898000 | 2.194120000  | -1.298906000 |
| 6  | 0.473105000  | -3.691814000 | -1.221308000 |
| 1  | -0.038795000 | -4.607479000 | -0.900161000 |
| 6  | 2.775008000  | 2.279548000  | -1.571418000 |
| 1  | 2.452270000  | 2.498526000  | -2.597973000 |
| 6  | 4.261587000  | 2.530859000  | -1.433047000 |
| 1  | 4.487518000  | 3.582626000  | -1.642573000 |
| 1  | 4.605041000  | 2.327761000  | -0.414013000 |
| 1  | 4.852534000  | 1.917745000  | -2.118706000 |
| 6  | 1.952972000  | 3.080437000  | -0.589192000 |
| 1  | 2.176147000  | 2.796961000  | 0.445404000  |
| 1  | 2.173728000  | 4.149155000  | -0.689834000 |
| 1  | 0.881723000  | 2.941997000  | -0.747506000 |
| 6  | -3.772543000 | 0.761016000  | -2.887300000 |
| 1  | -3.591558000 | 1.517203000  | -3.656407000 |
| 1  | -3.142274000 | -0.110187000 | -3.111251000 |
| 1  | -4.814912000 | 0.437522000  | -2.971552000 |
| 6  | -3.766338000 | 0.241210000  | -0.426753000 |
| 1  | -3.496624000 | 0.587237000  | 0.575236000  |
| 1  | -4.833300000 | -0.009327000 | -0.416162000 |
| 1  | -3.210822000 | -0.681706000 | -0.620602000 |
| 6  | 0.957844000  | -3.828465000 | -2.647998000 |
| 1  | 1.739177000  | -4.592074000 | -2.717205000 |
| 1  | 0.155178000  | -4.104652000 | -3.337598000 |
| 1  | 1.395334000  | -2.883101000 | -2.996209000 |
| 6  | 1.587234000  | -3.339480000 | -0.263680000 |
| 1  | 2.104500000  | -2.430096000 | -0.584779000 |
| 1  | 1.228614000  | -3.175033000 | 0.756563000  |
| 1  | 2.326511000  | -4.148057000 | -0.230434000 |
| 14 | -0.035036000 | 0.087637000  | 0.625723000  |

$[1f'_{SB}]$  (TE = -3211.719426)

|   |             |             |             |
|---|-------------|-------------|-------------|
| 6 | 0.248550000 | 1.494728000 | 0.860118000 |
| 6 | 1.428270000 | 1.911551000 | 1.581960000 |
| 1 | 1.842672000 | 1.198552000 | 2.294410000 |
| 6 | 1.993233000 | 3.156226000 | 1.510788000 |
| 1 | 2.840320000 | 3.398750000 | 2.151606000 |
| 6 | 1.473971000 | 4.138763000 | 0.629270000 |

|    |              |              |              |
|----|--------------|--------------|--------------|
| 1  | 1.923135000  | 5.127305000  | 0.568957000  |
| 6  | 0.395002000  | 3.816222000  | -0.147513000 |
| 1  | -0.029170000 | 4.548323000  | -0.832574000 |
| 6  | -0.213834000 | 2.524801000  | -0.088449000 |
| 6  | -1.622503000 | -0.648911000 | 0.924114000  |
| 6  | -2.398714000 | -0.679369000 | 2.098415000  |
| 1  | -2.048253000 | -0.118855000 | 2.965936000  |
| 6  | -3.583454000 | -1.401448000 | 2.199390000  |
| 1  | -4.148079000 | -1.393459000 | 3.130101000  |
| 6  | -4.047691000 | -2.135778000 | 1.110588000  |
| 1  | -4.974626000 | -2.701075000 | 1.177990000  |
| 6  | -3.326620000 | -2.120017000 | -0.076900000 |
| 1  | -3.695580000 | -2.656177000 | -0.949886000 |
| 6  | -2.138598000 | -1.391226000 | -0.153402000 |
| 6  | 0.963683000  | -1.002171000 | 1.400314000  |
| 6  | 0.818189000  | -1.751269000 | 2.583977000  |
| 1  | -0.092290000 | -1.619451000 | 3.168774000  |
| 6  | 1.780589000  | -2.642395000 | 3.041164000  |
| 1  | 1.620798000  | -3.185600000 | 3.971073000  |
| 6  | 2.944365000  | -2.851916000 | 2.303845000  |
| 1  | 3.697373000  | -3.560733000 | 2.641088000  |
| 6  | 3.113298000  | -2.173624000 | 1.104472000  |
| 1  | 3.980029000  | -2.380483000 | 0.478894000  |
| 6  | 2.149999000  | -1.256294000 | 0.677799000  |
| 16 | 2.303409000  | -0.614086000 | -1.003097000 |
| 16 | -1.644699000 | 2.303817000  | -1.125625000 |
| 16 | -1.294718000 | -1.303159000 | -1.740565000 |
| 23 | 0.162747000  | 0.638930000  | -1.231559000 |
| 6  | -3.248407000 | 2.546958000  | -0.138713000 |
| 1  | -3.631284000 | 3.470642000  | -0.589771000 |
| 6  | -0.718534000 | -3.059571000 | -2.011828000 |
| 1  | -1.651405000 | -3.613079000 | -2.178022000 |
| 6  | 3.803293000  | 0.526374000  | -1.094169000 |
| 1  | 4.462676000  | 0.007688000  | -1.799786000 |
| 6  | 4.509271000  | 0.695860000  | 0.230236000  |
| 1  | 5.348670000  | 1.388437000  | 0.102633000  |
| 1  | 3.843690000  | 1.117163000  | 0.986293000  |
| 1  | 4.912545000  | -0.240996000 | 0.617991000  |
| 6  | 3.348427000  | 1.841093000  | -1.695377000 |
| 1  | 2.695532000  | 2.388352000  | -1.008617000 |
| 1  | 4.213676000  | 2.478345000  | -1.911705000 |
| 1  | 2.809721000  | 1.698286000  | -2.639045000 |
| 6  | -4.224748000 | 1.421885000  | -0.395858000 |
| 1  | -4.331172000 | 1.199080000  | -1.461964000 |
| 1  | -3.928390000 | 0.504444000  | 0.112852000  |
| 1  | -5.216550000 | 1.702352000  | -0.021918000 |



|   |              |              |              |
|---|--------------|--------------|--------------|
| 6 | -2.943573000 | 2.783997000  | 1.320580000  |
| 1 | -2.280294000 | 3.639994000  | 1.469211000  |
| 1 | -3.875038000 | 2.982245000  | 1.863497000  |
| 1 | -2.468829000 | 1.913321000  | 1.776758000  |
| 6 | 0.109638000  | -3.056454000 | -3.280479000 |
| 1 | 0.416004000  | -4.076689000 | -3.532072000 |
| 1 | -0.439587000 | -2.654004000 | -4.136132000 |
| 1 | 1.021289000  | -2.463773000 | -3.149100000 |
| 6 | 0.020355000  | -3.634062000 | -0.825261000 |
| 1 | 0.992556000  | -3.155763000 | -0.689487000 |
| 1 | -0.538611000 | -3.526333000 | 0.108088000  |
| 1 | 0.196939000  | -4.703815000 | -0.985557000 |
| 5 | -0.167249000 | 0.016549000  | 0.903890000  |

{[HIPTN<sub>3</sub>N]-V} (TE = -2093.484933)

|    |              |              |              |
|----|--------------|--------------|--------------|
| 23 | 0.415341000  | 0.537039000  | -0.265360000 |
| 7  | -0.813317000 | 1.043539000  | -1.698260000 |
| 7  | 2.377982000  | 0.410894000  | -0.338327000 |
| 7  | -0.489050000 | 0.843160000  | 1.425721000  |
| 6  | -1.385287000 | 2.340613000  | -1.379024000 |
| 1  | -1.963074000 | 2.756484000  | -2.220391000 |
| 1  | -2.093125000 | 2.276385000  | -0.534210000 |
| 6  | -0.241262000 | 3.289940000  | -1.042615000 |
| 1  | 0.256363000  | 3.599116000  | -1.965295000 |
| 1  | -0.603329000 | 4.201062000  | -0.550356000 |
| 6  | -0.536040000 | 2.233100000  | 1.844230000  |
| 1  | -1.464482000 | 2.732472000  | 1.516119000  |
| 1  | -0.518812000 | 2.332518000  | 2.940782000  |
| 6  | 0.667363000  | 2.941053000  | 1.253100000  |
| 1  | 1.577756000  | 2.577090000  | 1.739714000  |
| 1  | 0.621692000  | 4.029459000  | 1.402264000  |
| 6  | 3.072338000  | 1.677120000  | -0.200182000 |
| 1  | 3.384332000  | 1.858704000  | 0.844436000  |
| 1  | 4.003122000  | 1.704773000  | -0.789293000 |
| 6  | 2.168883000  | 2.789165000  | -0.702098000 |
| 1  | 2.563337000  | 3.784579000  | -0.448973000 |
| 1  | 2.101867000  | 2.725261000  | -1.791970000 |
| 7  | 0.786026000  | 2.616516000  | -0.189460000 |
| 6  | 3.094797000  | -0.741918000 | -0.070154000 |
| 6  | 2.459338000  | -1.992130000 | -0.235186000 |
| 6  | 4.430859000  | -0.756091000 | 0.377017000  |
| 6  | 3.109393000  | -3.180613000 | 0.045573000  |
| 1  | 1.433911000  | -2.019231000 | -0.612595000 |
| 6  | 5.079004000  | -1.957119000 | 0.649324000  |
| 1  | 4.966882000  | 0.177839000  | 0.521760000  |

|   |              |              |              |
|---|--------------|--------------|--------------|
| 6 | 4.431755000  | -3.177196000 | 0.493291000  |
| 1 | 2.582725000  | -4.122709000 | -0.094653000 |
| 1 | 6.111219000  | -1.932017000 | 0.994985000  |
| 1 | 4.945181000  | -4.110287000 | 0.709935000  |
| 6 | -1.669541000 | -0.022280000 | -1.922348000 |
| 6 | -1.080876000 | -1.263445000 | -2.258401000 |
| 6 | -3.069932000 | 0.017036000  | -1.766017000 |
| 6 | -1.846638000 | -2.414866000 | -2.371952000 |
| 1 | -0.011294000 | -1.289491000 | -2.474061000 |
| 6 | -3.824865000 | -1.141142000 | -1.897383000 |
| 1 | -3.564185000 | 0.953712000  | -1.521545000 |
| 6 | -3.226576000 | -2.365422000 | -2.187618000 |
| 1 | -1.362435000 | -3.355308000 | -2.628710000 |
| 1 | -4.903216000 | -1.087072000 | -1.758065000 |
| 1 | -3.829374000 | -3.264939000 | -2.281975000 |
| 6 | -1.511959000 | -0.001384000 | 1.833802000  |
| 6 | -1.403371000 | -1.378255000 | 1.545528000  |
| 6 | -2.682679000 | 0.437777000  | 2.479607000  |
| 6 | -2.433943000 | -2.256761000 | 1.831951000  |
| 1 | -0.478417000 | -1.762651000 | 1.108495000  |
| 6 | -3.704250000 | -0.457487000 | 2.780335000  |
| 1 | -2.800612000 | 1.486341000  | 2.740106000  |
| 6 | -3.598969000 | -1.804373000 | 2.451635000  |
| 1 | -2.321234000 | -3.309706000 | 1.581500000  |
| 1 | -4.600278000 | -0.089048000 | 3.277061000  |
| 1 | -4.404126000 | -2.495926000 | 2.686003000  |

Cartesian coordinates of  $[1a'_{PC}]-[1f'_{SB}]$  and  $[1a''_{PC}]-[1f''_{SB}]$  along with their total energies (in hartree) including zero point vibrational correction at M06-D3(heptane)/def2-SVP level of theory.

$[1a'_{PC}]$  (TE = -2950.485167)

|   |              |              |              |
|---|--------------|--------------|--------------|
| 6 | -0.057442000 | 2.458634000  | 1.778219000  |
| 6 | 0.505181000  | 1.212256000  | 2.453192000  |
| 6 | -2.612267000 | -0.074047000 | 1.618040000  |
| 6 | -1.402352000 | -0.440843000 | 2.477688000  |
| 6 | 2.292719000  | -1.293180000 | 1.672674000  |
| 6 | 0.953696000  | -1.221646000 | 2.402530000  |
| 1 | -2.719009000 | 1.022004000  | 1.503653000  |
| 1 | -1.543475000 | 0.015164000  | 3.486817000  |
| 1 | 2.927379000  | -2.117849000 | 2.050743000  |
| 1 | 1.158683000  | -1.121328000 | 3.498075000  |
| 1 | 0.319458000  | 3.389145000  | 2.242054000  |
| 1 | 1.610501000  | 1.254722000  | 2.359286000  |
| 6 | -0.613935000 | 3.837571000  | -0.783356000 |
| 1 | 0.032786000  | 4.164628000  | -1.621972000 |

|    |              |              |              |
|----|--------------|--------------|--------------|
| 6  | -2.710114000 | -2.554327000 | 0.046900000  |
| 1  | -1.964240000 | -2.800706000 | 0.831704000  |
| 6  | 3.629967000  | -0.699738000 | -0.854853000 |
| 1  | 3.452573000  | 0.373565000  | -0.641539000 |
| 23 | -0.020628000 | -0.052825000 | -0.331807000 |
| 6  | -0.003887000 | -0.128445000 | 1.907217000  |
| 1  | -1.160035000 | 2.486927000  | 1.869926000  |
| 1  | 0.317468000  | 1.291053000  | 3.552574000  |
| 1  | 0.457986000  | -2.204770000 | 2.296433000  |
| 1  | 2.872883000  | -0.363411000 | 1.830186000  |
| 1  | -1.472831000 | -1.531962000 | 2.664726000  |
| 1  | -3.552526000 | -0.434432000 | 2.078796000  |
| 6  | 4.953315000  | -1.073621000 | -0.204074000 |
| 1  | 5.752424000  | -0.404866000 | -0.570496000 |
| 1  | 4.925721000  | -0.974114000 | 0.892744000  |
| 1  | 5.266027000  | -2.102181000 | -0.438374000 |
| 6  | 3.665527000  | -0.863505000 | -2.366135000 |
| 1  | 3.870932000  | -1.908236000 | -2.659355000 |
| 1  | 2.706071000  | -0.572938000 | -2.830371000 |
| 1  | 4.457188000  | -0.238680000 | -2.815704000 |
| 6  | -4.073774000 | -3.018239000 | 0.529965000  |
| 1  | -4.039908000 | -4.087284000 | 0.804599000  |
| 1  | -4.425125000 | -2.464019000 | 1.415786000  |
| 1  | -4.838667000 | -2.917800000 | -0.258594000 |
| 6  | -2.285006000 | -3.276983000 | -1.223721000 |
| 1  | -3.014964000 | -3.132433000 | -2.038637000 |
| 1  | -1.305213000 | -2.907064000 | -1.578132000 |
| 1  | -2.197688000 | -4.364188000 | -1.051908000 |
| 6  | -1.934050000 | 3.349761000  | -1.358933000 |
| 1  | -1.799008000 | 2.495752000  | -2.044376000 |
| 1  | -2.607001000 | 3.016241000  | -0.546662000 |
| 1  | -2.457038000 | 4.155455000  | -1.903101000 |
| 6  | -0.852798000 | 5.017503000  | 0.147676000  |
| 1  | 0.070722000  | 5.415674000  | 0.592592000  |
| 1  | -1.342547000 | 5.844134000  | -0.396545000 |
| 1  | -1.526034000 | 4.736935000  | 0.975676000  |
| 6  | 2.063199000  | -3.250187000 | -0.559681000 |
| 1  | 1.780500000  | -3.267344000 | -1.632356000 |
| 6  | 0.955325000  | -3.935964000 | 0.227775000  |
| 1  | 1.259991000  | -4.096464000 | 1.277135000  |
| 1  | 0.035732000  | -3.327285000 | 0.236281000  |
| 1  | 0.718204000  | -4.925543000 | -0.199628000 |
| 6  | 3.374977000  | -3.998105000 | -0.387726000 |
| 1  | 3.219185000  | -5.080444000 | -0.544181000 |
| 1  | 4.148591000  | -3.677717000 | -1.101590000 |
| 1  | 3.782650000  | -3.877451000 | 0.631716000  |

|    |              |              |              |
|----|--------------|--------------|--------------|
| 6  | -3.826145000 | 0.082567000  | -1.015797000 |
| 1  | -3.500769000 | 1.140036000  | -0.970774000 |
| 6  | -5.210223000 | 0.003297000  | -0.390893000 |
| 1  | -5.641694000 | -1.007164000 | -0.463980000 |
| 1  | -5.213282000 | 0.294290000  | 0.671608000  |
| 1  | -5.900701000 | 0.685708000  | -0.917503000 |
| 6  | -3.845537000 | -0.325429000 | -2.480887000 |
| 1  | -4.216501000 | -1.357505000 | -2.609016000 |
| 1  | -4.514787000 | 0.330453000  | -3.064134000 |
| 1  | -2.840710000 | -0.272188000 | -2.935566000 |
| 6  | 2.117734000  | 2.914391000  | -0.145603000 |
| 1  | 2.602879000  | 2.120680000  | 0.459736000  |
| 6  | 2.507295000  | 4.266648000  | 0.423868000  |
| 1  | 3.605004000  | 4.386585000  | 0.411953000  |
| 1  | 2.091636000  | 5.094564000  | -0.176531000 |
| 1  | 2.177779000  | 4.400913000  | 1.467100000  |
| 6  | 2.591008000  | 2.757079000  | -1.582939000 |
| 1  | 3.689777000  | 2.841896000  | -1.656040000 |
| 1  | 2.296441000  | 1.773902000  | -1.990671000 |
| 1  | 2.161886000  | 3.535385000  | -2.239170000 |
| 15 | -2.388605000 | -0.708956000 | -0.107442000 |
| 15 | 0.317387000  | 2.381849000  | -0.034559000 |
| 15 | 2.031527000  | -1.405303000 | -0.162019000 |

[1b'<sub>psi</sub>] (TE = -3201.859420)

|    |              |              |              |
|----|--------------|--------------|--------------|
| 6  | -0.106651000 | 2.744280000  | 1.722550000  |
| 6  | 0.414624000  | 1.672840000  | 2.677698000  |
| 6  | -2.809897000 | -0.290589000 | 1.717208000  |
| 6  | -1.689602000 | -0.667954000 | 2.686883000  |
| 6  | 2.531361000  | -1.343504000 | 1.613478000  |
| 6  | 1.388408000  | -1.290473000 | 2.629171000  |
| 1  | -2.966764000 | 0.807080000  | 1.717597000  |
| 1  | -1.918473000 | -0.279510000 | 3.697688000  |
| 1  | 3.264087000  | -2.147812000 | 1.824155000  |
| 1  | 1.788965000  | -1.024561000 | 3.626017000  |
| 1  | 0.204112000  | 3.767346000  | 2.005858000  |
| 1  | 1.517804000  | 1.753460000  | 2.763495000  |
| 6  | -0.467006000 | 3.824884000  | -0.979332000 |
| 1  | 0.196937000  | 3.985304000  | -1.851937000 |
| 6  | -2.720295000 | -2.538528000 | -0.147267000 |
| 1  | -2.083692000 | -2.878943000 | 0.695495000  |
| 6  | 3.528200000  | -0.834800000 | -1.059806000 |
| 1  | 3.439430000  | 0.247479000  | -0.837885000 |
| 23 | -0.040602000 | -0.022261000 | -0.488790000 |
| 1  | -1.215406000 | 2.750546000  | 1.721943000  |
| 1  | 0.019602000  | 1.846931000  | 3.697102000  |

|   |              |              |              |
|---|--------------|--------------|--------------|
| 1 | 0.929250000  | -2.290112000 | 2.741011000  |
| 1 | 3.104503000  | -0.394974000 | 1.654541000  |
| 1 | -1.644889000 | -1.770783000 | 2.791958000  |
| 1 | -3.784790000 | -0.738510000 | 1.991709000  |
| 6 | 4.902905000  | -1.276550000 | -0.580449000 |
| 1 | 5.681515000  | -0.658522000 | -1.062142000 |
| 1 | 5.027234000  | -1.161783000 | 0.507766000  |
| 1 | 5.126013000  | -2.323863000 | -0.833671000 |
| 6 | 3.363218000  | -1.002629000 | -2.561618000 |
| 1 | 3.469878000  | -2.057699000 | -2.870324000 |
| 1 | 2.368384000  | -0.657829000 | -2.899001000 |
| 1 | 4.123193000  | -0.423005000 | -3.114604000 |
| 6 | -4.132439000 | -3.040889000 | 0.101081000  |
| 1 | -4.131349000 | -4.137565000 | 0.230912000  |
| 1 | -4.590267000 | -2.606091000 | 1.004479000  |
| 1 | -4.794779000 | -2.823249000 | -0.753960000 |
| 6 | -2.135341000 | -3.121782000 | -1.425213000 |
| 1 | -2.754737000 | -2.874713000 | -2.304906000 |
| 1 | -1.119166000 | -2.723698000 | -1.606195000 |
| 1 | -2.068565000 | -4.222531000 | -1.368551000 |
| 6 | -1.823559000 | 3.367284000  | -1.494021000 |
| 1 | -1.750681000 | 2.434601000  | -2.078648000 |
| 1 | -2.512529000 | 3.171988000  | -0.650133000 |
| 1 | -2.294883000 | 4.140095000  | -2.126094000 |
| 6 | -0.614552000 | 5.138736000  | -0.224979000 |
| 1 | 0.331841000  | 5.515158000  | 0.190198000  |
| 1 | -1.016406000 | 5.920113000  | -0.893882000 |
| 1 | -1.327984000 | 5.039060000  | 0.610702000  |
| 6 | 1.873295000  | -3.292018000 | -0.527672000 |
| 1 | 1.483323000  | -3.315418000 | -1.565952000 |
| 6 | 0.815807000  | -3.898429000 | 0.384200000  |
| 1 | 1.210177000  | -4.033089000 | 1.406865000  |
| 1 | -0.074878000 | -3.251543000 | 0.450069000  |
| 1 | 0.500673000  | -4.891899000 | 0.020521000  |
| 6 | 3.153181000  | -4.109274000 | -0.469476000 |
| 1 | 2.922223000  | -5.184210000 | -0.576453000 |
| 1 | 3.862968000  | -3.851273000 | -1.269603000 |
| 1 | 3.672173000  | -3.988548000 | 0.498003000  |
| 6 | -3.797013000 | 0.195574000  | -0.962829000 |
| 1 | -3.460639000 | 1.241639000  | -0.818106000 |
| 6 | -5.215804000 | 0.091638000  | -0.424987000 |
| 1 | -5.651024000 | -0.906996000 | -0.585385000 |
| 1 | -5.279945000 | 0.317208000  | 0.651090000  |
| 1 | -5.868607000 | 0.813707000  | -0.946976000 |
| 6 | -3.739777000 | -0.097632000 | -2.454058000 |
| 1 | -4.120198000 | -1.109050000 | -2.682164000 |

|    |              |              |              |
|----|--------------|--------------|--------------|
| 1  | -4.359118000 | 0.616702000  | -3.023856000 |
| 1  | -2.708008000 | -0.035090000 | -2.844526000 |
| 6  | 2.187940000  | 2.808614000  | -0.124826000 |
| 1  | 2.606859000  | 1.964141000  | 0.461087000  |
| 6  | 2.663433000  | 4.110824000  | 0.494716000  |
| 1  | 3.766952000  | 4.141091000  | 0.523179000  |
| 1  | 2.338439000  | 4.982863000  | -0.098692000 |
| 1  | 2.307344000  | 4.248493000  | 1.528578000  |
| 6  | 2.679394000  | 2.666661000  | -1.557713000 |
| 1  | 3.782588000  | 2.640666000  | -1.602985000 |
| 1  | 2.297098000  | 1.737452000  | -2.017694000 |
| 1  | 2.351070000  | 3.514168000  | -2.185181000 |
| 15 | -2.399949000 | -0.684579000 | -0.060625000 |
| 15 | 0.350645000  | 2.396135000  | -0.053662000 |
| 15 | 1.979922000  | -1.439419000 | -0.174760000 |
| 14 | 0.019908000  | -0.093014000 | 1.988493000  |

[1c'<sub>pb</sub>] (TE = -2937.272954)

|    |              |              |              |
|----|--------------|--------------|--------------|
| 6  | 0.247604000  | 2.435721000  | 1.962589000  |
| 6  | 0.711184000  | 1.182979000  | 2.700839000  |
| 6  | -2.605764000 | 0.251189000  | 1.701045000  |
| 6  | -1.568259000 | -0.368673000 | 2.637596000  |
| 6  | 2.196729000  | -1.563759000 | 1.633696000  |
| 6  | 0.896502000  | -1.530449000 | 2.430866000  |
| 1  | -2.464925000 | 1.344906000  | 1.617596000  |
| 1  | -1.730647000 | 0.054385000  | 3.652886000  |
| 1  | 2.865757000  | -2.392101000 | 1.928271000  |
| 1  | 1.143106000  | -1.640630000 | 3.511441000  |
| 1  | 0.656611000  | 3.375758000  | 2.380758000  |
| 1  | 1.815611000  | 1.107306000  | 2.629149000  |
| 6  | -0.078096000 | 3.801713000  | -0.659594000 |
| 1  | 0.649664000  | 4.631314000  | -0.568286000 |
| 6  | -3.022874000 | -2.146462000 | 0.087848000  |
| 1  | -2.143211000 | -2.626746000 | 0.564136000  |
| 6  | 3.498433000  | -1.112530000 | -0.932006000 |
| 1  | 3.641397000  | -0.101898000 | -0.496738000 |
| 23 | -0.002012000 | 0.000362000  | -0.427266000 |
| 1  | -0.850759000 | 2.523027000  | 2.024866000  |
| 1  | 0.510496000  | 1.324408000  | 3.785793000  |
| 1  | 0.292917000  | -2.429142000 | 2.185118000  |
| 1  | 2.772873000  | -0.630812000 | 1.791366000  |
| 1  | -1.801529000 | -1.448472000 | 2.742077000  |
| 1  | -3.643502000 | 0.097527000  | 2.055796000  |
| 6  | 4.692276000  | -1.976623000 | -0.565010000 |
| 1  | 5.623196000  | -1.548922000 | -0.977344000 |
| 1  | 4.827914000  | -2.066722000 | 0.525038000  |

|   |              |              |              |
|---|--------------|--------------|--------------|
| 1 | 4.598897000  | -2.995132000 | -0.980983000 |
| 6 | 3.357633000  | -0.955065000 | -2.437638000 |
| 1 | 3.226687000  | -1.930822000 | -2.938994000 |
| 1 | 2.483460000  | -0.329799000 | -2.695331000 |
| 1 | 4.253593000  | -0.482543000 | -2.876833000 |
| 6 | -4.233947000 | -2.418935000 | 0.965294000  |
| 1 | -4.421110000 | -3.506032000 | 1.020436000  |
| 1 | -4.093868000 | -2.063255000 | 1.998314000  |
| 1 | -5.151145000 | -1.954080000 | 0.569619000  |
| 6 | -3.181306000 | -2.750721000 | -1.298687000 |
| 1 | -4.098729000 | -2.389104000 | -1.795864000 |
| 1 | -2.325423000 | -2.503773000 | -1.951231000 |
| 1 | -3.254532000 | -3.850924000 | -1.244485000 |
| 6 | -0.311909000 | 3.485609000  | -2.130720000 |
| 1 | 0.612291000  | 3.199858000  | -2.658889000 |
| 1 | -1.015944000 | 2.635480000  | -2.215588000 |
| 1 | -0.752805000 | 4.346032000  | -2.663321000 |
| 6 | -1.385024000 | 4.214568000  | -0.003028000 |
| 1 | -1.251779000 | 4.578758000  | 1.027131000  |
| 1 | -1.875354000 | 5.016355000  | -0.581332000 |
| 1 | -2.087221000 | 3.359632000  | 0.028758000  |
| 6 | 1.720022000  | -3.434358000 | -0.652020000 |
| 1 | 2.303341000  | -3.508038000 | -1.591596000 |
| 6 | 0.275730000  | -3.784763000 | -0.969075000 |
| 1 | -0.356440000 | -3.703384000 | -0.065203000 |
| 1 | -0.152060000 | -3.097799000 | -1.718712000 |
| 1 | 0.187320000  | -4.818097000 | -1.348782000 |
| 6 | 2.301514000  | -4.410039000 | 0.358368000  |
| 1 | 2.219762000  | -5.445169000 | -0.017328000 |
| 1 | 3.364208000  | -4.222922000 | 0.577897000  |
| 1 | 1.750070000  | -4.370159000 | 1.313878000  |
| 6 | -3.620320000 | 0.644111000  | -1.000652000 |
| 1 | -3.320553000 | 1.661624000  | -0.672867000 |
| 6 | -5.097284000 | 0.461413000  | -0.695046000 |
| 1 | -5.465206000 | -0.518009000 | -1.045885000 |
| 1 | -5.321204000 | 0.541727000  | 0.381002000  |
| 1 | -5.695848000 | 1.231090000  | -1.213482000 |
| 6 | -3.337341000 | 0.552617000  | -2.493346000 |
| 1 | -3.638264000 | -0.424356000 | -2.907894000 |
| 1 | -3.889022000 | 1.329420000  | -3.050771000 |
| 1 | -2.260550000 | 0.684601000  | -2.704312000 |
| 6 | 2.508648000  | 2.634461000  | 0.154877000  |
| 1 | 2.903430000  | 1.727207000  | 0.657192000  |
| 6 | 2.960353000  | 3.858161000  | 0.931776000  |
| 1 | 4.054904000  | 3.982248000  | 0.855113000  |
| 1 | 2.506031000  | 4.785258000  | 0.538646000  |

|    |              |              |              |
|----|--------------|--------------|--------------|
| 1  | 2.715672000  | 3.791593000  | 2.003585000  |
| 6  | 3.038668000  | 2.642607000  | -1.269743000 |
| 1  | 4.142372000  | 2.612145000  | -1.284206000 |
| 1  | 2.669107000  | 1.769641000  | -1.836449000 |
| 1  | 2.733442000  | 3.555254000  | -1.812307000 |
| 15 | -2.385004000 | -0.379169000 | -0.025445000 |
| 15 | 0.658943000  | 2.276118000  | 0.161841000  |
| 15 | 1.845919000  | -1.599564000 | -0.187636000 |
| 5  | 0.001372000  | -0.202687000 | 2.279101000  |

[1d'<sub>sc</sub>] (TE = -2766.135508)

|    |              |              |              |
|----|--------------|--------------|--------------|
| 6  | 1.016393000  | 2.003803000  | 1.590402000  |
| 6  | 0.754570000  | 0.675167000  | 2.279475000  |
| 6  | -2.448368000 | 1.179390000  | 0.904703000  |
| 6  | -1.729800000 | 0.351446000  | 1.965338000  |
| 6  | 1.018009000  | -2.368050000 | 1.556016000  |
| 6  | -0.205407000 | -1.630602000 | 2.072380000  |
| 1  | -1.966144000 | 2.157712000  | 0.739821000  |
| 1  | -1.726470000 | 0.969569000  | 2.894687000  |
| 1  | 1.035219000  | -3.419459000 | 1.889360000  |
| 1  | -0.197033000 | -1.742932000 | 3.187212000  |
| 1  | 1.769913000  | 2.608009000  | 2.124888000  |
| 1  | 1.716875000  | 0.124555000  | 2.308604000  |
| 6  | 1.322076000  | 3.287668000  | -0.974604000 |
| 1  | 1.745830000  | 3.067666000  | -1.972215000 |
| 6  | -3.517724000 | -1.078621000 | -0.468265000 |
| 1  | -3.296348000 | -1.390059000 | 0.568314000  |
| 6  | 2.897769000  | -1.978481000 | -0.543919000 |
| 1  | 3.115235000  | -1.135338000 | 0.140310000  |
| 23 | -0.043575000 | -0.134165000 | -0.546926000 |
| 16 | -2.426532000 | 0.417708000  | -0.771457000 |
| 16 | 1.632800000  | 1.664471000  | -0.113255000 |
| 16 | 1.085472000  | -2.332987000 | -0.290228000 |
| 6  | -0.328156000 | -0.175666000 | 1.619496000  |
| 1  | 0.089384000  | 2.599821000  | 1.513057000  |
| 1  | 0.521577000  | 0.899669000  | 3.350447000  |
| 1  | -1.100843000 | -2.191308000 | 1.734663000  |
| 1  | 1.953774000  | -1.896663000 | 1.904160000  |
| 1  | -2.392000000 | -0.499919000 | 2.220155000  |
| 1  | -3.499671000 | 1.381581000  | 1.183684000  |
| 6  | 3.746250000  | -3.185396000 | -0.211856000 |
| 1  | 4.817996000  | -2.959027000 | -0.349232000 |
| 1  | 3.606325000  | -3.515705000 | 0.829887000  |
| 1  | 3.489078000  | -4.031128000 | -0.872307000 |
| 6  | 3.066283000  | -1.515539000 | -1.974285000 |
| 1  | 2.764215000  | -2.304326000 | -2.685955000 |



|   |              |              |              |
|---|--------------|--------------|--------------|
| 1 | 2.454973000  | -0.616138000 | -2.167748000 |
| 1 | 4.119842000  | -1.263114000 | -2.180059000 |
| 6 | -4.975270000 | -0.701414000 | -0.615553000 |
| 1 | -5.627798000 | -1.566942000 | -0.405576000 |
| 1 | -5.265474000 | 0.108208000  | 0.073342000  |
| 1 | -5.185696000 | -0.360429000 | -1.643687000 |
| 6 | -3.080202000 | -2.165665000 | -1.422248000 |
| 1 | -3.221123000 | -1.852601000 | -2.472916000 |
| 1 | -2.010387000 | -2.399054000 | -1.271935000 |
| 1 | -3.668299000 | -3.085562000 | -1.265552000 |
| 6 | -0.150511000 | 3.597710000  | -1.119851000 |
| 1 | -0.703336000 | 2.723455000  | -1.506880000 |
| 1 | -0.599731000 | 3.881252000  | -0.151497000 |
| 1 | -0.303520000 | 4.447267000  | -1.806749000 |
| 6 | 2.109413000  | 4.409452000  | -0.330947000 |
| 1 | 3.175876000  | 4.153352000  | -0.232033000 |
| 1 | 2.031213000  | 5.331789000  | -0.931789000 |
| 1 | 1.718976000  | 4.643325000  | 0.674210000  |

[1e'<sub>ssi</sub>] (TE = -3017.497547)

|    |              |              |              |
|----|--------------|--------------|--------------|
| 23 | -0.055569000 | -0.147107000 | -0.907639000 |
| 16 | 1.796221000  | -1.819925000 | -0.992077000 |
| 16 | -2.359183000 | -1.154509000 | -1.141356000 |
| 16 | -0.187769000 | 2.029271000  | 0.254475000  |
| 14 | -0.304030000 | -0.897854000 | 1.408304000  |
| 6  | -0.222433000 | 0.592023000  | 2.633096000  |
| 6  | 0.540446000  | 1.708758000  | 1.935898000  |
| 6  | -2.474607000 | -2.350362000 | 0.269377000  |
| 6  | -1.984399000 | -1.836545000 | 1.616054000  |
| 6  | 1.162870000  | -2.102257000 | 1.779633000  |
| 6  | 1.547279000  | -2.860285000 | 0.519148000  |
| 1  | 0.738103000  | -3.541475000 | 0.200045000  |
| 1  | 2.451993000  | -3.485925000 | 0.623758000  |
| 1  | 2.019997000  | -1.492463000 | 2.129616000  |
| 1  | 0.958675000  | -2.833885000 | 2.585662000  |
| 1  | -3.513649000 | -2.726793000 | 0.285424000  |
| 1  | -1.848086000 | -3.184293000 | -0.094099000 |
| 1  | -2.724226000 | -1.129850000 | 2.039871000  |
| 1  | -1.943186000 | -2.688473000 | 2.321738000  |
| 1  | -1.254308000 | 0.929065000  | 2.852351000  |
| 1  | 0.258386000  | 0.379898000  | 3.606617000  |
| 1  | 1.597163000  | 1.419348000  | 1.783290000  |
| 1  | 0.521872000  | 2.666725000  | 2.487508000  |
| 6  | 3.327222000  | -0.854319000 | -0.549568000 |
| 1  | 3.020167000  | -0.191326000 | 0.282753000  |
| 6  | -3.465813000 | 0.220178000  | -0.565806000 |

|   |              |              |              |
|---|--------------|--------------|--------------|
| 1 | -3.000720000 | 0.609356000  | 0.359778000  |
| 6 | 0.829604000  | 3.500564000  | -0.278936000 |
| 1 | 0.524987000  | 3.576139000  | -1.339269000 |
| 6 | -4.877574000 | -0.253964000 | -0.302321000 |
| 1 | -5.516400000 | 0.597308000  | -0.009957000 |
| 1 | -5.312520000 | -0.709694000 | -1.208542000 |
| 1 | -4.928368000 | -0.993901000 | 0.512129000  |
| 6 | -3.400069000 | 1.290698000  | -1.634910000 |
| 1 | -2.350585000 | 1.576797000  | -1.829926000 |
| 1 | -3.847414000 | 0.935502000  | -2.579880000 |
| 1 | -3.946466000 | 2.193039000  | -1.314393000 |
| 6 | 0.419452000  | 4.761829000  | 0.452386000  |
| 1 | 0.666256000  | 4.702050000  | 1.526184000  |
| 1 | 0.954487000  | 5.637853000  | 0.045794000  |
| 1 | -0.661876000 | 4.948202000  | 0.363472000  |
| 6 | 2.315243000  | 3.224655000  | -0.209807000 |
| 1 | 2.884950000  | 4.004719000  | -0.743058000 |
| 1 | 2.675174000  | 3.213097000  | 0.833080000  |
| 1 | 2.551443000  | 2.247484000  | -0.664031000 |
| 6 | 3.642385000  | -0.014279000 | -1.768733000 |
| 1 | 4.453368000  | 0.701890000  | -1.554921000 |
| 1 | 3.954880000  | -0.648385000 | -2.616585000 |
| 1 | 2.746122000  | 0.558263000  | -2.075829000 |
| 6 | 4.480663000  | -1.741959000 | -0.140793000 |
| 1 | 5.387701000  | -1.134994000 | 0.023466000  |
| 1 | 4.281675000  | -2.289021000 | 0.794113000  |
| 1 | 4.704997000  | -2.478652000 | -0.931694000 |

[ $\mathbf{1f}_{\text{SB}}$ ] (TE = -2752.915242)

|   |              |              |              |
|---|--------------|--------------|--------------|
| 6 | 1.187863000  | 1.937104000  | 1.629899000  |
| 6 | 0.827798000  | 0.659229000  | 2.369242000  |
| 6 | -2.417257000 | 1.468647000  | 0.802781000  |
| 6 | -1.897914000 | 0.652659000  | 1.976820000  |
| 6 | 0.664628000  | -2.510968000 | 1.529946000  |
| 6 | -0.532361000 | -1.714204000 | 2.010957000  |
| 1 | -1.789243000 | 2.357116000  | 0.615510000  |
| 1 | -1.845619000 | 1.353612000  | 2.838005000  |
| 1 | 0.607158000  | -3.582493000 | 1.787695000  |
| 1 | -0.649527000 | -1.933094000 | 3.097938000  |
| 1 | 1.989383000  | 2.514161000  | 2.124212000  |
| 1 | 1.725109000  | 0.008510000  | 2.400979000  |
| 6 | 1.660254000  | 3.144358000  | -0.949509000 |
| 1 | 2.084810000  | 2.870929000  | -1.933472000 |
| 6 | -3.482652000 | -0.846626000 | -0.489030000 |
| 1 | -3.170997000 | -1.229682000 | 0.499129000  |
| 6 | 2.711664000  | -2.226906000 | -0.426201000 |

|    |              |              |              |
|----|--------------|--------------|--------------|
| 1  | 2.967906000  | -1.426736000 | 0.295208000  |
| 23 | -0.023488000 | -0.103032000 | -0.641836000 |
| 16 | -2.354622000 | 0.605786000  | -0.827854000 |
| 16 | 1.778150000  | 1.509245000  | -0.065773000 |
| 16 | 0.859821000  | -2.389818000 | -0.306722000 |
| 1  | 0.304573000  | 2.594313000  | 1.526380000  |
| 1  | 0.642412000  | 0.943610000  | 3.429330000  |
| 1  | -1.449503000 | -2.131619000 | 1.547233000  |
| 1  | 1.603798000  | -2.115608000 | 1.956519000  |
| 1  | -2.679904000 | -0.078877000 | 2.265464000  |
| 1  | -3.450643000 | 1.835132000  | 0.949882000  |
| 6  | 3.402365000  | -3.524285000 | -0.070125000 |
| 1  | 4.498688000  | -3.410845000 | -0.131479000 |
| 1  | 3.159373000  | -3.856695000 | 0.951569000  |
| 1  | 3.103143000  | -4.325227000 | -0.767644000 |
| 6  | 3.030222000  | -1.757647000 | -1.828550000 |
| 1  | 2.707988000  | -2.500807000 | -2.579327000 |
| 1  | 2.524035000  | -0.799429000 | -2.043777000 |
| 1  | 4.115460000  | -1.604941000 | -1.950439000 |
| 6  | -4.928994000 | -0.405506000 | -0.459984000 |
| 1  | -5.592530000 | -1.262144000 | -0.248990000 |
| 1  | -5.115611000 | 0.354065000  | 0.316378000  |
| 1  | -5.225842000 | 0.022431000  | -1.432856000 |
| 6  | -3.195970000 | -1.892662000 | -1.541793000 |
| 1  | -3.423076000 | -1.513422000 | -2.554537000 |
| 1  | -2.130943000 | -2.185830000 | -1.509746000 |
| 1  | -3.810836000 | -2.792627000 | -1.373936000 |
| 6  | 0.231117000  | 3.601670000  | -1.136275000 |
| 1  | -0.394036000 | 2.790090000  | -1.549055000 |
| 1  | -0.217224000 | 3.921447000  | -0.178959000 |
| 1  | 0.185735000  | 4.466919000  | -1.819248000 |
| 6  | 2.541222000  | 4.189127000  | -0.297136000 |
| 1  | 3.569824000  | 3.822801000  | -0.153713000 |
| 1  | 2.584067000  | 5.099676000  | -0.918987000 |
| 1  | 2.143161000  | 4.488352000  | 0.687295000  |
| 5  | -0.475277000 | -0.114141000 | 1.819800000  |

[1a''<sub>pc</sub>] (TE = -3407.054006)

|   |             |              |             |
|---|-------------|--------------|-------------|
| 6 | 1.102277000 | -0.868547000 | 1.596696000 |
| 6 | 1.782655000 | -0.462513000 | 2.759578000 |
| 1 | 1.409249000 | 0.408940000  | 3.308387000 |
| 6 | 2.907556000 | -1.129665000 | 3.238245000 |
| 1 | 3.405744000 | -0.770988000 | 4.144653000 |
| 6 | 3.383969000 | -2.256135000 | 2.574813000 |
| 1 | 4.262081000 | -2.794703000 | 2.943086000 |
| 6 | 2.732902000 | -2.683151000 | 1.418402000 |

|    |              |              |              |
|----|--------------|--------------|--------------|
| 1  | 3.133209000  | -3.549386000 | 0.880290000  |
| 6  | 1.621102000  | -2.002374000 | 0.905326000  |
| 6  | -0.166521000 | 1.301423000  | 1.607333000  |
| 6  | -0.995405000 | 1.684768000  | 2.678370000  |
| 1  | -1.605632000 | 0.922556000  | 3.174363000  |
| 6  | -1.076836000 | 3.002451000  | 3.120592000  |
| 1  | -1.742899000 | 3.254741000  | 3.951846000  |
| 6  | -0.309417000 | 3.990797000  | 2.511050000  |
| 1  | -0.363398000 | 5.030292000  | 2.847554000  |
| 6  | 0.531153000  | 3.637616000  | 1.457755000  |
| 1  | 1.126665000  | 4.419504000  | 0.977076000  |
| 6  | 0.604796000  | 2.319445000  | 0.991265000  |
| 6  | -1.412216000 | -0.822706000 | 1.427133000  |
| 6  | -1.550807000 | -1.673427000 | 2.535328000  |
| 1  | -0.666918000 | -1.889323000 | 3.146661000  |
| 6  | -2.777181000 | -2.233449000 | 2.885090000  |
| 1  | -2.845325000 | -2.891647000 | 3.757240000  |
| 6  | -3.915368000 | -1.942607000 | 2.137937000  |
| 1  | -4.885958000 | -2.367544000 | 2.410065000  |
| 6  | -3.805824000 | -1.098407000 | 1.033393000  |
| 1  | -4.703278000 | -0.871276000 | 0.450665000  |
| 6  | -2.574045000 | -0.553792000 | 0.654193000  |
| 6  | -0.115662000 | -0.126213000 | 1.119063000  |
| 23 | 0.094395000  | -0.078241000 | -1.098345000 |
| 6  | 2.523848000  | -2.826976000 | -1.767094000 |
| 1  | 3.042257000  | -3.658608000 | -1.255235000 |
| 6  | 1.320047000  | 3.382486000  | -1.648203000 |
| 1  | 0.305700000  | 3.721693000  | -1.354086000 |
| 6  | -3.510927000 | -0.214314000 | -2.203996000 |
| 1  | -3.102444000 | 0.308105000  | -3.093800000 |
| 6  | -4.991349000 | 0.128277000  | -2.127392000 |
| 1  | -5.507736000 | -0.257447000 | -3.024117000 |
| 1  | -5.491719000 | -0.325424000 | -1.256777000 |
| 1  | -5.174615000 | 1.212674000  | -2.092285000 |
| 6  | -3.290196000 | -1.705787000 | -2.418341000 |
| 1  | -3.694355000 | -2.296406000 | -1.577649000 |
| 1  | -3.795181000 | -2.047823000 | -3.337618000 |
| 1  | -2.215258000 | -1.946843000 | -2.501076000 |
| 6  | 2.120482000  | -3.278054000 | -3.164616000 |
| 1  | 1.553779000  | -4.222458000 | -3.170676000 |
| 1  | 1.496128000  | -2.509769000 | -3.658449000 |
| 1  | 3.012700000  | -3.428472000 | -3.796073000 |
| 6  | 3.455927000  | -1.633436000 | -1.847751000 |
| 1  | 3.794818000  | -1.297690000 | -0.853171000 |
| 1  | 4.350109000  | -1.867125000 | -2.451493000 |
| 1  | 2.932449000  | -0.780465000 | -2.318950000 |

|    |              |              |              |
|----|--------------|--------------|--------------|
| 6  | 2.280124000  | 4.555245000  | -1.512494000 |
| 1  | 1.937103000  | 5.396560000  | -2.139790000 |
| 1  | 2.370839000  | 4.934645000  | -0.483317000 |
| 1  | 3.293769000  | 4.296615000  | -1.858775000 |
| 6  | 1.241226000  | 2.913863000  | -3.096858000 |
| 1  | 2.202595000  | 2.495202000  | -3.444416000 |
| 1  | 0.470518000  | 2.130144000  | -3.218503000 |
| 1  | 0.982653000  | 3.749068000  | -3.771090000 |
| 15 | -2.306203000 | 0.403749000  | -0.896887000 |
| 15 | 1.508067000  | 1.861484000  | -0.546343000 |
| 15 | 0.984010000  | -2.358859000 | -0.793851000 |
| 6  | 3.306934000  | 1.698576000  | -0.002970000 |
| 1  | 3.277701000  | 0.676270000  | 0.427863000  |
| 6  | 4.260574000  | 1.678513000  | -1.189420000 |
| 1  | 4.462821000  | 2.693354000  | -1.569112000 |
| 1  | 5.233212000  | 1.248464000  | -0.893733000 |
| 1  | 3.879133000  | 1.076215000  | -2.029553000 |
| 6  | 3.781719000  | 2.644475000  | 1.086342000  |
| 1  | 4.805995000  | 2.374170000  | 1.398864000  |
| 1  | 3.814692000  | 3.692308000  | 0.742021000  |
| 1  | 3.139889000  | 2.600920000  | 1.980304000  |
| 6  | 0.090653000  | -4.017390000 | -0.742512000 |
| 1  | -0.160827000 | -4.175416000 | -1.810812000 |
| 6  | -1.208637000 | -3.923659000 | 0.034727000  |
| 1  | -1.011351000 | -3.832284000 | 1.115864000  |
| 1  | -1.809872000 | -3.049194000 | -0.261417000 |
| 1  | -1.816036000 | -4.832446000 | -0.116456000 |
| 6  | 0.921935000  | -5.187930000 | -0.244289000 |
| 1  | 0.331061000  | -6.119578000 | -0.287226000 |
| 1  | 1.840221000  | -5.358903000 | -0.828759000 |
| 1  | 1.211455000  | -5.039229000 | 0.810774000  |
| 6  | -2.800841000 | 2.170712000  | -0.497564000 |
| 1  | -1.939913000 | 2.476335000  | 0.126576000  |
| 6  | -4.057247000 | 2.377328000  | 0.330518000  |
| 1  | -4.134234000 | 3.434971000  | 0.639653000  |
| 1  | -4.978842000 | 2.131093000  | -0.221628000 |
| 1  | -4.041935000 | 1.768735000  | 1.249129000  |
| 6  | -2.762440000 | 3.018536000  | -1.759655000 |
| 1  | -2.805874000 | 4.092420000  | -1.508650000 |
| 1  | -1.827855000 | 2.846009000  | -2.324660000 |
| 1  | -3.610041000 | 2.808501000  | -2.435418000 |

[1b''<sub>psi</sub>] (TE = -3658.414947)

|   |             |              |             |
|---|-------------|--------------|-------------|
| 6 | 0.897001000 | -1.698350000 | 1.817454000 |
| 6 | 0.691133000 | -2.354540000 | 3.038361000 |
| 1 | 0.000277000 | -1.920140000 | 3.772688000 |

|    |              |              |              |
|----|--------------|--------------|--------------|
| 6  | 1.323018000  | -3.562168000 | 3.333464000  |
| 1  | 1.136533000  | -4.062423000 | 4.289134000  |
| 6  | 2.189793000  | -4.132459000 | 2.403939000  |
| 1  | 2.690074000  | -5.080428000 | 2.624871000  |
| 6  | 2.415262000  | -3.496210000 | 1.183701000  |
| 1  | 3.096954000  | -3.961424000 | 0.463626000  |
| 6  | 1.767913000  | -2.294506000 | 0.875855000  |
| 6  | 0.845258000  | 1.408856000  | 2.001914000  |
| 6  | 1.391195000  | 1.462846000  | 3.290940000  |
| 1  | 1.274990000  | 0.600789000  | 3.960782000  |
| 6  | 2.108384000  | 2.572764000  | 3.735543000  |
| 1  | 2.538436000  | 2.583862000  | 4.742148000  |
| 6  | 2.279219000  | 3.666712000  | 2.890430000  |
| 1  | 2.839978000  | 4.543675000  | 3.228319000  |
| 6  | 1.738019000  | 3.641790000  | 1.605783000  |
| 1  | 1.883233000  | 4.510672000  | 0.956357000  |
| 6  | 1.038349000  | 2.519626000  | 1.146545000  |
| 6  | -1.833562000 | -0.141218000 | 1.829641000  |
| 6  | -2.260671000 | 0.260881000  | 3.102515000  |
| 1  | -1.513527000 | 0.476641000  | 3.877165000  |
| 6  | -3.610943000 | 0.439603000  | 3.398444000  |
| 1  | -3.917012000 | 0.772807000  | 4.395230000  |
| 6  | -4.569253000 | 0.208424000  | 2.413913000  |
| 1  | -5.631420000 | 0.357946000  | 2.630711000  |
| 6  | -4.172893000 | -0.211648000 | 1.145785000  |
| 1  | -4.939366000 | -0.389491000 | 0.385301000  |
| 6  | -2.816759000 | -0.385091000 | 0.840871000  |
| 23 | 0.057017000  | 0.037273000  | -1.184576000 |
| 6  | 3.733492000  | -0.792915000 | -0.623845000 |
| 1  | 4.398984000  | -1.671080000 | -0.517656000 |
| 6  | -1.055223000 | 3.626374000  | -0.524324000 |
| 1  | -0.620309000 | 4.620172000  | -0.301921000 |
| 6  | -2.577548000 | -2.710986000 | -0.942075000 |
| 1  | -2.636651000 | -2.895710000 | -2.035599000 |
| 6  | -3.855822000 | -3.187776000 | -0.271057000 |
| 1  | -3.983329000 | -4.272975000 | -0.430021000 |
| 1  | -3.805166000 | -3.022789000 | 0.818852000  |
| 1  | -4.764791000 | -2.693019000 | -0.641501000 |
| 6  | -1.389701000 | -3.481031000 | -0.387698000 |
| 1  | -1.272502000 | -3.305681000 | 0.698022000  |
| 1  | -1.522023000 | -4.566591000 | -0.535450000 |
| 1  | -0.447744000 | -3.169993000 | -0.864603000 |
| 6  | 4.098830000  | -0.009573000 | -1.873641000 |
| 1  | 4.016006000  | -0.598137000 | -2.802244000 |
| 1  | 3.425464000  | 0.860311000  | -1.972215000 |
| 1  | 5.132472000  | 0.372352000  | -1.812274000 |

|    |              |              |              |
|----|--------------|--------------|--------------|
| 6  | 3.878656000  | 0.090453000  | 0.604530000  |
| 1  | 3.666200000  | -0.446858000 | 1.542775000  |
| 1  | 4.904457000  | 0.492288000  | 0.667756000  |
| 1  | 3.185462000  | 0.950261000  | 0.551504000  |
| 6  | -1.765282000 | 3.657123000  | -1.867878000 |
| 1  | -2.638273000 | 4.331642000  | -1.838267000 |
| 1  | -1.118959000 | 3.987816000  | -2.697226000 |
| 1  | -2.131983000 | 2.643868000  | -2.115998000 |
| 6  | -2.032495000 | 3.251873000  | 0.577657000  |
| 1  | -2.439451000 | 2.237653000  | 0.409871000  |
| 1  | -1.568083000 | 3.258183000  | 1.576926000  |
| 1  | -2.882401000 | 3.955509000  | 0.593535000  |
| 14 | -0.012912000 | -0.121557000 | 1.230395000  |
| 15 | 0.373265000  | 2.401132000  | -0.586520000 |
| 15 | -2.221556000 | -0.856309000 | -0.854086000 |
| 15 | 1.975267000  | -1.453945000 | -0.772190000 |
| 6  | 2.134688000  | -2.882503000 | -2.012189000 |
| 1  | 1.500065000  | -3.667248000 | -1.556595000 |
| 6  | 3.513796000  | -3.469531000 | -2.269221000 |
| 1  | 3.438217000  | -4.328726000 | -2.958318000 |
| 1  | 4.189411000  | -2.738784000 | -2.744436000 |
| 1  | 4.011722000  | -3.830980000 | -1.355885000 |
| 6  | 1.476070000  | -2.447887000 | -3.316941000 |
| 1  | 0.444863000  | -2.083674000 | -3.139214000 |
| 1  | 2.040696000  | -1.631301000 | -3.803898000 |
| 1  | 1.419702000  | -3.282604000 | -4.037253000 |
| 6  | -3.426060000 | -0.082762000 | -2.089414000 |
| 1  | -3.598747000 | 0.921896000  | -1.650918000 |
| 6  | -2.646345000 | 0.088615000  | -3.389884000 |
| 1  | -2.397777000 | -0.891392000 | -3.838153000 |
| 1  | -3.228691000 | 0.654508000  | -4.137937000 |
| 1  | -1.697199000 | 0.636491000  | -3.224052000 |
| 6  | -4.768648000 | -0.734863000 | -2.381446000 |
| 1  | -4.644948000 | -1.748182000 | -2.800938000 |
| 1  | -5.423630000 | -0.812459000 | -1.500654000 |
| 1  | -5.316346000 | -0.144066000 | -3.136397000 |
| 6  | 1.654794000  | 3.265308000  | -1.680822000 |
| 1  | 2.608776000  | 2.952858000  | -1.208026000 |
| 6  | 1.630818000  | 4.782201000  | -1.789951000 |
| 1  | 2.468644000  | 5.130671000  | -2.418879000 |
| 1  | 0.704333000  | 5.141310000  | -2.268943000 |
| 1  | 1.720377000  | 5.296736000  | -0.821345000 |
| 6  | 1.586152000  | 2.633985000  | -3.068062000 |
| 1  | 1.594377000  | 1.527743000  | -3.004016000 |
| 1  | 0.666492000  | 2.930704000  | -3.603616000 |
| 1  | 2.444045000  | 2.939648000  | -3.692500000 |

[1c''<sub>PB</sub>] (TE = -3393.825304)

|    |              |              |              |
|----|--------------|--------------|--------------|
| 6  | 1.120257000  | -1.136340000 | 1.738734000  |
| 6  | 0.969903000  | -1.836762000 | 2.950438000  |
| 1  | 0.086376000  | -1.635856000 | 3.568740000  |
| 6  | 1.892479000  | -2.782264000 | 3.391569000  |
| 1  | 1.729973000  | -3.304907000 | 4.339656000  |
| 6  | 3.017814000  | -3.060954000 | 2.620846000  |
| 1  | 3.752324000  | -3.801661000 | 2.951282000  |
| 6  | 3.194930000  | -2.390308000 | 1.413078000  |
| 1  | 4.075645000  | -2.624842000 | 0.805532000  |
| 6  | 2.261514000  | -1.448264000 | 0.961150000  |
| 6  | 0.357796000  | 1.489569000  | 1.723081000  |
| 6  | 1.008605000  | 1.738279000  | 2.945778000  |
| 1  | 1.340651000  | 0.882526000  | 3.547156000  |
| 6  | 1.247462000  | 3.025170000  | 3.421381000  |
| 1  | 1.763321000  | 3.169180000  | 4.376171000  |
| 6  | 0.816228000  | 4.124797000  | 2.684487000  |
| 1  | 0.979809000  | 5.142642000  | 3.051199000  |
| 6  | 0.179874000  | 3.915082000  | 1.463328000  |
| 1  | -0.149473000 | 4.783463000  | 0.884566000  |
| 6  | -0.026111000 | 2.623140000  | 0.961484000  |
| 6  | -1.509050000 | -0.460748000 | 1.705270000  |
| 6  | -2.059600000 | -0.045164000 | 2.931565000  |
| 1  | -1.445795000 | 0.567157000  | 3.604409000  |
| 6  | -3.362094000 | -0.357758000 | 3.311461000  |
| 1  | -3.751206000 | -0.005595000 | 4.272226000  |
| 6  | -4.171727000 | -1.106132000 | 2.460201000  |
| 1  | -5.201379000 | -1.348836000 | 2.739522000  |
| 6  | -3.657455000 | -1.537918000 | 1.240990000  |
| 1  | -4.302100000 | -2.114779000 | 0.570492000  |
| 6  | -2.345242000 | -1.226680000 | 0.857872000  |
| 23 | 0.096921000  | 0.026876000  | -1.114592000 |
| 6  | 3.984952000  | 0.342367000  | -0.540838000 |
| 1  | 4.795158000  | -0.354935000 | -0.251924000 |
| 6  | -2.450494000 | 2.952660000  | -0.673313000 |
| 1  | -2.406802000 | 4.031026000  | -0.426475000 |
| 6  | -1.478680000 | -3.518200000 | -0.819011000 |
| 1  | -1.465948000 | -3.759703000 | -1.903020000 |
| 6  | -2.556445000 | -4.334255000 | -0.123030000 |
| 1  | -2.328054000 | -5.410615000 | -0.213392000 |
| 1  | -2.583519000 | -4.098109000 | 0.954453000  |
| 1  | -3.566582000 | -4.179086000 | -0.527330000 |
| 6  | -0.120517000 | -3.859296000 | -0.228341000 |
| 1  | -0.086482000 | -3.614774000 | 0.849287000  |
| 1  | 0.097898000  | -4.935496000 | -0.334879000 |



|    |              |              |              |
|----|--------------|--------------|--------------|
| 1  | 0.683408000  | -3.283475000 | -0.709135000 |
| 6  | 4.354584000  | 1.015964000  | -1.853901000 |
| 1  | 4.551818000  | 0.301145000  | -2.667641000 |
| 1  | 3.552590000  | 1.688716000  | -2.198831000 |
| 1  | 5.263128000  | 1.630276000  | -1.730003000 |
| 6  | 3.799938000  | 1.362462000  | 0.572458000  |
| 1  | 3.653044000  | 0.882093000  | 1.553022000  |
| 1  | 4.683512000  | 2.019658000  | 0.644670000  |
| 1  | 2.916765000  | 2.002651000  | 0.392729000  |
| 6  | -3.104044000 | 2.762717000  | -2.033545000 |
| 1  | -4.150281000 | 3.113356000  | -2.020459000 |
| 1  | -2.585428000 | 3.297664000  | -2.846247000 |
| 1  | -3.117835000 | 1.690584000  | -2.301208000 |
| 6  | -3.237288000 | 2.238382000  | 0.409011000  |
| 1  | -3.254890000 | 1.149187000  | 0.230383000  |
| 1  | -2.807671000 | 2.394201000  | 1.411474000  |
| 1  | -4.281323000 | 2.595529000  | 0.425144000  |
| 5  | 0.008030000  | -0.037718000 | 1.382567000  |
| 15 | 2.426682000  | -0.692846000 | -0.717592000 |
| 15 | -0.672799000 | 2.356223000  | -0.747413000 |
| 15 | -1.691415000 | -1.645940000 | -0.809387000 |
| 6  | 0.111898000  | 3.684158000  | -1.850377000 |
| 1  | -0.089172000 | 3.251633000  | -2.852061000 |
| 6  | 1.616824000  | 3.682955000  | -1.651131000 |
| 1  | 2.130703000  | 4.205578000  | -2.475833000 |
| 1  | 1.900949000  | 4.180435000  | -0.707761000 |
| 1  | 1.993985000  | 2.648958000  | -1.600965000 |
| 6  | -0.447093000 | 5.099100000  | -1.847631000 |
| 1  | 0.067214000  | 5.697602000  | -2.619888000 |
| 1  | -1.523920000 | 5.144975000  | -2.071422000 |
| 1  | -0.280435000 | 5.617500000  | -0.889502000 |
| 6  | 2.955110000  | -2.143953000 | -1.819182000 |
| 1  | 2.502494000  | -3.005475000 | -1.294650000 |
| 6  | 4.437563000  | -2.439615000 | -1.990366000 |
| 1  | 4.567847000  | -3.374379000 | -2.562928000 |
| 1  | 4.961013000  | -1.649487000 | -2.552344000 |
| 1  | 4.968698000  | -2.572184000 | -1.035026000 |
| 6  | 2.259441000  | -2.004738000 | -3.167767000 |
| 1  | 2.429072000  | -2.893246000 | -3.800648000 |
| 1  | 1.165929000  | -1.887824000 | -3.035284000 |
| 1  | 2.625979000  | -1.125749000 | -3.728512000 |
| 6  | -3.078189000 | -1.298819000 | -2.041555000 |
| 1  | -3.547005000 | -0.388454000 | -1.616337000 |
| 6  | -2.403210000 | -0.920474000 | -3.355906000 |
| 1  | -1.853884000 | -1.778334000 | -3.786360000 |
| 1  | -3.141145000 | -0.590476000 | -4.108083000 |

|   |              |              |              |
|---|--------------|--------------|--------------|
| 1 | -1.682300000 | -0.092054000 | -3.210073000 |
| 6 | -4.160418000 | -2.336665000 | -2.290049000 |
| 1 | -3.740799000 | -3.276543000 | -2.688468000 |
| 1 | -4.746567000 | -2.579570000 | -1.390909000 |
| 1 | -4.872765000 | -1.961390000 | -3.045282000 |

[1d''<sub>sc</sub>] (TE = -3222.697317)

|    |              |              |              |
|----|--------------|--------------|--------------|
| 6  | 0.055657000  | -1.552241000 | 0.993890000  |
| 6  | -0.571792000 | -2.070630000 | 2.142120000  |
| 1  | -1.143395000 | -1.385342000 | 2.777659000  |
| 6  | -0.485090000 | -3.413114000 | 2.502130000  |
| 1  | -0.989241000 | -3.763980000 | 3.408079000  |
| 6  | 0.243866000  | -4.304472000 | 1.718134000  |
| 1  | 0.318930000  | -5.360487000 | 1.992702000  |
| 6  | 0.847537000  | -3.837049000 | 0.554137000  |
| 1  | 1.374570000  | -4.528991000 | -0.111905000 |
| 6  | 0.747831000  | -2.491223000 | 0.191887000  |
| 6  | 1.199659000  | 0.661308000  | 1.205142000  |
| 6  | 1.797298000  | 0.298446000  | 2.426650000  |
| 1  | 1.401895000  | -0.572304000 | 2.961188000  |
| 6  | 2.861976000  | 1.002647000  | 2.982275000  |
| 1  | 3.286278000  | 0.677064000  | 3.937224000  |
| 6  | 3.380808000  | 2.119041000  | 2.330587000  |
| 1  | 4.215897000  | 2.680864000  | 2.758560000  |
| 6  | 2.842413000  | 2.488407000  | 1.101573000  |
| 1  | 3.271332000  | 3.324717000  | 0.538823000  |
| 6  | 1.781871000  | 1.769811000  | 0.541872000  |
| 6  | -1.294389000 | 0.559999000  | 1.073686000  |
| 6  | -1.425438000 | 1.196369000  | 2.322505000  |
| 1  | -0.555059000 | 1.219592000  | 2.986992000  |
| 6  | -2.606421000 | 1.800872000  | 2.742728000  |
| 1  | -2.649587000 | 2.280446000  | 3.725622000  |
| 6  | -3.723825000 | 1.800181000  | 1.912864000  |
| 1  | -4.654750000 | 2.283473000  | 2.222604000  |
| 6  | -3.628734000 | 1.201766000  | 0.660210000  |
| 1  | -4.474761000 | 1.246461000  | -0.032078000 |
| 6  | -2.443458000 | 0.584047000  | 0.243334000  |
| 16 | -2.357883000 | 0.098240000  | -1.492234000 |
| 16 | 1.293599000  | -2.040904000 | -1.460220000 |
| 16 | 1.363377000  | 2.141742000  | -1.167003000 |
| 23 | 0.099548000  | 0.094390000  | -1.511764000 |
| 6  | 3.170347000  | -1.997055000 | -1.359816000 |
| 1  | 3.465138000  | -3.060350000 | -1.291152000 |
| 6  | 0.406019000  | 3.761530000  | -1.084037000 |
| 1  | 1.167538000  | 4.516649000  | -0.815729000 |
| 6  | -3.258749000 | -1.554869000 | -1.608936000 |

|   |              |              |              |
|---|--------------|--------------|--------------|
| 1 | -3.250749000 | -1.674398000 | -2.709178000 |
| 6 | -4.684735000 | -1.441305000 | -1.121350000 |
| 1 | -5.227671000 | -2.379816000 | -1.326826000 |
| 1 | -4.717444000 | -1.276653000 | -0.030841000 |
| 1 | -5.228175000 | -0.619431000 | -1.613888000 |
| 6 | -2.500763000 | -2.686810000 | -0.965260000 |
| 1 | -2.442449000 | -2.556235000 | 0.129294000  |
| 1 | -3.007045000 | -3.647252000 | -1.164056000 |
| 1 | -1.472075000 | -2.750411000 | -1.353231000 |
| 6 | 3.614552000  | -1.405542000 | -2.679714000 |
| 1 | 3.253404000  | -1.989931000 | -3.541599000 |
| 1 | 3.223504000  | -0.374540000 | -2.771482000 |
| 1 | 4.714528000  | -1.358435000 | -2.733859000 |
| 6 | 3.689353000  | -1.221171000 | -0.177618000 |
| 1 | 3.328531000  | -1.626151000 | 0.780949000  |
| 1 | 4.792591000  | -1.249330000 | -0.165981000 |
| 1 | 3.374112000  | -0.165644000 | -0.241495000 |
| 6 | -0.095357000 | 3.983741000  | -2.493898000 |
| 1 | -0.660924000 | 4.927469000  | -2.561839000 |
| 1 | 0.725426000  | 4.020964000  | -3.228488000 |
| 1 | -0.775487000 | 3.157514000  | -2.776292000 |
| 6 | -0.710840000 | 3.738040000  | -0.074479000 |
| 1 | -1.441458000 | 2.951563000  | -0.332236000 |
| 1 | -0.349409000 | 3.543824000  | 0.947630000  |
| 1 | -1.237455000 | 4.708024000  | -0.071434000 |
| 6 | 0.005131000  | -0.083249000 | 0.650742000  |

[1e''<sub>ssi</sub>] (TE = -3474.046310)

|   |             |              |              |
|---|-------------|--------------|--------------|
| 6 | 0.873813000 | -1.702548000 | 1.272089000  |
| 6 | 0.855323000 | -2.230700000 | 2.571260000  |
| 1 | 0.327612000 | -1.685344000 | 3.364007000  |
| 6 | 1.483090000 | -3.434538000 | 2.887482000  |
| 1 | 1.450976000 | -3.817559000 | 3.912273000  |
| 6 | 2.144311000 | -4.154916000 | 1.894110000  |
| 1 | 2.633320000 | -5.104522000 | 2.131296000  |
| 6 | 2.160588000 | -3.672911000 | 0.587338000  |
| 1 | 2.648178000 | -4.247204000 | -0.208024000 |
| 6 | 1.536951000 | -2.459326000 | 0.286204000  |
| 6 | 1.011936000 | 1.405084000  | 1.426031000  |
| 6 | 1.412550000 | 1.557882000  | 2.761573000  |
| 1 | 1.157784000 | 0.777614000  | 3.490002000  |
| 6 | 2.133992000 | 2.669306000  | 3.194755000  |
| 1 | 2.429431000 | 2.756326000  | 4.245048000  |
| 6 | 2.487203000 | 3.664963000  | 2.285791000  |
| 1 | 3.060728000 | 4.536908000  | 2.614317000  |
| 6 | 2.126938000 | 3.534765000  | 0.946634000  |

|    |              |              |              |
|----|--------------|--------------|--------------|
| 1  | 2.426948000  | 4.294841000  | 0.216953000  |
| 6  | 1.394713000  | 2.420611000  | 0.527731000  |
| 6  | -1.759913000 | 0.027235000  | 1.300189000  |
| 6  | -2.163452000 | 0.313559000  | 2.612233000  |
| 1  | -1.404284000 | 0.384513000  | 3.401361000  |
| 6  | -3.499010000 | 0.536783000  | 2.944552000  |
| 1  | -3.777078000 | 0.762255000  | 3.978865000  |
| 6  | -4.475270000 | 0.495971000  | 1.952086000  |
| 1  | -5.523319000 | 0.693189000  | 2.196545000  |
| 6  | -4.109316000 | 0.224968000  | 0.635137000  |
| 1  | -4.864280000 | 0.228999000  | -0.157275000 |
| 6  | -2.770277000 | -0.024159000 | 0.317040000  |
| 16 | -2.391997000 | -0.312348000 | -1.444776000 |
| 16 | 1.566064000  | -1.935533000 | -1.457418000 |
| 16 | 1.012878000  | 2.319175000  | -1.249822000 |
| 23 | 0.075627000  | 0.060277000  | -1.706460000 |
| 6  | 3.356816000  | -1.406091000 | -1.635131000 |
| 1  | 3.943051000  | -2.336322000 | -1.523052000 |
| 6  | -0.324037000 | 3.632101000  | -1.384972000 |
| 1  | 0.188460000  | 4.584400000  | -1.157006000 |
| 6  | -2.844778000 | -2.127918000 | -1.634164000 |
| 1  | -2.528881000 | -2.282255000 | -2.683477000 |
| 6  | -4.335443000 | -2.352145000 | -1.510853000 |
| 1  | -4.583880000 | -3.391619000 | -1.786009000 |
| 1  | -4.672823000 | -2.201005000 | -0.471479000 |
| 1  | -4.910435000 | -1.677232000 | -2.164253000 |
| 6  | -2.039380000 | -3.021482000 | -0.722715000 |
| 1  | -2.259538000 | -2.813823000 | 0.339182000  |
| 1  | -2.282082000 | -4.080390000 | -0.915093000 |
| 1  | -0.959050000 | -2.880836000 | -0.878922000 |
| 6  | 3.478544000  | -0.865608000 | -3.043073000 |
| 1  | 3.201187000  | -1.613441000 | -3.803488000 |
| 1  | 2.813754000  | 0.013486000  | -3.156642000 |
| 1  | 4.510556000  | -0.534525000 | -3.244349000 |
| 6  | 3.760235000  | -0.387235000 | -0.598100000 |
| 1  | 3.638960000  | -0.761168000 | 0.431063000  |
| 1  | 4.817425000  | -0.103755000 | -0.737019000 |
| 1  | 3.142857000  | 0.521420000  | -0.705355000 |
| 6  | -0.773737000 | 3.600258000  | -2.828834000 |
| 1  | -1.562186000 | 4.349573000  | -3.007901000 |
| 1  | 0.054672000  | 3.795698000  | -3.528801000 |
| 1  | -1.197090000 | 2.602514000  | -3.058427000 |
| 6  | -1.465345000 | 3.391354000  | -0.428121000 |
| 1  | -1.939668000 | 2.418874000  | -0.646710000 |
| 1  | -1.140496000 | 3.380389000  | 0.624757000  |
| 1  | -2.228736000 | 4.179834000  | -0.542236000 |

14 0.051080000 -0.077748000 0.672361000

[ $\mathbf{1f''}_{SB}$ ] (TE = -3209.473694)

|    |              |              |              |
|----|--------------|--------------|--------------|
| 6  | 0.352700000  | -1.658846000 | 1.073807000  |
| 6  | -0.042029000 | -2.245178000 | 2.290949000  |
| 1  | -0.595852000 | -1.632254000 | 3.013348000  |
| 6  | 0.228831000  | -3.573911000 | 2.609101000  |
| 1  | -0.100708000 | -3.982937000 | 3.569375000  |
| 6  | 0.910355000  | -4.383026000 | 1.702109000  |
| 1  | 1.123046000  | -5.429938000 | 1.937488000  |
| 6  | 1.292704000  | -3.849907000 | 0.474811000  |
| 1  | 1.789389000  | -4.478778000 | -0.272169000 |
| 6  | 1.016904000  | -2.513230000 | 0.171829000  |
| 6  | 1.204911000  | 0.911389000  | 1.261929000  |
| 6  | 1.808842000  | 0.738637000  | 2.521889000  |
| 1  | 1.494669000  | -0.111035000 | 3.141082000  |
| 6  | 2.797870000  | 1.589977000  | 3.008948000  |
| 1  | 3.234987000  | 1.408940000  | 3.995964000  |
| 6  | 3.234887000  | 2.664427000  | 2.237162000  |
| 1  | 4.015309000  | 3.336828000  | 2.605169000  |
| 6  | 2.684982000  | 2.854680000  | 0.973343000  |
| 1  | 3.043362000  | 3.665526000  | 0.329767000  |
| 6  | 1.690842000  | 1.992927000  | 0.498946000  |
| 6  | -1.453049000 | 0.383731000  | 1.166279000  |
| 6  | -1.697610000 | 0.900615000  | 2.452855000  |
| 1  | -0.863050000 | 0.951148000  | 3.163226000  |
| 6  | -2.942769000 | 1.378058000  | 2.853459000  |
| 1  | -3.076007000 | 1.773085000  | 3.865468000  |
| 6  | -4.009218000 | 1.371920000  | 1.957902000  |
| 1  | -4.988022000 | 1.763661000  | 2.249488000  |
| 6  | -3.806714000 | 0.885874000  | 0.670036000  |
| 1  | -4.618334000 | 0.920122000  | -0.063253000 |
| 6  | -2.556137000 | 0.386278000  | 0.285985000  |
| 16 | -2.377328000 | -0.054991000 | -1.458352000 |
| 16 | 1.390311000  | -1.971166000 | -1.506283000 |
| 16 | 1.182755000  | 2.228484000  | -1.214386000 |
| 23 | 0.072228000  | 0.092462000  | -1.591640000 |
| 6  | 3.253871000  | -1.727565000 | -1.469336000 |
| 1  | 3.660027000  | -2.754938000 | -1.426189000 |
| 6  | 0.051854000  | 3.729813000  | -1.118067000 |
| 1  | 0.739743000  | 4.575894000  | -0.935721000 |
| 6  | -3.117450000 | -1.782821000 | -1.558582000 |
| 1  | -2.928996000 | -1.996835000 | -2.627705000 |
| 6  | -4.606762000 | -1.754927000 | -1.297554000 |

|   |              |              |              |
|---|--------------|--------------|--------------|
| 1 | -5.044551000 | -2.744996000 | -1.511674000 |
| 1 | -4.817593000 | -1.527644000 | -0.238733000 |
| 1 | -5.123547000 | -1.009817000 | -1.922856000 |
| 6 | -2.386232000 | -2.780410000 | -0.696526000 |
| 1 | -2.472364000 | -2.520064000 | 0.373246000  |
| 1 | -2.812327000 | -3.788860000 | -0.834579000 |
| 1 | -1.315613000 | -2.818045000 | -0.947775000 |
| 6 | 3.597446000  | -1.074345000 | -2.789572000 |
| 1 | 3.274015000  | -1.679991000 | -3.651759000 |
| 1 | 3.102309000  | -0.086629000 | -2.852269000 |
| 1 | 4.684961000  | -0.913902000 | -2.871585000 |
| 6 | 3.721032000  | -0.918509000 | -0.286468000 |
| 1 | 3.430424000  | -1.372875000 | 0.673901000  |
| 1 | 4.820766000  | -0.829545000 | -0.304481000 |
| 1 | 3.293415000  | 0.098029000  | -0.322881000 |
| 6 | -0.577731000 | 3.840361000  | -2.488746000 |
| 1 | -1.245057000 | 4.716257000  | -2.540518000 |
| 1 | 0.175581000  | 3.935158000  | -3.287810000 |
| 1 | -1.185034000 | 2.936947000  | -2.689113000 |
| 6 | -0.974120000 | 3.626845000  | -0.018997000 |
| 1 | -1.638949000 | 2.763603000  | -0.194001000 |
| 1 | -0.514872000 | 3.503429000  | 0.974570000  |
| 1 | -1.594503000 | 4.539269000  | 0.001585000  |
| 5 | 0.038211000  | -0.105960000 | 0.829696000  |

Cartesian coordinates of  $[\mathbf{1a}'_{PC}]^-$ - $[\mathbf{1f}'_{SB}]^-$  and  $[\mathbf{1a}''_{PC}]^-$ - $[\mathbf{1f}''_{SB}]^-$ , along with their total energies (in hartree) including zero point vibrational correction at M06-D3(heptane)/def2-SVP level of theory.

$[\mathbf{1a}'_{PC}]^-$  (TE = -2950.495590)

|    |              |              |              |
|----|--------------|--------------|--------------|
| 23 | 0.007550000  | -0.001928000 | -0.385515000 |
| 15 | -1.811775000 | 1.570141000  | -0.259353000 |
| 15 | 2.352746000  | 0.487580000  | -0.081360000 |
| 15 | -0.553748000 | -2.344467000 | -0.163406000 |
| 6  | -0.015457000 | 0.030544000  | 1.888922000  |
| 6  | -0.861909000 | 1.225808000  | 2.350456000  |
| 6  | 1.402346000  | 0.164659000  | 2.479921000  |
| 6  | -0.682011000 | -1.251491000 | 2.401385000  |
| 6  | 2.559120000  | -0.304404000 | 1.591553000  |
| 6  | -0.303850000 | -2.547875000 | 1.684016000  |
| 6  | -2.167760000 | 1.459546000  | 1.580788000  |
| 1  | -0.250649000 | 2.145239000  | 2.258459000  |
| 1  | -1.120403000 | 1.162083000  | 3.442660000  |
| 1  | -2.718545000 | 2.339372000  | 1.973478000  |
| 1  | -2.845353000 | 0.595323000  | 1.714686000  |
| 1  | -1.780136000 | -1.136884000 | 2.332907000  |

|   |              |              |              |
|---|--------------|--------------|--------------|
| 1 | -0.485010000 | -1.393655000 | 3.497487000  |
| 1 | 0.776120000  | -2.750571000 | 1.822152000  |
| 1 | -0.840163000 | -3.425138000 | 2.101552000  |
| 1 | 1.595773000  | 1.233115000  | 2.714669000  |
| 1 | 1.489342000  | -0.351870000 | 3.469483000  |
| 1 | 3.545040000  | -0.125016000 | 2.067937000  |
| 1 | 2.488431000  | -1.390940000 | 1.391013000  |
| 6 | 3.765565000  | -0.275215000 | -1.072361000 |
| 1 | 3.569941000  | -1.346585000 | -0.875331000 |
| 6 | 2.834089000  | 2.283642000  | 0.271071000  |
| 1 | 1.947557000  | 2.575095000  | 0.868156000  |
| 6 | -1.733123000 | 3.440524000  | -0.573115000 |
| 1 | -1.511750000 | 3.483658000  | -1.659023000 |
| 6 | -3.429986000 | 1.067523000  | -1.109448000 |
| 1 | -3.276074000 | -0.028226000 | -1.154852000 |
| 6 | -2.327438000 | -2.987696000 | -0.453862000 |
| 1 | -2.484404000 | -2.662364000 | -1.503606000 |
| 6 | 0.446728000  | -3.785126000 | -0.893299000 |
| 1 | -0.140974000 | -4.071769000 | -1.788955000 |
| 6 | 1.793640000  | -3.267189000 | -1.360980000 |
| 1 | 2.419128000  | -2.996771000 | -0.488925000 |
| 1 | 2.345415000  | -4.030317000 | -1.940663000 |
| 1 | 1.674627000  | -2.354375000 | -1.973045000 |
| 6 | 0.643612000  | -5.003097000 | -0.001792000 |
| 1 | -0.294906000 | -5.423631000 | 0.387610000  |
| 1 | 1.166955000  | -5.808688000 | -0.549866000 |
| 1 | 1.275069000  | -4.750837000 | 0.867892000  |
| 6 | -3.309750000 | -2.231352000 | 0.426028000  |
| 1 | -4.339728000 | -2.290403000 | 0.028465000  |
| 1 | -3.327562000 | -2.649036000 | 1.449163000  |
| 1 | -3.024994000 | -1.170980000 | 0.503886000  |
| 6 | -2.605132000 | -4.479148000 | -0.364283000 |
| 1 | -3.667104000 | -4.682557000 | -0.598019000 |
| 1 | -2.001371000 | -5.078975000 | -1.063485000 |
| 1 | -2.429138000 | -4.863033000 | 0.657326000  |
| 6 | -4.745314000 | 1.331002000  | -0.393769000 |
| 1 | -4.973933000 | 2.405738000  | -0.303841000 |
| 1 | -5.583732000 | 0.866883000  | -0.946597000 |
| 1 | -4.755942000 | 0.906495000  | 0.623779000  |
| 6 | -3.435284000 | 1.545290000  | -2.552940000 |
| 1 | -4.242046000 | 1.053319000  | -3.125961000 |
| 1 | -3.591745000 | 2.635510000  | -2.638632000 |
| 1 | -2.472283000 | 1.295368000  | -3.039319000 |
| 6 | -0.530521000 | 4.004445000  | 0.163246000  |
| 1 | -0.251338000 | 5.003778000  | -0.216801000 |
| 1 | -0.737149000 | 4.107806000  | 1.244372000  |

|   |              |              |              |
|---|--------------|--------------|--------------|
| 1 | 0.330904000  | 3.327117000  | 0.052468000  |
| 6 | -2.974318000 | 4.267697000  | -0.282005000 |
| 1 | -2.763440000 | 5.345418000  | -0.415119000 |
| 1 | -3.820967000 | 4.021211000  | -0.941613000 |
| 1 | -3.312897000 | 4.136435000  | 0.762026000  |
| 6 | 5.195877000  | 0.022509000  | -0.655158000 |
| 1 | 5.901382000  | -0.648177000 | -1.180106000 |
| 1 | 5.486616000  | 1.054177000  | -0.919157000 |
| 1 | 5.361701000  | -0.108377000 | 0.427512000  |
| 6 | 3.554904000  | -0.044330000 | -2.561480000 |
| 1 | 3.806427000  | 0.992909000  | -2.847955000 |
| 1 | 4.189278000  | -0.717810000 | -3.167062000 |
| 1 | 2.493724000  | -0.208005000 | -2.834185000 |
| 6 | 4.061020000  | 2.593104000  | 1.114599000  |
| 1 | 5.002936000  | 2.408002000  | 0.574063000  |
| 1 | 4.062874000  | 3.660718000  | 1.403490000  |
| 1 | 4.089673000  | 2.006670000  | 2.047885000  |
| 6 | 2.805829000  | 3.095364000  | -1.014698000 |
| 1 | 2.772137000  | 4.180689000  | -0.805186000 |
| 1 | 3.704887000  | 2.908093000  | -1.630121000 |
| 1 | 1.920527000  | 2.831887000  | -1.625324000 |

[1b'<sub>psi</sub>]' (TE = -3201.883971)

|    |              |              |              |
|----|--------------|--------------|--------------|
| 6  | -0.304680000 | 2.718874000  | 1.704127000  |
| 6  | 0.252765000  | 1.699654000  | 2.697639000  |
| 6  | -2.749569000 | -0.547771000 | 1.769441000  |
| 6  | -1.582193000 | -0.869765000 | 2.702794000  |
| 6  | 2.652446000  | -1.171348000 | 1.581533000  |
| 6  | 1.542749000  | -1.158115000 | 2.636976000  |
| 1  | -2.994405000 | 0.532504000  | 1.833019000  |
| 1  | -1.828409000 | -0.566814000 | 3.740647000  |
| 1  | 3.435939000  | -1.930630000 | 1.785357000  |
| 1  | 1.954640000  | -0.819594000 | 3.608732000  |
| 1  | -0.080973000 | 3.767399000  | 1.982199000  |
| 1  | 1.341241000  | 1.871392000  | 2.834517000  |
| 6  | -0.599281000 | 3.760351000  | -1.025111000 |
| 1  | 0.117864000  | 3.940046000  | -1.850628000 |
| 6  | -2.663416000 | -2.661052000 | -0.232743000 |
| 1  | -2.038953000 | -3.053594000 | 0.597035000  |
| 6  | 3.560093000  | -0.701294000 | -1.129250000 |
| 1  | 3.422928000  | 0.387126000  | -0.973980000 |
| 23 | -0.041520000 | -0.046441000 | -0.483526000 |
| 1  | -1.410704000 | 2.637345000  | 1.660879000  |
| 1  | -0.205465000 | 1.846021000  | 3.696604000  |
| 1  | 1.167219000  | -2.185537000 | 2.805359000  |
| 1  | 3.172720000  | -0.190952000 | 1.590088000  |



|   |              |              |              |
|---|--------------|--------------|--------------|
| 1 | -1.425459000 | -1.968171000 | 2.734583000  |
| 1 | -3.679031000 | -1.090102000 | 2.038282000  |
| 6 | 4.954506000  | -1.053896000 | -0.631699000 |
| 1 | 5.711612000  | -0.464785000 | -1.182346000 |
| 1 | 5.090124000  | -0.832171000 | 0.439039000  |
| 1 | 5.205463000  | -2.115311000 | -0.785350000 |
| 6 | 3.397966000  | -0.961787000 | -2.617550000 |
| 1 | 3.578390000  | -2.023405000 | -2.869559000 |
| 1 | 2.369108000  | -0.707657000 | -2.942244000 |
| 1 | 4.109654000  | -0.358208000 | -3.210741000 |
| 6 | -4.083183000 | -3.161958000 | -0.026188000 |
| 1 | -4.101613000 | -4.266466000 | 0.026912000  |
| 1 | -4.543404000 | -2.782961000 | 0.901553000  |
| 1 | -4.736722000 | -2.875388000 | -0.868651000 |
| 6 | -2.078140000 | -3.180134000 | -1.537229000 |
| 1 | -2.700582000 | -2.881005000 | -2.400006000 |
| 1 | -1.070357000 | -2.754242000 | -1.709617000 |
| 1 | -2.011811000 | -4.284415000 | -1.539849000 |
| 6 | -1.894828000 | 3.259388000  | -1.641522000 |
| 1 | -1.738175000 | 2.295074000  | -2.161320000 |
| 1 | -2.660437000 | 3.094244000  | -0.858916000 |
| 1 | -2.312564000 | 3.991498000  | -2.356877000 |
| 6 | -0.840533000 | 5.066418000  | -0.282435000 |
| 1 | 0.066195000  | 5.478873000  | 0.186796000  |
| 1 | -1.237024000 | 5.836987000  | -0.969533000 |
| 1 | -1.593542000 | 4.935964000  | 0.514567000  |
| 6 | 1.992253000  | -3.182266000 | -0.500245000 |
| 1 | 1.617572000  | -3.226757000 | -1.543853000 |
| 6 | 0.930233000  | -3.794630000 | 0.399975000  |
| 1 | 1.302542000  | -3.898082000 | 1.435775000  |
| 1 | 0.035669000  | -3.148872000 | 0.427833000  |
| 1 | 0.635108000  | -4.801175000 | 0.051662000  |
| 6 | 3.290363000  | -3.965740000 | -0.403974000 |
| 1 | 3.094388000  | -5.050756000 | -0.493706000 |
| 1 | 4.008070000  | -3.702212000 | -1.196466000 |
| 1 | 3.790346000  | -3.811377000 | 0.569743000  |
| 6 | -3.756582000 | 0.126926000  | -0.847011000 |
| 1 | -3.399632000 | 1.153139000  | -0.625247000 |
| 6 | -5.164424000 | -0.010010000 | -0.287916000 |
| 1 | -5.614344000 | -0.986683000 | -0.529048000 |
| 1 | -5.203288000 | 0.114676000  | 0.806357000  |
| 1 | -5.824746000 | 0.761238000  | -0.726572000 |
| 6 | -3.728177000 | -0.041976000 | -2.356675000 |
| 1 | -4.131865000 | -1.025815000 | -2.661035000 |
| 1 | -4.336699000 | 0.732181000  | -2.859987000 |
| 1 | -2.688291000 | 0.026363000  | -2.733433000 |

|    |              |              |              |
|----|--------------|--------------|--------------|
| 6  | 2.046130000  | 2.847539000  | -0.065487000 |
| 1  | 2.480977000  | 1.987960000  | 0.484622000  |
| 6  | 2.451002000  | 4.131346000  | 0.637685000  |
| 1  | 3.552405000  | 4.211648000  | 0.695243000  |
| 1  | 2.099198000  | 5.021671000  | 0.086706000  |
| 1  | 2.064298000  | 4.194913000  | 1.668438000  |
| 6  | 2.586330000  | 2.803320000  | -1.487349000 |
| 1  | 3.692227000  | 2.790835000  | -1.498473000 |
| 1  | 2.215159000  | 1.904438000  | -2.016155000 |
| 1  | 2.267181000  | 3.688460000  | -2.067695000 |
| 15 | -2.317217000 | -0.806152000 | -0.045481000 |
| 15 | 0.219514000  | 2.339866000  | -0.061927000 |
| 15 | 2.026468000  | -1.307507000 | -0.196478000 |
| 14 | 0.051626000  | -0.102590000 | 1.982956000  |

[1c'<sub>PB</sub>] (TE = -2937.277050)

|    |              |              |              |
|----|--------------|--------------|--------------|
| 6  | -0.226152000 | 2.596447000  | 1.726398000  |
| 6  | 0.333761000  | 1.396725000  | 2.492032000  |
| 6  | -2.785221000 | -0.309930000 | 1.564044000  |
| 6  | -1.625342000 | -0.515435000 | 2.543059000  |
| 6  | 2.336447000  | -1.119422000 | 1.616477000  |
| 6  | 1.016567000  | -1.203711000 | 2.396273000  |
| 1  | -2.942371000 | 0.770187000  | 1.374248000  |
| 1  | -1.869145000 | 0.035172000  | 3.483861000  |
| 1  | 3.101180000  | -1.858025000 | 1.940433000  |
| 1  | 1.271180000  | -1.116710000 | 3.484369000  |
| 1  | 0.117999000  | 3.582767000  | 2.106495000  |
| 1  | 1.440247000  | 1.467759000  | 2.491636000  |
| 6  | -1.100143000 | 3.671213000  | -0.878562000 |
| 1  | -0.570603000 | 4.024420000  | -1.786943000 |
| 6  | -2.235540000 | -2.856132000 | 0.303289000  |
| 1  | -1.372857000 | -2.929448000 | 0.993092000  |
| 6  | 3.495599000  | -0.371898000 | -1.043696000 |
| 1  | 3.128191000  | 0.670011000  | -0.989710000 |
| 23 | -0.070175000 | 0.001998000  | -0.430458000 |
| 1  | -1.332123000 | 2.600533000  | 1.806806000  |
| 1  | 0.048213000  | 1.518726000  | 3.567383000  |
| 1  | 0.603718000  | -2.227942000 | 2.287121000  |
| 1  | 2.792980000  | -0.122818000 | 1.773055000  |
| 1  | -1.618813000 | -1.587663000 | 2.840375000  |
| 1  | -3.758151000 | -0.721887000 | 1.909098000  |
| 6  | 4.863809000  | -0.406769000 | -0.381855000 |
| 1  | 5.545382000  | 0.313443000  | -0.873269000 |
| 1  | 4.812678000  | -0.127622000 | 0.683639000  |
| 1  | 5.344565000  | -1.396379000 | -0.440958000 |
| 6  | 3.541900000  | -0.728109000 | -2.521623000 |

|    |              |              |              |
|----|--------------|--------------|--------------|
| 1  | 3.890989000  | -1.761333000 | -2.695498000 |
| 1  | 2.539743000  | -0.631736000 | -2.978324000 |
| 1  | 4.226326000  | -0.057085000 | -3.071763000 |
| 6  | -3.455583000 | -3.417258000 | 1.011939000  |
| 1  | -3.345763000 | -4.504664000 | 1.182802000  |
| 1  | -3.613345000 | -2.947087000 | 1.996111000  |
| 1  | -4.381803000 | -3.280798000 | 0.423689000  |
| 6  | -1.901425000 | -3.623648000 | -0.964512000 |
| 1  | -2.748233000 | -3.625417000 | -1.675627000 |
| 1  | -1.033681000 | -3.157373000 | -1.470858000 |
| 1  | -1.652375000 | -4.679357000 | -0.750750000 |
| 6  | -2.346914000 | 2.923643000  | -1.313312000 |
| 1  | -2.096483000 | 2.057726000  | -1.948868000 |
| 1  | -2.867672000 | 2.514197000  | -0.427379000 |
| 1  | -3.055333000 | 3.580896000  | -1.851627000 |
| 6  | -1.494446000 | 4.868863000  | -0.025740000 |
| 1  | -0.637308000 | 5.449129000  | 0.345132000  |
| 1  | -2.142370000 | 5.559654000  | -0.597016000 |
| 1  | -2.074857000 | 4.543430000  | 0.854639000  |
| 5  | -0.126487000 | -0.097321000 | 1.984159000  |
| 15 | 2.027042000  | -1.239848000 | -0.214764000 |
| 15 | -2.248931000 | -0.999971000 | -0.074115000 |
| 15 | 0.106907000  | 2.428325000  | -0.095052000 |
| 6  | 2.361428000  | -3.075631000 | -0.588160000 |
| 1  | 2.061006000  | -3.167850000 | -1.652403000 |
| 6  | 3.784750000  | -3.587064000 | -0.431018000 |
| 1  | 3.820247000  | -4.683544000 | -0.574353000 |
| 1  | 4.487045000  | -3.144271000 | -1.153804000 |
| 1  | 4.173374000  | -3.384807000 | 0.583610000  |
| 6  | 1.415763000  | -3.928316000 | 0.242196000  |
| 1  | 1.368565000  | -4.964353000 | -0.140060000 |
| 1  | 1.751493000  | -3.976607000 | 1.293238000  |
| 1  | 0.399274000  | -3.507956000 | 0.244090000  |
| 6  | -3.790870000 | -0.944562000 | -1.196809000 |
| 1  | -4.286940000 | -1.931800000 | -1.121502000 |
| 6  | -4.806487000 | 0.114389000  | -0.803326000 |
| 1  | -5.654798000 | 0.129113000  | -1.512909000 |
| 1  | -5.217575000 | -0.053713000 | 0.205143000  |
| 1  | -4.359308000 | 1.122947000  | -0.815100000 |
| 6  | -3.331061000 | -0.750581000 | -2.635110000 |
| 1  | -2.631503000 | -1.540483000 | -2.956717000 |
| 1  | -4.184104000 | -0.741330000 | -3.339496000 |
| 1  | -2.789871000 | 0.207048000  | -2.742214000 |
| 6  | 1.759776000  | 3.341087000  | -0.383487000 |
| 1  | 2.009560000  | 2.991881000  | -1.408252000 |
| 6  | 1.791079000  | 4.861048000  | -0.381533000 |

|   |             |             |              |
|---|-------------|-------------|--------------|
| 1 | 2.810953000 | 5.220931000 | -0.614983000 |
| 1 | 1.111813000 | 5.314197000 | -1.120833000 |
| 1 | 1.533984000 | 5.266833000 | 0.613473000  |
| 6 | 2.820661000 | 2.810694000 | 0.568615000  |
| 1 | 2.723148000 | 1.722854000 | 0.706765000  |
| 1 | 3.840602000 | 3.029145000 | 0.200985000  |
| 1 | 2.719970000 | 3.276248000 | 1.565165000  |

[1d'<sub>sc</sub>] (TE = -2766.144111)

|    |              |              |              |
|----|--------------|--------------|--------------|
| 6  | 0.379368000  | 2.202958000  | 1.577905000  |
| 6  | 0.356436000  | 0.941860000  | 2.432796000  |
| 6  | -2.700725000 | 0.445647000  | 1.302204000  |
| 6  | -1.767004000 | -0.407480000 | 2.144902000  |
| 6  | 1.785747000  | -1.809872000 | 1.612590000  |
| 6  | 0.443306000  | -1.560180000 | 2.280388000  |
| 1  | -2.500262000 | 1.524624000  | 1.428746000  |
| 1  | -1.978641000 | -0.167276000 | 3.222341000  |
| 1  | 2.292122000  | -2.703564000 | 2.024264000  |
| 1  | 0.627518000  | -1.573986000 | 3.389468000  |
| 1  | 0.873663000  | 3.042470000  | 2.104830000  |
| 1  | 1.413892000  | 0.722417000  | 2.694987000  |
| 6  | 0.796695000  | 3.270041000  | -1.054475000 |
| 1  | 1.520768000  | 3.156639000  | -1.884732000 |
| 6  | -3.439981000 | -1.496214000 | -0.635662000 |
| 1  | -3.699412000 | -1.742241000 | 0.410291000  |
| 6  | 3.202295000  | -1.342305000 | -0.784385000 |
| 1  | 3.326879000  | -0.407406000 | -0.204249000 |
| 23 | -0.056588000 | -0.188655000 | -0.404960000 |
| 16 | -2.433990000 | 0.143898000  | -0.523047000 |
| 16 | 1.293977000  | 1.799157000  | 0.006092000  |
| 16 | 1.528442000  | -2.009081000 | -0.230182000 |
| 6  | -0.283468000 | -0.302366000 | 1.807457000  |
| 1  | -0.639699000 | 2.518924000  | 1.292815000  |
| 1  | -0.127117000 | 1.215281000  | 3.407178000  |
| 1  | -0.194652000 | -2.445553000 | 2.080337000  |
| 1  | 2.460312000  | -0.941426000 | 1.736543000  |
| 1  | -2.088730000 | -1.462407000 | 2.017572000  |
| 1  | -3.769576000 | 0.282270000  | 1.546735000  |
| 6  | 4.310038000  | -2.326981000 | -0.482125000 |
| 1  | 5.292303000  | -1.937758000 | -0.807754000 |
| 1  | 4.381927000  | -2.551949000 | 0.595053000  |
| 1  | 4.131108000  | -3.278846000 | -1.013546000 |
| 6  | 3.094640000  | -1.001264000 | -2.252721000 |
| 1  | 2.885529000  | -1.905032000 | -2.855759000 |
| 1  | 2.258662000  | -0.287904000 | -2.411716000 |
| 1  | 4.034059000  | -0.550411000 | -2.621753000 |

|   |              |              |              |
|---|--------------|--------------|--------------|
| 6 | -4.687371000 | -1.231711000 | -1.446853000 |
| 1 | -5.306077000 | -2.141513000 | -1.561814000 |
| 1 | -5.312575000 | -0.448897000 | -0.984769000 |
| 1 | -4.415404000 | -0.882058000 | -2.459606000 |
| 6 | -2.555461000 | -2.571908000 | -1.212551000 |
| 1 | -2.225220000 | -2.299274000 | -2.234101000 |
| 1 | -1.631927000 | -2.670224000 | -0.609257000 |
| 1 | -3.074559000 | -3.547734000 | -1.256676000 |
| 6 | -0.597478000 | 3.088967000  | -1.601561000 |
| 1 | -0.664025000 | 2.104864000  | -2.113166000 |
| 1 | -1.358812000 | 3.086287000  | -0.800365000 |
| 1 | -0.852910000 | 3.893167000  | -2.315545000 |
| 6 | 1.026584000  | 4.593327000  | -0.357483000 |
| 1 | 2.036510000  | 4.649833000  | 0.083399000  |
| 1 | 0.915974000  | 5.434428000  | -1.065399000 |
| 1 | 0.293322000  | 4.754619000  | 0.451353000  |

[1e'<sub>ssi</sub>] (TE = -3017.507099)

|    |              |              |              |
|----|--------------|--------------|--------------|
| 23 | -0.048757000 | -0.076876000 | -0.885172000 |
| 16 | 1.697605000  | -1.843011000 | -0.965866000 |
| 16 | -2.310708000 | -1.099007000 | -1.170016000 |
| 16 | -0.257088000 | 2.061406000  | 0.291018000  |
| 14 | -0.294870000 | -0.838327000 | 1.421425000  |
| 6  | -0.264648000 | 0.634505000  | 2.687094000  |
| 6  | 0.444528000  | 1.807353000  | 2.025214000  |
| 6  | -2.460799000 | -2.297714000 | 0.263271000  |
| 6  | -1.983680000 | -1.793957000 | 1.618997000  |
| 6  | 1.152077000  | -2.056818000 | 1.859665000  |
| 6  | 1.536079000  | -2.846119000 | 0.620574000  |
| 1  | 0.730750000  | -3.550187000 | 0.340027000  |
| 1  | 2.455885000  | -3.451863000 | 0.721731000  |
| 1  | 2.007885000  | -1.436024000 | 2.197069000  |
| 1  | 0.929601000  | -2.762619000 | 2.686019000  |
| 1  | -3.499140000 | -2.681128000 | 0.264037000  |
| 1  | -1.820432000 | -3.122488000 | -0.099306000 |
| 1  | -2.730795000 | -1.093236000 | 2.043138000  |
| 1  | -1.939430000 | -2.653248000 | 2.318282000  |
| 1  | -1.313694000 | 0.921113000  | 2.904996000  |
| 1  | 0.216864000  | 0.418180000  | 3.661355000  |
| 1  | 1.525676000  | 1.595630000  | 1.906827000  |
| 1  | 0.331532000  | 2.754885000  | 2.585746000  |
| 6  | 3.260883000  | -0.875698000 | -0.620515000 |
| 1  | 2.926013000  | -0.084154000 | 0.079093000  |
| 6  | -3.445768000 | 0.259973000  | -0.599233000 |
| 1  | -2.977181000 | 0.661175000  | 0.320098000  |
| 6  | 0.854870000  | 3.460587000  | -0.285405000 |

|   |              |              |              |
|---|--------------|--------------|--------------|
| 1 | 0.336136000  | 3.723776000  | -1.227050000 |
| 6 | -4.850294000 | -0.231901000 | -0.323979000 |
| 1 | -5.509041000 | 0.612350000  | -0.050751000 |
| 1 | -5.273459000 | -0.715511000 | -1.222516000 |
| 1 | -4.889024000 | -0.958574000 | 0.503702000  |
| 6 | -3.409909000 | 1.332456000  | -1.668640000 |
| 1 | -2.360322000 | 1.611858000  | -1.885027000 |
| 1 | -3.867890000 | 0.967870000  | -2.606245000 |
| 1 | -3.961078000 | 2.231204000  | -1.338764000 |
| 6 | 0.856617000  | 4.653265000  | 0.646157000  |
| 1 | 1.417842000  | 4.441244000  | 1.572756000  |
| 1 | 1.342044000  | 5.523734000  | 0.168631000  |
| 1 | -0.168457000 | 4.946910000  | 0.929652000  |
| 6 | 2.231899000  | 2.943493000  | -0.625210000 |
| 1 | 2.842016000  | 3.713290000  | -1.132029000 |
| 1 | 2.780173000  | 2.621714000  | 0.279935000  |
| 1 | 2.125056000  | 2.063219000  | -1.290964000 |
| 6 | 3.658058000  | -0.241668000 | -1.937190000 |
| 1 | 4.458090000  | 0.506265000  | -1.789317000 |
| 1 | 4.019346000  | -1.007096000 | -2.647652000 |
| 1 | 2.774911000  | 0.255349000  | -2.386315000 |
| 6 | 4.376220000  | -1.706852000 | -0.026833000 |
| 1 | 5.300692000  | -1.106198000 | 0.049126000  |
| 1 | 4.139532000  | -2.074574000 | 0.984425000  |
| 1 | 4.594636000  | -2.579545000 | -0.668752000 |

[ $\mathbf{1f}_{SB}$ ] (TE = -2752.932711)

|    |              |              |              |
|----|--------------|--------------|--------------|
| 6  | 1.161427000  | 2.000131000  | 1.671488000  |
| 6  | 0.777998000  | 0.779256000  | 2.489903000  |
| 6  | -2.544666000 | 1.317993000  | 0.966992000  |
| 6  | -1.902471000 | 0.4444465000 | 2.037885000  |
| 6  | 0.970718000  | -2.403883000 | 1.581009000  |
| 6  | -0.262513000 | -1.726675000 | 2.154646000  |
| 1  | -2.023222000 | 2.286938000  | 0.863890000  |
| 1  | -1.950436000 | 1.036262000  | 2.987537000  |
| 1  | 1.079204000  | -3.472232000 | 1.852187000  |
| 1  | -0.241541000 | -1.916088000 | 3.259712000  |
| 1  | 1.973069000  | 2.619992000  | 2.103556000  |
| 1  | 1.704095000  | 0.191321000  | 2.675935000  |
| 6  | 1.740116000  | 2.920596000  | -1.010633000 |
| 1  | 1.995852000  | 2.488202000  | -1.997905000 |
| 6  | -3.751387000 | -0.783271000 | -0.519309000 |
| 1  | -3.688530000 | -1.050645000 | 0.550405000  |
| 6  | 2.777146000  | -2.061491000 | -0.592189000 |
| 1  | 3.082954000  | -1.229585000 | 0.070694000  |
| 23 | -0.168988000 | -0.092930000 | -0.540303000 |

|    |              |              |              |
|----|--------------|--------------|--------------|
| 16 | -2.436115000 | 0.618506000  | -0.745567000 |
| 16 | 1.705764000  | 1.365641000  | 0.022195000  |
| 16 | 0.957775000  | -2.282499000 | -0.268158000 |
| 1  | 0.278474000  | 2.645274000  | 1.502905000  |
| 1  | 0.453292000  | 1.146144000  | 3.495719000  |
| 1  | -1.162202000 | -2.269018000 | 1.789856000  |
| 1  | 1.888306000  | -1.878733000 | 1.907502000  |
| 1  | -2.584629000 | -0.414838000 | 2.219462000  |
| 1  | -3.614853000 | 1.544345000  | 1.159813000  |
| 6  | 3.559200000  | -3.318016000 | -0.277547000 |
| 1  | 4.638517000  | -3.172453000 | -0.468552000 |
| 1  | 3.445130000  | -3.620227000 | 0.776279000  |
| 1  | 3.211593000  | -4.155966000 | -0.907494000 |
| 6  | 2.924191000  | -1.624485000 | -2.033777000 |
| 1  | 2.561704000  | -2.408085000 | -2.724009000 |
| 1  | 2.330869000  | -0.709440000 | -2.215954000 |
| 1  | 3.981114000  | -1.417750000 | -2.278408000 |
| 6  | -5.118819000 | -0.250009000 | -0.876542000 |
| 1  | -5.905967000 | -1.016715000 | -0.745044000 |
| 1  | -5.395652000 | 0.620316000  | -0.257670000 |
| 1  | -5.141221000 | 0.073756000  | -1.933088000 |
| 6  | -3.313456000 | -1.946091000 | -1.371286000 |
| 1  | -3.289616000 | -1.661591000 | -2.441494000 |
| 1  | -2.286951000 | -2.254814000 | -1.094979000 |
| 1  | -3.994172000 | -2.810114000 | -1.264238000 |
| 6  | 0.379343000  | 3.575800000  | -1.105633000 |
| 1  | -0.399784000 | 2.807441000  | -1.277384000 |
| 1  | 0.126055000  | 4.110665000  | -0.172934000 |
| 1  | 0.348851000  | 4.314436000  | -1.926342000 |
| 6  | 2.833359000  | 3.872817000  | -0.572656000 |
| 1  | 3.811590000  | 3.368274000  | -0.517520000 |
| 1  | 2.922301000  | 4.725573000  | -1.270737000 |
| 1  | 2.613562000  | 4.291056000  | 0.425357000  |
| 5  | -0.380188000 | -0.136701000 | 1.778060000  |

[1a''<sub>PC</sub>]<sup>-</sup> (TE = -3407.080623)

|   |             |              |             |
|---|-------------|--------------|-------------|
| 6 | 0.970803000 | -1.005151000 | 1.626079000 |
| 6 | 1.717624000 | -0.696272000 | 2.781043000 |
| 1 | 1.462869000 | 0.213899000  | 3.336435000 |
| 6 | 2.759600000 | -1.502904000 | 3.238852000 |
| 1 | 3.318891000 | -1.209891000 | 4.134469000 |
| 6 | 3.070275000 | -2.684120000 | 2.572557000 |
| 1 | 3.882192000 | -3.330174000 | 2.922307000 |
| 6 | 2.340455000 | -3.024455000 | 1.430098000 |
| 1 | 2.612922000 | -3.936535000 | 0.886530000 |
| 6 | 1.326676000 | -2.201685000 | 0.925133000 |

|    |              |              |              |
|----|--------------|--------------|--------------|
| 6  | -0.013519000 | 1.317280000  | 1.620994000  |
| 6  | -0.806395000 | 1.825004000  | 2.670075000  |
| 1  | -1.503058000 | 1.147666000  | 3.176384000  |
| 6  | -0.750071000 | 3.157207000  | 3.074837000  |
| 1  | -1.398983000 | 3.505868000  | 3.885820000  |
| 6  | 0.134065000  | 4.034101000  | 2.453901000  |
| 1  | 0.189631000  | 5.085062000  | 2.755816000  |
| 6  | 0.949318000  | 3.554066000  | 1.427308000  |
| 1  | 1.635122000  | 4.252333000  | 0.938838000  |
| 6  | 0.880852000  | 2.226443000  | 0.987065000  |
| 6  | -1.517739000 | -0.632780000 | 1.446391000  |
| 6  | -1.782843000 | -1.476380000 | 2.539858000  |
| 1  | -0.938949000 | -1.815554000 | 3.152755000  |
| 6  | -3.076698000 | -1.875279000 | 2.870232000  |
| 1  | -3.239668000 | -2.534762000 | 3.730026000  |
| 6  | -4.159820000 | -1.418628000 | 2.123443000  |
| 1  | -5.181862000 | -1.716063000 | 2.379547000  |
| 6  | -3.925112000 | -0.576017000 | 1.033364000  |
| 1  | -4.778516000 | -0.221016000 | 0.446809000  |
| 6  | -2.629762000 | -0.200872000 | 0.663388000  |
| 6  | -0.141613000 | -0.111198000 | 1.172944000  |
| 23 | 0.081407000  | -0.097400000 | -1.074134000 |
| 6  | 2.117705000  | -3.116740000 | -1.761637000 |
| 1  | 2.514855000  | -4.014566000 | -1.251153000 |
| 6  | 1.822720000  | 3.168960000  | -1.643099000 |
| 1  | 0.840308000  | 3.635001000  | -1.418208000 |
| 6  | -3.480487000 | 0.238383000  | -2.217907000 |
| 1  | -2.985685000 | 0.708660000  | -3.094007000 |
| 6  | -4.903508000 | 0.771166000  | -2.150598000 |
| 1  | -5.462660000 | 0.464924000  | -3.053889000 |
| 1  | -5.466280000 | 0.380997000  | -1.286162000 |
| 1  | -4.942630000 | 1.870818000  | -2.106583000 |
| 6  | -3.448862000 | -1.263410000 | -2.455163000 |
| 1  | -3.896365000 | -1.816434000 | -1.609502000 |
| 1  | -4.012678000 | -1.530111000 | -3.366633000 |
| 1  | -2.405268000 | -1.612843000 | -2.572736000 |
| 6  | 1.656940000  | -3.488327000 | -3.163970000 |
| 1  | 0.982197000  | -4.359952000 | -3.184141000 |
| 1  | 1.117690000  | -2.630859000 | -3.616335000 |
| 1  | 2.520240000  | -3.722654000 | -3.812063000 |
| 6  | 3.194922000  | -2.053789000 | -1.838318000 |
| 1  | 3.575728000  | -1.773280000 | -0.840870000 |
| 1  | 4.050067000  | -2.389291000 | -2.453213000 |
| 1  | 2.761154000  | -1.140215000 | -2.294696000 |
| 6  | 2.917581000  | 4.204883000  | -1.425892000 |
| 1  | 2.738394000  | 5.086253000  | -2.068602000 |



|    |              |              |              |
|----|--------------|--------------|--------------|
| 1  | 2.992806000  | 4.569872000  | -0.389769000 |
| 1  | 3.908602000  | 3.810752000  | -1.705430000 |
| 6  | 1.798073000  | 2.726770000  | -3.100762000 |
| 1  | 2.748090000  | 2.239689000  | -3.388543000 |
| 1  | 0.993502000  | 1.983520000  | -3.272003000 |
| 1  | 1.645005000  | 3.588517000  | -3.776612000 |
| 15 | -2.193524000 | 0.680235000  | -0.905346000 |
| 15 | 1.711322000  | 1.617773000  | -0.552619000 |
| 15 | 0.648052000  | -2.421665000 | -0.791440000 |
| 6  | 3.470855000  | 1.209810000  | 0.029968000  |
| 1  | 3.285858000  | 0.203849000  | 0.459141000  |
| 6  | 4.439437000  | 1.051365000  | -1.133503000 |
| 1  | 4.811546000  | 2.026600000  | -1.490216000 |
| 1  | 5.324074000  | 0.463798000  | -0.827334000 |
| 1  | 3.979596000  | 0.534766000  | -1.991348000 |
| 6  | 4.057257000  | 2.078562000  | 1.129414000  |
| 1  | 5.019682000  | 1.658400000  | 1.476147000  |
| 1  | 4.259223000  | 3.106959000  | 0.781958000  |
| 1  | 3.389646000  | 2.145608000  | 2.002970000  |
| 6  | -0.452129000 | -3.964314000 | -0.759207000 |
| 1  | -0.700737000 | -4.087052000 | -1.832699000 |
| 6  | -1.741990000 | -3.695852000 | -0.009445000 |
| 1  | -1.560520000 | -3.647845000 | 1.077612000  |
| 1  | -2.188591000 | -2.732403000 | -0.302647000 |
| 1  | -2.479621000 | -4.498360000 | -0.189923000 |
| 6  | 0.204437000  | -5.235100000 | -0.246963000 |
| 1  | -0.503883000 | -6.082815000 | -0.291210000 |
| 1  | 1.099422000  | -5.528559000 | -0.819917000 |
| 1  | 0.502768000  | -5.118806000 | 0.810343000  |
| 6  | -2.460123000 | 2.509645000  | -0.532829000 |
| 1  | -1.566860000 | 2.699752000  | 0.091447000  |
| 6  | -3.677297000 | 2.900452000  | 0.287606000  |
| 1  | -3.618066000 | 3.967273000  | 0.572857000  |
| 1  | -4.625497000 | 2.761437000  | -0.258437000 |
| 1  | -3.738510000 | 2.315190000  | 1.219976000  |
| 6  | -2.294397000 | 3.329100000  | -1.802590000 |
| 1  | -2.171531000 | 4.401686000  | -1.565932000 |
| 1  | -1.396478000 | 2.996259000  | -2.356960000 |
| 1  | -3.162666000 | 3.240133000  | -2.480290000 |

[1b''<sub>psi</sub>] (TE = -3658.442058)

|   |             |              |             |
|---|-------------|--------------|-------------|
| 6 | 0.949934000 | -1.668698000 | 1.826277000 |
| 6 | 0.763968000 | -2.330209000 | 3.048102000 |
| 1 | 0.062504000 | -1.912447000 | 3.782905000 |
| 6 | 1.425085000 | -3.522821000 | 3.346691000 |
| 1 | 1.248111000 | -4.029104000 | 4.302102000 |

|    |              |              |              |
|----|--------------|--------------|--------------|
| 6  | 2.309403000  | -4.066724000 | 2.419014000  |
| 1  | 2.835502000  | -5.002160000 | 2.638412000  |
| 6  | 2.517189000  | -3.421685000 | 1.198117000  |
| 1  | 3.214561000  | -3.869024000 | 0.481791000  |
| 6  | 1.835001000  | -2.241846000 | 0.879783000  |
| 6  | 0.775454000  | 1.434521000  | 2.010162000  |
| 6  | 1.306858000  | 1.502151000  | 3.305027000  |
| 1  | 1.199183000  | 0.637829000  | 3.974434000  |
| 6  | 2.001938000  | 2.624012000  | 3.758887000  |
| 1  | 2.425030000  | 2.641661000  | 4.769381000  |
| 6  | 2.157602000  | 3.719485000  | 2.914272000  |
| 1  | 2.701345000  | 4.607773000  | 3.253653000  |
| 6  | 1.626434000  | 3.681316000  | 1.623759000  |
| 1  | 1.764325000  | 4.553218000  | 0.977507000  |
| 6  | 0.956262000  | 2.546892000  | 1.149461000  |
| 6  | -1.842780000 | -0.213128000 | 1.827977000  |
| 6  | -2.283949000 | 0.161760000  | 3.104948000  |
| 1  | -1.543227000 | 0.367866000  | 3.889272000  |
| 6  | -3.637421000 | 0.331756000  | 3.396451000  |
| 1  | -3.952663000 | 0.648616000  | 4.396731000  |
| 6  | -4.584244000 | 0.112522000  | 2.399212000  |
| 1  | -5.650118000 | 0.256295000  | 2.606636000  |
| 6  | -4.172536000 | -0.285925000 | 1.126989000  |
| 1  | -4.935085000 | -0.452379000 | 0.360342000  |
| 6  | -2.814194000 | -0.446503000 | 0.822360000  |
| 23 | 0.062438000  | 0.042578000  | -1.179999000 |
| 6  | 3.720512000  | -0.673907000 | -0.645344000 |
| 1  | 4.422442000  | -1.521432000 | -0.523985000 |
| 6  | -1.143814000 | 3.564806000  | -0.564228000 |
| 1  | -0.753846000 | 4.572660000  | -0.321129000 |
| 6  | -2.479586000 | -2.754263000 | -0.951263000 |
| 1  | -2.618622000 | -2.941276000 | -2.036819000 |
| 6  | -3.678327000 | -3.284355000 | -0.180307000 |
| 1  | -3.779786000 | -4.374555000 | -0.334204000 |
| 1  | -3.544090000 | -3.120178000 | 0.903082000  |
| 1  | -4.633768000 | -2.821451000 | -0.467237000 |
| 6  | -1.224424000 | -3.479983000 | -0.499449000 |
| 1  | -1.040810000 | -3.324844000 | 0.580505000  |
| 1  | -1.311041000 | -4.568140000 | -0.671030000 |
| 1  | -0.337569000 | -3.100381000 | -1.030059000 |
| 6  | 4.051684000  | 0.109347000  | -1.903852000 |
| 1  | 3.993494000  | -0.498738000 | -2.822643000 |
| 1  | 3.318631000  | 0.927684000  | -2.018452000 |
| 1  | 5.063147000  | 0.552212000  | -1.848198000 |
| 6  | 3.824916000  | 0.230628000  | 0.570572000  |
| 1  | 3.646490000  | -0.308333000 | 1.515629000  |

|    |              |              |              |
|----|--------------|--------------|--------------|
| 1  | 4.825460000  | 0.695749000  | 0.625150000  |
| 1  | 3.077241000  | 1.042132000  | 0.508598000  |
| 6  | -1.829846000 | 3.579958000  | -1.920099000 |
| 1  | -2.735675000 | 4.213487000  | -1.904525000 |
| 1  | -1.177030000 | 3.941078000  | -2.732417000 |
| 1  | -2.129771000 | 2.549035000  | -2.185709000 |
| 6  | -2.126003000 | 3.139172000  | 0.512863000  |
| 1  | -2.465489000 | 2.103064000  | 0.332575000  |
| 1  | -1.683015000 | 3.164595000  | 1.522192000  |
| 1  | -3.016357000 | 3.793082000  | 0.512800000  |
| 14 | -0.020643000 | -0.128124000 | 1.213579000  |
| 15 | 0.338911000  | 2.386150000  | -0.623071000 |
| 15 | -2.182222000 | -0.872779000 | -0.896837000 |
| 15 | 1.978955000  | -1.405861000 | -0.803493000 |
| 6  | 2.270916000  | -2.901596000 | -1.968328000 |
| 1  | 1.689243000  | -3.704407000 | -1.474199000 |
| 6  | 3.694762000  | -3.397996000 | -2.173206000 |
| 1  | 3.697775000  | -4.296702000 | -2.816875000 |
| 1  | 4.318041000  | -2.643361000 | -2.683132000 |
| 1  | 4.210783000  | -3.669129000 | -1.238003000 |
| 6  | 1.617692000  | -2.606787000 | -3.311431000 |
| 1  | 0.584577000  | -2.226284000 | -3.182561000 |
| 1  | 2.163889000  | -1.812235000 | -3.854062000 |
| 1  | 1.598040000  | -3.507560000 | -3.953470000 |
| 6  | -3.521087000 | -0.195710000 | -2.077260000 |
| 1  | -3.748905000 | 0.791976000  | -1.623778000 |
| 6  | -2.848171000 | 0.039882000  | -3.424238000 |
| 1  | -2.615709000 | -0.922920000 | -3.918982000 |
| 1  | -3.502657000 | 0.619094000  | -4.102641000 |
| 1  | -1.877292000 | 0.564455000  | -3.306594000 |
| 6  | -4.821383000 | -0.955552000 | -2.299590000 |
| 1  | -4.631538000 | -1.961362000 | -2.714138000 |
| 1  | -5.434490000 | -1.079756000 | -1.393784000 |
| 1  | -5.448143000 | -0.424632000 | -3.039230000 |
| 6  | 1.614604000  | 3.395638000  | -1.628732000 |
| 1  | 2.563689000  | 3.127265000  | -1.119163000 |
| 6  | 1.489823000  | 4.912132000  | -1.680528000 |
| 1  | 2.331714000  | 5.345445000  | -2.251052000 |
| 1  | 0.566963000  | 5.219600000  | -2.202283000 |
| 1  | 1.483822000  | 5.401485000  | -0.694297000 |
| 6  | 1.663483000  | 2.840547000  | -3.047313000 |
| 1  | 1.612708000  | 1.731981000  | -3.049468000 |
| 1  | 0.793468000  | 3.183685000  | -3.637175000 |
| 1  | 2.578246000  | 3.168569000  | -3.576042000 |

[1c''<sub>PB</sub>] (TE = -3393.874450)

|    |              |              |              |
|----|--------------|--------------|--------------|
| 6  | 0.889783000  | -1.252040000 | 1.704476000  |
| 6  | 0.568290000  | -2.029044000 | 2.841407000  |
| 1  | -0.347800000 | -1.782547000 | 3.394979000  |
| 6  | 1.364743000  | -3.076605000 | 3.298464000  |
| 1  | 1.067240000  | -3.641147000 | 4.190455000  |
| 6  | 2.551150000  | -3.395265000 | 2.635057000  |
| 1  | 3.195117000  | -4.206650000 | 2.991177000  |
| 6  | 2.895408000  | -2.668418000 | 1.495670000  |
| 1  | 3.814350000  | -2.934498000 | 0.958939000  |
| 6  | 2.074789000  | -1.640064000 | 1.014660000  |
| 6  | 0.536457000  | 1.425441000  | 1.683777000  |
| 6  | 1.302049000  | 1.601839000  | 2.857721000  |
| 1  | 1.597361000  | 0.706019000  | 3.421541000  |
| 6  | 1.663869000  | 2.853923000  | 3.346162000  |
| 1  | 2.248292000  | 2.933163000  | 4.270819000  |
| 6  | 1.252484000  | 4.011813000  | 2.680074000  |
| 1  | 1.503391000  | 5.003707000  | 3.071256000  |
| 6  | 0.525165000  | 3.883095000  | 1.497863000  |
| 1  | 0.218350000  | 4.789697000  | 0.962977000  |
| 6  | 0.211204000  | 2.620939000  | 0.973935000  |
| 6  | -1.574620000 | -0.192477000 | 1.648826000  |
| 6  | -2.109331000 | 0.386555000  | 2.820271000  |
| 1  | -1.440332000 | 0.984491000  | 3.454438000  |
| 6  | -3.440689000 | 0.236548000  | 3.198604000  |
| 1  | -3.806229000 | 0.708179000  | 4.118741000  |
| 6  | -4.311477000 | -0.517681000 | 2.409201000  |
| 1  | -5.362265000 | -0.640460000 | 2.693108000  |
| 6  | -3.824370000 | -1.107204000 | 1.243944000  |
| 1  | -4.513013000 | -1.685387000 | 0.617950000  |
| 6  | -2.486335000 | -0.943793000 | 0.857526000  |
| 23 | 0.103820000  | 0.015626000  | -1.072395000 |
| 6  | 4.019376000  | -0.045623000 | -0.489526000 |
| 1  | 4.748874000  | -0.825887000 | -0.195591000 |
| 6  | -2.142440000 | 3.171302000  | -0.778969000 |
| 1  | -2.016493000 | 4.248940000  | -0.556918000 |
| 6  | -1.807875000 | -3.365844000 | -0.765085000 |
| 1  | -1.934855000 | -3.622671000 | -1.838331000 |
| 6  | -2.897870000 | -4.040748000 | 0.051403000  |
| 1  | -2.806192000 | -5.140311000 | -0.019599000 |
| 1  | -2.798323000 | -3.771825000 | 1.117471000  |
| 1  | -3.917803000 | -3.774466000 | -0.264014000 |
| 6  | -0.447184000 | -3.865115000 | -0.313008000 |
| 1  | -0.279325000 | -3.642016000 | 0.756096000  |
| 1  | -0.356511000 | -4.957517000 | -0.451270000 |

|    |              |              |              |
|----|--------------|--------------|--------------|
| 1  | 0.359792000  | -3.362905000 | -0.866451000 |
| 6  | 4.456101000  | 0.568404000  | -1.811070000 |
| 1  | 4.535625000  | -0.168182000 | -2.626578000 |
| 1  | 3.740751000  | 1.339567000  | -2.142112000 |
| 1  | 5.441298000  | 1.058851000  | -1.710533000 |
| 6  | 3.966548000  | 1.004542000  | 0.607677000  |
| 1  | 3.746415000  | 0.560312000  | 1.591516000  |
| 1  | 4.928481000  | 1.543562000  | 0.679989000  |
| 1  | 3.173215000  | 1.749182000  | 0.414010000  |
| 6  | -2.728547000 | 2.996345000  | -2.171644000 |
| 1  | -3.751120000 | 3.410208000  | -2.232202000 |
| 1  | -2.127037000 | 3.476117000  | -2.962241000 |
| 1  | -2.788669000 | 1.918184000  | -2.413290000 |
| 6  | -3.060222000 | 2.564116000  | 0.262987000  |
| 1  | -3.151114000 | 1.474061000  | 0.113827000  |
| 1  | -2.682554000 | 2.711747000  | 1.286974000  |
| 1  | -4.070857000 | 3.006169000  | 0.198832000  |
| 5  | -0.022944000 | -0.012585000 | 1.242410000  |
| 15 | 2.343625000  | -0.903122000 | -0.654380000 |
| 15 | -0.425548000 | 2.391002000  | -0.736826000 |
| 15 | -1.822335000 | -1.467594000 | -0.776328000 |
| 6  | 0.504142000  | 3.656303000  | -1.831486000 |
| 1  | 0.282228000  | 3.245074000  | -2.838221000 |
| 6  | 1.996905000  | 3.507372000  | -1.604917000 |
| 1  | 2.581571000  | 3.978493000  | -2.415442000 |
| 1  | 2.308181000  | 3.966591000  | -0.649994000 |
| 1  | 2.259578000  | 2.438141000  | -1.551710000 |
| 6  | 0.093143000  | 5.120759000  | -1.835355000 |
| 1  | 0.695066000  | 5.678891000  | -2.576308000 |
| 1  | -0.965077000 | 5.275773000  | -2.099364000 |
| 1  | 0.269052000  | 5.605213000  | -0.860304000 |
| 6  | 2.788799000  | -2.413070000 | -1.738932000 |
| 1  | 2.232515000  | -3.218758000 | -1.225845000 |
| 6  | 4.235633000  | -2.868733000 | -1.855576000 |
| 1  | 4.290801000  | -3.813278000 | -2.427423000 |
| 1  | 4.866649000  | -2.139466000 | -2.390231000 |
| 1  | 4.707661000  | -3.058473000 | -0.878606000 |
| 6  | 2.160432000  | -2.218716000 | -3.113301000 |
| 1  | 2.251841000  | -3.128277000 | -3.735193000 |
| 1  | 1.083598000  | -1.976153000 | -3.015315000 |
| 1  | 2.639742000  | -1.389728000 | -3.666375000 |
| 6  | -3.188521000 | -1.091676000 | -2.044301000 |
| 1  | -3.567149000 | -0.113208000 | -1.685062000 |
| 6  | -2.482512000 | -0.867707000 | -3.377105000 |
| 1  | -2.029064000 | -1.804836000 | -3.752139000 |
| 1  | -3.179823000 | -0.503410000 | -4.154051000 |

|   |              |              |              |
|---|--------------|--------------|--------------|
| 1 | -1.667718000 | -0.125190000 | -3.269711000 |
| 6 | -4.367654000 | -2.033171000 | -2.229543000 |
| 1 | -4.041250000 | -3.036577000 | -2.555907000 |
| 1 | -4.971821000 | -2.155709000 | -1.317217000 |
| 1 | -5.044841000 | -1.649400000 | -3.014794000 |

[1d''<sub>sc</sub>] (TE = -3222.720508)

|    |              |              |              |
|----|--------------|--------------|--------------|
| 6  | 1.028560000  | 1.073683000  | 1.002048000  |
| 6  | 2.003247000  | 0.928348000  | 1.996430000  |
| 1  | 2.069825000  | -0.034630000 | 2.516748000  |
| 6  | 2.867526000  | 1.982737000  | 2.364038000  |
| 1  | 3.628511000  | 1.822623000  | 3.135398000  |
| 6  | 2.738233000  | 3.226713000  | 1.746128000  |
| 1  | 3.393501000  | 4.057988000  | 2.032179000  |
| 6  | 1.789347000  | 3.408726000  | 0.743553000  |
| 1  | 1.708245000  | 4.370006000  | 0.222078000  |
| 6  | 0.946752000  | 2.337978000  | 0.350143000  |
| 6  | -1.281953000 | 0.149987000  | 1.267697000  |
| 6  | -1.452792000 | 0.801564000  | 2.497779000  |
| 1  | -0.562806000 | 1.218235000  | 2.984859000  |
| 6  | -2.704982000 | 0.896247000  | 3.125818000  |
| 1  | -2.797045000 | 1.418408000  | 4.084297000  |
| 6  | -3.826964000 | 0.321580000  | 2.528856000  |
| 1  | -4.806973000 | 0.380553000  | 3.015828000  |
| 6  | -3.703781000 | -0.301729000 | 1.289372000  |
| 1  | -4.584714000 | -0.713961000 | 0.783415000  |
| 6  | -2.448209000 | -0.373465000 | 0.651004000  |
| 6  | 0.640515000  | -1.395137000 | 0.958096000  |
| 6  | 0.274723000  | -2.107177000 | 2.111995000  |
| 1  | -0.435809000 | -1.640855000 | 2.803375000  |
| 6  | 0.791677000  | -3.379095000 | 2.406104000  |
| 1  | 0.469448000  | -3.900785000 | 3.313829000  |
| 6  | 1.704112000  | -3.974189000 | 1.540280000  |
| 1  | 2.109194000  | -4.969678000 | 1.753266000  |
| 6  | 2.085901000  | -3.301571000 | 0.379645000  |
| 1  | 2.773116000  | -3.770353000 | -0.333504000 |
| 6  | 1.564604000  | -2.025425000 | 0.085258000  |
| 16 | 1.826739000  | -1.395707000 | -1.576568000 |
| 16 | 0.174178000  | 2.442399000  | -1.262365000 |
| 16 | -2.423176000 | -0.751989000 | -1.105798000 |
| 23 | -0.161982000 | 0.027955000  | -1.487330000 |
| 6  | -1.334477000 | 3.569674000  | -1.065434000 |
| 1  | -0.901625000 | 4.580549000  | -0.942404000 |
| 6  | -2.709959000 | -2.622674000 | -1.234010000 |
| 1  | -3.766430000 | -2.763996000 | -0.938593000 |
| 6  | 3.553519000  | -0.540471000 | -1.577190000 |

|   |              |              |              |
|---|--------------|--------------|--------------|
| 1 | 4.037624000  | -1.041635000 | -2.435873000 |
| 6 | 4.332030000  | -0.809673000 | -0.313218000 |
| 1 | 5.330149000  | -0.340862000 | -0.385828000 |
| 1 | 3.818417000  | -0.370299000 | 0.559271000  |
| 1 | 4.472350000  | -1.884660000 | -0.122459000 |
| 6 | 3.394741000  | 0.932768000  | -1.862325000 |
| 1 | 2.987564000  | 1.461922000  | -0.983832000 |
| 1 | 4.372058000  | 1.384735000  | -2.111522000 |
| 1 | 2.707658000  | 1.116078000  | -2.707080000 |
| 6 | -2.070107000 | 3.466226000  | -2.382416000 |
| 1 | -1.435600000 | 3.760101000  | -3.235612000 |
| 1 | -2.390450000 | 2.418421000  | -2.542155000 |
| 1 | -2.971183000 | 4.103114000  | -2.385785000 |
| 6 | -2.200395000 | 3.218257000  | 0.114283000  |
| 1 | -1.624227000 | 3.194800000  | 1.053005000  |
| 1 | -3.017544000 | 3.953714000  | 0.224374000  |
| 1 | -2.649904000 | 2.218938000  | -0.019057000 |
| 6 | -2.512297000 | -2.934668000 | -2.699739000 |
| 1 | -2.644024000 | -4.011777000 | -2.898858000 |
| 1 | -3.209396000 | -2.373371000 | -3.344403000 |
| 1 | -1.479112000 | -2.654336000 | -2.988633000 |
| 6 | -1.784880000 | -3.415376000 | -0.351305000 |
| 1 | -0.734894000 | -3.220214000 | -0.635595000 |
| 1 | -1.893437000 | -3.146449000 | 0.711167000  |
| 1 | -1.979656000 | -4.497582000 | -0.458475000 |
| 6 | 0.080370000  | -0.037151000 | 0.658743000  |

[1e''<sub>ssi</sub>]- (TE = -3474.066383)

|   |             |              |              |
|---|-------------|--------------|--------------|
| 6 | 1.455493000 | -1.265124000 | 1.303224000  |
| 6 | 1.625253000 | -1.751025000 | 2.607331000  |
| 1 | 0.935204000 | -1.411824000 | 3.391835000  |
| 6 | 2.629368000 | -2.664723000 | 2.933018000  |
| 1 | 2.739483000 | -3.017488000 | 3.964268000  |
| 6 | 3.486160000 | -3.138014000 | 1.938814000  |
| 1 | 4.268324000 | -3.865231000 | 2.181105000  |
| 6 | 3.322962000 | -2.704218000 | 0.624787000  |
| 1 | 3.960706000 | -3.100728000 | -0.173943000 |
| 6 | 2.322415000 | -1.775402000 | 0.318492000  |
| 6 | 0.578057000 | 1.702150000  | 1.269906000  |
| 6 | 1.065242000 | 2.067663000  | 2.541702000  |
| 1 | 1.185996000 | 1.289858000  | 3.307337000  |
| 6 | 1.404955000 | 3.381786000  | 2.858369000  |
| 1 | 1.779506000 | 3.622076000  | 3.859998000  |
| 6 | 1.277670000 | 4.391105000  | 1.903653000  |
| 1 | 1.549022000 | 5.424327000  | 2.142830000  |
| 6 | 0.822768000 | 4.061436000  | 0.621552000  |

|    |              |              |              |
|----|--------------|--------------|--------------|
| 1  | 0.749737000  | 4.830789000  | -0.156191000 |
| 6  | 0.483877000  | 2.743329000  | 0.318536000  |
| 6  | -1.630890000 | -0.471830000 | 1.356860000  |
| 6  | -2.145380000 | -0.085969000 | 2.607301000  |
| 1  | -1.441031000 | 0.306939000  | 3.356942000  |
| 6  | -3.496425000 | -0.135931000 | 2.937710000  |
| 1  | -3.838367000 | 0.178812000  | 3.929899000  |
| 6  | -4.435612000 | -0.563397000 | 1.947917000  |
| 1  | -5.508200000 | -0.585311000 | 2.172511000  |
| 6  | -3.986679000 | -0.937984000 | 0.698432000  |
| 1  | -4.706791000 | -1.235385000 | -0.075840000 |
| 6  | -2.606094000 | -0.938136000 | 0.372207000  |
| 16 | -2.166712000 | -1.246751000 | -1.323071000 |
| 16 | 2.130353000  | -1.314954000 | -1.437816000 |
| 16 | -0.016100000 | 2.402418000  | -1.399347000 |
| 23 | 0.029248000  | -0.059024000 | -1.692447000 |
| 6  | 3.640648000  | -0.190901000 | -1.645231000 |
| 1  | 4.512665000  | -0.852027000 | -1.486508000 |
| 6  | -1.766805000 | 3.104570000  | -1.390073000 |
| 1  | -1.629685000 | 4.198125000  | -1.293927000 |
| 6  | -1.841273000 | -3.119749000 | -1.403617000 |
| 1  | -1.397115000 | -3.213852000 | -2.415685000 |
| 6  | -3.159977000 | -3.854699000 | -1.323530000 |
| 1  | -3.017397000 | -4.946376000 | -1.423196000 |
| 1  | -3.631699000 | -3.668486000 | -0.342196000 |
| 1  | -3.862413000 | -3.522671000 | -2.105811000 |
| 6  | -0.861108000 | -3.575019000 | -0.352339000 |
| 1  | -1.242022000 | -3.339350000 | 0.657525000  |
| 1  | -0.696875000 | -4.666220000 | -0.411340000 |
| 1  | 0.110857000  | -3.070604000 | -0.468131000 |
| 6  | 3.582516000  | 0.294941000  | -3.075562000 |
| 1  | 3.627155000  | -0.535318000 | -3.799920000 |
| 1  | 2.627040000  | 0.836454000  | -3.229466000 |
| 1  | 4.409508000  | 0.992497000  | -3.291915000 |
| 6  | 3.631702000  | 0.948202000  | -0.657478000 |
| 1  | 3.652225000  | 0.597319000  | 0.386975000  |
| 1  | 4.502195000  | 1.608218000  | -0.818869000 |
| 1  | 2.711219000  | 1.544526000  | -0.788634000 |
| 6  | -2.340520000 | 2.758083000  | -2.746232000 |
| 1  | -3.376854000 | 3.124596000  | -2.839237000 |
| 1  | -1.745815000 | 3.185174000  | -3.571309000 |
| 1  | -2.355424000 | 1.656492000  | -2.864079000 |
| 6  | -2.604818000 | 2.561947000  | -0.258620000 |
| 1  | -2.691368000 | 1.463740000  | -0.334076000 |
| 1  | -2.179318000 | 2.796364000  | 0.730031000  |
| 1  | -3.622357000 | 2.989681000  | -0.303775000 |



|                                           |              |              |              |
|-------------------------------------------|--------------|--------------|--------------|
| 14                                        | 0.076249000  | -0.054821000 | 0.697145000  |
| [1f'' <sub>SB</sub> ] (TE = -3209.519336) |              |              |              |
| 6                                         | 0.129041000  | -1.676503000 | 1.045052000  |
| 6                                         | -0.404568000 | -2.253175000 | 2.218600000  |
| 1                                         | -0.927085000 | -1.592873000 | 2.924506000  |
| 6                                         | -0.290031000 | -3.608173000 | 2.521895000  |
| 1                                         | -0.717619000 | -3.998679000 | 3.452977000  |
| 6                                         | 0.374722000  | -4.470555000 | 1.647036000  |
| 1                                         | 0.472501000  | -5.536872000 | 1.876773000  |
| 6                                         | 0.886333000  | -3.956158000 | 0.456998000  |
| 1                                         | 1.362799000  | -4.619877000 | -0.274798000 |
| 6                                         | 0.754396000  | -2.594394000 | 0.166350000  |
| 6                                         | 1.320642000  | 0.716356000  | 1.246620000  |
| 6                                         | 1.993817000  | 0.374969000  | 2.441016000  |
| 1                                         | 1.607074000  | -0.472699000 | 3.023161000  |
| 6                                         | 3.112207000  | 1.057831000  | 2.913617000  |
| 1                                         | 3.586066000  | 0.747587000  | 3.852499000  |
| 6                                         | 3.626019000  | 2.141883000  | 2.199155000  |
| 1                                         | 4.503038000  | 2.689250000  | 2.560558000  |
| 6                                         | 3.019355000  | 2.498065000  | 0.995585000  |
| 1                                         | 3.435084000  | 3.308983000  | 0.385048000  |
| 6                                         | 1.902960000  | 1.794491000  | 0.529059000  |
| 6                                         | -1.366177000 | 0.580103000  | 1.152074000  |
| 6                                         | -1.513152000 | 1.259961000  | 2.383678000  |
| 1                                         | -0.647841000 | 1.281342000  | 3.060021000  |
| 6                                         | -2.686869000 | 1.897621000  | 2.776367000  |
| 1                                         | -2.738209000 | 2.397616000  | 3.750906000  |
| 6                                         | -3.797315000 | 1.901749000  | 1.930098000  |
| 1                                         | -4.724715000 | 2.407319000  | 2.219132000  |
| 6                                         | -3.695169000 | 1.274613000  | 0.689635000  |
| 1                                         | -4.529900000 | 1.322380000  | -0.018724000 |
| 6                                         | -2.512120000 | 0.625358000  | 0.311317000  |
| 16                                        | -2.386527000 | 0.115687000  | -1.418856000 |
| 16                                        | 1.155712000  | -2.058422000 | -1.508347000 |
| 16                                        | 1.391242000  | 2.115105000  | -1.172525000 |
| 23                                        | 0.058183000  | 0.123782000  | -1.495963000 |
| 6                                         | 3.046384000  | -2.015612000 | -1.527816000 |
| 1                                         | 3.352076000  | -3.079032000 | -1.532997000 |
| 6                                         | 0.442502000  | 3.761062000  | -1.054424000 |
| 1                                         | 1.218170000  | 4.512170000  | -0.813878000 |
| 6                                         | -3.296416000 | -1.547706000 | -1.494742000 |
| 1                                         | -3.067532000 | -1.827760000 | -2.541450000 |
| 6                                         | -4.786335000 | -1.350408000 | -1.324884000 |
| 1                                         | -5.329989000 | -2.292726000 | -1.519891000 |
| 1                                         | -5.020783000 | -1.045597000 | -0.290055000 |
| 1                                         | -5.179715000 | -0.578111000 | -2.006131000 |

|   |              |              |              |
|---|--------------|--------------|--------------|
| 6 | -2.730033000 | -2.575523000 | -0.550338000 |
| 1 | -2.873558000 | -2.264473000 | 0.499314000  |
| 1 | -3.230274000 | -3.550974000 | -0.688873000 |
| 1 | -1.649005000 | -2.708134000 | -0.707647000 |
| 6 | 3.404614000  | -1.346753000 | -2.835758000 |
| 1 | 3.015458000  | -1.901387000 | -3.706174000 |
| 1 | 2.959498000  | -0.332112000 | -2.849968000 |
| 1 | 4.497900000  | -1.247419000 | -2.946713000 |
| 6 | 3.625691000  | -1.294255000 | -0.338443000 |
| 1 | 3.326497000  | -1.759532000 | 0.614102000  |
| 1 | 4.729098000  | -1.288102000 | -0.392180000 |
| 1 | 3.270308000  | -0.249392000 | -0.321615000 |
| 6 | -0.117717000 | 3.977795000  | -2.441000000 |
| 1 | -0.726371000 | 4.897024000  | -2.488152000 |
| 1 | 0.674065000  | 4.043129000  | -3.206120000 |
| 1 | -0.769415000 | 3.117994000  | -2.697394000 |
| 6 | -0.635447000 | 3.725849000  | -0.005254000 |
| 1 | -1.344820000 | 2.910112000  | -0.233240000 |
| 1 | -0.230594000 | 3.537898000  | 1.001703000  |
| 1 | -1.193377000 | 4.679459000  | 0.015097000  |
| 5 | 0.028427000  | -0.100469000 | 0.738810000  |

Cartesian coordinates of  $[2\mathbf{a}'_{\text{PC}}]-[2\mathbf{f}'_{\text{SB}}]$ ,  $[2\mathbf{a}''_{\text{PC}}]-[2\mathbf{f}''_{\text{SB}}]$  and  $\{[\text{HIPTN}_3\text{N}]-\text{V}-\text{N}_2\}$ , along with their total energies (in hartree) including zero point vibrational correction at M06-L-D3(heptane)/6-311+G\* level of theory.

$[2\mathbf{a}'_{\text{PC}}]$  (TE = -3062.105256)

|    |              |              |              |
|----|--------------|--------------|--------------|
| 6  | -0.049391000 | 2.453084000  | 1.934138000  |
| 6  | 0.575066000  | 1.195316000  | 2.525208000  |
| 6  | -2.613424000 | -0.009144000 | 1.675972000  |
| 6  | -1.422360000 | -0.326223000 | 2.580136000  |
| 6  | 2.266203000  | -1.329893000 | 1.885844000  |
| 6  | 0.869750000  | -1.264575000 | 2.500405000  |
| 1  | -2.699760000 | 1.070050000  | 1.488967000  |
| 1  | -1.541766000 | 0.237510000  | 3.524550000  |
| 1  | 2.837697000  | -2.197761000 | 2.242116000  |
| 1  | 0.976104000  | -1.221729000 | 3.604949000  |
| 1  | 0.347911000  | 3.372597000  | 2.382914000  |
| 1  | 1.658498000  | 1.235671000  | 2.333746000  |
| 6  | -0.855501000 | 3.774552000  | -0.594482000 |
| 1  | -0.234986000 | 4.227329000  | -1.382670000 |
| 6  | -2.586760000 | -2.603193000 | 0.358670000  |
| 1  | -1.833730000 | -2.762953000 | 1.147747000  |
| 6  | 3.708748000  | -0.473604000 | -0.520482000 |
| 1  | 3.475244000  | 0.576222000  | -0.284685000 |
| 23 | 0.010967000  | -0.059470000 | -0.352377000 |

|   |              |              |              |
|---|--------------|--------------|--------------|
| 6 | -0.009749000 | -0.115998000 | 1.978681000  |
| 1 | -1.131075000 | 2.464865000  | 2.118251000  |
| 1 | 0.482848000  | 1.237691000  | 3.630253000  |
| 1 | 0.358788000  | -2.217259000 | 2.303814000  |
| 1 | 2.854168000  | -0.449152000 | 2.172588000  |
| 1 | -1.526221000 | -1.379069000 | 2.884968000  |
| 1 | -3.563654000 | -0.317905000 | 2.133075000  |
| 6 | 5.006612000  | -0.812996000 | 0.204699000  |
| 1 | 5.780040000  | -0.078208000 | -0.048432000 |
| 1 | 4.896767000  | -0.798234000 | 1.292762000  |
| 1 | 5.403344000  | -1.791909000 | -0.069882000 |
| 6 | 3.851706000  | -0.577040000 | -2.034115000 |
| 1 | 4.111068000  | -1.593074000 | -2.350267000 |
| 1 | 2.928687000  | -0.302695000 | -2.555006000 |
| 1 | 4.645009000  | 0.083290000  | -2.401882000 |
| 6 | -3.943626000 | -3.018581000 | 0.909571000  |
| 1 | -3.925385000 | -4.064181000 | 1.238929000  |
| 1 | -4.254980000 | -2.416294000 | 1.768238000  |
| 1 | -4.728700000 | -2.943545000 | 0.149936000  |
| 6 | -2.180500000 | -3.468237000 | -0.832563000 |
| 1 | -2.962854000 | -3.508567000 | -1.594430000 |
| 1 | -1.269133000 | -3.099975000 | -1.318022000 |
| 1 | -1.991764000 | -4.500278000 | -0.516198000 |
| 6 | -2.105718000 | 3.202405000  | -1.248498000 |
| 1 | -1.869188000 | 2.438398000  | -1.995776000 |
| 1 | -2.757745000 | 2.733998000  | -0.500436000 |
| 1 | -2.692768000 | 3.987740000  | -1.738267000 |
| 6 | -1.234124000 | 4.856860000  | 0.410279000  |
| 1 | -0.374266000 | 5.292830000  | 0.922916000  |
| 1 | -1.768143000 | 5.674718000  | -0.087181000 |
| 1 | -1.905870000 | 4.464408000  | 1.180912000  |
| 6 | 2.258979000  | -3.104423000 | -0.469351000 |
| 1 | 1.959811000  | -3.092412000 | -1.529070000 |
| 6 | 1.228517000  | -3.919255000 | 0.305289000  |
| 1 | 1.541313000  | -4.061444000 | 1.345876000  |
| 1 | 0.246261000  | -3.441114000 | 0.320589000  |
| 1 | 1.109842000  | -4.915773000 | -0.134014000 |
| 6 | 3.626787000  | -3.763091000 | -0.353542000 |
| 1 | 3.554882000  | -4.832618000 | -0.584577000 |
| 1 | 4.364378000  | -3.339510000 | -1.037720000 |
| 1 | 4.031785000  | -3.685404000 | 0.661839000  |
| 6 | -3.771771000 | -0.177082000 | -1.011205000 |
| 1 | -3.397721000 | 0.789209000  | -1.374176000 |
| 6 | -5.070172000 | 0.088032000  | -0.258684000 |
| 1 | -5.491611000 | -0.819752000 | 0.182186000  |
| 1 | -4.943759000 | 0.814450000  | 0.548552000  |

|    |              |              |              |
|----|--------------|--------------|--------------|
| 1  | -5.827386000 | 0.493813000  | -0.940072000 |
| 6  | -4.004902000 | -1.050697000 | -2.237643000 |
| 1  | -4.486354000 | -1.998041000 | -1.975422000 |
| 1  | -4.669401000 | -0.545607000 | -2.947114000 |
| 1  | -3.077571000 | -1.286003000 | -2.769233000 |
| 6  | 1.939944000  | 3.084381000  | -0.092148000 |
| 1  | 2.539150000  | 2.409763000  | 0.539501000  |
| 6  | 2.163520000  | 4.512463000  | 0.381721000  |
| 1  | 3.224939000  | 4.779198000  | 0.318465000  |
| 1  | 1.622205000  | 5.233648000  | -0.240294000 |
| 1  | 1.855535000  | 4.670121000  | 1.419529000  |
| 6  | 2.393662000  | 2.909565000  | -1.536554000 |
| 1  | 3.455536000  | 3.155136000  | -1.652747000 |
| 1  | 2.245436000  | 1.884993000  | -1.891565000 |
| 1  | 1.840306000  | 3.570819000  | -2.214138000 |
| 15 | -2.333146000 | -0.778647000 | 0.024800000  |
| 15 | 0.209575000  | 2.397245000  | 0.110051000  |
| 15 | 2.128390000  | -1.304349000 | 0.044840000  |
| 7  | -0.006055000 | -0.250973000 | -3.500892000 |
| 7  | 0.006737000  | -0.171837000 | -2.368207000 |

[2b'<sub>psi</sub>] (TE = -3313.522070)

|    |              |              |              |
|----|--------------|--------------|--------------|
| 6  | -0.165477000 | 2.761594000  | 1.797130000  |
| 6  | 0.401971000  | 1.702749000  | 2.740694000  |
| 6  | -2.806620000 | -0.202041000 | 1.879369000  |
| 6  | -1.675740000 | -0.600442000 | 2.827329000  |
| 6  | 2.569340000  | -1.264050000 | 1.816222000  |
| 6  | 1.386237000  | -1.224314000 | 2.785621000  |
| 1  | -2.943880000 | 0.889350000  | 1.882204000  |
| 1  | -1.865522000 | -0.194651000 | 3.830809000  |
| 1  | 3.280181000  | -2.074700000 | 2.033750000  |
| 1  | 1.738639000  | -0.927209000 | 3.783436000  |
| 1  | 0.118415000  | 3.785511000  | 2.072629000  |
| 1  | 1.494450000  | 1.820731000  | 2.805885000  |
| 6  | -0.493465000 | 3.767349000  | -0.942863000 |
| 1  | 0.216435000  | 3.967304000  | -1.758311000 |
| 6  | -2.695709000 | -2.498118000 | 0.124381000  |
| 1  | -2.069733000 | -2.806501000 | 0.976629000  |
| 6  | 3.629875000  | -0.719638000 | -0.811828000 |
| 1  | 3.559438000  | 0.359014000  | -0.609176000 |
| 23 | -0.042442000 | -0.044931000 | -0.470430000 |
| 1  | -1.265099000 | 2.740249000  | 1.815139000  |
| 1  | 0.030309000  | 1.868458000  | 3.761972000  |
| 1  | 0.965072000  | -2.228862000 | 2.909043000  |
| 1  | 3.149858000  | -0.334037000 | 1.907479000  |
| 1  | -1.672294000 | -1.693399000 | 2.950737000  |

|   |              |              |              |
|---|--------------|--------------|--------------|
| 1 | -3.777299000 | -0.626135000 | 2.170053000  |
| 6 | 4.976917000  | -1.176594000 | -0.259971000 |
| 1 | 5.779638000  | -0.571648000 | -0.698443000 |
| 1 | 5.050706000  | -1.062952000 | 0.824622000  |
| 1 | 5.205476000  | -2.216908000 | -0.496786000 |
| 6 | 3.542404000  | -0.900759000 | -2.321331000 |
| 1 | 3.601294000  | -1.955251000 | -2.612077000 |
| 1 | 2.608255000  | -0.504998000 | -2.729803000 |
| 1 | 4.367072000  | -0.385270000 | -2.826428000 |
| 6 | -4.117002000 | -2.969084000 | 0.399028000  |
| 1 | -4.132896000 | -4.049918000 | 0.582067000  |
| 1 | -4.567007000 | -2.488383000 | 1.272552000  |
| 1 | -4.774910000 | -2.787514000 | -0.456753000 |
| 6 | -2.126668000 | -3.167100000 | -1.121882000 |
| 1 | -2.702628000 | -2.921225000 | -2.019253000 |
| 1 | -1.091598000 | -2.865683000 | -1.308926000 |
| 1 | -2.144121000 | -4.258107000 | -1.017296000 |
| 6 | -1.796539000 | 3.280604000  | -1.563822000 |
| 1 | -1.666379000 | 2.359434000  | -2.141389000 |
| 1 | -2.542006000 | 3.074991000  | -0.785888000 |
| 1 | -2.227914000 | 4.040485000  | -2.225354000 |
| 6 | -0.736751000 | 5.062268000  | -0.175164000 |
| 1 | 0.157489000  | 5.455561000  | 0.312271000  |
| 1 | -1.111943000 | 5.842051000  | -0.848070000 |
| 1 | -1.495217000 | 4.925505000  | 0.602659000  |
| 6 | 1.919036000  | -3.152564000 | -0.364162000 |
| 1 | 1.461341000  | -3.160482000 | -1.365716000 |
| 6 | 0.942472000  | -3.803244000 | 0.611337000  |
| 1 | 1.416721000  | -3.968385000 | 1.584823000  |
| 1 | 0.049629000  | -3.193307000 | 0.779186000  |
| 1 | 0.616966000  | -4.781896000 | 0.241843000  |
| 6 | 3.207933000  | -3.960988000 | -0.414603000 |
| 1 | 2.982137000  | -5.024407000 | -0.558718000 |
| 1 | 3.866833000  | -3.662443000 | -1.232154000 |
| 1 | 3.777029000  | -3.882745000 | 0.518527000  |
| 6 | -3.819897000 | 0.157581000  | -0.811753000 |
| 1 | -3.472858000 | 1.199244000  | -0.849853000 |
| 6 | -5.195366000 | 0.172860000  | -0.154038000 |
| 1 | -5.648595000 | -0.818930000 | -0.095157000 |
| 1 | -5.175068000 | 0.586418000  | 0.857364000  |
| 1 | -5.879848000 | 0.798245000  | -0.739723000 |
| 6 | -3.892669000 | -0.343593000 | -2.248308000 |
| 1 | -4.305884000 | -1.356479000 | -2.302789000 |
| 1 | -4.547127000 | 0.295980000  | -2.851009000 |
| 1 | -2.912334000 | -0.361204000 | -2.734029000 |
| 6 | 2.135382000  | 2.820171000  | -0.006702000 |

|    |              |              |              |
|----|--------------|--------------|--------------|
| 1  | 2.580606000  | 2.005898000  | 0.587144000  |
| 6  | 2.560985000  | 4.143877000  | 0.611251000  |
| 1  | 3.654339000  | 4.211070000  | 0.656166000  |
| 1  | 2.221999000  | 4.996886000  | 0.015035000  |
| 1  | 2.190362000  | 4.279330000  | 1.631164000  |
| 6  | 2.654203000  | 2.697934000  | -1.435979000 |
| 1  | 3.749976000  | 2.691725000  | -1.461012000 |
| 1  | 2.303768000  | 1.784357000  | -1.928653000 |
| 1  | 2.332562000  | 3.544553000  | -2.052230000 |
| 15 | -2.404624000 | -0.643836000 | 0.123935000  |
| 15 | 0.310385000  | 2.385386000  | 0.046271000  |
| 15 | 2.061875000  | -1.320483000 | 0.026328000  |
| 14 | 0.020037000  | -0.073816000 | 2.092016000  |
| 7  | -0.147028000 | -0.715161000 | -3.540943000 |
| 7  | -0.107660000 | -0.444073000 | -2.435670000 |

[2c'<sub>PB</sub>] (TE = -3048.877617)

|    |              |              |              |
|----|--------------|--------------|--------------|
| 6  | 0.043551000  | 2.457295000  | 2.097692000  |
| 6  | 0.602625000  | 1.242386000  | 2.836579000  |
| 6  | -2.637629000 | 0.127661000  | 1.860026000  |
| 6  | -1.573112000 | -0.435370000 | 2.803872000  |
| 6  | 2.269842000  | -1.380611000 | 1.832457000  |
| 6  | 0.942959000  | -1.454681000 | 2.583296000  |
| 1  | -2.581342000 | 1.221742000  | 1.800045000  |
| 1  | -1.768007000 | -0.025623000 | 3.810490000  |
| 1  | 2.978006000  | -2.158867000 | 2.140095000  |
| 1  | 1.163287000  | -1.591012000 | 3.659481000  |
| 1  | 0.395476000  | 3.415478000  | 2.503596000  |
| 1  | 1.700002000  | 1.248123000  | 2.748666000  |
| 6  | -0.351910000 | 3.774713000  | -0.525145000 |
| 1  | 0.349462000  | 4.619182000  | -0.453431000 |
| 6  | -2.769267000 | -2.303154000 | 0.281641000  |
| 1  | -1.841311000 | -2.686498000 | 0.734047000  |
| 6  | 3.647981000  | -0.863559000 | -0.659776000 |
| 1  | 3.751813000  | 0.155336000  | -0.255991000 |
| 23 | -0.002807000 | -0.000054000 | -0.502804000 |
| 1  | -1.047777000 | 2.479943000  | 2.177654000  |
| 1  | 0.418919000  | 1.386628000  | 3.916738000  |
| 1  | 0.413283000  | -2.378154000 | 2.297912000  |
| 1  | 2.771370000  | -0.422478000 | 2.029985000  |
| 1  | -1.754695000 | -1.516643000 | 2.909748000  |
| 1  | -3.658017000 | -0.103443000 | 2.197125000  |
| 6  | 4.832967000  | -1.693802000 | -0.185594000 |
| 1  | 5.776639000  | -1.257155000 | -0.532399000 |
| 1  | 4.890885000  | -1.765514000 | 0.904393000  |
| 1  | 4.795831000  | -2.713670000 | -0.583998000 |

|   |              |              |              |
|---|--------------|--------------|--------------|
| 6 | 3.613969000  | -0.766516000 | -2.178981000 |
| 1 | 3.494315000  | -1.750840000 | -2.646965000 |
| 1 | 2.792511000  | -0.139151000 | -2.534012000 |
| 1 | 4.547878000  | -0.344791000 | -2.566860000 |
| 6 | -3.918110000 | -2.708306000 | 1.196458000  |
| 1 | -3.953581000 | -3.800216000 | 1.289304000  |
| 1 | -3.811211000 | -2.308061000 | 2.208107000  |
| 1 | -4.892410000 | -2.392358000 | 0.816981000  |
| 6 | -2.902573000 | -2.929991000 | -1.100665000 |
| 1 | -3.858857000 | -2.670137000 | -1.567466000 |
| 1 | -2.105277000 | -2.608640000 | -1.779786000 |
| 1 | -2.864274000 | -4.023536000 | -1.042446000 |
| 6 | -0.606772000 | 3.466326000  | -1.997166000 |
| 1 | 0.288749000  | 3.130196000  | -2.527517000 |
| 1 | -1.351224000 | 2.667035000  | -2.097158000 |
| 1 | -0.994126000 | 4.347509000  | -2.521033000 |
| 6 | -1.653841000 | 4.167035000  | 0.160027000  |
| 1 | -1.505472000 | 4.533899000  | 1.178763000  |
| 1 | -2.164707000 | 4.955654000  | -0.403216000 |
| 1 | -2.345575000 | 3.315768000  | 0.212658000  |
| 6 | 1.988045000  | -3.245091000 | -0.478598000 |
| 1 | 2.693742000  | -3.299023000 | -1.320692000 |
| 6 | 0.621310000  | -3.670912000 | -0.995257000 |
| 1 | -0.135727000 | -3.617664000 | -0.204889000 |
| 1 | 0.272904000  | -3.030776000 | -1.811150000 |
| 1 | 0.642699000  | -4.704312000 | -1.360934000 |
| 6 | 2.475684000  | -4.193171000 | 0.608348000  |
| 1 | 2.476203000  | -5.226151000 | 0.241835000  |
| 1 | 3.490697000  | -3.969778000 | 0.946976000  |
| 1 | 1.824310000  | -4.167757000 | 1.488768000  |
| 6 | -3.722043000 | 0.375554000  | -0.802607000 |
| 1 | -3.566166000 | 1.420854000  | -0.487338000 |
| 6 | -5.147376000 | -0.017042000 | -0.437788000 |
| 1 | -5.399354000 | -1.011656000 | -0.819428000 |
| 1 | -5.329068000 | -0.019207000 | 0.640668000  |
| 1 | -5.863871000 | 0.680541000  | -0.886856000 |
| 6 | -3.507028000 | 0.323609000  | -2.310494000 |
| 1 | -3.610297000 | -0.691042000 | -2.707393000 |
| 1 | -4.246958000 | 0.945363000  | -2.827085000 |
| 1 | -2.515541000 | 0.682406000  | -2.595928000 |
| 6 | 2.276155000  | 2.748840000  | 0.284937000  |
| 1 | 2.747791000  | 1.868110000  | 0.747285000  |
| 6 | 2.660677000  | 3.977191000  | 1.096289000  |
| 1 | 3.730611000  | 4.190057000  | 0.990551000  |
| 1 | 2.127767000  | 4.875529000  | 0.764233000  |
| 1 | 2.463021000  | 3.853499000  | 2.164020000  |

|    |              |              |              |
|----|--------------|--------------|--------------|
| 6  | 2.776134000  | 2.849322000  | -1.150319000 |
| 1  | 3.870460000  | 2.896695000  | -1.185131000 |
| 1  | 2.461747000  | 1.991610000  | -1.755187000 |
| 1  | 2.403964000  | 3.755136000  | -1.642433000 |
| 15 | -2.353336000 | -0.480168000 | 0.145724000  |
| 15 | 0.455009000  | 2.300196000  | 0.306423000  |
| 15 | 1.989878000  | -1.417183000 | 0.007235000  |
| 5  | -0.021819000 | -0.186645000 | 2.458158000  |
| 7  | 0.043226000  | -0.224316000 | -3.633516000 |
| 7  | 0.022127000  | -0.123786000 | -2.500173000 |

**[2d'<sub>sc</sub>]-Quintet (TE = -2877.257312)**

|    |              |              |              |
|----|--------------|--------------|--------------|
| 6  | -0.762178000 | 2.024044000  | -1.787742000 |
| 6  | -0.700964000 | 0.636564000  | -2.405386000 |
| 6  | 2.561013000  | 0.859351000  | -1.292390000 |
| 6  | 1.721734000  | -0.015484000 | -2.209859000 |
| 6  | -1.378426000 | -2.284928000 | -1.693871000 |
| 6  | -0.040304000 | -1.758822000 | -2.176992000 |
| 1  | 2.168261000  | 1.877970000  | -1.211891000 |
| 1  | 1.731743000  | 0.459040000  | -3.210849000 |
| 1  | -1.518365000 | -3.342766000 | -1.936026000 |
| 1  | -0.030013000 | -1.881960000 | -3.281800000 |
| 1  | -1.449404000 | 2.687298000  | -2.323795000 |
| 1  | -1.721133000 | 0.225904000  | -2.366069000 |
| 6  | -0.843864000 | 3.395893000  | 0.759065000  |
| 1  | -1.332512000 | 3.295239000  | 1.736557000  |
| 6  | 3.375940000  | -1.390550000 | 0.268341000  |
| 1  | 2.829566000  | -1.911182000 | -0.527724000 |
| 6  | -3.286596000 | -1.419663000 | 0.218290000  |
| 1  | -3.311205000 | -0.578183000 | -0.488645000 |
| 23 | 0.087570000  | -0.217755000 | 0.511662000  |
| 16 | 2.542490000  | 0.265428000  | 0.438627000  |
| 16 | -1.352290000 | 1.815110000  | -0.065151000 |
| 16 | -1.540380000 | -2.071099000 | 0.129400000  |
| 6  | 0.289372000  | -0.327067000 | -1.739096000 |
| 1  | 0.221873000  | 2.505632000  | -1.764968000 |
| 1  | -0.489541000 | 0.762861000  | -3.486963000 |
| 1  | 0.746646000  | -2.434375000 | -1.809199000 |
| 1  | -2.216324000 | -1.739604000 | -2.140392000 |
| 1  | 2.272198000  | -0.956157000 | -2.356601000 |
| 1  | 3.600456000  | 0.952677000  | -1.628852000 |
| 6  | -4.275619000 | -2.490224000 | -0.194539000 |
| 1  | -5.297752000 | -2.095138000 | -0.179996000 |
| 1  | -4.086287000 | -2.866465000 | -1.203719000 |
| 1  | -4.240410000 | -3.343608000 | 0.490084000  |
| 6  | -3.527704000 | -0.910936000 | 1.624147000  |



|   |              |              |              |
|---|--------------|--------------|--------------|
| 1 | -3.409676000 | -1.708962000 | 2.365132000  |
| 1 | -2.838972000 | -0.104174000 | 1.889195000  |
| 1 | -4.548062000 | -0.525386000 | 1.718184000  |
| 6 | 4.835435000  | -1.230385000 | -0.103216000 |
| 1 | 5.312324000  | -2.211153000 | -0.208082000 |
| 1 | 4.970218000  | -0.704775000 | -1.052590000 |
| 1 | 5.383447000  | -0.677131000 | 0.666030000  |
| 6 | 3.173254000  | -2.135033000 | 1.572747000  |
| 1 | 3.605333000  | -1.593868000 | 2.421601000  |
| 1 | 2.109381000  | -2.292865000 | 1.777903000  |
| 1 | 3.657145000  | -3.115848000 | 1.527379000  |
| 6 | 0.653968000  | 3.499976000  | 0.960318000  |
| 1 | 1.051452000  | 2.651705000  | 1.523856000  |
| 1 | 1.188610000  | 3.549611000  | 0.005263000  |
| 1 | 0.900974000  | 4.415434000  | 1.509118000  |
| 6 | -1.422967000 | 4.590906000  | 0.025829000  |
| 1 | -2.502165000 | 4.500555000  | -0.120543000 |
| 1 | -1.235570000 | 5.511846000  | 0.588037000  |
| 1 | -0.960408000 | 4.717776000  | -0.958362000 |
| 7 | 0.058015000  | -0.432146000 | 3.657417000  |
| 7 | 0.055465000  | -0.344203000 | 2.524097000  |

[2e'<sub>ssi</sub>] (TE = -3128.668457)

|    |              |              |              |
|----|--------------|--------------|--------------|
| 23 | -0.020789000 | -0.010976000 | 0.816867000  |
| 16 | -1.962810000 | -1.647548000 | 0.946759000  |
| 16 | 2.202692000  | -1.197089000 | 1.228960000  |
| 16 | 0.530859000  | 1.856396000  | -0.759650000 |
| 14 | 0.279542000  | -1.172565000 | -1.425555000 |
| 6  | 0.416473000  | 0.096874000  | -2.862173000 |
| 6  | -0.195984000 | 1.412442000  | -2.399715000 |
| 6  | 2.222086000  | -2.626440000 | 0.063039000  |
| 6  | 1.854983000  | -2.278990000 | -1.373847000 |
| 6  | -1.237312000 | -2.316553000 | -1.705662000 |
| 6  | -1.687474000 | -2.899342000 | -0.375936000 |
| 1  | -0.919284000 | -3.551675000 | 0.055266000  |
| 1  | -2.599282000 | -3.504412000 | -0.435321000 |
| 1  | -2.055124000 | -1.731295000 | -2.150602000 |
| 1  | -1.047196000 | -3.142607000 | -2.406410000 |
| 1  | 3.198930000  | -3.113984000 | 0.164078000  |
| 1  | 1.491434000  | -3.309693000 | 0.510260000  |
| 1  | 2.691592000  | -1.745814000 | -1.846587000 |
| 1  | 1.750532000  | -3.215817000 | -1.939541000 |
| 1  | 1.472917000  | 0.257464000  | -3.116924000 |
| 1  | -0.077635000 | -0.215952000 | -3.791469000 |
| 1  | -1.279669000 | 1.313805000  | -2.262257000 |
| 1  | -0.011157000 | 2.246951000  | -3.086810000 |

|   |              |              |              |
|---|--------------|--------------|--------------|
| 6 | -3.393098000 | -0.679184000 | 0.240139000  |
| 1 | -2.966442000 | -0.086898000 | -0.582036000 |
| 6 | 3.444743000  | -0.073912000 | 0.425034000  |
| 1 | 3.002055000  | 0.212492000  | -0.539275000 |
| 6 | -0.348417000 | 3.440686000  | -0.354356000 |
| 1 | 0.034158000  | 3.637154000  | 0.655646000  |
| 6 | 4.774792000  | -0.765738000 | 0.208948000  |
| 1 | 5.497289000  | -0.064749000 | -0.223425000 |
| 1 | 5.193635000  | -1.131211000 | 1.152103000  |
| 1 | 4.701578000  | -1.613475000 | -0.477096000 |
| 6 | 3.570940000  | 1.157730000  | 1.300985000  |
| 1 | 2.602955000  | 1.639260000  | 1.471480000  |
| 1 | 3.999550000  | 0.910642000  | 2.277718000  |
| 1 | 4.227307000  | 1.893548000  | 0.825821000  |
| 6 | 0.074757000  | 4.565228000  | -1.280122000 |
| 1 | -0.272133000 | 4.397691000  | -2.304674000 |
| 1 | -0.359053000 | 5.515350000  | -0.949453000 |
| 1 | 1.160270000  | 4.685424000  | -1.309845000 |
| 6 | -1.852353000 | 3.262791000  | -0.289858000 |
| 1 | -2.325840000 | 4.158916000  | 0.125553000  |
| 1 | -2.284473000 | 3.104405000  | -1.283562000 |
| 1 | -2.129045000 | 2.410813000  | 0.337845000  |
| 6 | -3.874788000 | 0.250086000  | 1.337719000  |
| 1 | -4.635730000 | 0.934327000  | 0.948393000  |
| 1 | -4.323547000 | -0.311494000 | 2.163225000  |
| 1 | -3.063441000 | 0.855974000  | 1.749827000  |
| 6 | -4.500644000 | -1.576646000 | -0.271575000 |
| 1 | -5.356492000 | -0.969048000 | -0.585311000 |
| 1 | -4.198257000 | -2.173297000 | -1.135536000 |
| 1 | -4.853504000 | -2.261222000 | 0.506791000  |
| 7 | -0.664828000 | 1.827135000  | 3.289233000  |
| 7 | -0.427518000 | 1.120645000  | 2.427788000  |

[2f<sub>SB</sub>] (TE = -2864.018742)

|   |              |              |              |
|---|--------------|--------------|--------------|
| 6 | -0.906331000 | 1.979101000  | -1.870671000 |
| 6 | -0.752788000 | 0.612074000  | -2.519237000 |
| 6 | 2.598438000  | 1.091562000  | -1.170920000 |
| 6 | 1.953945000  | 0.222190000  | -2.238890000 |
| 6 | -1.063593000 | -2.474457000 | -1.674348000 |
| 6 | 0.259829000  | -1.903565000 | -2.142676000 |
| 1 | 2.083261000  | 2.051578000  | -1.059982000 |
| 1 | 1.982611000  | 0.812996000  | -3.171442000 |
| 1 | -1.152073000 | -3.555409000 | -1.825116000 |
| 1 | 0.362950000  | -2.172731000 | -3.212064000 |
| 1 | -1.642680000 | 2.615703000  | -2.373954000 |
| 1 | -1.729670000 | 0.105974000  | -2.472302000 |

|    |              |              |              |
|----|--------------|--------------|--------------|
| 6  | -1.131407000 | 3.341112000  | 0.677578000  |
| 1  | -1.580175000 | 3.178913000  | 1.666116000  |
| 6  | 3.376511000  | -1.236855000 | 0.287814000  |
| 1  | 2.861675000  | -1.729157000 | -0.545827000 |
| 6  | -3.132618000 | -1.696156000 | 0.110926000  |
| 1  | -3.224516000 | -0.893948000 | -0.634973000 |
| 23 | 0.068304000  | -0.134364000 | 0.631298000  |
| 16 | 2.493283000  | 0.384778000  | 0.520362000  |
| 16 | -1.472295000 | 1.713968000  | -0.143144000 |
| 16 | -1.323032000 | -2.139783000 | 0.123593000  |
| 1  | 0.045840000  | 2.522587000  | -1.841352000 |
| 1  | -0.591999000 | 0.789446000  | -3.598574000 |
| 1  | 1.079537000  | -2.451243000 | -1.652647000 |
| 1  | -1.906767000 | -2.003706000 | -2.191699000 |
| 1  | 2.627597000  | -0.625413000 | -2.439169000 |
| 1  | 3.650557000  | 1.327096000  | -1.373573000 |
| 6  | -3.970274000 | -2.892488000 | -0.292509000 |
| 1  | -5.031132000 | -2.620722000 | -0.332230000 |
| 1  | -3.697193000 | -3.281052000 | -1.277259000 |
| 1  | -3.864219000 | -3.709046000 | 0.428733000  |
| 6  | -3.498182000 | -1.164682000 | 1.481301000  |
| 1  | -3.326939000 | -1.915301000 | 2.260409000  |
| 1  | -2.919531000 | -0.274281000 | 1.741890000  |
| 1  | -4.558936000 | -0.895737000 | 1.512481000  |
| 6  | 4.836634000  | -1.016615000 | -0.048307000 |
| 1  | 5.345273000  | -1.977582000 | -0.182754000 |
| 1  | 4.970931000  | -0.449676000 | -0.973584000 |
| 1  | 5.353549000  | -0.478673000 | 0.752722000  |
| 6  | 3.173431000  | -2.050877000 | 1.549599000  |
| 1  | 3.594264000  | -1.549644000 | 2.427995000  |
| 1  | 2.110337000  | -2.231646000 | 1.741520000  |
| 1  | 3.668280000  | -3.022812000 | 1.456583000  |
| 6  | 0.347981000  | 3.621447000  | 0.842951000  |
| 1  | 0.859476000  | 2.814851000  | 1.376004000  |
| 1  | 0.844435000  | 3.757614000  | -0.124028000 |
| 1  | 0.497931000  | 4.547397000  | 1.408798000  |
| 6  | -1.864621000 | 4.462578000  | -0.033646000 |
| 1  | -2.928709000 | 4.246211000  | -0.156275000 |
| 1  | -1.774082000 | 5.396226000  | 0.531454000  |
| 1  | -1.442967000 | 4.648218000  | -1.026704000 |
| 5  | 0.450529000  | -0.317212000 | -1.993008000 |
| 7  | -0.088853000 | -0.235840000 | 3.769994000  |
| 7  | -0.042514000 | -0.194190000 | 2.635607000  |

[2a''<sub>pc</sub>] (TE = -3519.383039)

|   |             |              |             |
|---|-------------|--------------|-------------|
| 6 | 1.180147000 | -0.669751000 | 1.748461000 |
|---|-------------|--------------|-------------|

|    |              |              |              |
|----|--------------|--------------|--------------|
| 6  | 1.781388000  | -0.156911000 | 2.909192000  |
| 1  | 1.310888000  | 0.684131000  | 3.415564000  |
| 6  | 2.954385000  | -0.690034000 | 3.432940000  |
| 1  | 3.391069000  | -0.255290000 | 4.330532000  |
| 6  | 3.558355000  | -1.781890000 | 2.820704000  |
| 1  | 4.472990000  | -2.210414000 | 3.224482000  |
| 6  | 2.987770000  | -2.309466000 | 1.665950000  |
| 1  | 3.485569000  | -3.139465000 | 1.167518000  |
| 6  | 1.827745000  | -1.761593000 | 1.108290000  |
| 6  | -0.358720000 | 1.312851000  | 1.691009000  |
| 6  | -1.248895000 | 1.595351000  | 2.740963000  |
| 1  | -1.764035000 | 0.773172000  | 3.233194000  |
| 6  | -1.506817000 | 2.894520000  | 3.162748000  |
| 1  | -2.214289000 | 3.068846000  | 3.971632000  |
| 6  | -0.861790000 | 3.964266000  | 2.553881000  |
| 1  | -1.057946000 | 4.986322000  | 2.870540000  |
| 6  | 0.036281000  | 3.711817000  | 1.522125000  |
| 1  | 0.525443000  | 4.553669000  | 1.040620000  |
| 6  | 0.287149000  | 2.410622000  | 1.075286000  |
| 6  | -1.305474000 | -0.949510000 | 1.554928000  |
| 6  | -1.334889000 | -1.785684000 | 2.678424000  |
| 1  | -0.432034000 | -1.892549000 | 3.278336000  |
| 6  | -2.484915000 | -2.475260000 | 3.047613000  |
| 1  | -2.469719000 | -3.122393000 | 3.923025000  |
| 6  | -3.654546000 | -2.327743000 | 2.310677000  |
| 1  | -4.560190000 | -2.858292000 | 2.596193000  |
| 6  | -3.655217000 | -1.491869000 | 1.196975000  |
| 1  | -4.571385000 | -1.379123000 | 0.622611000  |
| 6  | -2.498023000 | -0.817596000 | 0.799624000  |
| 6  | -0.108039000 | -0.100192000 | 1.213338000  |
| 23 | 0.095309000  | -0.071962000 | -1.109328000 |
| 6  | 2.838260000  | -2.571239000 | -1.504913000 |
| 1  | 3.423508000  | -3.290402000 | -0.917455000 |
| 6  | 1.044235000  | 3.588585000  | -1.484152000 |
| 1  | -0.000078000 | 3.858920000  | -1.261081000 |
| 6  | -3.437578000 | -0.633453000 | -2.051518000 |
| 1  | -3.082128000 | -0.114398000 | -2.955965000 |
| 6  | -4.948520000 | -0.439706000 | -1.987992000 |
| 1  | -5.417127000 | -0.902659000 | -2.864410000 |
| 1  | -5.401319000 | -0.907321000 | -1.109806000 |
| 1  | -5.244539000 | 0.610654000  | -1.989618000 |
| 6  | -3.084051000 | -2.109112000 | -2.206675000 |
| 1  | -3.421969000 | -2.694145000 | -1.344417000 |
| 1  | -3.568348000 | -2.528819000 | -3.094830000 |
| 1  | -2.005253000 | -2.268196000 | -2.306541000 |
| 6  | 2.532922000  | -3.187599000 | -2.865630000 |

|    |              |              |              |
|----|--------------|--------------|--------------|
| 1  | 2.081746000  | -4.180681000 | -2.794782000 |
| 1  | 1.852528000  | -2.557020000 | -3.448810000 |
| 1  | 3.451459000  | -3.293239000 | -3.453055000 |
| 6  | 3.657665000  | -1.303048000 | -1.665114000 |
| 1  | 3.858349000  | -0.813675000 | -0.707222000 |
| 1  | 4.622447000  | -1.516582000 | -2.139231000 |
| 1  | 3.131242000  | -0.580105000 | -2.297744000 |
| 6  | 1.918233000  | 4.809084000  | -1.209267000 |
| 1  | 1.564466000  | 5.658908000  | -1.804466000 |
| 1  | 1.921917000  | 5.129900000  | -0.166500000 |
| 1  | 2.958582000  | 4.641127000  | -1.497970000 |
| 6  | 1.117877000  | 3.216182000  | -2.962382000 |
| 1  | 2.108137000  | 2.837503000  | -3.239810000 |
| 1  | 0.390214000  | 2.445125000  | -3.225702000 |
| 1  | 0.920859000  | 4.090809000  | -3.592516000 |
| 15 | -2.339820000 | 0.144380000  | -0.746792000 |
| 15 | 1.258671000  | 2.044183000  | -0.431293000 |
| 15 | 1.250587000  | -2.215292000 | -0.573048000 |
| 6  | 3.045645000  | 1.962668000  | 0.148351000  |
| 1  | 3.083490000  | 0.939298000  | 0.550764000  |
| 6  | 4.024397000  | 2.039336000  | -1.018647000 |
| 1  | 4.172453000  | 3.066364000  | -1.361747000 |
| 1  | 5.008703000  | 1.661415000  | -0.720718000 |
| 1  | 3.701180000  | 1.449721000  | -1.880072000 |
| 6  | 3.430760000  | 2.908416000  | 1.276479000  |
| 1  | 4.441147000  | 2.677022000  | 1.634078000  |
| 1  | 3.437164000  | 3.955383000  | 0.959234000  |
| 1  | 2.755636000  | 2.824800000  | 2.132209000  |
| 6  | 0.519665000  | -3.946601000 | -0.520734000 |
| 1  | 0.273208000  | -4.127424000 | -1.577965000 |
| 6  | -0.770303000 | -4.015361000 | 0.277665000  |
| 1  | -0.575357000 | -3.922930000 | 1.349200000  |
| 1  | -1.478644000 | -3.228330000 | 0.009050000  |
| 1  | -1.263802000 | -4.981070000 | 0.119970000  |
| 6  | 1.484427000  | -5.025352000 | -0.046037000 |
| 1  | 0.996455000  | -6.006554000 | -0.066937000 |
| 1  | 2.387713000  | -5.106096000 | -0.656054000 |
| 1  | 1.794474000  | -4.849522000 | 0.989737000  |
| 6  | -3.035939000 | 1.848365000  | -0.409843000 |
| 1  | -2.229114000 | 2.302848000  | 0.179091000  |
| 6  | -4.298183000 | 1.913462000  | 0.437852000  |
| 1  | -4.530930000 | 2.954657000  | 0.690491000  |
| 1  | -5.176574000 | 1.501047000  | -0.065406000 |
| 1  | -4.174987000 | 1.373343000  | 1.381125000  |
| 6  | -3.131681000 | 2.635006000  | -1.711988000 |
| 1  | -3.327592000 | 3.693935000  | -1.511087000 |

|   |              |              |              |
|---|--------------|--------------|--------------|
| 1 | -2.198409000 | 2.578269000  | -2.286148000 |
| 1 | -3.936838000 | 2.279745000  | -2.363052000 |
| 7 | 0.027943000  | -0.289469000 | -4.246932000 |
| 7 | 0.089707000  | -0.193894000 | -3.118499000 |

[2b''<sub>psi</sub>] (TE =-3770.793091)

|    |              |              |              |
|----|--------------|--------------|--------------|
| 6  | 0.811840000  | -1.678102000 | 1.939382000  |
| 6  | 0.575797000  | -2.270618000 | 3.186437000  |
| 1  | -0.140558000 | -1.813076000 | 3.870554000  |
| 6  | 1.210459000  | -3.449862000 | 3.564046000  |
| 1  | 1.002069000  | -3.899536000 | 4.533298000  |
| 6  | 2.106818000  | -4.058903000 | 2.691102000  |
| 1  | 2.604930000  | -4.984119000 | 2.974208000  |
| 6  | 2.358253000  | -3.489585000 | 1.446528000  |
| 1  | 3.052600000  | -3.988276000 | 0.774171000  |
| 6  | 1.712838000  | -2.311058000 | 1.058587000  |
| 6  | 0.757735000  | 1.372777000  | 2.137231000  |
| 6  | 1.210878000  | 1.377784000  | 3.461969000  |
| 1  | 1.051445000  | 0.496398000  | 4.085343000  |
| 6  | 1.898275000  | 2.463860000  | 3.994502000  |
| 1  | 2.255095000  | 2.438070000  | 5.022665000  |
| 6  | 2.140765000  | 3.578680000  | 3.198857000  |
| 1  | 2.686775000  | 4.430563000  | 3.599489000  |
| 6  | 1.694282000  | 3.601473000  | 1.880903000  |
| 1  | 1.909068000  | 4.477701000  | 1.275718000  |
| 6  | 1.010102000  | 2.508499000  | 1.338424000  |
| 6  | -1.873546000 | -0.154559000 | 1.863231000  |
| 6  | -2.295467000 | 0.194656000  | 3.152442000  |
| 1  | -1.549650000 | 0.406272000  | 3.920253000  |
| 6  | -3.643093000 | 0.330334000  | 3.467992000  |
| 1  | -3.946020000 | 0.620015000  | 4.472680000  |
| 6  | -4.602967000 | 0.116296000  | 2.483582000  |
| 1  | -5.659994000 | 0.237451000  | 2.712212000  |
| 6  | -4.210706000 | -0.245888000 | 1.199444000  |
| 1  | -4.977061000 | -0.400650000 | 0.445255000  |
| 6  | -2.856099000 | -0.385821000 | 0.877015000  |
| 23 | 0.102441000  | 0.068233000  | -1.208505000 |
| 6  | 3.674402000  | -0.804965000 | -0.435785000 |
| 1  | 4.354191000  | -1.645653000 | -0.240962000 |
| 6  | -1.058493000 | 3.569912000  | -0.381233000 |
| 1  | -0.692958000 | 4.559358000  | -0.074055000 |
| 6  | -2.524890000 | -2.676424000 | -0.910145000 |
| 1  | -2.719862000 | -2.857828000 | -1.978917000 |
| 6  | -3.689334000 | -3.210266000 | -0.085394000 |
| 1  | -3.824093000 | -4.281647000 | -0.274347000 |
| 1  | -3.492116000 | -3.094103000 | 0.985120000  |

|    |              |              |              |
|----|--------------|--------------|--------------|
| 1  | -4.642081000 | -2.722424000 | -0.291987000 |
| 6  | -1.255891000 | -3.421332000 | -0.525107000 |
| 1  | -0.985942000 | -3.241977000 | 0.521601000  |
| 1  | -1.390898000 | -4.502646000 | -0.644087000 |
| 1  | -0.404397000 | -3.118413000 | -1.136561000 |
| 6  | 4.076604000  | -0.113101000 | -1.731150000 |
| 1  | 3.958157000  | -0.742337000 | -2.618747000 |
| 1  | 3.464179000  | 0.780869000  | -1.889574000 |
| 1  | 5.122717000  | 0.211068000  | -1.695810000 |
| 6  | 3.758371000  | 0.164551000  | 0.732774000  |
| 1  | 3.469132000  | -0.290968000 | 1.684541000  |
| 1  | 4.781186000  | 0.542475000  | 0.842196000  |
| 1  | 3.107111000  | 1.030554000  | 0.577102000  |
| 6  | -1.681547000 | 3.666421000  | -1.766945000 |
| 1  | -2.536816000 | 4.351663000  | -1.765177000 |
| 1  | -0.984730000 | 4.016996000  | -2.533716000 |
| 1  | -2.049645000 | 2.685596000  | -2.090491000 |
| 6  | -2.090137000 | 3.101862000  | 0.631601000  |
| 1  | -2.516940000 | 2.136489000  | 0.344983000  |
| 1  | -1.677843000 | 2.988276000  | 1.638634000  |
| 1  | -2.917841000 | 3.817748000  | 0.690603000  |
| 14 | -0.060796000 | -0.120163000 | 1.282724000  |
| 15 | 0.448648000  | 2.447256000  | -0.424297000 |
| 15 | -2.262411000 | -0.805078000 | -0.822505000 |
| 15 | 1.958406000  | -1.545873000 | -0.606277000 |
| 6  | 2.268584000  | -3.062939000 | -1.707886000 |
| 1  | 1.682152000  | -3.847308000 | -1.208262000 |
| 6  | 3.706565000  | -3.558405000 | -1.823475000 |
| 1  | 3.731686000  | -4.494855000 | -2.392213000 |
| 1  | 4.344548000  | -2.850216000 | -2.360368000 |
| 1  | 4.185793000  | -3.756784000 | -0.862135000 |
| 6  | 1.679943000  | -2.851360000 | -3.097618000 |
| 1  | 0.623555000  | -2.565851000 | -3.063476000 |
| 1  | 2.204670000  | -2.061454000 | -3.645630000 |
| 1  | 1.760224000  | -3.766449000 | -3.695148000 |
| 6  | -3.595654000 | -0.131960000 | -1.985281000 |
| 1  | -3.857210000 | 0.838278000  | -1.533532000 |
| 6  | -2.963818000 | 0.129106000  | -3.349645000 |
| 1  | -2.577585000 | -0.794506000 | -3.798719000 |
| 1  | -3.702782000 | 0.540048000  | -4.046217000 |
| 1  | -2.129100000 | 0.829666000  | -3.295184000 |
| 6  | -4.874556000 | -0.939133000 | -2.187454000 |
| 1  | -4.668170000 | -1.934308000 | -2.594390000 |
| 1  | -5.470770000 | -1.073132000 | -1.284355000 |
| 1  | -5.517175000 | -0.432092000 | -2.916142000 |
| 6  | 1.719050000  | 3.529440000  | -1.323552000 |

|                                           |              |              |              |
|-------------------------------------------|--------------|--------------|--------------|
| 1                                         | 2.653559000  | 3.297682000  | -0.788716000 |
| 6                                         | 1.501084000  | 5.040087000  | -1.287797000 |
| 1                                         | 2.371057000  | 5.550958000  | -1.715574000 |
| 1                                         | 0.638198000  | 5.336393000  | -1.892210000 |
| 1                                         | 1.346932000  | 5.452943000  | -0.289292000 |
| 6                                         | 1.884497000  | 3.086245000  | -2.772680000 |
| 1                                         | 2.145967000  | 2.031240000  | -2.858741000 |
| 1                                         | 0.966405000  | 3.233755000  | -3.352025000 |
| 1                                         | 2.672035000  | 3.667415000  | -3.265499000 |
| 7                                         | 0.501730000  | 0.218150000  | -4.336486000 |
| 7                                         | 0.350624000  | 0.169961000  | -3.214104000 |
| [2c'' <sub>PB</sub> ] (TE = -3506.135445) |              |              |              |
| 6                                         | 1.377609000  | -0.760548000 | 1.886123000  |
| 6                                         | 1.415164000  | -1.501338000 | 3.081954000  |
| 1                                         | 0.487786000  | -1.650451000 | 3.635295000  |
| 6                                         | 2.587578000  | -2.054932000 | 3.584616000  |
| 1                                         | 2.566797000  | -2.624029000 | 4.512510000  |
| 6                                         | 3.783117000  | -1.883237000 | 2.895840000  |
| 1                                         | 4.708760000  | -2.311461000 | 3.274925000  |
| 6                                         | 3.779767000  | -1.171384000 | 1.702110000  |
| 1                                         | 4.713654000  | -1.063027000 | 1.155555000  |
| 6                                         | 2.599583000  | -0.622248000 | 1.188706000  |
| 6                                         | -0.241484000 | 1.430345000  | 1.904287000  |
| 6                                         | 0.259418000  | 1.842150000  | 3.151422000  |
| 1                                         | 0.887795000  | 1.152716000  | 3.716557000  |
| 6                                         | -0.013235000 | 3.095364000  | 3.689926000  |
| 1                                         | 0.404940000  | 3.375661000  | 4.655377000  |
| 6                                         | -0.825106000 | 3.985975000  | 2.996391000  |
| 1                                         | -1.053131000 | 4.966305000  | 3.409591000  |
| 6                                         | -1.334777000 | 3.613482000  | 1.756898000  |
| 1                                         | -1.960335000 | 4.316555000  | 1.211139000  |
| 6                                         | -1.037506000 | 2.366189000  | 1.198272000  |
| 6                                         | -1.298543000 | -1.019873000 | 1.710861000  |
| 6                                         | -1.982324000 | -0.870185000 | 2.931433000  |
| 1                                         | -1.646887000 | -0.100473000 | 3.627630000  |
| 6                                         | -3.083317000 | -1.645187000 | 3.273188000  |
| 1                                         | -3.586612000 | -1.488495000 | 4.225854000  |
| 6                                         | -3.550419000 | -2.607667000 | 2.384403000  |
| 1                                         | -4.421802000 | -3.212022000 | 2.627970000  |
| 6                                         | -2.897606000 | -2.783328000 | 1.171234000  |
| 1                                         | -3.280936000 | -3.525950000 | 0.477426000  |
| 6                                         | -1.780807000 | -2.010745000 | 0.827005000  |
| 23                                        | 0.128210000  | 0.133825000  | -1.131010000 |
| 6                                         | 3.491743000  | 1.757305000  | -0.262909000 |
| 1                                         | 4.507240000  | 1.486268000  | 0.060512000  |
| 6                                         | -3.392560000 | 1.791128000  | -0.483824000 |



|    |              |              |              |
|----|--------------|--------------|--------------|
| 1  | -3.754814000 | 2.795265000  | -0.222323000 |
| 6  | -0.052891000 | -3.750529000 | -0.856619000 |
| 1  | -0.164115000 | -4.095526000 | -1.895539000 |
| 6  | -0.596692000 | -4.817377000 | 0.082580000  |
| 1  | -0.023896000 | -5.745373000 | -0.027672000 |
| 1  | -0.507809000 | -4.502849000 | 1.127614000  |
| 1  | -1.645549000 | -5.061639000 | -0.094244000 |
| 6  | 1.428850000  | -3.528704000 | -0.600096000 |
| 1  | 1.614004000  | -3.123594000 | 0.400200000  |
| 1  | 1.980914000  | -4.472347000 | -0.678508000 |
| 1  | 1.855109000  | -2.830278000 | -1.321799000 |
| 6  | 3.574859000  | 2.496179000  | -1.593336000 |
| 1  | 4.117921000  | 1.938249000  | -2.360217000 |
| 1  | 2.580842000  | 2.701191000  | -2.000672000 |
| 1  | 4.081014000  | 3.460474000  | -1.473731000 |
| 6  | 2.857777000  | 2.615216000  | 0.821471000  |
| 1  | 2.856183000  | 2.111911000  | 1.792475000  |
| 1  | 3.404003000  | 3.558472000  | 0.934640000  |
| 1  | 1.816731000  | 2.862787000  | 0.591347000  |
| 6  | -3.890587000 | 1.419640000  | -1.875037000 |
| 1  | -4.985502000 | 1.416772000  | -1.912771000 |
| 1  | -3.539150000 | 2.097832000  | -2.658997000 |
| 1  | -3.553735000 | 0.412957000  | -2.147725000 |
| 6  | -3.913753000 | 0.818786000  | 0.558269000  |
| 1  | -3.617985000 | -0.210435000 | 0.335738000  |
| 1  | -3.550809000 | 1.050661000  | 1.562910000  |
| 1  | -5.009095000 | 0.844089000  | 0.585051000  |
| 5  | -0.015056000 | -0.093783000 | 1.467075000  |
| 15 | 2.556279000  | 0.150793000  | -0.473318000 |
| 15 | -1.526221000 | 1.920886000  | -0.510444000 |
| 15 | -0.995251000 | -2.116475000 | -0.827306000 |
| 6  | -1.316328000 | 3.462175000  | -1.583146000 |
| 1  | -1.319762000 | 3.026927000  | -2.593930000 |
| 6  | 0.052607000  | 4.086436000  | -1.363882000 |
| 1  | 0.257859000  | 4.850546000  | -2.121271000 |
| 1  | 0.126787000  | 4.567077000  | -0.382549000 |
| 1  | 0.846739000  | 3.340297000  | -1.419759000 |
| 6  | -2.403792000 | 4.530923000  | -1.549948000 |
| 1  | -2.158184000 | 5.320617000  | -2.269154000 |
| 1  | -3.393057000 | 4.156476000  | -1.821044000 |
| 1  | -2.491136000 | 5.017899000  | -0.574734000 |
| 6  | 3.766552000  | -0.896211000 | -1.486507000 |
| 1  | 3.678248000  | -1.884735000 | -1.016848000 |
| 6  | 5.241616000  | -0.507151000 | -1.452829000 |
| 1  | 5.835183000  | -1.271419000 | -1.967120000 |
| 1  | 5.437167000  | 0.436691000  | -1.968550000 |

|   |              |              |              |
|---|--------------|--------------|--------------|
| 1 | 5.651440000  | -0.413401000 | -0.444971000 |
| 6 | 3.287614000  | -1.010282000 | -2.930297000 |
| 1 | 3.922860000  | -1.699495000 | -3.498013000 |
| 1 | 2.256191000  | -1.372793000 | -2.997472000 |
| 1 | 3.317937000  | -0.044426000 | -3.446713000 |
| 6 | -2.420804000 | -2.430820000 | -2.024362000 |
| 1 | -3.239302000 | -1.827838000 | -1.601590000 |
| 6 | -2.049535000 | -1.852809000 | -3.387734000 |
| 1 | -1.154658000 | -2.335430000 | -3.801106000 |
| 1 | -2.859124000 | -2.005795000 | -4.110049000 |
| 1 | -1.841486000 | -0.781368000 | -3.339639000 |
| 6 | -2.916816000 | -3.862180000 | -2.200487000 |
| 1 | -2.137141000 | -4.522778000 | -2.592699000 |
| 1 | -3.299669000 | -4.316669000 | -1.285665000 |
| 1 | -3.735666000 | -3.882167000 | -2.928407000 |
| 7 | 0.462330000  | 1.118354000  | -4.095747000 |
| 7 | 0.336489000  | 0.714087000  | -3.043798000 |

[2d''<sub>sc</sub>] (TE = -3334.525177)

|   |              |              |              |
|---|--------------|--------------|--------------|
| 6 | -0.007645000 | -1.625328000 | 1.072893000  |
| 6 | -0.681649000 | -2.191235000 | 2.169061000  |
| 1 | -1.294850000 | -1.543967000 | 2.793352000  |
| 6 | -0.585125000 | -3.539879000 | 2.490675000  |
| 1 | -1.126542000 | -3.928508000 | 3.351204000  |
| 6 | 0.203480000  | -4.389029000 | 1.721092000  |
| 1 | 0.284748000  | -5.446010000 | 1.963320000  |
| 6 | 0.854945000  | -3.874896000 | 0.606806000  |
| 1 | 1.425669000  | -4.532780000 | -0.046054000 |
| 6 | 0.742606000  | -2.522171000 | 0.282967000  |
| 6 | 1.113131000  | 0.556639000  | 1.480020000  |
| 6 | 1.627945000  | 0.104378000  | 2.707315000  |
| 1 | 1.219153000  | -0.807136000 | 3.139199000  |
| 6 | 2.629322000  | 0.779747000  | 3.394444000  |
| 1 | 2.991241000  | 0.386045000  | 4.342443000  |
| 6 | 3.163089000  | 1.955914000  | 2.878113000  |
| 1 | 3.947084000  | 2.492226000  | 3.407488000  |
| 6 | 2.709850000  | 2.414470000  | 1.647709000  |
| 1 | 3.157669000  | 3.295963000  | 1.192583000  |
| 6 | 1.714701000  | 1.721565000  | 0.956247000  |
| 6 | -1.361234000 | 0.465451000  | 1.227593000  |
| 6 | -1.536239000 | 1.002501000  | 2.514800000  |
| 1 | -0.688032000 | 1.005303000  | 3.196297000  |
| 6 | -2.744520000 | 1.532042000  | 2.950842000  |
| 1 | -2.822850000 | 1.937301000  | 3.958012000  |
| 6 | -3.845490000 | 1.551230000  | 2.102378000  |
| 1 | -4.792379000 | 1.977387000  | 2.425316000  |

|    |              |              |              |
|----|--------------|--------------|--------------|
| 6  | -3.706867000 | 1.054677000  | 0.812490000  |
| 1  | -4.534406000 | 1.123013000  | 0.110605000  |
| 6  | -2.491309000 | 0.516748000  | 0.380809000  |
| 16 | -2.320999000 | 0.157177000  | -1.369692000 |
| 16 | 1.364832000  | -1.983046000 | -1.306390000 |
| 16 | 1.385587000  | 2.202138000  | -0.735798000 |
| 23 | 0.161170000  | 0.177399000  | -1.440333000 |
| 6  | 3.232437000  | -1.940059000 | -1.119327000 |
| 1  | 3.521054000  | -2.998352000 | -1.092581000 |
| 6  | 0.410294000  | 3.802605000  | -0.609407000 |
| 1  | 1.150892000  | 4.540929000  | -0.277131000 |
| 6  | -3.198392000 | -1.483400000 | -1.650403000 |
| 1  | -3.123192000 | -1.542157000 | -2.744176000 |
| 6  | -4.653837000 | -1.393831000 | -1.244078000 |
| 1  | -5.185164000 | -2.299782000 | -1.555535000 |
| 1  | -4.759290000 | -1.317894000 | -0.157369000 |
| 1  | -5.161330000 | -0.537577000 | -1.696185000 |
| 6  | -2.487959000 | -2.657206000 | -1.020711000 |
| 1  | -2.471661000 | -2.578203000 | 0.070578000  |
| 1  | -3.004944000 | -3.589706000 | -1.275262000 |
| 1  | -1.455303000 | -2.743774000 | -1.366024000 |
| 6  | 3.757483000  | -1.286838000 | -2.381759000 |
| 1  | 3.408897000  | -1.787585000 | -3.289643000 |
| 1  | 3.442800000  | -0.237897000 | -2.434927000 |
| 1  | 4.851835000  | -1.304324000 | -2.390214000 |
| 6  | 3.690412000  | -1.237513000 | 0.134880000  |
| 1  | 3.251994000  | -1.668945000 | 1.038578000  |
| 1  | 4.780210000  | -1.311918000 | 0.225528000  |
| 1  | 3.431628000  | -0.175067000 | 0.111835000  |
| 6  | -0.047238000 | 4.117301000  | -2.019142000 |
| 1  | -0.553504000 | 5.087325000  | -2.045872000 |
| 1  | 0.782043000  | 4.153786000  | -2.731557000 |
| 1  | -0.759978000 | 3.362402000  | -2.372284000 |
| 6  | -0.733853000 | 3.723342000  | 0.370610000  |
| 1  | -1.486889000 | 3.001138000  | 0.041615000  |
| 1  | -0.406137000 | 3.431998000  | 1.371918000  |
| 1  | -1.223768000 | 4.700515000  | 0.451722000  |
| 6  | -0.042766000 | -0.137886000 | 0.779349000  |
| 7  | 0.518322000  | 0.628892000  | -4.542419000 |
| 7  | 0.377712000  | 0.462498000  | -3.431386000 |

[2e''<sub>ssi</sub>] (TE = -3585.931978)

|   |             |              |             |
|---|-------------|--------------|-------------|
| 6 | 0.854225000 | -1.796102000 | 1.325354000 |
| 6 | 0.791078000 | -2.428067000 | 2.575102000 |
| 1 | 0.209598000 | -1.970398000 | 3.376297000 |
| 6 | 1.444142000 | -3.631091000 | 2.824815000 |

|    |              |              |              |
|----|--------------|--------------|--------------|
| 1  | 1.373973000  | -4.097491000 | 3.805643000  |
| 6  | 2.181319000  | -4.242806000 | 1.814709000  |
| 1  | 2.688440000  | -5.187411000 | 1.998916000  |
| 6  | 2.248324000  | -3.655690000 | 0.555867000  |
| 1  | 2.796496000  | -4.143471000 | -0.248331000 |
| 6  | 1.591167000  | -2.447627000 | 0.321606000  |
| 6  | 0.962717000  | 1.257022000  | 1.707367000  |
| 6  | 1.366723000  | 1.278622000  | 3.049846000  |
| 1  | 1.139391000  | 0.424896000  | 3.689486000  |
| 6  | 2.060794000  | 2.355039000  | 3.593249000  |
| 1  | 2.361484000  | 2.339505000  | 4.639129000  |
| 6  | 2.379318000  | 3.449331000  | 2.793765000  |
| 1  | 2.929465000  | 4.291605000  | 3.207706000  |
| 6  | 2.015079000  | 3.452981000  | 1.451896000  |
| 1  | 2.288752000  | 4.289964000  | 0.811773000  |
| 6  | 1.315334000  | 2.368005000  | 0.922777000  |
| 6  | -1.776475000 | -0.117585000 | 1.466659000  |
| 6  | -2.176070000 | 0.032848000  | 2.801694000  |
| 1  | -1.417835000 | 0.069294000  | 3.584711000  |
| 6  | -3.514288000 | 0.161122000  | 3.161583000  |
| 1  | -3.789453000 | 0.281686000  | 4.207676000  |
| 6  | -4.499080000 | 0.157876000  | 2.178821000  |
| 1  | -5.545992000 | 0.279813000  | 2.447987000  |
| 6  | -4.139641000 | 0.024107000  | 0.841622000  |
| 1  | -4.899207000 | 0.059060000  | 0.063701000  |
| 6  | -2.795109000 | -0.124895000 | 0.496010000  |
| 16 | -2.393224000 | -0.238463000 | -1.269080000 |
| 16 | 1.675594000  | -1.760500000 | -1.353524000 |
| 16 | 0.921332000  | 2.411211000  | -0.845057000 |
| 23 | 0.076726000  | 0.169117000  | -1.623108000 |
| 6  | 3.461651000  | -1.182997000 | -1.378558000 |
| 1  | 4.042800000  | -2.108776000 | -1.282797000 |
| 6  | -0.436434000 | 3.705541000  | -0.850565000 |
| 1  | 0.066584000  | 4.623197000  | -0.520670000 |
| 6  | -2.757763000 | -2.046027000 | -1.624032000 |
| 1  | -2.362688000 | -2.122961000 | -2.645818000 |
| 6  | -4.247410000 | -2.318524000 | -1.621401000 |
| 1  | -4.443091000 | -3.335251000 | -1.979625000 |
| 1  | -4.661325000 | -2.251707000 | -0.610477000 |
| 1  | -4.798175000 | -1.625162000 | -2.261885000 |
| 6  | -1.994644000 | -2.970794000 | -0.703161000 |
| 1  | -2.304351000 | -2.844158000 | 0.339947000  |
| 1  | -2.183200000 | -4.014903000 | -0.975722000 |
| 1  | -0.917269000 | -2.800282000 | -0.754095000 |
| 6  | 3.699886000  | -0.550895000 | -2.733783000 |
| 1  | 3.447510000  | -1.222143000 | -3.559465000 |

|    |              |              |              |
|----|--------------|--------------|--------------|
| 1  | 3.102548000  | 0.361350000  | -2.846959000 |
| 1  | 4.752373000  | -0.269467000 | -2.839004000 |
| 6  | 3.773659000  | -0.242595000 | -0.236868000 |
| 1  | 3.552339000  | -0.678722000 | 0.741291000  |
| 1  | 4.837027000  | 0.021633000  | -0.249695000 |
| 1  | 3.202656000  | 0.686730000  | -0.326229000 |
| 6  | -0.899887000 | 3.847386000  | -2.285284000 |
| 1  | -1.642441000 | 4.647545000  | -2.365147000 |
| 1  | -0.079173000 | 4.081297000  | -2.969096000 |
| 1  | -1.374438000 | 2.922329000  | -2.633303000 |
| 6  | -1.565211000 | 3.354053000  | 0.091633000  |
| 1  | -2.076185000 | 2.441853000  | -0.231010000 |
| 1  | -1.224351000 | 3.201018000  | 1.119462000  |
| 1  | -2.307102000 | 4.160382000  | 0.104284000  |
| 14 | 0.022153000  | -0.154355000 | 0.828318000  |
| 7  | 0.146863000  | 0.396808000  | -4.770775000 |
| 7  | 0.116043000  | 0.322482000  | -3.638567000 |

[2f'<sub>SB</sub>] (TE = -3321.285024)

|   |              |              |              |
|---|--------------|--------------|--------------|
| 6 | -0.222352000 | 1.773758000  | 1.121187000  |
| 6 | 0.257512000  | 2.435356000  | 2.266214000  |
| 1 | 0.862099000  | 1.872508000  | 2.978548000  |
| 6 | -0.003008000 | 3.776874000  | 2.522081000  |
| 1 | 0.389973000  | 4.244292000  | 3.423091000  |
| 6 | -0.756448000 | 4.524037000  | 1.621443000  |
| 1 | -0.958706000 | 5.576646000  | 1.806118000  |
| 6 | -1.220427000 | 3.918569000  | 0.460335000  |
| 1 | -1.769009000 | 4.498575000  | -0.279738000 |
| 6 | -0.955675000 | 2.568654000  | 0.223135000  |
| 6 | -1.131702000 | -0.717179000 | 1.585945000  |
| 6 | -1.642193000 | -0.397223000 | 2.857631000  |
| 1 | -1.285055000 | 0.508035000  | 3.349762000  |
| 6 | -2.586356000 | -1.182604000 | 3.508969000  |
| 1 | -2.948976000 | -0.891419000 | 4.493072000  |
| 6 | -3.075328000 | -2.333645000 | 2.898435000  |
| 1 | -3.821442000 | -2.951074000 | 3.393505000  |
| 6 | -2.624592000 | -2.668578000 | 1.628038000  |
| 1 | -3.030604000 | -3.537378000 | 1.112907000  |
| 6 | -1.670956000 | -1.871839000 | 0.991171000  |
| 6 | 1.516813000  | -0.295932000 | 1.320658000  |
| 6 | 1.795954000  | -0.691594000 | 2.641792000  |
| 1 | 0.984750000  | -0.681439000 | 3.370421000  |
| 6 | 3.054728000  | -1.114952000 | 3.052582000  |
| 1 | 3.216427000  | -1.413614000 | 4.086723000  |
| 6 | 4.098772000  | -1.179869000 | 2.135954000  |
| 1 | 5.082283000  | -1.533393000 | 2.437168000  |

|    |              |              |              |
|----|--------------|--------------|--------------|
| 6  | 3.862741000  | -0.819369000 | 0.815250000  |
| 1  | 4.651452000  | -0.916249000 | 0.072725000  |
| 6  | 2.598610000  | -0.369909000 | 0.422682000  |
| 16 | 2.335168000  | -0.087459000 | -1.335554000 |
| 16 | -1.423566000 | 1.896900000  | -1.375129000 |
| 16 | -1.270338000 | -2.268070000 | -0.713536000 |
| 23 | -0.138660000 | -0.218456000 | -1.518022000 |
| 6  | -3.285773000 | 1.707751000  | -1.240544000 |
| 1  | -3.654299000 | 2.741212000  | -1.227529000 |
| 6  | -0.182916000 | -3.789496000 | -0.558576000 |
| 1  | -0.869770000 | -4.569934000 | -0.207549000 |
| 6  | 3.093007000  | 1.604580000  | -1.640812000 |
| 1  | 2.860722000  | 1.727693000  | -2.706773000 |
| 6  | 4.593869000  | 1.564698000  | -1.442605000 |
| 1  | 5.040135000  | 2.506390000  | -1.780318000 |
| 1  | 4.851139000  | 1.450403000  | -0.385135000 |
| 1  | 5.067175000  | 0.751340000  | -1.998708000 |
| 6  | 2.428106000  | 2.693424000  | -0.832728000 |
| 1  | 2.522111000  | 2.507618000  | 0.242574000  |
| 1  | 2.900362000  | 3.660030000  | -1.041455000 |
| 1  | 1.365356000  | 2.784013000  | -1.063054000 |
| 6  | -3.733350000 | 1.007658000  | -2.507180000 |
| 1  | -3.410491000 | 1.530483000  | -3.412050000 |
| 1  | -3.334538000 | -0.012956000 | -2.547986000 |
| 1  | -4.825127000 | 0.935415000  | -2.533865000 |
| 6  | -3.712630000 | 0.979168000  | 0.011034000  |
| 1  | -3.317273000 | 1.440633000  | 0.920039000  |
| 1  | -4.806004000 | 0.978382000  | 0.086006000  |
| 1  | -3.381337000 | -0.062894000 | -0.004907000 |
| 6  | 0.301228000  | -4.107341000 | -1.958332000 |
| 1  | 0.883791000  | -5.033900000 | -1.956476000 |
| 1  | -0.521139000 | -4.230398000 | -2.668877000 |
| 1  | 0.953167000  | -3.309212000 | -2.333462000 |
| 6  | 0.949908000  | -3.600592000 | 0.421140000  |
| 1  | 1.655384000  | -2.844070000 | 0.066255000  |
| 1  | 0.601423000  | -3.292754000 | 1.410720000  |
| 1  | 1.501903000  | -4.540017000 | 0.539085000  |
| 5  | 0.033047000  | 0.200641000  | 0.973052000  |
| 7  | -0.427892000 | -0.739540000 | -4.608629000 |
| 7  | -0.311737000 | -0.549037000 | -3.499012000 |

{[HIPTN<sub>3</sub>N]-V-N<sub>2</sub>} (TE= -2203.040594)

|    |              |              |              |
|----|--------------|--------------|--------------|
| 23 | -0.170321000 | -0.003856000 | -0.522504000 |
| 7  | -2.131179000 | -0.029088000 | -0.663498000 |

|   |              |              |              |
|---|--------------|--------------|--------------|
| 7 | 0.970655000  | -1.476908000 | -1.147411000 |
| 7 | 0.682478000  | 1.746878000  | -0.557166000 |
| 6 | -2.583952000 | 0.902152000  | -1.687661000 |
| 1 | -3.654322000 | 0.768656000  | -1.900957000 |
| 1 | -2.473214000 | 1.954712000  | -1.375408000 |
| 6 | -1.801802000 | 0.622669000  | -2.960590000 |
| 1 | -2.202297000 | -0.280428000 | -3.428061000 |
| 1 | -1.902957000 | 1.437022000  | -3.689326000 |
| 6 | 0.426814000  | 2.513928000  | -1.774033000 |
| 1 | -0.544045000 | 3.037295000  | -1.750502000 |
| 1 | 1.184993000  | 3.297326000  | -1.910490000 |
| 6 | 0.489392000  | 1.551678000  | -2.939867000 |
| 1 | 1.519045000  | 1.198114000  | -3.045302000 |
| 1 | 0.198775000  | 2.020218000  | -3.891041000 |
| 6 | 1.340251000  | -1.383580000 | -2.552210000 |
| 1 | 2.225561000  | -0.740712000 | -2.704343000 |
| 1 | 1.617347000  | -2.368422000 | -2.958130000 |
| 6 | 0.154492000  | -0.850981000 | -3.324602000 |
| 1 | 0.398633000  | -0.657300000 | -4.379852000 |
| 1 | -0.648404000 | -1.592656000 | -3.294996000 |
| 7 | -0.363523000 | 0.371541000  | -2.663440000 |
| 6 | 1.823242000  | -2.224266000 | -0.339799000 |
| 6 | 1.364072000  | -2.700677000 | 0.904393000  |
| 6 | 3.148605000  | -2.538233000 | -0.700431000 |
| 6 | 2.193882000  | -3.408204000 | 1.758783000  |
| 1 | 0.324602000  | -2.531966000 | 1.177245000  |
| 6 | 3.971717000  | -3.256993000 | 0.159482000  |
| 1 | 3.547391000  | -2.200346000 | -1.652973000 |
| 6 | 3.510984000  | -3.690653000 | 1.397829000  |
| 1 | 1.801198000  | -3.761745000 | 2.710308000  |
| 1 | 4.993728000  | -3.474499000 | -0.146139000 |
| 1 | 4.159970000  | -4.251567000 | 2.065456000  |
| 6 | -3.053784000 | -0.419478000 | 0.298104000  |
| 6 | -2.837337000 | -1.622507000 | 0.998737000  |
| 6 | -4.207246000 | 0.321347000  | 0.618736000  |
| 6 | -3.709007000 | -2.046427000 | 1.988277000  |
| 1 | -1.974908000 | -2.231169000 | 0.725981000  |
| 6 | -5.083439000 | -0.118050000 | 1.605032000  |
| 1 | -4.403935000 | 1.263148000  | 0.112151000  |
| 6 | -4.843393000 | -1.297906000 | 2.301812000  |
| 1 | -3.512906000 | -2.982318000 | 2.508137000  |
| 1 | -5.962461000 | 0.480483000  | 1.837928000  |
| 1 | -5.532229000 | -1.635052000 | 3.072169000  |
| 6 | 1.325514000  | 2.427215000  | 0.479002000  |
| 6 | 2.176633000  | 1.721196000  | 1.348238000  |
| 6 | 1.175379000  | 3.809608000  | 0.688187000  |

|   |              |              |             |
|---|--------------|--------------|-------------|
| 6 | 2.815469000  | 2.360232000  | 2.399766000 |
| 1 | 2.347182000  | 0.659854000  | 1.168212000 |
| 6 | 1.828126000  | 4.445185000  | 1.738055000 |
| 1 | 0.521759000  | 4.384799000  | 0.036072000 |
| 6 | 2.646464000  | 3.728496000  | 2.605549000 |
| 1 | 3.469699000  | 1.786826000  | 3.053435000 |
| 1 | 1.686522000  | 5.514675000  | 1.882945000 |
| 1 | 3.155076000  | 4.230023000  | 3.425073000 |
| 7 | -0.362823000 | -0.011718000 | 2.661187000 |
| 7 | -0.231162000 | -0.073678000 | 1.556795000 |

Cartesian coordinates of  $[2a'_{PC}]^-$ - $[2f'_{SB}]^-$ ,  $[2a''_{PC}]^-$ - $[2f''_{SB}]^-$  and  $\{[HIPTN_3N]-V-N_2\}^-$ , along with their total energies (in hartree) including zero point vibrational correction at M06-L-D3(heptane)/6-311+G\* level of theory.

$[2a'_{PC}]^-$  (TE = -3062.130489)

|    |              |              |              |
|----|--------------|--------------|--------------|
| 6  | -0.004952000 | 2.366729000  | 1.911036000  |
| 6  | 0.570428000  | 1.097484000  | 2.521841000  |
| 6  | -2.638018000 | 0.037645000  | 1.732988000  |
| 6  | -1.452165000 | -0.376032000 | 2.603071000  |
| 6  | 2.222127000  | -1.422361000 | 1.901842000  |
| 6  | 0.816379000  | -1.358955000 | 2.498891000  |
| 1  | -2.693565000 | 1.129953000  | 1.625152000  |
| 1  | -1.526702000 | 0.141985000  | 3.582606000  |
| 1  | 2.758864000  | -2.335193000 | 2.202485000  |
| 1  | 0.908304000  | -1.337821000 | 3.610074000  |
| 1  | 0.432527000  | 3.276722000  | 2.345936000  |
| 1  | 1.655328000  | 1.102975000  | 2.334495000  |
| 6  | -0.717743000 | 3.719331000  | -0.624970000 |
| 1  | -0.031240000 | 4.177430000  | -1.353774000 |
| 6  | -2.668628000 | -2.453006000 | 0.293250000  |
| 1  | -1.912494000 | -2.671055000 | 1.064518000  |
| 6  | 3.720655000  | -0.463970000 | -0.448408000 |
| 1  | 3.514164000  | 0.593572000  | -0.231981000 |
| 23 | -0.009735000 | -0.137744000 | -0.440718000 |
| 6  | -0.046179000 | -0.197245000 | 1.983421000  |
| 1  | -1.084169000 | 2.424011000  | 2.097996000  |
| 1  | 0.469683000  | 1.156206000  | 3.631132000  |
| 1  | 0.300652000  | -2.304857000 | 2.276426000  |
| 1  | 2.830395000  | -0.585526000 | 2.268153000  |
| 1  | -1.598347000 | -1.439592000 | 2.853312000  |
| 1  | -3.596032000 | -0.278801000 | 2.174353000  |
| 6  | 4.988921000  | -0.824571000 | 0.318182000  |
| 1  | 5.795746000  | -0.121187000 | 0.071327000  |
| 1  | 4.848364000  | -0.779446000 | 1.402342000  |



|   |              |              |              |
|---|--------------|--------------|--------------|
| 1 | 5.362512000  | -1.823194000 | 0.082386000  |
| 6 | 3.907973000  | -0.580286000 | -1.956359000 |
| 1 | 4.178192000  | -1.598439000 | -2.257733000 |
| 1 | 2.993596000  | -0.318994000 | -2.499416000 |
| 1 | 4.708354000  | 0.081274000  | -2.311779000 |
| 6 | -4.030379000 | -2.849087000 | 0.847714000  |
| 1 | -4.042937000 | -3.908033000 | 1.139637000  |
| 1 | -4.315599000 | -2.269065000 | 1.731013000  |
| 1 | -4.822652000 | -2.723628000 | 0.101037000  |
| 6 | -2.310887000 | -3.294521000 | -0.928921000 |
| 1 | -3.112910000 | -3.296447000 | -1.672673000 |
| 1 | -1.407386000 | -2.926463000 | -1.425035000 |
| 1 | -2.138631000 | -4.341202000 | -0.646954000 |
| 6 | -1.944788000 | 3.234751000  | -1.380536000 |
| 1 | -1.704578000 | 2.425192000  | -2.078627000 |
| 1 | -2.692903000 | 2.841947000  | -0.681589000 |
| 1 | -2.423030000 | 4.049077000  | -1.940432000 |
| 6 | -1.120088000 | 4.779658000  | 0.392922000  |
| 1 | -0.278695000 | 5.165680000  | 0.973167000  |
| 1 | -1.599863000 | 5.636156000  | -0.099054000 |
| 1 | -1.847769000 | 4.381146000  | 1.108799000  |
| 6 | 2.239238000  | -3.039241000 | -0.527225000 |
| 1 | 2.009924000  | -2.973420000 | -1.601584000 |
| 6 | 1.153881000  | -3.879909000 | 0.134881000  |
| 1 | 1.395005000  | -4.074289000 | 1.187462000  |
| 1 | 0.179939000  | -3.384730000 | 0.108604000  |
| 1 | 1.053233000  | -4.855377000 | -0.357620000 |
| 6 | 3.583276000  | -3.733446000 | -0.352678000 |
| 1 | 3.509161000  | -4.795224000 | -0.625349000 |
| 1 | 4.372600000  | -3.303476000 | -0.972749000 |
| 1 | 3.926644000  | -3.699980000 | 0.688720000  |
| 6 | -3.797498000 | 0.043408000  | -0.952626000 |
| 1 | -3.422611000 | 1.017713000  | -1.286452000 |
| 6 | -5.084065000 | 0.297761000  | -0.176235000 |
| 1 | -5.513026000 | -0.618946000 | 0.239387000  |
| 1 | -4.934803000 | 0.990470000  | 0.657277000  |
| 1 | -5.848629000 | 0.740191000  | -0.829439000 |
| 6 | -4.053364000 | -0.773515000 | -2.212049000 |
| 1 | -4.544349000 | -1.726345000 | -1.986400000 |
| 1 | -4.716490000 | -0.232780000 | -2.899166000 |
| 1 | -3.127687000 | -0.996133000 | -2.752272000 |
| 6 | 2.006146000  | 2.962394000  | -0.077126000 |
| 1 | 2.588233000  | 2.273354000  | 0.553607000  |
| 6 | 2.245692000  | 4.379858000  | 0.421922000  |
| 1 | 3.312652000  | 4.636705000  | 0.374111000  |
| 1 | 1.719900000  | 5.120566000  | -0.191932000 |

|    |              |              |              |
|----|--------------|--------------|--------------|
| 1  | 1.929483000  | 4.525767000  | 1.459458000  |
| 6  | 2.485653000  | 2.813394000  | -1.514811000 |
| 1  | 3.562089000  | 3.009825000  | -1.606264000 |
| 1  | 2.289392000  | 1.810394000  | -1.906911000 |
| 1  | 1.976534000  | 3.523473000  | -2.179019000 |
| 15 | -2.323714000 | -0.610702000 | 0.024212000  |
| 15 | 0.258210000  | 2.252408000  | 0.082528000  |
| 15 | 2.078188000  | -1.242216000 | 0.059084000  |
| 7  | 0.026531000  | -1.154088000 | -3.365911000 |
| 7  | 0.001502000  | -0.744893000 | -2.277230000 |

[2b'<sub>psi</sub>]' (TE = -3313.578313)

|    |              |              |              |
|----|--------------|--------------|--------------|
| 6  | -0.461970000 | 2.636554000  | 1.885835000  |
| 6  | 0.260736000  | 1.660393000  | 2.807436000  |
| 6  | -2.743734000 | -0.451113000 | 1.898751000  |
| 6  | -1.592539000 | -0.792036000 | 2.846387000  |
| 6  | 2.717557000  | -1.003371000 | 1.832425000  |
| 6  | 1.530837000  | -1.137333000 | 2.790774000  |
| 1  | -2.958879000 | 0.627171000  | 1.940559000  |
| 1  | -1.799822000 | -0.409505000 | 3.857610000  |
| 1  | 3.514163000  | -1.743315000 | 2.013643000  |
| 1  | 1.827917000  | -0.827429000 | 3.804658000  |
| 1  | -0.312662000 | 3.698465000  | 2.134544000  |
| 1  | 1.333958000  | 1.906313000  | 2.846387000  |
| 6  | -0.973918000 | 3.524585000  | -0.863683000 |
| 1  | -0.385846000 | 4.454752000  | -0.908665000 |
| 6  | -2.512653000 | -2.659313000 | 0.102224000  |
| 1  | -1.897145000 | -2.963095000 | 0.964556000  |
| 6  | 3.668721000  | -0.187201000 | -0.780866000 |
| 1  | 3.452494000  | 0.869062000  | -0.563847000 |
| 23 | -0.005890000 | -0.088297000 | -0.433488000 |
| 1  | -1.543279000 | 2.459453000  | 1.940138000  |
| 1  | -0.107608000 | 1.750300000  | 3.841469000  |
| 1  | 1.229875000  | -2.189391000 | 2.875551000  |
| 1  | 3.189136000  | -0.019275000 | 1.976311000  |
| 1  | -1.517767000 | -1.885449000 | 2.952548000  |
| 1  | -3.686358000 | -0.956650000 | 2.158485000  |
| 6  | 5.068544000  | -0.461363000 | -0.238995000 |
| 1  | 5.784360000  | 0.255652000  | -0.663509000 |
| 1  | 5.125857000  | -0.361081000 | 0.848609000  |
| 1  | 5.438072000  | -1.457068000 | -0.493251000 |
| 6  | 3.599051000  | -0.354363000 | -2.292685000 |
| 1  | 3.824834000  | -1.381840000 | -2.601165000 |
| 1  | 2.603207000  | -0.117573000 | -2.679310000 |
| 1  | 4.322866000  | 0.297226000  | -2.799207000 |
| 6  | -3.926886000 | -3.169582000 | 0.343190000  |

|    |              |              |              |
|----|--------------|--------------|--------------|
| 1  | -3.928493000 | -4.257451000 | 0.496028000  |
| 1  | -4.401437000 | -2.722008000 | 1.221632000  |
| 1  | -4.577455000 | -2.976867000 | -0.517044000 |
| 6  | -1.905864000 | -3.311919000 | -1.133042000 |
| 1  | -2.482243000 | -3.092676000 | -2.037816000 |
| 1  | -0.887128000 | -2.959119000 | -1.312913000 |
| 1  | -1.876472000 | -4.404361000 | -1.024420000 |
| 6  | -1.184648000 | 3.015555000  | -2.285656000 |
| 1  | -0.247438000 | 2.750736000  | -2.784384000 |
| 1  | -1.794944000 | 2.104082000  | -2.286561000 |
| 1  | -1.697035000 | 3.764146000  | -2.904326000 |
| 6  | -2.314344000 | 3.843879000  | -0.215761000 |
| 1  | -2.208367000 | 4.379424000  | 0.732021000  |
| 1  | -2.934249000 | 4.462660000  | -0.876879000 |
| 1  | -2.885818000 | 2.929642000  | -0.008816000 |
| 6  | 2.319472000  | -2.837300000 | -0.422898000 |
| 1  | 1.888115000  | -2.863639000 | -1.435247000 |
| 6  | 1.423047000  | -3.665906000 | 0.492735000  |
| 1  | 1.884454000  | -3.794772000 | 1.479074000  |
| 1  | 0.443698000  | -3.200751000 | 0.645756000  |
| 1  | 1.259848000  | -4.669584000 | 0.079883000  |
| 6  | 3.706530000  | -3.463128000 | -0.469719000 |
| 1  | 3.637206000  | -4.543916000 | -0.655507000 |
| 1  | 4.334899000  | -3.046200000 | -1.259860000 |
| 1  | 4.243328000  | -3.340520000 | 0.478817000  |
| 6  | -3.688389000 | -0.025601000 | -0.819135000 |
| 1  | -3.357663000 | 1.021748000  | -0.884345000 |
| 6  | -5.063275000 | -0.015334000 | -0.161372000 |
| 1  | -5.488359000 | -1.016966000 | -0.055199000 |
| 1  | -5.046248000 | 0.437987000  | 0.833884000  |
| 1  | -5.772203000 | 0.566518000  | -0.766285000 |
| 6  | -3.747878000 | -0.558032000 | -2.244521000 |
| 1  | -4.154658000 | -1.575228000 | -2.280028000 |
| 1  | -4.398554000 | 0.063797000  | -2.872781000 |
| 1  | -2.757904000 | -0.584329000 | -2.711017000 |
| 6  | 1.736614000  | 3.077588000  | 0.066005000  |
| 1  | 2.364701000  | 2.345864000  | 0.596943000  |
| 6  | 1.877688000  | 4.422929000  | 0.762325000  |
| 1  | 2.882051000  | 4.841820000  | 0.612564000  |
| 1  | 1.168257000  | 5.164818000  | 0.374929000  |
| 1  | 1.718472000  | 4.352806000  | 1.841835000  |
| 6  | 2.217607000  | 3.153034000  | -1.376901000 |
| 1  | 3.286895000  | 3.395332000  | -1.433682000 |
| 1  | 2.059536000  | 2.206079000  | -1.906102000 |
| 1  | 1.685535000  | 3.934034000  | -1.934261000 |
| 15 | -2.234241000 | -0.780470000 | 0.126211000  |

|    |             |              |              |
|----|-------------|--------------|--------------|
| 15 | 0.028453000 | 2.253253000  | 0.132230000  |
| 15 | 2.173802000 | -1.003432000 | 0.037641000  |
| 14 | 0.054641000 | -0.123371000 | 2.072652000  |
| 7  | 0.047085000 | -1.071425000 | -3.371682000 |
| 7  | 0.008735000 | -0.701687000 | -2.273644000 |

[2c'<sub>PB</sub>]' (TE = -3048.900287)

|    |              |              |              |
|----|--------------|--------------|--------------|
| 6  | 0.302355000  | 2.610383000  | 1.823457000  |
| 6  | 0.709303000  | 1.342040000  | 2.571016000  |
| 6  | -2.635802000 | 0.366981000  | 1.771053000  |
| 6  | -1.526299000 | -0.149243000 | 2.685001000  |
| 6  | 2.226319000  | -1.444512000 | 1.833225000  |
| 6  | 0.895291000  | -1.327254000 | 2.569355000  |
| 1  | -2.533209000 | 1.448698000  | 1.600934000  |
| 1  | -1.596802000 | 0.383723000  | 3.655590000  |
| 1  | 2.864703000  | -2.287096000 | 2.142945000  |
| 1  | 1.111889000  | -1.271225000 | 3.658806000  |
| 1  | 0.828256000  | 3.524607000  | 2.150914000  |
| 1  | 1.804204000  | 1.258793000  | 2.546365000  |
| 6  | -0.505260000 | 3.761302000  | -0.758670000 |
| 1  | 0.049434000  | 4.024418000  | -1.671880000 |
| 6  | -2.755388000 | -2.225787000 | 0.499956000  |
| 1  | -1.806248000 | -2.544934000 | 0.952844000  |
| 6  | 3.505460000  | -0.955464000 | -0.813922000 |
| 1  | 3.345100000  | 0.114840000  | -0.999652000 |
| 23 | -0.036637000 | -0.017479000 | -0.588070000 |
| 1  | -0.767651000 | 2.808352000  | 1.986279000  |
| 1  | 0.474823000  | 1.499889000  | 3.645837000  |
| 1  | 0.329426000  | -2.266674000 | 2.449527000  |
| 1  | 2.820092000  | -0.540476000 | 2.022749000  |
| 1  | -1.757856000 | -1.199551000 | 2.933394000  |
| 1  | -3.658790000 | 0.207684000  | 2.152657000  |
| 6  | 4.771993000  | -1.083449000 | 0.024760000  |
| 1  | 5.637565000  | -0.685335000 | -0.522137000 |
| 1  | 4.707335000  | -0.530216000 | 0.965514000  |
| 1  | 5.007299000  | -2.121235000 | 0.280556000  |
| 6  | 3.679976000  | -1.593851000 | -2.186833000 |
| 1  | 3.929511000  | -2.658707000 | -2.124269000 |
| 1  | 2.779806000  | -1.498431000 | -2.801226000 |
| 1  | 4.499416000  | -1.110132000 | -2.733117000 |
| 6  | -3.858587000 | -2.538627000 | 1.504269000  |
| 1  | -3.850360000 | -3.609001000 | 1.749447000  |
| 1  | -3.731393000 | -1.996748000 | 2.444909000  |
| 1  | -4.857190000 | -2.311457000 | 1.122965000  |
| 6  | -2.949810000 | -3.013115000 | -0.790146000 |
| 1  | -3.938523000 | -2.830680000 | -1.227047000 |

|    |              |              |              |
|----|--------------|--------------|--------------|
| 1  | -2.205757000 | -2.749732000 | -1.550939000 |
| 1  | -2.874593000 | -4.093486000 | -0.613297000 |
| 6  | -1.887096000 | 3.285068000  | -1.179701000 |
| 1  | -1.838721000 | 2.412550000  | -1.838266000 |
| 1  | -2.479367000 | 2.992722000  | -0.303987000 |
| 1  | -2.442922000 | 4.079324000  | -1.694984000 |
| 6  | -0.647174000 | 5.004615000  | 0.114024000  |
| 1  | 0.301129000  | 5.389021000  | 0.492166000  |
| 1  | -1.132996000 | 5.818060000  | -0.440973000 |
| 1  | -1.277982000 | 4.798608000  | 0.985321000  |
| 5  | 0.002238000  | -0.052232000 | 2.092416000  |
| 7  | 0.235699000  | -0.621627000 | -3.644888000 |
| 7  | 0.170079000  | -0.413482000 | -2.513923000 |
| 6  | -3.818556000 | 0.229239000  | -0.873845000 |
| 1  | -3.732859000 | 1.308731000  | -0.683554000 |
| 6  | -5.217455000 | -0.191897000 | -0.443766000 |
| 1  | -5.980563000 | 0.405425000  | -0.960959000 |
| 1  | -5.421931000 | -1.238667000 | -0.692192000 |
| 1  | -5.383853000 | -0.070247000 | 0.630830000  |
| 6  | -3.621884000 | 0.020267000  | -2.370759000 |
| 1  | -4.368136000 | 0.579391000  | -2.950049000 |
| 1  | -2.630122000 | 0.343585000  | -2.699949000 |
| 1  | -3.722366000 | -1.032961000 | -2.653671000 |
| 6  | 2.256898000  | 2.907352000  | -0.364747000 |
| 1  | 2.435695000  | 2.486785000  | -1.366971000 |
| 6  | 2.535872000  | 4.403756000  | -0.421597000 |
| 1  | 3.581187000  | 4.582597000  | -0.706139000 |
| 1  | 1.912620000  | 4.940440000  | -1.141443000 |
| 1  | 2.396147000  | 4.874533000  | 0.558281000  |
| 6  | 3.242175000  | 2.264612000  | 0.603122000  |
| 1  | 3.026349000  | 1.209030000  | 0.774622000  |
| 1  | 4.271991000  | 2.345406000  | 0.231427000  |
| 1  | 3.208751000  | 2.760159000  | 1.579970000  |
| 6  | 1.796949000  | -3.290069000 | -0.422855000 |
| 1  | 1.848680000  | -3.279427000 | -1.521112000 |
| 6  | 0.453713000  | -3.897631000 | -0.052762000 |
| 1  | 0.372499000  | -4.928682000 | -0.421278000 |
| 1  | 0.302215000  | -3.926538000 | 1.032172000  |
| 1  | -0.364504000 | -3.318399000 | -0.483288000 |
| 6  | 2.934433000  | -4.153168000 | 0.104437000  |
| 1  | 2.842463000  | -5.184519000 | -0.261861000 |
| 1  | 3.921307000  | -3.793988000 | -0.197095000 |
| 1  | 2.927273000  | -4.207599000 | 1.198362000  |
| 15 | 1.864750000  | -1.449226000 | 0.014148000  |
| 15 | 0.486254000  | 2.335221000  | 0.000778000  |
| 15 | -2.357741000 | -0.421033000 | 0.132467000  |

[2d'<sub>sc</sub>]' (TE = -2877.282658)

|    |              |              |              |
|----|--------------|--------------|--------------|
| 6  | 0.157755000  | 2.061535000  | 1.727182000  |
| 6  | 0.255183000  | 0.817215000  | 2.598976000  |
| 6  | -2.655893000 | 0.053929000  | 1.733061000  |
| 6  | -1.605410000 | -0.848165000 | 2.348913000  |
| 6  | 2.124909000  | -1.610616000 | 1.816133000  |
| 6  | 0.741305000  | -1.625820000 | 2.441220000  |
| 1  | -2.554505000 | 1.088207000  | 2.081763000  |
| 1  | -1.743772000 | -0.814114000 | 3.456169000  |
| 1  | 2.770928000  | -2.409702000 | 2.203406000  |
| 1  | 0.879207000  | -1.610159000 | 3.547872000  |
| 1  | 0.574371000  | 2.946566000  | 2.226814000  |
| 1  | 1.304024000  | 0.748288000  | 2.930677000  |
| 6  | 0.659214000  | 3.182646000  | -0.861035000 |
| 1  | 1.333441000  | 3.041358000  | -1.716181000 |
| 6  | -3.623270000 | -1.318352000 | -0.496122000 |
| 1  | -3.423620000 | -2.061430000 | 0.289334000  |
| 6  | 3.504237000  | -0.890664000 | -0.526936000 |
| 1  | 3.503486000  | 0.047680000  | 0.043941000  |
| 23 | -0.089170000 | -0.430929000 | -0.380766000 |
| 16 | -2.429008000 | 0.106563000  | -0.113236000 |
| 16 | 1.102288000  | 1.709338000  | 0.190402000  |
| 16 | 1.930119000  | -1.765771000 | -0.016158000 |
| 6  | -0.174725000 | -0.506932000 | 1.942321000  |
| 1  | -0.875775000 | 2.281645000  | 1.436995000  |
| 1  | -0.317376000 | 1.021182000  | 3.529385000  |
| 1  | 0.277098000  | -2.599482000 | 2.222952000  |
| 1  | 2.630958000  | -0.650715000 | 1.993311000  |
| 1  | -1.825779000 | -1.886407000 | 2.055921000  |
| 1  | -3.682644000 | -0.257558000 | 1.964937000  |
| 6  | 4.724438000  | -1.717961000 | -0.176677000 |
| 1  | 5.649317000  | -1.196564000 | -0.456378000 |
| 1  | 4.783201000  | -1.933705000 | 0.894494000  |
| 1  | 4.713701000  | -2.677121000 | -0.706303000 |
| 6  | 3.402021000  | -0.582146000 | -2.005668000 |
| 1  | 3.296494000  | -1.496904000 | -2.600291000 |
| 1  | 2.526117000  | 0.037497000  | -2.219336000 |
| 1  | 4.299949000  | -0.058943000 | -2.356586000 |
| 6  | -5.058427000 | -0.838221000 | -0.431979000 |
| 1  | -5.764168000 | -1.664461000 | -0.591000000 |
| 1  | -5.305188000 | -0.380741000 | 0.531587000  |
| 1  | -5.251216000 | -0.088919000 | -1.207774000 |
| 6  | -3.254270000 | -1.893383000 | -1.842582000 |
| 1  | -3.354237000 | -1.145499000 | -2.638370000 |
| 1  | -2.213225000 | -2.229876000 | -1.846082000 |

|   |              |              |              |
|---|--------------|--------------|--------------|
| 1 | -3.904068000 | -2.739919000 | -2.096738000 |
| 6 | -0.774744000 | 3.125764000  | -1.346241000 |
| 1 | -0.981647000 | 2.197419000  | -1.884466000 |
| 1 | -1.486758000 | 3.178604000  | -0.515495000 |
| 1 | -0.989509000 | 3.969948000  | -2.013430000 |
| 6 | 0.994998000  | 4.489842000  | -0.168332000 |
| 1 | 2.018133000  | 4.498513000  | 0.218576000  |
| 1 | 0.889128000  | 5.335412000  | -0.858948000 |
| 1 | 0.319793000  | 4.679934000  | 0.672705000  |
| 7 | -0.102773000 | -0.895383000 | -3.455556000 |
| 7 | -0.115624000 | -0.730820000 | -2.302884000 |

[2e' ssi] (TE = -3128.706615)

|    |              |              |              |
|----|--------------|--------------|--------------|
| 23 | 0.052279000  | 0.011096000  | -0.788815000 |
| 16 | 1.872036000  | -1.636591000 | -0.873141000 |
| 16 | -2.088618000 | -1.209767000 | -1.257338000 |
| 16 | -0.600259000 | 1.839475000  | 0.630933000  |
| 14 | -0.302761000 | -1.097982000 | 1.414586000  |
| 6  | -0.564462000 | 0.175804000  | 2.846340000  |
| 6  | -0.016117000 | 1.515537000  | 2.379700000  |
| 6  | -2.165502000 | -2.638633000 | -0.080845000 |
| 6  | -1.849783000 | -2.267867000 | 1.361324000  |
| 6  | 1.204970000  | -2.240915000 | 1.822911000  |
| 6  | 1.673615000  | -2.868454000 | 0.521304000  |
| 1  | 0.912592000  | -3.550680000 | 0.122758000  |
| 1  | 2.601005000  | -3.450808000 | 0.595957000  |
| 1  | 2.016714000  | -1.642970000 | 2.265134000  |
| 1  | 0.979946000  | -3.037086000 | 2.549907000  |
| 1  | -3.136479000 | -3.134403000 | -0.217337000 |
| 1  | -1.407641000 | -3.316117000 | -0.489467000 |
| 1  | -2.717089000 | -1.759419000 | 1.808227000  |
| 1  | -1.719530000 | -3.195159000 | 1.940462000  |
| 1  | -1.641732000 | 0.274147000  | 3.047318000  |
| 1  | -0.093850000 | -0.091817000 | 3.803760000  |
| 1  | 1.080747000  | 1.489616000  | 2.342585000  |
| 1  | -0.319900000 | 2.363623000  | 3.008361000  |
| 6  | 3.398239000  | -0.738319000 | -0.232086000 |
| 1  | 3.019092000  | -0.104464000 | 0.583977000  |
| 6  | -3.449080000 | -0.150057000 | -0.537114000 |
| 1  | -3.066862000 | 0.165735000  | 0.444091000  |
| 6  | 0.312078000  | 3.453212000  | 0.315650000  |
| 1  | 0.027197000  | 3.632912000  | -0.728802000 |
| 6  | -4.759386000 | -0.895093000 | -0.384301000 |
| 1  | -5.545759000 | -0.217447000 | -0.028115000 |
| 1  | -5.094873000 | -1.312961000 | -1.340309000 |
| 1  | -4.694798000 | -1.716152000 | 0.334804000  |

|   |              |              |              |
|---|--------------|--------------|--------------|
| 6 | -3.583682000 | 1.066905000  | -1.430564000 |
| 1 | -2.623122000 | 1.574834000  | -1.560032000 |
| 1 | -3.957282000 | 0.791717000  | -2.423657000 |
| 1 | -4.287413000 | 1.785959000  | -0.996119000 |
| 6 | -0.196794000 | 4.589283000  | 1.180619000  |
| 1 | 0.071766000  | 4.448124000  | 2.233392000  |
| 1 | 0.238614000  | 5.548077000  | 0.868817000  |
| 1 | -1.285468000 | 4.685544000  | 1.127837000  |
| 6 | 1.816641000  | 3.288572000  | 0.383154000  |
| 1 | 2.324507000  | 4.158939000  | -0.051622000 |
| 1 | 2.169745000  | 3.193309000  | 1.416432000  |
| 1 | 2.138219000  | 2.398317000  | -0.167626000 |
| 6 | 3.898283000  | 0.142315000  | -1.359375000 |
| 1 | 4.710299000  | 0.790660000  | -1.008490000 |
| 1 | 4.290314000  | -0.462151000 | -2.185479000 |
| 1 | 3.107356000  | 0.778510000  | -1.761356000 |
| 6 | 4.483114000  | -1.665279000 | 0.280553000  |
| 1 | 5.395357000  | -1.095937000 | 0.500608000  |
| 1 | 4.200147000  | -2.183236000 | 1.200526000  |
| 1 | 4.745967000  | -2.423654000 | -0.466155000 |
| 7 | 1.077897000  | 1.890924000  | -3.034751000 |
| 7 | 0.701406000  | 1.143228000  | -2.228495000 |

[2f<sub>SB</sub>]<sup>-</sup> (TE = -3128.706615)

|    |              |              |              |
|----|--------------|--------------|--------------|
| 6  | -0.970819000 | 2.127480000  | -1.834898000 |
| 6  | -0.629475000 | 0.849984000  | -2.575412000 |
| 6  | 2.617621000  | 1.353983000  | -1.040856000 |
| 6  | 2.004145000  | 0.491534000  | -2.127735000 |
| 6  | -0.920804000 | -2.311955000 | -1.903664000 |
| 6  | 0.355964000  | -1.634410000 | -2.350952000 |
| 1  | 2.057635000  | 2.287186000  | -0.900271000 |
| 1  | 2.023875000  | 1.103161000  | -3.054047000 |
| 1  | -1.006198000 | -3.373716000 | -2.174349000 |
| 1  | 0.373858000  | -1.714835000 | -3.462323000 |
| 1  | -1.750246000 | 2.746116000  | -2.304322000 |
| 1  | -1.576597000 | 0.306888000  | -2.744277000 |
| 6  | -1.584925000 | 3.154050000  | 0.793019000  |
| 1  | -2.079373000 | 2.837592000  | 1.721360000  |
| 6  | 3.365385000  | -1.039975000 | 0.294200000  |
| 1  | 2.806766000  | -1.512035000 | -0.523273000 |
| 6  | -2.913943000 | -2.060543000 | 0.077882000  |
| 1  | -3.196390000 | -1.229942000 | -0.584571000 |
| 23 | 0.069130000  | -0.090106000 | 0.634955000  |
| 16 | 2.467787000  | 0.559542000  | 0.612821000  |
| 16 | -1.565163000 | 1.569447000  | -0.178676000 |
| 16 | -1.056496000 | -2.168659000 | -0.058516000 |



|   |              |              |              |
|---|--------------|--------------|--------------|
| 1 | -0.081400000 | 2.755003000  | -1.682222000 |
| 1 | -0.292712000 | 1.149290000  | -3.591900000 |
| 1 | 1.212449000  | -2.244999000 | -2.016529000 |
| 1 | -1.803903000 | -1.796039000 | -2.303951000 |
| 1 | 2.709132000  | -0.332463000 | -2.339455000 |
| 1 | 3.670484000  | 1.638644000  | -1.197682000 |
| 6 | -3.570885000 | -3.344851000 | -0.387606000 |
| 1 | -4.664715000 | -3.270465000 | -0.330789000 |
| 1 | -3.313383000 | -3.588315000 | -1.422169000 |
| 1 | -3.263358000 | -4.190776000 | 0.237195000  |
| 6 | -3.273652000 | -1.710273000 | 1.506723000  |
| 1 | -2.928653000 | -2.480522000 | 2.206464000  |
| 1 | -2.820895000 | -0.762759000 | 1.813207000  |
| 1 | -4.360539000 | -1.622797000 | 1.621166000  |
| 6 | 4.805318000  | -0.800213000 | -0.110570000 |
| 1 | 5.324189000  | -1.752323000 | -0.276748000 |
| 1 | 4.881890000  | -0.225001000 | -1.037715000 |
| 1 | 5.353198000  | -0.256595000 | 0.667455000  |
| 6 | 3.239757000  | -1.894094000 | 1.539559000  |
| 1 | 3.701748000  | -1.412929000 | 2.409677000  |
| 1 | 2.189245000  | -2.086953000 | 1.780277000  |
| 1 | 3.735863000  | -2.860155000 | 1.391992000  |
| 6 | -0.186117000 | 3.637870000  | 1.122484000  |
| 1 | 0.394744000  | 2.859789000  | 1.628472000  |
| 1 | 0.362698000  | 3.924449000  | 0.218187000  |
| 1 | -0.219798000 | 4.520071000  | 1.773931000  |
| 6 | -2.423374000 | 4.220498000  | 0.112965000  |
| 1 | -3.420578000 | 3.853800000  | -0.147150000 |
| 1 | -2.545270000 | 5.095826000  | 0.763084000  |
| 1 | -1.948362000 | 4.570679000  | -0.809444000 |
| 5 | 0.493965000  | -0.091485000 | -1.841052000 |
| 7 | -0.083268000 | -0.507456000 | 3.752238000  |
| 7 | -0.003651000 | -0.350374000 | 2.615063000  |

[2a''<sub>pc</sub>]- (TE = -3519.417033)

|   |              |              |             |
|---|--------------|--------------|-------------|
| 6 | 0.291437000  | 1.522399000  | 1.657832000 |
| 6 | 0.961190000  | 1.807488000  | 2.859168000 |
| 1 | 1.234391000  | 0.982411000  | 3.515113000 |
| 6 | 1.294015000  | 3.108748000  | 3.236957000 |
| 1 | 1.828276000  | 3.281259000  | 4.170876000 |
| 6 | 0.929767000  | 4.182210000  | 2.433064000 |
| 1 | 1.179364000  | 5.202446000  | 2.721233000 |
| 6 | 0.249049000  | 3.931861000  | 1.243070000 |
| 1 | -0.026780000 | 4.767495000  | 0.597679000 |
| 6 | -0.038002000 | 2.623557000  | 0.831650000 |
| 6 | -1.486140000 | -0.232846000 | 1.788309000 |

|    |              |              |              |
|----|--------------|--------------|--------------|
| 6  | -2.034638000 | 0.367942000  | 2.934099000  |
| 1  | -1.468773000 | 1.148954000  | 3.438840000  |
| 6  | -3.279094000 | -0.001532000 | 3.444303000  |
| 1  | -3.675280000 | 0.508339000  | 4.322343000  |
| 6  | -3.997018000 | -1.034123000 | 2.855620000  |
| 1  | -4.961264000 | -1.342072000 | 3.257280000  |
| 6  | -3.468431000 | -1.664062000 | 1.727937000  |
| 1  | -4.028078000 | -2.472751000 | 1.262054000  |
| 6  | -2.258016000 | -1.248689000 | 1.162576000  |
| 6  | 0.917251000  | -0.867372000 | 1.813420000  |
| 6  | 0.725818000  | -1.535070000 | 3.036150000  |
| 1  | -0.215581000 | -1.395416000 | 3.565115000  |
| 6  | 1.698641000  | -2.351567000 | 3.602490000  |
| 1  | 1.502244000  | -2.848323000 | 4.552378000  |
| 6  | 2.925990000  | -2.511699000 | 2.968669000  |
| 1  | 3.702754000  | -3.136713000 | 3.406418000  |
| 6  | 3.139997000  | -1.877888000 | 1.747801000  |
| 1  | 4.087536000  | -2.033113000 | 1.240144000  |
| 6  | 2.149162000  | -1.095756000 | 1.138725000  |
| 23 | -0.072321000 | -0.064554000 | -1.093680000 |
| 6  | -2.396327000 | 3.183479000  | -0.626829000 |
| 1  | -2.115765000 | 4.198018000  | -0.299381000 |
| 6  | -1.300831000 | -3.581117000 | -0.380113000 |
| 1  | -2.218032000 | -4.088315000 | -0.044157000 |
| 6  | 3.780403000  | 0.732657000  | -0.506815000 |
| 1  | 3.758677000  | 1.209232000  | -1.499079000 |
| 6  | 5.158662000  | 0.112091000  | -0.314259000 |
| 1  | 5.931599000  | 0.891124000  | -0.355449000 |
| 1  | 5.252864000  | -0.365884000 | 0.665763000  |
| 1  | 5.413741000  | -0.629030000 | -1.073900000 |
| 6  | 3.555619000  | 1.806130000  | 0.548359000  |
| 1  | 3.608705000  | 1.379867000  | 1.556681000  |
| 1  | 4.323658000  | 2.587123000  | 0.481075000  |
| 1  | 2.579385000  | 2.284680000  | 0.459720000  |
| 6  | -3.175239000 | 3.309745000  | -1.927248000 |
| 1  | -2.666743000 | 3.943831000  | -2.658956000 |
| 1  | -3.346131000 | 2.337202000  | -2.401594000 |
| 1  | -4.161893000 | 3.755132000  | -1.747043000 |
| 6  | -3.226214000 | 2.542874000  | 0.473649000  |
| 1  | -2.727642000 | 2.605272000  | 1.444609000  |
| 1  | -4.203596000 | 3.033075000  | 0.567267000  |
| 1  | -3.405455000 | 1.479218000  | 0.285036000  |
| 6  | -0.899380000 | -4.107597000 | -1.752265000 |
| 1  | -0.666335000 | -5.178681000 | -1.711453000 |
| 1  | -1.670861000 | -3.968343000 | -2.515620000 |
| 1  | -0.002116000 | -3.590839000 | -2.113062000 |

|    |              |              |              |
|----|--------------|--------------|--------------|
| 6  | -0.205749000 | -3.859725000 | 0.634486000  |
| 1  | 0.728802000  | -3.356863000 | 0.359775000  |
| 1  | -0.470196000 | -3.514167000 | 1.637068000  |
| 1  | 0.003212000  | -4.935349000 | 0.693667000  |
| 6  | -0.104061000 | 0.109418000  | 1.273297000  |
| 7  | 0.005301000  | -1.053732000 | -4.027292000 |
| 7  | 0.000501000  | -0.651482000 | -2.941889000 |
| 6  | 0.074736000  | 3.481270000  | -2.018694000 |
| 1  | -0.421044000 | 4.459531000  | -1.903825000 |
| 6  | -0.141425000 | 2.964503000  | -3.441525000 |
| 1  | 0.172593000  | 3.710741000  | -4.182344000 |
| 1  | 0.457562000  | 2.061948000  | -3.606280000 |
| 1  | -1.177162000 | 2.692018000  | -3.660383000 |
| 6  | 1.568813000  | 3.644645000  | -1.789635000 |
| 1  | 1.813814000  | 4.087808000  | -0.821819000 |
| 1  | 2.064365000  | 2.667617000  | -1.838858000 |
| 1  | 2.012749000  | 4.274857000  | -2.570716000 |
| 6  | 2.861780000  | -1.827924000 | -1.703207000 |
| 1  | 1.890177000  | -2.290308000 | -1.926835000 |
| 6  | 3.770546000  | -2.948871000 | -1.218463000 |
| 1  | 3.915917000  | -3.682059000 | -2.023411000 |
| 1  | 4.766326000  | -2.608676000 | -0.918357000 |
| 1  | 3.338117000  | -3.487071000 | -0.370965000 |
| 6  | 3.351802000  | -1.207052000 | -3.007898000 |
| 1  | 4.359150000  | -0.786040000 | -2.916502000 |
| 1  | 3.386280000  | -1.957707000 | -3.806218000 |
| 1  | 2.682681000  | -0.409566000 | -3.348278000 |
| 6  | -3.218615000 | -1.838027000 | -1.624117000 |
| 1  | -2.735005000 | -1.932357000 | -2.608900000 |
| 6  | -3.957002000 | -0.510385000 | -1.611502000 |
| 1  | -4.715214000 | -0.468192000 | -2.403187000 |
| 1  | -4.469339000 | -0.347040000 | -0.655844000 |
| 1  | -3.263542000 | 0.322425000  | -1.758291000 |
| 6  | -4.195458000 | -2.998875000 | -1.478926000 |
| 1  | -4.940962000 | -2.963531000 | -2.283824000 |
| 1  | -3.717153000 | -3.979871000 | -1.536446000 |
| 1  | -4.754661000 | -2.959030000 | -0.539361000 |
| 15 | 2.283976000  | -0.424200000 | -0.562868000 |
| 15 | -0.741806000 | 2.268612000  | -0.812881000 |
| 15 | -1.694557000 | -1.744954000 | -0.505698000 |

[2b''<sub>psi</sub>] (TE = -3770.830125)

|   |             |             |             |
|---|-------------|-------------|-------------|
| 6 | 0.513745000 | 1.893861000 | 1.718901000 |
| 6 | 1.042772000 | 2.272359000 | 2.958391000 |

|    |              |              |              |
|----|--------------|--------------|--------------|
| 1  | 1.230981000  | 1.510440000  | 3.716825000  |
| 6  | 1.368245000  | 3.601189000  | 3.236577000  |
| 1  | 1.807090000  | 3.870083000  | 4.197227000  |
| 6  | 1.118665000  | 4.583837000  | 2.286368000  |
| 1  | 1.352972000  | 5.626006000  | 2.500099000  |
| 6  | 0.565194000  | 4.234407000  | 1.052507000  |
| 1  | 0.342159000  | 5.018853000  | 0.334325000  |
| 6  | 0.299370000  | 2.894853000  | 0.749297000  |
| 6  | -1.505093000 | -0.358788000 | 2.129215000  |
| 6  | -1.820356000 | 0.003859000  | 3.444981000  |
| 1  | -1.103098000 | 0.586661000  | 4.026104000  |
| 6  | -3.043637000 | -0.329519000 | 4.024016000  |
| 1  | -3.278231000 | -0.008627000 | 5.038852000  |
| 6  | -3.963775000 | -1.080790000 | 3.300510000  |
| 1  | -4.918952000 | -1.356633000 | 3.745865000  |
| 6  | -3.662565000 | -1.477936000 | 1.998304000  |
| 1  | -4.381383000 | -2.086499000 | 1.456163000  |
| 6  | -2.460744000 | -1.093766000 | 1.394571000  |
| 6  | 1.481046000  | -0.975539000 | 1.848959000  |
| 6  | 1.626539000  | -1.327300000 | 3.195846000  |
| 1  | 0.859529000  | -1.020596000 | 3.909970000  |
| 6  | 2.716632000  | -2.066160000 | 3.648572000  |
| 1  | 2.809549000  | -2.329765000 | 4.701913000  |
| 6  | 3.693739000  | -2.453267000 | 2.739272000  |
| 1  | 4.563913000  | -3.017053000 | 3.073764000  |
| 6  | 3.562169000  | -2.127227000 | 1.390562000  |
| 1  | 4.346218000  | -2.444248000 | 0.714868000  |
| 6  | 2.450886000  | -1.413172000 | 0.918445000  |
| 23 | -0.168653000 | -0.114167000 | -1.256468000 |
| 6  | -2.081343000 | 3.146146000  | -0.722524000 |
| 1  | -1.887928000 | 4.186619000  | -0.420597000 |
| 6  | -1.691437000 | -3.347838000 | -0.162387000 |
| 1  | -2.542627000 | -3.741223000 | 0.414273000  |
| 6  | 3.618547000  | 0.335879000  | -1.071516000 |
| 1  | 3.405785000  | 0.786228000  | -2.051034000 |
| 6  | 5.031786000  | -0.228326000 | -1.124131000 |
| 1  | 5.752144000  | 0.587197000  | -1.271499000 |
| 1  | 5.311563000  | -0.722861000 | -0.188181000 |
| 1  | 5.186114000  | -0.935723000 | -1.942296000 |
| 6  | 3.538923000  | 1.425804000  | -0.015242000 |
| 1  | 3.766206000  | 1.030015000  | 0.981920000  |
| 1  | 4.260813000  | 2.226490000  | -0.221071000 |
| 1  | 2.544516000  | 1.870453000  | 0.037536000  |
| 6  | -2.813822000 | 3.152927000  | -2.058863000 |
| 1  | -2.436865000 | 3.928869000  | -2.732409000 |
| 1  | -2.708872000 | 2.199073000  | -2.588914000 |

|    |              |              |              |
|----|--------------|--------------|--------------|
| 1  | -3.888352000 | 3.330306000  | -1.927582000 |
| 6  | -2.878884000 | 2.482328000  | 0.389654000  |
| 1  | -2.393721000 | 2.603986000  | 1.363884000  |
| 1  | -3.888100000 | 2.906810000  | 0.463065000  |
| 1  | -2.977247000 | 1.405567000  | 0.225238000  |
| 6  | -1.638982000 | -4.037356000 | -1.520207000 |
| 1  | -1.223821000 | -5.049320000 | -1.434519000 |
| 1  | -2.623805000 | -4.129978000 | -1.986344000 |
| 1  | -1.003622000 | -3.484904000 | -2.219975000 |
| 6  | -0.427635000 | -3.603384000 | 0.642822000  |
| 1  | 0.459929000  | -3.227785000 | 0.123655000  |
| 1  | -0.449400000 | -3.111139000 | 1.620679000  |
| 1  | -0.285184000 | -4.678083000 | 0.813137000  |
| 7  | -0.996698000 | -0.697173000 | -4.196581000 |
| 7  | -0.616993000 | -0.488664000 | -3.127534000 |
| 14 | 0.080770000  | 0.120236000  | 1.152556000  |
| 6  | 0.305079000  | 3.366844000  | -2.278286000 |
| 1  | -0.354572000 | 3.020223000  | -3.089378000 |
| 6  | 2.834990000  | -2.293677000 | -2.011071000 |
| 1  | 3.313584000  | -1.695537000 | -2.803391000 |
| 6  | -3.597893000 | -1.600525000 | -1.378877000 |
| 1  | -3.164776000 | -1.901539000 | -2.344930000 |
| 6  | -4.225025000 | -0.232797000 | -1.583794000 |
| 1  | -3.491230000 | 0.494370000  | -1.933933000 |
| 1  | -5.034139000 | -0.277960000 | -2.323639000 |
| 1  | -4.658138000 | 0.154801000  | -0.653759000 |
| 6  | -4.683016000 | -2.616501000 | -1.024747000 |
| 1  | -5.295584000 | -2.831960000 | -1.909751000 |
| 1  | -4.303746000 | -3.574888000 | -0.661512000 |
| 1  | -5.370692000 | -2.228023000 | -0.267670000 |
| 6  | 3.840617000  | -3.327756000 | -1.516333000 |
| 1  | 3.418682000  | -3.936567000 | -0.709394000 |
| 1  | 4.091949000  | -4.019571000 | -2.331851000 |
| 1  | 4.781813000  | -2.907788000 | -1.158121000 |
| 6  | 1.678831000  | -3.045387000 | -2.654096000 |
| 1  | 1.201221000  | -3.720405000 | -1.936307000 |
| 1  | 0.908191000  | -2.375920000 | -3.037538000 |
| 1  | 2.037490000  | -3.666837000 | -3.484917000 |
| 6  | 1.716459000  | 2.946211000  | -2.651835000 |
| 1  | 1.776642000  | 1.865373000  | -2.808681000 |
| 1  | 2.042905000  | 3.441747000  | -3.574988000 |
| 1  | 2.436681000  | 3.210301000  | -1.869238000 |
| 6  | 0.205721000  | 4.887078000  | -2.219638000 |
| 1  | 0.327058000  | 5.313438000  | -3.223999000 |
| 1  | -0.749081000 | 5.254394000  | -1.832222000 |
| 1  | 1.000793000  | 5.318885000  | -1.604300000 |

|    |              |              |              |
|----|--------------|--------------|--------------|
| 15 | -0.387132000 | 2.303560000  | -0.862761000 |
| 15 | -1.998345000 | -1.491299000 | -0.363650000 |
| 15 | 2.173895000  | -0.889978000 | -0.862188000 |

[2c''<sub>PB</sub>] (TE = -3506.200645)

|    |              |              |              |
|----|--------------|--------------|--------------|
| 6  | 1.328295000  | -0.732256000 | 1.812405000  |
| 6  | 1.385192000  | -1.604260000 | 2.920869000  |
| 1  | 0.447222000  | -1.909119000 | 3.388658000  |
| 6  | 2.580653000  | -2.078588000 | 3.449852000  |
| 1  | 2.568753000  | -2.750705000 | 4.308807000  |
| 6  | 3.797044000  | -1.677574000 | 2.898461000  |
| 1  | 4.740335000  | -2.031029000 | 3.312463000  |
| 6  | 3.785607000  | -0.839217000 | 1.786885000  |
| 1  | 4.734649000  | -0.556635000 | 1.333710000  |
| 6  | 2.580216000  | -0.402743000 | 1.227221000  |
| 6  | -0.344089000 | 1.362555000  | 1.869792000  |
| 6  | 0.152912000  | 1.805599000  | 3.112698000  |
| 1  | 0.868577000  | 1.171008000  | 3.639995000  |
| 6  | -0.244975000 | 3.001181000  | 3.700154000  |
| 1  | 0.167744000  | 3.299434000  | 4.664847000  |
| 6  | -1.195112000 | 3.809105000  | 3.073888000  |
| 1  | -1.526292000 | 4.738471000  | 3.534960000  |
| 6  | -1.700154000 | 3.416561000  | 1.837022000  |
| 1  | -2.426843000 | 4.054975000  | 1.334922000  |
| 6  | -1.257915000 | 2.240006000  | 1.222821000  |
| 6  | -1.297707000 | -1.064016000 | 1.621917000  |
| 6  | -2.070402000 | -0.914505000 | 2.792665000  |
| 1  | -1.831138000 | -0.091519000 | 3.469216000  |
| 6  | -3.130011000 | -1.755504000 | 3.109797000  |
| 1  | -3.702777000 | -1.593789000 | 4.023894000  |
| 6  | -3.466313000 | -2.803931000 | 2.254320000  |
| 1  | -4.305793000 | -3.459873000 | 2.481164000  |
| 6  | -2.722261000 | -2.992283000 | 1.093945000  |
| 1  | -3.006766000 | -3.797938000 | 0.419633000  |
| 6  | -1.658317000 | -2.139860000 | 0.774984000  |
| 23 | 0.106691000  | 0.137358000  | -1.150210000 |
| 6  | 3.298286000  | 2.090075000  | -0.167605000 |
| 1  | 4.328630000  | 1.890412000  | 0.163046000  |
| 6  | -3.496052000 | 1.497441000  | -0.612890000 |
| 1  | -3.968505000 | 2.458055000  | -0.364058000 |
| 6  | 0.378453000  | -3.720565000 | -0.727085000 |
| 1  | 0.164314000  | -4.272883000 | -1.651878000 |
| 6  | 0.085792000  | -4.628242000 | 0.458654000  |
| 1  | 0.742247000  | -5.507751000 | 0.442442000  |
| 1  | 0.260023000  | -4.106001000 | 1.405646000  |
| 1  | -0.946559000 | -4.986671000 | 0.480697000  |

|    |              |              |              |
|----|--------------|--------------|--------------|
| 6  | 1.849497000  | -3.342024000 | -0.757139000 |
| 1  | 2.135700000  | -2.759260000 | 0.123862000  |
| 1  | 2.481564000  | -4.239361000 | -0.779760000 |
| 1  | 2.089072000  | -2.741537000 | -1.638545000 |
| 6  | 3.345870000  | 2.850746000  | -1.487931000 |
| 1  | 3.984774000  | 2.368535000  | -2.232566000 |
| 1  | 2.352811000  | 2.933483000  | -1.939904000 |
| 1  | 3.725211000  | 3.870148000  | -1.344722000 |
| 6  | 2.602346000  | 2.889162000  | 0.922213000  |
| 1  | 2.642237000  | 2.376815000  | 1.887365000  |
| 1  | 3.071827000  | 3.873743000  | 1.042480000  |
| 1  | 1.543295000  | 3.050991000  | 0.702176000  |
| 6  | -3.848847000 | 1.116324000  | -2.045659000 |
| 1  | -4.932918000 | 1.007443000  | -2.174250000 |
| 1  | -3.500491000 | 1.843087000  | -2.787077000 |
| 1  | -3.388927000 | 0.154645000  | -2.304513000 |
| 6  | -4.018665000 | 0.458881000  | 0.360964000  |
| 1  | -3.601123000 | -0.532262000 | 0.161423000  |
| 1  | -3.776080000 | 0.703041000  | 1.397766000  |
| 1  | -5.110282000 | 0.377356000  | 0.281040000  |
| 5  | -0.050011000 | -0.103015000 | 1.281428000  |
| 15 | 2.477345000  | 0.416404000  | -0.405978000 |
| 15 | -1.640976000 | 1.780426000  | -0.503329000 |
| 15 | -0.745150000 | -2.186121000 | -0.813021000 |
| 6  | -1.555269000 | 3.389538000  | -1.518683000 |
| 1  | -1.473565000 | 2.998240000  | -2.543862000 |
| 6  | -0.265659000 | 4.136228000  | -1.219385000 |
| 1  | -0.101841000 | 4.946004000  | -1.940732000 |
| 1  | -0.279531000 | 4.582112000  | -0.218505000 |
| 1  | 0.597747000  | 3.470726000  | -1.263282000 |
| 6  | -2.737856000 | 4.352225000  | -1.494442000 |
| 1  | -2.528756000 | 5.213468000  | -2.142007000 |
| 1  | -3.668153000 | 3.907163000  | -1.855926000 |
| 1  | -2.932997000 | 4.755826000  | -0.496024000 |
| 6  | 3.819794000  | -0.483355000 | -1.421206000 |
| 1  | 3.782418000  | -1.496743000 | -1.000939000 |
| 6  | 5.263727000  | -0.002297000 | -1.315781000 |
| 1  | 5.929849000  | -0.695895000 | -1.844785000 |
| 1  | 5.411866000  | 0.979515000  | -1.775620000 |
| 1  | 5.630316000  | 0.065816000  | -0.289028000 |
| 6  | 3.406878000  | -0.566823000 | -2.886787000 |
| 1  | 4.100671000  | -1.197922000 | -3.456761000 |
| 1  | 2.398705000  | -0.977827000 | -3.005550000 |
| 1  | 3.399373000  | 0.419031000  | -3.366321000 |
| 6  | -2.063698000 | -2.781161000 | -2.044818000 |
| 1  | -2.976241000 | -2.292270000 | -1.669106000 |

|   |              |              |              |
|---|--------------|--------------|--------------|
| 6 | -1.753391000 | -2.221426000 | -3.428730000 |
| 1 | -0.779462000 | -2.575798000 | -3.792658000 |
| 1 | -2.506183000 | -2.535009000 | -4.163210000 |
| 1 | -1.710058000 | -1.129403000 | -3.430948000 |
| 6 | -2.329884000 | -4.280172000 | -2.156176000 |
| 1 | -1.531277000 | -4.790044000 | -2.705723000 |
| 1 | -2.429761000 | -4.789685000 | -1.195160000 |
| 1 | -3.254365000 | -4.464240000 | -2.717729000 |
| 7 | 0.260839000  | 1.181803000  | -4.113701000 |
| 7 | 0.210693000  | 0.769321000  | -3.047683000 |

[2d''<sub>sc</sub>] (TE = -3334.561521)

|    |              |              |              |
|----|--------------|--------------|--------------|
| 6  | -0.328528000 | 1.641678000  | -0.996735000 |
| 6  | -1.108499000 | 2.144396000  | -2.052169000 |
| 1  | -1.582014000 | 1.432772000  | -2.727962000 |
| 6  | -1.290846000 | 3.509086000  | -2.269777000 |
| 1  | -1.914135000 | 3.847309000  | -3.096718000 |
| 6  | -0.674181000 | 4.435072000  | -1.434220000 |
| 1  | -0.808527000 | 5.503891000  | -1.592008000 |
| 6  | 0.086577000  | 3.976391000  | -0.363255000 |
| 1  | 0.528701000  | 4.684066000  | 0.336930000  |
| 6  | 0.242784000  | 2.605079000  | -0.134635000 |
| 6  | 1.180455000  | -0.248767000 | -1.555762000 |
| 6  | 1.575483000  | 0.353328000  | -2.760343000 |
| 1  | 0.966917000  | 1.160794000  | -3.164448000 |
| 6  | 2.720202000  | -0.037661000 | -3.459325000 |
| 1  | 2.994800000  | 0.476427000  | -4.379554000 |
| 6  | 3.501236000  | -1.084307000 | -2.980218000 |
| 1  | 4.396885000  | -1.398668000 | -3.514508000 |
| 6  | 3.140718000  | -1.708719000 | -1.790132000 |
| 1  | 3.765159000  | -2.500064000 | -1.376260000 |
| 6  | 2.011979000  | -1.287405000 | -1.074568000 |
| 6  | -1.259748000 | -0.651193000 | -1.281589000 |
| 6  | -1.331447000 | -1.184092000 | -2.582454000 |
| 1  | -0.499821000 | -1.001974000 | -3.260180000 |
| 6  | -2.407061000 | -1.945630000 | -3.030767000 |
| 1  | -2.400698000 | -2.343103000 | -4.045187000 |
| 6  | -3.479921000 | -2.201658000 | -2.185938000 |
| 1  | -4.319754000 | -2.810609000 | -2.515507000 |
| 6  | -3.446743000 | -1.697139000 | -0.889083000 |
| 1  | -4.245959000 | -1.937876000 | -0.191293000 |
| 6  | -2.362925000 | -0.936695000 | -0.438730000 |
| 16 | -2.237586000 | -0.613100000 | 1.325756000  |
| 16 | 0.921204000  | 2.073536000  | 1.434653000  |
| 16 | 1.823170000  | -1.794842000 | 0.638790000  |
| 23 | 0.194566000  | -0.264622000 | 1.447908000  |



|   |              |              |              |
|---|--------------|--------------|--------------|
| 6 | 2.765705000  | 2.463911000  | 1.272224000  |
| 1 | 2.816865000  | 3.560844000  | 1.256852000  |
| 6 | 1.275719000  | -3.609881000 | 0.449009000  |
| 1 | 2.149781000  | -4.121129000 | 0.023686000  |
| 6 | -3.434026000 | 0.821252000  | 1.656634000  |
| 1 | -3.404814000 | 0.821060000  | 2.754288000  |
| 6 | -4.833277000 | 0.492018000  | 1.183968000  |
| 1 | -5.540227000 | 1.263544000  | 1.513834000  |
| 1 | -4.883250000 | 0.455477000  | 0.090767000  |
| 1 | -5.185669000 | -0.469641000 | 1.568663000  |
| 6 | -2.937743000 | 2.145568000  | 1.131686000  |
| 1 | -2.889403000 | 2.151102000  | 0.038293000  |
| 1 | -3.611284000 | 2.956895000  | 1.437086000  |
| 1 | -1.938636000 | 2.378495000  | 1.507484000  |
| 6 | 3.410553000  | 1.922309000  | 2.530510000  |
| 1 | 2.964480000  | 2.338160000  | 3.439098000  |
| 1 | 3.302505000  | 0.831886000  | 2.579058000  |
| 1 | 4.482101000  | 2.150671000  | 2.545558000  |
| 6 | 3.363940000  | 1.883259000  | 0.015436000  |
| 1 | 2.864725000  | 2.246708000  | -0.887180000 |
| 1 | 4.427544000  | 2.143126000  | -0.059485000 |
| 1 | 3.285322000  | 0.791342000  | 0.016279000  |
| 6 | 0.994653000  | -4.100628000 | 1.851839000  |
| 1 | 0.695020000  | -5.155073000 | 1.844293000  |
| 1 | 1.861881000  | -3.999174000 | 2.511655000  |
| 1 | 0.177151000  | -3.520837000 | 2.297688000  |
| 6 | 0.080680000  | -3.747403000 | -0.462205000 |
| 1 | -0.786095000 | -3.218766000 | -0.049200000 |
| 1 | 0.270644000  | -3.337083000 | -1.457935000 |
| 1 | -0.198651000 | -4.802402000 | -0.580969000 |
| 6 | -0.078664000 | 0.162969000  | -0.807742000 |
| 7 | 0.427729000  | -1.163826000 | 4.419646000  |
| 7 | 0.345467000  | -0.812204000 | 3.322908000  |

[2e''<sub>ssi</sub>]- (TE = -3585.974105)

|   |              |              |              |
|---|--------------|--------------|--------------|
| 6 | 0.303205000  | 2.204254000  | 0.834717000  |
| 6 | 0.726829000  | 3.008497000  | 1.905222000  |
| 1 | 0.992199000  | 2.538226000  | 2.853433000  |
| 6 | 0.829664000  | 4.394202000  | 1.791267000  |
| 1 | 1.173064000  | 4.988732000  | 2.637393000  |
| 6 | 0.500023000  | 5.018838000  | 0.592321000  |
| 1 | 0.585828000  | 6.099650000  | 0.492068000  |
| 6 | 0.079459000  | 4.249822000  | -0.493281000 |
| 1 | -0.161933000 | 4.725304000  | -1.443242000 |
| 6 | -0.009914000 | 2.864267000  | -0.364297000 |
| 6 | -1.288184000 | -0.163276000 | 1.986012000  |

|    |              |              |              |
|----|--------------|--------------|--------------|
| 6  | -1.475100000 | 0.246942000  | 3.314641000  |
| 1  | -0.717495000 | 0.868134000  | 3.795748000  |
| 6  | -2.611734000 | -0.100841000 | 4.042980000  |
| 1  | -2.738803000 | 0.253631000  | 5.065403000  |
| 6  | -3.592689000 | -0.893313000 | 3.452031000  |
| 1  | -4.491001000 | -1.161071000 | 4.007073000  |
| 6  | -3.431341000 | -1.328869000 | 2.139172000  |
| 1  | -4.203057000 | -1.937879000 | 1.668639000  |
| 6  | -2.292509000 | -0.962861000 | 1.418796000  |
| 6  | 1.751370000  | -0.451809000 | 1.529794000  |
| 6  | 2.164859000  | -0.427725000 | 2.870460000  |
| 1  | 1.564729000  | 0.113360000  | 3.603583000  |
| 6  | 3.309620000  | -1.090323000 | 3.307188000  |
| 1  | 3.594736000  | -1.056204000 | 4.358288000  |
| 6  | 4.075089000  | -1.818835000 | 2.401220000  |
| 1  | 4.958976000  | -2.359904000 | 2.735322000  |
| 6  | 3.691556000  | -1.871842000 | 1.063312000  |
| 1  | 4.260580000  | -2.470168000 | 0.353640000  |
| 6  | 2.556358000  | -1.181362000 | 0.634898000  |
| 16 | 2.082210000  | -1.313985000 | -1.120623000 |
| 16 | -0.488512000 | 1.893567000  | -1.820009000 |
| 16 | -2.182482000 | -1.423323000 | -0.355355000 |
| 23 | -0.247367000 | -0.533604000 | -1.464231000 |
| 6  | -2.286282000 | 2.491675000  | -1.959703000 |
| 1  | -2.213637000 | 3.558615000  | -2.208335000 |
| 6  | -2.146141000 | -3.303117000 | -0.079107000 |
| 1  | -3.029457000 | -3.524306000 | 0.533002000  |
| 6  | 3.326499000  | -0.117792000 | -1.888975000 |
| 1  | 2.902564000  | -0.039848000 | -2.898704000 |
| 6  | 4.719710000  | -0.708530000 | -1.956907000 |
| 1  | 5.376101000  | -0.071971000 | -2.563614000 |
| 1  | 5.170880000  | -0.773626000 | -0.961516000 |
| 1  | 4.723249000  | -1.709895000 | -2.396327000 |
| 6  | 3.303375000  | 1.235937000  | -1.216097000 |
| 1  | 3.674342000  | 1.177386000  | -0.186452000 |
| 1  | 3.943038000  | 1.944258000  | -1.756504000 |
| 1  | 2.292744000  | 1.649211000  | -1.178783000 |
| 6  | -2.898011000 | 1.718585000  | -3.107933000 |
| 1  | -2.335833000 | 1.844363000  | -4.038393000 |
| 1  | -2.922522000 | 0.646405000  | -2.879412000 |
| 1  | -3.928462000 | 2.045307000  | -3.288146000 |
| 6  | -3.034617000 | 2.291141000  | -0.662258000 |
| 1  | -2.617918000 | 2.884014000  | 0.156908000  |
| 1  | -4.088231000 | 2.573506000  | -0.778740000 |
| 1  | -3.002154000 | 1.238937000  | -0.358706000 |
| 6  | -2.263876000 | -3.951560000 | -1.439698000 |

|    |              |              |              |
|----|--------------|--------------|--------------|
| 1  | -2.269390000 | -5.044196000 | -1.349776000 |
| 1  | -3.175113000 | -3.649508000 | -1.964869000 |
| 1  | -1.414177000 | -3.673540000 | -2.071691000 |
| 6  | -0.882536000 | -3.710355000 | 0.645854000  |
| 1  | 0.000506000  | -3.470163000 | 0.041256000  |
| 1  | -0.772349000 | -3.196960000 | 1.606645000  |
| 1  | -0.872946000 | -4.790736000 | 0.838456000  |
| 7  | -0.449785000 | -2.024423000 | -4.194013000 |
| 7  | -0.393536000 | -1.472456000 | -3.182953000 |
| 14 | 0.143291000  | 0.298667000  | 0.789889000  |

$[2f''_{SB}]^{\cdot}$  (TE = -3321.343122)

|    |              |              |              |
|----|--------------|--------------|--------------|
| 6  | -1.163412000 | -0.481431000 | 1.880344000  |
| 6  | -1.934155000 | 0.027983000  | 2.940760000  |
| 1  | -1.655388000 | 0.997524000  | 3.357366000  |
| 6  | -3.032302000 | -0.648099000 | 3.465518000  |
| 1  | -3.605337000 | -0.209547000 | 4.282307000  |
| 6  | -3.389398000 | -1.895066000 | 2.957796000  |
| 1  | -4.238742000 | -2.440202000 | 3.366502000  |
| 6  | -2.659165000 | -2.439183000 | 1.900873000  |
| 1  | -2.947286000 | -3.406754000 | 1.494527000  |
| 6  | -1.599014000 | -1.716801000 | 1.359290000  |
| 6  | 1.512060000  | -0.393768000 | 1.629796000  |
| 6  | 1.741981000  | -1.255315000 | 2.724736000  |
| 1  | 0.882761000  | -1.564552000 | 3.322231000  |
| 6  | 3.009713000  | -1.702988000 | 3.079667000  |
| 1  | 3.130919000  | -2.372265000 | 3.931675000  |
| 6  | 4.130779000  | -1.266721000 | 2.374755000  |
| 1  | 5.131404000  | -1.586417000 | 2.660386000  |
| 6  | 3.953047000  | -0.423625000 | 1.276254000  |
| 1  | 4.818872000  | -0.087676000 | 0.710560000  |
| 6  | 2.669306000  | -0.062555000 | 0.882197000  |
| 6  | 0.053206000  | 1.823290000  | 1.261071000  |
| 6  | 0.932775000  | 2.683293000  | 1.945875000  |
| 1  | 1.740331000  | 2.235056000  | 2.527436000  |
| 6  | 0.815540000  | 4.070758000  | 1.900069000  |
| 1  | 1.527134000  | 4.695742000  | 2.439629000  |
| 6  | -0.218701000 | 4.661557000  | 1.179322000  |
| 1  | -0.323021000 | 5.744626000  | 1.139782000  |
| 6  | -1.116724000 | 3.851548000  | 0.477548000  |
| 1  | -1.909505000 | 4.316297000  | -0.104385000 |
| 6  | -0.946689000 | 2.471970000  | 0.495858000  |
| 23 | 0.075068000  | -0.119083000 | -1.160042000 |
| 5  | 0.114006000  | 0.239179000  | 1.268652000  |
| 6  | 3.479870000  | 0.100497000  | -1.919259000 |
| 1  | 2.933367000  | 0.389566000  | -2.825396000 |

|    |              |              |              |
|----|--------------|--------------|--------------|
| 6  | 3.531315000  | -1.411898000 | -1.850813000 |
| 1  | 4.019252000  | -1.810767000 | -2.747911000 |
| 1  | 4.094004000  | -1.764227000 | -0.982164000 |
| 1  | 2.526487000  | -1.842283000 | -1.791439000 |
| 6  | 4.852238000  | 0.748803000  | -1.965979000 |
| 1  | 5.394302000  | 0.420914000  | -2.861587000 |
| 1  | 4.786158000  | 1.839570000  | -1.997665000 |
| 1  | 5.469584000  | 0.479836000  | -1.104377000 |
| 6  | -1.986580000 | -3.226992000 | -1.029324000 |
| 1  | -2.942942000 | -2.842196000 | -0.654287000 |
| 6  | -1.852065000 | -4.709793000 | -0.735701000 |
| 1  | -2.636554000 | -5.285096000 | -1.243315000 |
| 1  | -0.886922000 | -5.089558000 | -1.087501000 |
| 1  | -1.912940000 | -4.931835000 | 0.332948000  |
| 6  | -1.863248000 | -2.927739000 | -2.509388000 |
| 1  | -2.599578000 | -3.506679000 | -3.079403000 |
| 1  | -2.021856000 | -1.866344000 | -2.723515000 |
| 1  | -0.871522000 | -3.190500000 | -2.894246000 |
| 6  | -2.582200000 | 2.392440000  | -1.856031000 |
| 1  | -1.835215000 | 3.182099000  | -2.007278000 |
| 6  | -2.699707000 | 1.552581000  | -3.113511000 |
| 1  | -3.358780000 | 0.690590000  | -2.954999000 |
| 1  | -3.128642000 | 2.142356000  | -3.931797000 |
| 1  | -1.728786000 | 1.170651000  | -3.439717000 |
| 6  | -3.920605000 | 2.984585000  | -1.450467000 |
| 1  | -4.663643000 | 2.193474000  | -1.304060000 |
| 1  | -3.866365000 | 3.548608000  | -0.516040000 |
| 1  | -4.304241000 | 3.658159000  | -2.227103000 |
| 7  | 0.711045000  | -0.682387000 | -4.179912000 |
| 7  | 0.445190000  | -0.462627000 | -3.082903000 |
| 16 | 2.356632000  | 0.866676000  | -0.636226000 |
| 16 | -0.683386000 | -2.254469000 | -0.096295000 |
| 16 | -1.905417000 | 1.313166000  | -0.499810000 |

{[HIPTN<sub>3</sub>N]-V-N<sub>2</sub>}<sup>-</sup> (TE = -2203.110409)

|    |              |              |             |
|----|--------------|--------------|-------------|
| 23 | -0.165067000 | 0.438077000  | 0.114684000 |
| 7  | 1.592883000  | 1.601322000  | 0.007616000 |
| 7  | 0.622768000  | -1.201759000 | 1.145182000 |
| 7  | -2.144056000 | 0.806055000  | 0.525982000 |
| 6  | 1.619789000  | 2.721421000  | 0.916145000 |
| 1  | 2.540462000  | 2.711223000  | 1.532178000 |
| 1  | 1.639080000  | 3.706475000  | 0.410792000 |
| 6  | 0.395537000  | 2.680981000  | 1.822062000 |
| 1  | 0.568315000  | 3.243462000  | 2.756146000 |
| 1  | -0.459833000 | 3.149171000  | 1.323008000 |
| 6  | -2.404652000 | 1.525570000  | 1.759330000 |

|   |              |              |              |
|---|--------------|--------------|--------------|
| 1 | -2.474645000 | 2.620295000  | 1.611852000  |
| 1 | -3.374366000 | 1.237704000  | 2.199673000  |
| 6 | -1.308970000 | 1.195608000  | 2.755070000  |
| 1 | -1.429859000 | 0.159656000  | 3.087480000  |
| 1 | -1.356092000 | 1.840219000  | 3.649898000  |
| 6 | 0.887176000  | -0.964720000 | 2.545901000  |
| 1 | 0.080707000  | -1.377148000 | 3.186702000  |
| 1 | 1.806020000  | -1.469872000 | 2.895204000  |
| 6 | 1.055883000  | 0.520540000  | 2.803595000  |
| 1 | 1.055994000  | 0.747229000  | 3.883140000  |
| 1 | 2.014956000  | 0.842854000  | 2.394470000  |
| 7 | 0.006887000  | 1.289076000  | 2.107380000  |
| 6 | 0.561601000  | -2.512711000 | 0.771755000  |
| 6 | 0.326593000  | -2.854834000 | -0.588810000 |
| 6 | 0.715352000  | -3.609954000 | 1.663758000  |
| 6 | 0.249044000  | -4.167478000 | -1.013644000 |
| 1 | 0.215049000  | -2.050707000 | -1.313416000 |
| 6 | 0.632513000  | -4.925214000 | 1.220585000  |
| 1 | 0.897574000  | -3.429590000 | 2.719378000  |
| 6 | 0.397269000  | -5.230696000 | -0.116688000 |
| 1 | 0.070810000  | -4.368810000 | -2.069885000 |
| 1 | 0.754896000  | -5.730449000 | 1.945980000  |
| 1 | 0.332598000  | -6.262482000 | -0.454491000 |
| 6 | 2.744413000  | 1.378416000  | -0.686293000 |
| 6 | 2.932453000  | 0.154566000  | -1.385985000 |
| 6 | 3.823239000  | 2.303383000  | -0.754881000 |
| 6 | 4.084235000  | -0.107236000 | -2.102217000 |
| 1 | 2.156129000  | -0.604912000 | -1.316618000 |
| 6 | 4.975137000  | 2.024730000  | -1.482911000 |
| 1 | 3.745476000  | 3.262734000  | -0.249365000 |
| 6 | 5.127211000  | 0.824164000  | -2.170031000 |
| 1 | 4.180102000  | -1.067125000 | -2.609514000 |
| 1 | 5.770644000  | 2.770523000  | -1.513101000 |
| 1 | 6.031465000  | 0.612080000  | -2.736286000 |
| 6 | -3.227663000 | 0.689223000  | -0.323828000 |
| 6 | -3.237568000 | -0.330025000 | -1.304158000 |
| 6 | -4.369729000 | 1.520638000  | -0.265650000 |
| 6 | -4.290573000 | -0.477354000 | -2.189058000 |
| 1 | -2.400100000 | -1.025726000 | -1.331569000 |
| 6 | -5.426568000 | 1.360832000  | -1.156640000 |
| 1 | -4.419385000 | 2.318585000  | 0.471529000  |
| 6 | -5.400496000 | 0.369649000  | -2.131871000 |
| 1 | -4.256001000 | -1.279781000 | -2.924810000 |
| 1 | -6.283932000 | 2.030224000  | -1.085985000 |
| 1 | -6.230198000 | 0.247494000  | -2.824587000 |
| 7 | -0.214187000 | 0.398706000  | -3.014263000 |

7 -0.228107000 0.328587000 -1.884573000

Cartesian coordinates of  $[2a'_{PC}]^-$ - $[2f'_{SB}]^-$  and  $[2a''_{PC}]^-$ - $[2f''_{SB}]^-$ , along with their total energies (in hartree) including zero point vibrational correction at M06-D3(heptane)/def2-SVP level of theory.

$[2a'_{PC}]^-$  (TE = -3059.919348)

|    |              |              |              |
|----|--------------|--------------|--------------|
| 6  | -0.029129000 | 2.464059000  | 1.883050000  |
| 6  | 0.512071000  | 1.224765000  | 2.585757000  |
| 6  | -2.614809000 | -0.044454000 | 1.866034000  |
| 6  | -1.380349000 | -0.432828000 | 2.678234000  |
| 6  | 2.307097000  | -1.289791000 | 1.858671000  |
| 6  | 0.968266000  | -1.197923000 | 2.587252000  |
| 1  | -2.729883000 | 1.055605000  | 1.793091000  |
| 1  | -1.476556000 | -0.002800000 | 3.708161000  |
| 1  | 2.929867000  | -2.128851000 | 2.229978000  |
| 1  | 1.169483000  | -1.067634000 | 3.684355000  |
| 1  | 0.346792000  | 3.401492000  | 2.336231000  |
| 1  | 1.619059000  | 1.257676000  | 2.499615000  |
| 6  | -0.497880000 | 3.790853000  | -0.717282000 |
| 1  | 0.186919000  | 4.087407000  | -1.536298000 |
| 6  | -2.746454000 | -2.458400000 | 0.215271000  |
| 1  | -2.056293000 | -2.761260000 | 1.030475000  |
| 6  | 3.596653000  | -0.711369000 | -0.704382000 |
| 1  | 3.448956000  | 0.371852000  | -0.528591000 |
| 23 | -0.045191000 | -0.093638000 | -0.312935000 |
| 6  | 0.001020000  | -0.124284000 | 2.063355000  |
| 1  | -1.133326000 | 2.497971000  | 1.953138000  |
| 1  | 0.317397000  | 1.326582000  | 3.685721000  |
| 1  | 0.476293000  | -2.185844000 | 2.507128000  |
| 1  | 2.902818000  | -0.369728000 | 2.021734000  |
| 1  | -1.452032000 | -1.529410000 | 2.837626000  |
| 1  | -3.545569000 | -0.428235000 | 2.331486000  |
| 6  | 4.920735000  | -1.088446000 | -0.055846000 |
| 1  | 5.736527000  | -0.466677000 | -0.470176000 |
| 1  | 4.914349000  | -0.928046000 | 1.034786000  |
| 1  | 5.199353000  | -2.138534000 | -0.235072000 |
| 6  | 3.609502000  | -0.922026000 | -2.211054000 |
| 1  | 3.819702000  | -1.974886000 | -2.472424000 |
| 1  | 2.639263000  | -0.657254000 | -2.665781000 |
| 1  | 4.392732000  | -0.307361000 | -2.691925000 |
| 6  | -4.151507000 | -2.878323000 | 0.612908000  |
| 1  | -4.184579000 | -3.959824000 | 0.841878000  |

|    |              |              |              |
|----|--------------|--------------|--------------|
| 1  | -4.521156000 | -2.343457000 | 1.504103000  |
| 1  | -4.871079000 | -2.706805000 | -0.206454000 |
| 6  | -2.288567000 | -3.166657000 | -1.052027000 |
| 1  | -2.955523000 | -2.946421000 | -1.903203000 |
| 1  | -1.273826000 | -2.836774000 | -1.338004000 |
| 1  | -2.276436000 | -4.263888000 | -0.914365000 |
| 6  | -1.808412000 | 3.335242000  | -1.336863000 |
| 1  | -1.675221000 | 2.442556000  | -1.971561000 |
| 1  | -2.529859000 | 3.068396000  | -0.541554000 |
| 1  | -2.271054000 | 4.137557000  | -1.939965000 |
| 6  | -0.736779000 | 4.990094000  | 0.188583000  |
| 1  | 0.181669000  | 5.373265000  | 0.658275000  |
| 1  | -1.192885000 | 5.822426000  | -0.378517000 |
| 1  | -1.439914000 | 4.734896000  | 1.000524000  |
| 6  | 1.969645000  | -3.199832000 | -0.393439000 |
| 1  | 1.638914000  | -3.185070000 | -1.452910000 |
| 6  | 0.885088000  | -3.890372000 | 0.420147000  |
| 1  | 1.221608000  | -4.067509000 | 1.458022000  |
| 1  | -0.025776000 | -3.270235000 | 0.462271000  |
| 1  | 0.623767000  | -4.872559000 | -0.013570000 |
| 6  | 3.271395000  | -3.976881000 | -0.287712000 |
| 1  | 3.095687000  | -5.053208000 | -0.472539000 |
| 1  | 4.030483000  | -3.645268000 | -1.012791000 |
| 1  | 3.709918000  | -3.893643000 | 0.723740000  |
| 6  | -3.762212000 | 0.211512000  | -0.796260000 |
| 1  | -3.382587000 | 1.250582000  | -0.788724000 |
| 6  | -5.143288000 | 0.230646000  | -0.157915000 |
| 1  | -5.630516000 | -0.757276000 | -0.187600000 |
| 1  | -5.119113000 | 0.558929000  | 0.894236000  |
| 1  | -5.805700000 | 0.929244000  | -0.702789000 |
| 6  | -3.819497000 | -0.236631000 | -2.250065000 |
| 1  | -4.264817000 | -1.244322000 | -2.338416000 |
| 1  | -4.456516000 | 0.444129000  | -2.844343000 |
| 1  | -2.822013000 | -0.270463000 | -2.723401000 |
| 6  | 2.180969000  | 2.828477000  | -0.012973000 |
| 1  | 2.653889000  | 2.009797000  | 0.566797000  |
| 6  | 2.597443000  | 4.153771000  | 0.599750000  |
| 1  | 3.698603000  | 4.253107000  | 0.597540000  |
| 1  | 2.202441000  | 5.008751000  | 0.022700000  |
| 1  | 2.263146000  | 4.264351000  | 1.644945000  |
| 6  | 2.654033000  | 2.711235000  | -1.454976000 |
| 1  | 3.757527000  | 2.728594000  | -1.521168000 |
| 1  | 2.290881000  | 1.775454000  | -1.914518000 |
| 1  | 2.280389000  | 3.549776000  | -2.070177000 |
| 15 | -2.333922000 | -0.614909000 | 0.116723000  |
| 15 | 0.366622000  | 2.307656000  | 0.077223000  |

|    |              |              |              |
|----|--------------|--------------|--------------|
| 15 | 1.975229000  | -1.348866000 | 0.025451000  |
| 7  | -0.242323000 | -0.424960000 | -3.366200000 |
| 7  | -0.144239000 | -0.293084000 | -2.213013000 |

[2b'<sub>psi</sub>]<sup>-</sup> (TE = -3311.316125)

|    |              |              |              |
|----|--------------|--------------|--------------|
| 6  | -0.420228000 | 2.638670000  | 1.938033000  |
| 6  | 0.293842000  | 1.645829000  | 2.846297000  |
| 6  | -2.741818000 | -0.498396000 | 1.906387000  |
| 6  | -1.597120000 | -0.809820000 | 2.868722000  |
| 6  | 2.714834000  | -1.037829000 | 1.835265000  |
| 6  | 1.532605000  | -1.186685000 | 2.792833000  |
| 1  | -2.978180000 | 0.585255000  | 1.932669000  |
| 1  | -1.812673000 | -0.410192000 | 3.879646000  |
| 1  | 3.523354000  | -1.778955000 | 2.004782000  |
| 1  | 1.832011000  | -0.912154000 | 3.823943000  |
| 1  | -0.246342000 | 3.705008000  | 2.186636000  |
| 1  | 1.381214000  | 1.865052000  | 2.880347000  |
| 6  | -1.048729000 | 3.525065000  | -0.804069000 |
| 1  | -0.475070000 | 4.471292000  | -0.867506000 |
| 6  | -2.445983000 | -2.694773000 | 0.067147000  |
| 1  | -1.793604000 | -2.988968000 | 0.916505000  |
| 6  | 3.662036000  | -0.159218000 | -0.774222000 |
| 1  | 3.412458000  | 0.895212000  | -0.543351000 |
| 23 | 0.000134000  | -0.082477000 | -0.399522000 |
| 1  | -1.511548000 | 2.477925000  | 2.007939000  |
| 1  | -0.073251000 | 1.727042000  | 3.889018000  |
| 1  | 1.199748000  | -2.241461000 | 2.835190000  |
| 1  | 3.178955000  | -0.041464000 | 1.983497000  |
| 1  | -1.495733000 | -1.908190000 | 2.988165000  |
| 1  | -3.684092000 | -1.025021000 | 2.157911000  |
| 6  | 5.061346000  | -0.410539000 | -0.229941000 |
| 1  | 5.777844000  | 0.293072000  | -0.693928000 |
| 1  | 5.124195000  | -0.262549000 | 0.859911000  |
| 1  | 5.426503000  | -1.426189000 | -0.448874000 |
| 6  | 3.605718000  | -0.312781000 | -2.286252000 |
| 1  | 3.898816000  | -1.329545000 | -2.604066000 |
| 1  | 2.591181000  | -0.128136000 | -2.678548000 |
| 1  | 4.298047000  | 0.393037000  | -2.781512000 |
| 6  | -3.834859000 | -3.255314000 | 0.327936000  |
| 1  | -3.793797000 | -4.354348000 | 0.445234000  |
| 1  | -4.300343000 | -2.848387000 | 1.240868000  |
| 1  | -4.516963000 | -3.054573000 | -0.517140000 |
| 6  | -1.841162000 | -3.295774000 | -1.192288000 |
| 1  | -2.443015000 | -3.062163000 | -2.087303000 |
| 1  | -0.828295000 | -2.898485000 | -1.371389000 |
| 1  | -1.778177000 | -4.397140000 | -1.112229000 |



|    |              |              |              |
|----|--------------|--------------|--------------|
| 6  | -1.286346000 | 2.993499000  | -2.211128000 |
| 1  | -0.351037000 | 2.740177000  | -2.736381000 |
| 1  | -1.873951000 | 2.058379000  | -2.172327000 |
| 1  | -1.841516000 | 3.724960000  | -2.826669000 |
| 6  | -2.376386000 | 3.817049000  | -0.122278000 |
| 1  | -2.258354000 | 4.369015000  | 0.823593000  |
| 1  | -3.030168000 | 4.418067000  | -0.779985000 |
| 1  | -2.921503000 | 2.881554000  | 0.106100000  |
| 6  | 2.333400000  | -2.832902000 | -0.478024000 |
| 1  | 1.942057000  | -2.812428000 | -1.516338000 |
| 6  | 1.383261000  | -3.669614000 | 0.368125000  |
| 1  | 1.800405000  | -3.838418000 | 1.377779000  |
| 1  | 0.408482000  | -3.166948000 | 0.487629000  |
| 1  | 1.211530000  | -4.661936000 | -0.087619000 |
| 6  | 3.712988000  | -3.470638000 | -0.483739000 |
| 1  | 3.638073000  | -4.549319000 | -0.718093000 |
| 1  | 4.389337000  | -3.025555000 | -1.229808000 |
| 1  | 4.200844000  | -3.392696000 | 0.505267000  |
| 6  | -3.674076000 | -0.055234000 | -0.820034000 |
| 1  | -3.351743000 | 1.005981000  | -0.820540000 |
| 6  | -5.063272000 | -0.106985000 | -0.201973000 |
| 1  | -5.459416000 | -1.134504000 | -0.151727000 |
| 1  | -5.087399000 | 0.309487000  | 0.817830000  |
| 1  | -5.774216000 | 0.482132000  | -0.811315000 |
| 6  | -3.689704000 | -0.518709000 | -2.269012000 |
| 1  | -4.079175000 | -1.549150000 | -2.356496000 |
| 1  | -4.348813000 | 0.125155000  | -2.879914000 |
| 1  | -2.684128000 | -0.503952000 | -2.723018000 |
| 6  | 1.715976000  | 3.101932000  | 0.025183000  |
| 1  | 2.348568000  | 2.376030000  | 0.574462000  |
| 6  | 1.873296000  | 4.466466000  | 0.672517000  |
| 1  | 2.889416000  | 4.866927000  | 0.498890000  |
| 1  | 1.164484000  | 5.205641000  | 0.255998000  |
| 1  | 1.718998000  | 4.434696000  | 1.763164000  |
| 6  | 2.171078000  | 3.109718000  | -1.425569000 |
| 1  | 3.250395000  | 3.335415000  | -1.509008000 |
| 1  | 1.986817000  | 2.127717000  | -1.897668000 |
| 1  | 1.633095000  | 3.874900000  | -2.014241000 |
| 15 | -2.210114000 | -0.808158000 | 0.124038000  |
| 15 | 0.013430000  | 2.269525000  | 0.156877000  |
| 15 | 2.168420000  | -1.006499000 | 0.029493000  |
| 14 | 0.060103000  | -0.137793000 | 2.093329000  |
| 7  | -0.004849000 | -0.853654000 | -3.358345000 |
| 7  | -0.009302000 | -0.566540000 | -2.238683000 |

[2c'<sub>PB</sub>] (TE = -3046.708132)

|    |              |              |              |
|----|--------------|--------------|--------------|
| 6  | 0.359412000  | 2.590952000  | 1.858990000  |
| 6  | 0.729403000  | 1.304067000  | 2.587099000  |
| 6  | -2.662994000 | 0.422633000  | 1.781256000  |
| 6  | -1.576025000 | -0.090307000 | 2.716753000  |
| 6  | 2.130074000  | -1.560796000 | 1.852488000  |
| 6  | 0.799868000  | -1.375671000 | 2.573569000  |
| 1  | -2.535244000 | 1.506477000  | 1.586593000  |
| 1  | -1.620026000 | 0.484649000  | 3.671735000  |
| 1  | 2.723223000  | -2.445182000 | 2.165066000  |
| 1  | 1.008316000  | -1.313457000 | 3.670738000  |
| 1  | 0.895476000  | 3.501106000  | 2.204421000  |
| 1  | 1.827606000  | 1.171684000  | 2.538185000  |
| 6  | -0.401130000 | 3.743865000  | -0.758411000 |
| 1  | 0.181346000  | 3.975844000  | -1.672317000 |
| 6  | -2.796709000 | -2.182376000 | 0.480734000  |
| 1  | -1.860983000 | -2.533251000 | 0.955351000  |
| 6  | 3.474067000  | -1.030742000 | -0.759776000 |
| 1  | 3.342015000  | 0.065260000  | -0.818367000 |
| 23 | -0.028956000 | -0.019477000 | -0.548988000 |
| 1  | -0.721503000 | 2.796880000  | 1.996170000  |
| 1  | 0.515480000  | 1.446214000  | 3.674272000  |
| 1  | 0.186423000  | -2.293846000 | 2.452000000  |
| 1  | 2.774391000  | -0.681861000 | 2.047043000  |
| 1  | -1.830808000 | -1.133363000 | 3.004790000  |
| 1  | -3.705905000 | 0.284439000  | 2.138648000  |
| 6  | 4.742029000  | -1.300134000 | 0.036662000  |
| 1  | 5.619211000  | -0.870798000 | -0.482836000 |
| 1  | 4.708978000  | -0.851087000 | 1.042202000  |
| 1  | 4.937988000  | -2.377548000 | 0.167184000  |
| 6  | 3.593667000  | -1.517829000 | -2.196512000 |
| 1  | 3.785724000  | -2.603512000 | -2.255470000 |
| 1  | 2.682584000  | -1.302550000 | -2.779615000 |
| 1  | 4.437169000  | -1.015441000 | -2.703222000 |
| 6  | -3.930380000 | -2.478609000 | 1.450619000  |
| 1  | -3.984380000 | -3.566283000 | 1.643401000  |
| 1  | -3.784573000 | -1.984879000 | 2.424452000  |
| 1  | -4.914056000 | -2.172989000 | 1.060094000  |
| 6  | -2.970512000 | -2.942291000 | -0.826225000 |
| 1  | -3.949038000 | -2.728090000 | -1.292369000 |
| 1  | -2.187963000 | -2.674974000 | -1.559228000 |
| 1  | -2.920341000 | -4.034246000 | -0.661486000 |
| 6  | -1.775056000 | 3.267003000  | -1.193919000 |
| 1  | -1.713233000 | 2.345659000  | -1.796255000 |
| 1  | -2.401811000 | 3.041415000  | -0.310836000 |
| 1  | -2.301716000 | 4.042901000  | -1.779006000 |
| 6  | -0.544809000 | 5.002860000  | 0.085212000  |

|    |              |              |              |
|----|--------------|--------------|--------------|
| 1  | 0.412609000  | 5.413270000  | 0.436498000  |
| 1  | -1.058477000 | 5.797610000  | -0.486734000 |
| 1  | -1.162484000 | 4.802570000  | 0.977703000  |
| 5  | -0.048404000 | -0.057631000 | 2.082071000  |
| 7  | 0.164670000  | -0.471252000 | -3.596803000 |
| 7  | 0.082050000  | -0.285534000 | -2.466306000 |
| 6  | -3.774679000 | 0.317552000  | -0.892121000 |
| 1  | -3.634950000 | 1.397898000  | -0.692661000 |
| 6  | -5.199212000 | -0.034621000 | -0.493645000 |
| 1  | -5.923880000 | 0.582915000  | -1.057129000 |
| 1  | -5.438171000 | -1.087786000 | -0.723382000 |
| 1  | -5.393997000 | 0.128476000  | 0.579121000  |
| 6  | -3.554222000 | 0.103908000  | -2.382421000 |
| 1  | -4.239732000 | 0.732570000  | -2.980241000 |
| 1  | -2.518903000 | 0.343523000  | -2.677609000 |
| 1  | -3.737412000 | -0.944521000 | -2.675182000 |
| 6  | 2.353406000  | 2.867922000  | -0.325444000 |
| 1  | 2.516241000  | 2.417135000  | -1.326388000 |
| 6  | 2.654187000  | 4.355788000  | -0.421205000 |
| 1  | 3.714989000  | 4.506619000  | -0.694048000 |
| 1  | 2.049100000  | 4.880214000  | -1.176893000 |
| 1  | 2.503913000  | 4.858919000  | 0.550722000  |
| 6  | 3.334684000  | 2.233881000  | 0.649447000  |
| 1  | 3.105295000  | 1.176969000  | 0.844907000  |
| 1  | 4.368916000  | 2.296053000  | 0.262920000  |
| 1  | 3.313632000  | 2.756381000  | 1.621955000  |
| 6  | 1.702746000  | -3.356019000 | -0.473963000 |
| 1  | 1.685422000  | -3.298144000 | -1.580625000 |
| 6  | 0.366443000  | -3.924724000 | -0.034389000 |
| 1  | 0.198946000  | -4.930385000 | -0.460822000 |
| 1  | 0.306578000  | -4.011981000 | 1.065829000  |
| 1  | -0.448917000 | -3.262873000 | -0.361321000 |
| 6  | 2.842617000  | -4.264523000 | -0.043590000 |
| 1  | 2.643618000  | -5.307305000 | -0.353001000 |
| 1  | 3.812298000  | -3.978078000 | -0.479679000 |
| 1  | 2.957864000  | -4.274873000 | 1.054815000  |
| 15 | 1.814617000  | -1.531898000 | 0.020385000  |
| 15 | 0.565370000  | 2.313806000  | 0.033400000  |
| 15 | -2.341796000 | -0.378672000 | 0.148269000  |

[2d'<sub>sc</sub>]<sup>-</sup> (TE = -2875.565304)

|   |              |              |             |
|---|--------------|--------------|-------------|
| 6 | 0.377459000  | 2.184027000  | 1.697879000 |
| 6 | 0.380863000  | 0.933257000  | 2.567290000 |
| 6 | -2.674418000 | 0.419551000  | 1.626783000 |
| 6 | -1.698463000 | -0.471674000 | 2.370905000 |
| 6 | 1.893051000  | -1.759591000 | 1.840313000 |

|    |              |              |              |
|----|--------------|--------------|--------------|
| 6  | 0.518743000  | -1.560765000 | 2.454725000  |
| 1  | -2.473646000 | 1.490649000  | 1.810271000  |
| 1  | -1.840648000 | -0.292529000 | 3.471302000  |
| 1  | 2.400815000  | -2.657898000 | 2.238548000  |
| 1  | 0.654067000  | -1.566941000 | 3.570985000  |
| 1  | 0.888334000  | 3.030082000  | 2.195726000  |
| 1  | 1.443031000  | 0.740791000  | 2.829286000  |
| 6  | 0.825145000  | 3.196682000  | -0.954133000 |
| 1  | 1.481655000  | 2.991742000  | -1.820560000 |
| 6  | -3.550940000 | -1.352653000 | -0.367675000 |
| 1  | -3.582114000 | -1.795689000 | 0.645527000  |
| 6  | 3.357931000  | -1.185839000 | -0.511029000 |
| 1  | 3.479038000  | -0.256518000 | 0.078526000  |
| 23 | -0.100309000 | -0.263629000 | -0.341022000 |
| 16 | -2.451870000 | 0.186031000  | -0.197388000 |
| 16 | 1.253011000  | 1.746836000  | 0.133648000  |
| 16 | 1.702585000  | -1.880091000 | 0.006450000  |
| 6  | -0.236748000 | -0.330805000 | 1.952542000  |
| 1  | -0.647780000 | 2.500836000  | 1.437955000  |
| 1  | -0.103483000 | 1.203522000  | 3.540931000  |
| 1  | -0.081804000 | -2.465886000 | 2.228773000  |
| 1  | 2.546817000  | -0.887228000 | 2.031725000  |
| 1  | -2.018288000 | -1.521557000 | 2.204470000  |
| 1  | -3.730987000 | 0.238888000  | 1.903554000  |
| 6  | 4.474107000  | -2.161922000 | -0.209455000 |
| 1  | 5.454233000  | -1.748245000 | -0.509933000 |
| 1  | 4.531930000  | -2.408588000 | 0.863555000  |
| 1  | 4.319440000  | -3.104120000 | -0.764366000 |
| 6  | 3.257801000  | -0.834472000 | -1.979120000 |
| 1  | 3.020414000  | -1.727779000 | -2.585164000 |
| 1  | 2.445656000  | -0.105660000 | -2.139057000 |
| 1  | 4.211453000  | -0.415282000 | -2.346088000 |
| 6  | -4.936859000 | -0.929946000 | -0.802278000 |
| 1  | -5.618598000 | -1.796893000 | -0.884744000 |
| 1  | -5.387754000 | -0.211971000 | -0.096032000 |
| 1  | -4.893696000 | -0.440474000 | -1.791109000 |
| 6  | -2.886418000 | -2.318349000 | -1.317359000 |
| 1  | -2.775316000 | -1.884737000 | -2.327382000 |
| 1  | -1.864997000 | -2.550030000 | -0.958805000 |
| 1  | -3.471155000 | -3.252568000 | -1.400852000 |
| 6  | -0.616072000 | 3.154213000  | -1.412151000 |
| 1  | -0.846401000 | 2.192472000  | -1.899008000 |
| 1  | -1.315115000 | 3.268964000  | -0.564176000 |
| 1  | -0.820598000 | 3.974678000  | -2.123343000 |
| 6  | 1.215867000  | 4.518984000  | -0.326609000 |
| 1  | 2.255403000  | 4.502827000  | 0.039660000  |

|   |              |              |              |
|---|--------------|--------------|--------------|
| 1 | 1.120338000  | 5.342893000  | -1.056235000 |
| 1 | 0.558536000  | 4.764068000  | 0.525691000  |
| 7 | -0.279995000 | -0.739704000 | -3.382972000 |
| 7 | -0.191090000 | -0.537003000 | -2.241781000 |

[2e'<sub>ssi</sub>] (TE = -3126.941113)

|    |              |              |              |
|----|--------------|--------------|--------------|
| 23 | -0.002845000 | 0.017007000  | -0.717575000 |
| 16 | 1.657155000  | -1.768423000 | -0.902706000 |
| 16 | -2.218948000 | -1.108334000 | -1.166792000 |
| 16 | -0.369504000 | 1.889937000  | 0.698124000  |
| 14 | -0.353733000 | -1.064560000 | 1.479548000  |
| 6  | -0.426221000 | 0.234221000  | 2.924897000  |
| 6  | 0.258894000  | 1.494987000  | 2.424493000  |
| 6  | -2.420257000 | -2.454548000 | 0.092182000  |
| 6  | -2.019869000 | -2.079533000 | 1.510111000  |
| 6  | 1.074609000  | -2.335545000 | 1.843897000  |
| 6  | 1.472190000  | -2.977559000 | 0.529760000  |
| 1  | 0.663597000  | -3.632595000 | 0.154982000  |
| 1  | 2.383554000  | -3.602143000 | 0.565515000  |
| 1  | 1.931943000  | -1.783271000 | 2.280844000  |
| 1  | 0.796151000  | -3.121462000 | 2.574426000  |
| 1  | -3.450098000 | -2.848204000 | -0.004112000 |
| 1  | -1.750277000 | -3.233275000 | -0.314763000 |
| 1  | -2.808819000 | -1.452558000 | 1.971259000  |
| 1  | -1.965459000 | -3.003144000 | 2.120387000  |
| 1  | -1.492312000 | 0.452312000  | 3.137840000  |
| 1  | 0.035077000  | -0.086152000 | 3.879319000  |
| 1  | 1.349638000  | 1.327217000  | 2.331517000  |
| 1  | 0.094654000  | 2.380371000  | 3.068478000  |
| 6  | 3.270233000  | -0.954779000 | -0.416673000 |
| 1  | 2.992528000  | -0.270954000 | 0.411348000  |
| 6  | -3.473990000 | 0.125368000  | -0.572857000 |
| 1  | -3.137198000 | 0.426565000  | 0.437283000  |
| 6  | 0.716837000  | 3.373492000  | 0.321973000  |
| 1  | 0.413594000  | 3.559190000  | -0.725126000 |
| 6  | -4.873614000 | -0.448548000 | -0.524514000 |
| 1  | -5.598271000 | 0.329959000  | -0.225321000 |
| 1  | -5.172864000 | -0.826812000 | -1.518076000 |
| 1  | -4.966557000 | -1.275185000 | 0.198323000  |
| 6  | -3.373119000 | 1.320770000  | -1.498937000 |
| 1  | -2.333907000 | 1.690102000  | -1.540633000 |
| 1  | -3.686578000 | 1.051001000  | -2.523501000 |
| 1  | -4.023628000 | 2.139095000  | -1.145370000 |
| 6  | 0.379229000  | 4.579182000  | 1.172840000  |
| 1  | 0.660073000  | 4.417588000  | 2.228732000  |

|   |              |              |              |
|---|--------------|--------------|--------------|
| 1 | 0.926849000  | 5.475630000  | 0.827025000  |
| 1 | -0.699075000 | 4.805556000  | 1.142264000  |
| 6 | 2.187692000  | 3.019822000  | 0.334984000  |
| 1 | 2.788433000  | 3.789612000  | -0.181955000 |
| 1 | 2.576774000  | 2.934493000  | 1.365496000  |
| 1 | 2.342627000  | 2.051440000  | -0.174644000 |
| 6 | 3.729881000  | -0.138685000 | -1.607241000 |
| 1 | 4.623670000  | 0.453383000  | -1.341432000 |
| 1 | 3.998444000  | -0.801697000 | -2.449215000 |
| 1 | 2.948572000  | 0.553023000  | -1.957398000 |
| 6 | 4.337283000  | -1.932419000 | 0.028610000  |
| 1 | 5.296038000  | -1.403701000 | 0.176986000  |
| 1 | 4.090460000  | -2.433243000 | 0.977721000  |
| 1 | 4.498052000  | -2.709445000 | -0.740510000 |
| 7 | 0.933853000  | 1.783181000  | -3.039904000 |
| 7 | 0.573876000  | 1.072787000  | -2.196709000 |

[2f<sub>SB</sub>]<sup>-</sup> (TE = -2862.362338)

|    |              |              |              |
|----|--------------|--------------|--------------|
| 6  | 0.738222000  | -2.367818000 | -1.801717000 |
| 6  | 0.451577000  | -1.149823000 | -2.654226000 |
| 6  | -2.745376000 | -1.157149000 | -1.053914000 |
| 6  | -2.091419000 | -0.343503000 | -2.150013000 |
| 6  | 1.164646000  | 2.036834000  | -2.096787000 |
| 6  | -0.131582000 | 1.465208000  | -2.620725000 |
| 1  | -2.285201000 | -2.158845000 | -0.959408000 |
| 1  | -2.259039000 | -0.906837000 | -3.100847000 |
| 1  | 1.427054000  | 3.044195000  | -2.478352000 |
| 1  | -0.034443000 | 1.407765000  | -3.734365000 |
| 1  | 1.416914000  | -3.114658000 | -2.261233000 |
| 1  | 1.432002000  | -0.722872000 | -2.962722000 |
| 6  | 1.472046000  | -3.163557000 | 0.880637000  |
| 1  | 1.954533000  | -2.732367000 | 1.778369000  |
| 6  | -3.206950000 | 1.225644000  | 0.448785000  |
| 1  | -2.754092000 | 1.660836000  | -0.460561000 |
| 6  | 2.827028000  | 2.267103000  | 0.166603000  |
| 1  | 3.328488000  | 1.492817000  | -0.446815000 |
| 23 | -0.006332000 | 0.044026000  | 0.532729000  |
| 16 | -2.428035000 | -0.449810000 | 0.617558000  |
| 16 | 1.518118000  | -1.704601000 | -0.266676000 |
| 16 | 1.019667000  | 2.109155000  | -0.253487000 |
| 1  | -0.197663000 | -2.881453000 | -1.509400000 |
| 1  | -0.018491000 | -1.512577000 | -3.601268000 |
| 1  | -0.941227000 | 2.203616000  | -2.433708000 |
| 1  | 2.015117000  | 1.357733000  | -2.305727000 |
| 1  | -2.679343000 | 0.591253000  | -2.278788000 |
| 1  | -3.837718000 | -1.320823000 | -1.162782000 |

|   |              |              |              |
|---|--------------|--------------|--------------|
| 6 | 3.354241000  | 3.642596000  | -0.187668000 |
| 1 | 4.432500000  | 3.726263000  | 0.041672000  |
| 1 | 3.221714000  | 3.875589000  | -1.256229000 |
| 1 | 2.822502000  | 4.416097000  | 0.394027000  |
| 6 | 3.015008000  | 1.938505000  | 1.631367000  |
| 1 | 2.417717000  | 2.614957000  | 2.269737000  |
| 1 | 2.690443000  | 0.907978000  | 1.848261000  |
| 1 | 4.075080000  | 2.046110000  | 1.921127000  |
| 6 | -4.710217000 | 1.119950000  | 0.305794000  |
| 1 | -5.162968000 | 2.122479000  | 0.203990000  |
| 1 | -5.001912000 | 0.535550000  | -0.582158000 |
| 1 | -5.152868000 | 0.635053000  | 1.193875000  |
| 6 | -2.789363000 | 2.048855000  | 1.649543000  |
| 1 | -3.091591000 | 1.562335000  | 2.595165000  |
| 1 | -1.693670000 | 2.178421000  | 1.667261000  |
| 1 | -3.260473000 | 3.046426000  | 1.612804000  |
| 6 | 0.056892000  | -3.567187000 | 1.238316000  |
| 1 | -0.523081000 | -2.692338000 | 1.581693000  |
| 1 | -0.467166000 | -4.006533000 | 0.370983000  |
| 1 | 0.056222000  | -4.326439000 | 2.040470000  |
| 6 | 2.300644000  | -4.322088000 | 0.363211000  |
| 1 | 3.322244000  | -4.004085000 | 0.100242000  |
| 1 | 2.372719000  | -5.124015000 | 1.119949000  |
| 1 | 1.841083000  | -4.765081000 | -0.537589000 |
| 5 | -0.492594000 | 0.009523000  | -1.952101000 |
| 7 | 0.272139000  | 0.212348000  | 3.612436000  |
| 7 | 0.178554000  | 0.139925000  | 2.468492000  |

[2a''<sub>pc</sub>] (TE = -3516.494223)

|   |              |              |             |
|---|--------------|--------------|-------------|
| 6 | -0.117164000 | 1.602212000  | 1.638891000 |
| 6 | 0.527963000  | 2.121190000  | 2.779278000 |
| 1 | 1.136621000  | 1.446856000  | 3.391747000 |
| 6 | 0.413633000  | 3.456178000  | 3.160896000 |
| 1 | 0.938048000  | 3.809621000  | 4.055595000 |
| 6 | -0.377189000 | 4.332231000  | 2.421170000 |
| 1 | -0.483564000 | 5.380519000  | 2.718451000 |
| 6 | -1.018850000 | 3.850788000  | 1.280368000 |
| 1 | -1.619388000 | 4.541581000  | 0.674235000 |
| 6 | -0.874177000 | 2.523182000  | 0.864380000 |
| 6 | -1.264251000 | -0.614783000 | 1.798741000 |
| 6 | -1.971966000 | -0.191097000 | 2.939502000 |
| 1 | -1.683137000 | 0.752118000  | 3.417300000 |
| 6 | -3.006428000 | -0.939707000 | 3.496781000 |
| 1 | -3.525668000 | -0.567625000 | 4.386926000 |
| 6 | -3.358129000 | -2.168364000 | 2.943750000 |
| 1 | -4.153152000 | -2.776268000 | 3.387495000 |

|    |              |              |              |
|----|--------------|--------------|--------------|
| 6  | -2.689284000 | -2.606500000 | 1.800289000  |
| 1  | -2.970076000 | -3.566264000 | 1.353334000  |
| 6  | -1.691001000 | -1.833104000 | 1.197053000  |
| 6  | 1.221468000  | -0.497000000 | 1.804382000  |
| 6  | 1.261020000  | -1.138282000 | 3.057079000  |
| 1  | 0.330191000  | -1.233465000 | 3.627472000  |
| 6  | 2.439398000  | -1.640024000 | 3.604219000  |
| 1  | 2.418073000  | -2.129782000 | 4.584039000  |
| 6  | 3.640786000  | -1.498931000 | 2.915584000  |
| 1  | 4.577976000  | -1.874780000 | 3.338909000  |
| 6  | 3.630445000  | -0.884754000 | 1.663710000  |
| 1  | 4.571748000  | -0.800679000 | 1.112886000  |
| 6  | 2.444443000  | -0.417383000 | 1.081399000  |
| 23 | -0.058246000 | -0.012067000 | -1.003369000 |
| 6  | -3.360974000 | 2.293013000  | -0.522971000 |
| 1  | -3.407825000 | 3.354639000  | -0.204465000 |
| 6  | -0.104800000 | -3.849718000 | -0.276864000 |
| 1  | -0.844872000 | -4.585090000 | 0.096936000  |
| 6  | 3.413311000  | 1.731522000  | -0.710847000 |
| 1  | 3.192291000  | 2.140425000  | -1.717826000 |
| 6  | 4.917398000  | 1.544945000  | -0.586418000 |
| 1  | 5.427089000  | 2.523895000  | -0.654341000 |
| 1  | 5.189674000  | 1.114755000  | 0.393068000  |
| 1  | 5.342737000  | 0.902189000  | -1.372162000 |
| 6  | 2.929634000  | 2.732466000  | 0.325493000  |
| 1  | 3.198038000  | 2.399892000  | 1.344049000  |
| 1  | 3.393651000  | 3.722210000  | 0.163531000  |
| 1  | 1.836038000  | 2.855323000  | 0.302958000  |
| 6  | -4.180618000 | 2.137373000  | -1.793865000 |
| 1  | -3.900002000 | 2.862673000  | -2.573755000 |
| 1  | -4.072936000 | 1.125625000  | -2.222126000 |
| 1  | -5.253691000 | 2.288859000  | -1.578599000 |
| 6  | -3.914226000 | 1.429355000  | 0.596051000  |
| 1  | -3.412822000 | 1.628974000  | 1.556097000  |
| 1  | -4.995799000 | 1.608227000  | 0.732397000  |
| 1  | -3.772829000 | 0.355799000  | 0.378709000  |
| 6  | 0.423355000  | -4.299449000 | -1.631771000 |
| 1  | 1.027847000  | -5.218599000 | -1.532962000 |
| 1  | -0.373850000 | -4.503755000 | -2.364358000 |
| 1  | 1.073970000  | -3.520017000 | -2.070607000 |
| 6  | 1.025717000  | -3.748834000 | 0.730065000  |
| 1  | 1.756833000  | -2.978847000 | 0.423907000  |
| 1  | 0.666938000  | -3.466328000 | 1.732603000  |
| 1  | 1.559661000  | -4.712025000 | 0.814940000  |
| 6  | -0.055807000 | 0.134053000  | 1.288145000  |
| 7  | -0.118903000 | -0.848064000 | -3.970831000 |



|    |              |              |              |
|----|--------------|--------------|--------------|
| 7  | -0.090086000 | -0.461674000 | -2.876574000 |
| 6  | -1.114168000 | 3.339501000  | -1.990180000 |
| 1  | -1.871640000 | 4.139871000  | -1.859366000 |
| 6  | -1.203836000 | 2.761684000  | -3.399606000 |
| 1  | -1.105270000 | 3.559170000  | -4.158008000 |
| 1  | -0.382358000 | 2.040273000  | -3.552406000 |
| 1  | -2.139018000 | 2.214157000  | -3.597201000 |
| 6  | 0.278307000  | 3.914762000  | -1.797431000 |
| 1  | 0.408641000  | 4.434700000  | -0.835774000 |
| 1  | 1.016375000  | 3.092452000  | -1.839651000 |
| 1  | 0.518489000  | 4.625194000  | -2.608551000 |
| 6  | 3.203908000  | -1.052047000 | -1.780866000 |
| 1  | 2.379318000  | -1.781259000 | -1.895053000 |
| 6  | 4.432020000  | -1.829316000 | -1.336417000 |
| 1  | 4.734335000  | -2.531593000 | -2.135564000 |
| 1  | 5.303318000  | -1.185006000 | -1.129618000 |
| 1  | 4.235268000  | -2.430734000 | -0.434815000 |
| 6  | 3.394853000  | -0.392724000 | -3.140862000 |
| 1  | 4.280357000  | 0.267419000  | -3.158986000 |
| 1  | 3.535470000  | -1.154411000 | -3.927590000 |
| 1  | 2.509230000  | 0.205014000  | -3.417667000 |
| 6  | -2.415993000 | -2.726748000 | -1.597047000 |
| 1  | -1.858470000 | -2.820078000 | -2.551341000 |
| 6  | -3.391511000 | -1.579564000 | -1.777725000 |
| 1  | -4.091453000 | -1.781265000 | -2.608305000 |
| 1  | -3.995217000 | -1.420824000 | -0.864219000 |
| 1  | -2.840047000 | -0.646613000 | -1.991306000 |
| 6  | -3.151836000 | -4.032152000 | -1.339322000 |
| 1  | -3.785101000 | -4.287195000 | -2.208730000 |
| 1  | -2.484239000 | -4.891767000 | -1.165301000 |
| 1  | -3.830468000 | -3.949533000 | -0.473226000 |
| 15 | 2.306894000  | 0.193383000  | -0.662443000 |
| 15 | -1.510077000 | 1.942489000  | -0.769752000 |
| 15 | -0.991181000 | -2.196990000 | -0.468109000 |

[2b''<sub>psi</sub>]' (TE = -3767.864828)

|   |             |             |             |
|---|-------------|-------------|-------------|
| 6 | 0.358231000 | 1.942886000 | 1.822147000 |
| 6 | 0.867974000 | 2.326075000 | 3.070473000 |
| 1 | 0.980815000 | 1.573898000 | 3.862584000 |
| 6 | 1.272380000 | 3.638893000 | 3.320157000 |
| 1 | 1.691378000 | 3.910052000 | 4.295508000 |
| 6 | 1.142487000 | 4.605299000 | 2.324522000 |
| 1 | 1.453959000 | 5.638214000 | 2.513281000 |
| 6 | 0.616885000 | 4.250667000 | 1.080518000 |
| 1 | 0.510099000 | 5.021158000 | 0.306211000 |
| 6 | 0.254415000 | 2.925642000 | 0.815725000 |

|    |              |              |              |
|----|--------------|--------------|--------------|
| 6  | -1.744350000 | -0.359761000 | 2.045672000  |
| 6  | -2.199844000 | -0.027959000 | 3.328311000  |
| 1  | -1.572714000 | 0.597569000  | 3.978168000  |
| 6  | -3.443141000 | -0.456913000 | 3.795747000  |
| 1  | -3.787358000 | -0.168253000 | 4.795146000  |
| 6  | -4.240451000 | -1.263903000 | 2.987506000  |
| 1  | -5.211176000 | -1.620238000 | 3.349076000  |
| 6  | -3.801875000 | -1.616832000 | 1.709870000  |
| 1  | -4.432210000 | -2.269676000 | 1.098562000  |
| 6  | -2.579415000 | -1.143732000 | 1.216786000  |
| 6  | 1.259495000  | -0.985653000 | 2.006048000  |
| 6  | 1.283324000  | -1.434704000 | 3.332722000  |
| 1  | 0.491776000  | -1.111414000 | 4.022368000  |
| 6  | 2.271034000  | -2.305192000 | 3.792724000  |
| 1  | 2.263427000  | -2.652338000 | 4.831848000  |
| 6  | 3.268892000  | -2.730066000 | 2.919087000  |
| 1  | 4.055082000  | -3.409350000 | 3.265734000  |
| 6  | 3.264929000  | -2.294425000 | 1.593107000  |
| 1  | 4.057159000  | -2.646117000 | 0.927854000  |
| 6  | 2.259849000  | -1.440416000 | 1.116404000  |
| 23 | -0.112984000 | -0.048457000 | -1.180645000 |
| 6  | -2.045609000 | 3.324108000  | -0.697079000 |
| 1  | -1.742128000 | 4.330642000  | -0.345748000 |
| 6  | -1.628681000 | -3.347752000 | -0.361019000 |
| 1  | -2.581186000 | -3.786993000 | -0.002765000 |
| 6  | 3.694538000  | 0.304150000  | -0.691311000 |
| 1  | 3.605796000  | 0.791105000  | -1.682932000 |
| 6  | 5.049859000  | -0.381296000 | -0.616821000 |
| 1  | 5.855992000  | 0.370065000  | -0.707404000 |
| 1  | 5.193527000  | -0.883139000 | 0.355184000  |
| 1  | 5.207678000  | -1.124835000 | -1.413024000 |
| 6  | 3.603556000  | 1.377624000  | 0.382451000  |
| 1  | 3.740363000  | 0.941757000  | 1.388593000  |
| 1  | 4.391075000  | 2.139878000  | 0.239016000  |
| 1  | 2.628963000  | 1.888397000  | 0.380109000  |
| 6  | -2.798680000 | 3.488783000  | -2.005882000 |
| 1  | -2.250370000 | 4.105651000  | -2.735546000 |
| 1  | -3.013376000 | 2.517713000  | -2.482709000 |
| 1  | -3.770459000 | 3.983574000  | -1.826826000 |
| 6  | -2.914220000 | 2.679677000  | 0.369865000  |
| 1  | -2.428748000 | 2.686954000  | 1.359526000  |
| 1  | -3.881289000 | 3.205421000  | 0.463071000  |
| 1  | -3.120252000 | 1.622778000  | 0.126392000  |
| 6  | -1.264992000 | -3.948149000 | -1.709579000 |
| 1  | -0.991517000 | -5.013104000 | -1.602536000 |
| 1  | -2.080102000 | -3.888660000 | -2.448355000 |

|    |              |              |              |
|----|--------------|--------------|--------------|
| 1  | -0.396043000 | -3.420875000 | -2.143212000 |
| 6  | -0.547185000 | -3.652801000 | 0.660457000  |
| 1  | 0.416218000  | -3.211321000 | 0.350094000  |
| 1  | -0.779695000 | -3.247101000 | 1.659013000  |
| 1  | -0.404000000 | -4.743449000 | 0.761447000  |
| 7  | -0.390030000 | -1.101218000 | -4.043109000 |
| 7  | -0.242940000 | -0.677614000 | -2.981946000 |
| 6  | 0.480733000  | 3.457544000  | -2.109628000 |
| 1  | 0.067016000  | 4.484153000  | -2.031851000 |
| 6  | 0.203522000  | 2.886417000  | -3.496156000 |
| 1  | 0.636381000  | 3.532151000  | -4.281485000 |
| 1  | 0.667038000  | 1.885888000  | -3.575779000 |
| 1  | -0.867546000 | 2.751932000  | -3.714643000 |
| 6  | 1.984052000  | 3.485541000  | -1.897410000 |
| 1  | 2.285242000  | 3.946481000  | -0.944032000 |
| 1  | 2.365299000  | 2.448374000  | -1.905652000 |
| 1  | 2.483789000  | 4.031515000  | -2.717327000 |
| 6  | 2.571894000  | -2.234509000 | -1.818845000 |
| 1  | 1.549940000  | -2.638238000 | -1.949664000 |
| 6  | 3.458461000  | -3.408189000 | -1.434642000 |
| 1  | 3.484800000  | -4.136243000 | -2.267017000 |
| 1  | 4.503957000  | -3.116471000 | -1.234703000 |
| 1  | 3.078450000  | -3.943680000 | -0.550552000 |
| 6  | 2.977411000  | -1.631935000 | -3.157950000 |
| 1  | 4.048999000  | -1.366012000 | -3.181057000 |
| 1  | 2.795426000  | -2.345255000 | -3.980919000 |
| 1  | 2.391075000  | -0.722720000 | -3.377797000 |
| 6  | -3.389942000 | -1.510308000 | -1.711880000 |
| 1  | -2.853919000 | -1.871160000 | -2.613059000 |
| 6  | -3.842292000 | -0.096136000 | -2.016995000 |
| 1  | -4.538190000 | -0.074068000 | -2.875045000 |
| 1  | -4.363884000 | 0.356813000  | -1.152782000 |
| 1  | -2.968426000 | 0.533930000  | -2.253729000 |
| 6  | -4.584285000 | -2.421712000 | -1.474308000 |
| 1  | -5.169011000 | -2.528951000 | -2.406433000 |
| 1  | -4.309940000 | -3.438182000 | -1.146468000 |
| 1  | -5.271808000 | -1.996974000 | -0.723260000 |
| 15 | 2.138364000  | -0.790790000 | -0.643738000 |
| 15 | -0.402195000 | 2.359550000  | -0.837490000 |
| 15 | -1.920802000 | -1.479565000 | -0.510749000 |
| 14 | -0.073587000 | 0.164385000  | 1.229331000  |

[2c''<sub>PB</sub>] (TE = -3503.300359)

|   |              |             |             |
|---|--------------|-------------|-------------|
| 6 | -1.227428000 | 0.848789000 | 1.836367000 |
| 6 | -1.173093000 | 1.702676000 | 2.961043000 |
| 1 | -0.199158000 | 1.881004000 | 3.436295000 |

|    |              |              |              |
|----|--------------|--------------|--------------|
| 6  | -2.301533000 | 2.314955000  | 3.500115000  |
| 1  | -2.203222000 | 2.969457000  | 4.374291000  |
| 6  | -3.561066000 | 2.078424000  | 2.945518000  |
| 1  | -4.457840000 | 2.540582000  | 3.371608000  |
| 6  | -3.655027000 | 1.261418000  | 1.820349000  |
| 1  | -4.638546000 | 1.100075000  | 1.364504000  |
| 6  | -2.511111000 | 0.690112000  | 1.249130000  |
| 6  | 0.190803000  | -1.439859000 | 1.850189000  |
| 6  | -0.361517000 | -1.847946000 | 3.083604000  |
| 1  | -1.015267000 | -1.146721000 | 3.620724000  |
| 6  | -0.087669000 | -3.087125000 | 3.655374000  |
| 1  | -0.538774000 | -3.356212000 | 4.617979000  |
| 6  | 0.785706000  | -3.977996000 | 3.024994000  |
| 1  | 1.025353000  | -4.944136000 | 3.481545000  |
| 6  | 1.333738000  | -3.622948000 | 1.793429000  |
| 1  | 2.005567000  | -4.325001000 | 1.285161000  |
| 6  | 1.007440000  | -2.401136000 | 1.192123000  |
| 6  | 1.430682000  | 0.867229000  | 1.639143000  |
| 6  | 2.172870000  | 0.612021000  | 2.812979000  |
| 1  | 1.828284000  | -0.182801000 | 3.488353000  |
| 6  | 3.324655000  | 1.317983000  | 3.145018000  |
| 1  | 3.866267000  | 1.081279000  | 4.068515000  |
| 6  | 3.794498000  | 2.324791000  | 2.299266000  |
| 1  | 4.708018000  | 2.878869000  | 2.539925000  |
| 6  | 3.088426000  | 2.608740000  | 1.133452000  |
| 1  | 3.473586000  | 3.385774000  | 0.465931000  |
| 6  | 1.928859000  | 1.894259000  | 0.800958000  |
| 23 | -0.126993000 | -0.120551000 | -1.132827000 |
| 6  | -3.578916000 | -1.654442000 | -0.176462000 |
| 1  | -4.573809000 | -1.295204000 | 0.151407000  |
| 6  | 3.289158000  | -1.904536000 | -0.699100000 |
| 1  | 3.654060000  | -2.936321000 | -0.534652000 |
| 6  | 0.104277000  | 3.744408000  | -0.682175000 |
| 1  | 0.358470000  | 4.241876000  | -1.637401000 |
| 6  | 0.550575000  | 4.630433000  | 0.468613000  |
| 1  | 0.009232000  | 5.593643000  | 0.442539000  |
| 1  | 0.330045000  | 4.150687000  | 1.438371000  |
| 1  | 1.629006000  | 4.852078000  | 0.453701000  |
| 6  | -1.400938000 | 3.559629000  | -0.656784000 |
| 1  | -1.729584000 | 3.031791000  | 0.256082000  |
| 1  | -1.913095000 | 4.538801000  | -0.682498000 |
| 1  | -1.742986000 | 2.973726000  | -1.524299000 |
| 6  | -3.735646000 | -2.396426000 | -1.496872000 |
| 1  | -4.286992000 | -1.812082000 | -2.250573000 |
| 1  | -2.757371000 | -2.642913000 | -1.942416000 |
| 1  | -4.281738000 | -3.345955000 | -1.351921000 |

|    |              |              |              |
|----|--------------|--------------|--------------|
| 6  | -3.022658000 | -2.550082000 | 0.917415000  |
| 1  | -3.009942000 | -2.040136000 | 1.893964000  |
| 1  | -3.632887000 | -3.465807000 | 1.015691000  |
| 1  | -1.982675000 | -2.855286000 | 0.711973000  |
| 6  | 3.627901000  | -1.459833000 | -2.114731000 |
| 1  | 4.720454000  | -1.419385000 | -2.272795000 |
| 1  | 3.199106000  | -2.116007000 | -2.891318000 |
| 1  | 3.221894000  | -0.445843000 | -2.288636000 |
| 6  | 3.951428000  | -1.000652000 | 0.321269000  |
| 1  | 3.614577000  | 0.043511000  | 0.207225000  |
| 1  | 3.722373000  | -1.302014000 | 1.355731000  |
| 1  | 5.048605000  | -1.018546000 | 0.192332000  |
| 5  | 0.068971000  | 0.065716000  | 1.281226000  |
| 15 | -2.512342000 | -0.118331000 | -0.403434000 |
| 15 | 1.415896000  | -1.961973000 | -0.540942000 |
| 15 | 1.011986000  | 2.072267000  | -0.786433000 |
| 6  | 1.072341000  | -3.521034000 | -1.577704000 |
| 1  | 1.057870000  | -3.093697000 | -2.600194000 |
| 6  | -0.330390000 | -4.018051000 | -1.282013000 |
| 1  | -0.681454000 | -4.719014000 | -2.059852000 |
| 1  | -0.379887000 | -4.537031000 | -0.308121000 |
| 1  | -1.028508000 | -3.168404000 | -1.236782000 |
| 6  | 2.067910000  | -4.670699000 | -1.571336000 |
| 1  | 1.718549000  | -5.468655000 | -2.251736000 |
| 1  | 3.074176000  | -4.379313000 | -1.911713000 |
| 1  | 2.168935000  | -5.129984000 | -0.573357000 |
| 6  | -3.688801000 | 0.993481000  | -1.422588000 |
| 1  | -3.500169000 | 1.982060000  | -0.966702000 |
| 6  | -5.188624000 | 0.741417000  | -1.356144000 |
| 1  | -5.725280000 | 1.535221000  | -1.906969000 |
| 1  | -5.475183000 | -0.214544000 | -1.825513000 |
| 1  | -5.589168000 | 0.738600000  | -0.330449000 |
| 6  | -3.222086000 | 1.051249000  | -2.870477000 |
| 1  | -3.788971000 | 1.810973000  | -3.438847000 |
| 1  | -2.146399000 | 1.294391000  | -2.936872000 |
| 1  | -3.358494000 | 0.082847000  | -3.385149000 |
| 6  | 2.372340000  | 2.498159000  | -2.050382000 |
| 1  | 3.203092000  | 1.836369000  | -1.730476000 |
| 6  | 1.897134000  | 2.053027000  | -3.426493000 |
| 1  | 0.965638000  | 2.579688000  | -3.712548000 |
| 1  | 2.652678000  | 2.272816000  | -4.202431000 |
| 1  | 1.673103000  | 0.974668000  | -3.453119000 |
| 6  | 2.891025000  | 3.928183000  | -2.133124000 |
| 1  | 2.136816000  | 4.604091000  | -2.572479000 |
| 1  | 3.188955000  | 4.358618000  | -1.165260000 |
| 1  | 3.773297000  | 3.974065000  | -2.796703000 |

|   |              |              |              |
|---|--------------|--------------|--------------|
| 7 | -0.365551000 | -1.089144000 | -4.066725000 |
| 7 | -0.285781000 | -0.681373000 | -3.002535000 |

[2d''<sub>sc</sub>] (TE = -3332.141940)

|    |              |              |              |
|----|--------------|--------------|--------------|
| 6  | -0.905418000 | 1.272348000  | -1.082902000 |
| 6  | -1.972644000 | 1.328067000  | -1.987260000 |
| 1  | -2.311578000 | 0.393363000  | -2.449365000 |
| 6  | -2.586329000 | 2.543179000  | -2.350428000 |
| 1  | -3.424504000 | 2.542279000  | -3.055233000 |
| 6  | -2.106929000 | 3.747380000  | -1.822385000 |
| 1  | -2.562523000 | 4.700420000  | -2.115139000 |
| 6  | -1.066078000 | 3.732760000  | -0.903255000 |
| 1  | -0.710770000 | 4.664898000  | -0.447701000 |
| 6  | -0.478671000 | 2.504025000  | -0.508100000 |
| 6  | 1.141978000  | -0.061694000 | -1.519558000 |
| 6  | 1.329492000  | 0.572648000  | -2.756165000 |
| 1  | 0.518648000  | 1.200217000  | -3.143987000 |
| 6  | 2.493462000  | 0.390257000  | -3.517519000 |
| 1  | 2.600426000  | 0.900635000  | -4.480509000 |
| 6  | 3.509162000  | -0.449891000 | -3.051716000 |
| 1  | 4.414826000  | -0.609045000 | -3.647495000 |
| 6  | 3.380437000  | -1.058842000 | -1.809230000 |
| 1  | 4.188289000  | -1.679710000 | -1.404386000 |
| 6  | 2.215459000  | -0.852624000 | -1.039019000 |
| 6  | -0.999907000 | -1.212622000 | -1.086762000 |
| 6  | -0.850046000 | -1.941528000 | -2.277118000 |
| 1  | -0.071117000 | -1.630972000 | -2.981792000 |
| 6  | -1.665058000 | -3.036612000 | -2.594428000 |
| 1  | -1.507649000 | -3.576988000 | -3.533883000 |
| 6  | -2.670884000 | -3.435789000 | -1.712001000 |
| 1  | -3.310920000 | -4.293284000 | -1.946624000 |
| 6  | -2.837775000 | -2.751707000 | -0.513608000 |
| 1  | -3.588580000 | -3.081222000 | 0.212971000  |
| 6  | -2.013745000 | -1.650169000 | -0.197190000 |
| 16 | -2.016136000 | -1.066976000 | 1.494265000  |
| 16 | 0.402094000  | 2.449658000  | 1.040645000  |
| 16 | 2.263399000  | -1.255616000 | 0.699835000  |
| 23 | 0.248073000  | -0.008875000 | 1.414944000  |
| 6  | 2.135808000  | 3.132117000  | 0.778069000  |
| 1  | 1.998751000  | 4.228926000  | 0.829480000  |
| 6  | 2.114118000  | -3.119780000 | 0.856964000  |
| 1  | 3.114122000  | -3.500440000 | 0.575245000  |
| 6  | -3.449158000 | 0.165011000  | 1.690525000  |
| 1  | -3.907202000 | -0.198715000 | 2.628760000  |
| 6  | -4.444699000 | 0.062492000  | 0.560441000  |
| 1  | -5.282370000 | 0.758092000  | 0.744544000  |

|   |              |              |              |
|---|--------------|--------------|--------------|
| 1 | -3.973199000 | 0.348797000  | -0.395101000 |
| 1 | -4.859452000 | -0.951162000 | 0.449771000  |
| 6 | -2.940052000 | 1.573809000  | 1.888356000  |
| 1 | -2.564132000 | 1.995226000  | 0.940652000  |
| 1 | -3.757310000 | 2.223985000  | 2.249174000  |
| 1 | -2.119366000 | 1.613964000  | 2.625355000  |
| 6 | 2.939725000  | 2.656933000  | 1.969652000  |
| 1 | 2.459598000  | 2.923097000  | 2.926834000  |
| 1 | 3.042059000  | 1.556091000  | 1.940310000  |
| 1 | 3.951338000  | 3.097947000  | 1.959318000  |
| 6 | 2.761074000  | 2.753288000  | -0.538440000 |
| 1 | 2.112955000  | 3.012754000  | -1.390782000 |
| 1 | 3.724766000  | 3.279110000  | -0.660678000 |
| 1 | 2.952578000  | 1.668199000  | -0.585925000 |
| 6 | 1.849945000  | -3.373918000 | 2.326017000  |
| 1 | 1.848554000  | -4.456178000 | 2.539996000  |
| 1 | 2.601318000  | -2.893969000 | 2.975777000  |
| 1 | 0.858599000  | -2.966530000 | 2.599759000  |
| 6 | 1.053012000  | -3.718450000 | -0.028490000 |
| 1 | 0.055265000  | -3.341196000 | 0.256216000  |
| 1 | 1.209852000  | -3.472755000 | -1.090461000 |
| 1 | 1.049923000  | -4.817846000 | 0.077160000  |
| 6 | -0.169146000 | -0.000371000 | -0.782719000 |
| 7 | 0.878253000  | -0.004927000 | 4.450597000  |
| 7 | 0.628978000  | -0.007763000 | 3.341936000  |

$[2e''_{ssi}]$  (TE = -3583.496778)

|   |              |              |              |
|---|--------------|--------------|--------------|
| 6 | -1.285551000 | -0.737729000 | -1.997752000 |
| 6 | -1.528740000 | -0.588266000 | -3.372638000 |
| 1 | -0.989595000 | 0.185998000  | -3.934632000 |
| 6 | -2.436539000 | -1.396182000 | -4.055702000 |
| 1 | -2.599057000 | -1.255256000 | -5.129814000 |
| 6 | -3.129342000 | -2.394876000 | -3.368777000 |
| 1 | -3.837470000 | -3.041247000 | -3.898189000 |
| 6 | -2.903746000 | -2.576393000 | -2.006598000 |
| 1 | -3.421075000 | -3.376108000 | -1.463147000 |
| 6 | -2.005719000 | -1.745097000 | -1.330773000 |
| 6 | -0.766125000 | 2.072214000  | -0.855179000 |
| 6 | -1.025886000 | 2.890217000  | -1.967112000 |
| 1 | -0.816082000 | 2.507304000  | -2.974584000 |
| 6 | -1.544448000 | 4.177869000  | -1.834445000 |
| 1 | -1.735147000 | 4.787627000  | -2.724317000 |
| 6 | -1.831145000 | 4.684333000  | -0.566967000 |
| 1 | -2.250806000 | 5.689215000  | -0.453061000 |
| 6 | -1.595400000 | 3.895115000  | 0.558124000  |
| 1 | -1.837284000 | 4.272084000  | 1.558503000  |

|    |              |              |              |
|----|--------------|--------------|--------------|
| 6  | -1.055794000 | 2.614827000  | 0.408708000  |
| 6  | 1.654117000  | 0.375035000  | -1.709643000 |
| 6  | 1.971512000  | 0.905144000  | -2.968663000 |
| 1  | 1.162818000  | 1.202120000  | -3.649722000 |
| 6  | 3.292761000  | 1.090943000  | -3.381094000 |
| 1  | 3.507504000  | 1.526689000  | -4.362974000 |
| 6  | 4.336542000  | 0.746859000  | -2.524694000 |
| 1  | 5.376627000  | 0.916430000  | -2.823572000 |
| 6  | 4.053259000  | 0.195885000  | -1.274721000 |
| 1  | 4.869332000  | -0.054831000 | -0.588976000 |
| 6  | 2.725422000  | -0.011472000 | -0.883501000 |
| 16 | 2.389410000  | -0.647909000 | 0.815442000  |
| 16 | -1.689354000 | -2.060147000 | 0.444105000  |
| 16 | -0.780781000 | 1.626101000  | 1.910991000  |
| 23 | 0.049881000  | -0.640344000 | 1.369823000  |
| 6  | -3.405081000 | -1.680870000 | 1.115533000  |
| 1  | -4.074444000 | -2.446561000 | 0.681003000  |
| 6  | 0.541841000  | 2.674949000  | 2.735055000  |
| 1  | 0.046328000  | 3.628051000  | 2.998043000  |
| 6  | 2.902188000  | -2.449179000 | 0.594877000  |
| 1  | 2.631281000  | -2.819306000 | 1.600983000  |
| 6  | 4.384956000  | -2.646207000 | 0.366414000  |
| 1  | 4.644557000  | -3.716157000 | 0.463494000  |
| 1  | 4.679380000  | -2.330955000 | -0.649084000 |
| 1  | 4.991161000  | -2.082171000 | 1.094165000  |
| 6  | 2.053084000  | -3.143483000 | -0.444522000 |
| 1  | 2.223093000  | -2.715222000 | -1.449015000 |
| 1  | 2.297520000  | -4.219749000 | -0.489572000 |
| 1  | 0.980405000  | -3.038143000 | -0.207870000 |
| 6  | -3.308424000 | -1.855253000 | 2.615710000  |
| 1  | -2.934582000 | -2.854026000 | 2.895038000  |
| 1  | -2.600296000 | -1.113671000 | 3.028627000  |
| 1  | -4.294130000 | -1.701956000 | 3.088088000  |
| 6  | -3.866941000 | -0.292672000 | 0.735249000  |
| 1  | -3.912565000 | -0.148357000 | -0.356412000 |
| 1  | -4.872403000 | -0.094824000 | 1.148202000  |
| 1  | -3.174800000 | 0.462314000  | 1.147722000  |
| 6  | 0.937423000  | 1.923151000  | 3.987932000  |
| 1  | 1.699762000  | 2.486163000  | 4.553146000  |
| 1  | 0.075253000  | 1.743373000  | 4.650887000  |
| 1  | 1.361812000  | 0.939461000  | 3.713181000  |
| 6  | 1.718396000  | 2.918780000  | 1.820059000  |
| 1  | 2.163740000  | 1.955745000  | 1.514751000  |
| 1  | 1.432861000  | 3.464073000  | 0.906012000  |
| 1  | 2.493049000  | 3.507284000  | 2.342750000  |
| 7  | 0.399002000  | -2.674080000 | 3.646140000  |



|    |              |              |              |
|----|--------------|--------------|--------------|
| 7  | 0.270777000  | -1.873770000 | 2.827259000  |
| 14 | -0.080471000 | 0.265922000  | -0.867663000 |

[2f'<sub>SB</sub>]' (TE = -3318.940864)

|    |              |              |              |
|----|--------------|--------------|--------------|
| 6  | 0.764441000  | -0.656022000 | -1.991020000 |
| 6  | 1.547983000  | -0.369325000 | -3.124080000 |
| 1  | 1.536927000  | 0.658098000  | -3.511437000 |
| 6  | 2.323887000  | -1.335536000 | -3.762877000 |
| 1  | 2.921068000  | -1.067003000 | -4.641703000 |
| 6  | 2.325355000  | -2.650747000 | -3.296299000 |
| 1  | 2.918382000  | -3.421643000 | -3.799570000 |
| 6  | 1.571836000  | -2.979526000 | -2.167287000 |
| 1  | 1.579265000  | -4.009569000 | -1.794754000 |
| 6  | 0.847119000  | -1.982542000 | -1.513957000 |
| 6  | -1.736131000 | 0.168321000  | -1.505155000 |
| 6  | -2.250683000 | -0.469842000 | -2.657608000 |
| 1  | -1.535174000 | -0.911846000 | -3.363319000 |
| 6  | -3.609840000 | -0.528245000 | -2.945769000 |
| 1  | -3.952796000 | -1.032738000 | -3.856513000 |
| 6  | -4.536125000 | 0.095279000  | -2.104295000 |
| 1  | -5.604285000 | 0.095501000  | -2.344408000 |
| 6  | -4.077536000 | 0.713254000  | -0.941160000 |
| 1  | -4.785857000 | 1.211483000  | -0.272212000 |
| 6  | -2.719739000 | 0.670613000  | -0.616787000 |
| 6  | 0.313476000  | 1.882931000  | -1.154807000 |
| 6  | -0.393170000 | 3.006924000  | -1.636462000 |
| 1  | -1.354717000 | 2.835960000  | -2.138147000 |
| 6  | 0.079715000  | 4.311421000  | -1.505301000 |
| 1  | -0.513468000 | 5.147384000  | -1.893754000 |
| 6  | 1.312023000  | 4.554856000  | -0.900782000 |
| 1  | 1.696275000  | 5.574696000  | -0.795928000 |
| 6  | 2.051778000  | 3.475919000  | -0.402495000 |
| 1  | 3.008200000  | 3.670946000  | 0.091651000  |
| 6  | 1.539149000  | 2.185115000  | -0.498930000 |
| 23 | 0.060408000  | 0.020773000  | 1.133479000  |
| 5  | -0.186784000 | 0.380383000  | -1.242610000 |
| 6  | -3.164809000 | 0.351154000  | 2.231263000  |
| 1  | -2.549670000 | 0.538446000  | 3.130813000  |
| 6  | -3.211050000 | -1.136594000 | 1.963465000  |
| 1  | -3.793274000 | -1.647178000 | 2.750483000  |
| 1  | -3.685883000 | -1.354163000 | 0.990702000  |
| 1  | -2.195914000 | -1.568305000 | 1.943667000  |
| 6  | -4.538166000 | 0.953845000  | 2.455921000  |
| 1  | -4.971689000 | 0.558153000  | 3.391432000  |
| 1  | -4.495029000 | 2.051461000  | 2.537350000  |
| 1  | -5.236267000 | 0.693271000  | 1.643915000  |

|    |              |              |              |
|----|--------------|--------------|--------------|
| 6  | 0.989586000  | -3.554788000 | 0.865210000  |
| 1  | 1.977118000  | -3.486265000 | 0.373934000  |
| 6  | 0.384693000  | -4.931468000 | 0.676533000  |
| 1  | 0.998479000  | -5.706887000 | 1.169372000  |
| 1  | -0.625180000 | -4.968291000 | 1.121199000  |
| 1  | 0.283329000  | -5.199534000 | -0.387355000 |
| 6  | 1.124074000  | -3.182551000 | 2.326259000  |
| 1  | 1.720261000  | -3.938289000 | 2.867155000  |
| 1  | 1.607892000  | -2.198146000 | 2.440970000  |
| 1  | 0.135038000  | -3.119628000 | 2.816784000  |
| 6  | 3.426441000  | 1.440857000  | 1.543732000  |
| 1  | 2.910439000  | 2.342292000  | 1.923171000  |
| 6  | 3.554719000  | 0.411578000  | 2.649568000  |
| 1  | 3.929920000  | -0.546879000 | 2.245804000  |
| 1  | 4.276766000  | 0.754739000  | 3.410453000  |
| 1  | 2.592875000  | 0.218983000  | 3.147666000  |
| 6  | 4.785124000  | 1.785056000  | 0.961017000  |
| 1  | 5.279345000  | 0.868841000  | 0.594271000  |
| 1  | 4.720176000  | 2.481446000  | 0.111087000  |
| 1  | 5.438320000  | 2.238696000  | 1.727780000  |
| 7  | 0.049851000  | 0.041458000  | 4.221108000  |
| 7  | 0.082806000  | 0.031088000  | 3.072904000  |
| 16 | -2.132266000 | 1.277870000  | 0.977776000  |
| 16 | -0.056203000 | -2.257976000 | 0.020781000  |
| 16 | 2.323479000  | 0.728157000  | 0.236881000  |

Cartesian coordinates of  $[3a'_{PC}]-[3f'_{SB}]$ ,  $[3a''_{PC}]-[3f''_{SB}]$  and  $\{[HIPTN_3N]-V-N=NH\}^+$  along with their total energies (in hartree) including zero point vibrational correction at M06-L-D3(heptane)/6-311+G\* level of theory.

$[3a'_{PC}]$  (TE = -3062.515879)

|   |              |              |              |
|---|--------------|--------------|--------------|
| 6 | -0.654179000 | 1.912782000  | 2.008941000  |
| 6 | 0.163412000  | 0.808433000  | 2.677218000  |
| 6 | -2.297817000 | -1.060571000 | 2.045521000  |
| 6 | -0.902085000 | -1.473937000 | 2.487711000  |
| 6 | 2.812180000  | -0.718647000 | 1.811750000  |
| 6 | 1.536499000  | -1.239149000 | 2.465531000  |
| 1 | -2.568051000 | -0.084970000 | 2.460775000  |
| 1 | -0.879696000 | -1.537284000 | 3.591288000  |
| 1 | 3.695498000  | -1.296672000 | 2.106048000  |
| 1 | 1.632240000  | -1.142778000 | 3.561870000  |
| 1 | -0.577043000 | 2.860039000  | 2.555240000  |
| 1 | 1.183785000  | 1.201248000  | 2.797785000  |
| 6 | -1.081341000 | 3.425227000  | -0.546637000 |
| 1 | -0.384602000 | 4.272148000  | -0.611522000 |
| 6 | -2.689468000 | -2.676949000 | -0.329630000 |

|    |              |              |              |
|----|--------------|--------------|--------------|
| 1  | -1.957125000 | -3.262608000 | 0.250917000  |
| 6  | 4.009486000  | 0.006329000  | -0.813582000 |
| 1  | 3.999505000  | 1.042470000  | -0.441934000 |
| 23 | 0.091839000  | -0.320562000 | -0.351084000 |
| 6  | 0.235061000  | -0.572391000 | 1.975238000  |
| 1  | -1.723676000 | 1.676826000  | 1.968906000  |
| 1  | -0.198988000 | 0.680621000  | 3.712762000  |
| 1  | 1.477948000  | -2.322498000 | 2.294678000  |
| 1  | 3.017125000  | 0.321961000  | 2.096116000  |
| 1  | -0.723198000 | -2.508409000 | 2.151525000  |
| 1  | -3.069058000 | -1.757528000 | 2.392514000  |
| 6  | 5.336227000  | -0.633316000 | -0.424558000 |
| 1  | 6.169870000  | -0.055426000 | -0.835730000 |
| 1  | 5.483522000  | -0.687774000 | 0.657221000  |
| 1  | 5.426844000  | -1.645910000 | -0.829348000 |
| 6  | 3.828954000  | 0.036561000  | -2.326569000 |
| 1  | 3.878288000  | -0.968066000 | -2.759750000 |
| 1  | 2.872607000  | 0.475788000  | -2.623175000 |
| 1  | 4.623551000  | 0.621518000  | -2.799100000 |
| 6  | -4.085230000 | -3.153459000 | 0.053720000  |
| 1  | -4.177918000 | -4.229737000 | -0.123907000 |
| 1  | -4.331745000 | -2.978691000 | 1.104075000  |
| 1  | -4.853787000 | -2.668042000 | -0.554945000 |
| 6  | -2.418152000 | -2.924785000 | -1.811326000 |
| 1  | -3.196761000 | -2.493585000 | -2.444789000 |
| 1  | -1.468261000 | -2.505592000 | -2.151673000 |
| 1  | -2.400420000 | -3.999437000 | -2.018205000 |
| 6  | -1.468772000 | 3.030791000  | -1.966075000 |
| 1  | -0.596225000 | 2.796452000  | -2.582452000 |
| 1  | -2.117099000 | 2.149610000  | -1.983560000 |
| 1  | -2.008376000 | 3.846369000  | -2.457763000 |
| 6  | -2.278261000 | 3.893457000  | 0.271213000  |
| 1  | -1.995817000 | 4.252817000  | 1.263970000  |
| 1  | -2.776711000 | 4.720385000  | -0.243972000 |
| 1  | -3.031583000 | 3.111103000  | 0.407599000  |
| 6  | 2.519991000  | -2.560837000 | -0.464848000 |
| 1  | 2.912006000  | -2.576009000 | -1.492137000 |
| 6  | 1.060671000  | -3.017303000 | -0.520515000 |
| 1  | 0.569229000  | -2.954958000 | 0.457670000  |
| 1  | 0.477239000  | -2.436714000 | -1.255398000 |
| 1  | 0.960644000  | -4.056332000 | -0.852299000 |
| 6  | 3.365994000  | -3.484633000 | 0.398832000  |
| 1  | 3.356425000  | -4.500138000 | -0.010100000 |
| 1  | 4.409545000  | -3.169810000 | 0.460058000  |
| 1  | 2.983697000  | -3.551797000 | 1.421289000  |
| 6  | -3.628097000 | 0.225415000  | -0.275597000 |

|    |              |              |              |
|----|--------------|--------------|--------------|
| 1  | -3.139209000 | 1.199216000  | -0.121377000 |
| 6  | -4.873183000 | 0.192299000  | 0.601573000  |
| 1  | -5.425967000 | -0.744933000 | 0.504665000  |
| 1  | -4.647792000 | 0.334334000  | 1.661687000  |
| 1  | -5.555620000 | 0.997081000  | 0.308233000  |
| 6  | -3.964156000 | 0.110099000  | -1.757811000 |
| 1  | -4.565437000 | -0.780892000 | -1.961777000 |
| 1  | -4.557278000 | 0.970988000  | -2.082397000 |
| 1  | -3.074395000 | 0.062544000  | -2.393615000 |
| 6  | 1.615178000  | 2.831348000  | 0.396284000  |
| 1  | 2.230776000  | 2.039400000  | 0.846983000  |
| 6  | 1.683348000  | 4.062034000  | 1.288175000  |
| 1  | 2.699691000  | 4.468444000  | 1.300150000  |
| 1  | 1.027899000  | 4.865461000  | 0.935390000  |
| 1  | 1.412212000  | 3.844808000  | 2.324436000  |
| 6  | 2.139262000  | 3.104737000  | -1.008870000 |
| 1  | 3.193471000  | 3.398467000  | -0.985155000 |
| 1  | 2.051567000  | 2.225670000  | -1.656352000 |
| 1  | 1.597022000  | 3.923819000  | -1.492947000 |
| 15 | -2.271528000 | -0.942811000 | 0.211929000  |
| 15 | -0.081485000 | 2.074325000  | 0.277906000  |
| 15 | 2.530222000  | -0.750206000 | 0.004380000  |
| 7  | -0.296462000 | -0.007161000 | -3.357224000 |
| 7  | -0.054570000 | -0.099069000 | -2.165375000 |
| 1  | 0.553297000  | 0.212704000  | -3.922689000 |

**[3b'<sub>psi</sub>]-Triplet (TE = -3313.941683)**

|   |              |              |              |
|---|--------------|--------------|--------------|
| 6 | -0.360363000 | 2.264953000  | 2.068660000  |
| 6 | 0.226208000  | 1.139828000  | 2.915951000  |
| 6 | -2.714140000 | -0.591117000 | 2.036981000  |
| 6 | -1.579206000 | -1.332697000 | 2.738361000  |
| 6 | 2.748352000  | -1.408896000 | 1.742826000  |
| 6 | 1.567943000  | -1.614552000 | 2.693244000  |
| 1 | -2.775837000 | 0.445542000  | 2.392439000  |
| 1 | -1.689312000 | -1.259923000 | 3.827605000  |
| 1 | 3.510427000  | -2.193501000 | 1.828823000  |
| 1 | 1.866414000  | -1.347407000 | 3.714649000  |
| 1 | -0.179049000 | 3.264419000  | 2.486099000  |
| 1 | 1.292915000  | 1.331796000  | 3.099172000  |
| 6 | -0.342276000 | 3.683745000  | -0.510722000 |
| 1 | 0.332516000  | 4.494891000  | -0.198192000 |
| 6 | -2.656998000 | -2.284395000 | -0.338314000 |
| 1 | -1.689760000 | -2.758545000 | -0.097704000 |
| 6 | 3.801904000  | -0.636861000 | -0.845596000 |
| 1 | 3.920753000  | 0.383240000  | -0.454040000 |

|    |              |              |              |
|----|--------------|--------------|--------------|
| 23 | -0.002884000 | -0.164465000 | -0.479348000 |
| 1  | -1.449864000 | 2.165827000  | 1.987673000  |
| 1  | -0.239190000 | 1.137183000  | 3.910882000  |
| 1  | 1.293721000  | -2.672996000 | 2.737279000  |
| 1  | 3.268799000  | -0.469051000 | 1.978447000  |
| 1  | -1.623153000 | -2.405252000 | 2.504009000  |
| 1  | -3.702733000 | -1.028444000 | 2.221758000  |
| 6  | 5.040581000  | -1.436495000 | -0.459996000 |
| 1  | 5.917291000  | -1.044479000 | -0.985350000 |
| 1  | 5.260196000  | -1.389855000 | 0.608655000  |
| 1  | 4.956661000  | -2.492337000 | -0.737432000 |
| 6  | 3.638858000  | -0.553135000 | -2.356881000 |
| 1  | 3.625559000  | -1.547345000 | -2.816062000 |
| 1  | 2.715948000  | -0.039301000 | -2.644980000 |
| 1  | 4.476036000  | -0.009984000 | -2.805751000 |
| 6  | -3.729639000 | -3.068629000 | 0.407712000  |
| 1  | -3.754664000 | -4.099058000 | 0.038312000  |
| 1  | -3.546735000 | -3.121138000 | 1.483426000  |
| 1  | -4.728636000 | -2.652874000 | 0.260141000  |
| 6  | -2.849244000 | -2.362967000 | -1.850389000 |
| 1  | -3.848422000 | -2.027408000 | -2.143908000 |
| 1  | -2.127889000 | -1.757288000 | -2.408994000 |
| 1  | -2.749951000 | -3.397131000 | -2.194992000 |
| 6  | -0.287412000 | 3.554865000  | -2.029016000 |
| 1  | 0.680382000  | 3.216822000  | -2.405300000 |
| 1  | -1.038386000 | 2.848283000  | -2.391423000 |
| 1  | -0.501913000 | 4.521026000  | -2.496429000 |
| 6  | -1.755114000 | 4.039947000  | -0.065388000 |
| 1  | -1.826509000 | 4.270826000  | 0.999585000  |
| 1  | -2.108841000 | 4.919298000  | -0.612384000 |
| 1  | -2.460168000 | 3.230556000  | -0.284162000 |
| 6  | 1.992383000  | -2.959861000 | -0.700853000 |
| 1  | 2.984041000  | -3.309790000 | -1.020521000 |
| 6  | 1.075415000  | -2.914044000 | -1.920476000 |
| 1  | 0.051215000  | -2.619410000 | -1.643662000 |
| 1  | 1.414009000  | -2.221727000 | -2.694429000 |
| 1  | 0.982518000  | -3.904478000 | -2.378030000 |
| 6  | 1.448180000  | -3.932542000 | 0.335297000  |
| 1  | 1.293310000  | -4.917316000 | -0.116692000 |
| 1  | 2.121622000  | -4.068051000 | 1.184385000  |
| 1  | 0.478415000  | -3.603118000 | 0.729062000  |
| 6  | -3.765754000 | 0.567630000  | -0.408707000 |
| 1  | -3.660895000 | 1.442482000  | 0.254129000  |
| 6  | -5.170120000 | 0.008310000  | -0.216651000 |
| 1  | -5.368125000 | -0.826528000 | -0.895103000 |
| 1  | -5.362550000 | -0.334455000 | 0.803252000  |

|    |              |              |              |
|----|--------------|--------------|--------------|
| 1  | -5.913681000 | 0.779228000  | -0.443419000 |
| 6  | -3.538227000 | 1.036726000  | -1.839441000 |
| 1  | -3.681620000 | 0.232365000  | -2.565544000 |
| 1  | -4.246578000 | 1.830904000  | -2.096350000 |
| 1  | -2.528343000 | 1.424746000  | -1.990309000 |
| 6  | 2.122068000  | 2.514997000  | 0.582496000  |
| 1  | 2.516238000  | 1.576391000  | 1.003628000  |
| 6  | 2.421866000  | 3.642599000  | 1.560790000  |
| 1  | 3.502075000  | 3.806587000  | 1.628922000  |
| 1  | 1.979897000  | 4.592407000  | 1.242066000  |
| 1  | 2.063810000  | 3.434188000  | 2.571773000  |
| 6  | 2.791511000  | 2.756485000  | -0.765628000 |
| 1  | 3.881517000  | 2.765662000  | -0.662365000 |
| 1  | 2.533118000  | 1.989757000  | -1.504575000 |
| 1  | 2.508550000  | 3.728199000  | -1.182029000 |
| 15 | -2.388436000 | -0.514865000 | 0.220548000  |
| 15 | 0.303242000  | 2.161380000  | 0.356703000  |
| 15 | 2.234924000  | -1.227899000 | -0.027182000 |
| 14 | 0.064316000  | -0.599411000 | 2.112255000  |
| 7  | -0.334694000 | 0.393511000  | -3.452999000 |
| 7  | -0.093881000 | 0.243739000  | -2.266518000 |
| 1  | 0.534159000  | 0.436653000  | -4.032560000 |

**[3c'<sub>PB</sub>]-Quartet (TE = -3049.279552)**

|    |              |              |              |
|----|--------------|--------------|--------------|
| 6  | -0.476204000 | 2.330554000  | 2.055904000  |
| 6  | 0.430885000  | 1.433746000  | 2.897763000  |
| 6  | -2.161709000 | -0.705609000 | 2.093429000  |
| 6  | -0.787655000 | -1.082643000 | 2.649556000  |
| 6  | 2.909308000  | -0.411047000 | 1.726434000  |
| 6  | 1.882719000  | -0.835484000 | 2.783968000  |
| 1  | -2.427852000 | 0.330106000  | 2.324197000  |
| 1  | -0.891200000 | -1.274052000 | 3.736546000  |
| 1  | 3.893351000  | -0.848561000 | 1.929530000  |
| 1  | 2.303617000  | -0.571755000 | 3.767508000  |
| 1  | -0.396091000 | 3.381804000  | 2.356431000  |
| 1  | 1.450888000  | 1.844545000  | 2.879802000  |
| 6  | -1.176227000 | 3.359361000  | -0.645397000 |
| 1  | -0.553947000 | 4.254652000  | -0.781981000 |
| 6  | -2.537731000 | -2.740316000 | 0.070239000  |
| 1  | -1.751878000 | -3.167865000 | 0.714862000  |
| 6  | 3.714313000  | -0.077238000 | -1.060637000 |
| 1  | 3.662858000  | 0.990666000  | -0.801127000 |
| 23 | -0.009825000 | -0.205023000 | -0.694053000 |
| 1  | -1.530748000 | 2.069053000  | 2.179907000  |
| 1  | 0.131223000  | 1.539255000  | 3.955795000  |

|   |              |              |              |
|---|--------------|--------------|--------------|
| 1 | 1.798759000  | -1.930469000 | 2.793494000  |
| 1 | 3.056415000  | 0.676330000  | 1.747064000  |
| 1 | -0.499957000 | -2.074517000 | 2.271030000  |
| 1 | -2.954132000 | -1.317073000 | 2.541641000  |
| 6 | 5.127872000  | -0.569731000 | -0.782080000 |
| 1 | 5.849008000  | 0.022063000  | -1.354749000 |
| 1 | 5.412957000  | -0.490710000 | 0.270360000  |
| 1 | 5.259876000  | -1.610661000 | -1.092101000 |
| 6 | 3.362427000  | -0.231293000 | -2.535750000 |
| 1 | 3.360585000  | -1.283166000 | -2.843400000 |
| 1 | 2.376291000  | 0.176890000  | -2.775216000 |
| 1 | 4.098359000  | 0.281297000  | -3.162754000 |
| 6 | -3.888490000 | -3.218412000 | 0.588556000  |
| 1 | -3.905129000 | -4.311877000 | 0.637654000  |
| 1 | -4.129959000 | -2.848763000 | 1.588566000  |
| 1 | -4.700618000 | -2.922836000 | -0.082209000 |
| 6 | -2.293443000 | -3.242519000 | -1.348756000 |
| 1 | -3.051916000 | -2.881843000 | -2.048238000 |
| 1 | -1.323601000 | -2.935572000 | -1.743966000 |
| 1 | -2.331919000 | -4.336231000 | -1.371119000 |
| 6 | -1.530749000 | 2.819298000  | -2.027160000 |
| 1 | -0.645934000 | 2.532264000  | -2.603660000 |
| 1 | -2.167411000 | 1.930498000  | -1.968535000 |
| 1 | -2.072331000 | 3.571652000  | -2.609218000 |
| 6 | -2.410930000 | 3.781209000  | 0.139503000  |
| 1 | -2.161965000 | 4.290898000  | 1.073546000  |
| 1 | -3.014093000 | 4.473554000  | -0.456015000 |
| 1 | -3.060951000 | 2.936456000  | 0.390869000  |
| 6 | 2.656024000  | -2.687185000 | -0.134739000 |
| 1 | 3.005513000  | -2.815708000 | -1.170393000 |
| 6 | 1.338750000  | -3.441838000 | 0.011031000  |
| 1 | 0.906098000  | -3.308414000 | 1.009813000  |
| 1 | 0.595108000  | -3.116978000 | -0.722654000 |
| 1 | 1.489357000  | -4.517165000 | -0.129025000 |
| 6 | 3.706508000  | -3.257542000 | 0.811017000  |
| 1 | 3.881449000  | -4.312981000 | 0.579573000  |
| 1 | 4.671241000  | -2.751104000 | 0.752148000  |
| 1 | 3.375348000  | -3.215255000 | 1.853248000  |
| 6 | -3.708823000 | 0.053866000  | -0.284742000 |
| 1 | -3.311450000 | 1.079011000  | -0.271025000 |
| 6 | -4.915842000 | 0.023755000  | 0.644606000  |
| 1 | -5.410655000 | -0.949212000 | 0.657997000  |
| 1 | -4.664100000 | 0.282097000  | 1.676744000  |
| 1 | -5.659066000 | 0.752889000  | 0.305144000  |
| 6 | -4.079800000 | -0.274093000 | -1.726281000 |
| 1 | -4.577696000 | -1.245682000 | -1.799544000 |

|    |              |              |              |
|----|--------------|--------------|--------------|
| 1  | -4.780711000 | 0.469533000  | -2.118199000 |
| 1  | -3.211577000 | -0.295123000 | -2.392965000 |
| 6  | 1.602195000  | 2.947690000  | 0.108488000  |
| 1  | 2.291278000  | 2.226673000  | 0.571292000  |
| 6  | 1.738752000  | 4.276134000  | 0.837531000  |
| 1  | 2.723572000  | 4.715498000  | 0.649122000  |
| 1  | 0.997782000  | 5.010841000  | 0.504197000  |
| 1  | 1.636135000  | 4.173707000  | 1.920888000  |
| 6  | 1.966575000  | 3.067340000  | -1.367494000 |
| 1  | 3.011861000  | 3.369060000  | -1.489206000 |
| 1  | 1.831971000  | 2.123167000  | -1.908751000 |
| 1  | 1.359965000  | 3.823686000  | -1.875881000 |
| 15 | -2.217823000 | -0.911271000 | 0.259215000  |
| 15 | -0.077082000 | 2.145312000  | 0.269576000  |
| 15 | 2.391561000  | -0.837025000 | 0.006467000  |
| 5  | 0.469040000  | -0.131286000 | 2.667035000  |
| 7  | -0.577874000 | -0.664770000 | -3.612651000 |
| 7  | -0.254831000 | -0.693469000 | -2.425730000 |
| 1  | 0.203532000  | -0.978190000 | -4.229117000 |

**[3d'<sub>SC</sub>]-Triplet (TE = -2877.659059)**

|    |              |              |              |
|----|--------------|--------------|--------------|
| 6  | -0.195305000 | 1.417693000  | -2.254750000 |
| 6  | -0.155121000 | -0.040766000 | -2.688439000 |
| 6  | 2.762371000  | -0.201691000 | -1.636008000 |
| 6  | 1.841611000  | -1.368736000 | -1.903533000 |
| 6  | -1.843596000 | -2.293077000 | -1.281753000 |
| 6  | -0.418455000 | -2.370012000 | -1.786194000 |
| 1  | 2.524541000  | 0.667254000  | -2.256541000 |
| 1  | 2.000867000  | -1.699015000 | -2.946914000 |
| 1  | -2.376813000 | -3.242946000 | -1.372703000 |
| 1  | -0.451879000 | -2.713678000 | -2.835907000 |
| 1  | -0.703577000 | 2.053842000  | -2.985371000 |
| 1  | -1.174258000 | -0.310159000 | -2.995583000 |
| 6  | -0.829181000 | 3.171770000  | -0.012785000 |
| 1  | -1.435884000 | 3.145509000  | 0.900989000  |
| 6  | 3.294855000  | -1.015999000 | 1.081938000  |
| 1  | 2.567327000  | -1.841255000 | 1.037439000  |
| 6  | -3.436477000 | -0.913112000 | 0.637960000  |
| 1  | -3.446329000 | -0.225160000 | -0.216575000 |
| 23 | 0.162545000  | -0.273815000 | 0.434458000  |
| 16 | 2.574893000  | 0.396165000  | 0.087432000  |
| 16 | -1.124042000 | 1.464216000  | -0.680223000 |
| 16 | -1.811420000 | -1.804503000 | 0.487485000  |
| 6  | 0.361766000  | -1.056679000 | -1.642526000 |
| 1  | 0.796854000  | 1.840835000  | -2.070996000 |
| 1  | 0.436016000  | -0.095531000 | -3.618063000 |



|   |              |              |              |
|---|--------------|--------------|--------------|
| 1 | 0.101435000  | -3.175379000 | -1.246920000 |
| 1 | -2.427993000 | -1.526857000 | -1.804704000 |
| 1 | 2.163949000  | -2.223106000 | -1.288702000 |
| 1 | 3.820343000  | -0.416438000 | -1.805704000 |
| 6 | -4.568535000 | -1.913185000 | 0.524001000  |
| 1 | -5.527747000 | -1.387522000 | 0.563114000  |
| 1 | -4.543419000 | -2.470959000 | -0.415299000 |
| 1 | -4.552530000 | -2.633470000 | 1.346554000  |
| 6 | -3.458795000 | -0.127577000 | 1.930789000  |
| 1 | -3.322622000 | -0.772394000 | 2.804523000  |
| 1 | -2.688641000 | 0.645515000  | 1.961178000  |
| 1 | -4.430021000 | 0.363477000  | 2.041245000  |
| 6 | 4.617279000  | -1.484371000 | 0.514429000  |
| 1 | 5.052017000  | -2.230246000 | 1.186324000  |
| 1 | 4.521028000  | -1.956985000 | -0.464850000 |
| 1 | 5.333045000  | -0.661262000 | 0.432000000  |
| 6 | 3.420501000  | -0.520489000 | 2.510066000  |
| 1 | 4.148276000  | 0.292125000  | 2.584051000  |
| 1 | 2.469672000  | -0.160861000 | 2.909402000  |
| 1 | 3.765338000  | -1.333344000 | 3.155140000  |
| 6 | 0.618006000  | 3.432021000  | 0.344883000  |
| 1 | 0.993421000  | 2.734467000  | 1.095695000  |
| 1 | 1.276387000  | 3.381455000  | -0.528159000 |
| 1 | 0.715633000  | 4.442200000  | 0.754360000  |
| 6 | -1.397131000 | 4.194292000  | -0.978325000 |
| 1 | -2.435518000 | 3.985674000  | -1.244622000 |
| 1 | -1.363326000 | 5.188336000  | -0.523214000 |
| 1 | -0.811926000 | 4.246365000  | -1.901295000 |
| 7 | -0.364846000 | 0.940056000  | 3.183205000  |
| 7 | -0.054904000 | 0.386285000  | 2.147359000  |
| 1 | 0.292412000  | 0.748352000  | 3.969980000  |

**[3e'<sub>ssi</sub>]-Triplet (TE = -3129.076381)**

|   |              |              |             |
|---|--------------|--------------|-------------|
| 6 | -0.682770000 | -0.034513000 | 2.543607000 |
| 6 | -0.142037000 | -1.454400000 | 2.518668000 |
| 6 | -2.548586000 | -2.429440000 | 0.035773000 |
| 6 | -1.327211000 | -3.282066000 | 0.314388000 |
| 6 | 2.875052000  | -1.847125000 | 0.496857000 |
| 6 | 1.831211000  | -2.938530000 | 0.632483000 |
| 1 | -2.962241000 | -1.998568000 | 0.953166000 |
| 1 | -1.555087000 | -3.986374000 | 1.123264000 |
| 1 | 3.877580000  | -2.229264000 | 0.283454000 |
| 1 | 2.069885000  | -3.545794000 | 1.514326000 |
| 1 | -0.690987000 | 0.411430000  | 3.543541000 |
| 1 | 0.807623000  | -1.492737000 | 3.067761000 |
| 6 | -0.354330000 | 2.690410000  | 1.590897000 |

|    |              |              |              |
|----|--------------|--------------|--------------|
| 1  | 0.216529000  | 3.227252000  | 0.822839000  |
| 6  | -3.643192000 | -0.216210000 | -1.498572000 |
| 1  | -4.165673000 | -0.983527000 | -2.083711000 |
| 6  | 3.730414000  | 0.600746000  | -0.631330000 |
| 1  | 3.763575000  | 0.732447000  | 0.457735000  |
| 23 | 0.080875000  | 0.028715000  | -0.744125000 |
| 16 | -2.033355000 | -1.037753000 | -1.058977000 |
| 16 | 0.408982000  | 0.999004000  | 1.484374000  |
| 16 | 2.432059000  | -0.710996000 | -0.890731000 |
| 1  | -1.696754000 | 0.024303000  | 2.132540000  |
| 1  | -0.831714000 | -2.102140000 | 3.074960000  |
| 1  | 1.878501000  | -3.615652000 | -0.228395000 |
| 1  | 2.936649000  | -1.225658000 | 1.398716000  |
| 1  | -1.079108000 | -3.883476000 | -0.567288000 |
| 1  | -3.357429000 | -2.952047000 | -0.485469000 |
| 6  | 5.066609000  | 0.101124000  | -1.145440000 |
| 1  | 5.845313000  | 0.839471000  | -0.930059000 |
| 1  | 5.375993000  | -0.837832000 | -0.681454000 |
| 1  | 5.045075000  | -0.050280000 | -2.228119000 |
| 6  | 3.299940000  | 1.894351000  | -1.287935000 |
| 1  | 3.100629000  | 1.762939000  | -2.356821000 |
| 1  | 2.404211000  | 2.308907000  | -0.820025000 |
| 1  | 4.100057000  | 2.634682000  | -1.196599000 |
| 6  | -4.449429000 | 0.140666000  | -0.267904000 |
| 1  | -5.381929000 | 0.627893000  | -0.569593000 |
| 1  | -4.724577000 | -0.732279000 | 0.327850000  |
| 1  | -3.909001000 | 0.839517000  | 0.376968000  |
| 6  | -3.330355000 | 0.978220000  | -2.372963000 |
| 1  | -2.798178000 | 1.757266000  | -1.820070000 |
| 1  | -2.721976000 | 0.713329000  | -3.241451000 |
| 1  | -4.261992000 | 1.415480000  | -2.743098000 |
| 6  | -1.822457000 | 2.686283000  | 1.222342000  |
| 1  | -2.004855000 | 2.179582000  | 0.270460000  |
| 1  | -2.432339000 | 2.205814000  | 1.993464000  |
| 1  | -2.184750000 | 3.714310000  | 1.125688000  |
| 6  | -0.080072000 | 3.304885000  | 2.949647000  |
| 1  | 0.984242000  | 3.316463000  | 3.192927000  |
| 1  | -0.437361000 | 4.339015000  | 2.966435000  |
| 1  | -0.605253000 | 2.774978000  | 3.749644000  |
| 14 | 0.120200000  | -2.123231000 | 0.735714000  |
| 7  | -0.273282000 | 2.706452000  | -2.158033000 |
| 7  | -0.041562000 | 1.646976000  | -1.608162000 |
| 1  | 0.596608000  | 3.230867000  | -2.403123000 |

[3f<sub>SB</sub>]-Quartet (TE = -2864.418883)

|   |             |             |             |
|---|-------------|-------------|-------------|
| 6 | 0.985577000 | 2.062001000 | 1.700690000 |
|---|-------------|-------------|-------------|

|    |              |              |              |
|----|--------------|--------------|--------------|
| 6  | 0.972443000  | 0.766528000  | 2.502134000  |
| 6  | -2.415314000 | 1.160935000  | 1.296393000  |
| 6  | -1.731513000 | 0.355471000  | 2.393960000  |
| 6  | 1.296139000  | -2.307647000 | 1.520048000  |
| 6  | -0.086384000 | -1.692402000 | 1.713759000  |
| 1  | -1.877888000 | 2.085560000  | 1.070213000  |
| 1  | -1.724085000 | 0.998826000  | 3.286729000  |
| 1  | 1.300203000  | -3.387097000 | 1.686120000  |
| 1  | -0.627203000 | -2.231509000 | 2.509998000  |
| 1  | 1.831413000  | 2.712874000  | 1.941001000  |
| 1  | 1.951341000  | 0.280661000  | 2.399291000  |
| 6  | 0.764995000  | 3.063671000  | -1.056272000 |
| 1  | 0.977982000  | 2.698291000  | -2.068833000 |
| 6  | -3.558348000 | -1.164838000 | 0.042923000  |
| 1  | -3.065405000 | -1.693359000 | 0.868791000  |
| 6  | 3.456291000  | -1.087742000 | 0.003988000  |
| 1  | 3.226301000  | -0.241563000 | 0.662860000  |
| 23 | -0.154898000 | -0.529800000 | -0.558798000 |
| 16 | -2.497557000 | 0.321965000  | -0.327810000 |
| 16 | 1.134258000  | 1.548257000  | -0.056497000 |
| 16 | 1.859800000  | -2.013341000 | -0.204795000 |
| 1  | 0.064179000  | 2.638175000  | 1.834687000  |
| 1  | 0.893623000  | 1.035316000  | 3.566662000  |
| 1  | -0.743007000 | -2.020304000 | 0.858971000  |
| 1  | 2.037624000  | -1.870963000 | 2.194030000  |
| 1  | -2.386564000 | -0.486088000 | 2.661633000  |
| 1  | -3.434532000 | 1.456475000  | 1.563224000  |
| 6  | 4.502135000  | -1.987167000 | 0.627604000  |
| 1  | 5.430554000  | -1.427128000 | 0.777800000  |
| 1  | 4.198217000  | -2.375325000 | 1.603289000  |
| 1  | 4.730882000  | -2.840781000 | -0.016290000 |
| 6  | 3.847005000  | -0.580099000 | -1.368856000 |
| 1  | 4.036821000  | -1.404715000 | -2.062391000 |
| 1  | 3.074992000  | 0.060417000  | -1.804340000 |
| 1  | 4.767255000  | 0.006816000  | -1.299928000 |
| 6  | -4.944187000 | -0.722838000 | 0.464300000  |
| 1  | -5.564973000 | -1.602330000 | 0.660655000  |
| 1  | -4.941444000 | -0.124151000 | 1.378231000  |
| 1  | -5.435057000 | -0.142468000 | -0.322015000 |
| 6  | -3.569136000 | -2.041720000 | -1.194046000 |
| 1  | -3.979421000 | -1.513063000 | -2.059537000 |
| 1  | -2.573080000 | -2.400949000 | -1.464573000 |
| 1  | -4.201618000 | -2.915929000 | -1.016188000 |
| 6  | -0.679497000 | 3.504373000  | -0.966238000 |
| 1  | -1.374806000 | 2.710000000  | -1.248668000 |
| 1  | -0.934265000 | 3.854965000  | 0.039247000  |

|   |              |              |              |
|---|--------------|--------------|--------------|
| 1 | -0.852767000 | 4.347349000  | -1.642474000 |
| 6 | 1.743134000  | 4.163687000  | -0.691288000 |
| 1 | 2.782622000  | 3.834404000  | -0.751765000 |
| 1 | 1.619543000  | 5.009211000  | -1.374205000 |
| 1 | 1.562895000  | 4.542680000  | 0.319126000  |
| 5 | -0.249672000 | -0.162728000 | 2.113560000  |
| 7 | -0.634929000 | -1.209760000 | -3.488761000 |
| 7 | -0.382704000 | -0.897335000 | -2.339527000 |
| 1 | -0.279931000 | -0.508961000 | -4.177763000 |

**[3a''<sub>PC</sub>]-Triplet (TE = -3519.781959)**

|    |              |              |              |
|----|--------------|--------------|--------------|
| 6  | 0.377158000  | 1.460737000  | 1.626730000  |
| 6  | -0.329959000 | 2.160751000  | 2.620463000  |
| 1  | -1.156232000 | 1.666501000  | 3.127049000  |
| 6  | 0.007496000  | 3.456579000  | 2.985568000  |
| 1  | -0.562102000 | 3.960396000  | 3.763641000  |
| 6  | 1.076817000  | 4.105863000  | 2.373810000  |
| 1  | 1.347130000  | 5.118716000  | 2.660453000  |
| 6  | 1.784794000  | 3.448154000  | 1.376916000  |
| 1  | 2.594301000  | 3.971271000  | 0.871491000  |
| 6  | 1.449019000  | 2.146452000  | 0.985763000  |
| 6  | -1.285092000 | -0.431056000 | 1.836404000  |
| 6  | -1.342152000 | -1.192882000 | 3.012918000  |
| 1  | -0.419512000 | -1.458212000 | 3.522045000  |
| 6  | -2.547156000 | -1.633719000 | 3.547327000  |
| 1  | -2.544515000 | -2.230498000 | 4.456730000  |
| 6  | -3.748389000 | -1.313866000 | 2.926139000  |
| 1  | -4.694941000 | -1.656968000 | 3.335626000  |
| 6  | -3.724055000 | -0.558257000 | 1.761314000  |
| 1  | -4.662520000 | -0.327066000 | 1.265917000  |
| 6  | -2.514000000 | -0.126049000 | 1.209049000  |
| 6  | 1.120545000  | -0.933163000 | 1.643841000  |
| 6  | 1.879914000  | -0.774885000 | 2.808833000  |
| 1  | 1.770349000  | 0.139097000  | 3.391711000  |
| 6  | 2.751253000  | -1.766928000 | 3.241866000  |
| 1  | 3.327821000  | -1.620334000 | 4.152656000  |
| 6  | 2.880742000  | -2.950225000 | 2.520408000  |
| 1  | 3.556666000  | -3.730975000 | 2.859620000  |
| 6  | 2.143254000  | -3.126709000 | 1.355013000  |
| 1  | 2.251198000  | -4.049772000 | 0.792034000  |
| 6  | 1.276572000  | -2.125491000 | 0.906959000  |
| 6  | 0.036167000  | 0.044880000  | 1.253318000  |
| 23 | -0.015519000 | 0.213990000  | -1.032966000 |
| 6  | 2.170392000  | 2.800752000  | -1.740441000 |
| 1  | 2.730182000  | 3.627682000  | -1.284812000 |
| 6  | -3.828816000 | 0.000206000  | -1.431905000 |

|    |              |              |              |
|----|--------------|--------------|--------------|
| 1  | -3.875207000 | -1.048144000 | -1.097806000 |
| 6  | 1.355095000  | -3.002640000 | -1.968443000 |
| 1  | 0.766947000  | -2.782395000 | -2.872312000 |
| 6  | 1.543561000  | -4.513600000 | -1.897914000 |
| 1  | 2.084620000  | -4.853274000 | -2.787252000 |
| 1  | 2.136678000  | -4.826818000 | -1.035524000 |
| 1  | 0.601942000  | -5.064206000 | -1.870599000 |
| 6  | 2.692143000  | -2.280919000 | -2.102956000 |
| 1  | 3.330963000  | -2.454347000 | -1.230296000 |
| 1  | 3.233706000  | -2.645464000 | -2.980870000 |
| 1  | 2.566547000  | -1.199650000 | -2.218134000 |
| 6  | 2.855435000  | 2.379065000  | -3.034621000 |
| 1  | 3.917978000  | 2.160991000  | -2.901659000 |
| 1  | 2.383138000  | 1.489976000  | -3.467686000 |
| 1  | 2.783873000  | 3.176542000  | -3.780706000 |
| 6  | 0.748338000  | 3.275549000  | -2.005116000 |
| 1  | 0.207430000  | 3.527084000  | -1.086588000 |
| 1  | 0.744450000  | 4.171904000  | -2.633482000 |
| 1  | 0.173885000  | 2.520399000  | -2.556741000 |
| 6  | -5.200425000 | 0.633960000  | -1.216629000 |
| 1  | -5.955565000 | 0.065041000  | -1.768531000 |
| 1  | -5.519769000 | 0.661814000  | -0.174261000 |
| 1  | -5.241221000 | 1.657335000  | -1.597102000 |
| 6  | -3.472212000 | 0.007355000  | -2.915973000 |
| 1  | -3.367120000 | 1.024703000  | -3.306522000 |
| 1  | -2.534943000 | -0.517653000 | -3.111223000 |
| 1  | -4.260020000 | -0.480187000 | -3.498561000 |
| 15 | 0.339064000  | -2.174181000 | -0.648175000 |
| 15 | -2.405956000 | 0.664990000  | -0.420479000 |
| 15 | 2.156690000  | 1.387929000  | -0.519270000 |
| 6  | -2.602569000 | 2.508584000  | -0.173660000 |
| 1  | -1.614042000 | 2.787043000  | 0.224110000  |
| 6  | -2.790192000 | 3.235049000  | -1.501752000 |
| 1  | -3.792336000 | 3.090009000  | -1.912786000 |
| 1  | -2.658199000 | 4.312908000  | -1.364291000 |
| 1  | -2.074138000 | 2.917218000  | -2.265422000 |
| 6  | -3.639375000 | 2.909648000  | 0.865828000  |
| 1  | -3.575862000 | 3.985862000  | 1.057891000  |
| 1  | -4.660434000 | 2.702734000  | 0.535421000  |
| 1  | -3.486444000 | 2.398687000  | 1.820078000  |
| 6  | 3.976288000  | 1.005750000  | -0.342565000 |
| 1  | 4.227359000  | 0.609189000  | -1.337156000 |
| 6  | 4.276202000  | -0.065234000 | 0.690149000  |
| 1  | 4.083150000  | 0.296855000  | 1.703003000  |
| 1  | 3.691237000  | -0.975300000 | 0.545933000  |
| 1  | 5.335146000  | -0.338228000 | 0.640879000  |

|   |              |              |              |
|---|--------------|--------------|--------------|
| 6 | 4.816786000  | 2.248709000  | -0.075906000 |
| 1 | 5.875232000  | 1.972720000  | -0.035114000 |
| 1 | 4.719354000  | 3.020786000  | -0.842062000 |
| 1 | 4.570939000  | 2.695739000  | 0.892446000  |
| 6 | -1.205457000 | -3.177349000 | -0.377184000 |
| 1 | -1.844099000 | -2.477322000 | 0.179721000  |
| 6 | -1.026603000 | -4.415167000 | 0.491214000  |
| 1 | -1.999447000 | -4.881888000 | 0.677561000  |
| 1 | -0.390946000 | -5.172945000 | 0.026354000  |
| 1 | -0.592880000 | -4.169568000 | 1.464137000  |
| 6 | -1.882542000 | -3.464728000 | -1.712975000 |
| 1 | -2.885165000 | -3.873759000 | -1.553565000 |
| 1 | -1.992768000 | -2.560531000 | -2.322691000 |
| 1 | -1.332557000 | -4.196423000 | -2.311596000 |
| 7 | 0.228718000  | -0.321208000 | -4.009768000 |
| 7 | 0.039508000  | -0.049125000 | -2.834252000 |
| 1 | -0.660729000 | -0.498815000 | -4.526687000 |

**[3b''<sub>psi</sub>]-Triplet (TE = -3771.188296)**

|   |              |              |              |
|---|--------------|--------------|--------------|
| 6 | 0.733165000  | -2.358887000 | 1.102098000  |
| 6 | 0.423900000  | -3.479064000 | 1.884476000  |
| 1 | -0.445819000 | -3.450860000 | 2.541754000  |
| 6 | 1.189855000  | -4.637863000 | 1.825005000  |
| 1 | 0.928262000  | -5.498278000 | 2.436907000  |
| 6 | 2.290855000  | -4.695283000 | 0.975999000  |
| 1 | 2.893953000  | -5.598377000 | 0.920906000  |
| 6 | 2.616760000  | -3.598123000 | 0.186608000  |
| 1 | 3.475769000  | -3.668008000 | -0.474971000 |
| 6 | 1.843472000  | -2.433267000 | 0.233321000  |
| 6 | 0.505443000  | 0.397299000  | 2.398297000  |
| 6 | 0.866444000  | -0.041214000 | 3.678782000  |
| 1 | 0.718895000  | -1.086830000 | 3.952010000  |
| 6 | 1.446798000  | 0.820006000  | 4.602200000  |
| 1 | 1.729148000  | 0.455998000  | 5.587570000  |
| 6 | 1.676527000  | 2.149183000  | 4.257596000  |
| 1 | 2.133848000  | 2.829144000  | 4.972367000  |
| 6 | 1.331645000  | 2.607106000  | 2.991685000  |
| 1 | 1.535024000  | 3.643453000  | 2.736436000  |
| 6 | 0.752149000  | 1.740396000  | 2.058173000  |
| 6 | -2.061328000 | -1.016507000 | 1.626754000  |
| 6 | -2.473268000 | -1.284654000 | 2.937097000  |
| 1 | -1.729113000 | -1.472629000 | 3.710884000  |
| 6 | -3.818481000 | -1.266951000 | 3.290091000  |
| 1 | -4.116635000 | -1.465905000 | 4.316980000  |
| 6 | -4.780151000 | -0.959249000 | 2.333096000  |
| 1 | -5.830790000 | -0.912284000 | 2.609188000  |

|    |              |              |              |
|----|--------------|--------------|--------------|
| 6  | -4.400513000 | -0.698838000 | 1.020806000  |
| 1  | -5.167129000 | -0.436945000 | 0.297562000  |
| 6  | -3.050537000 | -0.743678000 | 0.659917000  |
| 23 | -0.013155000 | 0.328325000  | -1.198372000 |
| 6  | 3.841071000  | -0.351388000 | -0.044370000 |
| 1  | 4.519416000  | -1.202177000 | -0.197012000 |
| 6  | -1.199556000 | 3.340384000  | 0.604486000  |
| 1  | -0.857229000 | 4.201224000  | 1.194073000  |
| 6  | -2.189555000 | -2.048189000 | -1.887687000 |
| 1  | -2.950822000 | -2.095655000 | -2.674695000 |
| 6  | -2.344259000 | -3.252309000 | -0.975105000 |
| 1  | -2.205930000 | -4.176823000 | -1.545302000 |
| 1  | -1.599686000 | -3.253135000 | -0.172066000 |
| 1  | -3.330065000 | -3.293930000 | -0.505054000 |
| 6  | -0.816409000 | -2.013144000 | -2.546326000 |
| 1  | -0.027796000 | -1.927696000 | -1.774893000 |
| 1  | -0.574141000 | -2.940587000 | -3.076286000 |
| 1  | -0.721562000 | -1.200181000 | -3.275924000 |
| 6  | 4.392815000  | 0.861659000  | -0.778593000 |
| 1  | 4.421021000  | 0.745126000  | -1.865233000 |
| 1  | 3.798039000  | 1.752166000  | -0.561986000 |
| 1  | 5.415267000  | 1.071821000  | -0.448970000 |
| 6  | 3.750524000  | -0.090759000 | 1.450104000  |
| 1  | 3.312703000  | -0.926597000 | 2.002403000  |
| 1  | 4.754268000  | 0.079301000  | 1.852872000  |
| 1  | 3.160263000  | 0.801382000  | 1.673055000  |
| 6  | -1.725191000 | 3.819724000  | -0.741312000 |
| 1  | -2.566709000 | 4.506685000  | -0.606513000 |
| 1  | -0.973128000 | 4.339716000  | -1.342383000 |
| 1  | -2.084377000 | 2.974348000  | -1.338323000 |
| 6  | -2.282376000 | 2.623256000  | 1.393333000  |
| 1  | -2.698958000 | 1.784703000  | 0.830579000  |
| 1  | -1.927838000 | 2.230875000  | 2.350907000  |
| 1  | -3.109598000 | 3.308917000  | 1.602855000  |
| 14 | -0.260853000 | -0.747794000 | 1.095961000  |
| 15 | 0.319933000  | 2.285073000  | 0.360041000  |
| 15 | -2.425797000 | -0.388598000 | -1.024202000 |
| 15 | 2.242051000  | -0.958455000 | -0.801309000 |
| 6  | 2.811679000  | -1.697144000 | -2.450677000 |
| 1  | 2.201141000  | -2.608082000 | -2.533233000 |
| 6  | 4.280502000  | -2.101442000 | -2.546582000 |
| 1  | 4.447657000  | -2.628825000 | -3.490986000 |
| 1  | 4.947006000  | -1.234840000 | -2.550548000 |
| 1  | 4.618260000  | -2.766205000 | -1.750366000 |
| 6  | 2.460527000  | -0.779518000 | -3.618010000 |
| 1  | 1.386724000  | -0.610209000 | -3.713880000 |

|   |              |              |              |
|---|--------------|--------------|--------------|
| 1 | 2.933878000  | 0.204592000  | -3.523194000 |
| 1 | 2.807984000  | -1.214168000 | -4.560648000 |
| 6 | -3.845298000 | 0.385242000  | -1.956162000 |
| 1 | -4.230806000 | 1.148268000  | -1.263307000 |
| 6 | -3.339147000 | 1.073817000  | -3.217345000 |
| 1 | -2.857698000 | 0.359744000  | -3.896380000 |
| 1 | -4.173929000 | 1.518348000  | -3.768267000 |
| 1 | -2.610871000 | 1.860414000  | -3.017954000 |
| 6 | -4.970239000 | -0.590028000 | -2.312696000 |
| 1 | -4.736024000 | -1.140190000 | -3.228611000 |
| 1 | -5.191421000 | -1.331816000 | -1.542453000 |
| 1 | -5.894614000 | -0.039483000 | -2.512447000 |
| 6 | 1.671418000  | 3.531415000  | -0.071770000 |
| 1 | 2.535777000  | 3.140658000  | 0.486188000  |
| 6 | 1.418797000  | 4.966174000  | 0.384284000  |
| 1 | 2.311184000  | 5.570905000  | 0.194354000  |
| 1 | 0.600569000  | 5.430642000  | -0.173616000 |
| 1 | 1.185136000  | 5.067200000  | 1.445414000  |
| 6 | 2.020760000  | 3.532926000  | -1.555929000 |
| 1 | 2.220412000  | 2.531700000  | -1.945766000 |
| 1 | 1.213580000  | 3.967719000  | -2.154565000 |
| 1 | 2.911757000  | 4.145248000  | -1.729621000 |
| 7 | -0.114181000 | 2.028342000  | -3.721471000 |
| 7 | 0.025811000  | 1.376537000  | -2.701705000 |
| 1 | 0.802879000  | 2.347492000  | -4.109587000 |

**[3c''<sub>PB</sub>]-Quartet (TE = -3506.526313)**

|   |              |              |             |
|---|--------------|--------------|-------------|
| 6 | -1.641465000 | 1.080864000  | 1.694473000 |
| 6 | -1.814372000 | 2.039095000  | 2.708100000 |
| 1 | -0.933917000 | 2.457902000  | 3.193366000 |
| 6 | -3.072284000 | 2.455871000  | 3.129290000 |
| 1 | -3.161439000 | 3.193564000  | 3.923671000 |
| 6 | -4.213856000 | 1.927396000  | 2.537140000 |
| 1 | -5.202328000 | 2.240682000  | 2.864041000 |
| 6 | -4.079823000 | 1.010139000  | 1.500559000 |
| 1 | -4.975693000 | 0.628670000  | 1.014141000 |
| 6 | -2.818079000 | 0.593629000  | 1.069035000 |
| 6 | 0.047307000  | -1.034047000 | 1.789202000 |
| 6 | -0.730893000 | -1.439575000 | 2.902489000 |
| 1 | -1.543629000 | -0.798702000 | 3.234733000 |
| 6 | -0.460995000 | -2.586057000 | 3.632108000 |
| 1 | -1.062579000 | -2.823261000 | 4.506438000 |
| 6 | 0.577149000  | -3.426859000 | 3.244637000 |
| 1 | 0.801582000  | -4.327458000 | 3.811004000 |
| 6 | 1.320946000  | -3.108150000 | 2.118764000 |



|    |              |              |              |
|----|--------------|--------------|--------------|
| 1  | 2.115371000  | -3.780262000 | 1.802832000  |
| 6  | 1.085712000  | -1.933849000 | 1.392026000  |
| 6  | 1.049812000  | 1.498020000  | 1.655577000  |
| 6  | 1.596895000  | 1.685823000  | 2.934197000  |
| 1  | 1.206480000  | 1.107434000  | 3.772549000  |
| 6  | 2.637930000  | 2.579981000  | 3.153756000  |
| 1  | 3.049147000  | 2.700505000  | 4.153650000  |
| 6  | 3.161948000  | 3.315356000  | 2.093315000  |
| 1  | 3.978281000  | 4.013841000  | 2.260048000  |
| 6  | 2.644227000  | 3.143499000  | 0.815933000  |
| 1  | 3.068248000  | 3.708689000  | -0.010686000 |
| 6  | 1.597495000  | 2.241253000  | 0.594993000  |
| 23 | -0.120144000 | -0.470008000 | -0.828072000 |
| 6  | -3.456632000 | -2.040828000 | -0.251610000 |
| 1  | -4.523231000 | -1.825465000 | -0.099774000 |
| 6  | 3.779936000  | -1.386210000 | 0.276036000  |
| 1  | 4.074600000  | -2.354585000 | 0.705270000  |
| 6  | -0.091416000 | 3.343741000  | -1.565248000 |
| 1  | -0.140932000 | 3.266715000  | -2.662722000 |
| 6  | 0.494641000  | 4.693846000  | -1.169264000 |
| 1  | -0.162651000 | 5.493031000  | -1.527435000 |
| 1  | 0.549054000  | 4.790411000  | -0.080850000 |
| 1  | 1.487074000  | 4.891684000  | -1.570676000 |
| 6  | -1.499351000 | 3.231814000  | -1.001112000 |
| 1  | -1.505331000 | 3.364719000  | 0.085429000  |
| 1  | -2.150546000 | 4.001443000  | -1.427904000 |
| 1  | -1.943232000 | 2.260700000  | -1.209851000 |
| 6  | -3.281707000 | -2.860014000 | -1.526662000 |
| 1  | -3.615058000 | -2.343597000 | -2.429977000 |
| 1  | -2.232746000 | -3.127863000 | -1.683115000 |
| 1  | -3.850273000 | -3.792647000 | -1.458563000 |
| 6  | -2.941818000 | -2.808405000 | 0.953092000  |
| 1  | -3.086646000 | -2.263086000 | 1.888727000  |
| 1  | -3.470310000 | -3.763126000 | 1.041505000  |
| 1  | -1.873681000 | -3.038272000 | 0.861993000  |
| 6  | 4.616143000  | -1.126300000 | -0.972051000 |
| 1  | 5.682032000  | -1.202183000 | -0.736555000 |
| 1  | 4.414170000  | -1.824151000 | -1.789529000 |
| 1  | 4.447206000  | -0.118026000 | -1.359784000 |
| 6  | 3.991605000  | -0.317328000 | 1.332382000  |
| 1  | 3.737642000  | 0.679701000  | 0.963113000  |
| 1  | 3.399569000  | -0.498013000 | 2.233101000  |
| 1  | 5.045172000  | -0.293595000 | 1.629083000  |
| 5  | -0.176249000 | 0.519065000  | 1.447444000  |
| 7  | -0.409970000 | -1.831418000 | -3.537740000 |
| 7  | -0.295673000 | -1.237776000 | -2.479129000 |

|    |              |              |              |
|----|--------------|--------------|--------------|
| 1  | -0.366082000 | -1.185278000 | -4.359566000 |
| 15 | 0.915478000  | 1.851276000  | -1.049663000 |
| 15 | -2.627450000 | -0.386407000 | -0.461998000 |
| 15 | 1.989515000  | -1.646306000 | -0.171599000 |
| 6  | 2.399007000  | 1.787770000  | -2.203934000 |
| 1  | 3.190245000  | 1.404563000  | -1.544225000 |
| 6  | 2.871997000  | 3.108803000  | -2.798117000 |
| 1  | 3.726999000  | 2.922874000  | -3.456002000 |
| 1  | 2.101554000  | 3.585538000  | -3.411867000 |
| 1  | 3.201888000  | 3.832407000  | -2.052033000 |
| 6  | 2.170441000  | 0.775070000  | -3.321096000 |
| 1  | 2.016834000  | -0.236438000 | -2.939376000 |
| 1  | 1.296663000  | 1.034522000  | -3.931440000 |
| 1  | 3.034607000  | 0.750093000  | -3.992840000 |
| 6  | 2.015376000  | -3.298090000 | -1.083205000 |
| 1  | 2.101717000  | -2.968856000 | -2.129950000 |
| 6  | 0.692374000  | -4.046893000 | -0.947610000 |
| 1  | -0.180253000 | -3.399166000 | -1.059347000 |
| 1  | 0.621094000  | -4.819246000 | -1.719036000 |
| 1  | 0.609468000  | -4.545041000 | 0.022489000  |
| 6  | 3.178994000  | -4.240174000 | -0.791738000 |
| 1  | 3.093389000  | -5.123239000 | -1.433087000 |
| 1  | 4.160980000  | -3.805419000 | -0.984619000 |
| 1  | 3.175870000  | -4.606920000 | 0.238986000  |
| 6  | -3.727006000 | 0.499938000  | -1.716273000 |
| 1  | -3.763533000 | 1.524240000  | -1.326549000 |
| 6  | -5.166445000 | 0.005152000  | -1.804322000 |
| 1  | -5.731149000 | 0.659882000  | -2.475681000 |
| 1  | -5.243450000 | -1.005168000 | -2.213516000 |
| 1  | -5.687892000 | 0.013087000  | -0.844586000 |
| 6  | -3.077301000 | 0.534056000  | -3.096017000 |
| 1  | -2.057542000 | 0.933739000  | -3.067816000 |
| 1  | -3.022605000 | -0.462494000 | -3.545614000 |
| 1  | -3.662901000 | 1.161147000  | -3.775947000 |

**[3d''<sub>sc</sub>]-Triplet (TE = -3334.916108)**

|   |              |             |              |
|---|--------------|-------------|--------------|
| 6 | -0.338962000 | 1.952622000 | 0.363712000  |
| 6 | 0.249051000  | 3.087508000 | 0.941869000  |
| 1 | 1.126006000  | 2.967025000 | 1.572790000  |
| 6 | -0.275157000 | 4.362891000 | 0.756971000  |
| 1 | 0.207632000  | 5.213031000 | 1.233247000  |
| 6 | -1.412427000 | 4.555409000 | -0.019569000 |
| 1 | -1.828033000 | 5.549428000 | -0.160011000 |
| 6 | -1.985973000 | 3.463242000 | -0.658907000 |
| 1 | -2.831637000 | 3.602046000 | -1.328954000 |
| 6 | -1.450779000 | 2.189867000 | -0.476760000 |

|    |              |              |              |
|----|--------------|--------------|--------------|
| 6  | -0.875951000 | -0.136558000 | 1.558067000  |
| 6  | -1.482169000 | 0.564940000  | 2.612566000  |
| 1  | -1.287730000 | 1.631542000  | 2.712340000  |
| 6  | -2.321249000 | -0.056084000 | 3.528051000  |
| 1  | -2.763035000 | 0.525245000  | 4.333907000  |
| 6  | -2.604106000 | -1.414410000 | 3.413322000  |
| 1  | -3.265020000 | -1.905453000 | 4.122496000  |
| 6  | -2.065742000 | -2.130535000 | 2.353654000  |
| 1  | -2.322113000 | -3.178003000 | 2.210127000  |
| 6  | -1.216705000 | -1.494250000 | 1.445800000  |
| 6  | 1.513979000  | 0.488289000  | 1.243944000  |
| 6  | 1.727458000  | 0.750766000  | 2.606456000  |
| 1  | 0.870527000  | 0.958135000  | 3.242024000  |
| 6  | 2.994360000  | 0.756807000  | 3.174991000  |
| 1  | 3.105134000  | 0.964424000  | 4.236666000  |
| 6  | 4.116264000  | 0.494365000  | 2.395114000  |
| 1  | 5.110717000  | 0.491399000  | 2.832981000  |
| 6  | 3.945771000  | 0.197301000  | 1.051932000  |
| 1  | 4.800571000  | -0.068215000 | 0.434695000  |
| 6  | 2.664888000  | 0.196350000  | 0.492805000  |
| 16 | 2.515708000  | -0.466038000 | -1.166234000 |
| 16 | -1.989850000 | 0.863837000  | -1.546159000 |
| 16 | -0.709065000 | -2.397332000 | -0.005824000 |
| 23 | 0.060579000  | -0.508959000 | -1.355234000 |
| 6  | -3.745535000 | 0.352243000  | -1.105834000 |
| 1  | -4.341374000 | 1.072692000  | -1.677843000 |
| 6  | 0.584190000  | -3.618054000 | 0.584892000  |
| 1  | -0.026969000 | -4.367070000 | 1.103012000  |
| 6  | 2.765005000  | 0.977468000  | -2.345394000 |
| 1  | 3.077034000  | 0.448732000  | -3.253164000 |
| 6  | 3.862588000  | 1.896571000  | -1.867088000 |
| 1  | 4.035859000  | 2.677465000  | -2.613687000 |
| 1  | 3.590944000  | 2.393291000  | -0.930711000 |
| 1  | 4.807207000  | 1.370958000  | -1.712290000 |
| 6  | 1.453513000  | 1.697972000  | -2.586799000 |
| 1  | 1.090862000  | 2.202260000  | -1.687256000 |
| 1  | 1.566330000  | 2.468945000  | -3.356281000 |
| 1  | 0.669266000  | 1.032642000  | -2.990262000 |
| 6  | -3.933863000 | -1.038668000 | -1.674507000 |
| 1  | -3.670111000 | -1.101023000 | -2.733482000 |
| 1  | -3.333947000 | -1.776070000 | -1.131679000 |
| 1  | -4.983482000 | -1.331938000 | -1.578443000 |
| 6  | -4.065055000 | 0.463373000  | 0.363017000  |
| 1  | -3.788962000 | 1.434058000  | 0.783009000  |
| 1  | -5.145813000 | 0.346073000  | 0.495925000  |
| 1  | -3.574394000 | -0.317093000 | 0.946965000  |

|   |              |              |              |
|---|--------------|--------------|--------------|
| 6 | 1.201616000  | -4.225588000 | -0.658183000 |
| 1 | 1.867635000  | -5.046053000 | -0.376803000 |
| 1 | 0.451461000  | -4.629657000 | -1.343509000 |
| 1 | 1.802913000  | -3.489566000 | -1.202480000 |
| 6 | 1.592954000  | -3.021679000 | 1.535172000  |
| 1 | 2.266964000  | -2.327282000 | 1.028906000  |
| 1 | 1.125001000  | -2.493820000 | 2.370220000  |
| 1 | 2.207666000  | -3.823477000 | 1.957125000  |
| 6 | 0.123674000  | 0.534275000  | 0.621494000  |
| 7 | -0.610316000 | -2.185400000 | -3.809743000 |
| 7 | -0.206507000 | -1.510676000 | -2.889983000 |
| 1 | 0.151987000  | -2.679451000 | -4.324658000 |

**[3e''<sub>ssi</sub>]-Triplet (TE = -3586.318558)**

|    |              |              |              |
|----|--------------|--------------|--------------|
| 6  | 0.823448000  | 0.771567000  | 2.073361000  |
| 6  | 1.712314000  | 1.502426000  | 2.869627000  |
| 1  | 2.131385000  | 2.431957000  | 2.483840000  |
| 6  | 2.089725000  | 1.056466000  | 4.131618000  |
| 1  | 2.785625000  | 1.636995000  | 4.731950000  |
| 6  | 1.580304000  | -0.142069000 | 4.619075000  |
| 1  | 1.874955000  | -0.504218000 | 5.600847000  |
| 6  | 0.692747000  | -0.894711000 | 3.855529000  |
| 1  | 0.306305000  | -1.826538000 | 4.257210000  |
| 6  | 0.332678000  | -0.436579000 | 2.591472000  |
| 6  | 1.961383000  | 1.767469000  | -0.518806000 |
| 6  | 2.402424000  | 3.081306000  | -0.715841000 |
| 1  | 1.747619000  | 3.910046000  | -0.448462000 |
| 6  | 3.655477000  | 3.349105000  | -1.256629000 |
| 1  | 3.974398000  | 4.376667000  | -1.412603000 |
| 6  | 4.506166000  | 2.298871000  | -1.587100000 |
| 1  | 5.493572000  | 2.500281000  | -1.994659000 |
| 6  | 4.102000000  | 0.981244000  | -1.395884000 |
| 1  | 4.782307000  | 0.170451000  | -1.643079000 |
| 6  | 2.827571000  | 0.728789000  | -0.896211000 |
| 6  | -1.059942000 | 2.426811000  | 0.149727000  |
| 6  | -1.115797000 | 3.696277000  | 0.741221000  |
| 1  | -0.300460000 | 4.021173000  | 1.387275000  |
| 6  | -2.196690000 | 4.545037000  | 0.534434000  |
| 1  | -2.222209000 | 5.522060000  | 1.010416000  |
| 6  | -3.243482000 | 4.145039000  | -0.291479000 |
| 1  | -4.084629000 | 4.809919000  | -0.470720000 |
| 6  | -3.216110000 | 2.896673000  | -0.901368000 |
| 1  | -4.024343000 | 2.598963000  | -1.563948000 |
| 6  | -2.141968000 | 2.041761000  | -0.656346000 |
| 16 | -2.095501000 | 0.429286000  | -1.467793000 |
| 16 | -0.884219000 | -1.288937000 | 1.564354000  |

|    |              |              |              |
|----|--------------|--------------|--------------|
| 16 | 2.281942000  | -0.985210000 | -0.631876000 |
| 23 | -0.225760000 | -1.000359000 | -0.794387000 |
| 6  | -0.845078000 | -3.055399000 | 2.139266000  |
| 1  | -0.921777000 | -2.978966000 | 3.228879000  |
| 6  | 2.811602000  | -1.802332000 | -2.227559000 |
| 1  | 3.877987000  | -1.568125000 | -2.305003000 |
| 6  | -3.722079000 | -0.428145000 | -1.032512000 |
| 1  | -3.384545000 | -1.471553000 | -1.035983000 |
| 6  | -4.743911000 | -0.220301000 | -2.130387000 |
| 1  | -5.617557000 | -0.850679000 | -1.935479000 |
| 1  | -5.099037000 | 0.812817000  | -2.173644000 |
| 1  | -4.356071000 | -0.487294000 | -3.115259000 |
| 6  | -4.220244000 | -0.051455000 | 0.343680000  |
| 1  | -4.566568000 | 0.984088000  | 0.387083000  |
| 1  | -5.075632000 | -0.686879000 | 0.595093000  |
| 1  | -3.461505000 | -0.189640000 | 1.116344000  |
| 6  | -2.099748000 | -3.724864000 | 1.612215000  |
| 1  | -3.006393000 | -3.218490000 | 1.952452000  |
| 1  | -2.122413000 | -3.760840000 | 0.520864000  |
| 1  | -2.141735000 | -4.757033000 | 1.971394000  |
| 6  | 0.442145000  | -3.744306000 | 1.742487000  |
| 1  | 1.325617000  | -3.216537000 | 2.112410000  |
| 1  | 0.466908000  | -4.759855000 | 2.150616000  |
| 1  | 0.528156000  | -3.823112000 | 0.653309000  |
| 6  | 2.634856000  | -3.296436000 | -2.059399000 |
| 1  | 2.971203000  | -3.811770000 | -2.963478000 |
| 1  | 3.208787000  | -3.689357000 | -1.217027000 |
| 1  | 1.583184000  | -3.556201000 | -1.904049000 |
| 6  | 2.059475000  | -1.228902000 | -3.409977000 |
| 1  | 0.999079000  | -1.514816000 | -3.385336000 |
| 1  | 2.128909000  | -0.138980000 | -3.459633000 |
| 1  | 2.462500000  | -1.626146000 | -4.347013000 |
| 14 | 0.361188000  | 1.205748000  | 0.294261000  |
| 7  | -1.478326000 | -3.520420000 | -1.954546000 |
| 7  | -0.844425000 | -2.612346000 | -1.448433000 |
| 1  | -0.879652000 | -4.343501000 | -2.192761000 |

**[3f'<sub>SB</sub>]-Quartet (TE = -3321.670568)**

|   |              |             |              |
|---|--------------|-------------|--------------|
| 6 | -0.371067000 | 2.065468000 | 0.434447000  |
| 6 | 0.157203000  | 3.204528000 | 1.068455000  |
| 1 | 0.989717000  | 3.082887000 | 1.760146000  |
| 6 | -0.369440000 | 4.475227000 | 0.864621000  |
| 1 | 0.055637000  | 5.327289000 | 1.390012000  |
| 6 | -1.434076000 | 4.660966000 | -0.012604000 |
| 1 | -1.844964000 | 5.652996000 | -0.180990000 |
| 6 | -1.944282000 | 3.571671000 | -0.708427000 |

|    |              |              |              |
|----|--------------|--------------|--------------|
| 1  | -2.733986000 | 3.710050000  | -1.443895000 |
| 6  | -1.419128000 | 2.301662000  | -0.476606000 |
| 6  | -0.945931000 | -0.224605000 | 1.693251000  |
| 6  | -1.524086000 | 0.376785000  | 2.825510000  |
| 1  | -1.287311000 | 1.417883000  | 3.046693000  |
| 6  | -2.393727000 | -0.308002000 | 3.665482000  |
| 1  | -2.813441000 | 0.192847000  | 4.534817000  |
| 6  | -2.743321000 | -1.626742000 | 3.386347000  |
| 1  | -3.433941000 | -2.163912000 | 4.031101000  |
| 6  | -2.229009000 | -2.243607000 | 2.253790000  |
| 1  | -2.531521000 | -3.255869000 | 1.992869000  |
| 6  | -1.337992000 | -1.545145000 | 1.436801000  |
| 6  | 1.640197000  | 0.468467000  | 1.339422000  |
| 6  | 1.920842000  | 0.766835000  | 2.685654000  |
| 1  | 1.095910000  | 1.027770000  | 3.347945000  |
| 6  | 3.208564000  | 0.735358000  | 3.205849000  |
| 1  | 3.374035000  | 0.975946000  | 4.253464000  |
| 6  | 4.281664000  | 0.378582000  | 2.394670000  |
| 1  | 5.290974000  | 0.337175000  | 2.795418000  |
| 6  | 4.046116000  | 0.040008000  | 1.070525000  |
| 1  | 4.863754000  | -0.292130000 | 0.435179000  |
| 6  | 2.746539000  | 0.101229000  | 0.559067000  |
| 16 | 2.518881000  | -0.551929000 | -1.103210000 |
| 16 | -1.927732000 | 0.959634000  | -1.544998000 |
| 16 | -0.815958000 | -2.334111000 | -0.081634000 |
| 23 | 0.074182000  | -0.497236000 | -1.437282000 |
| 6  | -3.708161000 | 0.515018000  | -1.135080000 |
| 1  | -4.263725000 | 1.284150000  | -1.684444000 |
| 6  | 0.413224000  | -3.636846000 | 0.467352000  |
| 1  | -0.238826000 | -4.375795000 | 0.948832000  |
| 6  | 2.874563000  | 0.869452000  | -2.274628000 |
| 1  | 3.004159000  | 0.326281000  | -3.218083000 |
| 6  | 4.147541000  | 1.591749000  | -1.904131000 |
| 1  | 4.361721000  | 2.360074000  | -2.653136000 |
| 1  | 4.058681000  | 2.094571000  | -0.936884000 |
| 1  | 5.007858000  | 0.920273000  | -1.863347000 |
| 6  | 1.675194000  | 1.791093000  | -2.363718000 |
| 1  | 1.454093000  | 2.274522000  | -1.408702000 |
| 1  | 1.845894000  | 2.585051000  | -3.098599000 |
| 1  | 0.766518000  | 1.279322000  | -2.734773000 |
| 6  | -3.961999000 | -0.845009000 | -1.749639000 |
| 1  | -3.712101000 | -0.880927000 | -2.812862000 |
| 1  | -3.390015000 | -1.626847000 | -1.240115000 |
| 1  | -5.022292000 | -1.095606000 | -1.651281000 |
| 6  | -4.028127000 | 0.594336000  | 0.336696000  |
| 1  | -3.717199000 | 1.541201000  | 0.785460000  |

|   |              |              |              |
|---|--------------|--------------|--------------|
| 1 | -5.113128000 | 0.514799000  | 0.462211000  |
| 1 | -3.569729000 | -0.220177000 | 0.899979000  |
| 6 | 1.023278000  | -4.226635000 | -0.787531000 |
| 1 | 1.639600000  | -5.091124000 | -0.525265000 |
| 1 | 0.268081000  | -4.563762000 | -1.502554000 |
| 1 | 1.675982000  | -3.505519000 | -1.290980000 |
| 6 | 1.432040000  | -3.121276000 | 1.454442000  |
| 1 | 2.132961000  | -2.424667000 | 0.989054000  |
| 1 | 0.973486000  | -2.619477000 | 2.310301000  |
| 1 | 2.017162000  | -3.962204000 | 1.840684000  |
| 5 | 0.123566000  | 0.615428000  | 0.861652000  |
| 7 | -0.738028000 | -2.009185000 | -3.941644000 |
| 7 | -0.236392000 | -1.379633000 | -3.038891000 |
| 1 | -0.049873000 | -2.306969000 | -4.667917000 |

{[HIPTN<sub>3</sub>N]-V-N=NH}<sup>+</sup> (TE = -2203.381994)

|    |              |              |              |
|----|--------------|--------------|--------------|
| 23 | -0.007754000 | -0.750704000 | -0.339660000 |
| 6  | 1.399555000  | -3.079468000 | 1.108205000  |
| 6  | 1.925046000  | -2.967528000 | -0.306946000 |
| 6  | -0.800205000 | -0.503942000 | 2.371273000  |
| 6  | -0.304260000 | -1.936217000 | 2.481107000  |
| 6  | -0.961536000 | -3.431161000 | 0.621416000  |
| 6  | -2.191141000 | -2.648780000 | 0.253250000  |
| 1  | -2.760637000 | -2.368687000 | 1.151654000  |
| 1  | -2.874102000 | -3.244556000 | -0.365240000 |
| 1  | -0.545224000 | -3.909071000 | -0.271157000 |
| 1  | -1.172875000 | -4.222396000 | 1.352798000  |
| 1  | -0.677116000 | -0.001653000 | 3.339265000  |
| 1  | -1.878371000 | -0.475800000 | 2.148853000  |
| 1  | 0.599295000  | -1.958758000 | 3.093619000  |
| 1  | -1.038311000 | -2.582182000 | 2.976606000  |
| 1  | 2.032390000  | -2.492164000 | 1.778775000  |
| 1  | 1.390800000  | -4.114207000 | 1.477737000  |
| 1  | 1.438610000  | -3.688164000 | -0.974940000 |
| 1  | 2.997132000  | -3.184155000 | -0.349438000 |
| 7  | -1.755779000 | -1.461567000 | -0.475290000 |
| 7  | 0.046533000  | -2.481081000 | 1.138091000  |
| 7  | -0.035605000 | 0.184029000  | 1.334616000  |
| 7  | 1.636253000  | -1.615642000 | -0.782928000 |
| 6  | -2.770204000 | -0.542530000 | -0.826792000 |
| 6  | -2.789655000 | -0.009862000 | -2.124267000 |
| 6  | -3.758537000 | -0.135875000 | 0.088326000  |
| 6  | -3.744548000 | 0.925778000  | -2.488364000 |
| 1  | -2.041278000 | -0.345876000 | -2.836963000 |
| 6  | -4.706964000 | 0.804964000  | -0.281423000 |
| 1  | -3.776343000 | -0.545121000 | 1.094910000  |

|   |              |              |              |
|---|--------------|--------------|--------------|
| 6 | -4.702661000 | 1.342812000  | -1.567495000 |
| 1 | -3.746086000 | 1.326525000  | -3.498570000 |
| 1 | -5.455389000 | 1.123595000  | 0.439652000  |
| 1 | -5.450635000 | 2.078029000  | -1.852080000 |
| 6 | 0.104647000  | 1.572718000  | 1.459931000  |
| 6 | -0.872063000 | 2.380119000  | 2.062317000  |
| 6 | 1.248683000  | 2.188558000  | 0.927503000  |
| 6 | -0.717075000 | 3.761770000  | 2.095834000  |
| 1 | -1.770421000 | 1.928042000  | 2.476390000  |
| 6 | 1.391133000  | 3.568949000  | 0.955815000  |
| 1 | 2.025961000  | 1.561040000  | 0.494641000  |
| 6 | 0.406237000  | 4.365800000  | 1.539149000  |
| 1 | -1.490437000 | 4.372972000  | 2.555143000  |
| 1 | 2.287736000  | 4.023052000  | 0.538445000  |
| 1 | 0.520755000  | 5.445833000  | 1.570207000  |
| 6 | 2.713699000  | -0.727253000 | -0.917868000 |
| 6 | 3.768791000  | -0.672043000 | 0.014255000  |
| 6 | 2.718479000  | 0.167556000  | -2.000084000 |
| 6 | 4.756519000  | 0.289176000  | -0.111456000 |
| 1 | 3.788368000  | -1.359981000 | 0.856115000  |
| 6 | 3.708791000  | 1.132753000  | -2.115132000 |
| 1 | 1.946552000  | 0.068528000  | -2.757523000 |
| 6 | 4.725129000  | 1.204009000  | -1.167516000 |
| 1 | 5.553803000  | 0.338792000  | 0.625662000  |
| 1 | 3.699260000  | 1.816228000  | -2.960437000 |
| 1 | 5.504336000  | 1.956241000  | -1.256724000 |
| 7 | -0.164076000 | 1.848223000  | -1.887161000 |
| 7 | -0.061133000 | 0.779651000  | -1.355474000 |
| 1 | 0.120072000  | 2.642972000  | -1.264415000 |

Cartesian coordinates of  $[4a'_{PC}]-[4f'_{SB}]$ ,  $[4a''_{PC}]-[4f''_{SB}]$  and  $[[HIPTN_3N]-V-N=NH]$  along with their total energies (in hartree) including zero point vibrational correction at M06-L-D3(heptane)/6-311+G\* level of theory.

$[4a'_{PC}]$  (TE = -3062.653876)

|   |              |              |             |
|---|--------------|--------------|-------------|
| 6 | -0.588905000 | 2.266166000  | 1.951018000 |
| 6 | 0.196758000  | 1.175238000  | 2.677953000 |
| 6 | -2.410077000 | -0.691080000 | 2.044770000 |
| 6 | -1.046044000 | -1.018543000 | 2.643048000 |
| 6 | 2.679760000  | -0.586078000 | 1.809572000 |
| 6 | 1.405463000  | -0.979913000 | 2.546432000 |
| 1 | -2.694416000 | 0.350010000  | 2.238012000 |
| 1 | -1.102760000 | -0.899928000 | 3.744916000 |
| 1 | 3.567985000  | -1.094111000 | 2.202815000 |
| 1 | 1.562363000  | -0.844486000 | 3.636573000 |



|    |              |              |              |
|----|--------------|--------------|--------------|
| 1  | -0.462083000 | 3.250776000  | 2.419103000  |
| 1  | 1.244192000  | 1.512748000  | 2.722525000  |
| 6  | -1.118599000 | 3.457461000  | -0.748024000 |
| 1  | -0.502000000 | 4.359124000  | -0.871777000 |
| 6  | -2.605109000 | -2.746929000 | 0.020941000  |
| 1  | -1.912440000 | -3.160748000 | 0.771602000  |
| 6  | 3.815326000  | -0.021524000 | -0.820374000 |
| 1  | 3.684479000  | 1.023694000  | -0.501333000 |
| 23 | 0.031889000  | -0.200887000 | -0.323866000 |
| 6  | 0.146461000  | -0.242139000 | 2.061383000  |
| 1  | -1.664261000 | 2.059218000  | 1.964002000  |
| 1  | -0.126353000 | 1.149966000  | 3.737661000  |
| 1  | 1.258457000  | -2.063600000 | 2.416712000  |
| 1  | 2.874596000  | 0.491112000  | 1.908953000  |
| 1  | -0.867117000 | -2.094562000 | 2.487343000  |
| 1  | -3.209417000 | -1.308297000 | 2.476547000  |
| 6  | 5.200290000  | -0.483862000 | -0.389486000 |
| 1  | 5.977555000  | 0.139579000  | -0.846344000 |
| 1  | 5.342644000  | -0.437035000 | 0.694566000  |
| 1  | 5.398819000  | -1.513547000 | -0.706403000 |
| 6  | 3.647970000  | -0.080605000 | -2.333495000 |
| 1  | 3.765506000  | -1.103133000 | -2.712133000 |
| 1  | 2.662339000  | 0.266484000  | -2.655400000 |
| 1  | 4.404969000  | 0.530808000  | -2.837217000 |
| 6  | -4.009316000 | -3.230752000 | 0.354274000  |
| 1  | -4.035126000 | -4.325234000 | 0.409508000  |
| 1  | -4.378257000 | -2.850835000 | 1.311588000  |
| 1  | -4.728527000 | -2.939731000 | -0.418063000 |
| 6  | -2.149833000 | -3.253696000 | -1.342313000 |
| 1  | -2.800896000 | -2.901547000 | -2.148858000 |
| 1  | -1.134880000 | -2.918091000 | -1.568128000 |
| 1  | -2.162624000 | -4.349109000 | -1.374128000 |
| 6  | -1.438617000 | 2.908140000  | -2.134507000 |
| 1  | -0.538914000 | 2.630568000  | -2.691771000 |
| 1  | -2.051155000 | 2.001814000  | -2.071769000 |
| 1  | -1.991163000 | 3.643485000  | -2.730677000 |
| 6  | -2.380136000 | 3.863730000  | 0.000309000  |
| 1  | -2.162646000 | 4.345382000  | 0.957946000  |
| 1  | -2.970420000 | 4.568027000  | -0.596371000 |
| 1  | -3.030279000 | 3.006132000  | 0.208409000  |
| 6  | 2.829404000  | -2.715163000 | -0.260148000 |
| 1  | 3.452915000  | -2.707176000 | -1.166814000 |
| 6  | 1.576183000  | -3.524292000 | -0.568903000 |
| 1  | 0.862572000  | -3.496875000 | 0.264781000  |
| 1  | 1.050196000  | -3.131055000 | -1.442795000 |
| 1  | 1.823582000  | -4.574880000 | -0.762088000 |

|    |              |              |              |
|----|--------------|--------------|--------------|
| 6  | 3.632420000  | -3.357866000 | 0.862740000  |
| 1  | 3.897982000  | -4.388414000 | 0.600651000  |
| 1  | 4.563591000  | -2.828644000 | 1.080733000  |
| 1  | 3.057524000  | -3.405602000 | 1.793788000  |
| 6  | -3.739696000 | 0.023857000  | -0.469823000 |
| 1  | -3.363080000 | 1.056036000  | -0.403624000 |
| 6  | -5.045256000 | -0.029112000 | 0.314270000  |
| 1  | -5.542277000 | -0.998441000 | 0.235797000  |
| 1  | -4.905687000 | 0.183179000  | 1.378064000  |
| 1  | -5.747550000 | 0.718618000  | -0.072796000 |
| 6  | -3.946113000 | -0.286642000 | -1.947167000 |
| 1  | -4.398871000 | -1.273567000 | -2.090426000 |
| 1  | -4.621721000 | 0.441500000  | -2.409629000 |
| 1  | -3.006457000 | -0.269328000 | -2.509666000 |
| 6  | 1.602282000  | 3.086204000  | 0.210128000  |
| 1  | 2.258389000  | 2.369786000  | 0.727554000  |
| 6  | 1.636334000  | 4.404728000  | 0.967906000  |
| 1  | 2.626318000  | 4.869497000  | 0.896261000  |
| 1  | 0.918911000  | 5.129467000  | 0.565611000  |
| 1  | 1.416084000  | 4.281453000  | 2.031634000  |
| 6  | 2.103428000  | 3.240440000  | -1.221226000 |
| 1  | 3.149570000  | 3.565804000  | -1.242053000 |
| 1  | 2.032724000  | 2.303483000  | -1.783860000 |
| 1  | 1.527403000  | 3.993995000  | -1.770329000 |
| 15 | -2.281663000 | -0.915247000 | 0.222468000  |
| 15 | -0.058496000 | 2.225489000  | 0.191154000  |
| 15 | 2.401413000  | -0.898533000 | 0.018141000  |
| 7  | 0.026460000  | -0.757970000 | -3.350012000 |
| 7  | 0.022915000  | -0.561216000 | -2.126329000 |
| 1  | -0.234437000 | -1.751328000 | -3.568007000 |

[4b'<sub>psi</sub>] (TE = -3314.088377)

|   |              |              |              |
|---|--------------|--------------|--------------|
| 6 | -0.125228000 | 2.716802000  | 1.793554000  |
| 6 | 0.298079000  | 1.673782000  | 2.827893000  |
| 6 | -2.703533000 | -0.019778000 | 2.019304000  |
| 6 | -1.613159000 | -0.703364000 | 2.841284000  |
| 6 | 2.569530000  | -1.449995000 | 1.815708000  |
| 6 | 1.474512000  | -1.219101000 | 2.860839000  |
| 1 | -2.686389000 | 1.065274000  | 2.193736000  |
| 1 | -1.742645000 | -0.488698000 | 3.911370000  |
| 1 | 3.192960000  | -2.328421000 | 2.036659000  |
| 1 | 1.913262000  | -0.794363000 | 3.773677000  |
| 1 | 0.127782000  | 3.748824000  | 2.075007000  |
| 1 | 1.357700000  | 1.819978000  | 3.083877000  |
| 6 | 0.181449000  | 3.675024000  | -0.986518000 |
| 1 | 0.906063000  | 4.481464000  | -0.795686000 |

|    |              |              |              |
|----|--------------|--------------|--------------|
| 6  | -2.869884000 | -2.042740000 | -0.074938000 |
| 1  | -1.951383000 | -2.579312000 | 0.207519000  |
| 6  | 3.502302000  | -1.270490000 | -0.883585000 |
| 1  | 3.851946000  | -0.324441000 | -0.440057000 |
| 23 | 0.015775000  | -0.061467000 | -0.462984000 |
| 1  | -1.213450000 | 2.695640000  | 1.650755000  |
| 1  | -0.253688000 | 1.822031000  | 3.766942000  |
| 1  | 1.035101000  | -2.175387000 | 3.166603000  |
| 1  | 3.258858000  | -0.593752000 | 1.803175000  |
| 1  | -1.696489000 | -1.795766000 | 2.738281000  |
| 1  | -3.719951000 | -0.348110000 | 2.272475000  |
| 6  | 4.587042000  | -2.317750000 | -0.670718000 |
| 1  | 5.537230000  | -1.983309000 | -1.102755000 |
| 1  | 4.771171000  | -2.533590000 | 0.385779000  |
| 1  | 4.337328000  | -3.263468000 | -1.163150000 |
| 6  | 3.263170000  | -1.018503000 | -2.366463000 |
| 1  | 2.984055000  | -1.935869000 | -2.895355000 |
| 1  | 2.460787000  | -0.292506000 | -2.529134000 |
| 1  | 4.172208000  | -0.639746000 | -2.847863000 |
| 6  | -4.000366000 | -2.582022000 | 0.791714000  |
| 1  | -4.168888000 | -3.641593000 | 0.566305000  |
| 1  | -3.780175000 | -2.516356000 | 1.860720000  |
| 1  | -4.948470000 | -2.066183000 | 0.617418000  |
| 6  | -3.110419000 | -2.314506000 | -1.555353000 |
| 1  | -4.061199000 | -1.889125000 | -1.893908000 |
| 1  | -2.317918000 | -1.909728000 | -2.190810000 |
| 1  | -3.166000000 | -3.393333000 | -1.740328000 |
| 6  | 0.300030000  | 3.231074000  | -2.442058000 |
| 1  | 1.272583000  | 2.793683000  | -2.682559000 |
| 1  | -0.451315000 | 2.469572000  | -2.677302000 |
| 1  | 0.138422000  | 4.075932000  | -3.121060000 |
| 6  | -1.219976000 | 4.208461000  | -0.718883000 |
| 1  | -1.327548000 | 4.644893000  | 0.277424000  |
| 1  | -1.482397000 | 4.984011000  | -1.446888000 |
| 1  | -1.970574000 | 3.414721000  | -0.818719000 |
| 6  | 1.569765000  | -3.385192000 | -0.130868000 |
| 1  | 2.545933000  | -3.890408000 | -0.121594000 |
| 6  | 0.871408000  | -3.663052000 | -1.455062000 |
| 1  | -0.113654000 | -3.184098000 | -1.486704000 |
| 1  | 1.427894000  | -3.291901000 | -2.319824000 |
| 1  | 0.724182000  | -4.739948000 | -1.595407000 |
| 6  | 0.746741000  | -3.932986000 | 1.028189000  |
| 1  | 0.442661000  | -4.966175000 | 0.826306000  |
| 1  | 1.298604000  | -3.935904000 | 1.971174000  |
| 1  | -0.169596000 | -3.349951000 | 1.183446000  |
| 6  | -3.631321000 | 0.866337000  | -0.560091000 |

|    |              |              |              |
|----|--------------|--------------|--------------|
| 1  | -3.416091000 | 1.808810000  | -0.028135000 |
| 6  | -5.089691000 | 0.511344000  | -0.301617000 |
| 1  | -5.388092000 | -0.389604000 | -0.846546000 |
| 1  | -5.307529000 | 0.345999000  | 0.757447000  |
| 1  | -5.747671000 | 1.317952000  | -0.645647000 |
| 6  | -3.367805000 | 1.107123000  | -2.041089000 |
| 1  | -3.599755000 | 0.228537000  | -2.649079000 |
| 1  | -3.985189000 | 1.932498000  | -2.414182000 |
| 1  | -2.319716000 | 1.354274000  | -2.231845000 |
| 6  | 2.439715000  | 2.526715000  | 0.488712000  |
| 1  | 2.719391000  | 1.640024000  | 1.078877000  |
| 6  | 2.766744000  | 3.772149000  | 1.300444000  |
| 1  | 3.850753000  | 3.878844000  | 1.422304000  |
| 1  | 2.414484000  | 4.686092000  | 0.808490000  |
| 1  | 2.331502000  | 3.749986000  | 2.302667000  |
| 6  | 3.238907000  | 2.500571000  | -0.807777000 |
| 1  | 4.313910000  | 2.445521000  | -0.602297000 |
| 1  | 2.978612000  | 1.647247000  | -1.441456000 |
| 1  | 3.076550000  | 3.410926000  | -1.395367000 |
| 15 | -2.354146000 | -0.259738000 | 0.215904000  |
| 15 | 0.609856000  | 2.255565000  | 0.161824000  |
| 15 | 1.909877000  | -1.551988000 | 0.075989000  |
| 14 | 0.075960000  | -0.123883000 | 2.139630000  |
| 7  | -0.348349000 | -0.821538000 | -3.403820000 |
| 7  | -0.129899000 | -0.498215000 | -2.221782000 |
| 1  | 0.513453000  | -0.712344000 | -3.983225000 |

[4c'<sub>pb</sub>] (TE = -3049.421541)

|   |              |              |              |
|---|--------------|--------------|--------------|
| 6 | -0.556859000 | 2.283630000  | 2.038348000  |
| 6 | 0.287562000  | 1.313184000  | 2.862976000  |
| 6 | -2.324896000 | -0.771405000 | 2.091570000  |
| 6 | -1.026143000 | -1.141342000 | 2.800651000  |
| 6 | 2.775903000  | -0.550279000 | 1.740573000  |
| 6 | 1.677446000  | -0.997321000 | 2.701910000  |
| 1 | -2.588565000 | 0.276666000  | 2.277079000  |
| 1 | -1.211600000 | -1.113712000 | 3.890892000  |
| 1 | 3.752481000  | -0.990990000 | 1.978907000  |
| 1 | 2.032226000  | -0.813303000 | 3.732485000  |
| 1 | -0.499595000 | 3.311720000  | 2.421127000  |
| 1 | 1.324906000  | 1.685095000  | 2.869722000  |
| 6 | -1.120152000 | 3.503537000  | -0.595750000 |
| 1 | -0.517618000 | 4.423104000  | -0.621474000 |
| 6 | -2.434976000 | -2.787686000 | 0.007307000  |
| 1 | -1.652405000 | -3.212846000 | 0.656210000  |
| 6 | 3.671247000  | -0.127787000 | -0.982007000 |
| 1 | 3.615616000  | 0.926107000  | -0.666845000 |

|    |              |              |              |
|----|--------------|--------------|--------------|
| 23 | 0.012538000  | -0.116035000 | -0.640569000 |
| 1  | -1.617389000 | 2.012149000  | 2.073055000  |
| 1  | -0.031889000 | 1.405253000  | 3.917221000  |
| 1  | 1.563389000  | -2.089334000 | 2.639290000  |
| 1  | 2.914501000  | 0.538637000  | 1.793019000  |
| 1  | -0.802041000 | -2.200437000 | 2.597191000  |
| 1  | -3.181052000 | -1.357863000 | 2.451249000  |
| 6  | 5.072930000  | -0.641408000 | -0.683651000 |
| 1  | 5.822061000  | -0.036208000 | -1.206999000 |
| 1  | 5.322061000  | -0.612384000 | 0.380995000  |
| 1  | 5.205700000  | -1.671738000 | -1.030378000 |
| 6  | 3.375083000  | -0.187960000 | -2.474828000 |
| 1  | 3.367388000  | -1.221354000 | -2.842841000 |
| 1  | 2.398965000  | 0.244520000  | -2.709752000 |
| 1  | 4.139313000  | 0.348670000  | -3.048146000 |
| 6  | -3.780803000 | -3.332006000 | 0.467582000  |
| 1  | -3.770334000 | -4.428100000 | 0.464681000  |
| 1  | -4.056316000 | -3.016591000 | 1.477934000  |
| 1  | -4.586338000 | -3.026452000 | -0.207682000 |
| 6  | -2.135764000 | -3.231024000 | -1.422262000 |
| 1  | -2.964621000 | -3.003767000 | -2.097959000 |
| 1  | -1.249618000 | -2.743649000 | -1.835186000 |
| 1  | -1.978848000 | -4.314817000 | -1.463044000 |
| 6  | -1.402109000 | 3.077788000  | -2.032881000 |
| 1  | -0.487150000 | 2.859994000  | -2.592071000 |
| 1  | -2.007248000 | 2.164644000  | -2.067774000 |
| 1  | -1.946613000 | 3.860648000  | -2.573201000 |
| 6  | -2.411236000 | 3.822525000  | 0.146028000  |
| 1  | -2.234989000 | 4.247279000  | 1.137727000  |
| 1  | -3.006192000 | 4.548053000  | -0.419661000 |
| 1  | -3.041811000 | 2.935886000  | 0.278698000  |
| 6  | 2.624121000  | -2.763875000 | -0.189527000 |
| 1  | 3.041128000  | -2.850172000 | -1.205138000 |
| 6  | 1.323093000  | -3.555992000 | -0.152137000 |
| 1  | 0.820998000  | -3.452599000 | 0.817990000  |
| 1  | 0.618152000  | -3.214078000 | -0.913122000 |
| 1  | 1.508996000  | -4.624349000 | -0.313522000 |
| 6  | 3.628025000  | -3.348504000 | 0.797354000  |
| 1  | 3.834096000  | -4.396490000 | 0.551300000  |
| 1  | 4.585884000  | -2.824961000 | 0.808906000  |
| 1  | 3.236843000  | -3.335655000 | 1.819895000  |
| 6  | -3.611820000 | -0.021620000 | -0.409655000 |
| 1  | -3.236056000 | 1.011430000  | -0.356970000 |
| 6  | -4.898952000 | -0.078310000 | 0.404097000  |
| 1  | -5.353206000 | -1.072232000 | 0.400830000  |
| 1  | -4.753282000 | 0.211875000  | 1.448167000  |

|    |              |              |              |
|----|--------------|--------------|--------------|
| 1  | -5.640342000 | 0.609952000  | -0.018780000 |
| 6  | -3.854902000 | -0.335262000 | -1.880642000 |
| 1  | -4.345667000 | -1.306132000 | -2.005333000 |
| 1  | -4.518689000 | 0.412396000  | -2.329353000 |
| 1  | -2.928436000 | -0.352885000 | -2.463623000 |
| 6  | 1.617400000  | 3.050126000  | 0.270824000  |
| 1  | 2.283041000  | 2.294366000  | 0.713482000  |
| 6  | 1.700778000  | 4.313752000  | 1.114015000  |
| 1  | 2.691592000  | 4.774006000  | 1.026680000  |
| 1  | 0.973574000  | 5.070536000  | 0.797267000  |
| 1  | 1.529639000  | 4.119077000  | 2.176121000  |
| 6  | 2.076193000  | 3.298299000  | -1.161444000 |
| 1  | 3.124437000  | 3.616172000  | -1.189399000 |
| 1  | 1.982304000  | 2.402311000  | -1.785217000 |
| 1  | 1.492313000  | 4.092712000  | -1.640107000 |
| 15 | -2.138636000 | -0.957343000 | 0.262650000  |
| 15 | -0.058497000 | 2.207595000  | 0.264086000  |
| 15 | 2.287489000  | -0.918293000 | -0.001122000 |
| 5  | 0.274258000  | -0.257081000 | 2.542312000  |
| 7  | -0.421105000 | -0.552998000 | -3.631627000 |
| 7  | -0.159218000 | -0.361323000 | -2.425432000 |
| 1  | 0.446545000  | -0.491432000 | -4.208521000 |

**[4d'<sub>sc</sub>]-Quartet (TE = -2877.804475)**

|    |              |              |              |
|----|--------------|--------------|--------------|
| 6  | 0.037364000  | 2.068077000  | 1.649338000  |
| 6  | 0.290260000  | 0.866863000  | 2.554441000  |
| 6  | -2.481474000 | -0.188018000 | 1.943793000  |
| 6  | -1.319509000 | -1.067565000 | 2.355681000  |
| 6  | 2.465474000  | -1.258004000 | 1.703127000  |
| 6  | 1.126408000  | -1.488586000 | 2.383130000  |
| 1  | -2.458877000 | 0.773148000  | 2.468682000  |
| 1  | -1.386695000 | -1.195956000 | 3.458071000  |
| 1  | 3.257602000  | -1.905083000 | 2.094305000  |
| 1  | 1.296581000  | -1.443743000 | 3.478543000  |
| 1  | 0.394172000  | 3.002359000  | 2.096875000  |
| 1  | 1.337053000  | 0.937808000  | 2.885161000  |
| 6  | 0.469912000  | 3.113650000  | -1.031359000 |
| 1  | 1.207119000  | 2.994115000  | -1.836304000 |
| 6  | -3.560361000 | -0.952586000 | -0.667586000 |
| 1  | -3.111776000 | -1.944345000 | -0.532465000 |
| 6  | 3.577446000  | -0.473877000 | -0.798816000 |
| 1  | 3.453306000  | 0.487736000  | -0.285670000 |
| 23 | -0.035647000 | -0.572675000 | -0.334013000 |
| 16 | -2.416342000 | 0.253016000  | 0.157528000  |
| 16 | 0.961267000  | 1.733708000  | 0.102544000  |
| 16 | 2.261473000  | -1.566795000 | -0.093628000 |

|   |              |              |              |
|---|--------------|--------------|--------------|
| 6 | 0.037659000  | -0.518152000 | 1.922147000  |
| 1 | -1.021779000 | 2.197440000  | 1.396552000  |
| 1 | -0.299960000 | 1.012680000  | 3.478929000  |
| 1 | 0.808595000  | -2.523852000 | 2.188297000  |
| 1 | 2.794433000  | -0.215706000 | 1.808760000  |
| 1 | -1.463081000 | -2.073840000 | 1.932732000  |
| 1 | -3.458649000 | -0.629166000 | 2.155937000  |
| 6 | 4.954457000  | -1.042140000 | -0.519639000 |
| 1 | 5.729432000  | -0.376396000 | -0.915787000 |
| 1 | 5.143872000  | -1.161014000 | 0.550783000  |
| 1 | 5.085524000  | -2.020469000 | -0.992366000 |
| 6 | 3.296344000  | -0.300762000 | -2.278662000 |
| 1 | 3.342029000  | -1.255472000 | -2.812906000 |
| 1 | 2.303519000  | 0.126287000  | -2.455503000 |
| 1 | 4.039905000  | 0.363261000  | -2.731537000 |
| 6 | -4.954798000 | -0.909972000 | -0.077885000 |
| 1 | -5.608621000 | -1.593311000 | -0.630390000 |
| 1 | -4.991353000 | -1.216775000 | 0.969881000  |
| 1 | -5.388761000 | 0.092344000  | -0.151747000 |
| 6 | -3.559395000 | -0.583138000 | -2.140009000 |
| 1 | -4.005641000 | 0.405339000  | -2.295323000 |
| 1 | -2.551571000 | -0.582136000 | -2.559344000 |
| 1 | -4.151315000 | -1.308301000 | -2.706955000 |
| 6 | -0.922104000 | 2.935583000  | -1.601645000 |
| 1 | -1.036276000 | 1.964759000  | -2.093534000 |
| 1 | -1.691085000 | 3.004750000  | -0.826134000 |
| 1 | -1.130717000 | 3.717548000  | -2.340589000 |
| 6 | 0.667624000  | 4.464443000  | -0.370634000 |
| 1 | 1.666086000  | 4.572748000  | 0.060939000  |
| 1 | 0.529598000  | 5.267643000  | -1.102115000 |
| 1 | -0.063885000 | 4.631090000  | 0.426263000  |
| 7 | -0.932168000 | -2.729558000 | -2.350897000 |
| 7 | -0.563515000 | -1.839532000 | -1.569681000 |
| 1 | -0.933323000 | -3.664077000 | -1.871323000 |

**[4e'<sub>ssi</sub>]-Quartet (TE = -3129.217811)**

|   |              |              |             |
|---|--------------|--------------|-------------|
| 6 | 0.568605000  | -0.627420000 | 2.506636000 |
| 6 | 0.217825000  | 0.830920000  | 2.763949000 |
| 6 | 2.749086000  | 2.023091000  | 0.743358000 |
| 6 | 1.592281000  | 2.953848000  | 1.075017000 |
| 6 | -2.724435000 | 1.734989000  | 0.890926000 |
| 6 | -1.645598000 | 2.749782000  | 1.245046000 |
| 1 | 2.930433000  | 1.322838000  | 1.567456000 |
| 1 | 1.806318000  | 3.461047000  | 2.025428000 |
| 1 | -3.728814000 | 2.170710000  | 0.860176000 |
| 1 | -1.866104000 | 3.156182000  | 2.241729000 |

|    |              |              |              |
|----|--------------|--------------|--------------|
| 1  | 0.443647000  | -1.270761000 | 3.385281000  |
| 1  | -0.725771000 | 0.876628000  | 3.325500000  |
| 6  | -0.217401000 | -3.028709000 | 1.054981000  |
| 1  | -0.909566000 | -3.313012000 | 0.251088000  |
| 6  | 3.837868000  | -0.001853000 | -0.967165000 |
| 1  | 4.656143000  | 0.710135000  | -1.139250000 |
| 6  | -3.584062000 | -0.446853000 | -0.681707000 |
| 1  | -3.355136000 | -0.942762000 | 0.271857000  |
| 23 | -0.018971000 | 0.180586000  | -0.837081000 |
| 16 | 2.325417000  | 1.056849000  | -0.768330000 |
| 16 | -0.564939000 | -1.211979000 | 1.179396000  |
| 16 | -2.400439000 | 0.981094000  | -0.764396000 |
| 1  | 1.597724000  | -0.738399000 | 2.142802000  |
| 1  | 0.980923000  | 1.271507000  | 3.420444000  |
| 1  | -1.688332000 | 3.596937000  | 0.549017000  |
| 1  | -2.738169000 | 0.902539000  | 1.608504000  |
| 1  | 1.506704000  | 3.733189000  | 0.308564000  |
| 1  | 3.693135000  | 2.540949000  | 0.534971000  |
| 6  | -5.024018000 | 0.027293000  | -0.694680000 |
| 1  | -5.705922000 | -0.828310000 | -0.634636000 |
| 1  | -5.257462000 | 0.685249000  | 0.145957000  |
| 1  | -5.254956000 | 0.568385000  | -1.617608000 |
| 6  | -3.272220000 | -1.383577000 | -1.832481000 |
| 1  | -3.407845000 | -0.890524000 | -2.800988000 |
| 1  | -2.242431000 | -1.751279000 | -1.795529000 |
| 1  | -3.944124000 | -2.247746000 | -1.808907000 |
| 6  | 4.134101000  | -0.843943000 | 0.255911000  |
| 1  | 5.007017000  | -1.481704000 | 0.076296000  |
| 1  | 4.352877000  | -0.244129000 | 1.143003000  |
| 1  | 3.290819000  | -1.500152000 | 0.489477000  |
| 6  | 3.619218000  | -0.844433000 | -2.208400000 |
| 1  | 2.752923000  | -1.504429000 | -2.090779000 |
| 1  | 3.436753000  | -0.233301000 | -3.095504000 |
| 1  | 4.496076000  | -1.470401000 | -2.402292000 |
| 6  | 1.200773000  | -3.319009000 | 0.613369000  |
| 1  | 1.453811000  | -2.778649000 | -0.304074000 |
| 1  | 1.924586000  | -3.041882000 | 1.387281000  |
| 1  | 1.332884000  | -4.389340000 | 0.421156000  |
| 6  | -0.602507000 | -3.757117000 | 2.328566000  |
| 1  | -1.624846000 | -3.528691000 | 2.639555000  |
| 1  | -0.529954000 | -4.840622000 | 2.184656000  |
| 1  | 0.064928000  | -3.502709000 | 3.157774000  |
| 14 | 0.033942000  | 1.848737000  | 1.118463000  |
| 7  | 0.236561000  | -0.459515000 | -3.837850000 |
| 7  | 0.120209000  | -0.178262000 | -2.637295000 |
| 1  | -0.142207000 | 0.313665000  | -4.434700000 |



[4f<sub>SB</sub>] (TE = -2864.561466)

|    |              |              |              |
|----|--------------|--------------|--------------|
| 6  | -0.730051000 | -2.223349000 | 1.667266000  |
| 6  | -0.732555000 | -0.949190000 | 2.497148000  |
| 6  | 2.588181000  | -0.939180000 | 1.349640000  |
| 6  | 1.858935000  | -0.047003000 | 2.339467000  |
| 6  | -1.594623000 | 2.075288000  | 1.891033000  |
| 6  | -0.205155000 | 1.726582000  | 2.389332000  |
| 1  | 2.135832000  | -1.933710000 | 1.276286000  |
| 1  | 1.988913000  | -0.515045000 | 3.332421000  |
| 1  | -1.911116000 | 3.090594000  | 2.152202000  |
| 1  | -0.209634000 | 1.898017000  | 3.483333000  |
| 1  | -1.430571000 | -2.978794000 | 2.040482000  |
| 1  | -1.772095000 | -0.589370000 | 2.537182000  |
| 6  | -0.772729000 | -3.254285000 | -1.037635000 |
| 1  | -1.244297000 | -3.023629000 | -2.001343000 |
| 6  | 3.329640000  | 1.344410000  | -0.208953000 |
| 1  | 2.633358000  | 1.950307000  | 0.385951000  |
| 6  | -3.372031000 | 1.206869000  | -0.164464000 |
| 1  | -3.385400000 | 0.303027000  | 0.460163000  |
| 23 | 0.092757000  | 0.291167000  | -0.605485000 |
| 16 | 2.518372000  | -0.322211000 | -0.376316000 |
| 16 | -1.241965000 | -1.767948000 | -0.036787000 |
| 16 | -1.677822000 | 1.928599000  | 0.054715000  |
| 1  | 0.262224000  | -2.685400000 | 1.617490000  |
| 1  | -0.511861000 | -1.250176000 | 3.537091000  |
| 1  | 0.511953000  | 2.467691000  | 2.005224000  |
| 1  | -2.348714000 | 1.386608000  | 2.287836000  |
| 1  | 2.409879000  | 0.902609000  | 2.415808000  |
| 1  | 3.644214000  | -1.102323000 | 1.595564000  |
| 6  | -4.433875000 | 2.184233000  | 0.297707000  |
| 1  | -5.430743000 | 1.742090000  | 0.191040000  |
| 1  | -4.313716000 | 2.465494000  | 1.347335000  |
| 1  | -4.412668000 | 3.102172000  | -0.298002000 |
| 6  | -3.525605000 | 0.821754000  | -1.622137000 |
| 1  | -3.443517000 | 1.696313000  | -2.276303000 |
| 1  | -2.763124000 | 0.101872000  | -1.934323000 |
| 1  | -4.508899000 | 0.372043000  | -1.793783000 |
| 6  | 4.670180000  | 1.236497000  | 0.488592000  |
| 1  | 5.155170000  | 2.218201000  | 0.509897000  |
| 1  | 4.586354000  | 0.897937000  | 1.524115000  |
| 1  | 5.341479000  | 0.551115000  | -0.039349000 |
| 6  | 3.449782000  | 1.931020000  | -1.601856000 |
| 1  | 4.109602000  | 1.325328000  | -2.231949000 |
| 1  | 2.482847000  | 2.013358000  | -2.101325000 |
| 1  | 3.883716000  | 2.934373000  | -1.542813000 |

|   |              |              |              |
|---|--------------|--------------|--------------|
| 6 | 0.72460000   | -3.377459000 | -1.231569000 |
| 1 | 1.146430000  | -2.494512000 | -1.717963000 |
| 1 | 1.247016000  | -3.519884000 | -0.278826000 |
| 1 | 0.957522000  | -4.247922000 | -1.854728000 |
| 6 | -1.397106000 | -4.509271000 | -0.457859000 |
| 1 | -2.473046000 | -4.400362000 | -0.299998000 |
| 1 | -1.240811000 | -5.356617000 | -1.133491000 |
| 1 | -0.941858000 | -4.777456000 | 0.500674000  |
| 5 | 0.292948000  | 0.229930000  | 2.098168000  |
| 7 | 0.336269000  | 1.567561000  | -3.389843000 |
| 7 | 0.198616000  | 0.965289000  | -2.317714000 |
| 1 | -0.219666000 | 1.103094000  | -4.147755000 |

[4a''<sub>PC</sub>]-Quartet (TE = -3519.926040)

|    |              |              |              |
|----|--------------|--------------|--------------|
| 6  | 1.217672000  | -0.630432000 | 1.763382000  |
| 6  | 1.811855000  | -0.099233000 | 2.919605000  |
| 1  | 1.321268000  | 0.728883000  | 3.428516000  |
| 6  | 3.003517000  | -0.598700000 | 3.434444000  |
| 1  | 3.433847000  | -0.151388000 | 4.328929000  |
| 6  | 3.636112000  | -1.672216000 | 2.817641000  |
| 1  | 4.566545000  | -2.071767000 | 3.214875000  |
| 6  | 3.073312000  | -2.217160000 | 1.667350000  |
| 1  | 3.591272000  | -3.030998000 | 1.162222000  |
| 6  | 1.892647000  | -1.703978000 | 1.121249000  |
| 6  | -0.371883000 | 1.312618000  | 1.694729000  |
| 6  | -1.266221000 | 1.587784000  | 2.743580000  |
| 1  | -1.756214000 | 0.760119000  | 3.252010000  |
| 6  | -1.561248000 | 2.886379000  | 3.141509000  |
| 1  | -2.271309000 | 3.054885000  | 3.949356000  |
| 6  | -0.951647000 | 3.963615000  | 2.509316000  |
| 1  | -1.179695000 | 4.985073000  | 2.805746000  |
| 6  | -0.047113000 | 3.719034000  | 1.481412000  |
| 1  | 0.415190000  | 4.565810000  | 0.982933000  |
| 6  | 0.242215000  | 2.417450000  | 1.060304000  |
| 6  | -1.263987000 | -0.968894000 | 1.591680000  |
| 6  | -1.268088000 | -1.803885000 | 2.716252000  |
| 1  | -0.356800000 | -1.898795000 | 3.305373000  |
| 6  | -2.404872000 | -2.508045000 | 3.098770000  |
| 1  | -2.370719000 | -3.154934000 | 3.973834000  |
| 6  | -3.585806000 | -2.375651000 | 2.376767000  |
| 1  | -4.480514000 | -2.918251000 | 2.673720000  |
| 6  | -3.611224000 | -1.540726000 | 1.262543000  |
| 1  | -4.535137000 | -1.439932000 | 0.698334000  |
| 6  | -2.467179000 | -0.853267000 | 0.851429000  |
| 6  | -0.088257000 | -0.099042000 | 1.233176000  |
| 23 | 0.085930000  | -0.088585000 | -1.135722000 |

|    |              |              |              |
|----|--------------|--------------|--------------|
| 6  | 2.878185000  | -2.479337000 | -1.520162000 |
| 1  | 3.490492000  | -3.198081000 | -0.959721000 |
| 6  | 0.976367000  | 3.540887000  | -1.535664000 |
| 1  | -0.083812000 | 3.770599000  | -1.343317000 |
| 6  | -3.395552000 | -0.712140000 | -2.002396000 |
| 1  | -3.045290000 | -0.192994000 | -2.908023000 |
| 6  | -4.911871000 | -0.565818000 | -1.947735000 |
| 1  | -5.359078000 | -1.043917000 | -2.827129000 |
| 1  | -5.354498000 | -1.049636000 | -1.072829000 |
| 1  | -5.243320000 | 0.474110000  | -1.950847000 |
| 6  | -2.992643000 | -2.176488000 | -2.141134000 |
| 1  | -3.317594000 | -2.764462000 | -1.275629000 |
| 1  | -3.458199000 | -2.616993000 | -3.029116000 |
| 1  | -1.909282000 | -2.294449000 | -2.241184000 |
| 6  | 2.539999000  | -3.071805000 | -2.884239000 |
| 1  | 2.119020000  | -4.078611000 | -2.820939000 |
| 1  | 1.818801000  | -2.446393000 | -3.422524000 |
| 1  | 3.439334000  | -3.138080000 | -3.506212000 |
| 6  | 3.669260000  | -1.193529000 | -1.679491000 |
| 1  | 3.886374000  | -0.715920000 | -0.719237000 |
| 1  | 4.625026000  | -1.380963000 | -2.181945000 |
| 1  | 3.111516000  | -0.472822000 | -2.287040000 |
| 6  | 1.789514000  | 4.806598000  | -1.276778000 |
| 1  | 1.409864000  | 5.622695000  | -1.902389000 |
| 1  | 1.758749000  | 5.156990000  | -0.244217000 |
| 1  | 2.841551000  | 4.678137000  | -1.541722000 |
| 6  | 1.102214000  | 3.133489000  | -3.001194000 |
| 1  | 2.131968000  | 2.860055000  | -3.257730000 |
| 1  | 0.469149000  | 2.273969000  | -3.234670000 |
| 1  | 0.817406000  | 3.963012000  | -3.658233000 |
| 15 | -2.336875000 | 0.108341000  | -0.697003000 |
| 15 | 1.226153000  | 2.038964000  | -0.432784000 |
| 15 | 1.307523000  | -2.168321000 | -0.550058000 |
| 6  | 3.013292000  | 2.018208000  | 0.150871000  |
| 1  | 3.089885000  | 0.999722000  | 0.559553000  |
| 6  | 3.997541000  | 2.130903000  | -1.008865000 |
| 1  | 4.112517000  | 3.163364000  | -1.348012000 |
| 1  | 4.991604000  | 1.787590000  | -0.701754000 |
| 1  | 3.704902000  | 1.532388000  | -1.874364000 |
| 6  | 3.351670000  | 2.986900000  | 1.274702000  |
| 1  | 4.376771000  | 2.815765000  | 1.624093000  |
| 1  | 3.293488000  | 4.031805000  | 0.954903000  |
| 1  | 2.689162000  | 2.866461000  | 2.135733000  |
| 6  | 0.607160000  | -3.909722000 | -0.504297000 |
| 1  | 0.334908000  | -4.079912000 | -1.556580000 |
| 6  | -0.656724000 | -4.015881000 | 0.330466000  |

|   |              |              |              |
|---|--------------|--------------|--------------|
| 1 | -0.433417000 | -3.921340000 | 1.396416000  |
| 1 | -1.394480000 | -3.249324000 | 0.084063000  |
| 1 | -1.126795000 | -4.994685000 | 0.182740000  |
| 6 | 1.607767000  | -4.973689000 | -0.071315000 |
| 1 | 1.136757000  | -5.963162000 | -0.084397000 |
| 1 | 2.490681000  | -5.033167000 | -0.712431000 |
| 1 | 1.949563000  | -4.800999000 | 0.955118000  |
| 6 | -3.076699000 | 1.795390000  | -0.376534000 |
| 1 | -2.284173000 | 2.280347000  | 0.207465000  |
| 6 | -4.341158000 | 1.831596000  | 0.469615000  |
| 1 | -4.608679000 | 2.868169000  | 0.706402000  |
| 1 | -5.204405000 | 1.382520000  | -0.028566000 |
| 1 | -4.201191000 | 1.309823000  | 1.420847000  |
| 6 | -3.196404000 | 2.563011000  | -1.688409000 |
| 1 | -3.417468000 | 3.619204000  | -1.499589000 |
| 1 | -2.265343000 | 2.520716000  | -2.266997000 |
| 1 | -3.995397000 | 2.179390000  | -2.330637000 |
| 7 | -0.291306000 | -0.504998000 | -4.135342000 |
| 7 | -0.054796000 | -0.240932000 | -2.947049000 |
| 1 | 0.019165000  | 0.279219000  | -4.754654000 |

**[4b''<sub>psi</sub>]-Quartet (TE = -3771.336353)**

|   |              |              |             |
|---|--------------|--------------|-------------|
| 6 | 1.294863000  | -1.351887000 | 1.962691000 |
| 6 | 1.243951000  | -1.994159000 | 3.206199000 |
| 1 | 0.412837000  | -1.789096000 | 3.882584000 |
| 6 | 2.213145000  | -2.916364000 | 3.588323000 |
| 1 | 2.146801000  | -3.414288000 | 4.554063000 |
| 6 | 3.263172000  | -3.209081000 | 2.723527000 |
| 1 | 4.022624000  | -3.934215000 | 3.009241000 |
| 6 | 3.336117000  | -2.583049000 | 1.482907000 |
| 1 | 4.157012000  | -2.837491000 | 0.816974000 |
| 6 | 2.358287000  | -1.663111000 | 1.091148000 |
| 6 | 0.250061000  | 1.521193000  | 2.167225000 |
| 6 | 0.670840000  | 1.672491000  | 3.493838000 |
| 1 | 0.824219000  | 0.786105000  | 4.111545000 |
| 6 | 0.939206000  | 2.925942000  | 4.034593000 |
| 1 | 1.282298000  | 3.018515000  | 5.063566000 |
| 6 | 0.779384000  | 4.061751000  | 3.247381000 |
| 1 | 0.994663000  | 5.047129000  | 3.655950000 |
| 6 | 0.354315000  | 3.937967000  | 1.928053000 |
| 1 | 0.249503000  | 4.838779000  | 1.330066000 |
| 6 | 0.096000000  | 2.678958000  | 1.376175000 |
| 6 | -1.730551000 | -0.767680000 | 1.851969000 |
| 6 | -2.248091000 | -0.597187000 | 3.142567000 |
| 1 | -1.616070000 | -0.165460000 | 3.920161000 |
| 6 | -3.566427000 | -0.917160000 | 3.448112000 |

|    |              |              |              |
|----|--------------|--------------|--------------|
| 1  | -3.951125000 | -0.760193000 | 4.454296000  |
| 6  | -4.399221000 | -1.418589000 | 2.452288000  |
| 1  | -5.437820000 | -1.656189000 | 2.673712000  |
| 6  | -3.905953000 | -1.608568000 | 1.166250000  |
| 1  | -4.576782000 | -1.992102000 | 0.403232000  |
| 6  | -2.579358000 | -1.290529000 | 0.853840000  |
| 23 | 0.096817000  | 0.105205000  | -1.219312000 |
| 6  | 3.720965000  | 0.430315000  | -0.370638000 |
| 1  | 4.640804000  | -0.134938000 | -0.167886000 |
| 6  | -2.185072000 | 3.015122000  | -0.364043000 |
| 1  | -2.148505000 | 4.067883000  | -0.051115000 |
| 6  | -1.518225000 | -3.298752000 | -1.005602000 |
| 1  | -1.658839000 | -3.492313000 | -2.080254000 |
| 6  | -2.443392000 | -4.204425000 | -0.203325000 |
| 1  | -2.231491000 | -5.255381000 | -0.431657000 |
| 1  | -2.285104000 | -4.069371000 | 0.871429000  |
| 1  | -3.503739000 | -4.038213000 | -0.396409000 |
| 6  | -0.071444000 | -3.608410000 | -0.654309000 |
| 1  | 0.147057000  | -3.382297000 | 0.395575000  |
| 1  | 0.145978000  | -4.671531000 | -0.809729000 |
| 1  | 0.623243000  | -3.029975000 | -1.265462000 |
| 6  | 3.883144000  | 1.221098000  | -1.661675000 |
| 1  | 4.014100000  | 0.590069000  | -2.546069000 |
| 1  | 2.998078000  | 1.840593000  | -1.840412000 |
| 1  | 4.747482000  | 1.892256000  | -1.605011000 |
| 6  | 3.462942000  | 1.365829000  | 0.799798000  |
| 1  | 3.324888000  | 0.833971000  | 1.745936000  |
| 1  | 4.303469000  | 2.057360000  | 0.927290000  |
| 1  | 2.566169000  | 1.971480000  | 0.635320000  |
| 6  | -2.798991000 | 2.920233000  | -1.753821000 |
| 1  | -3.823921000 | 3.308145000  | -1.754373000 |
| 1  | -2.241216000 | 3.473256000  | -2.514746000 |
| 1  | -2.845229000 | 1.876773000  | -2.084867000 |
| 6  | -3.025778000 | 2.244766000  | 0.640962000  |
| 1  | -3.139631000 | 1.198123000  | 0.344580000  |
| 1  | -2.599886000 | 2.252524000  | 1.648672000  |
| 1  | -4.032002000 | 2.674352000  | 0.702691000  |
| 14 | -0.017803000 | -0.149892000 | 1.294805000  |
| 15 | -0.400005000 | 2.428965000  | -0.389709000 |
| 15 | -1.870255000 | -1.450563000 | -0.843907000 |
| 15 | 2.358769000  | -0.844348000 | -0.565266000 |
| 6  | 3.170916000  | -2.155956000 | -1.670311000 |
| 1  | 2.853471000  | -3.096256000 | -1.196464000 |
| 6  | 4.695261000  | -2.155892000 | -1.735489000 |
| 1  | 5.039905000  | -3.024732000 | -2.307553000 |
| 1  | 5.083213000  | -1.271248000 | -2.249203000 |

|   |              |              |              |
|---|--------------|--------------|--------------|
| 1 | 5.185017000  | -2.201456000 | -0.760188000 |
| 6 | 2.595049000  | -2.120170000 | -3.080284000 |
| 1 | 1.502494000  | -2.156064000 | -3.091656000 |
| 1 | 2.874582000  | -1.204577000 | -3.610977000 |
| 1 | 2.971507000  | -2.964379000 | -3.669074000 |
| 6 | -3.326231000 | -1.190024000 | -2.020644000 |
| 1 | -3.873776000 | -0.351411000 | -1.561019000 |
| 6 | -2.787132000 | -0.733409000 | -3.373307000 |
| 1 | -2.168539000 | -1.507254000 | -3.843012000 |
| 1 | -3.612162000 | -0.517652000 | -4.061341000 |
| 1 | -2.162322000 | 0.157595000  | -3.299281000 |
| 6 | -4.298395000 | -2.343978000 | -2.248448000 |
| 1 | -3.796285000 | -3.220621000 | -2.670065000 |
| 1 | -4.831394000 | -2.670583000 | -1.354907000 |
| 1 | -5.059986000 | -2.042404000 | -2.976452000 |
| 6 | 0.471007000  | 3.849199000  | -1.295558000 |
| 1 | 1.428908000  | 3.926261000  | -0.757380000 |
| 6 | -0.211172000 | 5.214950000  | -1.268579000 |
| 1 | 0.455441000  | 5.970092000  | -1.699868000 |
| 1 | -1.122674000 | 5.222069000  | -1.873955000 |
| 1 | -0.487684000 | 5.565141000  | -0.272817000 |
| 6 | 0.772948000  | 3.474113000  | -2.742244000 |
| 1 | 1.348069000  | 2.550402000  | -2.811593000 |
| 1 | -0.145312000 | 3.321579000  | -3.320899000 |
| 1 | 1.338743000  | 4.272928000  | -3.235061000 |
| 7 | 0.564142000  | 0.316976000  | -4.240465000 |
| 7 | 0.380328000  | 0.269370000  | -3.017434000 |
| 1 | 0.895603000  | 1.268559000  | -4.528102000 |

[4c''<sub>PB</sub>] (TE = -3506.679846)

|   |              |              |             |
|---|--------------|--------------|-------------|
| 6 | 1.468285000  | -0.617742000 | 1.906813000 |
| 6 | 1.585443000  | -1.361187000 | 3.095712000 |
| 1 | 0.679015000  | -1.623673000 | 3.641508000 |
| 6 | 2.812015000  | -1.780425000 | 3.599058000 |
| 1 | 2.853273000  | -2.357604000 | 4.521271000 |
| 6 | 3.982973000  | -1.466079000 | 2.918058000 |
| 1 | 4.949660000  | -1.790599000 | 3.297601000 |
| 6 | 3.903729000  | -0.746419000 | 1.731664000 |
| 1 | 4.820759000  | -0.527215000 | 1.189766000 |
| 6 | 2.669908000  | -0.330300000 | 1.219584000 |
| 6 | -0.442767000 | 1.336680000  | 1.944657000 |
| 6 | -0.005654000 | 1.809672000  | 3.194151000 |
| 1 | 0.740483000  | 1.231734000  | 3.740937000 |
| 6 | -0.492748000 | 2.983690000  | 3.758548000 |
| 1 | -0.120451000 | 3.317794000  | 4.725695000 |
| 6 | -1.462946000 | 3.724358000  | 3.091456000 |

|    |              |              |              |
|----|--------------|--------------|--------------|
| 1  | -1.859737000 | 4.638620000  | 3.527789000  |
| 6  | -1.910714000 | 3.290690000  | 1.847997000  |
| 1  | -2.658558000 | 3.879957000  | 1.321577000  |
| 6  | -1.398470000 | 2.128992000  | 1.262338000  |
| 6  | -1.146297000 | -1.215658000 | 1.679688000  |
| 6  | -1.858844000 | -1.183310000 | 2.893036000  |
| 1  | -1.642187000 | -0.386679000 | 3.605690000  |
| 6  | -2.842865000 | -2.111148000 | 3.207856000  |
| 1  | -3.374038000 | -2.043248000 | 4.155857000  |
| 6  | -3.158760000 | -3.115848000 | 2.298980000  |
| 1  | -3.937494000 | -3.842051000 | 2.522655000  |
| 6  | -2.476086000 | -3.176672000 | 1.091255000  |
| 1  | -2.743737000 | -3.954226000 | 0.382051000  |
| 6  | -1.477377000 | -2.246873000 | 0.773220000  |
| 23 | 0.143122000  | 0.203170000  | -1.157103000 |
| 6  | 3.197594000  | 2.189310000  | -0.193883000 |
| 1  | 4.244149000  | 2.072381000  | 0.123293000  |
| 6  | -3.632029000 | 1.268070000  | -0.474789000 |
| 1  | -4.127789000 | 2.207492000  | -0.191847000 |
| 6  | 0.472629000  | -3.686587000 | -0.961671000 |
| 1  | 0.403524000  | -4.000905000 | -2.013886000 |
| 6  | 0.066729000  | -4.850311000 | -0.069160000 |
| 1  | 0.751751000  | -5.693477000 | -0.214290000 |
| 1  | 0.115148000  | -4.570655000 | 0.988358000  |
| 1  | -0.942990000 | -5.216969000 | -0.262498000 |
| 6  | 1.914918000  | -3.290449000 | -0.692214000 |
| 1  | 2.049205000  | -2.896596000 | 0.320631000  |
| 1  | 2.580174000  | -4.155059000 | -0.797858000 |
| 1  | 2.251141000  | -2.524010000 | -1.391837000 |
| 6  | 3.157057000  | 2.946874000  | -1.516997000 |
| 1  | 3.839901000  | 2.533518000  | -2.263588000 |
| 1  | 2.160446000  | 2.927859000  | -1.965821000 |
| 1  | 3.434225000  | 3.996876000  | -1.371397000 |
| 6  | 2.449435000  | 2.923279000  | 0.908465000  |
| 1  | 2.518822000  | 2.402486000  | 1.867798000  |
| 1  | 2.861830000  | 3.929432000  | 1.044290000  |
| 1  | 1.385038000  | 3.033066000  | 0.682187000  |
| 6  | -4.053487000 | 0.884860000  | -1.888418000 |
| 1  | -5.136153000 | 0.727085000  | -1.945122000 |
| 1  | -3.794032000 | 1.639523000  | -2.637061000 |
| 1  | -3.572278000 | -0.049573000 | -2.197982000 |
| 6  | -4.039965000 | 0.204686000  | 0.528458000  |
| 1  | -3.603881000 | -0.769846000 | 0.290924000  |
| 1  | -3.734916000 | 0.456094000  | 1.547479000  |
| 1  | -5.129095000 | 0.082185000  | 0.527487000  |
| 5  | 0.007974000  | -0.123540000 | 1.476291000  |

|    |              |              |              |
|----|--------------|--------------|--------------|
| 7  | 0.371873000  | 1.638350000  | -3.846127000 |
| 7  | 0.275535000  | 0.954120000  | -2.818688000 |
| 1  | 0.130208000  | 1.065252000  | -4.689777000 |
| 15 | -0.669172000 | -2.190110000 | -0.869843000 |
| 15 | 2.527726000  | 0.459773000  | -0.425463000 |
| 15 | -1.801924000 | 1.647962000  | -0.458588000 |
| 6  | -2.025146000 | -2.622829000 | -2.107182000 |
| 1  | -2.910158000 | -2.117069000 | -1.692026000 |
| 6  | -2.365030000 | -4.094081000 | -2.320180000 |
| 1  | -3.157118000 | -4.183934000 | -3.072046000 |
| 1  | -1.510684000 | -4.663029000 | -2.700421000 |
| 1  | -2.724574000 | -4.602537000 | -1.424627000 |
| 6  | -1.687635000 | -1.982382000 | -3.451485000 |
| 1  | -1.534586000 | -0.903062000 | -3.368509000 |
| 1  | -0.766886000 | -2.403753000 | -3.874973000 |
| 1  | -2.487108000 | -2.163454000 | -4.178756000 |
| 6  | -1.770338000 | 3.222247000  | -1.496388000 |
| 1  | -1.690360000 | 2.813054000  | -2.513909000 |
| 6  | -0.496332000 | 4.008469000  | -1.233358000 |
| 1  | 0.383070000  | 3.367588000  | -1.298031000 |
| 1  | -0.377177000 | 4.807938000  | -1.972285000 |
| 1  | -0.502224000 | 4.471630000  | -0.240517000 |
| 6  | -2.984962000 | 4.142980000  | -1.460425000 |
| 1  | -2.832769000 | 4.967033000  | -2.166787000 |
| 1  | -3.918262000 | 3.653372000  | -1.746855000 |
| 1  | -3.139868000 | 4.602928000  | -0.480325000 |
| 6  | 3.877041000  | -0.366193000 | -1.460435000 |
| 1  | 3.927774000  | -1.376283000 | -1.032955000 |
| 6  | 5.279960000  | 0.229335000  | -1.388681000 |
| 1  | 5.982334000  | -0.417829000 | -1.926010000 |
| 1  | 5.339832000  | 1.213360000  | -1.860869000 |
| 1  | 5.662416000  | 0.337238000  | -0.371334000 |
| 6  | 3.427042000  | -0.480886000 | -2.914012000 |
| 1  | 2.455976000  | -0.978198000 | -3.009966000 |
| 1  | 3.320635000  | 0.502903000  | -3.383579000 |
| 1  | 4.157545000  | -1.046610000 | -3.503368000 |

[4d''<sub>sc</sub>] (TE = -3335.065002)

|   |              |             |             |
|---|--------------|-------------|-------------|
| 6 | 0.003135000  | 1.606611000 | 1.128891000 |
| 6 | 0.708526000  | 2.168912000 | 2.207280000 |
| 1 | 1.382842000  | 1.532978000 | 2.777581000 |
| 6 | 0.567175000  | 3.500276000 | 2.579692000 |
| 1 | 1.135146000  | 3.886328000 | 3.424111000 |
| 6 | -0.299465000 | 4.335433000 | 1.881801000 |
| 1 | -0.416290000 | 5.378912000 | 2.164544000 |
| 6 | -0.983359000 | 3.827267000 | 0.784720000 |



|    |              |              |              |
|----|--------------|--------------|--------------|
| 1  | -1.615891000 | 4.477977000  | 0.183697000  |
| 6  | -0.826201000 | 2.492175000  | 0.409948000  |
| 6  | -0.979645000 | -0.640432000 | 1.544237000  |
| 6  | -1.458538000 | -0.233258000 | 2.801312000  |
| 1  | -1.098238000 | 0.704961000  | 3.218531000  |
| 6  | -2.364512000 | -0.988030000 | 3.536768000  |
| 1  | -2.703731000 | -0.626830000 | 4.505862000  |
| 6  | -2.830968000 | -2.201780000 | 3.042731000  |
| 1  | -3.539749000 | -2.799812000 | 3.610572000  |
| 6  | -2.413199000 | -2.619001000 | 1.785184000  |
| 1  | -2.816422000 | -3.530798000 | 1.348428000  |
| 6  | -1.516572000 | -1.846772000 | 1.045515000  |
| 6  | 1.456513000  | -0.416735000 | 1.140948000  |
| 6  | 1.736494000  | -0.970517000 | 2.402523000  |
| 1  | 0.932457000  | -1.033200000 | 3.133030000  |
| 6  | 2.995244000  | -1.442688000 | 2.752497000  |
| 1  | 3.156012000  | -1.863688000 | 3.743279000  |
| 6  | 4.042478000  | -1.386053000 | 1.839510000  |
| 1  | 5.027798000  | -1.768246000 | 2.095471000  |
| 6  | 3.800030000  | -0.872525000 | 0.572074000  |
| 1  | 4.584829000  | -0.883749000 | -0.180357000 |
| 6  | 2.533815000  | -0.390854000 | 0.228843000  |
| 16 | 2.220574000  | -0.013191000 | -1.494656000 |
| 16 | -1.495657000 | 1.974467000  | -1.164991000 |
| 16 | -1.253335000 | -2.273157000 | -0.670064000 |
| 23 | -0.258780000 | -0.151507000 | -1.464628000 |
| 6  | -3.342739000 | 1.804911000  | -0.896045000 |
| 1  | -3.689445000 | 2.841737000  | -0.799817000 |
| 6  | -0.184077000 | -3.812394000 | -0.648046000 |
| 1  | -0.863441000 | -4.604172000 | -0.307923000 |
| 6  | 2.990436000  | 1.670884000  | -1.810395000 |
| 1  | 2.835780000  | 1.739955000  | -2.894967000 |
| 6  | 4.473486000  | 1.648539000  | -1.506675000 |
| 1  | 4.936315000  | 2.583750000  | -1.839755000 |
| 1  | 4.657396000  | 1.565059000  | -0.431061000 |
| 1  | 4.989995000  | 0.824300000  | -2.005625000 |
| 6  | 2.270670000  | 2.800846000  | -1.114106000 |
| 1  | 2.327800000  | 2.704353000  | -0.025580000 |
| 1  | 2.729415000  | 3.759157000  | -1.383674000 |
| 1  | 1.215954000  | 2.847682000  | -1.392972000 |
| 6  | -3.891408000 | 1.182582000  | -2.163938000 |
| 1  | -3.623388000 | 1.748969000  | -3.059936000 |
| 1  | -3.512363000 | 0.163227000  | -2.294263000 |
| 1  | -4.983659000 | 1.131309000  | -2.113244000 |
| 6  | -3.695709000 | 1.017367000  | 0.341758000  |
| 1  | -3.236367000 | 1.428341000  | 1.244580000  |

|   |              |              |              |
|---|--------------|--------------|--------------|
| 1 | -4.781989000 | 1.025973000  | 0.487449000  |
| 1 | -3.382582000 | -0.026796000 | 0.251358000  |
| 6 | 0.215574000  | -4.052963000 | -2.090071000 |
| 1 | 0.773058000  | -4.990915000 | -2.176725000 |
| 1 | -0.647501000 | -4.112533000 | -2.759200000 |
| 1 | 0.863343000  | -3.246020000 | -2.452208000 |
| 6 | 1.002333000  | -3.703591000 | 0.277723000  |
| 1 | 1.700210000  | -2.932314000 | -0.060765000 |
| 1 | 0.709986000  | -3.463299000 | 1.303265000  |
| 1 | 1.545147000  | -4.655612000 | 0.300543000  |
| 6 | 0.085638000  | 0.131115000  | 0.786044000  |
| 7 | -1.284936000 | -0.549760000 | -4.313719000 |
| 7 | -0.740252000 | -0.372096000 | -3.219283000 |
| 1 | -0.580419000 | -0.535196000 | -5.085723000 |

[4e''<sub>ssi</sub>] (TE = -3586.475151)

|   |              |              |              |
|---|--------------|--------------|--------------|
| 6 | 1.239327000  | 1.275767000  | -1.655806000 |
| 6 | 1.374032000  | 1.553612000  | -3.022929000 |
| 1 | 0.779714000  | 0.991938000  | -3.744267000 |
| 6 | 2.244053000  | 2.533806000  | -3.490529000 |
| 1 | 2.324020000  | 2.728998000  | -4.558179000 |
| 6 | 3.007727000  | 3.270392000  | -2.589529000 |
| 1 | 3.684113000  | 4.044155000  | -2.946095000 |
| 6 | 2.883872000  | 3.036194000  | -1.224401000 |
| 1 | 3.451037000  | 3.633796000  | -0.512850000 |
| 6 | 2.008237000  | 2.049817000  | -0.770504000 |
| 6 | 1.034921000  | -1.709314000 | -1.098115000 |
| 6 | 1.604099000  | -2.154221000 | -2.299686000 |
| 1 | 1.549054000  | -1.517890000 | -3.184036000 |
| 6 | 2.250953000  | -3.381782000 | -2.397444000 |
| 1 | 2.684885000  | -3.697245000 | -3.344369000 |
| 6 | 2.353141000  | -4.203177000 | -1.277279000 |
| 1 | 2.865541000  | -5.160617000 | -1.342357000 |
| 6 | 1.821305000  | -3.784387000 | -0.063331000 |
| 1 | 1.928324000  | -4.404773000 | 0.824999000  |
| 6 | 1.168990000  | -2.553297000 | 0.014705000  |
| 6 | -1.542397000 | -0.218068000 | -1.730711000 |
| 6 | -1.735640000 | -0.629476000 | -3.057303000 |
| 1 | -0.868307000 | -0.819026000 | -3.690332000 |
| 6 | -3.005070000 | -0.827691000 | -3.589912000 |
| 1 | -3.119696000 | -1.148206000 | -4.623645000 |
| 6 | -4.128979000 | -0.639075000 | -2.790751000 |
| 1 | -5.124953000 | -0.812965000 | -3.192139000 |
| 6 | -3.975746000 | -0.250916000 | -1.464722000 |
| 1 | -4.846324000 | -0.137325000 | -0.822401000 |
| 6 | -2.696466000 | -0.026589000 | -0.950250000 |

|    |              |              |              |
|----|--------------|--------------|--------------|
| 16 | -2.567674000 | 0.433932000  | 0.797151000  |
| 16 | 1.834102000  | 1.839347000  | 1.019947000  |
| 16 | 0.570811000  | -2.009697000 | 1.633542000  |
| 23 | -0.175181000 | 0.415548000  | 1.586534000  |
| 6  | 3.508000000  | 1.127998000  | 1.454706000  |
| 1  | 4.215468000  | 1.928752000  | 1.204902000  |
| 6  | -0.838618000 | -3.206992000 | 1.913160000  |
| 1  | -0.346764000 | -4.181397000 | 2.025927000  |
| 6  | -2.938377000 | 2.268745000  | 0.758972000  |
| 1  | -2.791063000 | 2.515404000  | 1.817424000  |
| 6  | -4.373636000 | 2.526994000  | 0.350771000  |
| 1  | -4.612161000 | 3.586475000  | 0.493595000  |
| 1  | -4.539288000 | 2.301505000  | -0.707487000 |
| 1  | -5.085454000 | 1.942945000  | 0.939944000  |
| 6  | -1.944763000 | 3.033024000  | -0.089346000 |
| 1  | -1.952708000 | 2.691547000  | -1.130968000 |
| 1  | -2.201978000 | 4.097906000  | -0.092666000 |
| 1  | -0.925189000 | 2.936802000  | 0.292279000  |
| 6  | 3.501720000  | 0.886899000  | 2.950267000  |
| 1  | 3.266070000  | 1.791950000  | 3.516441000  |
| 1  | 2.764601000  | 0.122011000  | 3.220102000  |
| 1  | 4.482917000  | 0.529707000  | 3.278508000  |
| 6  | 3.825720000  | -0.119990000 | 0.662875000  |
| 1  | 3.758781000  | 0.038610000  | -0.417216000 |
| 1  | 4.844374000  | -0.456281000 | 0.886696000  |
| 1  | 3.146206000  | -0.936071000 | 0.924195000  |
| 6  | -1.502775000 | -2.808088000 | 3.214987000  |
| 1  | -2.294259000 | -3.520920000 | 3.466878000  |
| 1  | -0.798004000 | -2.780759000 | 4.050406000  |
| 1  | -1.965316000 | -1.817636000 | 3.133795000  |
| 6  | -1.802743000 | -3.241382000 | 0.748592000  |
| 1  | -2.313660000 | -2.282367000 | 0.627966000  |
| 1  | -1.310419000 | -3.480620000 | -0.197810000 |
| 1  | -2.571634000 | -4.001971000 | 0.924214000  |
| 14 | 0.133342000  | -0.039393000 | -0.840117000 |
| 7  | -1.145010000 | 2.378924000  | 3.703733000  |
| 7  | -0.633790000 | 1.467171000  | 3.036873000  |
| 1  | -0.905091000 | 2.274644000  | 4.716509000  |

[4f'<sub>SB</sub>] (TE = -3321.821651)

|   |              |             |              |
|---|--------------|-------------|--------------|
| 6 | 0.841400000  | 1.409932000 | -1.529554000 |
| 6 | 0.638549000  | 2.021916000 | -2.779302000 |
| 1 | -0.185131000 | 1.675439000 | -3.403667000 |
| 6 | 1.459125000  | 3.038744000 | -3.256306000 |
| 1 | 1.268413000  | 3.476002000 | -4.234691000 |
| 6 | 2.521924000  | 3.499735000 | -2.484428000 |

|    |              |              |              |
|----|--------------|--------------|--------------|
| 1  | 3.166523000  | 4.296982000  | -2.847330000 |
| 6  | 2.726904000  | 2.959903000  | -1.220096000 |
| 1  | 3.514406000  | 3.351092000  | -0.578127000 |
| 6  | 1.897887000  | 1.935988000  | -0.762218000 |
| 6  | 0.807807000  | -1.245762000 | -1.353385000 |
| 6  | 1.416964000  | -1.442957000 | -2.606784000 |
| 1  | 1.402728000  | -0.625416000 | -3.329094000 |
| 6  | 2.041952000  | -2.633725000 | -2.958590000 |
| 1  | 2.498308000  | -2.738313000 | -3.941221000 |
| 6  | 2.095100000  | -3.687490000 | -2.049847000 |
| 1  | 2.589139000  | -4.620713000 | -2.310986000 |
| 6  | 1.544544000  | -3.520029000 | -0.786142000 |
| 1  | 1.628011000  | -4.310956000 | -0.042290000 |
| 6  | 0.913076000  | -2.319441000 | -0.454810000 |
| 6  | -1.530714000 | 0.044697000  | -1.546963000 |
| 6  | -1.821450000 | -0.343202000 | -2.869392000 |
| 1  | -0.993373000 | -0.595149000 | -3.531949000 |
| 6  | -3.116929000 | -0.442704000 | -3.361154000 |
| 1  | -3.283818000 | -0.749049000 | -4.392180000 |
| 6  | -4.200088000 | -0.173782000 | -2.529480000 |
| 1  | -5.219761000 | -0.266081000 | -2.896148000 |
| 6  | -3.963517000 | 0.183460000  | -1.209836000 |
| 1  | -4.795512000 | 0.350814000  | -0.528992000 |
| 6  | -2.651522000 | 0.302866000  | -0.739476000 |
| 16 | -2.457902000 | 0.614608000  | 1.025093000  |
| 16 | 2.027306000  | 1.433675000  | 0.955871000  |
| 16 | 0.421149000  | -2.066553000 | 1.252226000  |
| 23 | -0.060740000 | 0.287139000  | 1.506460000  |
| 6  | 3.683366000  | 0.597628000  | 1.157705000  |
| 1  | 4.406077000  | 1.420169000  | 1.089325000  |
| 6  | -1.026545000 | -3.231996000 | 1.455425000  |
| 1  | -0.567030000 | -4.227564000 | 1.412895000  |
| 6  | -2.602144000 | 2.477376000  | 1.166807000  |
| 1  | -2.529784000 | 2.604113000  | 2.254093000  |
| 6  | -3.953422000 | 2.952396000  | 0.678039000  |
| 1  | -4.066445000 | 4.022105000  | 0.882631000  |
| 1  | -4.056449000 | 2.817255000  | -0.402819000 |
| 1  | -4.778994000 | 2.429241000  | 1.167009000  |
| 6  | -1.452590000 | 3.181207000  | 0.476299000  |
| 1  | -1.400332000 | 2.921201000  | -0.586034000 |
| 1  | -1.576715000 | 4.267534000  | 0.545146000  |
| 1  | -0.479571000 | 2.947023000  | 0.923909000  |
| 6  | 3.686764000  | 0.013264000  | 2.556098000  |
| 1  | 3.480746000  | 0.762677000  | 3.324423000  |
| 1  | 2.932123000  | -0.773883000 | 2.656771000  |
| 1  | 4.664884000  | -0.429233000 | 2.769317000  |

|   |              |              |              |
|---|--------------|--------------|--------------|
| 6 | 3.946441000  | -0.426055000 | 0.078583000  |
| 1 | 3.842674000  | -0.010081000 | -0.927375000 |
| 1 | 4.969261000  | -0.806464000 | 0.177671000  |
| 1 | 3.265732000  | -1.276954000 | 0.161359000  |
| 6 | -1.597112000 | -2.980558000 | 2.836097000  |
| 1 | -2.401168000 | -3.693488000 | 3.044759000  |
| 1 | -0.844125000 | -3.078982000 | 3.622318000  |
| 1 | -2.017065000 | -1.971210000 | 2.905453000  |
| 6 | -2.052329000 | -3.085092000 | 0.355160000  |
| 1 | -2.554041000 | -2.115458000 | 0.405637000  |
| 1 | -1.616096000 | -3.184239000 | -0.642637000 |
| 1 | -2.821950000 | -3.857967000 | 0.460297000  |
| 5 | 0.005995000  | 0.121359000  | -1.094025000 |
| 7 | 0.166084000  | 0.131627000  | 4.487441000  |
| 7 | -0.022242000 | 0.213176000  | 3.246895000  |
| 1 | -0.733297000 | 0.079722000  | 4.995413000  |

{[HIPTN<sub>3</sub>N]-V-N=NH} (TE = -3062.522570)

|    |              |              |              |
|----|--------------|--------------|--------------|
| 23 | 0.082595000  | 0.013557000  | 0.441073000  |
| 6  | 1.196589000  | 0.706964000  | 3.105226000  |
| 6  | 2.356270000  | 0.150477000  | 2.312225000  |
| 6  | -2.022208000 | 1.334333000  | 1.806695000  |
| 6  | -1.251754000 | 0.895691000  | 3.045717000  |
| 6  | -0.190959000 | -1.333014000 | 3.016890000  |
| 6  | -1.231262000 | -1.955077000 | 2.117710000  |
| 1  | -2.233392000 | -1.589938000 | 2.402474000  |
| 1  | -1.256651000 | -3.043226000 | 2.271555000  |
| 1  | 0.778387000  | -1.809929000 | 2.841856000  |
| 1  | -0.440403000 | -1.454732000 | 4.082140000  |
| 1  | -2.595266000 | 2.242325000  | 2.041551000  |
| 1  | -2.765555000 | 0.570209000  | 1.520030000  |
| 1  | -0.897226000 | 1.774307000  | 3.591856000  |
| 1  | -1.884034000 | 0.327861000  | 3.738236000  |
| 1  | 1.102120000  | 1.777268000  | 2.898189000  |
| 1  | 1.339200000  | 0.585485000  | 4.190293000  |
| 1  | 2.690928000  | -0.822555000 | 2.712440000  |
| 1  | 3.216769000  | 0.823028000  | 2.431120000  |
| 7  | -0.913469000 | -1.635554000 | 0.726353000  |
| 7  | -0.065842000 | 0.089239000  | 2.655552000  |
| 7  | -1.061397000 | 1.578284000  | 0.740504000  |
| 7  | 1.952892000  | 0.008231000  | 0.921152000  |
| 6  | -1.585959000 | -2.422108000 | -0.219447000 |
| 6  | -1.040005000 | -2.636231000 | -1.497697000 |
| 6  | -2.816378000 | -3.043307000 | 0.070566000  |
| 6  | -1.702941000 | -3.404413000 | -2.441632000 |
| 1  | -0.078174000 | -2.196024000 | -1.739557000 |

|   |              |              |              |
|---|--------------|--------------|--------------|
| 6 | -3.473721000 | -3.813429000 | -0.882451000 |
| 1 | -3.278178000 | -2.909536000 | 1.044803000  |
| 6 | -2.928768000 | -3.999238000 | -2.147358000 |
| 1 | -1.247357000 | -3.549072000 | -3.419285000 |
| 1 | -4.428555000 | -4.269753000 | -0.627187000 |
| 1 | -3.444288000 | -4.603330000 | -2.889831000 |
| 6 | -1.375758000 | 2.538691000  | -0.211086000 |
| 6 | -2.685522000 | 2.986948000  | -0.464655000 |
| 6 | -0.333758000 | 3.110437000  | -0.970314000 |
| 6 | -2.933768000 | 3.942561000  | -1.444602000 |
| 1 | -3.520201000 | 2.559952000  | 0.085580000  |
| 6 | -0.592326000 | 4.055105000  | -1.950924000 |
| 1 | 0.689220000  | 2.800693000  | -0.754429000 |
| 6 | -1.897693000 | 4.481545000  | -2.199480000 |
| 1 | -3.959099000 | 4.260136000  | -1.625993000 |
| 1 | 0.236504000  | 4.480496000  | -2.514359000 |
| 1 | -2.099671000 | 5.227212000  | -2.964126000 |
| 6 | 3.001096000  | -0.183617000 | 0.000540000  |
| 6 | 4.116712000  | 0.667855000  | -0.040441000 |
| 6 | 2.934473000  | -1.228794000 | -0.932206000 |
| 6 | 5.113188000  | 0.488381000  | -0.991071000 |
| 1 | 4.186481000  | 1.496812000  | 0.661031000  |
| 6 | 3.927710000  | -1.398124000 | -1.888034000 |
| 1 | 2.085136000  | -1.908710000 | -0.890057000 |
| 6 | 5.024907000  | -0.542205000 | -1.923735000 |
| 1 | 5.961871000  | 1.169533000  | -1.011234000 |
| 1 | 3.848363000  | -2.214351000 | -2.603110000 |
| 1 | 5.805256000  | -0.678096000 | -2.668619000 |
| 7 | 0.238062000  | 0.331173000  | -2.538522000 |
| 7 | 0.201960000  | 0.173209000  | -1.330912000 |
| 1 | 0.161325000  | 1.341840000  | -2.791593000 |

Cartesian coordinates of  $[4a'_{PC}]-[4f'_{SB}]$  and  $[4a''_{PC}]-[4f''_{SB}]$  along with their total energies (in hartree) including zero point vibrational correction at M06-D3(heptane)/def2-SVP level of theory.

$[4a'_{PC}]$  (TE = -3060.454573)

|   |              |              |             |
|---|--------------|--------------|-------------|
| 6 | -0.620139000 | 2.271571000  | 1.950387000 |
| 6 | 0.186158000  | 1.192720000  | 2.669544000 |
| 6 | -2.392041000 | -0.718069000 | 2.064011000 |
| 6 | -1.018585000 | -1.019481000 | 2.650402000 |
| 6 | 2.703726000  | -0.551354000 | 1.814052000 |
| 6 | 1.429727000  | -0.941165000 | 2.550921000 |
| 1 | -2.692432000 | 0.329600000  | 2.246022000 |

|    |              |              |              |
|----|--------------|--------------|--------------|
| 1  | -1.065986000 | -0.901272000 | 3.760505000  |
| 1  | 3.598254000  | -1.054893000 | 2.218982000  |
| 1  | 1.581157000  | -0.788494000 | 3.647702000  |
| 1  | -0.500727000 | 3.265547000  | 2.419032000  |
| 1  | 1.235242000  | 1.551145000  | 2.708285000  |
| 6  | -1.199741000 | 3.442248000  | -0.761412000 |
| 1  | -0.580368000 | 4.345427000  | -0.919429000 |
| 6  | -2.575473000 | -2.787949000 | 0.037461000  |
| 1  | -1.881387000 | -3.189431000 | 0.804595000  |
| 6  | 3.806596000  | 0.047546000  | -0.833503000 |
| 1  | 3.606163000  | 1.094654000  | -0.528550000 |
| 23 | 0.046815000  | -0.209780000 | -0.288836000 |
| 6  | 0.159352000  | -0.228068000 | 2.062686000  |
| 1  | -1.699988000 | 2.045878000  | 1.968141000  |
| 1  | -0.129999000 | 1.162932000  | 3.739338000  |
| 1  | 1.295170000  | -2.036029000 | 2.434419000  |
| 1  | 2.896003000  | 0.536438000  | 1.894464000  |
| 1  | -0.824354000 | -2.100787000 | 2.492767000  |
| 1  | -3.183315000 | -1.350800000 | 2.507555000  |
| 6  | 5.211830000  | -0.325031000 | -0.392210000 |
| 1  | 5.956575000  | 0.320593000  | -0.889642000 |
| 1  | 5.356679000  | -0.216111000 | 0.695061000  |
| 1  | 5.460205000  | -1.365495000 | -0.665537000 |
| 6  | 3.638759000  | -0.042848000 | -2.343101000 |
| 1  | 3.827766000  | -1.067596000 | -2.710481000 |
| 1  | 2.620418000  | 0.234473000  | -2.662564000 |
| 1  | 4.355900000  | 0.619712000  | -2.857801000 |
| 6  | -3.975714000 | -3.285635000 | 0.355764000  |
| 1  | -3.988937000 | -4.388864000 | 0.391780000  |
| 1  | -4.351156000 | -2.922166000 | 1.326257000  |
| 1  | -4.696640000 | -2.983931000 | -0.423086000 |
| 6  | -2.093082000 | -3.285906000 | -1.317283000 |
| 1  | -2.723800000 | -2.907679000 | -2.140405000 |
| 1  | -1.060280000 | -2.953124000 | -1.507283000 |
| 1  | -2.121515000 | -4.388307000 | -1.360459000 |
| 6  | -1.549787000 | 2.855559000  | -2.122349000 |
| 1  | -0.656391000 | 2.563282000  | -2.697481000 |
| 1  | -2.159524000 | 1.941988000  | -2.013651000 |
| 1  | -2.125780000 | 3.578456000  | -2.725515000 |
| 6  | -2.443459000 | 3.866613000  | 0.003127000  |
| 1  | -2.202512000 | 4.380283000  | 0.947430000  |
| 1  | -3.047798000 | 4.558640000  | -0.608178000 |

|    |              |              |              |
|----|--------------|--------------|--------------|
| 1  | -3.092861000 | 3.007039000  | 0.247598000  |
| 6  | 2.885043000  | -2.687522000 | -0.272426000 |
| 1  | 3.530539000  | -2.655866000 | -1.171614000 |
| 6  | 1.641973000  | -3.491966000 | -0.620876000 |
| 1  | 0.903952000  | -3.462122000 | 0.203064000  |
| 1  | 1.140871000  | -3.087511000 | -1.514878000 |
| 1  | 1.896612000  | -4.549212000 | -0.811805000 |
| 6  | 3.667956000  | -3.342331000 | 0.854448000  |
| 1  | 3.934494000  | -4.377469000 | 0.579213000  |
| 1  | 4.604673000  | -2.813856000 | 1.090958000  |
| 1  | 3.071256000  | -3.399521000 | 1.781152000  |
| 6  | -3.712061000 | -0.005079000 | -0.471664000 |
| 1  | -3.323186000 | 1.028557000  | -0.363851000 |
| 6  | -5.040140000 | -0.075269000 | 0.265290000  |
| 1  | -5.522484000 | -1.059374000 | 0.159840000  |
| 1  | -4.938661000 | 0.136027000  | 1.341880000  |
| 1  | -5.739036000 | 0.672378000  | -0.149397000 |
| 6  | -3.864805000 | -0.281530000 | -1.960604000 |
| 1  | -4.324169000 | -1.269230000 | -2.139808000 |
| 1  | -4.521055000 | 0.470328000  | -2.431932000 |
| 1  | -2.894888000 | -0.261877000 | -2.487122000 |
| 6  | 1.547828000  | 3.110094000  | 0.170863000  |
| 1  | 2.209502000  | 2.394044000  | 0.698253000  |
| 6  | 1.582262000  | 4.436713000  | 0.908398000  |
| 1  | 2.577079000  | 4.905948000  | 0.814337000  |
| 1  | 0.849242000  | 5.155302000  | 0.499684000  |
| 1  | 1.376664000  | 4.323568000  | 1.984755000  |
| 6  | 2.040075000  | 3.230494000  | -1.264279000 |
| 1  | 3.095358000  | 3.553417000  | -1.294519000 |
| 1  | 1.960023000  | 2.268049000  | -1.799066000 |
| 1  | 1.458737000  | 3.977210000  | -1.833050000 |
| 15 | -2.262600000 | -0.950151000 | 0.236693000  |
| 15 | -0.107915000 | 2.231437000  | 0.178915000  |
| 15 | 2.425403000  | -0.877182000 | 0.017968000  |
| 7  | -0.023670000 | -0.881081000 | -3.269135000 |
| 7  | 0.005788000  | -0.620042000 | -2.063000000 |
| 1  | -0.221725000 | -1.904814000 | -3.417298000 |

[4b'<sub>psi</sub>] (TE = -3311.841504)

|   |              |             |             |
|---|--------------|-------------|-------------|
| 6 | 0.219161000  | 2.693326000 | 1.945495000 |
| 6 | 0.610939000  | 1.570960000 | 2.901101000 |
| 6 | -2.732295000 | 0.132001000 | 2.020981000 |



|    |              |              |              |
|----|--------------|--------------|--------------|
| 6  | -1.671954000 | -0.529431000 | 2.894960000  |
| 6  | 2.441482000  | -1.640813000 | 1.807169000  |
| 6  | 1.315276000  | -1.455554000 | 2.821121000  |
| 1  | -2.683281000 | 1.233989000  | 2.124919000  |
| 1  | -1.783606000 | -0.215351000 | 3.949892000  |
| 1  | 3.055177000  | -2.543717000 | 1.992602000  |
| 1  | 1.732621000  | -1.197605000 | 3.812447000  |
| 1  | 0.602055000  | 3.693079000  | 2.228864000  |
| 1  | 1.709751000  | 1.549778000  | 3.045210000  |
| 6  | 0.185168000  | 3.708450000  | -0.823306000 |
| 1  | 0.896474000  | 4.536325000  | -0.631899000 |
| 6  | -2.899196000 | -1.984351000 | -0.016003000 |
| 1  | -1.970684000 | -2.487536000 | 0.323552000  |
| 6  | 3.491829000  | -1.327910000 | -0.846254000 |
| 1  | 3.735667000  | -0.303410000 | -0.498201000 |
| 23 | 0.000084000  | -0.026835000 | -0.424938000 |
| 1  | -0.882160000 | 2.783620000  | 1.908220000  |
| 1  | 0.176951000  | 1.742876000  | 3.904290000  |
| 1  | 0.760678000  | -2.401190000 | 2.958882000  |
| 1  | 3.140247000  | -0.781517000 | 1.863905000  |
| 1  | -1.802151000 | -1.630136000 | 2.884765000  |
| 1  | -3.767576000 | -0.153327000 | 2.286574000  |
| 6  | 4.633915000  | -2.249550000 | -0.448978000 |
| 1  | 5.560577000  | -1.951227000 | -0.969842000 |
| 1  | 4.846835000  | -2.231029000 | 0.631053000  |
| 1  | 4.433804000  | -3.296319000 | -0.737064000 |
| 6  | 3.325397000  | -1.278697000 | -2.356781000 |
| 1  | 3.183120000  | -2.289802000 | -2.776861000 |
| 1  | 2.458575000  | -0.667648000 | -2.659407000 |
| 1  | 4.227882000  | -0.856800000 | -2.832479000 |
| 6  | -4.052986000 | -2.509836000 | 0.822451000  |
| 1  | -4.169753000 | -3.594744000 | 0.654031000  |
| 1  | -3.894368000 | -2.366383000 | 1.903120000  |
| 1  | -5.012019000 | -2.037122000 | 0.556370000  |
| 6  | -3.073227000 | -2.311384000 | -1.492611000 |
| 1  | -4.022587000 | -1.907692000 | -1.885963000 |
| 1  | -2.250661000 | -1.910970000 | -2.109195000 |
| 1  | -3.103425000 | -3.404854000 | -1.640255000 |
| 6  | 0.204816000  | 3.351331000  | -2.304626000 |
| 1  | 1.187476000  | 3.004258000  | -2.657541000 |
| 1  | -0.512092000 | 2.537362000  | -2.509807000 |
| 1  | -0.084526000 | 4.224090000  | -2.914825000 |
| 6  | -1.213835000 | 4.153869000  | -0.422481000 |
| 1  | -1.255112000 | 4.591982000  | 0.586370000  |
| 1  | -1.595791000 | 4.909843000  | -1.129302000 |
| 1  | -1.915163000 | 3.298248000  | -0.451569000 |

|    |              |              |              |
|----|--------------|--------------|--------------|
| 6  | 1.461301000  | -3.419232000 | -0.352263000 |
| 1  | 2.434734000  | -3.930943000 | -0.484910000 |
| 6  | 0.652785000  | -3.513244000 | -1.637609000 |
| 1  | -0.310267000 | -2.986332000 | -1.517987000 |
| 1  | 1.150900000  | -3.050262000 | -2.502746000 |
| 1  | 0.444536000  | -4.567891000 | -1.887479000 |
| 6  | 0.712864000  | -4.098431000 | 0.784108000  |
| 1  | 0.436797000  | -5.126744000 | 0.494068000  |
| 1  | 1.302453000  | -4.163560000 | 1.711687000  |
| 1  | -0.226574000 | -3.563299000 | 1.016963000  |
| 6  | -3.703379000 | 0.907198000  | -0.582272000 |
| 1  | -3.498767000 | 1.866099000  | -0.060574000 |
| 6  | -5.157287000 | 0.540870000  | -0.328167000 |
| 1  | -5.437348000 | -0.386132000 | -0.856730000 |
| 1  | -5.385768000 | 0.405253000  | 0.741131000  |
| 1  | -5.821578000 | 1.336952000  | -0.707408000 |
| 6  | -3.433056000 | 1.128869000  | -2.062900000 |
| 1  | -3.602711000 | 0.214011000  | -2.654449000 |
| 1  | -4.099249000 | 1.912272000  | -2.463826000 |
| 1  | -2.390322000 | 1.436873000  | -2.240946000 |
| 6  | 2.603550000  | 2.419509000  | 0.307898000  |
| 1  | 2.889153000  | 1.516250000  | 0.884596000  |
| 6  | 3.108364000  | 3.646703000  | 1.047435000  |
| 1  | 4.211851000  | 3.673313000  | 1.033768000  |
| 1  | 2.760475000  | 4.581880000  | 0.573807000  |
| 1  | 2.795212000  | 3.666060000  | 2.102914000  |
| 6  | 3.234235000  | 2.306853000  | -1.072451000 |
| 1  | 4.323467000  | 2.145651000  | -0.990718000 |
| 1  | 2.808553000  | 1.469359000  | -1.652274000 |
| 1  | 3.090204000  | 3.232919000  | -1.655568000 |
| 15 | -2.401558000 | -0.186038000 | 0.218060000  |
| 15 | 0.733733000  | 2.242901000  | 0.217947000  |
| 15 | 1.854002000  | -1.620723000 | 0.032727000  |
| 14 | 0.071244000  | -0.143945000 | 2.169328000  |
| 7  | -0.394902000 | -0.513850000 | -3.403613000 |
| 7  | -0.185621000 | -0.234111000 | -2.217568000 |
| 1  | -0.190234000 | 0.318238000  | -4.010010000 |

[4c'<sub>PB</sub>] (TE = -3047.245892)

|   |              |              |             |
|---|--------------|--------------|-------------|
| 6 | -0.449215000 | 2.350603000  | 2.132032000 |
| 6 | 0.372869000  | 1.311740000  | 2.885113000 |
| 6 | -2.470023000 | -0.535407000 | 2.030598000 |
| 6 | -1.241170000 | -0.933298000 | 2.843373000 |
| 6 | 2.670569000  | -0.758717000 | 1.792763000 |
| 6 | 1.468364000  | -1.167059000 | 2.635409000 |

|    |              |              |              |
|----|--------------|--------------|--------------|
| 1  | -2.667700000 | 0.550150000  | 2.095069000  |
| 1  | -1.452117000 | -0.724308000 | 3.915113000  |
| 1  | 3.584362000  | -1.326770000 | 2.042536000  |
| 1  | 1.767602000  | -1.150524000 | 3.707454000  |
| 1  | -0.315689000 | 3.377208000  | 2.522469000  |
| 1  | 1.443750000  | 1.591943000  | 2.831622000  |
| 6  | -1.159357000 | 3.569011000  | -0.471007000 |
| 1  | -0.597095000 | 4.522642000  | -0.447754000 |
| 6  | -2.274499000 | -2.759048000 | 0.151671000  |
| 1  | -1.268838000 | -3.014410000 | 0.539926000  |
| 6  | 3.691933000  | -0.008832000 | -0.834198000 |
| 1  | 3.565574000  | 1.021273000  | -0.442928000 |
| 23 | -0.004850000 | -0.055427000 | -0.572214000 |
| 1  | -1.525940000 | 2.129812000  | 2.218026000  |
| 1  | 0.121804000  | 1.388284000  | 3.965726000  |
| 1  | 1.214165000  | -2.226209000 | 2.430096000  |
| 1  | 2.919680000  | 0.308501000  | 1.953784000  |
| 1  | -1.127893000 | -2.034976000 | 2.791301000  |
| 1  | -3.390456000 | -1.031828000 | 2.390564000  |
| 6  | 5.090224000  | -0.485354000 | -0.476497000 |
| 1  | 5.845586000  | 0.194140000  | -0.908348000 |
| 1  | 5.266286000  | -0.522365000 | 0.610719000  |
| 1  | 5.292874000  | -1.487908000 | -0.890865000 |
| 6  | 3.493388000  | 0.036966000  | -2.341817000 |
| 1  | 3.600871000  | -0.964246000 | -2.796234000 |
| 1  | 2.491487000  | 0.409250000  | -2.611777000 |
| 1  | 4.247600000  | 0.690395000  | -2.813712000 |
| 6  | -3.305039000 | -3.456321000 | 1.024790000  |
| 1  | -3.184986000 | -4.550445000 | 0.937987000  |
| 1  | -3.200694000 | -3.204713000 | 2.092092000  |
| 1  | -4.337902000 | -3.220787000 | 0.721384000  |
| 6  | -2.339699000 | -3.236979000 | -1.292250000 |
| 1  | -3.359493000 | -3.132505000 | -1.702346000 |
| 1  | -1.650172000 | -2.681929000 | -1.951140000 |
| 1  | -2.077611000 | -4.307500000 | -1.354155000 |
| 6  | -1.433617000 | 3.186571000  | -1.918730000 |
| 1  | -0.513510000 | 3.007528000  | -2.497834000 |
| 1  | -2.021056000 | 2.252011000  | -1.961203000 |
| 1  | -2.012144000 | 3.975155000  | -2.430208000 |
| 6  | -2.466871000 | 3.768345000  | 0.279214000  |
| 1  | -2.324634000 | 4.173661000  | 1.292539000  |
| 1  | -3.118681000 | 4.468728000  | -0.270351000 |
| 1  | -3.024725000 | 2.818079000  | 0.371185000  |
| 6  | 2.557533000  | -2.707748000 | -0.450675000 |
| 1  | 2.979499000  | -2.644447000 | -1.473687000 |
| 6  | 1.243267000  | -3.467137000 | -0.540583000 |

|    |              |              |              |
|----|--------------|--------------|--------------|
| 1  | 0.778197000  | -3.565218000 | 0.458219000  |
| 1  | 0.525449000  | -2.957810000 | -1.203129000 |
| 1  | 1.410730000  | -4.488541000 | -0.924621000 |
| 6  | 3.537936000  | -3.447650000 | 0.447022000  |
| 1  | 3.706927000  | -4.467668000 | 0.060559000  |
| 1  | 4.520056000  | -2.958021000 | 0.525075000  |
| 1  | 3.135342000  | -3.555716000 | 1.469224000  |
| 6  | -3.711077000 | -0.157794000 | -0.571138000 |
| 1  | -3.612936000 | 0.893521000  | -0.225937000 |
| 6  | -5.061440000 | -0.683485000 | -0.112105000 |
| 1  | -5.244071000 | -1.703084000 | -0.491880000 |
| 1  | -5.165404000 | -0.705801000 | 0.984692000  |
| 1  | -5.872794000 | -0.047401000 | -0.507070000 |
| 6  | -3.605294000 | -0.145318000 | -2.089997000 |
| 1  | -3.782627000 | -1.145710000 | -2.517635000 |
| 1  | -4.359057000 | 0.534531000  | -2.523697000 |
| 1  | -2.607696000 | 0.180276000  | -2.429309000 |
| 6  | 1.641696000  | 3.088506000  | 0.254016000  |
| 1  | 2.297384000  | 2.306804000  | 0.687101000  |
| 6  | 1.796805000  | 4.356411000  | 1.075429000  |
| 1  | 2.805077000  | 4.782532000  | 0.933307000  |
| 1  | 1.075019000  | 5.136064000  | 0.773008000  |
| 1  | 1.668443000  | 4.179906000  | 2.154798000  |
| 6  | 2.059423000  | 3.298950000  | -1.193574000 |
| 1  | 3.127052000  | 3.573095000  | -1.257561000 |
| 1  | 1.906030000  | 2.388275000  | -1.798232000 |
| 1  | 1.487590000  | 4.117722000  | -1.664608000 |
| 15 | -2.186368000 | -0.888989000 | 0.238229000  |
| 15 | -0.049679000 | 2.272894000  | 0.327017000  |
| 15 | 2.262901000  | -0.899473000 | -0.007019000 |
| 5  | 0.169591000  | -0.239589000 | 2.518142000  |
| 7  | 0.032756000  | -1.116490000 | -3.416563000 |
| 7  | 0.000071000  | -0.531691000 | -2.324641000 |
| 1  | 0.109526000  | -0.419285000 | -4.195798000 |

[4d'<sub>sc</sub>] (TE = -2876.104036)

|   |              |              |             |
|---|--------------|--------------|-------------|
| 6 | 0.177528000  | 2.267784000  | 1.547949000 |
| 6 | 0.295833000  | 1.088256000  | 2.508267000 |
| 6 | -2.576415000 | 0.267648000  | 1.805262000 |
| 6 | -1.520999000 | -0.653549000 | 2.373071000 |
| 6 | 2.227300000  | -1.358181000 | 1.895590000 |
| 6 | 0.845333000  | -1.355023000 | 2.523527000 |
| 1 | -2.425241000 | 1.310660000  | 2.131835000 |
| 1 | -1.639601000 | -0.648124000 | 3.486581000 |
| 1 | 2.897080000  | -2.107818000 | 2.349886000 |

|    |              |              |              |
|----|--------------|--------------|--------------|
| 1  | 0.975963000  | -1.254905000 | 3.628844000  |
| 1  | 0.585356000  | 3.195708000  | 1.984932000  |
| 1  | 1.351825000  | 1.067024000  | 2.844614000  |
| 6  | 0.695290000  | 3.079977000  | -1.210416000 |
| 1  | 1.473398000  | 2.881442000  | -1.971459000 |
| 6  | -3.399854000 | -1.167761000 | -0.595862000 |
| 1  | -2.679953000 | -1.997154000 | -0.481899000 |
| 6  | 3.476097000  | -0.847837000 | -0.631184000 |
| 1  | 3.464639000  | 0.166161000  | -0.189497000 |
| 23 | -0.064840000 | -0.415327000 | -0.288573000 |
| 16 | -2.507703000 | 0.361806000  | -0.026345000 |
| 16 | 1.144016000  | 1.813457000  | 0.059719000  |
| 16 | 2.029119000  | -1.724822000 | 0.108821000  |
| 6  | -0.098181000 | -0.295350000 | 1.953588000  |
| 1  | -0.864222000 | 2.464360000  | 1.238764000  |
| 1  | -0.280101000 | 1.344202000  | 3.428082000  |
| 1  | 0.400749000  | -2.359967000 | 2.377418000  |
| 1  | 2.717171000  | -0.370158000 | 1.975902000  |
| 1  | -1.750098000 | -1.692349000 | 2.055739000  |
| 1  | -3.603786000 | 0.004064000  | 2.102912000  |
| 6  | 4.766509000  | -1.561033000 | -0.288563000 |
| 1  | 5.628150000  | -1.023219000 | -0.719965000 |
| 1  | 4.926674000  | -1.627470000 | 0.799351000  |
| 1  | 4.765085000  | -2.586042000 | -0.696370000 |
| 6  | 3.232981000  | -0.755849000 | -2.124179000 |
| 1  | 3.140865000  | -1.761426000 | -2.571426000 |
| 1  | 2.304118000  | -0.204924000 | -2.348303000 |
| 1  | 4.076229000  | -0.243983000 | -2.616916000 |
| 6  | -4.662975000 | -1.436706000 | 0.188989000  |
| 1  | -5.209422000 | -2.271899000 | -0.280627000 |
| 1  | -4.466347000 | -1.727371000 | 1.232374000  |
| 1  | -5.329804000 | -0.556543000 | 0.188660000  |
| 6  | -3.685207000 | -0.939376000 | -2.067442000 |
| 1  | -4.447616000 | -0.152294000 | -2.199046000 |
| 1  | -2.778322000 | -0.643156000 | -2.616747000 |
| 1  | -4.060496000 | -1.869331000 | -2.525654000 |
| 6  | -0.667369000 | 2.842039000  | -1.823595000 |
| 1  | -0.753823000 | 1.818926000  | -2.227639000 |
| 1  | -1.476279000 | 2.981989000  | -1.086129000 |
| 1  | -0.841836000 | 3.556963000  | -2.645808000 |
| 6  | 0.870182000  | 4.485367000  | -0.673122000 |
| 1  | 1.860558000  | 4.629565000  | -0.213504000 |
| 1  | 0.759291000  | 5.219745000  | -1.488420000 |
| 1  | 0.101638000  | 4.720959000  | 0.082411000  |
| 7  | -0.656098000 | -2.449310000 | -2.482678000 |
| 7  | -0.406867000 | -1.504769000 | -1.729676000 |

1 -0.393002000 -2.202047000 -3.471644000

[4e' ssi] (TE = -3127.468242)

|    |              |              |              |
|----|--------------|--------------|--------------|
| 6  | 0.506686000  | 0.232234000  | -2.684047000 |
| 6  | 0.172701000  | -1.253083000 | -2.694996000 |
| 6  | 2.718401000  | -2.171869000 | -0.385046000 |
| 6  | 1.550691000  | -3.105909000 | -0.649792000 |
| 6  | -2.749834000 | -1.910165000 | -0.531434000 |
| 6  | -1.651127000 | -2.926905000 | -0.798473000 |
| 1  | 2.942347000  | -1.570335000 | -1.285142000 |
| 1  | 1.782676000  | -3.746214000 | -1.520873000 |
| 1  | -3.732973000 | -2.375639000 | -0.345296000 |
| 1  | -1.906882000 | -3.500399000 | -1.708998000 |
| 1  | 0.349630000  | 0.720709000  | -3.661514000 |
| 1  | -0.786856000 | -1.407921000 | -3.225122000 |
| 6  | -0.195356000 | 2.833298000  | -1.534922000 |
| 1  | -0.990806000 | 3.243283000  | -0.884565000 |
| 6  | 3.792868000  | 0.042471000  | 1.065584000  |
| 1  | 4.615605000  | -0.656559000 | 1.307606000  |
| 6  | -3.555539000 | 0.513869000  | 0.698014000  |
| 1  | -3.403865000 | 0.840303000  | -0.348820000 |
| 23 | 0.007141000  | -0.015910000 | 0.760763000  |
| 16 | 2.278051000  | -1.020925000 | 0.989049000  |
| 16 | -0.604282000 | 1.030689000  | -1.448780000 |
| 16 | -2.349296000 | -0.870663000 | 0.947425000  |
| 1  | 1.551075000  | 0.414339000  | -2.368750000 |
| 1  | 0.940825000  | -1.795969000 | -3.277467000 |
| 1  | -1.600463000 | -3.653959000 | 0.033881000  |
| 1  | -2.860635000 | -1.210014000 | -1.381447000 |
| 1  | 1.390797000  | -3.772418000 | 0.217676000  |
| 1  | 3.649981000  | -2.683214000 | -0.081618000 |
| 6  | -4.978947000 | 0.041286000  | 0.906646000  |
| 1  | -5.683553000 | 0.875894000  | 0.749564000  |
| 1  | -5.262744000 | -0.764364000 | 0.211842000  |
| 1  | -5.116694000 | -0.329774000 | 1.936359000  |
| 6  | -3.175974000 | 1.637737000  | 1.639879000  |
| 1  | -3.220686000 | 1.306462000  | 2.692293000  |
| 1  | -2.152218000 | 2.000676000  | 1.451655000  |
| 1  | -3.877115000 | 2.480604000  | 1.522775000  |
| 6  | 4.068940000  | 0.751309000  | -0.241388000 |
| 1  | 4.920943000  | 1.443449000  | -0.130587000 |
| 1  | 4.312550000  | 0.059392000  | -1.062478000 |
| 1  | 3.185516000  | 1.342590000  | -0.535841000 |
| 6  | 3.585457000  | 1.016401000  | 2.206942000  |
| 1  | 2.735498000  | 1.688370000  | 1.995535000  |

|    |              |              |              |
|----|--------------|--------------|--------------|
| 1  | 3.367826000  | 0.499698000  | 3.155109000  |
| 1  | 4.486695000  | 1.634983000  | 2.348800000  |
| 6  | 1.151429000  | 3.146905000  | -0.925369000 |
| 1  | 1.225136000  | 2.735649000  | 0.096176000  |
| 1  | 1.968873000  | 2.728213000  | -1.538370000 |
| 1  | 1.307710000  | 4.237758000  | -0.872789000 |
| 6  | -0.360977000 | 3.383547000  | -2.936461000 |
| 1  | -1.333565000 | 3.108624000  | -3.373717000 |
| 1  | -0.289918000 | 4.484154000  | -2.922448000 |
| 1  | 0.435088000  | 3.017634000  | -3.606921000 |
| 14 | 0.015116000  | -1.983494000 | -0.894410000 |
| 7  | 0.186268000  | 1.467032000  | 3.435820000  |
| 7  | 0.110449000  | 0.866887000  | 2.362263000  |
| 1  | 0.129225000  | 0.789034000  | 4.237178000  |

[4f<sub>SB</sub>] (TE = -2862.882797)

|    |              |              |              |
|----|--------------|--------------|--------------|
| 6  | 0.498650000  | 2.412184000  | 1.609582000  |
| 6  | 0.407287000  | 1.293918000  | 2.634230000  |
| 6  | -2.733924000 | 0.878552000  | 1.353037000  |
| 6  | -2.003148000 | 0.001291000  | 2.345885000  |
| 6  | 1.665441000  | -1.695542000 | 2.108713000  |
| 6  | 0.283988000  | -1.438740000 | 2.674091000  |
| 1  | -2.356025000 | 1.916265000  | 1.359588000  |
| 1  | -2.258518000 | 0.377710000  | 3.361713000  |
| 1  | 2.156769000  | -2.585019000 | 2.539726000  |
| 1  | 0.378268000  | -1.447098000 | 3.783223000  |
| 1  | 1.080343000  | 3.278327000  | 1.971063000  |
| 1  | 1.439746000  | 1.048562000  | 2.954990000  |
| 6  | 1.073579000  | 3.045130000  | -1.162366000 |
| 1  | 1.696585000  | 2.646024000  | -1.984842000 |
| 6  | -3.247499000 | -1.345389000 | -0.401186000 |
| 1  | -2.518714000 | -1.993183000 | 0.124024000  |
| 6  | 3.245324000  | -1.448443000 | -0.241783000 |
| 1  | 3.414479000  | -0.460115000 | 0.226752000  |
| 23 | -0.065087000 | -0.234288000 | -0.515112000 |
| 16 | -2.494316000 | 0.359327000  | -0.392338000 |
| 16 | 1.334439000  | 1.737051000  | 0.122240000  |
| 16 | 1.541531000  | -1.948007000 | 0.290866000  |
| 1  | -0.496687000 | 2.776472000  | 1.300284000  |
| 1  | -0.076341000 | 1.723483000  | 3.537491000  |
| 1  | -0.370951000 | -2.301037000 | 2.437104000  |
| 1  | 2.336583000  | -0.829752000 | 2.263050000  |
| 1  | -2.428572000 | -1.020293000 | 2.309052000  |
| 1  | -3.822208000 | 0.950256000  | 1.525663000  |
| 6  | 4.269228000  | -2.451708000 | 0.245342000  |

|   |              |              |              |
|---|--------------|--------------|--------------|
| 1 | 5.282191000  | -2.140166000 | -0.061954000 |
| 1 | 4.272691000  | -2.550727000 | 1.342014000  |
| 1 | 4.073497000  | -3.447118000 | -0.188113000 |
| 6 | 3.250088000  | -1.302893000 | -1.749476000 |
| 1 | 2.953614000  | -2.246879000 | -2.240122000 |
| 1 | 2.551107000  | -0.518371000 | -2.082498000 |
| 1 | 4.263684000  | -1.044432000 | -2.098167000 |
| 6 | -4.590811000 | -1.363257000 | 0.295405000  |
| 1 | -5.046114000 | -2.361542000 | 0.183749000  |
| 1 | -4.524296000 | -1.153390000 | 1.373542000  |
| 1 | -5.277478000 | -0.629461000 | -0.161905000 |
| 6 | -3.367904000 | -1.776018000 | -1.849398000 |
| 1 | -4.061848000 | -1.111154000 | -2.392446000 |
| 1 | -2.403432000 | -1.782867000 | -2.378298000 |
| 1 | -3.781563000 | -2.797423000 | -1.891433000 |
| 6 | -0.364214000 | 3.128164000  | -1.627394000 |
| 1 | -0.713237000 | 2.163374000  | -2.030282000 |
| 1 | -1.041946000 | 3.425922000  | -0.807509000 |
| 1 | -0.461786000 | 3.888601000  | -2.420803000 |
| 6 | 1.629785000  | 4.378608000  | -0.706654000 |
| 1 | 2.662909000  | 4.288209000  | -0.336341000 |
| 1 | 1.626615000  | 5.096429000  | -1.543890000 |
| 1 | 1.012312000  | 4.815722000  | 0.096295000  |
| 5 | -0.401538000 | -0.052059000 | 2.241392000  |
| 7 | -0.247343000 | -1.402127000 | -3.321389000 |
| 7 | -0.121233000 | -0.838473000 | -2.232124000 |
| 1 | 0.321372000  | -0.911280000 | -4.055979000 |

[4a''<sub>pc</sub>] (TE = -3517.016994)

|   |              |              |             |
|---|--------------|--------------|-------------|
| 6 | 1.103394000  | -0.818908000 | 1.752413000 |
| 6 | 1.769845000  | -0.389968000 | 2.914940000 |
| 1 | 1.403590000  | 0.501240000  | 3.436017000 |
| 6 | 2.877280000  | -1.061595000 | 3.426260000 |
| 1 | 3.368109000  | -0.685601000 | 4.329568000 |
| 6 | 3.350861000  | -2.210772000 | 2.799064000 |
| 1 | 4.219345000  | -2.746265000 | 3.193182000 |
| 6 | 2.710727000  | -2.661743000 | 1.646644000 |
| 1 | 3.104808000  | -3.546296000 | 1.134086000 |
| 6 | 1.613868000  | -1.979363000 | 1.107395000 |
| 6 | -0.153674000 | 1.351951000  | 1.704569000 |
| 6 | -0.975386000 | 1.758284000  | 2.773458000 |
| 1 | -1.601781000 | 1.015540000  | 3.278030000 |
| 6 | -1.029399000 | 3.080036000  | 3.205159000 |
| 1 | -1.689415000 | 3.351011000  | 4.035167000 |
| 6 | -0.245726000 | 4.050186000  | 2.586473000 |



|    |              |              |              |
|----|--------------|--------------|--------------|
| 1  | -0.282164000 | 5.093227000  | 2.913590000  |
| 6  | 0.584689000  | 3.674531000  | 1.534243000  |
| 1  | 1.188792000  | 4.442652000  | 1.044258000  |
| 6  | 0.633084000  | 2.350581000  | 1.082235000  |
| 6  | -1.408110000 | -0.755706000 | 1.596481000  |
| 6  | -1.536402000 | -1.573184000 | 2.729978000  |
| 1  | -0.641661000 | -1.812875000 | 3.315780000  |
| 6  | -2.771545000 | -2.072323000 | 3.136058000  |
| 1  | -2.833651000 | -2.707574000 | 4.025413000  |
| 6  | -3.925841000 | -1.753449000 | 2.424828000  |
| 1  | -4.900271000 | -2.135016000 | 2.742931000  |
| 6  | -3.825438000 | -0.942101000 | 1.295585000  |
| 1  | -4.732427000 | -0.694852000 | 0.735302000  |
| 6  | -2.586280000 | -0.459613000 | 0.863322000  |
| 6  | -0.108275000 | -0.085178000 | 1.230524000  |
| 23 | 0.056960000  | -0.094200000 | -1.097911000 |
| 6  | 2.435575000  | -2.870425000 | -1.574188000 |
| 1  | 2.968710000  | -3.677077000 | -1.036955000 |
| 6  | 1.463888000  | 3.340528000  | -1.550432000 |
| 1  | 0.445803000  | 3.715799000  | -1.319286000 |
| 6  | -3.453964000 | -0.216133000 | -2.018338000 |
| 1  | -3.015746000 | 0.261956000  | -2.917991000 |
| 6  | -4.935572000 | 0.125183000  | -1.979181000 |
| 1  | -5.435017000 | -0.299130000 | -2.867627000 |
| 1  | -5.445197000 | -0.298795000 | -1.098272000 |
| 1  | -5.126139000 | 1.208960000  | -1.989718000 |
| 6  | -3.226836000 | -1.714926000 | -2.160177000 |
| 1  | -3.646942000 | -2.267994000 | -1.301513000 |
| 1  | -3.719069000 | -2.091393000 | -3.072346000 |
| 1  | -2.151072000 | -1.949480000 | -2.232229000 |
| 6  | 1.980205000  | -3.385523000 | -2.933957000 |
| 1  | 1.450231000  | -4.348905000 | -2.875434000 |
| 1  | 1.308439000  | -2.659604000 | -3.426838000 |
| 1  | 2.850580000  | -3.533352000 | -3.595609000 |
| 6  | 3.371055000  | -1.688569000 | -1.741507000 |
| 1  | 3.709068000  | -1.281833000 | -0.773727000 |
| 1  | 4.267181000  | -1.976446000 | -2.317936000 |
| 1  | 2.858427000  | -0.877051000 | -2.289548000 |
| 6  | 2.455711000  | 4.476333000  | -1.332302000 |
| 1  | 2.160407000  | 5.347208000  | -1.942635000 |
| 1  | 2.527402000  | 4.820098000  | -0.289808000 |
| 1  | 3.470597000  | 4.196268000  | -1.656297000 |
| 6  | 1.474639000  | 2.903695000  | -3.010997000 |
| 1  | 2.434080000  | 2.429611000  | -3.285054000 |
| 1  | 0.675487000  | 2.174537000  | -3.218917000 |
| 1  | 1.337633000  | 3.775424000  | -3.673831000 |

|    |              |              |              |
|----|--------------|--------------|--------------|
| 15 | -2.307186000 | 0.456856000  | -0.701859000 |
| 15 | 1.532268000  | 1.827389000  | -0.429845000 |
| 15 | 0.942344000  | -2.360805000 | -0.563368000 |
| 6  | 3.309682000  | 1.548262000  | 0.125561000  |
| 1  | 3.230607000  | 0.518776000  | 0.529567000  |
| 6  | 4.276081000  | 1.517510000  | -1.051066000 |
| 1  | 4.537038000  | 2.532170000  | -1.392321000 |
| 1  | 5.219469000  | 1.026157000  | -0.756824000 |
| 1  | 3.875284000  | 0.966020000  | -1.916145000 |
| 6  | 3.811149000  | 2.442852000  | 1.246018000  |
| 1  | 4.815626000  | 2.113160000  | 1.565182000  |
| 1  | 3.899828000  | 3.496214000  | 0.930256000  |
| 1  | 3.154297000  | 2.406868000  | 2.129382000  |
| 6  | 0.005767000  | -3.987726000 | -0.478375000 |
| 1  | -0.281637000 | -4.137605000 | -1.538015000 |
| 6  | -1.265621000 | -3.881598000 | 0.341666000  |
| 1  | -1.033389000 | -3.789208000 | 1.415534000  |
| 1  | -1.877079000 | -3.010664000 | 0.060027000  |
| 1  | -1.878324000 | -4.789960000 | 0.212117000  |
| 6  | 0.835857000  | -5.171471000 | -0.008526000 |
| 1  | 0.225866000  | -6.091151000 | -0.028120000 |
| 1  | 1.727565000  | -5.360035000 | -0.626879000 |
| 1  | 1.166038000  | -5.027541000 | 1.035318000  |
| 6  | -2.772389000 | 2.243805000  | -0.402276000 |
| 1  | -1.914926000 | 2.578451000  | 0.211533000  |
| 6  | -4.036331000 | 2.510653000  | 0.396388000  |
| 1  | -4.114797000 | 3.587273000  | 0.629540000  |
| 1  | -4.951551000 | 2.226502000  | -0.148206000 |
| 1  | -4.032030000 | 1.967702000  | 1.355563000  |
| 6  | -2.711287000 | 3.005870000  | -1.718677000 |
| 1  | -2.714280000 | 4.094356000  | -1.538062000 |
| 1  | -1.791812000 | 2.759734000  | -2.281556000 |
| 1  | -3.571649000 | 2.781901000  | -2.372486000 |
| 7  | -0.331051000 | -0.437215000 | -4.085278000 |
| 7  | -0.075705000 | -0.231616000 | -2.895155000 |
| 1  | 0.235861000  | 0.203821000  | -4.691670000 |

[4b''<sub>psi</sub>] (TE = -3768.375289)

|   |             |              |             |
|---|-------------|--------------|-------------|
| 6 | 1.188507000 | -1.470883000 | 1.956481000 |
| 6 | 1.110169000 | -2.074739000 | 3.218882000 |
| 1 | 0.298490000 | -1.794193000 | 3.902455000 |
| 6 | 2.030325000 | -3.041290000 | 3.618429000 |
| 1 | 1.947359000 | -3.506528000 | 4.605668000 |
| 6 | 3.056987000 | -3.416251000 | 2.753204000 |
| 1 | 3.787156000 | -4.171907000 | 3.058520000 |

|    |              |              |              |
|----|--------------|--------------|--------------|
| 6  | 3.146209000  | -2.837706000 | 1.488912000  |
| 1  | 3.950945000  | -3.156607000 | 0.818730000  |
| 6  | 2.212271000  | -1.878457000 | 1.077515000  |
| 6  | 0.540545000  | 1.501427000  | 2.123878000  |
| 6  | 1.043347000  | 1.602149000  | 3.427902000  |
| 1  | 1.096784000  | 0.703915000  | 4.056305000  |
| 6  | 1.513984000  | 2.810871000  | 3.935574000  |
| 1  | 1.915759000  | 2.862768000  | 4.952344000  |
| 6  | 1.480075000  | 3.951915000  | 3.137312000  |
| 1  | 1.851113000  | 4.906657000  | 3.522224000  |
| 6  | 0.981755000  | 3.876883000  | 1.838186000  |
| 1  | 0.976337000  | 4.784772000  | 1.229502000  |
| 6  | 0.520638000  | 2.660409000  | 1.318639000  |
| 6  | -1.772877000 | -0.503838000 | 1.927139000  |
| 6  | -2.218351000 | -0.228613000 | 3.227552000  |
| 1  | -1.499907000 | 0.117076000  | 3.981840000  |
| 6  | -3.563097000 | -0.332827000 | 3.573789000  |
| 1  | -3.890687000 | -0.095938000 | 4.590869000  |
| 6  | -4.493324000 | -0.720806000 | 2.611292000  |
| 1  | -5.554981000 | -0.791561000 | 2.866488000  |
| 6  | -4.072605000 | -1.013891000 | 1.316427000  |
| 1  | -4.821837000 | -1.309436000 | 0.577425000  |
| 6  | -2.720876000 | -0.909440000 | 0.962494000  |
| 23 | 0.067180000  | 0.064916000  | -1.220899000 |
| 6  | 3.756708000  | -0.073011000 | -0.599824000 |
| 1  | 4.612880000  | -0.760015000 | -0.464699000 |
| 6  | -1.780334000 | 3.262315000  | -0.366289000 |
| 1  | -1.600461000 | 4.327540000  | -0.128945000 |
| 6  | -1.978900000 | -3.098938000 | -0.845216000 |
| 1  | -2.044230000 | -3.293581000 | -1.935905000 |
| 6  | -3.068192000 | -3.868527000 | -0.113532000 |
| 1  | -2.934363000 | -4.951021000 | -0.283268000 |
| 1  | -2.995186000 | -3.699901000 | 0.974497000  |
| 1  | -4.089746000 | -3.612978000 | -0.424219000 |
| 6  | -0.622592000 | -3.571968000 | -0.350609000 |
| 1  | -0.505058000 | -3.385664000 | 0.732656000  |
| 1  | -0.507269000 | -4.657356000 | -0.513086000 |
| 1  | 0.199846000  | -3.055269000 | -0.863530000 |
| 6  | 3.888719000  | 0.663781000  | -1.922713000 |
| 1  | 3.843457000  | -0.002033000 | -2.800848000 |
| 1  | 3.065656000  | 1.391748000  | -2.025038000 |
| 1  | 4.839159000  | 1.222324000  | -1.969320000 |
| 6  | 3.733617000  | 0.907999000  | 0.560485000  |
| 1  | 3.697187000  | 0.405808000  | 1.540726000  |
| 1  | 4.635509000  | 1.543411000  | 0.538462000  |
| 1  | 2.855535000  | 1.575858000  | 0.499438000  |

|    |              |              |              |
|----|--------------|--------------|--------------|
| 6  | -2.449685000 | 3.142310000  | -1.725974000 |
| 1  | -3.466684000 | 3.569944000  | -1.701601000 |
| 1  | -1.894427000 | 3.651755000  | -2.530097000 |
| 1  | -2.536446000 | 2.078606000  | -2.011392000 |
| 6  | -2.661499000 | 2.674252000  | 0.721431000  |
| 1  | -2.872557000 | 1.607629000  | 0.534442000  |
| 1  | -2.208390000 | 2.751663000  | 1.723008000  |
| 1  | -3.629816000 | 3.202635000  | 0.747098000  |
| 14 | -0.005422000 | -0.137072000 | 1.299574000  |
| 15 | -0.082320000 | 2.453251000  | -0.426564000 |
| 15 | -2.088706000 | -1.214870000 | -0.755511000 |
| 15 | 2.215031000  | -1.143065000 | -0.629074000 |
| 6  | 2.709851000  | -2.632251000 | -1.705381000 |
| 1  | 2.322912000  | -3.482711000 | -1.111685000 |
| 6  | 4.199467000  | -2.852757000 | -1.928845000 |
| 1  | 4.352367000  | -3.791543000 | -2.488573000 |
| 1  | 4.645413000  | -2.047087000 | -2.535474000 |
| 1  | 4.785713000  | -2.931721000 | -1.000089000 |
| 6  | 1.977075000  | -2.615652000 | -3.038983000 |
| 1  | 0.891086000  | -2.465664000 | -2.921757000 |
| 1  | 2.327890000  | -1.798005000 | -3.690702000 |
| 1  | 2.145213000  | -3.565070000 | -3.575936000 |
| 6  | -3.517658000 | -0.774439000 | -1.915239000 |
| 1  | -3.907028000 | 0.162618000  | -1.465988000 |
| 6  | -2.934484000 | -0.450903000 | -3.285323000 |
| 1  | -2.419982000 | -1.327832000 | -3.719748000 |
| 1  | -3.734786000 | -0.156370000 | -3.985442000 |
| 1  | -2.191824000 | 0.359508000  | -3.244879000 |
| 6  | -4.671299000 | -1.752552000 | -2.093291000 |
| 1  | -4.329630000 | -2.697764000 | -2.548489000 |
| 1  | -5.210557000 | -1.999269000 | -1.167608000 |
| 1  | -5.411494000 | -1.319085000 | -2.787559000 |
| 6  | 0.940267000  | 3.717950000  | -1.407375000 |
| 1  | 1.930824000  | 3.647976000  | -0.913642000 |
| 6  | 0.472521000  | 5.168094000  | -1.371767000 |
| 1  | 1.226143000  | 5.810781000  | -1.858269000 |
| 1  | -0.465146000 | 5.299224000  | -1.937755000 |
| 1  | 0.304694000  | 5.573443000  | -0.363398000 |
| 6  | 1.105528000  | 3.287138000  | -2.858446000 |
| 1  | 1.525219000  | 2.274823000  | -2.942848000 |
| 1  | 0.136962000  | 3.279235000  | -3.390154000 |
| 1  | 1.768485000  | 3.990734000  | -3.390762000 |
| 7  | 0.489470000  | 0.124080000  | -4.230711000 |
| 7  | 0.295679000  | 0.159172000  | -3.013040000 |
| 1  | 0.664299000  | 1.090606000  | -4.600162000 |

[4c''<sub>PB</sub>] (TE = -3503.789021)

|    |              |              |              |
|----|--------------|--------------|--------------|
| 6  | -1.481514000 | 0.625216000  | 1.925591000  |
| 6  | -1.610484000 | 1.338813000  | 3.132201000  |
| 1  | -0.706121000 | 1.579578000  | 3.703855000  |
| 6  | -2.842448000 | 1.759679000  | 3.625499000  |
| 1  | -2.892997000 | 2.315886000  | 4.566917000  |
| 6  | -4.006977000 | 1.472420000  | 2.917645000  |
| 1  | -4.982826000 | 1.793832000  | 3.293568000  |
| 6  | -3.913843000 | 0.782410000  | 1.712793000  |
| 1  | -4.830214000 | 0.577683000  | 1.150231000  |
| 6  | -2.672889000 | 0.373311000  | 1.207621000  |
| 6  | 0.413531000  | -1.348195000 | 1.972058000  |
| 6  | -0.029984000 | -1.804491000 | 3.226583000  |
| 1  | -0.757938000 | -1.199746000 | 3.781545000  |
| 6  | 0.423187000  | -2.994044000 | 3.790567000  |
| 1  | 0.044870000  | -3.315076000 | 4.766351000  |
| 6  | 1.367601000  | -3.766282000 | 3.118048000  |
| 1  | 1.744855000  | -4.694537000 | 3.557235000  |
| 6  | 1.817066000  | -3.350163000 | 1.867617000  |
| 1  | 2.548258000  | -3.966246000 | 1.334569000  |
| 6  | 1.330835000  | -2.175681000 | 1.279375000  |
| 6  | 1.158098000  | 1.208063000  | 1.722177000  |
| 6  | 1.845500000  | 1.179497000  | 2.951244000  |
| 1  | 1.584349000  | 0.405965000  | 3.684158000  |
| 6  | 2.860277000  | 2.077869000  | 3.262800000  |
| 1  | 3.369551000  | 2.014850000  | 4.229651000  |
| 6  | 3.236229000  | 3.045291000  | 2.333268000  |
| 1  | 4.041980000  | 3.750963000  | 2.555831000  |
| 6  | 2.580826000  | 3.098740000  | 1.108497000  |
| 1  | 2.895810000  | 3.849819000  | 0.379712000  |
| 6  | 1.550893000  | 2.198871000  | 0.794955000  |
| 23 | -0.130878000 | -0.195107000 | -1.175856000 |
| 6  | -3.254724000 | -2.090229000 | -0.285292000 |
| 1  | -4.315354000 | -1.945691000 | -0.003307000 |
| 6  | 3.568836000  | -1.393525000 | -0.504270000 |
| 1  | 4.052298000  | -2.353766000 | -0.241715000 |
| 6  | -0.354661000 | 3.702376000  | -0.905374000 |
| 1  | -0.405979000 | 3.937416000  | -1.988556000 |
| 6  | 0.161237000  | 4.911993000  | -0.142290000 |
| 1  | -0.535822000 | 5.757559000  | -0.273998000 |
| 1  | 0.210145000  | 4.695049000  | 0.938434000  |
| 1  | 1.154949000  | 5.254788000  | -0.461341000 |
| 6  | -1.751114000 | 3.357892000  | -0.421282000 |
| 1  | -1.745507000 | 3.068811000  | 0.645598000  |

|    |              |              |              |
|----|--------------|--------------|--------------|
| 1  | -2.426652000 | 4.223547000  | -0.529509000 |
| 1  | -2.172993000 | 2.517869000  | -0.988763000 |
| 6  | -3.186442000 | -2.819700000 | -1.621672000 |
| 1  | -3.868128000 | -2.387625000 | -2.371293000 |
| 1  | -2.176190000 | -2.781791000 | -2.061454000 |
| 1  | -3.463918000 | -3.880855000 | -1.499640000 |
| 6  | -2.570419000 | -2.852372000 | 0.838585000  |
| 1  | -2.747964000 | -2.380415000 | 1.818406000  |
| 1  | -2.951263000 | -3.887004000 | 0.886185000  |
| 1  | -1.477068000 | -2.902638000 | 0.700810000  |
| 6  | 3.963619000  | -0.994932000 | -1.918928000 |
| 1  | 5.050882000  | -0.820225000 | -1.988339000 |
| 1  | 3.698922000  | -1.752237000 | -2.674925000 |
| 1  | 3.456841000  | -0.057207000 | -2.208634000 |
| 6  | 4.008973000  | -0.349287000 | 0.503536000  |
| 1  | 3.556879000  | 0.633651000  | 0.288801000  |
| 1  | 3.731267000  | -0.619502000 | 1.534918000  |
| 1  | 5.105088000  | -0.227365000 | 0.467434000  |
| 5  | -0.012734000 | 0.127822000  | 1.514053000  |
| 7  | -0.343496000 | -1.576933000 | -3.867497000 |
| 7  | -0.255652000 | -0.908656000 | -2.836069000 |
| 1  | -0.093712000 | -0.989264000 | -4.700777000 |
| 15 | 0.742738000  | 2.169685000  | -0.856923000 |
| 15 | -2.520460000 | -0.378382000 | -0.464382000 |
| 15 | 1.727621000  | -1.727525000 | -0.460871000 |
| 6  | 2.099534000  | 2.546056000  | -2.117089000 |
| 1  | 2.965001000  | 1.985380000  | -1.709523000 |
| 6  | 2.516615000  | 3.993121000  | -2.340162000 |
| 1  | 3.317445000  | 4.030100000  | -3.098271000 |
| 1  | 1.682554000  | 4.599692000  | -2.732520000 |
| 1  | 2.906405000  | 4.494774000  | -1.442757000 |
| 6  | 1.703024000  | 1.927202000  | -3.453486000 |
| 1  | 1.517053000  | 0.844380000  | -3.370479000 |
| 1  | 0.774831000  | 2.386019000  | -3.843666000 |
| 1  | 2.493029000  | 2.093550000  | -4.205911000 |
| 6  | 1.619050000  | -3.318194000 | -1.472333000 |
| 1  | 1.530806000  | -2.907966000 | -2.497180000 |
| 6  | 0.318244000  | -4.041427000 | -1.174611000 |
| 1  | -0.526174000 | -3.338511000 | -1.177687000 |
| 1  | 0.120633000  | -4.811526000 | -1.939077000 |
| 1  | 0.342094000  | -4.538586000 | -0.189251000 |
| 6  | 2.794385000  | -4.284042000 | -1.453140000 |
| 1  | 2.589795000  | -5.111436000 | -2.154495000 |
| 1  | 3.746083000  | -3.829032000 | -1.767114000 |
| 1  | 2.949406000  | -4.744966000 | -0.463625000 |
| 6  | -3.805802000 | 0.539077000  | -1.513202000 |

|   |              |              |              |
|---|--------------|--------------|--------------|
| 1 | -3.839044000 | 1.533834000  | -1.032846000 |
| 6 | -5.227056000 | -0.007125000 | -1.525486000 |
| 1 | -5.880814000 | 0.685043000  | -2.083524000 |
| 1 | -5.293726000 | -0.982781000 | -2.033124000 |
| 1 | -5.665451000 | -0.125076000 | -0.522640000 |
| 6 | -3.287161000 | 0.711074000  | -2.935362000 |
| 1 | -2.286319000 | 1.176669000  | -2.958312000 |
| 1 | -3.196619000 | -0.260208000 | -3.452561000 |
| 1 | -3.976136000 | 1.339703000  | -3.525466000 |

[4d''<sub>sc</sub>] (TE = -3332.655948)

|    |              |              |              |
|----|--------------|--------------|--------------|
| 6  | 0.182905000  | 1.660183000  | 1.053958000  |
| 6  | 0.965155000  | 2.209642000  | 2.087387000  |
| 1  | 1.592573000  | 1.539849000  | 2.684857000  |
| 6  | 0.960467000  | 3.569026000  | 2.387681000  |
| 1  | 1.584460000  | 3.942833000  | 3.205436000  |
| 6  | 0.163910000  | 4.449377000  | 1.658251000  |
| 1  | 0.153875000  | 5.518415000  | 1.888185000  |
| 6  | -0.588052000 | 3.950734000  | 0.599692000  |
| 1  | -1.170105000 | 4.627868000  | -0.034883000 |
| 6  | -0.569601000 | 2.586747000  | 0.297471000  |
| 6  | -1.021139000 | -0.455503000 | 1.581599000  |
| 6  | -1.451883000 | 0.059193000  | 2.818924000  |
| 1  | -0.994419000 | 0.981247000  | 3.192883000  |
| 6  | -2.427657000 | -0.564303000 | 3.590868000  |
| 1  | -2.722420000 | -0.122109000 | 4.547592000  |
| 6  | -3.022975000 | -1.746338000 | 3.154666000  |
| 1  | -3.789820000 | -2.243145000 | 3.755426000  |
| 6  | -2.657680000 | -2.261257000 | 1.915612000  |
| 1  | -3.159102000 | -3.148838000 | 1.514717000  |
| 6  | -1.685666000 | -1.622665000 | 1.140361000  |
| 6  | 1.424685000  | -0.500109000 | 1.168895000  |
| 6  | 1.653159000  | -1.023927000 | 2.456054000  |
| 1  | 0.847141000  | -0.969987000 | 3.195055000  |
| 6  | 2.859798000  | -1.607837000 | 2.827669000  |
| 1  | 2.981068000  | -1.996203000 | 3.843619000  |
| 6  | 3.904478000  | -1.705378000 | 1.911658000  |
| 1  | 4.851873000  | -2.176636000 | 2.187470000  |
| 6  | 3.707486000  | -1.230072000 | 0.620178000  |
| 1  | 4.486129000  | -1.361484000 | -0.137053000 |
| 6  | 2.496019000  | -0.631562000 | 0.255340000  |
| 16 | 2.219930000  | -0.325843000 | -1.492114000 |
| 16 | -1.296352000 | 2.068260000  | -1.253926000 |
| 16 | -1.507112000 | -2.144474000 | -0.561739000 |
| 23 | -0.265152000 | -0.180075000 | -1.426172000 |
| 6  | -3.143463000 | 2.033575000  | -0.987912000 |

|   |              |              |              |
|---|--------------|--------------|--------------|
| 1 | -3.432237000 | 3.101040000  | -0.998150000 |
| 6 | -0.576435000 | -3.758655000 | -0.527443000 |
| 1 | -1.315914000 | -4.493406000 | -0.158667000 |
| 6 | 3.119399000  | 1.257789000  | -1.915005000 |
| 1 | 2.969380000  | 1.253305000  | -3.010921000 |
| 6 | 4.595241000  | 1.146072000  | -1.603820000 |
| 1 | 5.124114000  | 2.034247000  | -1.988567000 |
| 1 | 4.767677000  | 1.109017000  | -0.514648000 |
| 1 | 5.050850000  | 0.253456000  | -2.060426000 |
| 6 | 2.487585000  | 2.491208000  | -1.319082000 |
| 1 | 2.546319000  | 2.479492000  | -0.217031000 |
| 1 | 3.017049000  | 3.391559000  | -1.674901000 |
| 1 | 1.428819000  | 2.583600000  | -1.605887000 |
| 6 | -3.709861000 | 1.321392000  | -2.198520000 |
| 1 | -3.382399000 | 1.779485000  | -3.145555000 |
| 1 | -3.379997000 | 0.267463000  | -2.209835000 |
| 1 | -4.811558000 | 1.343495000  | -2.167882000 |
| 6 | -3.565944000 | 1.392819000  | 0.309598000  |
| 1 | -3.108188000 | 1.874771000  | 1.187868000  |
| 1 | -4.661883000 | 1.467312000  | 0.413924000  |
| 1 | -3.296486000 | 0.323303000  | 0.325403000  |
| 6 | -0.234630000 | -4.042008000 | -1.976238000 |
| 1 | 0.238956000  | -5.032882000 | -2.070526000 |
| 1 | -1.124956000 | -4.020974000 | -2.625721000 |
| 1 | 0.475501000  | -3.282637000 | -2.351331000 |
| 6 | 0.639925000  | -3.745343000 | 0.362837000  |
| 1 | 1.383723000  | -3.018054000 | -0.004557000 |
| 1 | 0.395488000  | -3.486100000 | 1.405119000  |
| 1 | 1.110775000  | -4.743333000 | 0.361907000  |
| 6 | 0.116226000  | 0.168754000  | 0.796032000  |
| 7 | -1.467754000 | -0.746318000 | -4.145264000 |
| 7 | -0.837250000 | -0.495820000 | -3.120388000 |
| 1 | -0.814943000 | -0.915698000 | -4.947216000 |

[4e''<sub>ssi</sub>] (TE = -3584.016690)

|   |             |              |             |
|---|-------------|--------------|-------------|
| 6 | 1.111456000 | -1.139409000 | 1.841338000 |
| 6 | 1.273275000 | -1.219605000 | 3.232603000 |
| 1 | 0.779282000 | -0.481854000 | 3.876955000 |
| 6 | 2.044027000 | -2.216430000 | 3.826532000 |
| 1 | 2.152700000 | -2.250038000 | 4.914858000 |
| 6 | 2.669745000 | -3.177114000 | 3.032652000 |
| 1 | 3.268978000 | -3.968898000 | 3.491724000 |
| 6 | 2.508004000 | -3.142805000 | 1.650768000 |
| 1 | 2.963550000 | -3.915688000 | 1.022320000 |
| 6 | 1.743442000 | -2.128206000 | 1.067289000 |



|    |              |              |              |
|----|--------------|--------------|--------------|
| 6  | 1.126412000  | 1.817271000  | 1.029803000  |
| 6  | 1.592859000  | 2.390112000  | 2.222647000  |
| 1  | 1.386331000  | 1.889608000  | 3.176884000  |
| 6  | 2.319673000  | 3.578354000  | 2.233687000  |
| 1  | 2.665452000  | 4.000586000  | 3.182176000  |
| 6  | 2.616861000  | 4.223539000  | 1.033416000  |
| 1  | 3.197022000  | 5.150994000  | 1.032757000  |
| 6  | 2.191716000  | 3.669990000  | -0.170481000 |
| 1  | 2.448109000  | 4.149976000  | -1.121201000 |
| 6  | 1.445805000  | 2.487536000  | -0.162536000 |
| 6  | -1.572195000 | 0.495177000  | 1.705483000  |
| 6  | -1.782665000 | 0.996586000  | 2.998667000  |
| 1  | -0.920693000 | 1.193685000  | 3.648012000  |
| 6  | -3.059286000 | 1.271512000  | 3.483537000  |
| 1  | -3.188380000 | 1.660355000  | 4.498218000  |
| 6  | -4.169856000 | 1.072877000  | 2.665080000  |
| 1  | -5.174456000 | 1.308616000  | 3.028306000  |
| 6  | -3.995689000 | 0.593614000  | 1.369849000  |
| 1  | -4.857875000 | 0.473152000  | 0.706727000  |
| 6  | -2.711721000 | 0.285670000  | 0.906167000  |
| 16 | -2.564963000 | -0.300897000 | -0.804923000 |
| 16 | 1.520981000  | -2.183196000 | -0.729403000 |
| 16 | 0.954232000  | 1.804179000  | -1.766983000 |
| 23 | -0.156250000 | -0.459873000 | -1.517680000 |
| 6  | 3.242192000  | -1.803865000 | -1.330840000 |
| 1  | 3.853118000  | -2.656014000 | -0.981057000 |
| 6  | -0.329599000 | 3.044899000  | -2.306605000 |
| 1  | 0.237991000  | 3.985404000  | -2.429068000 |
| 6  | -3.055612000 | -2.099251000 | -0.681563000 |
| 1  | -2.880618000 | -2.407767000 | -1.729574000 |
| 6  | -4.519109000 | -2.252247000 | -0.329773000 |
| 1  | -4.812976000 | -3.310543000 | -0.432478000 |
| 1  | -4.714377000 | -1.960135000 | 0.716174000  |
| 1  | -5.168170000 | -1.653310000 | -0.987589000 |
| 6  | -2.149864000 | -2.885327000 | 0.238336000  |
| 1  | -2.175242000 | -2.490439000 | 1.269571000  |
| 1  | -2.482241000 | -3.936489000 | 0.275241000  |
| 1  | -1.107122000 | -2.875305000 | -0.115807000 |
| 6  | 3.170899000  | -1.801915000 | -2.843559000 |
| 1  | 2.755059000  | -2.742232000 | -3.239479000 |
| 1  | 2.532630000  | -0.972547000 | -3.197824000 |
| 1  | 4.177836000  | -1.661787000 | -3.269667000 |
| 6  | 3.779755000  | -0.507654000 | -0.772774000 |
| 1  | 3.772627000  | -0.486989000 | 0.328826000  |
| 1  | 4.820209000  | -0.358300000 | -1.107999000 |
| 1  | 3.184827000  | 0.346620000  | -1.138004000 |

|    |              |              |              |
|----|--------------|--------------|--------------|
| 6  | -0.849737000 | 2.572262000  | -3.647492000 |
| 1  | -1.573956000 | 3.300049000  | -4.048564000 |
| 1  | -0.040919000 | 2.448566000  | -4.384914000 |
| 1  | -1.367107000 | 1.601684000  | -3.540528000 |
| 6  | -1.428062000 | 3.225568000  | -1.286067000 |
| 1  | -2.012430000 | 2.296615000  | -1.176234000 |
| 1  | -1.041192000 | 3.510250000  | -0.294592000 |
| 1  | -2.119290000 | 4.017841000  | -1.620069000 |
| 14 | 0.124388000  | 0.184441000  | 0.873942000  |
| 7  | -1.239485000 | -2.314028000 | -3.637280000 |
| 7  | -0.683977000 | -1.441261000 | -2.968089000 |
| 1  | -1.082486000 | -2.151931000 | -4.661131000 |

[4f'<sub>SB</sub>] (TE = -3319.434673)

|    |              |              |              |
|----|--------------|--------------|--------------|
| 6  | -0.144721000 | 1.821736000  | 1.152636000  |
| 6  | 0.372518000  | 2.501008000  | 2.271768000  |
| 1  | 0.976756000  | 1.940524000  | 2.995923000  |
| 6  | 0.160173000  | 3.859789000  | 2.490073000  |
| 1  | 0.584642000  | 4.341691000  | 3.376307000  |
| 6  | -0.582937000 | 4.606903000  | 1.577618000  |
| 1  | -0.749830000 | 5.676242000  | 1.735569000  |
| 6  | -1.082009000 | 3.980768000  | 0.440510000  |
| 1  | -1.625558000 | 4.556035000  | -0.316880000 |
| 6  | -0.863250000 | 2.614319000  | 0.239314000  |
| 6  | -1.043247000 | -0.670922000 | 1.717063000  |
| 6  | -1.495763000 | -0.339302000 | 3.008228000  |
| 1  | -1.117192000 | 0.575848000  | 3.480193000  |
| 6  | -2.413436000 | -1.119550000 | 3.706648000  |
| 1  | -2.733234000 | -0.817478000 | 4.708799000  |
| 6  | -2.930773000 | -2.277386000 | 3.127941000  |
| 1  | -3.657978000 | -2.893537000 | 3.664424000  |
| 6  | -2.537207000 | -2.620911000 | 1.839282000  |
| 1  | -2.969120000 | -3.496168000 | 1.341870000  |
| 6  | -1.610193000 | -1.828851000 | 1.154254000  |
| 6  | 1.587860000  | -0.262753000 | 1.309166000  |
| 6  | 1.948125000  | -0.612437000 | 2.624374000  |
| 1  | 1.186333000  | -0.556690000 | 3.411619000  |
| 6  | 3.224334000  | -1.053060000 | 2.963522000  |
| 1  | 3.451722000  | -1.315929000 | 4.001270000  |
| 6  | 4.203209000  | -1.180464000 | 1.980014000  |
| 1  | 5.202809000  | -1.547270000 | 2.229890000  |
| 6  | 3.882231000  | -0.867683000 | 0.663411000  |
| 1  | 4.617296000  | -1.016392000 | -0.133903000 |
| 6  | 2.601302000  | -0.402554000 | 0.342902000  |
| 16 | 2.218754000  | -0.192394000 | -1.401972000 |

|    |              |              |              |
|----|--------------|--------------|--------------|
| 16 | -1.381742000 | 1.934042000  | -1.340323000 |
| 16 | -1.312950000 | -2.236700000 | -0.568741000 |
| 23 | -0.242179000 | -0.245381000 | -1.565507000 |
| 6  | -3.227469000 | 1.715409000  | -1.142499000 |
| 1  | -3.612461000 | 2.751910000  | -1.166027000 |
| 6  | -0.215543000 | -3.744042000 | -0.500541000 |
| 1  | -0.895972000 | -4.553166000 | -0.176427000 |
| 6  | 2.954759000  | 1.466785000  | -1.850804000 |
| 1  | 2.526977000  | 1.588964000  | -2.863595000 |
| 6  | 4.463186000  | 1.370792000  | -1.932619000 |
| 1  | 4.875287000  | 2.304523000  | -2.351030000 |
| 1  | 4.903519000  | 1.241608000  | -0.929204000 |
| 1  | 4.792125000  | 0.534057000  | -2.568137000 |
| 6  | 2.492977000  | 2.588927000  | -0.953199000 |
| 1  | 2.798864000  | 2.414540000  | 0.093137000  |
| 1  | 2.948170000  | 3.538449000  | -1.281713000 |
| 1  | 1.400387000  | 2.710782000  | -0.970512000 |
| 6  | -3.697616000 | 0.951184000  | -2.361428000 |
| 1  | -3.383504000 | 1.428834000  | -3.303239000 |
| 1  | -3.286271000 | -0.073661000 | -2.354948000 |
| 1  | -4.797858000 | 0.883021000  | -2.359569000 |
| 6  | -3.617482000 | 1.044264000  | 0.151021000  |
| 1  | -3.231862000 | 1.574574000  | 1.036103000  |
| 1  | -4.717496000 | 1.008697000  | 0.227748000  |
| 1  | -3.242638000 | 0.007386000  | 0.185399000  |
| 6  | 0.239380000  | -3.986345000 | -1.924542000 |
| 1  | 0.809665000  | -4.927714000 | -1.985787000 |
| 1  | -0.608104000 | -4.050309000 | -2.626337000 |
| 1  | 0.897615000  | -3.165020000 | -2.261709000 |
| 6  | 0.933416000  | -3.609074000 | 0.467733000  |
| 1  | 1.615957000  | -2.799462000 | 0.159011000  |
| 1  | 0.594085000  | -3.393582000 | 1.493341000  |
| 1  | 1.509638000  | -4.549693000 | 0.490604000  |
| 5  | 0.088337000  | 0.240046000  | 1.034081000  |
| 7  | -1.223499000 | -0.872246000 | -4.353810000 |
| 7  | -0.694676000 | -0.598068000 | -3.278978000 |
| 1  | -0.503039000 | -0.944388000 | -5.110900000 |

Cartesian coordinates of  $[3\text{-V-H}]^+$ , along with their total energies (in hartree) including zero point vibrational correction at M06-L-D3(heptane)/6-311+G\* level of theory.

$[3\text{a}'_{\text{PC}}\text{-V-H}]^+$  (TE = -3062.522570)

|   |              |             |             |
|---|--------------|-------------|-------------|
| 6 | -0.410706000 | 2.175615000 | 1.943146000 |
| 6 | 0.344230000  | 1.104044000 | 2.731607000 |

|    |              |              |              |
|----|--------------|--------------|--------------|
| 6  | -2.474542000 | -0.549950000 | 2.067535000  |
| 6  | -1.190096000 | -1.001491000 | 2.760978000  |
| 6  | 2.595973000  | -0.983014000 | 1.854002000  |
| 6  | 1.316962000  | -1.252862000 | 2.646394000  |
| 1  | -2.687177000 | 0.508245000  | 2.248591000  |
| 1  | -1.320402000 | -0.860126000 | 3.848583000  |
| 1  | 3.398129000  | -1.642308000 | 2.207061000  |
| 1  | 1.559628000  | -1.163311000 | 3.721118000  |
| 1  | -0.202645000 | 3.163226000  | 2.368009000  |
| 1  | 1.417352000  | 1.327278000  | 2.681855000  |
| 6  | -1.034318000 | 3.363721000  | -0.728712000 |
| 1  | -0.380257000 | 4.231528000  | -0.887042000 |
| 6  | -2.852542000 | -2.619684000 | 0.067070000  |
| 1  | -2.187304000 | -3.068230000 | 0.821030000  |
| 6  | 3.763669000  | -0.119151000 | -0.666910000 |
| 1  | 3.396152000  | 0.891984000  | -0.451124000 |
| 23 | -0.008601000 | -0.403031000 | -0.301743000 |
| 6  | 0.127328000  | -0.357022000 | 2.392790000  |
| 1  | -1.491764000 | 2.044019000  | 2.023242000  |
| 1  | 0.086966000  | 1.218069000  | 3.798800000  |
| 1  | 1.012275000  | -2.292073000 | 2.501865000  |
| 1  | 2.959161000  | 0.037747000  | 2.031024000  |
| 1  | -1.085475000 | -2.083289000 | 2.621277000  |
| 1  | -3.324797000 | -1.094422000 | 2.495549000  |
| 6  | 5.136948000  | -0.226120000 | -0.011024000 |
| 1  | 5.764263000  | 0.608990000  | -0.341054000 |
| 1  | 5.090553000  | -0.174687000 | 1.080380000  |
| 1  | 5.669452000  | -1.140070000 | -0.274120000 |
| 6  | 3.825850000  | -0.248083000 | -2.184854000 |
| 1  | 4.200383000  | -1.224221000 | -2.505752000 |
| 1  | 2.846527000  | -0.106958000 | -2.653720000 |
| 1  | 4.499106000  | 0.504489000  | -2.607347000 |
| 6  | -4.289199000 | -2.987293000 | 0.408314000  |
| 1  | -4.392190000 | -4.075655000 | 0.467632000  |
| 1  | -4.622695000 | -2.582017000 | 1.368057000  |
| 1  | -4.991939000 | -2.648957000 | -0.358616000 |
| 6  | -2.432603000 | -3.175405000 | -1.288665000 |
| 1  | -2.996526000 | -2.731255000 | -2.114540000 |
| 1  | -1.368288000 | -3.008676000 | -1.476328000 |
| 1  | -2.609073000 | -4.255037000 | -1.327317000 |
| 6  | -1.437203000 | 2.831790000  | -2.099925000 |
| 1  | -0.568634000 | 2.564712000  | -2.709986000 |
| 1  | -2.062339000 | 1.936219000  | -2.022867000 |
| 1  | -2.007112000 | 3.583641000  | -2.654913000 |
| 6  | -2.228891000 | 3.841553000  | 0.084989000  |
| 1  | -1.931488000 | 4.327513000  | 1.018127000  |

|    |              |              |              |
|----|--------------|--------------|--------------|
| 1  | -2.805791000 | 4.571895000  | -0.490689000 |
| 1  | -2.919627000 | 3.031338000  | 0.342008000  |
| 6  | 2.708891000  | -2.935343000 | -0.398683000 |
| 1  | 2.289938000  | -3.036662000 | -1.411848000 |
| 6  | 1.962237000  | -3.897277000 | 0.520101000  |
| 1  | 2.385956000  | -3.889518000 | 1.530745000  |
| 1  | 0.896479000  | -3.672273000 | 0.589963000  |
| 1  | 2.068333000  | -4.920026000 | 0.145625000  |
| 6  | 4.182277000  | -3.323454000 | -0.438108000 |
| 1  | 4.273933000  | -4.392839000 | -0.653789000 |
| 1  | 4.750698000  | -2.796110000 | -1.204517000 |
| 1  | 4.676533000  | -3.153686000 | 0.524357000  |
| 6  | -3.817460000 | 0.224909000  | -0.404269000 |
| 1  | -3.367463000 | 1.227867000  | -0.381329000 |
| 6  | -5.089704000 | 0.283045000  | 0.432851000  |
| 1  | -5.649690000 | -0.653395000 | 0.411917000  |
| 1  | -4.899284000 | 0.531406000  | 1.480497000  |
| 1  | -5.755578000 | 1.058318000  | 0.038912000  |
| 6  | -4.109783000 | -0.106376000 | -1.863787000 |
| 1  | -4.633297000 | -1.061796000 | -1.964084000 |
| 1  | -4.754461000 | 0.656794000  | -2.310874000 |
| 1  | -3.202082000 | -0.165284000 | -2.473941000 |
| 6  | 1.717683000  | 2.924178000  | 0.101847000  |
| 1  | 2.378980000  | 2.216259000  | 0.623121000  |
| 6  | 1.807005000  | 4.264109000  | 0.818118000  |
| 1  | 2.801632000  | 4.700670000  | 0.682734000  |
| 1  | 1.089356000  | 4.994725000  | 0.430495000  |
| 1  | 1.643298000  | 4.179682000  | 1.895307000  |
| 6  | 2.166712000  | 3.024655000  | -1.353086000 |
| 1  | 3.222960000  | 3.303754000  | -1.420772000 |
| 1  | 2.037781000  | 2.081952000  | -1.896968000 |
| 1  | 1.603071000  | 3.791998000  | -1.894265000 |
| 15 | -2.414000000 | -0.816698000 | 0.239876000  |
| 15 | 0.041866000  | 2.108749000  | 0.154877000  |
| 15 | 2.366712000  | -1.144249000 | 0.025843000  |
| 7  | -0.135022000 | -0.681469000 | -3.427200000 |
| 7  | -0.087472000 | -0.574447000 | -2.310980000 |
| 1  | -0.131822000 | -1.997905000 | 0.296451000  |

[3b'<sub>psi</sub> -V-H]<sup>+</sup> (TE = -3392.492931)

|    |              |              |              |
|----|--------------|--------------|--------------|
| 23 | 0.228421000  | -0.447266000 | -0.574288000 |
| 14 | 0.224256000  | -0.555114000 | 2.161622000  |
| 6  | -0.205916000 | 1.207396000  | 2.706258000  |
| 6  | 0.287128000  | 2.294537000  | 1.746674000  |

|   |              |              |              |
|---|--------------|--------------|--------------|
| 6 | -1.719006000 | -2.648990000 | 1.506756000  |
| 6 | -1.017577000 | -1.904497000 | 2.652109000  |
| 6 | 2.017874000  | -0.951484000 | 2.613248000  |
| 6 | 2.809895000  | -1.648029000 | 1.509808000  |
| 1 | 2.332394000  | -2.597377000 | 1.230695000  |
| 1 | 3.822657000  | -1.904438000 | 1.840885000  |
| 1 | 2.502579000  | -0.005871000 | 2.891434000  |
| 1 | 2.021657000  | -1.560068000 | 3.527910000  |
| 1 | -2.602168000 | -3.186596000 | 1.873741000  |
| 1 | -1.047601000 | -3.421612000 | 1.108705000  |
| 1 | -1.756988000 | -1.437618000 | 3.312224000  |
| 1 | -0.490908000 | -2.632789000 | 3.281854000  |
| 1 | -1.287513000 | 1.296881000  | 2.853795000  |
| 1 | 0.232635000  | 1.365386000  | 3.702231000  |
| 1 | 1.383971000  | 2.278771000  | 1.681638000  |
| 1 | 0.021514000  | 3.293482000  | 2.110619000  |
| 6 | 4.014704000  | 0.792034000  | 0.450567000  |
| 1 | 3.329716000  | 1.542967000  | 0.871682000  |
| 6 | -3.797325000 | -0.810689000 | 0.479377000  |
| 1 | -3.890473000 | 0.030531000  | -0.220998000 |
| 6 | 0.432692000  | 3.365255000  | -0.994521000 |
| 1 | -0.151109000 | 3.346760000  | -1.923118000 |
| 6 | -3.773926000 | -0.261294000 | 1.903349000  |
| 1 | -4.610582000 | 0.427819000  | 2.057571000  |
| 1 | -3.885665000 | -1.067502000 | 2.635486000  |
| 1 | -2.860573000 | 0.281672000  | 2.154376000  |
| 6 | -5.032173000 | -1.687182000 | 0.315620000  |
| 1 | -5.223844000 | -1.969669000 | -0.719557000 |
| 1 | -4.971187000 | -2.602241000 | 0.912620000  |
| 1 | -5.912754000 | -1.137865000 | 0.665390000  |
| 6 | 0.356072000  | 4.757881000  | -0.382926000 |
| 1 | 0.924249000  | 4.822726000  | 0.550534000  |
| 1 | 0.791691000  | 5.492400000  | -1.068311000 |
| 1 | -0.665134000 | 5.081906000  | -0.175675000 |
| 6 | 1.863380000  | 2.999886000  | -1.348747000 |
| 1 | 2.287129000  | 3.727114000  | -2.048605000 |
| 1 | 2.508084000  | 3.004225000  | -0.464175000 |
| 1 | 1.925384000  | 2.012148000  | -1.815311000 |
| 6 | 4.696496000  | 1.411679000  | -0.767574000 |
| 1 | 5.122890000  | 2.384744000  | -0.504267000 |
| 1 | 5.523868000  | 0.790344000  | -1.118197000 |
| 1 | 4.026126000  | 1.569155000  | -1.612737000 |
| 6 | 5.049798000  | 0.461468000  | 1.521407000  |
| 1 | 5.639088000  | 1.356795000  | 1.745656000  |
| 1 | 4.610109000  | 0.127742000  | 2.463899000  |
| 1 | 5.754297000  | -0.306907000 | 1.194915000  |

|    |              |              |              |
|----|--------------|--------------|--------------|
| 7  | 0.926428000  | -3.367038000 | -1.553759000 |
| 7  | 0.667902000  | -2.342479000 | -1.181153000 |
| 1  | 0.239732000  | -0.125159000 | -2.260472000 |
| 15 | 2.866885000  | -0.616236000 | -0.024643000 |
| 15 | -2.154008000 | -1.608370000 | 0.034765000  |
| 15 | -0.339889000 | 2.016752000  | 0.027264000  |
| 6  | -2.503012000 | -2.878876000 | -1.293231000 |
| 1  | -1.500604000 | -3.271478000 | -1.485387000 |
| 6  | -3.355771000 | -4.093442000 | -0.931831000 |
| 1  | -4.425818000 | -3.890362000 | -0.936978000 |
| 1  | -3.183187000 | -4.878669000 | -1.675086000 |
| 1  | -3.101404000 | -4.521961000 | 0.041423000  |
| 6  | -2.958286000 | -2.192644000 | -2.576719000 |
| 1  | -3.085096000 | -2.929274000 | -3.375930000 |
| 1  | -3.919633000 | -1.680793000 | -2.462489000 |
| 1  | -2.227720000 | -1.455136000 | -2.923372000 |
| 6  | 3.790399000  | -1.738523000 | -1.196265000 |
| 1  | 3.219333000  | -2.670862000 | -1.097665000 |
| 6  | 3.664207000  | -1.274799000 | -2.643805000 |
| 1  | 3.996873000  | -2.063979000 | -3.325310000 |
| 1  | 2.632633000  | -1.018852000 | -2.906726000 |
| 1  | 4.283404000  | -0.397539000 | -2.848697000 |
| 6  | 5.228000000  | -2.073777000 | -0.817238000 |
| 1  | 5.605098000  | -2.863842000 | -1.475064000 |
| 1  | 5.904030000  | -1.223485000 | -0.932719000 |
| 1  | 5.324013000  | -2.442209000 | 0.207753000  |
| 6  | -2.169418000 | 2.395314000  | 0.174484000  |
| 1  | -2.526843000 | 1.420146000  | 0.520162000  |
| 6  | -2.557261000 | 3.405881000  | 1.249227000  |
| 1  | -2.131815000 | 4.398570000  | 1.091071000  |
| 1  | -3.646568000 | 3.526289000  | 1.263419000  |
| 1  | -2.265792000 | 3.088258000  | 2.253261000  |
| 6  | -2.934216000 | 2.639857000  | -1.151794000 |
| 1  | -3.985421000 | 2.441585000  | -0.879487000 |
| 6  | -2.899469000 | 4.073587000  | -1.667830000 |
| 1  | -1.917330000 | 4.366753000  | -2.047646000 |
| 1  | -3.599436000 | 4.185985000  | -2.500816000 |
| 1  | -3.192101000 | 4.802927000  | -0.907873000 |
| 6  | -2.563243000 | 1.654789000  | -2.250033000 |
| 1  | -2.582113000 | 0.618680000  | -1.899792000 |
| 1  | -3.254455000 | 1.730070000  | -3.094884000 |
| 1  | -1.555994000 | 1.822436000  | -2.646290000 |

$[3c'_{PB} - V - H]^+ (TE = -3049.312752)$

|   |              |             |             |
|---|--------------|-------------|-------------|
| 6 | -0.799021000 | 2.387736000 | 1.965503000 |
|---|--------------|-------------|-------------|

|    |              |              |              |
|----|--------------|--------------|--------------|
| 6  | 0.275235000  | 1.646571000  | 2.752525000  |
| 6  | -2.037821000 | -0.800902000 | 1.992389000  |
| 6  | -0.706625000 | -0.978078000 | 2.722827000  |
| 6  | 2.908519000  | 0.055526000  | 1.771973000  |
| 6  | 1.945211000  | -0.431811000 | 2.859306000  |
| 1  | -2.405242000 | 0.225978000  | 2.060129000  |
| 1  | -0.918089000 | -1.007914000 | 3.809356000  |
| 1  | 3.938723000  | -0.254978000 | 1.979062000  |
| 1  | 2.315118000  | -0.043181000 | 3.821382000  |
| 1  | -0.814702000 | 3.456437000  | 2.213954000  |
| 1  | 1.239001000  | 2.156014000  | 2.612932000  |
| 6  | -1.882442000 | 3.349520000  | -0.562995000 |
| 1  | -1.430581000 | 4.350463000  | -0.503669000 |
| 6  | -2.123502000 | -3.091552000 | 0.253033000  |
| 1  | -1.352259000 | -3.373450000 | 0.987978000  |
| 6  | 3.670238000  | 0.366883000  | -1.006942000 |
| 1  | 3.442582000  | 1.427319000  | -0.815041000 |
| 23 | 0.001315000  | -0.071899000 | -0.906482000 |
| 1  | -1.798509000 | 2.022813000  | 2.211706000  |
| 1  | 0.071282000  | 1.797256000  | 3.828729000  |
| 1  | 2.009904000  | -1.523901000 | 2.948134000  |
| 1  | 2.929575000  | 1.152379000  | 1.733266000  |
| 1  | -0.313211000 | -1.985753000 | 2.528128000  |
| 1  | -2.822459000 | -1.416061000 | 2.448287000  |
| 6  | 5.136421000  | 0.132916000  | -0.664947000 |
| 1  | 5.764468000  | 0.829605000  | -1.229181000 |
| 1  | 5.365515000  | 0.281221000  | 0.393088000  |
| 1  | 5.458548000  | -0.874260000 | -0.944348000 |
| 6  | 3.423154000  | 0.090803000  | -2.486634000 |
| 1  | 3.549263000  | -0.968857000 | -2.733205000 |
| 1  | 2.429721000  | 0.391978000  | -2.833642000 |
| 1  | 4.144417000  | 0.640637000  | -3.099015000 |
| 6  | -3.471782000 | -3.578867000 | 0.772724000  |
| 1  | -3.424524000 | -4.653188000 | 0.977341000  |
| 1  | -3.790416000 | -3.091625000 | 1.697314000  |
| 1  | -4.262006000 | -3.435531000 | 0.030284000  |
| 6  | -1.785014000 | -3.781054000 | -1.063582000 |
| 1  | -2.463691000 | -3.494209000 | -1.870744000 |
| 1  | -0.769831000 | -3.575203000 | -1.401355000 |
| 1  | -1.868574000 | -4.866242000 | -0.948462000 |
| 6  | -2.205945000 | 3.057111000  | -2.023009000 |
| 1  | -1.320397000 | 2.974411000  | -2.656036000 |
| 1  | -2.750456000 | 2.115135000  | -2.132714000 |
| 1  | -2.835687000 | 3.855490000  | -2.429167000 |
| 6  | -3.157922000 | 3.371140000  | 0.274427000  |
| 1  | -3.003497000 | 3.758131000  | 1.283679000  |



|    |              |              |              |
|----|--------------|--------------|--------------|
| 1  | -3.901471000 | 4.015035000  | -0.205090000 |
| 1  | -3.615794000 | 2.379653000  | 0.363747000  |
| 6  | 2.909225000  | -2.324828000 | 0.047633000  |
| 1  | 3.190420000  | -2.499978000 | -1.002141000 |
| 6  | 1.714007000  | -3.214186000 | 0.374129000  |
| 1  | 1.401215000  | -3.095018000 | 1.417035000  |
| 1  | 0.845638000  | -3.000168000 | -0.251757000 |
| 1  | 1.968923000  | -4.269736000 | 0.236395000  |
| 6  | 4.086833000  | -2.695330000 | 0.942546000  |
| 1  | 4.371497000  | -3.737762000 | 0.768100000  |
| 1  | 4.975911000  | -2.085879000 | 0.779310000  |
| 1  | 3.821910000  | -2.615952000 | 2.001558000  |
| 6  | -3.490307000 | -0.479183000 | -0.521293000 |
| 1  | -3.151447000 | 0.558076000  | -0.664911000 |
| 6  | -4.728995000 | -0.452806000 | 0.366263000  |
| 1  | -5.164501000 | -1.443519000 | 0.511352000  |
| 1  | -4.542569000 | -0.026182000 | 1.355340000  |
| 1  | -5.501351000 | 0.165193000  | -0.104382000 |
| 6  | -3.794983000 | -1.037405000 | -1.905346000 |
| 1  | -4.204228000 | -2.050972000 | -1.854164000 |
| 1  | -4.547148000 | -0.419007000 | -2.405390000 |
| 1  | -2.907948000 | -1.053752000 | -2.545797000 |
| 6  | 1.027982000  | 3.141829000  | -0.147385000 |
| 1  | 1.783483000  | 2.476684000  | 0.299502000  |
| 6  | 1.138791000  | 4.497727000  | 0.532785000  |
| 1  | 2.104544000  | 4.958273000  | 0.300469000  |
| 1  | 0.369340000  | 5.197641000  | 0.192554000  |
| 1  | 1.069718000  | 4.432416000  | 1.621522000  |
| 6  | 1.307909000  | 3.237616000  | -1.643952000 |
| 1  | 2.338706000  | 3.553972000  | -1.833358000 |
| 1  | 1.152896000  | 2.287731000  | -2.173111000 |
| 1  | 0.656187000  | 3.972517000  | -2.126065000 |
| 15 | -1.945303000 | -1.231972000 | 0.197436000  |
| 15 | -0.570797000 | 2.213831000  | 0.146228000  |
| 15 | 2.432968000  | -0.514031000 | 0.083560000  |
| 5  | 0.460004000  | 0.079008000  | 2.666496000  |
| 7  | 0.601529000  | -2.167217000 | -3.218771000 |
| 7  | 0.397438000  | -1.490603000 | -2.355512000 |
| 1  | -1.058959000 | 0.459518000  | -2.132529000 |

[3d'<sub>SC</sub> -V-H]<sup>+</sup> (TE = -2877.659849)

|   |             |              |              |
|---|-------------|--------------|--------------|
| 6 | 2.603126000 | 0.904081000  | -1.625859000 |
| 6 | 1.312628000 | 0.860954000  | -2.432378000 |
| 6 | 1.413477000 | -2.141261000 | -0.752496000 |
| 6 | 0.741989000 | -1.652344000 | -2.027692000 |

|    |              |              |              |
|----|--------------|--------------|--------------|
| 6  | -2.034051000 | 0.939569000  | -2.112389000 |
| 6  | -1.054348000 | -0.009511000 | -2.787633000 |
| 1  | 2.359950000  | -1.638994000 | -0.558723000 |
| 1  | 1.446597000  | -1.846524000 | -2.854975000 |
| 1  | -2.953809000 | 1.001229000  | -2.699783000 |
| 1  | -0.885570000 | 0.373439000  | -3.806442000 |
| 1  | 3.295862000  | 1.616122000  | -2.080978000 |
| 1  | 0.830545000  | 1.844969000  | -2.407751000 |
| 6  | 3.773933000  | 0.916086000  | 1.039473000  |
| 1  | 3.546327000  | 1.350755000  | 2.020987000  |
| 6  | -1.090043000 | -2.848372000 | 0.489129000  |
| 1  | -1.571287000 | -2.408614000 | -0.393902000 |
| 6  | -3.397556000 | 1.688957000  | 0.305437000  |
| 1  | -2.667940000 | 2.504124000  | 0.381856000  |
| 23 | -0.069735000 | 0.609506000  | 0.378110000  |
| 16 | 0.461993000  | -1.870162000 | 0.779731000  |
| 16 | 2.275160000  | 1.467202000  | 0.089910000  |
| 16 | -2.446992000 | 0.284363000  | -0.452161000 |
| 6  | 0.293269000  | -0.210267000 | -2.126405000 |
| 1  | 3.106745000  | -0.067008000 | -1.603901000 |
| 1  | 1.601416000  | 0.712742000  | -3.489160000 |
| 1  | -1.544719000 | -0.980742000 | -2.915614000 |
| 1  | -1.618860000 | 1.941909000  | -1.977655000 |
| 1  | -0.116535000 | -2.300676000 | -2.232525000 |
| 1  | 1.643834000  | -3.207526000 | -0.830950000 |
| 6  | -4.566886000 | 2.090025000  | -0.568485000 |
| 1  | -5.135027000 | 2.881811000  | -0.070673000 |
| 1  | -4.256083000 | 2.483860000  | -1.538306000 |
| 1  | -5.251384000 | 1.253692000  | -0.739263000 |
| 6  | -3.836273000 | 1.229068000  | 1.682557000  |
| 1  | -4.542920000 | 0.395703000  | 1.620731000  |
| 1  | -2.999327000 | 0.913945000  | 2.310662000  |
| 1  | -4.341366000 | 2.048214000  | 2.201477000  |
| 6  | -0.779092000 | -4.310098000 | 0.249385000  |
| 1  | -1.711862000 | -4.869787000 | 0.129518000  |
| 1  | -0.190297000 | -4.478030000 | -0.655922000 |
| 1  | -0.237331000 | -4.749448000 | 1.091742000  |
| 6  | -1.968884000 | -2.623404000 | 1.704318000  |
| 1  | -1.521138000 | -3.048298000 | 2.607381000  |
| 1  | -2.156288000 | -1.561405000 | 1.889693000  |
| 1  | -2.938678000 | -3.106720000 | 1.557557000  |
| 6  | 3.937713000  | -0.580588000 | 1.181358000  |
| 1  | 3.045070000  | -1.065579000 | 1.584937000  |
| 1  | 4.202270000  | -1.055857000 | 0.230764000  |
| 1  | 4.762742000  | -0.795134000 | 1.868147000  |
| 6  | 5.005826000  | 1.589180000  | 0.464041000  |

|   |              |             |              |
|---|--------------|-------------|--------------|
| 1 | 4.886467000  | 2.671171000 | 0.380103000  |
| 1 | 5.869502000  | 1.395952000 | 1.107161000  |
| 1 | 5.254237000  | 1.196436000 | -0.526940000 |
| 7 | -0.322112000 | 1.718749000 | 3.315558000  |
| 7 | -0.253445000 | 1.313760000 | 2.276598000  |
| 1 | -0.349897000 | 2.193175000 | -0.214718000 |

[3e'<sub>ssi</sub> -V-H]<sup>+</sup> (TE = -3129.075960)

|    |              |              |              |
|----|--------------|--------------|--------------|
| 23 | 0.078359000  | -0.285112000 | 1.029880000  |
| 16 | -2.320986000 | -1.218472000 | 0.621603000  |
| 16 | 2.605576000  | -0.794482000 | 0.877607000  |
| 16 | 0.368624000  | 1.927910000  | -0.170294000 |
| 14 | 0.331711000  | -0.998762000 | -1.616171000 |
| 6  | 0.350926000  | 0.646514000  | -2.551467000 |
| 6  | -0.381877000 | 1.770820000  | -1.831468000 |
| 6  | 2.590030000  | -2.198120000 | -0.305137000 |
| 6  | 1.993288000  | -1.898705000 | -1.674307000 |
| 6  | -1.268643000 | -1.955887000 | -1.919783000 |
| 6  | -1.953955000 | -2.472647000 | -0.664027000 |
| 1  | -1.326445000 | -3.197334000 | -0.133599000 |
| 1  | -2.889913000 | -2.991743000 | -0.888263000 |
| 1  | -1.943063000 | -1.285684000 | -2.468870000 |
| 1  | -1.079523000 | -2.799488000 | -2.598209000 |
| 1  | 3.613114000  | -2.579163000 | -0.375492000 |
| 1  | 2.012933000  | -2.965902000 | 0.220195000  |
| 1  | 2.681663000  | -1.271766000 | -2.255783000 |
| 1  | 1.908026000  | -2.836992000 | -2.237400000 |
| 1  | 1.389900000  | 0.944668000  | -2.736210000 |
| 1  | -0.099201000 | 0.499020000  | -3.542266000 |
| 1  | -1.453082000 | 1.564722000  | -1.731197000 |
| 1  | -0.270247000 | 2.725618000  | -2.352378000 |
| 6  | -3.660532000 | -0.150494000 | -0.111204000 |
| 1  | -3.157093000 | 0.645018000  | -0.673991000 |
| 6  | 3.569080000  | 0.511999000  | -0.016350000 |
| 1  | 2.943674000  | 0.844112000  | -0.856038000 |
| 6  | -0.541434000 | 3.322083000  | 0.639664000  |
| 1  | 0.013521000  | 3.394995000  | 1.583017000  |
| 6  | 4.889398000  | -0.032391000 | -0.519752000 |
| 1  | 5.464794000  | 0.775911000  | -0.981301000 |
| 1  | 5.493086000  | -0.439588000 | 0.296438000  |
| 1  | 4.772420000  | -0.813007000 | -1.275548000 |
| 6  | 3.748702000  | 1.653579000  | 0.966993000  |
| 1  | 2.799833000  | 2.001883000  | 1.383183000  |
| 1  | 4.391495000  | 1.358075000  | 1.800782000  |
| 1  | 4.222450000  | 2.502335000  | 0.465813000  |

|   |              |              |              |
|---|--------------|--------------|--------------|
| 6 | -0.373995000 | 4.599929000  | -0.158385000 |
| 1 | -0.935422000 | 4.572097000  | -1.097079000 |
| 1 | -0.765403000 | 5.443716000  | 0.417461000  |
| 1 | 0.671663000  | 4.813879000  | -0.390265000 |
| 6 | -1.981597000 | 2.969673000  | 0.928731000  |
| 1 | -2.468624000 | 3.785619000  | 1.471865000  |
| 1 | -2.557627000 | 2.810394000  | 0.010497000  |
| 1 | -2.045199000 | 2.072522000  | 1.547122000  |
| 6 | -4.415523000 | 0.439573000  | 1.067079000  |
| 1 | -5.108242000 | 1.210709000  | 0.716975000  |
| 1 | -5.000577000 | -0.330608000 | 1.576848000  |
| 1 | -3.759738000 | 0.898105000  | 1.809195000  |
| 6 | -4.581059000 | -0.934446000 | -1.022791000 |
| 1 | -5.397743000 | -0.283611000 | -1.349594000 |
| 1 | -4.090540000 | -1.307839000 | -1.924385000 |
| 1 | -5.035575000 | -1.782835000 | -0.502675000 |
| 7 | 0.193145000  | -2.895541000 | 2.846389000  |
| 7 | 0.136821000  | -1.995414000 | 2.190362000  |
| 1 | -0.099559000 | 0.530910000  | 2.523623000  |

$[3\mathbf{f}_{SB} - \mathbf{V} - \mathbf{H}]^+$  (TE = -2864.458604)

|    |              |              |              |
|----|--------------|--------------|--------------|
| 6  | -0.691616000 | 2.508939000  | -1.337973000 |
| 6  | -0.535856000 | 1.595595000  | -2.554081000 |
| 6  | 2.572999000  | 1.234067000  | -1.242282000 |
| 6  | 1.933652000  | 0.410234000  | -2.353310000 |
| 6  | -1.764086000 | -1.373789000 | -1.924358000 |
| 6  | -0.276394000 | -1.130020000 | -2.188134000 |
| 1  | 2.117183000  | 2.222514000  | -1.138638000 |
| 1  | 2.204503000  | 0.890685000  | -3.306760000 |
| 1  | -2.186268000 | -2.146169000 | -2.571304000 |
| 1  | -0.035125000 | -1.450774000 | -3.221997000 |
| 1  | -1.455190000 | 3.273474000  | -1.502181000 |
| 1  | -1.538350000 | 1.324475000  | -2.908368000 |
| 6  | -1.075106000 | 2.673758000  | 1.535819000  |
| 1  | -1.524074000 | 2.067817000  | 2.331505000  |
| 6  | 3.637174000  | -0.923095000 | 0.385585000  |
| 1  | 3.144984000  | -1.736867000 | -0.161646000 |
| 6  | -3.569185000 | -1.065340000 | 0.300104000  |
| 1  | -3.494657000 | -0.057051000 | -0.122832000 |
| 23 | 0.124173000  | -0.608548000 | 0.452374000  |
| 16 | 2.429595000  | 0.498747000  | 0.428599000  |
| 16 | -1.210666000 | 1.503272000  | 0.101306000  |
| 16 | -1.979660000 | -1.893743000 | -0.177609000 |
| 1  | 0.240050000  | 3.022679000  | -1.087530000 |
| 1  | -0.094192000 | 2.203476000  | -3.355042000 |

|   |              |              |              |
|---|--------------|--------------|--------------|
| 1 | 0.348711000  | -1.864500000 | -1.641657000 |
| 1 | -2.356940000 | -0.463469000 | -2.062248000 |
| 1 | 2.409590000  | -0.580208000 | -2.381756000 |
| 1 | 3.636900000  | 1.416149000  | -1.411302000 |
| 6 | -4.740805000 | -1.813452000 | -0.301129000 |
| 1 | -5.674756000 | -1.301589000 | -0.048535000 |
| 1 | -4.686552000 | -1.870940000 | -1.391516000 |
| 1 | -4.808815000 | -2.833396000 | 0.087064000  |
| 6 | -3.608822000 | -0.987860000 | 1.812118000  |
| 1 | -3.619389000 | -1.981919000 | 2.269263000  |
| 1 | -2.750571000 | -0.443070000 | 2.216276000  |
| 1 | -4.521215000 | -0.476058000 | 2.131555000  |
| 6 | 4.929956000  | -0.553910000 | -0.308647000 |
| 1 | 5.647223000  | -1.371201000 | -0.186918000 |
| 1 | 4.810074000  | -0.395269000 | -1.382600000 |
| 1 | 5.382888000  | 0.342350000  | 0.126164000  |
| 6 | 3.856223000  | -1.313217000 | 1.837077000  |
| 1 | 4.447373000  | -0.554502000 | 2.356966000  |
| 1 | 2.924052000  | -1.436688000 | 2.393813000  |
| 1 | 4.403429000  | -2.258586000 | 1.892958000  |
| 6 | 0.358231000  | 2.994547000  | 1.893637000  |
| 1 | 0.912398000  | 2.096982000  | 2.171272000  |
| 1 | 0.887938000  | 3.494982000  | 1.075269000  |
| 1 | 0.379280000  | 3.679506000  | 2.747111000  |
| 6 | -1.924383000 | 3.902259000  | 1.274634000  |
| 1 | -2.947005000 | 3.651327000  | 0.983389000  |
| 1 | -1.977152000 | 4.507492000  | 2.184238000  |
| 1 | -1.493009000 | 4.539695000  | 0.497126000  |
| 5 | 0.356698000  | 0.315105000  | -2.296953000 |
| 7 | 1.182983000  | -3.469679000 | 1.370825000  |
| 7 | 0.862710000  | -2.459338000 | 1.029137000  |
| 1 | -0.132821000 | -0.271855000 | 2.088198000  |

[3a''<sub>PC</sub> -V-H]<sup>+</sup> (TE = -3129.075960)

|   |              |              |             |
|---|--------------|--------------|-------------|
| 6 | -0.766966000 | -1.106788000 | 1.763028000 |
| 6 | -0.241280000 | -1.933479000 | 2.779677000 |
| 1 | 0.730196000  | -1.690601000 | 3.203450000 |
| 6 | -0.964093000 | -2.994175000 | 3.303406000 |
| 1 | -0.539080000 | -3.590930000 | 4.106509000 |
| 6 | -2.239008000 | -3.268670000 | 2.821919000 |
| 1 | -2.821109000 | -4.087702000 | 3.236458000 |
| 6 | -2.752264000 | -2.512966000 | 1.767644000 |
| 1 | -3.711599000 | -2.799534000 | 1.343865000 |
| 6 | -2.040496000 | -1.459072000 | 1.202468000 |
| 6 | 1.392036000  | 0.247511000  | 1.817495000 |

|    |              |              |              |
|----|--------------|--------------|--------------|
| 6  | 1.720352000  | 1.111183000  | 2.876766000  |
| 1  | 0.931593000  | 1.683504000  | 3.358680000  |
| 6  | 3.023137000  | 1.235186000  | 3.339482000  |
| 1  | 3.239132000  | 1.908135000  | 4.165534000  |
| 6  | 4.041191000  | 0.499052000  | 2.747039000  |
| 1  | 5.066155000  | 0.590072000  | 3.097243000  |
| 6  | 3.741919000  | -0.344345000 | 1.682552000  |
| 1  | 4.550938000  | -0.886492000 | 1.202340000  |
| 6  | 2.438188000  | -0.478048000 | 1.199037000  |
| 6  | -0.779241000 | 1.414742000  | 1.548162000  |
| 6  | -1.603066000 | 1.609227000  | 2.664192000  |
| 1  | -1.809082000 | 0.767058000  | 3.322717000  |
| 6  | -2.121957000 | 2.864286000  | 2.959549000  |
| 1  | -2.752930000 | 2.995550000  | 3.835197000  |
| 6  | -1.827785000 | 3.946215000  | 2.139683000  |
| 1  | -2.227884000 | 4.931344000  | 2.365425000  |
| 6  | -1.020819000 | 3.765930000  | 1.017990000  |
| 1  | -0.808369000 | 4.617846000  | 0.379415000  |
| 6  | -0.494019000 | 2.513477000  | 0.703759000  |
| 6  | -0.046115000 | 0.124843000  | 1.422281000  |
| 23 | -0.103744000 | -0.350037000 | -1.082366000 |
| 6  | -3.191712000 | -2.356192000 | -1.334041000 |
| 1  | -4.045082000 | -2.662689000 | -0.717752000 |
| 6  | 3.608774000  | -1.101527000 | -1.423325000 |
| 1  | 3.930217000  | -0.087161000 | -1.139459000 |
| 6  | -0.272626000 | 3.170480000  | -2.225983000 |
| 1  | 0.241699000  | 2.719337000  | -3.089926000 |
| 6  | 0.010658000  | 4.668334000  | -2.259580000 |
| 1  | -0.345909000 | 5.082242000  | -3.208674000 |
| 1  | -0.511468000 | 5.215200000  | -1.470945000 |
| 1  | 1.070857000  | 4.912019000  | -2.187184000 |
| 6  | -1.765745000 | 2.900096000  | -2.381174000 |
| 1  | -2.337347000 | 3.332513000  | -1.553186000 |
| 1  | -2.139443000 | 3.357111000  | -3.302516000 |
| 1  | -2.002023000 | 1.831710000  | -2.422685000 |
| 6  | -3.720510000 | -1.965025000 | -2.712079000 |
| 1  | -4.543025000 | -1.247139000 | -2.674230000 |
| 1  | -2.934198000 | -1.535324000 | -3.341167000 |
| 1  | -4.094768000 | -2.850547000 | -3.234756000 |
| 6  | -2.259234000 | -3.552312000 | -1.441311000 |
| 1  | -1.768318000 | -3.800853000 | -0.495967000 |
| 1  | -2.837574000 | -4.427399000 | -1.758998000 |
| 1  | -1.473535000 | -3.390393000 | -2.182787000 |
| 6  | 4.780087000  | -2.056647000 | -1.220398000 |
| 1  | 5.625517000  | -1.733442000 | -1.836616000 |
| 1  | 5.138170000  | -2.113777000 | -0.191591000 |

|    |              |              |              |
|----|--------------|--------------|--------------|
| 1  | 4.534545000  | -3.073617000 | -1.536499000 |
| 6  | 3.208382000  | -1.074833000 | -2.896761000 |
| 1  | 2.802484000  | -2.036645000 | -3.228273000 |
| 1  | 2.452962000  | -0.313743000 | -3.106596000 |
| 1  | 4.078440000  | -0.859337000 | -3.525180000 |
| 15 | 0.426705000  | 2.134742000  | -0.833736000 |
| 15 | 2.074596000  | -1.347815000 | -0.371931000 |
| 15 | -2.492948000 | -0.834471000 | -0.478157000 |
| 6  | 1.897184000  | -3.151268000 | 0.074212000  |
| 1  | 0.921554000  | -3.131030000 | 0.581346000  |
| 6  | 1.732700000  | -3.993832000 | -1.184783000 |
| 1  | 2.667303000  | -4.093215000 | -1.744651000 |
| 1  | 1.411010000  | -5.007166000 | -0.924033000 |
| 1  | 0.977488000  | -3.573134000 | -1.855845000 |
| 6  | 2.922979000  | -3.723478000 | 1.040888000  |
| 1  | 2.591221000  | -4.708214000 | 1.387032000  |
| 1  | 3.904317000  | -3.866386000 | 0.583537000  |
| 1  | 3.055827000  | -3.099135000 | 1.929414000  |
| 6  | -4.073918000 | 0.186310000  | -0.383961000 |
| 1  | -4.210725000 | 0.474383000  | -1.437086000 |
| 6  | -3.932005000 | 1.461089000  | 0.426464000  |
| 1  | -3.908217000 | 1.243956000  | 1.496844000  |
| 1  | -3.033689000 | 2.028980000  | 0.180638000  |
| 1  | -4.794033000 | 2.113202000  | 0.251231000  |
| 6  | -5.313950000 | -0.571145000 | 0.078720000  |
| 1  | -6.167388000 | 0.113671000  | 0.120502000  |
| 1  | -5.604480000 | -1.393114000 | -0.577578000 |
| 1  | -5.187441000 | -0.971435000 | 1.090339000  |
| 6  | 2.184548000  | 2.700344000  | -0.551508000 |
| 1  | 2.597226000  | 1.878204000  | 0.049121000  |
| 6  | 2.348699000  | 3.976809000  | 0.261545000  |
| 1  | 3.411002000  | 4.163302000  | 0.451731000  |
| 1  | 1.955379000  | 4.861094000  | -0.246335000 |
| 1  | 1.854178000  | 3.907001000  | 1.234119000  |
| 6  | 2.947525000  | 2.725254000  | -1.871860000 |
| 1  | 4.020886000  | 2.837503000  | -1.689024000 |
| 1  | 2.811277000  | 1.803474000  | -2.447250000 |
| 1  | 2.647456000  | 3.556876000  | -2.514885000 |
| 7  | -0.273328000 | -0.794132000 | -4.187028000 |
| 7  | -0.208462000 | -0.634512000 | -3.078649000 |
| 1  | -0.406280000 | -1.990002000 | -0.826693000 |

**[3b''<sub>PSi</sub> -V-H]<sup>+</sup>** (TE = -3771.189715)

|   |             |             |             |
|---|-------------|-------------|-------------|
| 6 | 0.626401000 | 1.579064000 | 2.008885000 |
| 6 | 1.217002000 | 1.746449000 | 3.268039000 |

|    |              |              |              |
|----|--------------|--------------|--------------|
| 1  | 1.434319000  | 0.877107000  | 3.889575000  |
| 6  | 1.558295000  | 3.013342000  | 3.729212000  |
| 1  | 2.025957000  | 3.130469000  | 4.703799000  |
| 6  | 1.311266000  | 4.128769000  | 2.934721000  |
| 1  | 1.580415000  | 5.120755000  | 3.289180000  |
| 6  | 0.733213000  | 3.977311000  | 1.678370000  |
| 1  | 0.564941000  | 4.859372000  | 1.064114000  |
| 6  | 0.393795000  | 2.707725000  | 1.204882000  |
| 6  | -1.604162000 | -0.508194000 | 2.065512000  |
| 6  | -1.893185000 | -0.230886000 | 3.407733000  |
| 1  | -1.129934000 | 0.208888000  | 4.050378000  |
| 6  | -3.156697000 | -0.475905000 | 3.933824000  |
| 1  | -3.368133000 | -0.246389000 | 4.975403000  |
| 6  | -4.150567000 | -0.997381000 | 3.114222000  |
| 1  | -5.146543000 | -1.179128000 | 3.510773000  |
| 6  | -3.879890000 | -1.277959000 | 1.778620000  |
| 1  | -4.679735000 | -1.669967000 | 1.159305000  |
| 6  | -2.613458000 | -1.036970000 | 1.239262000  |
| 6  | 1.333889000  | -1.473245000 | 1.740329000  |
| 6  | 1.235142000  | -2.232940000 | 2.913387000  |
| 1  | 0.470378000  | -1.993434000 | 3.652967000  |
| 6  | 2.077945000  | -3.315112000 | 3.134969000  |
| 1  | 1.989250000  | -3.899328000 | 4.047697000  |
| 6  | 3.016916000  | -3.661274000 | 2.169378000  |
| 1  | 3.664083000  | -4.521785000 | 2.320995000  |
| 6  | 3.126281000  | -2.916773000 | 0.999215000  |
| 1  | 3.858243000  | -3.218875000 | 0.256848000  |
| 6  | 2.297188000  | -1.815477000 | 0.771320000  |
| 23 | -0.056803000 | -0.083069000 | -1.241386000 |
| 6  | -2.004219000 | 3.146580000  | -0.376888000 |
| 1  | -1.864804000 | 4.219714000  | -0.192507000 |
| 6  | -2.026482000 | -3.202487000 | -0.574673000 |
| 1  | -3.009520000 | -3.565774000 | -0.241179000 |
| 6  | 3.856488000  | 0.325060000  | -0.528826000 |
| 1  | 4.247424000  | 0.439337000  | -1.551258000 |
| 6  | 4.952712000  | -0.230081000 | 0.372047000  |
| 1  | 5.809903000  | 0.451732000  | 0.378322000  |
| 1  | 4.602333000  | -0.315686000 | 1.405759000  |
| 1  | 5.322526000  | -1.210189000 | 0.071522000  |
| 6  | 3.435426000  | 1.696952000  | -0.030918000 |
| 1  | 3.087561000  | 1.660309000  | 1.005357000  |
| 1  | 4.279272000  | 2.394152000  | -0.062360000 |
| 1  | 2.631980000  | 2.121152000  | -0.634526000 |
| 6  | -2.728230000 | 2.944765000  | -1.700435000 |
| 1  | -2.153950000 | 3.274482000  | -2.571760000 |
| 1  | -2.958928000 | 1.885557000  | -1.846891000 |



|    |              |              |              |
|----|--------------|--------------|--------------|
| 1  | -3.678424000 | 3.487664000  | -1.712400000 |
| 6  | -2.804385000 | 2.557731000  | 0.773856000  |
| 1  | -2.307070000 | 2.670789000  | 1.741582000  |
| 1  | -3.779154000 | 3.050843000  | 0.845038000  |
| 1  | -2.994854000 | 1.490830000  | 0.623797000  |
| 6  | -1.751614000 | -3.717804000 | -1.980897000 |
| 1  | -1.717115000 | -4.812025000 | -1.978610000 |
| 1  | -2.509871000 | -3.422211000 | -2.709989000 |
| 1  | -0.783039000 | -3.357850000 | -2.342088000 |
| 6  | -0.972735000 | -3.702484000 | 0.400546000  |
| 1  | 0.026527000  | -3.369180000 | 0.104297000  |
| 1  | -1.150478000 | -3.367892000 | 1.426953000  |
| 1  | -0.963687000 | -4.797286000 | 0.411119000  |
| 14 | 0.103086000  | -0.110906000 | 1.392202000  |
| 15 | -2.188577000 | -1.340870000 | -0.527805000 |
| 15 | 2.372473000  | -0.811329000 | -0.770636000 |
| 15 | -0.284668000 | 2.429125000  | -0.476689000 |
| 6  | 0.677371000  | 3.683782000  | -1.525491000 |
| 1  | 1.593543000  | 3.828870000  | -0.938679000 |
| 6  | 0.020831000  | 5.049732000  | -1.692417000 |
| 1  | 0.704872000  | 5.713808000  | -2.230452000 |
| 1  | -0.899932000 | 5.005893000  | -2.279884000 |
| 1  | -0.217482000 | 5.541023000  | -0.746355000 |
| 6  | 1.071094000  | 3.109814000  | -2.880189000 |
| 1  | 1.613507000  | 2.161422000  | -2.794562000 |
| 1  | 0.199327000  | 2.936267000  | -3.518582000 |
| 1  | 1.721077000  | 3.810733000  | -3.413261000 |
| 6  | 2.953143000  | -2.012856000 | -2.101043000 |
| 1  | 2.434240000  | -2.943175000 | -1.826882000 |
| 6  | 2.439757000  | -1.570270000 | -3.466607000 |
| 1  | 2.752915000  | -0.549141000 | -3.717705000 |
| 1  | 2.835599000  | -2.224130000 | -4.249667000 |
| 1  | 1.353072000  | -1.615758000 | -3.518783000 |
| 6  | 4.452207000  | -2.280028000 | -2.190472000 |
| 1  | 5.021887000  | -1.378108000 | -2.433570000 |
| 1  | 4.890054000  | -2.710440000 | -1.290030000 |
| 1  | 4.639068000  | -2.992115000 | -3.000438000 |
| 6  | -3.790208000 | -1.013682000 | -1.470044000 |
| 1  | -4.210642000 | -0.142125000 | -0.943825000 |
| 6  | -4.820867000 | -2.141447000 | -1.454280000 |
| 1  | -5.759672000 | -1.778064000 | -1.884091000 |
| 1  | -4.502859000 | -2.987140000 | -2.069514000 |
| 1  | -5.055057000 | -2.535770000 | -0.465252000 |
| 6  | -3.516378000 | -0.615438000 | -2.917038000 |
| 1  | -2.898907000 | 0.278077000  | -3.002779000 |
| 1  | -3.013675000 | -1.412646000 | -3.473611000 |

|   |              |              |              |
|---|--------------|--------------|--------------|
| 1 | -4.458537000 | -0.410302000 | -3.435011000 |
| 7 | -0.472406000 | 0.343421000  | -4.348333000 |
| 7 | -0.311300000 | 0.175445000  | -3.252572000 |
| 1 | 0.278779000  | -1.746334000 | -1.452614000 |

[3c''<sub>PB</sub> -V-H]<sup>+</sup> (TE = -3506.554073)

|    |              |              |              |
|----|--------------|--------------|--------------|
| 6  | 1.579313000  | -1.030844000 | 1.691869000  |
| 6  | 1.740253000  | -1.962445000 | 2.732313000  |
| 1  | 0.854973000  | -2.376495000 | 3.211600000  |
| 6  | 2.991176000  | -2.365667000 | 3.184916000  |
| 1  | 3.068117000  | -3.085359000 | 3.996770000  |
| 6  | 4.139308000  | -1.848312000 | 2.597818000  |
| 1  | 5.124239000  | -2.150887000 | 2.944918000  |
| 6  | 4.016944000  | -0.954597000 | 1.540192000  |
| 1  | 4.919171000  | -0.580491000 | 1.062332000  |
| 6  | 2.761708000  | -0.550850000 | 1.077095000  |
| 6  | -0.185434000 | 1.026003000  | 1.805134000  |
| 6  | 0.505533000  | 1.413389000  | 2.977895000  |
| 1  | 1.330180000  | 0.797788000  | 3.329519000  |
| 6  | 0.137208000  | 2.515999000  | 3.734350000  |
| 1  | 0.680265000  | 2.750093000  | 4.647050000  |
| 6  | -0.927153000 | 3.312369000  | 3.326805000  |
| 1  | -1.232923000 | 4.172852000  | 3.916852000  |
| 6  | -1.590865000 | 3.003398000  | 2.148145000  |
| 1  | -2.405969000 | 3.643562000  | 1.819085000  |
| 6  | -1.241029000 | 1.884908000  | 1.383504000  |
| 6  | -1.074733000 | -1.532900000 | 1.623427000  |
| 6  | -1.635156000 | -1.743429000 | 2.890881000  |
| 1  | -1.331984000 | -1.109165000 | 3.724925000  |
| 6  | -2.573884000 | -2.746287000 | 3.103618000  |
| 1  | -3.004480000 | -2.887633000 | 4.092557000  |
| 6  | -2.960769000 | -3.574264000 | 2.052654000  |
| 1  | -3.685430000 | -4.367550000 | 2.219307000  |
| 6  | -2.430685000 | -3.376405000 | 0.783165000  |
| 1  | -2.754811000 | -4.017099000 | -0.031299000 |
| 6  | -1.508074000 | -2.346398000 | 0.561642000  |
| 23 | 0.143057000  | 0.473723000  | -1.000810000 |
| 6  | 3.438070000  | 2.071912000  | -0.114570000 |
| 1  | 4.490619000  | 1.834724000  | 0.091866000  |
| 6  | -3.819337000 | 1.266383000  | 0.087459000  |
| 1  | -4.180068000 | 2.199356000  | 0.543878000  |
| 6  | 0.295106000  | -3.239412000 | -1.600231000 |
| 1  | 0.610584000  | -2.928522000 | -2.605429000 |
| 6  | -0.456246000 | -4.561594000 | -1.690470000 |
| 1  | 0.178236000  | -5.318073000 | -2.163554000 |

|    |              |              |              |
|----|--------------|--------------|--------------|
| 1  | -0.712194000 | -4.940200000 | -0.696768000 |
| 1  | -1.377563000 | -4.505167000 | -2.275059000 |
| 6  | 1.528799000  | -3.392611000 | -0.725575000 |
| 1  | 1.263987000  | -3.646942000 | 0.306358000  |
| 1  | 2.167303000  | -4.196394000 | -1.105861000 |
| 1  | 2.126005000  | -2.480525000 | -0.690238000 |
| 6  | 3.360644000  | 2.980953000  | -1.336127000 |
| 1  | 3.660093000  | 2.495429000  | -2.269012000 |
| 1  | 2.343888000  | 3.360885000  | -1.477639000 |
| 1  | 4.007636000  | 3.853524000  | -1.203682000 |
| 6  | 2.855276000  | 2.763398000  | 1.105868000  |
| 1  | 2.948416000  | 2.159029000  | 2.011094000  |
| 1  | 3.374851000  | 3.710312000  | 1.285143000  |
| 1  | 1.792611000  | 2.998811000  | 0.973076000  |
| 6  | -4.577320000 | 1.025686000  | -1.212947000 |
| 1  | -5.656444000 | 1.051833000  | -1.033338000 |
| 1  | -4.361778000 | 1.765116000  | -1.989622000 |
| 1  | -4.348531000 | 0.041219000  | -1.627972000 |
| 6  | -4.034821000 | 0.142210000  | 1.085182000  |
| 1  | -3.699414000 | -0.823058000 | 0.696455000  |
| 1  | -3.510628000 | 0.315496000  | 2.028470000  |
| 1  | -5.101776000 | 0.047994000  | 1.311623000  |
| 5  | 0.105699000  | -0.497775000 | 1.422994000  |
| 15 | 2.623784000  | 0.428809000  | -0.463155000 |
| 15 | -2.021378000 | 1.623057000  | -0.248232000 |
| 15 | -0.766618000 | -1.825021000 | -1.024129000 |
| 6  | -2.074404000 | 3.328755000  | -1.060559000 |
| 1  | -2.084222000 | 3.069954000  | -2.129605000 |
| 6  | -0.800532000 | 4.124415000  | -0.781232000 |
| 1  | -0.672782000 | 4.912566000  | -1.529532000 |
| 1  | -0.838767000 | 4.606701000  | 0.198783000  |
| 1  | 0.109345000  | 3.517689000  | -0.792924000 |
| 6  | -3.297925000 | 4.199745000  | -0.794828000 |
| 1  | -3.212749000 | 5.124696000  | -1.374423000 |
| 1  | -4.240586000 | 3.732386000  | -1.083767000 |
| 1  | -3.383714000 | 4.499468000  | 0.253372000  |
| 6  | 3.815837000  | -0.415572000 | -1.661433000 |
| 1  | 3.816744000  | -1.455734000 | -1.309667000 |
| 6  | 5.255464000  | 0.088316000  | -1.628075000 |
| 1  | 5.871430000  | -0.540838000 | -2.278231000 |
| 1  | 5.346902000  | 1.110560000  | -2.005378000 |
| 1  | 5.714464000  | 0.061448000  | -0.637906000 |
| 6  | 3.286642000  | -0.398570000 | -3.091157000 |
| 1  | 3.951884000  | -0.971596000 | -3.744892000 |
| 1  | 2.284007000  | -0.824385000 | -3.167664000 |
| 1  | 3.241718000  | 0.616934000  | -3.499341000 |

|   |              |              |              |
|---|--------------|--------------|--------------|
| 6 | -2.110872000 | -1.663203000 | -2.340506000 |
| 1 | -2.331684000 | -0.585978000 | -2.301144000 |
| 6 | -1.578926000 | -1.959861000 | -3.739014000 |
| 1 | -1.396700000 | -3.026960000 | -3.894075000 |
| 1 | -2.319760000 | -1.653999000 | -4.484304000 |
| 1 | -0.653093000 | -1.422620000 | -3.958329000 |
| 6 | -3.414005000 | -2.409360000 | -2.088086000 |
| 1 | -3.295415000 | -3.494242000 | -2.159734000 |
| 1 | -3.856283000 | -2.188177000 | -1.114082000 |
| 1 | -4.147244000 | -2.125503000 | -2.851018000 |
| 7 | 0.497265000  | 2.398076000  | -3.514903000 |
| 7 | 0.401006000  | 1.806194000  | -2.574675000 |
| 1 | 0.385110000  | -0.437696000 | -2.390830000 |

**[3d''<sub>sc</sub> -V-H]<sup>+</sup> (TE = -3334.919534)**

|   |              |              |              |
|---|--------------|--------------|--------------|
| 6 | 1.161305000  | 1.029294000  | 1.024803000  |
| 6 | 2.193852000  | 1.019144000  | 1.975992000  |
| 1 | 2.413578000  | 0.092189000  | 2.503402000  |
| 6 | 2.872908000  | 2.184865000  | 2.305656000  |
| 1 | 3.649033000  | 2.159353000  | 3.066240000  |
| 6 | 2.544625000  | 3.386682000  | 1.681691000  |
| 1 | 3.067598000  | 4.301853000  | 1.945823000  |
| 6 | 1.584956000  | 3.404928000  | 0.676246000  |
| 1 | 1.393712000  | 4.319817000  | 0.120182000  |
| 6 | 0.909285000  | 2.234234000  | 0.339831000  |
| 6 | -1.055480000 | 0.087018000  | 1.633034000  |
| 6 | -1.015439000 | 0.609045000  | 2.937685000  |
| 1 | -0.054284000 | 0.897856000  | 3.357240000  |
| 6 | -2.157862000 | 0.715488000  | 3.715807000  |
| 1 | -2.084707000 | 1.101728000  | 4.729032000  |
| 6 | -3.390785000 | 0.323468000  | 3.201094000  |
| 1 | -4.292248000 | 0.406444000  | 3.802158000  |
| 6 | -3.470373000 | -0.132951000 | 1.894034000  |
| 1 | -4.437775000 | -0.370843000 | 1.457529000  |
| 6 | -2.318306000 | -0.249055000 | 1.113317000  |
| 6 | 0.840272000  | -1.475684000 | 1.006294000  |
| 6 | 0.406923000  | -2.382715000 | 1.998981000  |
| 1 | -0.420706000 | -2.096787000 | 2.642677000  |
| 6 | 1.052838000  | -3.587765000 | 2.213046000  |
| 1 | 0.710786000  | -4.247332000 | 3.006304000  |
| 6 | 2.142773000  | -3.947957000 | 1.424636000  |
| 1 | 2.647921000  | -4.897017000 | 1.582054000  |
| 6 | 2.550786000  | -3.109874000 | 0.390033000  |
| 1 | 3.330850000  | -3.434677000 | -0.293230000 |
| 6 | 1.920020000  | -1.892213000 | 0.169241000  |

|    |              |              |              |
|----|--------------|--------------|--------------|
| 16 | 2.207462000  | -1.080574000 | -1.403631000 |
| 16 | -0.040851000 | 2.132824000  | -1.156154000 |
| 16 | -2.525377000 | -0.597968000 | -0.624384000 |
| 23 | -0.226090000 | -0.405099000 | -1.479719000 |
| 6  | -1.465690000 | 3.327446000  | -0.985218000 |
| 1  | -0.984775000 | 4.310600000  | -1.048152000 |
| 6  | -3.212310000 | -2.341048000 | -0.670347000 |
| 1  | -4.227884000 | -2.214881000 | -0.276013000 |
| 6  | 3.840031000  | -0.125049000 | -1.344589000 |
| 1  | 4.281070000  | -0.472016000 | -2.285610000 |
| 6  | 4.702578000  | -0.573046000 | -0.188358000 |
| 1  | 5.665817000  | -0.055453000 | -0.239820000 |
| 1  | 4.247492000  | -0.321512000 | 0.774094000  |
| 1  | 4.907503000  | -1.645185000 | -0.198379000 |
| 6  | 3.653341000  | 1.373363000  | -1.403061000 |
| 1  | 3.379382000  | 1.784895000  | -0.431638000 |
| 1  | 4.600552000  | 1.839136000  | -1.696215000 |
| 1  | 2.902435000  | 1.679434000  | -2.136485000 |
| 6  | -2.338308000 | 3.102622000  | -2.204250000 |
| 1  | -1.788242000 | 3.222195000  | -3.141158000 |
| 1  | -2.784788000 | 2.102775000  | -2.193255000 |
| 1  | -3.157488000 | 3.826967000  | -2.208606000 |
| 6  | -2.206467000 | 3.185790000  | 0.322856000  |
| 1  | -1.542300000 | 3.236040000  | 1.190091000  |
| 1  | -2.931471000 | 4.000901000  | 0.417050000  |
| 1  | -2.762137000 | 2.246548000  | 0.369761000  |
| 6  | -3.265059000 | -2.740030000 | -2.130278000 |
| 1  | -3.774558000 | -3.702965000 | -2.225953000 |
| 1  | -3.809880000 | -2.017708000 | -2.744675000 |
| 1  | -2.255930000 | -2.854993000 | -2.535716000 |
| 6  | -2.419744000 | -3.296435000 | 0.187156000  |
| 1  | -1.387064000 | -3.371598000 | -0.164846000 |
| 1  | -2.412142000 | -3.000254000 | 1.239533000  |
| 1  | -2.871355000 | -4.292372000 | 0.131013000  |
| 6  | 0.249516000  | -0.141542000 | 0.931498000  |
| 7  | -0.920756000 | -0.425429000 | -4.552457000 |
| 7  | -0.645557000 | -0.420347000 | -3.469986000 |
| 1  | -0.236667000 | -2.106889000 | -1.569616000 |

[3e''<sub>ssi</sub> -V-H]<sup>+</sup> (TE = -3586.351415)

|   |              |             |             |
|---|--------------|-------------|-------------|
| 6 | -0.996336000 | 0.496165000 | 1.827183000 |
| 6 | -1.701491000 | 1.422422000 | 2.608540000 |
| 1 | -1.732335000 | 2.468830000 | 2.303999000 |
| 6 | -2.383887000 | 1.029662000 | 3.754403000 |
| 1 | -2.923111000 | 1.765926000 | 4.345396000 |

|    |              |              |              |
|----|--------------|--------------|--------------|
| 6  | -2.391840000 | -0.309591000 | 4.136809000  |
| 1  | -2.937568000 | -0.622915000 | 5.023155000  |
| 6  | -1.714260000 | -1.254681000 | 3.375376000  |
| 1  | -1.732054000 | -2.305190000 | 3.657567000  |
| 6  | -1.018943000 | -0.841332000 | 2.238877000  |
| 6  | 1.422060000  | 1.972465000  | 0.514856000  |
| 6  | 1.583426000  | 3.003675000  | 1.444195000  |
| 1  | 0.756866000  | 3.266737000  | 2.103982000  |
| 6  | 2.793236000  | 3.681154000  | 1.564267000  |
| 1  | 2.907844000  | 4.468376000  | 2.305032000  |
| 6  | 3.859142000  | 3.342058000  | 0.737955000  |
| 1  | 4.806890000  | 3.867431000  | 0.824367000  |
| 6  | 3.728827000  | 2.326137000  | -0.205141000 |
| 1  | 4.571657000  | 2.078868000  | -0.843719000 |
| 6  | 2.517515000  | 1.646767000  | -0.295158000 |
| 6  | -1.376369000 | 1.936812000  | -0.789270000 |
| 6  | -1.560804000 | 3.323425000  | -0.743430000 |
| 1  | -0.906327000 | 3.933737000  | -0.121198000 |
| 6  | -2.568082000 | 3.937886000  | -1.481353000 |
| 1  | -2.695971000 | 5.016536000  | -1.432001000 |
| 6  | -3.407653000 | 3.177233000  | -2.290682000 |
| 1  | -4.188100000 | 3.658142000  | -2.874633000 |
| 6  | -3.235514000 | 1.799716000  | -2.374545000 |
| 1  | -3.867424000 | 1.201773000  | -3.027709000 |
| 6  | -2.226853000 | 1.200828000  | -1.622696000 |
| 16 | -1.964453000 | -0.569626000 | -1.782585000 |
| 16 | -0.152058000 | -2.091723000 | 1.281074000  |
| 16 | 2.238947000  | 0.313410000  | -1.475651000 |
| 23 | 0.399840000  | -1.212797000 | -1.011744000 |
| 6  | 1.410577000  | -2.288981000 | 2.293359000  |
| 1  | 1.014511000  | -2.499769000 | 3.294548000  |
| 6  | 3.939946000  | -0.373277000 | -1.819246000 |
| 1  | 4.499315000  | 0.514972000  | -2.133749000 |
| 6  | -3.283891000 | -1.406310000 | -0.697946000 |
| 1  | -2.684422000 | -2.033597000 | -0.027267000 |
| 6  | -4.149481000 | -2.267360000 | -1.592671000 |
| 1  | -4.857494000 | -2.836745000 | -0.981974000 |
| 1  | -4.731465000 | -1.657181000 | -2.289459000 |
| 1  | -3.570257000 | -2.983436000 | -2.179676000 |
| 6  | -4.071550000 | -0.400943000 | 0.107732000  |
| 1  | -4.693697000 | 0.234069000  | -0.528894000 |
| 1  | -4.741524000 | -0.942482000 | 0.783166000  |
| 1  | -3.438648000 | 0.246138000  | 0.717775000  |
| 6  | 2.160035000  | -3.491601000 | 1.763171000  |
| 1  | 1.559892000  | -4.403778000 | 1.802468000  |
| 1  | 2.476228000  | -3.337237000 | 0.727764000  |

|    |              |              |              |
|----|--------------|--------------|--------------|
| 1  | 3.058425000  | -3.657439000 | 2.364918000  |
| 6  | 2.217242000  | -1.012460000 | 2.297227000  |
| 1  | 1.658995000  | -0.165426000 | 2.705807000  |
| 1  | 3.116937000  | -1.139191000 | 2.908683000  |
| 1  | 2.540212000  | -0.751897000 | 1.285119000  |
| 6  | 4.563971000  | -1.000821000 | -0.595848000 |
| 1  | 5.578143000  | -1.339236000 | -0.831114000 |
| 1  | 4.635720000  | -0.305279000 | 0.244699000  |
| 1  | 3.988478000  | -1.874711000 | -0.276268000 |
| 6  | 3.824814000  | -1.323790000 | -2.991567000 |
| 1  | 3.225936000  | -2.200818000 | -2.731799000 |
| 1  | 3.385661000  | -0.848363000 | -3.872016000 |
| 1  | 4.822018000  | -1.677526000 | -3.267887000 |
| 14 | -0.123807000 | 0.946508000  | 0.214829000  |
| 7  | -0.711813000 | -4.127546000 | -1.850621000 |
| 7  | -0.384114000 | -3.104446000 | -1.573057000 |
| 1  | 1.743141000  | -2.256678000 | -1.102611000 |

$[3f''_{SB} - V - H]^+$  (TE = -3321.709775)

|   |              |              |              |
|---|--------------|--------------|--------------|
| 6 | -1.295441000 | 1.435438000  | -0.979278000 |
| 6 | -2.097676000 | 1.781605000  | -2.075379000 |
| 1 | -2.049921000 | 1.184143000  | -2.985959000 |
| 6 | -2.953073000 | 2.876079000  | -2.022702000 |
| 1 | -3.561531000 | 3.129965000  | -2.887275000 |
| 6 | -3.038507000 | 3.645767000  | -0.864161000 |
| 1 | -3.712096000 | 4.497685000  | -0.820867000 |
| 6 | -2.281806000 | 3.306632000  | 0.250996000  |
| 1 | -2.374690000 | 3.873289000  | 1.174910000  |
| 6 | -1.417060000 | 2.215627000  | 0.174821000  |
| 6 | 1.229728000  | 0.830534000  | -1.561125000 |
| 6 | 1.271925000  | 1.672298000  | -2.687542000 |
| 1 | 0.335950000  | 2.033771000  | -3.110143000 |
| 6 | 2.466481000  | 2.032119000  | -3.296950000 |
| 1 | 2.455561000  | 2.665510000  | -4.180305000 |
| 6 | 3.676045000  | 1.590945000  | -2.768182000 |
| 1 | 4.617414000  | 1.877255000  | -3.230042000 |
| 6 | 3.680672000  | 0.818513000  | -1.614176000 |
| 1 | 4.625140000  | 0.533768000  | -1.155830000 |
| 6 | 2.472949000  | 0.438194000  | -1.030024000 |
| 6 | -0.494337000 | -1.226389000 | -1.177187000 |
| 6 | 0.191951000  | -1.832426000 | -2.262678000 |
| 1 | 0.983434000  | -1.272269000 | -2.752767000 |
| 6 | -0.152020000 | -3.072000000 | -2.773552000 |
| 1 | 0.378286000  | -3.466554000 | -3.636346000 |
| 6 | -1.159701000 | -3.814363000 | -2.166724000 |

|    |              |              |              |
|----|--------------|--------------|--------------|
| 1  | -1.424593000 | -4.798433000 | -2.545293000 |
| 6  | -1.797622000 | -3.313446000 | -1.041437000 |
| 1  | -2.519313000 | -3.924604000 | -0.506844000 |
| 6  | -1.499471000 | -2.036921000 | -0.559556000 |
| 16 | -2.165379000 | -1.625676000 | 1.054058000  |
| 16 | -0.529990000 | 1.657728000  | 1.620617000  |
| 16 | 2.520243000  | -0.345009000 | 0.576707000  |
| 23 | 0.168953000  | -0.802738000 | 1.168078000  |
| 6  | 0.697920000  | 3.023443000  | 1.968076000  |
| 1  | 0.050220000  | 3.856888000  | 2.266278000  |
| 6  | 3.568601000  | -1.874741000 | 0.359359000  |
| 1  | 4.543197000  | -1.469268000 | 0.062097000  |
| 6  | -3.951397000 | -1.057467000 | 0.853057000  |
| 1  | -4.147539000 | -0.724804000 | 1.879821000  |
| 6  | -4.783223000 | -2.282998000 | 0.531992000  |
| 1  | -5.845016000 | -2.021965000 | 0.581510000  |
| 1  | -4.590444000 | -2.638009000 | -0.485131000 |
| 1  | -4.607840000 | -3.107732000 | 1.225327000  |
| 6  | -4.173679000 | 0.063064000  | -0.127677000 |
| 1  | -3.830977000 | -0.208876000 | -1.130266000 |
| 1  | -5.247980000 | 0.264283000  | -0.198957000 |
| 1  | -3.683170000 | 0.988777000  | 0.167885000  |
| 6  | 1.536864000  | 2.576759000  | 3.147460000  |
| 1  | 0.931735000  | 2.304764000  | 4.015998000  |
| 1  | 2.170337000  | 1.723328000  | 2.883149000  |
| 1  | 2.202651000  | 3.389203000  | 3.451936000  |
| 6  | 1.519800000  | 3.405964000  | 0.760023000  |
| 1  | 0.904132000  | 3.621297000  | -0.117295000 |
| 1  | 2.096157000  | 4.308813000  | 0.987001000  |
| 1  | 2.232882000  | 2.622003000  | 0.493870000  |
| 6  | 3.672940000  | -2.524273000 | 1.724260000  |
| 1  | 4.360873000  | -3.372652000 | 1.671280000  |
| 1  | 4.051927000  | -1.838701000 | 2.486952000  |
| 1  | 2.700930000  | -2.907105000 | 2.048458000  |
| 6  | 3.024085000  | -2.796974000 | -0.703245000 |
| 1  | 2.028368000  | -3.159596000 | -0.431050000 |
| 1  | 2.965889000  | -2.311496000 | -1.681110000 |
| 1  | 3.683239000  | -3.665193000 | -0.806489000 |
| 5  | -0.184870000 | 0.329233000  | -1.074330000 |
| 7  | 0.938523000  | -0.985403000 | 4.254015000  |
| 7  | 0.648998000  | -0.870078000 | 3.187721000  |
| 1  | 0.514915000  | -2.460898000 | 1.306284000  |



Cartesian coordinates of the transition states (TS1) involved during the conversion of **[3-V-H]<sup>+</sup>** to **[3-N<sub>α</sub>-H]<sup>+</sup>** along with their total energies (in hartree) including zero point vibrational correction at M06-L-D3(heptane)/6-311+G\* level of theory.

**a' <sub>PC</sub> -TS1 (TE = -3062.470313)**

|    |              |              |              |
|----|--------------|--------------|--------------|
| 6  | -0.409088000 | 2.066397000  | 1.851183000  |
| 6  | 0.150743000  | 0.854485000  | 2.609544000  |
| 6  | -2.544309000 | -0.668930000 | 1.969238000  |
| 6  | -1.219112000 | -1.268054000 | 2.418783000  |
| 6  | 2.569096000  | -1.088182000 | 1.761630000  |
| 6  | 1.229520000  | -1.392839000 | 2.424410000  |
| 1  | -2.665034000 | 0.351891000  | 2.350915000  |
| 1  | -1.223050000 | -1.336446000 | 3.522962000  |
| 1  | 3.359253000  | -1.765977000 | 2.103828000  |
| 1  | 1.346917000  | -1.308713000 | 3.520226000  |
| 1  | -0.238291000 | 2.997760000  | 2.404802000  |
| 1  | 1.211116000  | 1.068969000  | 2.808089000  |
| 6  | -0.325537000 | 3.483791000  | -0.807952000 |
| 1  | 0.262561000  | 3.445363000  | -1.736548000 |
| 6  | -3.069636000 | -2.334336000 | -0.345847000 |
| 1  | -2.341988000 | -2.932808000 | 0.226116000  |
| 6  | 3.914640000  | -0.595690000 | -0.829424000 |
| 1  | 4.044617000  | 0.419955000  | -0.427534000 |
| 23 | -0.053242000 | -0.317270000 | -0.333518000 |
| 6  | 0.045730000  | -0.538322000 | 1.939605000  |
| 1  | -1.493430000 | 1.991688000  | 1.700052000  |
| 1  | -0.311406000 | 0.824526000  | 3.612212000  |
| 1  | 0.997361000  | -2.454309000 | 2.257673000  |
| 1  | 2.913453000  | -0.074860000 | 2.005578000  |
| 1  | -1.178733000 | -2.316864000 | 2.082400000  |
| 1  | -3.398406000 | -1.236823000 | 2.356297000  |
| 6  | 5.132411000  | -1.424820000 | -0.443983000 |
| 1  | 6.044674000  | -0.957350000 | -0.828084000 |
| 1  | 5.253609000  | -1.529238000 | 0.637767000  |
| 1  | 5.088579000  | -2.429363000 | -0.876640000 |
| 6  | 3.762520000  | -0.494748000 | -2.342478000 |
| 1  | 3.589787000  | -1.475793000 | -2.799673000 |
| 1  | 2.935662000  | 0.155688000  | -2.638889000 |
| 1  | 4.675112000  | -0.095853000 | -2.795805000 |
| 6  | -4.466945000 | -2.769559000 | 0.076185000  |
| 1  | -4.574355000 | -3.853224000 | -0.036087000 |
| 1  | -4.699045000 | -2.528228000 | 1.116450000  |
| 1  | -5.235041000 | -2.310954000 | -0.553063000 |
| 6  | -2.844676000 | -2.624288000 | -1.827180000 |
| 1  | -3.530212000 | -2.061705000 | -2.466727000 |
| 1  | -1.826162000 | -2.397820000 | -2.161142000 |

|    |              |              |              |
|----|--------------|--------------|--------------|
| 1  | -3.013174000 | -3.684937000 | -2.038945000 |
| 6  | -1.779425000 | 3.215668000  | -1.169213000 |
| 1  | -1.928774000 | 2.216749000  | -1.589548000 |
| 1  | -2.431651000 | 3.316620000  | -0.295009000 |
| 1  | -2.131554000 | 3.940744000  | -1.909181000 |
| 6  | -0.168876000 | 4.864905000  | -0.183731000 |
| 1  | 0.872987000  | 5.178187000  | -0.101556000 |
| 1  | -0.678027000 | 5.614772000  | -0.798027000 |
| 1  | -0.613245000 | 4.917166000  | 0.815663000  |
| 6  | 2.216971000  | -2.997924000 | -0.454532000 |
| 1  | 2.705124000  | -3.090106000 | -1.435992000 |
| 6  | 0.747293000  | -3.376500000 | -0.627391000 |
| 1  | 0.179610000  | -3.239714000 | 0.303250000  |
| 1  | 0.266552000  | -2.784058000 | -1.418918000 |
| 1  | 0.623527000  | -4.425584000 | -0.915473000 |
| 6  | 2.913740000  | -3.931998000 | 0.524843000  |
| 1  | 2.871307000  | -4.963283000 | 0.159615000  |
| 1  | 3.966386000  | -3.684429000 | 0.674174000  |
| 1  | 2.432117000  | -3.924171000 | 1.507303000  |
| 6  | -3.967842000 | 0.581010000  | -0.257481000 |
| 1  | -3.503262000 | 1.544857000  | -0.009626000 |
| 6  | -5.220287000 | 0.457184000  | 0.603562000  |
| 1  | -5.804932000 | -0.434329000 | 0.371713000  |
| 1  | -4.999361000 | 0.441446000  | 1.673656000  |
| 1  | -5.872362000 | 1.318617000  | 0.425611000  |
| 6  | -4.299512000 | 0.590419000  | -1.744677000 |
| 1  | -4.873546000 | -0.296033000 | -2.032669000 |
| 1  | -4.913585000 | 1.459957000  | -1.998846000 |
| 1  | -3.406505000 | 0.626503000  | -2.379039000 |
| 6  | 2.157250000  | 2.509795000  | 0.495487000  |
| 1  | 2.587772000  | 1.543403000  | 0.787496000  |
| 6  | 2.439927000  | 3.481415000  | 1.634804000  |
| 1  | 3.521333000  | 3.609072000  | 1.750906000  |
| 1  | 2.019882000  | 4.474610000  | 1.464821000  |
| 1  | 2.057617000  | 3.123644000  | 2.594302000  |
| 6  | 2.822186000  | 2.930473000  | -0.810829000 |
| 1  | 3.910712000  | 2.960827000  | -0.697830000 |
| 1  | 2.593280000  | 2.246853000  | -1.635993000 |
| 1  | 2.509858000  | 3.931577000  | -1.123276000 |
| 15 | -2.581597000 | -0.593716000 | 0.132103000  |
| 15 | 0.368424000  | 2.079224000  | 0.190439000  |
| 15 | 2.328379000  | -1.170311000 | -0.057628000 |
| 7  | 0.500299000  | 0.829433000  | -3.195704000 |
| 7  | 0.001177000  | 0.013599000  | -2.472591000 |
| 1  | -0.690187000 | -0.636537000 | -2.945820000 |

**b'<sub>psi</sub> -TS1 (TE = -3313.897644)**

|    |              |              |              |
|----|--------------|--------------|--------------|
| 6  | 0.044060000  | 2.533336000  | 1.826847000  |
| 6  | 0.442669000  | 1.377847000  | 2.747034000  |
| 6  | -2.797632000 | 0.068735000  | 1.944799000  |
| 6  | -1.768365000 | -0.740302000 | 2.740271000  |
| 6  | 2.555320000  | -1.415410000 | 1.757188000  |
| 6  | 1.319842000  | -1.570837000 | 2.647191000  |
| 1  | -2.648411000 | 1.145897000  | 2.095903000  |
| 1  | -1.853537000 | -0.509363000 | 3.809967000  |
| 1  | 3.301383000  | -2.199174000 | 1.933793000  |
| 1  | 1.597850000  | -1.426758000 | 3.699133000  |
| 1  | 0.417660000  | 3.503727000  | 2.176260000  |
| 1  | 1.529994000  | 1.395903000  | 2.906959000  |
| 6  | 0.105392000  | 3.607158000  | -0.940876000 |
| 1  | 0.612393000  | 3.428161000  | -1.901238000 |
| 6  | -3.155640000 | -2.041277000 | -0.002623000 |
| 1  | -2.283428000 | -2.588708000 | 0.377736000  |
| 6  | 3.727741000  | -1.067837000 | -0.901609000 |
| 1  | 4.043202000  | -0.086711000 | -0.515796000 |
| 23 | -0.100769000 | -0.145461000 | -0.502185000 |
| 1  | -1.047386000 | 2.629961000  | 1.768491000  |
| 1  | 0.004430000  | 1.524174000  | 3.743294000  |
| 1  | 0.938084000  | -2.597910000 | 2.582554000  |
| 1  | 3.066510000  | -0.465344000 | 1.970149000  |
| 1  | -1.984601000 | -1.813858000 | 2.650900000  |
| 1  | -3.830270000 | -0.134822000 | 2.251889000  |
| 6  | 4.823622000  | -2.077760000 | -0.582162000 |
| 1  | 5.776455000  | -1.740271000 | -1.002490000 |
| 1  | 4.979750000  | -2.224396000 | 0.489215000  |
| 1  | 4.612807000  | -3.052965000 | -1.030983000 |
| 6  | 3.538045000  | -0.949646000 | -2.408081000 |
| 1  | 3.185809000  | -1.887432000 | -2.851255000 |
| 1  | 2.823550000  | -0.171181000 | -2.683717000 |
| 1  | 4.487111000  | -0.707190000 | -2.895880000 |
| 6  | -4.340839000 | -2.442899000 | 0.868543000  |
| 1  | -4.531089000 | -3.514892000 | 0.751493000  |
| 1  | -4.163671000 | -2.269086000 | 1.932574000  |
| 1  | -5.262796000 | -1.925824000 | 0.596204000  |
| 6  | -3.364147000 | -2.452274000 | -1.456476000 |
| 1  | -4.303600000 | -2.055437000 | -1.852676000 |
| 1  | -2.560182000 | -2.119810000 | -2.122731000 |
| 1  | -3.423287000 | -3.542027000 | -1.539322000 |
| 6  | -1.394531000 | 3.506269000  | -1.184649000 |
| 1  | -1.676777000 | 2.528515000  | -1.584978000 |
| 1  | -1.967730000 | 3.670306000  | -0.265058000 |

|    |              |              |              |
|----|--------------|--------------|--------------|
| 1  | -1.724365000 | 4.264119000  | -1.901836000 |
| 6  | 0.492313000  | 4.993440000  | -0.442800000 |
| 1  | 1.571761000  | 5.153180000  | -0.428927000 |
| 1  | 0.066891000  | 5.759921000  | -1.098830000 |
| 1  | 0.112172000  | 5.191990000  | 0.564170000  |
| 6  | 1.640566000  | -3.126090000 | -0.472669000 |
| 1  | 1.973934000  | -3.236193000 | -1.515333000 |
| 6  | 0.122880000  | -3.272277000 | -0.445826000 |
| 1  | -0.269219000 | -3.134933000 | 0.567243000  |
| 1  | -0.386004000 | -2.567758000 | -1.122594000 |
| 1  | -0.194274000 | -4.265569000 | -0.781920000 |
| 6  | 2.292857000  | -4.208576000 | 0.377173000  |
| 1  | 2.033105000  | -5.198998000 | -0.010710000 |
| 1  | 3.381475000  | -4.145215000 | 0.399232000  |
| 1  | 1.941846000  | -4.173175000 | 1.413125000  |
| 6  | -3.834198000 | 0.850114000  | -0.689860000 |
| 1  | -3.514570000 | 1.834260000  | -0.313448000 |
| 6  | -5.291452000 | 0.647834000  | -0.294858000 |
| 1  | -5.701623000 | -0.268807000 | -0.728267000 |
| 1  | -5.443699000 | 0.605813000  | 0.786806000  |
| 1  | -5.901643000 | 1.473738000  | -0.675090000 |
| 6  | -3.674762000 | 0.856367000  | -2.208806000 |
| 1  | -4.131499000 | -0.023099000 | -2.668546000 |
| 1  | -4.166861000 | 1.732876000  | -2.641783000 |
| 1  | -2.627993000 | 0.876009000  | -2.529790000 |
| 6  | 2.503680000  | 2.320895000  | 0.278026000  |
| 1  | 2.789032000  | 1.323071000  | 0.641414000  |
| 6  | 3.034624000  | 3.333947000  | 1.285162000  |
| 1  | 4.127351000  | 3.275322000  | 1.324866000  |
| 1  | 2.782682000  | 4.363853000  | 1.025013000  |
| 1  | 2.670193000  | 3.153096000  | 2.298937000  |
| 6  | 3.123915000  | 2.514052000  | -1.100715000 |
| 1  | 4.207673000  | 2.363108000  | -1.069324000 |
| 1  | 2.720386000  | 1.816305000  | -1.842827000 |
| 1  | 2.957055000  | 3.527252000  | -1.479651000 |
| 15 | -2.594597000 | -0.261888000 | 0.141391000  |
| 15 | 0.647054000  | 2.179749000  | 0.126181000  |
| 15 | 2.100064000  | -1.364956000 | -0.036846000 |
| 14 | -0.024100000 | -0.356027000 | 2.064301000  |
| 7  | -0.218250000 | -1.166198000 | -3.350149000 |
| 7  | 0.189214000  | -0.331072000 | -2.584150000 |
| 1  | 0.580728000  | 0.554791000  | -3.014406000 |

$c'_{PB}$  -TS1 (TE = -3049.248700)

|   |              |             |             |
|---|--------------|-------------|-------------|
| 6 | -0.685243000 | 2.124512000 | 1.930419000 |
| 6 | 0.187299000  | 1.196670000 | 2.778724000 |

|    |              |              |              |
|----|--------------|--------------|--------------|
| 6  | -2.362356000 | -0.882788000 | 2.078292000  |
| 6  | -1.029928000 | -1.307815000 | 2.691425000  |
| 6  | 2.811773000  | -0.524980000 | 1.873133000  |
| 6  | 1.662381000  | -1.072808000 | 2.722828000  |
| 1  | -2.632982000 | 0.132877000  | 2.382326000  |
| 1  | -1.172770000 | -1.412945000 | 3.783321000  |
| 1  | 3.767922000  | -0.993401000 | 2.133295000  |
| 1  | 1.944371000  | -0.946301000 | 3.783038000  |
| 1  | -0.669124000 | 3.148264000  | 2.321908000  |
| 1  | 1.202660000  | 1.616924000  | 2.809825000  |
| 6  | -1.194862000 | 3.403873000  | -0.709168000 |
| 1  | -0.533620000 | 4.275086000  | -0.809589000 |
| 6  | -2.660953000 | -2.729363000 | -0.125742000 |
| 1  | -1.927022000 | -3.236200000 | 0.522376000  |
| 6  | 3.912182000  | 0.095655000  | -0.777018000 |
| 1  | 3.824408000  | 1.144975000  | -0.457132000 |
| 23 | 0.048547000  | -0.284749000 | -0.551898000 |
| 1  | -1.737731000 | 1.825366000  | 1.939228000  |
| 1  | -0.160828000 | 1.288570000  | 3.823839000  |
| 1  | 1.594116000  | -2.160853000 | 2.592578000  |
| 1  | 2.950837000  | 0.551125000  | 2.042933000  |
| 1  | -0.790076000 | -2.333187000 | 2.373619000  |
| 1  | -3.189641000 | -1.517289000 | 2.418720000  |
| 6  | 5.283352000  | -0.420315000 | -0.359431000 |
| 1  | 6.068729000  | 0.202183000  | -0.799654000 |
| 1  | 5.436450000  | -0.413103000 | 0.722833000  |
| 1  | 5.454269000  | -1.439585000 | -0.718838000 |
| 6  | 3.748092000  | 0.036966000  | -2.291152000 |
| 1  | 3.834453000  | -0.986988000 | -2.669845000 |
| 1  | 2.784129000  | 0.423723000  | -2.630697000 |
| 1  | 4.530279000  | 0.621943000  | -2.784132000 |
| 6  | -4.052007000 | -3.200660000 | 0.278992000  |
| 1  | -4.107994000 | -4.292541000 | 0.224291000  |
| 1  | -4.331744000 | -2.916431000 | 1.296636000  |
| 1  | -4.818137000 | -2.813521000 | -0.399153000 |
| 6  | -2.355648000 | -3.120990000 | -1.568265000 |
| 1  | -3.086252000 | -2.706567000 | -2.267613000 |
| 1  | -1.369707000 | -2.795419000 | -1.908334000 |
| 1  | -2.393250000 | -4.208978000 | -1.680340000 |
| 6  | -1.560067000 | 2.935070000  | -2.111715000 |
| 1  | -0.674215000 | 2.704931000  | -2.713359000 |
| 1  | -2.184438000 | 2.034992000  | -2.091851000 |
| 1  | -2.120140000 | 3.708592000  | -2.646527000 |
| 6  | -2.418076000 | 3.857261000  | 0.077596000  |
| 1  | -2.159259000 | 4.296743000  | 1.043606000  |
| 1  | -2.959516000 | 4.620782000  | -0.489200000 |

|    |              |              |              |
|----|--------------|--------------|--------------|
| 1  | -3.128274000 | 3.045725000  | 0.265376000  |
| 6  | 2.710075000  | -2.563448000 | -0.264062000 |
| 1  | 3.167387000  | -2.592207000 | -1.263991000 |
| 6  | 1.343697000  | -3.237183000 | -0.361069000 |
| 1  | 0.767785000  | -3.130102000 | 0.567474000  |
| 1  | 0.750535000  | -2.836171000 | -1.193635000 |
| 1  | 1.438302000  | -4.310536000 | -0.554410000 |
| 6  | 3.620753000  | -3.296902000 | 0.711493000  |
| 1  | 3.779526000  | -4.325800000 | 0.373058000  |
| 1  | 4.604694000  | -2.835140000 | 0.813187000  |
| 1  | 3.181527000  | -3.357390000 | 1.711683000  |
| 6  | -3.702825000 | 0.131726000  | -0.334846000 |
| 1  | -3.260981000 | 1.135000000  | -0.235131000 |
| 6  | -4.963730000 | 0.102095000  | 0.519460000  |
| 1  | -5.490348000 | -0.852081000 | 0.452828000  |
| 1  | -4.765138000 | 0.296435000  | 1.576452000  |
| 1  | -5.660921000 | 0.874331000  | 0.177523000  |
| 6  | -4.008485000 | -0.087622000 | -1.811902000 |
| 1  | -4.563646000 | -1.016485000 | -1.973078000 |
| 1  | -4.631613000 | 0.724206000  | -2.199976000 |
| 1  | -3.105010000 | -0.133931000 | -2.430749000 |
| 6  | 1.531375000  | 2.941243000  | 0.224916000  |
| 1  | 2.178778000  | 2.191251000  | 0.703107000  |
| 6  | 1.577685000  | 4.216357000  | 1.054182000  |
| 1  | 2.576317000  | 4.662132000  | 1.009903000  |
| 1  | 0.879094000  | 4.975610000  | 0.686119000  |
| 1  | 1.351045000  | 4.042075000  | 2.109067000  |
| 6  | 2.028050000  | 3.165726000  | -1.198426000 |
| 1  | 3.075642000  | 3.482778000  | -1.203757000 |
| 1  | 1.954864000  | 2.259413000  | -1.809127000 |
| 1  | 1.459891000  | 3.951384000  | -1.707402000 |
| 15 | -2.289953000 | -0.935032000 | 0.232394000  |
| 15 | -0.142281000 | 2.123792000  | 0.173746000  |
| 15 | 2.482143000  | -0.735770000 | 0.072320000  |
| 5  | 0.245827000  | -0.379888000 | 2.567482000  |
| 7  | 0.329131000  | -1.307529000 | -3.445578000 |
| 7  | 0.162536000  | -0.563902000 | -2.526198000 |
| 1  | -0.004862000 | 0.505901000  | -2.712820000 |

**d'**<sub>sc</sub> -TS1 (TE = -3049.248700)

|   |              |              |             |
|---|--------------|--------------|-------------|
| 6 | 0.171530000  | 1.585383000  | 2.143085000 |
| 6 | 0.219786000  | 0.163085000  | 2.682216000 |
| 6 | -2.792555000 | -0.132827000 | 1.741465000 |
| 6 | -1.817633000 | -1.223373000 | 2.131281000 |
| 6 | 1.849299000  | -2.179650000 | 1.368106000 |
| 6 | 0.445565000  | -2.230502000 | 1.941177000 |

|    |              |              |              |
|----|--------------|--------------|--------------|
| 1  | -2.602254000 | 0.807742000  | 2.266689000  |
| 1  | -1.930502000 | -1.394919000 | 3.218107000  |
| 1  | 2.390180000  | -3.119086000 | 1.507649000  |
| 1  | 0.537897000  | -2.514747000 | 3.005932000  |
| 1  | 0.656542000  | 2.299944000  | 2.815261000  |
| 1  | 1.269203000  | -0.056766000 | 2.918975000  |
| 6  | 0.698925000  | 3.241088000  | -0.207342000 |
| 1  | 1.019770000  | 3.079848000  | -1.244816000 |
| 6  | -3.277970000 | -1.291341000 | -0.811170000 |
| 1  | -3.887358000 | -1.752110000 | -0.025131000 |
| 6  | 3.362039000  | -0.906015000 | -0.698480000 |
| 1  | 3.388755000  | -0.160013000 | 0.105347000  |
| 23 | -0.230647000 | -0.322088000 | -0.372423000 |
| 16 | -2.673382000 | 0.298293000  | -0.041313000 |
| 16 | 1.055726000  | 1.576657000  | 0.541973000  |
| 16 | 1.766398000  | -1.818924000 | -0.433809000 |
| 6  | -0.358590000 | -0.937239000 | 1.766002000  |
| 1  | -0.848913000 | 1.931269000  | 1.958603000  |
| 1  | -0.289575000 | 0.164261000  | 3.661077000  |
| 1  | -0.092118000 | -3.071245000 | 1.477424000  |
| 1  | 2.447744000  | -1.377845000 | 1.815101000  |
| 1  | -2.145716000 | -2.166899000 | 1.672088000  |
| 1  | -3.836224000 | -0.394643000 | 1.941687000  |
| 6  | 4.530478000  | -1.861479000 | -0.575205000 |
| 1  | 5.471283000  | -1.314324000 | -0.691635000 |
| 1  | 4.562087000  | -2.357473000 | 0.397970000  |
| 1  | 4.499906000  | -2.635138000 | -1.347551000 |
| 6  | 3.302591000  | -0.207452000 | -2.040998000 |
| 1  | 3.149907000  | -0.914457000 | -2.863018000 |
| 1  | 2.508743000  | 0.544595000  | -2.080975000 |
| 1  | 4.248007000  | 0.307504000  | -2.233041000 |
| 6  | -4.136819000 | -0.965056000 | -2.015564000 |
| 1  | -4.506235000 | -1.886214000 | -2.476684000 |
| 1  | -4.999364000 | -0.352755000 | -1.747981000 |
| 1  | -3.568072000 | -0.424845000 | -2.779800000 |
| 6  | -2.120241000 | -2.211628000 | -1.172329000 |
| 1  | -1.580970000 | -1.853593000 | -2.057789000 |
| 1  | -1.414152000 | -2.371982000 | -0.341587000 |
| 1  | -2.476525000 | -3.212245000 | -1.436014000 |
| 6  | -0.770098000 | 3.604359000  | -0.185852000 |
| 1  | -1.401188000 | 2.828017000  | -0.623756000 |
| 1  | -1.125348000 | 3.814816000  | 0.827166000  |
| 1  | -0.926400000 | 4.516392000  | -0.769827000 |
| 6  | 1.580158000  | 4.288496000  | 0.446099000  |
| 1  | 2.639800000  | 4.030552000  | 0.393772000  |
| 1  | 1.444917000  | 5.252466000  | -0.053619000 |

|   |              |              |              |
|---|--------------|--------------|--------------|
| 1 | 1.319567000  | 4.434376000  | 1.498740000  |
| 7 | -0.587902000 | 1.515441000  | -2.879138000 |
| 7 | -0.317171000 | 0.440081000  | -2.428321000 |
| 1 | 0.018335000  | -0.272597000 | -3.134976000 |

$e'_{ssi}$  -TS1 (TE = -2877.624030)

|    |              |              |              |
|----|--------------|--------------|--------------|
| 6  | 0.171530000  | 1.585383000  | 2.143085000  |
| 6  | 0.219786000  | 0.163085000  | 2.682216000  |
| 6  | -2.792555000 | -0.132827000 | 1.741465000  |
| 6  | -1.817633000 | -1.223373000 | 2.131281000  |
| 6  | 1.849299000  | -2.179650000 | 1.368106000  |
| 6  | 0.445565000  | -2.230502000 | 1.941177000  |
| 1  | -2.602254000 | 0.807742000  | 2.266689000  |
| 1  | -1.930502000 | -1.394919000 | 3.218107000  |
| 1  | 2.390180000  | -3.119086000 | 1.507649000  |
| 1  | 0.537897000  | -2.514747000 | 3.005932000  |
| 1  | 0.656542000  | 2.299944000  | 2.815261000  |
| 1  | 1.269203000  | -0.056766000 | 2.918975000  |
| 6  | 0.698925000  | 3.241088000  | -0.207342000 |
| 1  | 1.019770000  | 3.079848000  | -1.244816000 |
| 6  | -3.277970000 | -1.291341000 | -0.811170000 |
| 1  | -3.887358000 | -1.752110000 | -0.025131000 |
| 6  | 3.362039000  | -0.906015000 | -0.698480000 |
| 1  | 3.388755000  | -0.160013000 | 0.105347000  |
| 23 | -0.230647000 | -0.322088000 | -0.372423000 |
| 16 | -2.673382000 | 0.298293000  | -0.041313000 |
| 16 | 1.055726000  | 1.576657000  | 0.541973000  |
| 16 | 1.766398000  | -1.818924000 | -0.433809000 |
| 6  | -0.358590000 | -0.937239000 | 1.766002000  |
| 1  | -0.848913000 | 1.931269000  | 1.958603000  |
| 1  | -0.289575000 | 0.164261000  | 3.661077000  |
| 1  | -0.092118000 | -3.071245000 | 1.477424000  |
| 1  | 2.447744000  | -1.377845000 | 1.815101000  |
| 1  | -2.145716000 | -2.166899000 | 1.672088000  |
| 1  | -3.836224000 | -0.394643000 | 1.941687000  |
| 6  | 4.530478000  | -1.861479000 | -0.575205000 |
| 1  | 5.471283000  | -1.314324000 | -0.691635000 |
| 1  | 4.562087000  | -2.357473000 | 0.397970000  |
| 1  | 4.499906000  | -2.635138000 | -1.347551000 |
| 6  | 3.302591000  | -0.207452000 | -2.040998000 |
| 1  | 3.149907000  | -0.914457000 | -2.863018000 |
| 1  | 2.508743000  | 0.544595000  | -2.080975000 |
| 1  | 4.248007000  | 0.307504000  | -2.233041000 |
| 6  | -4.136819000 | -0.965056000 | -2.015564000 |
| 1  | -4.506235000 | -1.886214000 | -2.476684000 |
| 1  | -4.999364000 | -0.352755000 | -1.747981000 |



|   |              |              |              |
|---|--------------|--------------|--------------|
| 1 | -3.568072000 | -0.424845000 | -2.779800000 |
| 6 | -2.120241000 | -2.211628000 | -1.172329000 |
| 1 | -1.580970000 | -1.853593000 | -2.057789000 |
| 1 | -1.414152000 | -2.371982000 | -0.341587000 |
| 1 | -2.476525000 | -3.212245000 | -1.436014000 |
| 6 | -0.770098000 | 3.604359000  | -0.185852000 |
| 1 | -1.401188000 | 2.828017000  | -0.623756000 |
| 1 | -1.125348000 | 3.814816000  | 0.827166000  |
| 1 | -0.926400000 | 4.516392000  | -0.769827000 |
| 6 | 1.580158000  | 4.288496000  | 0.446099000  |
| 1 | 2.639800000  | 4.030552000  | 0.393772000  |
| 1 | 1.444917000  | 5.252466000  | -0.053619000 |
| 1 | 1.319567000  | 4.434376000  | 1.498740000  |
| 7 | -0.587902000 | 1.515441000  | -2.879138000 |
| 7 | -0.317171000 | 0.440081000  | -2.428321000 |
| 1 | 0.018335000  | -0.272597000 | -3.134976000 |

**f'<sub>SB</sub> -TS1 (TE = -2864.385755)**

|    |              |              |              |
|----|--------------|--------------|--------------|
| 6  | -0.361357000 | 1.785240000  | 2.040271000  |
| 6  | 0.013495000  | 0.652394000  | 2.990420000  |
| 6  | -2.571758000 | -0.846884000 | 1.686073000  |
| 6  | -1.280163000 | -1.593781000 | 1.973248000  |
| 6  | 2.509134000  | -1.189830000 | 1.686420000  |
| 6  | 1.359199000  | -1.672593000 | 2.564173000  |
| 1  | -2.741271000 | -0.035656000 | 2.399660000  |
| 1  | -1.437352000 | -2.225025000 | 2.871423000  |
| 1  | 3.459075000  | -1.662296000 | 1.949010000  |
| 1  | 1.701206000  | -1.575489000 | 3.606290000  |
| 1  | -0.172758000 | 2.767608000  | 2.482452000  |
| 1  | 0.985304000  | 0.891503000  | 3.440715000  |
| 6  | 0.229667000  | 3.071093000  | -0.511291000 |
| 1  | 0.916736000  | 2.919598000  | -1.351333000 |
| 6  | -3.565565000 | -1.348926000 | -0.945320000 |
| 1  | -3.155856000 | -2.325648000 | -0.653610000 |
| 6  | 3.365411000  | -0.645220000 | -1.066781000 |
| 1  | 2.912877000  | 0.348046000  | -1.181276000 |
| 23 | -0.105020000 | -0.549965000 | -0.397899000 |
| 16 | -2.578323000 | -0.085945000 | 0.011377000  |
| 16 | 0.686046000  | 1.610686000  | 0.546613000  |
| 16 | 2.147621000  | -1.638132000 | -0.058442000 |
| 1  | -1.411582000 | 1.755968000  | 1.733070000  |
| 1  | -0.701178000 | 0.676419000  | 3.829359000  |
| 1  | 1.208272000  | -2.748403000 | 2.403640000  |
| 1  | 2.637354000  | -0.103404000 | 1.741272000  |
| 1  | -1.106705000 | -2.376591000 | 1.209399000  |
| 1  | -3.453601000 | -1.491489000 | 1.733059000  |

|   |              |              |              |
|---|--------------|--------------|--------------|
| 6 | 4.703758000  | -0.541153000 | -0.367937000 |
| 1 | 5.400814000  | -0.002365000 | -1.016887000 |
| 1 | 4.654279000  | 0.008687000  | 0.573752000  |
| 1 | 5.138725000  | -1.525925000 | -0.171569000 |
| 6 | 3.472913000  | -1.330308000 | -2.415130000 |
| 1 | 3.960373000  | -2.305277000 | -2.325686000 |
| 1 | 2.503942000  | -1.480307000 | -2.895886000 |
| 1 | 4.073267000  | -0.715453000 | -3.091618000 |
| 6 | -5.027476000 | -1.249954000 | -0.562779000 |
| 1 | -5.597931000 | -2.029513000 | -1.076882000 |
| 1 | -5.199215000 | -1.379745000 | 0.508428000  |
| 1 | -5.447005000 | -0.283541000 | -0.854939000 |
| 6 | -3.337047000 | -1.101626000 | -2.422361000 |
| 1 | -3.624168000 | -0.085814000 | -2.711653000 |
| 1 | -2.295981000 | -1.254466000 | -2.721837000 |
| 1 | -3.948456000 | -1.789494000 | -3.012713000 |
| 6 | -1.197237000 | 3.017351000  | -1.010901000 |
| 1 | -1.384161000 | 2.131948000  | -1.622827000 |
| 1 | -1.926730000 | 3.031082000  | -0.195073000 |
| 1 | -1.397776000 | 3.894555000  | -1.634072000 |
| 6 | 0.561925000  | 4.356455000  | 0.219868000  |
| 1 | 1.582651000  | 4.364183000  | 0.608529000  |
| 1 | 0.463947000  | 5.200892000  | -0.468857000 |
| 1 | -0.123401000 | 4.546935000  | 1.051229000  |
| 5 | 0.032408000  | -0.825107000 | 2.414696000  |
| 7 | 0.906894000  | 0.860460000  | -2.834635000 |
| 7 | 0.305731000  | -0.034710000 | -2.300782000 |
| 1 | -0.116696000 | -0.815827000 | -2.929719000 |

**a''<sub>PC</sub> -TS1 (TE = -3519.737201)**

|   |              |              |             |
|---|--------------|--------------|-------------|
| 6 | 0.311096000  | 1.431378000  | 1.620480000 |
| 6 | -0.447175000 | 2.111925000  | 2.592905000 |
| 1 | -1.267505000 | 1.588176000  | 3.078644000 |
| 6 | -0.165424000 | 3.416868000  | 2.966125000 |
| 1 | -0.771518000 | 3.900469000  | 3.729291000 |
| 6 | 0.899267000  | 4.099976000  | 2.382854000 |
| 1 | 1.132324000  | 5.119591000  | 2.678321000 |
| 6 | 1.653775000  | 3.465629000  | 1.406232000 |
| 1 | 2.461424000  | 4.015764000  | 0.927983000 |
| 6 | 1.377757000  | 2.151954000  | 1.003192000 |
| 6 | -1.301071000 | -0.510402000 | 1.799138000 |
| 6 | -1.350965000 | -1.310730000 | 2.950725000 |
| 1 | -0.426004000 | -1.562602000 | 3.462606000 |
| 6 | -2.547380000 | -1.802660000 | 3.457884000 |
| 1 | -2.537591000 | -2.425225000 | 4.349726000 |
| 6 | -3.748747000 | -1.499332000 | 2.829684000 |

|    |              |              |              |
|----|--------------|--------------|--------------|
| 1  | -4.690603000 | -1.880746000 | 3.215563000  |
| 6  | -3.731317000 | -0.709414000 | 1.687529000  |
| 1  | -4.671001000 | -0.496427000 | 1.186806000  |
| 6  | -2.530954000 | -0.220366000 | 1.160915000  |
| 6  | 1.129942000  | -0.941030000 | 1.638583000  |
| 6  | 1.876628000  | -0.773270000 | 2.810531000  |
| 1  | 1.730396000  | 0.126956000  | 3.406794000  |
| 6  | 2.779390000  | -1.741245000 | 3.233528000  |
| 1  | 3.345621000  | -1.589520000 | 4.149941000  |
| 6  | 2.952828000  | -2.907394000 | 2.493762000  |
| 1  | 3.653087000  | -3.670086000 | 2.824825000  |
| 6  | 2.228054000  | -3.090228000 | 1.321241000  |
| 1  | 2.372953000  | -3.999317000 | 0.743495000  |
| 6  | 1.328743000  | -2.114456000 | 0.881979000  |
| 6  | 0.018519000  | 0.006884000  | 1.261451000  |
| 23 | -0.022392000 | 0.254595000  | -0.977675000 |
| 6  | 2.136990000  | 2.904561000  | -1.672466000 |
| 1  | 2.623718000  | 3.754313000  | -1.177934000 |
| 6  | -3.930244000 | -0.036904000 | -1.420567000 |
| 1  | -3.978574000 | -1.085208000 | -1.088719000 |
| 6  | 1.487906000  | -2.968936000 | -1.982448000 |
| 1  | 0.955362000  | -2.711590000 | -2.910569000 |
| 6  | 1.654947000  | -4.484306000 | -1.955392000 |
| 1  | 2.259369000  | -4.797882000 | -2.813111000 |
| 1  | 2.174489000  | -4.838899000 | -1.061817000 |
| 1  | 0.708221000  | -5.022475000 | -2.021703000 |
| 6  | 2.842280000  | -2.266991000 | -2.026501000 |
| 1  | 3.453479000  | -2.519129000 | -1.153820000 |
| 1  | 3.399071000  | -2.576366000 | -2.916177000 |
| 1  | 2.747713000  | -1.176642000 | -2.063449000 |
| 6  | 2.894798000  | 2.573358000  | -2.952175000 |
| 1  | 3.968218000  | 2.453479000  | -2.786524000 |
| 1  | 2.529037000  | 1.649299000  | -3.415103000 |
| 1  | 2.772058000  | 3.372644000  | -3.689649000 |
| 6  | 0.692383000  | 3.290168000  | -1.966534000 |
| 1  | 0.103238000  | 3.449070000  | -1.056443000 |
| 1  | 0.636334000  | 4.215126000  | -2.549142000 |
| 1  | 0.189764000  | 2.524202000  | -2.571870000 |
| 6  | -5.287423000 | 0.612051000  | -1.162679000 |
| 1  | -6.067866000 | 0.045299000  | -1.680730000 |
| 1  | -5.567720000 | 0.654697000  | -0.109636000 |
| 1  | -5.333013000 | 1.632136000  | -1.551827000 |
| 6  | -3.628423000 | -0.034588000 | -2.916744000 |
| 1  | -3.468884000 | 0.978402000  | -3.303055000 |
| 1  | -2.749590000 | -0.638009000 | -3.161057000 |
| 1  | -4.467901000 | -0.455664000 | -3.478608000 |

|    |              |              |              |
|----|--------------|--------------|--------------|
| 15 | 0.412592000  | -2.167062000 | -0.688896000 |
| 15 | -2.459983000 | 0.610588000  | -0.458497000 |
| 15 | 2.164347000  | 1.450210000  | -0.498485000 |
| 6  | -2.676273000 | 2.447158000  | -0.160898000 |
| 1  | -1.687950000 | 2.725475000  | 0.237083000  |
| 6  | -2.871632000 | 3.199094000  | -1.473680000 |
| 1  | -3.869876000 | 3.048757000  | -1.892438000 |
| 1  | -2.753426000 | 4.275996000  | -1.316886000 |
| 1  | -2.148238000 | 2.905203000  | -2.241465000 |
| 6  | -3.704379000 | 2.829245000  | 0.893950000  |
| 1  | -3.610011000 | 3.892849000  | 1.137464000  |
| 1  | -4.730118000 | 2.668837000  | 0.554209000  |
| 1  | -3.568722000 | 2.269550000  | 1.823416000  |
| 6  | 3.992526000  | 1.159506000  | -0.265592000 |
| 1  | 4.299913000  | 0.826591000  | -1.268174000 |
| 6  | 4.299464000  | 0.048138000  | 0.722287000  |
| 1  | 4.065248000  | 0.354343000  | 1.744695000  |
| 1  | 3.746744000  | -0.871369000 | 0.517715000  |
| 1  | 5.367475000  | -0.190177000 | 0.692819000  |
| 6  | 4.760108000  | 2.424039000  | 0.096691000  |
| 1  | 5.831699000  | 2.205256000  | 0.142434000  |
| 1  | 4.631707000  | 3.238106000  | -0.620735000 |
| 1  | 4.471735000  | 2.793636000  | 1.085724000  |
| 6  | -1.096933000 | -3.227866000 | -0.429233000 |
| 1  | -1.747491000 | -2.560510000 | 0.153182000  |
| 6  | -0.880141000 | -4.484593000 | 0.402175000  |
| 1  | -1.840516000 | -4.975384000 | 0.592316000  |
| 1  | -0.238066000 | -5.217473000 | -0.092149000 |
| 1  | -0.435454000 | -4.255951000 | 1.374391000  |
| 6  | -1.785196000 | -3.493646000 | -1.763488000 |
| 1  | -2.769001000 | -3.946361000 | -1.604627000 |
| 1  | -1.939166000 | -2.572303000 | -2.336792000 |
| 1  | -1.218640000 | -4.179824000 | -2.399256000 |
| 7  | 0.739032000  | -0.381814000 | -3.942517000 |
| 7  | -0.050225000 | 0.026139000  | -3.136956000 |
| 1  | -0.939312000 | 0.437460000  | -3.537628000 |

**b''<sub>psi</sub> -TS1 (TE = -3771.148505)**

|   |              |             |             |
|---|--------------|-------------|-------------|
| 6 | -1.784939000 | 0.991004000 | 1.907496000 |
| 6 | -2.009444000 | 1.302512000 | 3.255631000 |
| 1 | -1.181047000 | 1.274159000 | 3.963430000 |
| 6 | -3.277757000 | 1.632888000 | 3.717386000 |
| 1 | -3.433179000 | 1.865420000 | 4.768495000 |
| 6 | -4.352023000 | 1.662862000 | 2.831696000 |
| 1 | -5.345804000 | 1.925440000 | 3.186467000 |
| 6 | -4.157852000 | 1.346431000 | 1.493223000 |

|    |              |              |              |
|----|--------------|--------------|--------------|
| 1  | -5.010335000 | 1.365153000  | 0.816926000  |
| 6  | -2.883195000 | 1.001375000  | 1.026151000  |
| 6  | 0.788441000  | -0.741836000 | 2.187192000  |
| 6  | 1.404217000  | -0.459131000 | 3.413783000  |
| 1  | 1.345986000  | 0.548724000  | 3.825816000  |
| 6  | 2.123253000  | -1.427713000 | 4.104580000  |
| 1  | 2.601960000  | -1.182733000 | 5.050084000  |
| 6  | 2.240942000  | -2.709451000 | 3.575092000  |
| 1  | 2.806056000  | -3.472015000 | 4.105620000  |
| 6  | 1.642230000  | -3.015430000 | 2.358815000  |
| 1  | 1.753118000  | -4.018657000 | 1.957941000  |
| 6  | 0.919670000  | -2.042500000 | 1.658866000  |
| 6  | 1.021691000  | 2.112059000  | 1.221374000  |
| 6  | 0.861179000  | 3.176793000  | 2.115523000  |
| 1  | 0.035552000  | 3.161067000  | 2.827099000  |
| 6  | 1.722945000  | 4.268400000  | 2.103528000  |
| 1  | 1.574731000  | 5.089601000  | 2.801361000  |
| 6  | 2.776022000  | 4.306136000  | 1.195794000  |
| 1  | 3.458940000  | 5.152177000  | 1.182781000  |
| 6  | 2.956432000  | 3.260941000  | 0.296433000  |
| 1  | 3.789022000  | 3.305645000  | -0.397490000 |
| 6  | 2.080463000  | 2.170256000  | 0.288237000  |
| 23 | -0.151235000 | -0.192726000 | -1.224226000 |
| 6  | -4.189554000 | -0.149912000 | -1.312744000 |
| 1  | -4.921909000 | 0.659862000  | -1.195292000 |
| 6  | 1.368759000  | -3.536586000 | -0.857324000 |
| 1  | 2.350705000  | -3.173409000 | -0.518888000 |
| 6  | 2.974522000  | 1.412924000  | -2.489015000 |
| 1  | 2.947128000  | 0.502512000  | -3.108592000 |
| 6  | 4.414701000  | 1.928398000  | -2.489696000 |
| 1  | 4.812589000  | 1.885149000  | -3.508736000 |
| 1  | 4.472359000  | 2.976099000  | -2.186894000 |
| 1  | 5.097765000  | 1.362873000  | -1.856073000 |
| 6  | 2.052907000  | 2.445815000  | -3.127373000 |
| 1  | 1.947468000  | 3.332817000  | -2.492736000 |
| 1  | 2.470090000  | 2.781368000  | -4.081911000 |
| 1  | 1.050465000  | 2.062621000  | -3.337789000 |
| 6  | -4.124490000 | -0.517961000 | -2.788611000 |
| 1  | -3.814772000 | 0.312438000  | -3.429239000 |
| 1  | -3.433095000 | -1.350755000 | -2.961557000 |
| 1  | -5.106230000 | -0.847682000 | -3.141786000 |
| 6  | -4.647155000 | -1.332631000 | -0.471337000 |
| 1  | -4.684043000 | -1.107916000 | 0.597283000  |
| 1  | -5.651057000 | -1.645203000 | -0.775251000 |
| 1  | -3.992283000 | -2.195349000 | -0.607674000 |
| 6  | 1.278056000  | -5.023552000 | -0.525703000 |

|    |              |              |              |
|----|--------------|--------------|--------------|
| 1  | 2.095376000  | -5.556520000 | -1.022615000 |
| 1  | 1.353645000  | -5.248403000 | 0.538315000  |
| 1  | 0.349546000  | -5.471869000 | -0.887146000 |
| 6  | 1.290490000  | -3.343480000 | -2.371706000 |
| 1  | 0.327787000  | -3.676702000 | -2.774146000 |
| 1  | 1.431533000  | -2.300038000 | -2.677089000 |
| 1  | 2.064308000  | -3.931950000 | -2.875267000 |
| 15 | 2.237952000  | 0.768196000  | -0.890693000 |
| 15 | 0.200514000  | -2.341587000 | -0.000475000 |
| 15 | -2.565491000 | 0.561414000  | -0.726920000 |
| 6  | -1.429351000 | -3.201339000 | 0.301560000  |
| 1  | -2.063296000 | -2.364053000 | 0.635968000  |
| 6  | -1.997140000 | -3.732590000 | -1.010229000 |
| 1  | -1.405600000 | -4.559194000 | -1.411631000 |
| 1  | -3.010454000 | -4.119669000 | -0.865660000 |
| 1  | -2.050913000 | -2.957823000 | -1.784343000 |
| 6  | -1.434590000 | -4.254298000 | 1.400459000  |
| 1  | -2.460989000 | -4.585064000 | 1.590432000  |
| 1  | -0.859193000 | -5.142742000 | 1.130550000  |
| 1  | -1.037579000 | -3.871143000 | 2.343242000  |
| 6  | -2.508530000 | 2.205685000  | -1.624357000 |
| 1  | -2.495386000 | 1.925560000  | -2.687151000 |
| 6  | -1.196997000 | 2.911352000  | -1.309630000 |
| 1  | -1.120656000 | 3.184267000  | -0.251616000 |
| 1  | -0.309897000 | 2.304851000  | -1.545352000 |
| 1  | -1.094398000 | 3.829804000  | -1.897198000 |
| 6  | -3.693286000 | 3.122498000  | -1.366172000 |
| 1  | -3.590593000 | 4.039817000  | -1.954954000 |
| 1  | -4.651856000 | 2.676238000  | -1.642986000 |
| 1  | -3.751318000 | 3.420558000  | -0.314703000 |
| 6  | 3.523880000  | -0.382149000 | -0.153267000 |
| 1  | 2.917625000  | -1.040533000 | 0.481521000  |
| 6  | 4.544132000  | 0.290010000  | 0.755677000  |
| 1  | 5.217400000  | -0.464744000 | 1.175932000  |
| 1  | 5.167611000  | 1.021071000  | 0.233039000  |
| 1  | 4.068440000  | 0.805543000  | 1.593477000  |
| 6  | 4.174500000  | -1.249595000 | -1.227064000 |
| 1  | 4.720259000  | -2.075862000 | -0.759898000 |
| 1  | 3.447946000  | -1.690768000 | -1.915865000 |
| 1  | 4.896826000  | -0.697482000 | -1.832770000 |
| 14 | -0.098252000 | 0.586916000  | 1.159189000  |
| 7  | -0.786663000 | 0.585087000  | -4.047353000 |
| 7  | -0.806294000 | -0.289110000 | -3.217786000 |
| 1  | -1.025126000 | -1.267973000 | -3.555251000 |

**c''<sub>PB</sub>-TS1 (TE = -3506.492429)**

|    |              |              |              |
|----|--------------|--------------|--------------|
| 6  | 1.526440000  | -0.395903000 | 1.964025000  |
| 6  | 1.635368000  | -0.991644000 | 3.234839000  |
| 1  | 0.728027000  | -1.189778000 | 3.804529000  |
| 6  | 2.860808000  | -1.332071000 | 3.794497000  |
| 1  | 2.897917000  | -1.785854000 | 4.782334000  |
| 6  | 4.035101000  | -1.101522000 | 3.086155000  |
| 1  | 4.999649000  | -1.368167000 | 3.511074000  |
| 6  | 3.962184000  | -0.541426000 | 1.817650000  |
| 1  | 4.881380000  | -0.387708000 | 1.255371000  |
| 6  | 2.730695000  | -0.190783000 | 1.253855000  |
| 6  | -0.407440000 | 1.541753000  | 1.741782000  |
| 6  | 0.143455000  | 2.251932000  | 2.824272000  |
| 1  | 1.031550000  | 1.856827000  | 3.316242000  |
| 6  | -0.445393000 | 3.409814000  | 3.318531000  |
| 1  | -0.002577000 | 3.924302000  | 4.168428000  |
| 6  | -1.617328000 | 3.893265000  | 2.745233000  |
| 1  | -2.100729000 | 4.781035000  | 3.145629000  |
| 6  | -2.158237000 | 3.245511000  | 1.638346000  |
| 1  | -3.061347000 | 3.643906000  | 1.180775000  |
| 6  | -1.553268000 | 2.100613000  | 1.115762000  |
| 6  | -1.106278000 | -1.016067000 | 1.747713000  |
| 6  | -1.822036000 | -0.898109000 | 2.954485000  |
| 1  | -1.615132000 | -0.053206000 | 3.612205000  |
| 6  | -2.787190000 | -1.821967000 | 3.334879000  |
| 1  | -3.313644000 | -1.698904000 | 4.278835000  |
| 6  | -3.092046000 | -2.890940000 | 2.498623000  |
| 1  | -3.853953000 | -3.613495000 | 2.780356000  |
| 6  | -2.427118000 | -3.017203000 | 1.286511000  |
| 1  | -2.691009000 | -3.837341000 | 0.623596000  |
| 6  | -1.439285000 | -2.099102000 | 0.909284000  |
| 23 | 0.166869000  | 0.207520000  | -1.089444000 |
| 6  | 3.389037000  | 2.110200000  | -0.457809000 |
| 1  | 4.442835000  | 1.967661000  | -0.182806000 |
| 6  | -3.871601000 | 1.151734000  | -0.473163000 |
| 1  | -4.286474000 | 2.141573000  | -0.232174000 |
| 6  | 0.454605000  | -3.663482000 | -0.739457000 |
| 1  | 0.612352000  | -3.882366000 | -1.807759000 |
| 6  | -0.092060000 | -4.900285000 | -0.036880000 |
| 1  | 0.638448000  | -5.712256000 | -0.112962000 |
| 1  | -0.243884000 | -4.708246000 | 1.029254000  |
| 1  | -1.029207000 | -5.274590000 | -0.445503000 |
| 6  | 1.790175000  | -3.288550000 | -0.113130000 |
| 1  | 1.682539000  | -3.060402000 | 0.952663000  |
| 1  | 2.503183000  | -4.114704000 | -0.199101000 |

|    |              |              |              |
|----|--------------|--------------|--------------|
| 1  | 2.231776000  | -2.414874000 | -0.588887000 |
| 6  | 3.319637000  | 2.737384000  | -1.846389000 |
| 1  | 3.883379000  | 3.675184000  | -1.869475000 |
| 1  | 3.728190000  | 2.096868000  | -2.632975000 |
| 1  | 2.292514000  | 2.975838000  | -2.135889000 |
| 6  | 2.740663000  | 2.991493000  | 0.598069000  |
| 1  | 2.862661000  | 2.583768000  | 1.604881000  |
| 1  | 3.192183000  | 3.988693000  | 0.586949000  |
| 1  | 1.667359000  | 3.120705000  | 0.429224000  |
| 6  | -4.378410000 | 0.728592000  | -1.845784000 |
| 1  | -5.471660000 | 0.685030000  | -1.852739000 |
| 1  | -4.076683000 | 1.410959000  | -2.645871000 |
| 1  | -4.017453000 | -0.269298000 | -2.114118000 |
| 6  | -4.288706000 | 0.179350000  | 0.617705000  |
| 1  | -3.890424000 | -0.825392000 | 0.443278000  |
| 1  | -3.949360000 | 0.497181000  | 1.606852000  |
| 1  | -5.379531000 | 0.095425000  | 0.652090000  |
| 5  | 0.061855000  | 0.046623000  | 1.532204000  |
| 15 | 2.651080000  | 0.397713000  | -0.473040000 |
| 15 | -2.034475000 | 1.410858000  | -0.509061000 |
| 15 | -0.663303000 | -2.162265000 | -0.738807000 |
| 6  | -1.811577000 | 2.854688000  | -1.690713000 |
| 1  | -1.814855000 | 2.367971000  | -2.678150000 |
| 6  | -0.426151000 | 3.445099000  | -1.464282000 |
| 1  | -0.140902000 | 4.117538000  | -2.278656000 |
| 1  | -0.376228000 | 4.002226000  | -0.523070000 |
| 1  | 0.367219000  | 2.684105000  | -1.421050000 |
| 6  | -2.870039000 | 3.946795000  | -1.692896000 |
| 1  | -2.650768000 | 4.669332000  | -2.485932000 |
| 1  | -3.878582000 | 3.570406000  | -1.878553000 |
| 1  | -2.885365000 | 4.508568000  | -0.755368000 |
| 6  | 3.936918000  | -0.642413000 | -1.388770000 |
| 1  | 4.019072000  | -1.540032000 | -0.763184000 |
| 6  | 5.334100000  | -0.043227000 | -1.501834000 |
| 1  | 6.004717000  | -0.775428000 | -1.962756000 |
| 1  | 5.363213000  | 0.849231000  | -2.131734000 |
| 1  | 5.771594000  | 0.222202000  | -0.536774000 |
| 6  | 3.415206000  | -1.064526000 | -2.757822000 |
| 1  | 4.124905000  | -1.735628000 | -3.251698000 |
| 1  | 2.459628000  | -1.598241000 | -2.686240000 |
| 1  | 3.270372000  | -0.206897000 | -3.424020000 |
| 6  | -2.079557000 | -2.523373000 | -1.928382000 |
| 1  | -2.935611000 | -2.042182000 | -1.432509000 |
| 6  | -1.837265000 | -1.813925000 | -3.257258000 |
| 1  | -0.921259000 | -2.169230000 | -3.747379000 |
| 1  | -2.659033000 | -2.008921000 | -3.953497000 |



|   |              |              |              |
|---|--------------|--------------|--------------|
| 1 | -1.763553000 | -0.728083000 | -3.144034000 |
| 6 | -2.429690000 | -3.983533000 | -2.184980000 |
| 1 | -1.587040000 | -4.543590000 | -2.602126000 |
| 1 | -2.776792000 | -4.512498000 | -1.296888000 |
| 1 | -3.239094000 | -4.039026000 | -2.920009000 |
| 7 | 0.500468000  | 1.501276000  | -3.836093000 |
| 7 | 0.478976000  | 0.521678000  | -3.143793000 |
| 1 | 0.650274000  | -0.410541000 | -3.617651000 |

**d''<sub>SC</sub> -TS1 (TE = -3334.882520)**

|    |              |              |              |
|----|--------------|--------------|--------------|
| 6  | -0.449016000 | 1.801134000  | 0.704367000  |
| 6  | 0.058070000  | 2.797268000  | 1.555885000  |
| 1  | 0.826960000  | 2.530928000  | 2.276595000  |
| 6  | -0.408566000 | 4.105537000  | 1.525497000  |
| 1  | 0.005925000  | 4.837105000  | 2.215183000  |
| 6  | -1.403380000 | 4.480867000  | 0.628107000  |
| 1  | -1.773873000 | 5.501957000  | 0.603220000  |
| 6  | -1.890434000 | 3.540336000  | -0.268845000 |
| 1  | -2.622452000 | 3.827211000  | -1.020794000 |
| 6  | -1.421312000 | 2.226851000  | -0.235203000 |
| 6  | -1.115323000 | -0.484607000 | 1.392228000  |
| 6  | -1.849636000 | -0.017654000 | 2.494392000  |
| 1  | -1.667240000 | 0.994992000  | 2.850962000  |
| 6  | -2.796238000 | -0.802296000 | 3.139095000  |
| 1  | -3.333633000 | -0.403463000 | 3.996218000  |
| 6  | -3.064811000 | -2.090970000 | 2.685823000  |
| 1  | -3.808724000 | -2.709179000 | 3.181118000  |
| 6  | -2.400208000 | -2.567472000 | 1.564437000  |
| 1  | -2.638456000 | -3.548906000 | 1.159905000  |
| 6  | -1.441642000 | -1.772581000 | 0.932362000  |
| 6  | 1.297525000  | 0.170534000  | 1.523480000  |
| 6  | 1.339591000  | 0.150525000  | 2.926434000  |
| 1  | 0.407546000  | 0.233192000  | 3.479408000  |
| 6  | 2.526987000  | 0.034072000  | 3.636767000  |
| 1  | 2.504069000  | 0.024505000  | 4.723906000  |
| 6  | 3.739098000  | -0.073755000 | 2.962947000  |
| 1  | 4.673349000  | -0.169797000 | 3.509454000  |
| 6  | 3.737345000  | -0.097984000 | 1.576847000  |
| 1  | 4.665532000  | -0.244359000 | 1.029735000  |
| 6  | 2.536370000  | 0.022054000  | 0.871157000  |
| 16 | 2.613802000  | -0.312335000 | -0.891759000 |
| 16 | -1.879432000 | 1.143547000  | -1.584445000 |
| 16 | -0.745952000 | -2.357869000 | -0.606095000 |
| 23 | 0.183555000  | -0.212309000 | -1.341276000 |
| 6  | -3.685891000 | 0.649297000  | -1.405418000 |
| 1  | -4.203001000 | 1.494722000  | -1.873118000 |

|   |              |              |              |
|---|--------------|--------------|--------------|
| 6 | 0.457858000  | -3.709289000 | -0.122081000 |
| 1 | -0.209159000 | -4.528782000 | 0.171119000  |
| 6 | 3.046648000  | 1.309344000  | -1.726418000 |
| 1 | 3.293941000  | 0.953268000  | -2.733366000 |
| 6 | 4.254436000  | 1.951402000  | -1.085405000 |
| 1 | 4.529972000  | 2.852862000  | -1.641070000 |
| 1 | 4.049287000  | 2.254305000  | -0.054171000 |
| 1 | 5.120947000  | 1.286581000  | -1.081000000 |
| 6 | 1.847920000  | 2.234827000  | -1.780868000 |
| 1 | 1.534446000  | 2.560014000  | -0.785911000 |
| 1 | 2.084266000  | 3.135574000  | -2.357119000 |
| 1 | 0.980057000  | 1.797443000  | -2.306504000 |
| 6 | -3.863550000 | -0.596626000 | -2.247233000 |
| 1 | -3.517122000 | -0.461777000 | -3.276082000 |
| 1 | -3.330854000 | -1.448214000 | -1.811160000 |
| 1 | -4.923988000 | -0.861076000 | -2.294435000 |
| 6 | -4.138468000 | 0.487210000  | 0.022691000  |
| 1 | -3.869541000 | 1.341734000  | 0.648931000  |
| 1 | -5.230266000 | 0.402198000  | 0.038520000  |
| 1 | -3.730694000 | -0.416743000 | 0.477926000  |
| 6 | 1.212987000  | -4.080988000 | -1.381682000 |
| 1 | 1.853154000  | -4.946278000 | -1.188603000 |
| 1 | 0.546373000  | -4.346091000 | -2.207197000 |
| 1 | 1.863880000  | -3.263838000 | -1.711212000 |
| 6 | 1.355224000  | -3.328267000 | 1.029794000  |
| 1 | 2.080026000  | -2.563508000 | 0.742270000  |
| 1 | 0.797794000  | -2.960993000 | 1.895460000  |
| 1 | 1.920996000  | -4.208066000 | 1.353094000  |
| 6 | -0.011128000 | 0.357868000  | 0.770070000  |
| 7 | 0.497184000  | -0.782437000 | -3.437780000 |
| 7 | 1.262611000  | -0.402862000 | -4.274397000 |
| 1 | -0.211808000 | -1.498204000 | -3.754672000 |

$e''_{SSi}$  -TS1 (TE = -3586.285072)

|   |              |              |             |
|---|--------------|--------------|-------------|
| 6 | -1.074289000 | 0.391152000  | 1.909517000 |
| 6 | -1.761035000 | 1.236062000  | 2.792637000 |
| 1 | -1.814523000 | 2.304291000  | 2.582597000 |
| 6 | -2.388831000 | 0.742869000  | 3.931629000 |
| 1 | -2.912454000 | 1.421581000  | 4.600604000 |
| 6 | -2.358878000 | -0.620830000 | 4.209160000 |
| 1 | -2.857481000 | -1.012138000 | 5.092293000 |
| 6 | -1.706721000 | -1.490883000 | 3.343029000 |
| 1 | -1.700650000 | -2.561089000 | 3.538734000 |
| 6 | -1.068907000 | -0.978953000 | 2.213217000 |
| 6 | 1.293057000  | 2.040392000  | 0.644369000 |
| 6 | 1.411318000  | 3.081364000  | 1.572011000 |

|    |              |              |              |
|----|--------------|--------------|--------------|
| 1  | 0.569538000  | 3.315427000  | 2.222990000  |
| 6  | 2.584684000  | 3.819442000  | 1.692546000  |
| 1  | 2.654749000  | 4.617185000  | 2.427742000  |
| 6  | 3.666634000  | 3.538224000  | 0.865220000  |
| 1  | 4.582981000  | 4.117649000  | 0.944497000  |
| 6  | 3.587143000  | 2.512306000  | -0.071508000 |
| 1  | 4.435608000  | 2.308159000  | -0.719113000 |
| 6  | 2.415520000  | 1.764989000  | -0.152532000 |
| 6  | -1.491241000 | 1.943335000  | -0.698283000 |
| 6  | -1.702780000 | 3.325722000  | -0.627956000 |
| 1  | -1.131007000 | 3.919190000  | 0.085241000  |
| 6  | -2.619327000 | 3.962771000  | -1.458889000 |
| 1  | -2.762168000 | 5.038390000  | -1.386147000 |
| 6  | -3.344027000 | 3.228142000  | -2.392302000 |
| 1  | -4.051472000 | 3.724083000  | -3.051895000 |
| 6  | -3.152014000 | 1.854400000  | -2.495132000 |
| 1  | -3.702268000 | 1.273390000  | -3.231705000 |
| 6  | -2.238026000 | 1.228944000  | -1.648815000 |
| 16 | -2.005256000 | -0.553390000 | -1.839322000 |
| 16 | -0.258976000 | -2.158996000 | 1.117207000  |
| 16 | 2.246458000  | 0.423865000  | -1.350184000 |
| 23 | 0.340632000  | -1.037102000 | -1.053004000 |
| 6  | 1.361962000  | -2.434608000 | 2.017762000  |
| 1  | 1.052396000  | -2.933114000 | 2.944116000  |
| 6  | 3.970457000  | -0.202054000 | -1.695236000 |
| 1  | 4.485960000  | 0.641779000  | -2.167877000 |
| 6  | -3.280020000 | -1.294943000 | -0.673683000 |
| 1  | -2.938690000 | -1.025846000 | 0.332479000  |
| 6  | -3.232423000 | -2.795335000 | -0.874770000 |
| 1  | -3.937467000 | -3.276743000 | -0.190843000 |
| 1  | -3.525102000 | -3.072286000 | -1.892317000 |
| 1  | -2.245923000 | -3.217821000 | -0.672120000 |
| 6  | -4.646174000 | -0.705580000 | -0.936164000 |
| 1  | -4.981910000 | -0.900079000 | -1.959477000 |
| 1  | -5.370429000 | -1.167957000 | -0.258214000 |
| 1  | -4.679422000 | 0.371660000  | -0.762368000 |
| 6  | 2.188388000  | -3.380205000 | 1.172337000  |
| 1  | 1.667860000  | -4.315049000 | 0.954303000  |
| 1  | 2.462231000  | -2.922876000 | 0.213259000  |
| 1  | 3.120068000  | -3.622611000 | 1.692282000  |
| 6  | 2.066198000  | -1.132896000 | 2.324974000  |
| 1  | 1.466948000  | -0.466869000 | 2.950609000  |
| 1  | 2.999699000  | -1.335899000 | 2.860537000  |
| 1  | 2.324350000  | -0.592643000 | 1.408432000  |
| 6  | 4.683198000  | -0.638348000 | -0.433991000 |
| 1  | 5.716543000  | -0.908864000 | -0.673808000 |

|    |              |              |              |
|----|--------------|--------------|--------------|
| 1  | 4.717837000  | 0.141715000  | 0.329619000  |
| 1  | 4.207030000  | -1.519131000 | 0.005712000  |
| 6  | 3.809333000  | -1.326057000 | -2.699412000 |
| 1  | 3.254742000  | -2.169652000 | -2.270418000 |
| 1  | 3.297059000  | -1.004348000 | -3.609877000 |
| 1  | 4.792707000  | -1.704518000 | -2.990664000 |
| 14 | -0.228726000 | 0.968656000  | 0.317158000  |
| 7  | 0.415261000  | -4.110513000 | -1.553574000 |
| 7  | 0.231238000  | -2.988264000 | -1.933800000 |
| 1  | 0.089970000  | -2.881542000 | -2.980337000 |

**f''<sub>SB</sub>-TS1 (TE = -3321.642146)**

|    |              |              |              |
|----|--------------|--------------|--------------|
| 6  | -1.222255000 | 0.344563000  | 1.745427000  |
| 6  | -1.209503000 | 0.871995000  | 3.050760000  |
| 1  | -0.250390000 | 1.070853000  | 3.528387000  |
| 6  | -2.375572000 | 1.132447000  | 3.758639000  |
| 1  | -2.317359000 | 1.525537000  | 4.770776000  |
| 6  | -3.615400000 | 0.904712000  | 3.168362000  |
| 1  | -4.533762000 | 1.119170000  | 3.708577000  |
| 6  | -3.671724000 | 0.430750000  | 1.865981000  |
| 1  | -4.631863000 | 0.293491000  | 1.372858000  |
| 6  | -2.489630000 | 0.145896000  | 1.177364000  |
| 6  | 0.816385000  | -1.428109000 | 1.302529000  |
| 6  | 0.520729000  | -2.126733000 | 2.490258000  |
| 1  | -0.234070000 | -1.719158000 | 3.161677000  |
| 6  | 1.186891000  | -3.291008000 | 2.849508000  |
| 1  | 0.945905000  | -3.785433000 | 3.787507000  |
| 6  | 2.157819000  | -3.828440000 | 2.008475000  |
| 1  | 2.677507000  | -4.743743000 | 2.279596000  |
| 6  | 2.430245000  | -3.212425000 | 0.793252000  |
| 1  | 3.136363000  | -3.660477000 | 0.097625000  |
| 6  | 1.775456000  | -2.029355000 | 0.453449000  |
| 6  | 1.205657000  | 1.220171000  | 0.988581000  |
| 6  | 2.101286000  | 1.405433000  | 2.056233000  |
| 1  | 2.127111000  | 0.667438000  | 2.858280000  |
| 6  | 2.961794000  | 2.495965000  | 2.115354000  |
| 1  | 3.633189000  | 2.609136000  | 2.963327000  |
| 6  | 2.984640000  | 3.426063000  | 1.080345000  |
| 1  | 3.670435000  | 4.268639000  | 1.109833000  |
| 6  | 2.134791000  | 3.261074000  | -0.006722000 |
| 1  | 2.157520000  | 3.963224000  | -0.837216000 |
| 6  | 1.246845000  | 2.184267000  | -0.029206000 |
| 16 | 0.205304000  | 1.996066000  | -1.479475000 |
| 16 | -2.665756000 | -0.346885000 | -0.543381000 |
| 16 | 1.965086000  | -1.409155000 | -1.216968000 |
| 23 | -0.297002000 | -0.403113000 | -1.332907000 |

|   |              |              |              |
|---|--------------|--------------|--------------|
| 6 | -3.263753000 | -2.119718000 | -0.398069000 |
| 1 | -3.986192000 | -2.051927000 | 0.424216000  |
| 6 | 3.695071000  | -0.710415000 | -1.437499000 |
| 1 | 4.283585000  | -1.608461000 | -1.656577000 |
| 6 | -1.363253000 | 2.935877000  | -1.056159000 |
| 1 | -1.804410000 | 2.395974000  | -0.209900000 |
| 6 | -2.249403000 | 2.838563000  | -2.281343000 |
| 1 | -3.229422000 | 3.273285000  | -2.064816000 |
| 1 | -1.824304000 | 3.388544000  | -3.126191000 |
| 1 | -2.416711000 | 1.803513000  | -2.596086000 |
| 6 | -1.040205000 | 4.356348000  | -0.656872000 |
| 1 | -0.535718000 | 4.898934000  | -1.462269000 |
| 1 | -1.969587000 | 4.888766000  | -0.432900000 |
| 1 | -0.413782000 | 4.405150000  | 0.236413000  |
| 6 | -3.971432000 | -2.493169000 | -1.682791000 |
| 1 | -4.779102000 | -1.800357000 | -1.928066000 |
| 1 | -3.282231000 | -2.536895000 | -2.530141000 |
| 1 | -4.407880000 | -3.490855000 | -1.578559000 |
| 6 | -2.138009000 | -3.059711000 | -0.026849000 |
| 1 | -1.628285000 | -2.755663000 | 0.890676000  |
| 1 | -2.531392000 | -4.068895000 | 0.133924000  |
| 1 | -1.394624000 | -3.146531000 | -0.831748000 |
| 6 | 3.628801000  | 0.179436000  | -2.660639000 |
| 1 | 4.635221000  | 0.517991000  | -2.923500000 |
| 1 | 3.219514000  | -0.334172000 | -3.535105000 |
| 1 | 3.023015000  | 1.071312000  | -2.467282000 |
| 6 | 4.231308000  | -0.014252000 | -0.213301000 |
| 1 | 3.748701000  | 0.951059000  | -0.055428000 |
| 1 | 4.119779000  | -0.610213000 | 0.696241000  |
| 1 | 5.301730000  | 0.169843000  | -0.352973000 |
| 5 | 0.187491000  | 0.005585000  | 1.095146000  |
| 7 | -1.097821000 | -2.286364000 | -3.612465000 |
| 7 | -0.751082000 | -1.223817000 | -3.190460000 |
| 1 | -0.522161000 | -0.457482000 | -3.894376000 |

Cartesian coordinates of the intermediate involved during the conversion of **[3-V-H]<sup>+</sup>** to **[3]** along with their total energies (in hartree) including zero point vibrational correction at M06-L-D3(heptane)/6-311+G\* level of theory.

**[3a'<sub>PC</sub>-N<sub>α</sub>-H]<sup>+</sup>** (TE = -3062.505287)

|   |              |              |             |
|---|--------------|--------------|-------------|
| 6 | -0.447155000 | 2.079418000  | 1.775533000 |
| 6 | 0.145767000  | 0.886120000  | 2.536339000 |
| 6 | -2.506027000 | -0.678290000 | 2.013423000 |
| 6 | -1.165921000 | -1.264110000 | 2.410822000 |
| 6 | 2.598419000  | -1.029792000 | 1.773765000 |
| 6 | 1.252627000  | -1.341980000 | 2.405265000 |

|    |              |              |              |
|----|--------------|--------------|--------------|
| 1  | -2.627443000 | 0.336561000  | 2.410039000  |
| 1  | -1.115992000 | -1.327515000 | 3.513520000  |
| 1  | 3.385075000  | -1.711956000 | 2.113691000  |
| 1  | 1.331002000  | -1.238174000 | 3.502501000  |
| 1  | -0.297948000 | 3.020077000  | 2.319508000  |
| 1  | 1.201980000  | 1.127453000  | 2.727335000  |
| 6  | -0.372968000 | 3.455507000  | -0.916975000 |
| 1  | 0.195576000  | 3.374316000  | -1.855883000 |
| 6  | -3.018307000 | -2.329638000 | -0.306476000 |
| 1  | -2.282976000 | -2.927251000 | 0.255835000  |
| 6  | 3.942086000  | -0.507931000 | -0.782737000 |
| 1  | 4.035391000  | 0.520045000  | -0.402981000 |
| 23 | -0.029710000 | -0.278855000 | -0.474423000 |
| 6  | 0.065795000  | -0.515775000 | 1.873055000  |
| 1  | -1.529098000 | 1.977107000  | 1.623906000  |
| 1  | -0.307685000 | 0.851566000  | 3.542522000  |
| 1  | 1.040592000  | -2.408911000 | 2.246896000  |
| 1  | 2.941993000  | -0.018099000 | 2.027375000  |
| 1  | -1.126135000 | -2.312645000 | 2.074824000  |
| 1  | -3.348763000 | -1.259729000 | 2.403869000  |
| 6  | 5.158685000  | -1.297738000 | -0.313261000 |
| 1  | 6.076307000  | -0.812694000 | -0.661445000 |
| 1  | 5.228453000  | -1.378455000 | 0.774763000  |
| 1  | 5.164063000  | -2.310227000 | -0.728713000 |
| 6  | 3.884428000  | -0.453271000 | -2.303837000 |
| 1  | 3.784818000  | -1.453209000 | -2.740366000 |
| 1  | 3.052310000  | 0.143165000  | -2.678309000 |
| 1  | 4.812967000  | -0.030809000 | -2.700558000 |
| 6  | -4.409592000 | -2.774174000 | 0.126618000  |
| 1  | -4.512461000 | -3.856785000 | 0.000090000  |
| 1  | -4.631517000 | -2.549696000 | 1.172746000  |
| 1  | -5.187527000 | -2.311807000 | -0.487761000 |
| 6  | -2.804443000 | -2.613254000 | -1.790277000 |
| 1  | -3.499535000 | -2.052396000 | -2.421533000 |
| 1  | -1.793593000 | -2.375606000 | -2.130307000 |
| 1  | -2.972515000 | -3.674193000 | -2.000600000 |
| 6  | -1.835729000 | 3.179491000  | -1.232718000 |
| 1  | -2.000291000 | 2.157581000  | -1.586199000 |
| 1  | -2.467953000 | 3.336777000  | -0.352417000 |
| 1  | -2.199010000 | 3.862561000  | -2.006482000 |
| 6  | -0.198491000 | 4.861915000  | -0.357041000 |
| 1  | 0.845449000  | 5.174852000  | -0.308914000 |
| 1  | -0.718170000 | 5.585482000  | -0.993626000 |
| 1  | -0.623680000 | 4.958702000  | 0.647324000  |
| 6  | 2.248702000  | -2.919019000 | -0.468566000 |
| 1  | 2.750165000  | -2.984872000 | -1.445205000 |

|    |              |              |              |
|----|--------------|--------------|--------------|
| 6  | 0.788764000  | -3.320154000 | -0.667252000 |
| 1  | 0.207087000  | -3.204670000 | 0.256564000  |
| 1  | 0.305570000  | -2.733204000 | -1.461117000 |
| 1  | 0.693687000  | -4.367921000 | -0.970998000 |
| 6  | 2.944591000  | -3.861714000 | 0.503946000  |
| 1  | 2.924823000  | -4.885458000 | 0.116147000  |
| 1  | 3.990032000  | -3.601733000 | 0.678945000  |
| 1  | 2.444544000  | -3.882985000 | 1.477028000  |
| 6  | -3.939723000 | 0.569793000  | -0.196103000 |
| 1  | -3.482798000 | 1.543946000  | 0.021407000  |
| 6  | -5.164245000 | 0.447710000  | 0.705702000  |
| 1  | -5.733684000 | -0.464825000 | 0.523367000  |
| 1  | -4.913226000 | 0.476680000  | 1.768507000  |
| 1  | -5.840962000 | 1.287302000  | 0.515115000  |
| 6  | -4.326228000 | 0.549454000  | -1.669477000 |
| 1  | -4.904025000 | -0.345819000 | -1.919116000 |
| 1  | -4.955491000 | 1.410452000  | -1.915936000 |
| 1  | -3.460121000 | 0.577410000  | -2.338014000 |
| 6  | 2.116946000  | 2.543446000  | 0.424125000  |
| 1  | 2.548976000  | 1.593324000  | 0.762353000  |
| 6  | 2.381263000  | 3.563181000  | 1.525065000  |
| 1  | 3.460759000  | 3.695162000  | 1.652465000  |
| 1  | 1.964233000  | 4.548210000  | 1.308548000  |
| 1  | 1.984436000  | 3.243978000  | 2.492219000  |
| 6  | 2.788438000  | 2.908708000  | -0.895123000 |
| 1  | 3.874652000  | 2.967118000  | -0.772826000 |
| 1  | 2.586264000  | 2.172520000  | -1.681116000 |
| 1  | 2.460445000  | 3.884238000  | -1.266702000 |
| 15 | -2.535526000 | -0.590630000 | 0.185141000  |
| 15 | 0.336351000  | 2.089100000  | 0.122482000  |
| 15 | 2.344198000  | -1.097814000 | -0.036281000 |
| 7  | 0.617011000  | -0.168727000 | -2.442479000 |
| 7  | -0.601513000 | -0.086261000 | -2.414439000 |
| 1  | -1.125653000 | 0.016385000  | -3.305171000 |

**[3b'** <sub>PSi</sub> **-N<sub>α</sub>-H]<sup>+</sup> (TE = -3313.935780)**

|    |              |              |             |
|----|--------------|--------------|-------------|
| 15 | 1.277434000  | 2.093839000  | 0.080678000 |
| 15 | 1.219626000  | -2.100063000 | 0.264920000 |
| 15 | -2.571188000 | -0.051778000 | 0.124769000 |
| 6  | 1.137391000  | 2.591663000  | 1.855355000 |
| 6  | 1.088672000  | 1.378779000  | 2.775691000 |
| 6  | -2.983621000 | -0.027836000 | 1.926390000 |
| 6  | -1.882958000 | 0.613832000  | 2.761380000 |
| 6  | 1.472418000  | -2.171510000 | 2.097246000 |
| 6  | 0.298747000  | -1.578036000 | 2.867234000 |
| 1  | -3.968649000 | 0.430577000  | 2.076966000 |

|    |              |              |              |
|----|--------------|--------------|--------------|
| 1  | -1.966743000 | 1.706275000  | 2.731523000  |
| 1  | 1.701457000  | -3.203324000 | 2.390376000  |
| 1  | -0.559122000 | -2.260994000 | 2.850131000  |
| 1  | 1.932373000  | 3.305394000  | 2.107041000  |
| 1  | 0.826373000  | 1.688677000  | 3.795945000  |
| 6  | 0.705666000  | 3.645373000  | -0.798600000 |
| 1  | -0.376824000 | 3.659091000  | -0.606642000 |
| 6  | 3.117542000  | 2.057506000  | -0.252611000 |
| 1  | 3.419171000  | 3.109843000  | -0.354134000 |
| 6  | -3.844155000 | -1.250994000 | -0.536743000 |
| 1  | -3.516996000 | -2.223167000 | -0.147090000 |
| 6  | -3.148058000 | 1.589198000  | -0.572413000 |
| 1  | -4.218570000 | 1.480737000  | -0.793814000 |
| 6  | 0.300121000  | -3.691382000 | -0.084880000 |
| 1  | 0.681737000  | -4.412825000 | 0.652117000  |
| 6  | 2.968955000  | -2.350682000 | -0.345090000 |
| 1  | 3.470740000  | -1.462888000 | 0.069762000  |
| 23 | -0.066395000 | -0.029072000 | -0.494494000 |
| 14 | -0.166426000 | 0.107180000  | 2.114018000  |
| 1  | -2.000937000 | 0.341018000  | 3.818208000  |
| 1  | -3.104730000 | -1.085133000 | 2.201545000  |
| 1  | 0.562142000  | -1.470286000 | 3.927843000  |
| 1  | 2.385284000  | -1.591490000 | 2.295643000  |
| 1  | 2.078330000  | 0.914424000  | 2.854675000  |
| 1  | 0.197228000  | 3.156642000  | 1.928829000  |
| 6  | 0.918703000  | 3.576649000  | -2.305351000 |
| 1  | 0.370004000  | 4.380479000  | -2.805855000 |
| 1  | 1.973084000  | 3.705026000  | -2.568165000 |
| 1  | 0.580115000  | 2.631770000  | -2.742846000 |
| 6  | 1.291959000  | 4.929430000  | -0.223193000 |
| 1  | 2.381498000  | 4.969033000  | -0.319867000 |
| 1  | 0.898832000  | 5.794431000  | -0.766962000 |
| 1  | 1.046346000  | 5.074791000  | 0.830656000  |
| 6  | 3.433371000  | 1.321346000  | -1.546904000 |
| 1  | 2.900128000  | 1.716952000  | -2.414114000 |
| 1  | 4.504140000  | 1.375918000  | -1.768648000 |
| 1  | 3.172473000  | 0.264235000  | -1.459066000 |
| 6  | 3.898881000  | 1.448342000  | 0.903799000  |
| 1  | 3.806066000  | 2.017386000  | 1.831302000  |
| 1  | 3.576751000  | 0.420880000  | 1.111338000  |
| 1  | 4.964154000  | 1.403599000  | 0.656323000  |
| 6  | 3.639391000  | -3.584751000 | 0.249944000  |
| 1  | 4.672317000  | -3.658908000 | -0.105188000 |
| 1  | 3.675585000  | -3.565152000 | 1.341118000  |
| 1  | 3.135553000  | -4.509034000 | -0.049611000 |
| 6  | 3.144330000  | -2.307615000 | -1.861179000 |



|   |              |              |              |
|---|--------------|--------------|--------------|
| 1 | 4.181369000  | -2.061693000 | -2.110309000 |
| 1 | 2.928989000  | -3.268763000 | -2.329573000 |
| 1 | 2.510195000  | -1.562680000 | -2.347369000 |
| 6 | 0.528309000  | -4.239764000 | -1.487185000 |
| 1 | 1.538418000  | -4.622009000 | -1.639277000 |
| 1 | -0.158698000 | -5.071226000 | -1.674826000 |
| 1 | 0.327979000  | -3.486110000 | -2.257114000 |
| 6 | -1.193217000 | -3.488268000 | 0.131027000  |
| 1 | -1.439462000 | -3.005023000 | 1.081112000  |
| 1 | -1.595258000 | -2.867556000 | -0.674891000 |
| 1 | -1.721248000 | -4.446880000 | 0.101508000  |
| 6 | -5.248445000 | -0.991663000 | -0.000700000 |
| 1 | -5.946567000 | -1.715627000 | -0.433258000 |
| 1 | -5.316743000 | -1.090454000 | 1.084390000  |
| 1 | -5.623680000 | 0.001180000  | -0.269531000 |
| 6 | -3.839287000 | -1.311647000 | -2.058438000 |
| 1 | -4.474497000 | -2.132346000 | -2.405954000 |
| 1 | -4.251017000 | -0.395921000 | -2.496319000 |
| 1 | -2.840922000 | -1.464114000 | -2.475427000 |
| 6 | -2.406480000 | 1.865264000  | -1.876004000 |
| 1 | -2.532370000 | 1.074692000  | -2.620020000 |
| 1 | -2.735613000 | 2.806309000  | -2.330183000 |
| 1 | -1.326900000 | 1.975084000  | -1.701381000 |
| 6 | -2.975345000 | 2.740425000  | 0.407588000  |
| 1 | -3.581468000 | 2.621646000  | 1.308808000  |
| 1 | -1.931867000 | 2.847454000  | 0.726670000  |
| 1 | -3.268381000 | 3.686698000  | -0.059081000 |
| 7 | -0.507939000 | -0.846554000 | -2.305184000 |
| 7 | 0.453045000  | -0.085641000 | -2.426261000 |
| 1 | 0.874329000  | 0.054921000  | -3.363776000 |

$[3c'_{PB} - N_{\alpha} - H]^+$  (TE = -3049.286752)

|   |              |              |              |
|---|--------------|--------------|--------------|
| 6 | -0.677346000 | 2.047665000  | 2.001431000  |
| 6 | 0.211593000  | 1.142641000  | 2.858128000  |
| 6 | -2.242137000 | -0.982042000 | 2.079836000  |
| 6 | -0.915787000 | -1.400881000 | 2.695788000  |
| 6 | 2.815209000  | -0.522821000 | 1.795382000  |
| 6 | 1.752126000  | -1.078235000 | 2.740908000  |
| 1 | -2.530080000 | 0.017211000  | 2.415191000  |
| 1 | -1.066375000 | -1.561967000 | 3.779462000  |
| 1 | 3.798344000  | -0.961660000 | 1.996942000  |
| 1 | 2.102598000  | -0.903243000 | 3.772344000  |
| 1 | -0.681967000 | 3.071391000  | 2.393350000  |
| 1 | 1.215256000  | 1.590387000  | 2.900686000  |
| 6 | -1.212543000 | 3.375922000  | -0.598805000 |
| 1 | -0.560456000 | 4.257052000  | -0.667728000 |

|    |              |              |              |
|----|--------------|--------------|--------------|
| 6  | -2.518059000 | -2.767440000 | -0.154520000 |
| 1  | -1.761692000 | -3.282341000 | 0.460398000  |
| 6  | 3.817592000  | 0.093381000  | -0.839155000 |
| 1  | 3.734640000  | 1.133314000  | -0.489674000 |
| 23 | 0.012197000  | -0.172460000 | -0.872586000 |
| 1  | -1.724541000 | 1.730358000  | 2.010369000  |
| 1  | -0.150445000 | 1.224558000  | 3.898857000  |
| 1  | 1.706255000  | -2.170874000 | 2.646121000  |
| 1  | 2.937859000  | 0.558886000  | 1.939028000  |
| 1  | -0.633083000 | -2.400123000 | 2.333570000  |
| 1  | -3.065551000 | -1.636740000 | 2.387985000  |
| 6  | 5.196755000  | -0.428050000 | -0.452829000 |
| 1  | 5.971346000  | 0.212815000  | -0.886039000 |
| 1  | 5.369041000  | -0.450960000 | 0.625678000  |
| 1  | 5.369869000  | -1.434962000 | -0.844849000 |
| 6  | 3.660003000  | 0.086907000  | -2.353951000 |
| 1  | 3.661934000  | -0.931841000 | -2.759154000 |
| 1  | 2.738106000  | 0.569840000  | -2.681378000 |
| 1  | 4.494836000  | 0.613501000  | -2.826455000 |
| 6  | -3.893377000 | -3.263975000 | 0.276006000  |
| 1  | -3.946183000 | -4.352679000 | 0.172800000  |
| 1  | -4.138531000 | -3.031269000 | 1.315008000  |
| 1  | -4.685801000 | -2.850492000 | -0.354294000 |
| 6  | -2.255404000 | -3.130100000 | -1.611726000 |
| 1  | -2.980337000 | -2.670419000 | -2.287648000 |
| 1  | -1.264877000 | -2.826150000 | -1.955859000 |
| 1  | -2.328251000 | -4.213644000 | -1.749649000 |
| 6  | -1.564214000 | 2.948518000  | -2.019308000 |
| 1  | -0.677261000 | 2.687119000  | -2.605553000 |
| 1  | -2.225532000 | 2.075927000  | -2.034187000 |
| 1  | -2.078707000 | 3.756876000  | -2.548384000 |
| 6  | -2.445465000 | 3.794921000  | 0.191765000  |
| 1  | -2.197427000 | 4.218410000  | 1.167854000  |
| 1  | -2.995332000 | 4.562528000  | -0.361754000 |
| 1  | -3.145465000 | 2.970256000  | 0.359768000  |
| 6  | 2.707371000  | -2.585975000 | -0.315426000 |
| 1  | 3.181768000  | -2.590763000 | -1.308532000 |
| 6  | 1.390137000  | -3.344845000 | -0.425950000 |
| 1  | 0.801337000  | -3.274863000 | 0.497002000  |
| 1  | 0.768965000  | -2.965818000 | -1.244026000 |
| 1  | 1.561822000  | -4.408258000 | -0.621873000 |
| 6  | 3.646323000  | -3.273849000 | 0.668359000  |
| 1  | 3.861269000  | -4.291766000 | 0.327433000  |
| 1  | 4.604525000  | -2.765049000 | 0.784592000  |
| 1  | 3.198738000  | -3.362736000 | 1.662455000  |
| 6  | -3.619784000 | 0.067930000  | -0.270850000 |

|    |              |              |              |
|----|--------------|--------------|--------------|
| 1  | -3.183375000 | 1.077193000  | -0.233825000 |
| 6  | -4.814573000 | 0.053923000  | 0.676194000  |
| 1  | -5.295157000 | -0.925818000 | 0.728716000  |
| 1  | -4.558433000 | 0.351478000  | 1.695876000  |
| 1  | -5.572465000 | 0.760005000  | 0.320156000  |
| 6  | -4.049486000 | -0.183419000 | -1.712047000 |
| 1  | -4.591060000 | -1.129206000 | -1.809351000 |
| 1  | -4.735959000 | 0.603815000  | -2.040622000 |
| 1  | -3.210219000 | -0.205420000 | -2.410573000 |
| 6  | 1.516178000  | 2.921873000  | 0.299528000  |
| 1  | 2.186567000  | 2.167645000  | 0.735764000  |
| 6  | 1.554000000  | 4.162478000  | 1.180039000  |
| 1  | 2.540029000  | 4.635156000  | 1.129407000  |
| 1  | 0.827209000  | 4.918059000  | 0.862459000  |
| 1  | 1.359698000  | 3.938657000  | 2.232006000  |
| 6  | 1.989184000  | 3.218759000  | -1.119301000 |
| 1  | 3.035261000  | 3.540993000  | -1.124219000 |
| 1  | 1.910107000  | 2.346402000  | -1.776682000 |
| 1  | 1.410125000  | 4.025984000  | -1.579526000 |
| 15 | -2.155306000 | -0.974646000 | 0.233203000  |
| 15 | -0.145305000 | 2.075023000  | 0.241037000  |
| 15 | 2.391512000  | -0.765246000 | 0.014105000  |
| 5  | 0.318427000  | -0.425508000 | 2.635231000  |
| 7  | -0.809446000 | -0.387507000 | -2.704791000 |
| 7  | 0.420851000  | -0.470649000 | -2.806483000 |
| 1  | 0.831275000  | -0.662231000 | -3.739379000 |

**[3d'<sub>sc</sub>-N<sub>α</sub>-H]<sup>+</sup> (TE = -2877.655083)**

|   |              |              |              |
|---|--------------|--------------|--------------|
| 6 | 0.089362000  | 1.504321000  | 2.081310000  |
| 6 | 0.245722000  | 0.076145000  | 2.582687000  |
| 6 | -2.669273000 | -0.424695000 | 1.769802000  |
| 6 | -1.627805000 | -1.494393000 | 1.984911000  |
| 6 | 2.107816000  | -2.101931000 | 1.339537000  |
| 6 | 0.688281000  | -2.276670000 | 1.827001000  |
| 1 | -2.520414000 | 0.443685000  | 2.417523000  |
| 1 | -1.679417000 | -1.828759000 | 3.037780000  |
| 1 | 2.710991000  | -3.005414000 | 1.459361000  |
| 1 | 0.730575000  | -2.566740000 | 2.892626000  |
| 1 | 0.528514000  | 2.232637000  | 2.769384000  |
| 1 | 1.304340000  | -0.054558000 | 2.842813000  |
| 6 | 0.504119000  | 3.240305000  | -0.233284000 |
| 1 | 1.039772000  | 3.208657000  | -1.191605000 |
| 6 | -3.538421000 | -1.177523000 | -0.774885000 |
| 1 | -3.475571000 | -2.012321000 | -0.066904000 |
| 6 | 3.557007000  | -0.607383000 | -0.593423000 |
| 1 | 3.487183000  | 0.100393000  | 0.241841000  |

|    |              |              |              |
|----|--------------|--------------|--------------|
| 23 | -0.112503000 | -0.350457000 | -0.529429000 |
| 16 | -2.541971000 | 0.179099000  | 0.047911000  |
| 16 | 0.974966000  | 1.592566000  | 0.484982000  |
| 16 | 2.036629000  | -1.663354000 | -0.433117000 |
| 6  | -0.208308000 | -1.047817000 | 1.620850000  |
| 1  | -0.951664000 | 1.789470000  | 1.903613000  |
| 1  | -0.284387000 | 0.003779000  | 3.547466000  |
| 1  | 0.245386000  | -3.145628000 | 1.319168000  |
| 1  | 2.625823000  | -1.281973000 | 1.849384000  |
| 1  | -1.900331000 | -2.381339000 | 1.392555000  |
| 1  | -3.697236000 | -0.763763000 | 1.932834000  |
| 6  | 4.788799000  | -1.477800000 | -0.447329000 |
| 1  | 5.687248000  | -0.853910000 | -0.485918000 |
| 1  | 4.809946000  | -2.017333000 | 0.502378000  |
| 1  | 4.860322000  | -2.211971000 | -1.254577000 |
| 6  | 3.520724000  | 0.148773000  | -1.903832000 |
| 1  | 3.441914000  | -0.524848000 | -2.763437000 |
| 1  | 2.692624000  | 0.861442000  | -1.943370000 |
| 1  | 4.447544000  | 0.716590000  | -2.025026000 |
| 6  | -4.975240000 | -0.716961000 | -0.909554000 |
| 1  | -5.595384000 | -1.531428000 | -1.297464000 |
| 1  | -5.401194000 | -0.406166000 | 0.047378000  |
| 1  | -5.059998000 | 0.124621000  | -1.602294000 |
| 6  | -2.929649000 | -1.594271000 | -2.096505000 |
| 1  | -2.844448000 | -0.758539000 | -2.796240000 |
| 1  | -1.936614000 | -2.047557000 | -1.983327000 |
| 1  | -3.563097000 | -2.351092000 | -2.569130000 |
| 6  | -0.981245000 | 3.388573000  | -0.480336000 |
| 1  | -1.376761000 | 2.612335000  | -1.137043000 |
| 1  | -1.555379000 | 3.374464000  | 0.451022000  |
| 1  | -1.175038000 | 4.355755000  | -0.954764000 |
| 6  | 1.076580000  | 4.346090000  | 0.633142000  |
| 1  | 2.146487000  | 4.224152000  | 0.814239000  |
| 1  | 0.928400000  | 5.312887000  | 0.143283000  |
| 1  | 0.570528000  | 4.399544000  | 1.601617000  |
| 7  | -0.740855000 | 0.528826000  | -2.303546000 |
| 7  | 0.334309000  | -0.016905000 | -2.482212000 |
| 1  | 0.787952000  | 0.018436000  | -3.414969000 |

$[3e'_{\text{ssi}} - N_{\alpha} - H]^+$  (TE = -3129.067888)

|   |              |              |             |
|---|--------------|--------------|-------------|
| 6 | -0.860415000 | 0.136164000  | 2.379905000 |
| 6 | -0.030099000 | -1.124486000 | 2.545960000 |
| 6 | -2.255091000 | -2.556080000 | 0.412749000 |
| 6 | -0.940689000 | -3.295659000 | 0.613001000 |
| 6 | 3.108226000  | -1.337948000 | 0.749182000 |
| 6 | 2.226119000  | -2.552603000 | 1.017983000 |

|    |              |              |              |
|----|--------------|--------------|--------------|
| 1  | -2.590252000 | -2.063051000 | 1.333017000  |
| 1  | -1.058395000 | -3.981669000 | 1.461203000  |
| 1  | 4.167380000  | -1.595114000 | 0.661889000  |
| 1  | 2.482063000  | -2.960730000 | 2.003452000  |
| 1  | -1.001211000 | 0.682269000  | 3.317330000  |
| 1  | 0.894929000  | -0.876974000 | 3.082618000  |
| 6  | -1.172418000 | 2.642476000  | 0.918362000  |
| 6  | -3.620687000 | -0.257199000 | -0.710954000 |
| 6  | 3.748477000  | 0.839872000  | -1.108001000 |
| 23 | 0.172218000  | -0.145386000 | -0.847006000 |
| 16 | -2.063637000 | -1.253452000 | -0.888169000 |
| 16 | 0.026879000  | 1.252041000  | 1.224520000  |
| 16 | 2.601605000  | -0.599894000 | -0.863315000 |
| 1  | -1.849532000 | -0.069821000 | 1.955729000  |
| 1  | -0.572979000 | -1.815364000 | 3.205035000  |
| 1  | 2.451165000  | -3.339490000 | 0.289303000  |
| 1  | 3.007493000  | -0.575039000 | 1.530006000  |
| 1  | -0.724862000 | -3.920245000 | -0.261120000 |
| 1  | -3.062557000 | -3.209737000 | 0.072761000  |
| 14 | 0.413929000  | -1.993261000 | 0.890909000  |
| 1  | 3.520525000  | 1.108324000  | -2.147559000 |
| 1  | -1.875349000 | 2.262074000  | 0.166853000  |
| 1  | -3.567730000 | 0.201809000  | 0.287024000  |
| 6  | 5.197631000  | 0.406118000  | -1.007109000 |
| 1  | 5.848700000  | 1.220889000  | -1.337882000 |
| 1  | 5.481214000  | 0.174067000  | 0.023350000  |
| 1  | 5.416224000  | -0.465804000 | -1.627431000 |
| 6  | 3.407503000  | 1.998382000  | -0.193238000 |
| 1  | 3.530162000  | 1.736972000  | 0.862208000  |
| 1  | 4.072736000  | 2.843984000  | -0.395610000 |
| 1  | 2.379343000  | 2.342714000  | -0.332796000 |
| 6  | -3.588728000 | 0.818775000  | -1.778513000 |
| 1  | -4.470070000 | 1.459931000  | -1.688508000 |
| 1  | -2.705153000 | 1.458298000  | -1.698332000 |
| 1  | -3.597262000 | 0.386127000  | -2.783325000 |
| 6  | -4.847629000 | -1.139789000 | -0.813206000 |
| 1  | -5.749197000 | -0.522507000 | -0.750750000 |
| 1  | -4.877969000 | -1.672252000 | -1.768105000 |
| 1  | -4.907886000 | -1.876891000 | -0.010259000 |
| 6  | -1.916249000 | 3.030057000  | 2.178967000  |
| 1  | -2.556267000 | 3.892348000  | 1.968576000  |
| 1  | -2.562581000 | 2.233884000  | 2.554151000  |
| 1  | -1.231207000 | 3.323312000  | 2.980175000  |
| 6  | -0.370542000 | 3.794876000  | 0.345088000  |
| 1  | -1.040766000 | 4.608422000  | 0.052484000  |
| 1  | 0.331192000  | 4.194027000  | 1.083159000  |

|   |              |             |              |
|---|--------------|-------------|--------------|
| 1 | 0.204538000  | 3.505127000 | -0.536960000 |
| 7 | 0.160869000  | 0.406976000 | -2.749426000 |
| 7 | -0.061791000 | 1.457838000 | -2.162017000 |
| 1 | -0.207714000 | 2.315664000 | -2.724694000 |

**[3f<sub>SB</sub>-N<sub>α</sub>-H]<sup>+</sup> (TE = -3129.067888)**

|    |              |              |              |
|----|--------------|--------------|--------------|
| 6  | 0.345627000  | 1.822670000  | 2.038798000  |
| 6  | 0.535913000  | 0.415992000  | 2.584363000  |
| 6  | -2.744013000 | 0.374876000  | 1.319978000  |
| 6  | -2.056937000 | -0.486872000 | 2.368393000  |
| 6  | 1.422365000  | -2.415917000 | 1.529585000  |
| 6  | -0.003415000 | -2.200535000 | 1.986433000  |
| 1  | -2.448686000 | 1.425082000  | 1.381495000  |
| 1  | -2.245085000 | -0.002840000 | 3.339840000  |
| 1  | 1.704940000  | -3.471361000 | 1.499462000  |
| 1  | -0.130837000 | -2.705506000 | 2.961338000  |
| 1  | 0.960326000  | 2.553941000  | 2.570593000  |
| 1  | 1.580113000  | 0.119584000  | 2.420414000  |
| 6  | 0.236973000  | 3.473570000  | -0.347762000 |
| 1  | 0.678670000  | 3.499103000  | -1.351834000 |
| 6  | -2.925969000 | -1.819831000 | -0.522786000 |
| 1  | -2.526766000 | -2.314459000 | 0.369695000  |
| 6  | 3.409858000  | -1.091540000 | -0.023198000 |
| 1  | 3.379587000  | -0.405086000 | 0.834242000  |
| 23 | 0.066316000  | -0.024232000 | -1.050506000 |
| 16 | -2.369319000 | -0.054374000 | -0.418864000 |
| 16 | 0.905140000  | 1.861696000  | 0.290582000  |
| 16 | 1.673846000  | -1.742749000 | -0.166945000 |
| 1  | -0.692528000 | 2.162550000  | 2.090441000  |
| 1  | 0.449202000  | 0.490309000  | 3.683263000  |
| 1  | -0.694330000 | -2.755527000 | 1.336063000  |
| 1  | 2.141188000  | -1.903000000 | 2.176250000  |
| 1  | -2.582554000 | -1.449386000 | 2.429681000  |
| 1  | -3.833944000 | 0.364364000  | 1.420061000  |
| 6  | 4.365852000  | -2.235093000 | 0.248122000  |
| 1  | 5.379737000  | -1.845036000 | 0.381224000  |
| 1  | 4.113638000  | -2.793440000 | 1.152507000  |
| 1  | 4.388580000  | -2.939764000 | -0.587848000 |
| 6  | 3.760633000  | -0.325321000 | -1.280515000 |
| 1  | 3.687876000  | -0.957427000 | -2.171351000 |
| 1  | 3.119344000  | 0.546966000  | -1.425712000 |
| 1  | 4.793525000  | 0.028686000  | -1.215968000 |
| 6  | -4.438037000 | -1.895966000 | -0.527641000 |
| 1  | -4.760292000 | -2.941427000 | -0.561468000 |
| 1  | -4.879699000 | -1.452258000 | 0.368423000  |
| 1  | -4.862114000 | -1.388519000 | -1.398328000 |

|   |              |              |              |
|---|--------------|--------------|--------------|
| 6 | -2.289649000 | -2.423554000 | -1.760202000 |
| 1 | -2.545588000 | -1.866578000 | -2.667196000 |
| 1 | -1.196122000 | -2.467972000 | -1.678380000 |
| 1 | -2.634434000 | -3.451592000 | -1.901554000 |
| 6 | -1.272945000 | 3.479593000  | -0.458222000 |
| 1 | -1.649233000 | 2.658571000  | -1.073545000 |
| 1 | -1.753064000 | 3.432378000  | 0.524759000  |
| 1 | -1.605241000 | 4.414315000  | -0.920369000 |
| 6 | 0.779933000  | 4.623383000  | 0.478249000  |
| 1 | 1.868332000  | 4.597894000  | 0.564691000  |
| 1 | 0.504588000  | 5.573859000  | 0.012093000  |
| 1 | 0.357033000  | 4.631510000  | 1.487256000  |
| 5 | -0.495595000 | -0.720886000 | 2.208076000  |
| 7 | -0.326318000 | 0.780554000  | -2.865319000 |
| 7 | 0.812759000  | 0.304773000  | -2.884513000 |
| 1 | 1.369654000  | 0.370657000  | -3.758096000 |

[3a''<sub>PC</sub>-N<sub>α</sub>-H]<sup>+</sup> (TE = -3519.773774)

|   |              |              |             |
|---|--------------|--------------|-------------|
| 6 | 1.319954000  | 0.450291000  | 1.722382000 |
| 6 | 1.275400000  | 1.164615000  | 2.928839000 |
| 1 | 0.323063000  | 1.283290000  | 3.440638000 |
| 6 | 2.417599000  | 1.716872000  | 3.496982000 |
| 1 | 2.339883000  | 2.267858000  | 4.431785000 |
| 6 | 3.655312000  | 1.556745000  | 2.883937000 |
| 1 | 4.552708000  | 1.981350000  | 3.326367000 |
| 6 | 3.729161000  | 0.861817000  | 1.683004000 |
| 1 | 4.692411000  | 0.768107000  | 1.185386000 |
| 6 | 2.581623000  | 0.324640000  | 1.090188000 |
| 6 | -1.188755000 | 0.381472000  | 1.719332000 |
| 6 | -1.852450000 | -0.213118000 | 2.803543000 |
| 1 | -1.441897000 | -1.115255000 | 3.250951000 |
| 6 | -3.032423000 | 0.310184000  | 3.316718000 |
| 1 | -3.522883000 | -0.184275000 | 4.152321000 |
| 6 | -3.586437000 | 1.457018000  | 2.759671000 |
| 1 | -4.516087000 | 1.868133000  | 3.144778000 |
| 6 | -2.942958000 | 2.071577000  | 1.692923000 |
| 1 | -3.396209000 | 2.953353000  | 1.251982000 |
| 6 | -1.755557000 | 1.548284000  | 1.169611000 |
| 6 | 0.063484000  | -1.696615000 | 1.406358000 |
| 6 | 0.771672000  | -2.298686000 | 2.452185000 |
| 1 | 1.460575000  | -1.699397000 | 3.045113000 |
| 6 | 0.602658000  | -3.644998000 | 2.756484000 |
| 1 | 1.168766000  | -4.087034000 | 3.573665000 |
| 6 | -0.294429000 | -4.423969000 | 2.033100000 |
| 1 | -0.432065000 | -5.474860000 | 2.274113000 |
| 6 | -1.020337000 | -3.844388000 | 0.997515000 |

|    |              |              |              |
|----|--------------|--------------|--------------|
| 1  | -1.729907000 | -4.450373000 | 0.440150000  |
| 6  | -0.842007000 | -2.497681000 | 0.673023000  |
| 6  | 0.088420000  | -0.208041000 | 1.143674000  |
| 23 | 0.112152000  | 0.063396000  | -1.188595000 |
| 6  | 3.785034000  | 0.775468000  | -1.521862000 |
| 1  | 4.715113000  | 0.791076000  | -0.939588000 |
| 6  | -2.352247000 | 3.007606000  | -1.285319000 |
| 1  | -3.195417000 | 2.330659000  | -1.079453000 |
| 6  | -1.635501000 | -2.769992000 | -2.198366000 |
| 1  | -1.922689000 | -2.074899000 | -3.001905000 |
| 6  | -2.595697000 | -3.951817000 | -2.234001000 |
| 1  | -2.513334000 | -4.462725000 | -3.199364000 |
| 1  | -2.374375000 | -4.698209000 | -1.467039000 |
| 1  | -3.640054000 | -3.657145000 | -2.120842000 |
| 6  | -0.203600000 | -3.226014000 | -2.464754000 |
| 1  | 0.132600000  | -3.948817000 | -1.714779000 |
| 1  | -0.126322000 | -3.709262000 | -3.443577000 |
| 1  | 0.522736000  | -2.400037000 | -2.461814000 |
| 6  | 4.093986000  | 0.220800000  | -2.908199000 |
| 1  | 4.680982000  | -0.699744000 | -2.877920000 |
| 1  | 3.184076000  | 0.004996000  | -3.478951000 |
| 1  | 4.670724000  | 0.947932000  | -3.487771000 |
| 6  | 3.246212000  | 2.192675000  | -1.596322000 |
| 1  | 3.044578000  | 2.611322000  | -0.606326000 |
| 1  | 3.960206000  | 2.856832000  | -2.093579000 |
| 1  | 2.314547000  | 2.225814000  | -2.168495000 |
| 6  | -2.750828000 | 4.412162000  | -0.832838000 |
| 1  | -3.694614000 | 4.691070000  | -1.312643000 |
| 1  | -2.894412000 | 4.517609000  | 0.242530000  |
| 1  | -2.016757000 | 5.161948000  | -1.135089000 |
| 6  | -2.104958000 | 3.001199000  | -2.790388000 |
| 1  | -1.204462000 | 3.562512000  | -3.060914000 |
| 1  | -2.004926000 | 1.992698000  | -3.195672000 |
| 1  | -2.942540000 | 3.478908000  | -3.308563000 |
| 15 | -1.636566000 | -1.640565000 | -0.717285000 |
| 15 | -0.964316000 | 2.173448000  | -0.341701000 |
| 15 | 2.591107000  | -0.328588000 | -0.607816000 |
| 6  | 0.282576000  | 3.467393000  | 0.185139000  |
| 1  | 1.137601000  | 2.842347000  | 0.481049000  |
| 6  | 0.720137000  | 4.340585000  | -0.986763000 |
| 1  | -0.023221000 | 5.102473000  | -1.230107000 |
| 1  | 1.646079000  | 4.869735000  | -0.740242000 |
| 1  | 0.911299000  | 3.769696000  | -1.899085000 |
| 6  | -0.115748000 | 4.293091000  | 1.400569000  |
| 1  | 0.733088000  | 4.904254000  | 1.725583000  |
| 1  | -0.940173000 | 4.978133000  | 1.187924000  |



|   |              |              |              |
|---|--------------|--------------|--------------|
| 1 | -0.409177000 | 3.667791000  | 2.247553000  |
| 6 | 3.481548000  | -1.970850000 | -0.710541000 |
| 1 | 3.476422000  | -2.168686000 | -1.792751000 |
| 6 | 2.760350000  | -3.112933000 | -0.016672000 |
| 1 | 2.840851000  | -3.027264000 | 1.068658000  |
| 1 | 1.697232000  | -3.165650000 | -0.260969000 |
| 1 | 3.217087000  | -4.066393000 | -0.300749000 |
| 6 | 4.923982000  | -1.890938000 | -0.225283000 |
| 1 | 5.407704000  | -2.866393000 | -0.338747000 |
| 1 | 5.534630000  | -1.167602000 | -0.770127000 |
| 1 | 4.969526000  | -1.638218000 | 0.838990000  |
| 6 | -3.403646000 | -1.239897000 | -0.299892000 |
| 1 | -3.307656000 | -0.375881000 | 0.368521000  |
| 6 | -4.139931000 | -2.328511000 | 0.468503000  |
| 1 | -5.135141000 | -1.971962000 | 0.754441000  |
| 1 | -4.281758000 | -3.242429000 | -0.114087000 |
| 1 | -3.616334000 | -2.598535000 | 1.389750000  |
| 6 | -4.135011000 | -0.773910000 | -1.554797000 |
| 1 | -5.102889000 | -0.338038000 | -1.288437000 |
| 1 | -3.570677000 | -0.012662000 | -2.104451000 |
| 1 | -4.336177000 | -1.593524000 | -2.250552000 |
| 7 | -0.689039000 | 0.134726000  | -3.047152000 |
| 7 | 0.482447000  | 0.501416000  | -3.115938000 |
| 1 | 0.891433000  | 0.717045000  | -4.042410000 |

**[3b''<sub>PSi</sub>-N<sub>α</sub>-H]<sup>+</sup> (TE = -3771.191923)**

|   |              |              |             |
|---|--------------|--------------|-------------|
| 6 | -1.764986000 | -0.739214000 | 1.935395000 |
| 6 | -1.959322000 | -1.071675000 | 3.281597000 |
| 1 | -1.143836000 | -0.944868000 | 3.993884000 |
| 6 | -3.177864000 | -1.573716000 | 3.725443000 |
| 1 | -3.312116000 | -1.833914000 | 4.773075000 |
| 6 | -4.227387000 | -1.750301000 | 2.826515000 |
| 1 | -5.179714000 | -2.146360000 | 3.170881000 |
| 6 | -4.052877000 | -1.440049000 | 1.482965000 |
| 1 | -4.870688000 | -1.617939000 | 0.786890000 |
| 6 | -2.825604000 | -0.940265000 | 1.032869000 |
| 6 | 1.363744000  | -0.427371000 | 2.112493000 |
| 6 | 1.693542000  | 0.036979000  | 3.391667000 |
| 1 | 0.965968000  | 0.616711000  | 3.960307000 |
| 6 | 2.954036000  | -0.182124000 | 3.936803000 |
| 1 | 3.194992000  | 0.196734000  | 4.927442000 |
| 6 | 3.917285000  | -0.859077000 | 3.195551000 |
| 1 | 4.914387000  | -1.009801000 | 3.602436000 |
| 6 | 3.612404000  | -1.338441000 | 1.926017000 |
| 1 | 4.388422000  | -1.846410000 | 1.362158000 |
| 6 | 2.337583000  | -1.139427000 | 1.386142000 |

|    |              |              |              |
|----|--------------|--------------|--------------|
| 6  | -0.392466000 | 1.926752000  | 1.564521000  |
| 6  | -1.040737000 | 2.463096000  | 2.681880000  |
| 1  | -1.497992000 | 1.794736000  | 3.412324000  |
| 6  | -1.145420000 | 3.838497000  | 2.859476000  |
| 1  | -1.668313000 | 4.239288000  | 3.725110000  |
| 6  | -0.585982000 | 4.704420000  | 1.923573000  |
| 1  | -0.665506000 | 5.780476000  | 2.057847000  |
| 6  | 0.073604000  | 4.194733000  | 0.810855000  |
| 1  | 0.509524000  | 4.884038000  | 0.093518000  |
| 6  | 0.162588000  | 2.812124000  | 0.621481000  |
| 23 | -0.020369000 | -0.253539000 | -1.322359000 |
| 6  | -3.284807000 | -2.043691000 | -1.588948000 |
| 1  | -4.349750000 | -1.953319000 | -1.336867000 |
| 6  | 3.423377000  | -2.125751000 | -1.158067000 |
| 1  | 4.065705000  | -1.277110000 | -0.875868000 |
| 6  | 0.744651000  | 3.101963000  | -2.320674000 |
| 1  | 1.084541000  | 2.434723000  | -3.127974000 |
| 6  | 1.567122000  | 4.382810000  | -2.418253000 |
| 1  | 1.405726000  | 4.838283000  | -3.401115000 |
| 1  | 1.276969000  | 5.132780000  | -1.679257000 |
| 1  | 2.640325000  | 4.217888000  | -2.318073000 |
| 6  | -0.738063000 | 3.384940000  | -2.539375000 |
| 1  | -1.142409000 | 4.033449000  | -1.755432000 |
| 1  | -0.890147000 | 3.895838000  | -3.495007000 |
| 1  | -1.339824000 | 2.471628000  | -2.556431000 |
| 6  | -3.128703000 | -1.945546000 | -3.099374000 |
| 1  | -3.437696000 | -0.977695000 | -3.503984000 |
| 1  | -2.087841000 | -2.101273000 | -3.404006000 |
| 1  | -3.725601000 | -2.716840000 | -3.595998000 |
| 6  | -2.785694000 | -3.378554000 | -1.061118000 |
| 1  | -2.925045000 | -3.486847000 | 0.017526000  |
| 1  | -3.319021000 | -4.201736000 | -1.546946000 |
| 1  | -1.724606000 | -3.517329000 | -1.275303000 |
| 6  | 4.127806000  | -3.414980000 | -0.737010000 |
| 1  | 5.135373000  | -3.436439000 | -1.165238000 |
| 1  | 4.231825000  | -3.538221000 | 0.341050000  |
| 1  | 3.612341000  | -4.301361000 | -1.114445000 |
| 6  | 3.264675000  | -2.098124000 | -2.675126000 |
| 1  | 2.577125000  | -2.871058000 | -3.031930000 |
| 1  | 2.896254000  | -1.137036000 | -3.036366000 |
| 1  | 4.229568000  | -2.282471000 | -3.157848000 |
| 15 | 0.953737000  | 2.009018000  | -0.815533000 |
| 15 | 1.821415000  | -1.703416000 | -0.279510000 |
| 15 | -2.469474000 | -0.600494000 | -0.730648000 |
| 6  | 0.890338000  | -3.303849000 | 0.034617000  |
| 1  | -0.099324000 | -2.927737000 | 0.343262000  |

|    |              |              |              |
|----|--------------|--------------|--------------|
| 6  | 0.712610000  | -4.074530000 | -1.269715000 |
| 1  | 1.650262000  | -4.511826000 | -1.620399000 |
| 1  | 0.011370000  | -4.903680000 | -1.135014000 |
| 1  | 0.324652000  | -3.447911000 | -2.083299000 |
| 6  | 1.412890000  | -4.183353000 | 1.160833000  |
| 1  | 0.704047000  | -4.995672000 | 1.352629000  |
| 1  | 2.371780000  | -4.647401000 | 0.920844000  |
| 1  | 1.533086000  | -3.629762000 | 2.095591000  |
| 6  | -3.528178000 | 0.854194000  | -1.248359000 |
| 1  | -3.141927000 | 1.097719000  | -2.249565000 |
| 6  | -3.281747000 | 2.039733000  | -0.325707000 |
| 1  | -3.623208000 | 1.832131000  | 0.694386000  |
| 1  | -2.228344000 | 2.315010000  | -0.265559000 |
| 1  | -3.830422000 | 2.917499000  | -0.681686000 |
| 6  | -5.018388000 | 0.560367000  | -1.356945000 |
| 1  | -5.549409000 | 1.472257000  | -1.648216000 |
| 1  | -5.260537000 | -0.198223000 | -2.104399000 |
| 1  | -5.443393000 | 0.244557000  | -0.398792000 |
| 6  | 2.772538000  | 1.942724000  | -0.404814000 |
| 1  | 2.816867000  | 1.095850000  | 0.292674000  |
| 6  | 3.321506000  | 3.155790000  | 0.333395000  |
| 1  | 4.374240000  | 2.989180000  | 0.584755000  |
| 1  | 3.274235000  | 4.074748000  | -0.256214000 |
| 1  | 2.789472000  | 3.336261000  | 1.270746000  |
| 6  | 3.583770000  | 1.569365000  | -1.639332000 |
| 1  | 4.608244000  | 1.302627000  | -1.360336000 |
| 1  | 3.152593000  | 0.711028000  | -2.165502000 |
| 1  | 3.655361000  | 2.389436000  | -2.359055000 |
| 14 | -0.223991000 | 0.070902000  | 1.203746000  |
| 7  | -0.705139000 | 0.092582000  | -3.202165000 |
| 7  | 0.448947000  | -0.340077000 | -3.258843000 |
| 1  | 0.886874000  | -0.490714000 | -4.186594000 |

$[3c''_{PB} - N_{\alpha} - H]^+$  (TE = -3506.525989)

|   |              |              |             |
|---|--------------|--------------|-------------|
| 6 | 0.926998000  | -1.417638000 | 1.771980000 |
| 6 | 0.635568000  | -2.261648000 | 2.857022000 |
| 1 | -0.313311000 | -2.144317000 | 3.379885000 |
| 6 | 1.535189000  | -3.226861000 | 3.297959000 |
| 1 | 1.279443000  | -3.862547000 | 4.142613000 |
| 6 | 2.762062000  | -3.372737000 | 2.661080000 |
| 1 | 3.476175000  | -4.117573000 | 3.003589000 |
| 6 | 3.062366000  | -2.574748000 | 1.561705000 |
| 1 | 4.011673000  | -2.718081000 | 1.051475000 |
| 6 | 2.154608000  | -1.617633000 | 1.104452000 |
| 6 | 0.510861000  | 1.249769000  | 1.895019000 |
| 6 | 1.215567000  | 1.358030000  | 3.105825000 |

|    |              |              |              |
|----|--------------|--------------|--------------|
| 1  | 1.523382000  | 0.448828000  | 3.622489000  |
| 6  | 1.516980000  | 2.591028000  | 3.673769000  |
| 1  | 2.061287000  | 2.637062000  | 4.614392000  |
| 6  | 1.121800000  | 3.762612000  | 3.038320000  |
| 1  | 1.348610000  | 4.731553000  | 3.476164000  |
| 6  | 0.446059000  | 3.688263000  | 1.825194000  |
| 1  | 0.160187000  | 4.609088000  | 1.322019000  |
| 6  | 0.147798000  | 2.451635000  | 1.247086000  |
| 6  | -1.583148000 | -0.395937000 | 1.749586000  |
| 6  | -2.079232000 | 0.008428000  | 3.002010000  |
| 1  | -1.408039000 | 0.507953000  | 3.700823000  |
| 6  | -3.401874000 | -0.195754000 | 3.372302000  |
| 1  | -3.750559000 | 0.130774000  | 4.349454000  |
| 6  | -4.281706000 | -0.795349000 | 2.478212000  |
| 1  | -5.325420000 | -0.942574000 | 2.744911000  |
| 6  | -3.822520000 | -1.193190000 | 1.229411000  |
| 1  | -4.530528000 | -1.634521000 | 0.533918000  |
| 6  | -2.483818000 | -1.011844000 | 0.861152000  |
| 23 | 0.135183000  | 0.093781000  | -1.438806000 |
| 6  | 3.964535000  | 0.234637000  | -0.291189000 |
| 1  | 4.722057000  | -0.523166000 | -0.041450000 |
| 6  | -2.327746000 | 2.975629000  | -0.319841000 |
| 1  | -2.183637000 | 4.048625000  | -0.137415000 |
| 6  | -1.598602000 | -3.331064000 | -0.761273000 |
| 1  | -2.143406000 | -3.703901000 | -1.637021000 |
| 6  | -2.161160000 | -3.997352000 | 0.485680000  |
| 1  | -2.021977000 | -5.081607000 | 0.423307000  |
| 1  | -1.645310000 | -3.652457000 | 1.388040000  |
| 1  | -3.227290000 | -3.811835000 | 0.633260000  |
| 6  | -0.133512000 | -3.681965000 | -0.946113000 |
| 1  | 0.474794000  | -3.325169000 | -0.109510000 |
| 1  | -0.000459000 | -4.767571000 | -1.002149000 |
| 1  | 0.270088000  | -3.258704000 | -1.870006000 |
| 6  | 4.371926000  | 0.916436000  | -1.592472000 |
| 1  | 4.468428000  | 0.224323000  | -2.431429000 |
| 1  | 3.657094000  | 1.681391000  | -1.898565000 |
| 1  | 5.341214000  | 1.409618000  | -1.468764000 |
| 6  | 3.879011000  | 1.213425000  | 0.870226000  |
| 1  | 3.663766000  | 0.709233000  | 1.816053000  |
| 1  | 4.830291000  | 1.742821000  | 0.985873000  |
| 1  | 3.101477000  | 1.968622000  | 0.720712000  |
| 6  | -3.007863000 | 2.787226000  | -1.670162000 |
| 1  | -3.973393000 | 3.301911000  | -1.694274000 |
| 1  | -2.416852000 | 3.167348000  | -2.510349000 |
| 1  | -3.202935000 | 1.726499000  | -1.862366000 |
| 6  | -3.172097000 | 2.430731000  | 0.816711000  |

|    |              |              |              |
|----|--------------|--------------|--------------|
| 1  | -3.436202000 | 1.381780000  | 0.668817000  |
| 1  | -2.672980000 | 2.515574000  | 1.785158000  |
| 1  | -4.108857000 | 2.994248000  | 0.878697000  |
| 5  | -0.031783000 | -0.190774000 | 1.528816000  |
| 15 | 2.393396000  | -0.747057000 | -0.485220000 |
| 15 | -0.587253000 | 2.312271000  | -0.414500000 |
| 15 | -1.875248000 | -1.463259000 | -0.805525000 |
| 6  | 0.241113000  | 3.621290000  | -1.491335000 |
| 1  | 0.068517000  | 3.235830000  | -2.505198000 |
| 6  | 1.743490000  | 3.618624000  | -1.253681000 |
| 1  | 2.263546000  | 4.140765000  | -2.062600000 |
| 1  | 2.007845000  | 4.115414000  | -0.315558000 |
| 1  | 2.141068000  | 2.604071000  | -1.208655000 |
| 6  | -0.318221000 | 5.038615000  | -1.450915000 |
| 1  | 0.272320000  | 5.672679000  | -2.120464000 |
| 1  | -1.354763000 | 5.107048000  | -1.787530000 |
| 1  | -0.259152000 | 5.496196000  | -0.459577000 |
| 6  | 2.896465000  | -2.140906000 | -1.661590000 |
| 1  | 2.369468000  | -3.006646000 | -1.245085000 |
| 6  | 4.376905000  | -2.501010000 | -1.724484000 |
| 1  | 4.501687000  | -3.398368000 | -2.339355000 |
| 1  | 4.986439000  | -1.720180000 | -2.183943000 |
| 1  | 4.813751000  | -2.727008000 | -0.750486000 |
| 6  | 2.350593000  | -1.881221000 | -3.061084000 |
| 1  | 2.586191000  | -2.715226000 | -3.730379000 |
| 1  | 1.257225000  | -1.774427000 | -3.075376000 |
| 1  | 2.763231000  | -0.972758000 | -3.511013000 |
| 6  | -3.409721000 | -1.288983000 | -1.886596000 |
| 1  | -3.953558000 | -0.457629000 | -1.414798000 |
| 6  | -3.040857000 | -0.877064000 | -3.306414000 |
| 1  | -2.347152000 | -1.590476000 | -3.768673000 |
| 1  | -3.933649000 | -0.845526000 | -3.939209000 |
| 1  | -2.573566000 | 0.107657000  | -3.341250000 |
| 6  | -4.331849000 | -2.506039000 | -1.936322000 |
| 1  | -3.939169000 | -3.279912000 | -2.602437000 |
| 1  | -4.513805000 | -2.977703000 | -0.968979000 |
| 1  | -5.304681000 | -2.213624000 | -2.343680000 |
| 7  | 1.033515000  | 0.964058000  | -3.055849000 |
| 7  | -0.115525000 | 0.635704000  | -3.353506000 |
| 1  | -0.456081000 | 0.811235000  | -4.318854000 |

[3d''<sub>sc</sub> -N<sub>α</sub>-H]<sup>+</sup> (TE = -3334.914743)

|   |              |             |             |
|---|--------------|-------------|-------------|
| 6 | -0.416765000 | 1.801982000 | 0.692745000 |
| 6 | 0.138067000  | 2.816446000 | 1.485527000 |
| 1 | 1.031721000  | 2.608957000 | 2.068628000 |
| 6 | -0.444259000 | 4.077691000 | 1.573209000 |

|    |              |              |              |
|----|--------------|--------------|--------------|
| 1  | 0.013194000  | 4.834221000  | 2.206468000  |
| 6  | -1.608297000 | 4.371490000  | 0.871753000  |
| 1  | -2.068648000 | 5.352874000  | 0.946224000  |
| 6  | -2.150895000 | 3.409272000  | 0.028016000  |
| 1  | -3.017552000 | 3.643699000  | -0.586441000 |
| 6  | -1.552861000 | 2.155526000  | -0.065342000 |
| 6  | -0.891320000 | -0.501661000 | 1.433644000  |
| 6  | -1.559910000 | -0.023554000 | 2.572335000  |
| 1  | -1.430638000 | 1.019330000  | 2.856736000  |
| 6  | -2.375141000 | -0.836832000 | 3.348116000  |
| 1  | -2.865820000 | -0.424884000 | 4.226823000  |
| 6  | -2.571367000 | -2.170536000 | 3.001607000  |
| 1  | -3.214457000 | -2.810835000 | 3.599366000  |
| 6  | -1.963616000 | -2.668353000 | 1.857693000  |
| 1  | -2.146483000 | -3.692082000 | 1.538592000  |
| 6  | -1.136333000 | -1.842836000 | 1.093528000  |
| 6  | 1.468187000  | 0.263712000  | 1.284828000  |
| 6  | 1.652223000  | 0.218479000  | 2.675378000  |
| 1  | 0.779371000  | 0.206865000  | 3.322877000  |
| 6  | 2.913817000  | 0.192415000  | 3.255710000  |
| 1  | 3.004962000  | 0.156533000  | 4.338740000  |
| 6  | 4.055865000  | 0.207827000  | 2.460747000  |
| 1  | 5.045701000  | 0.181145000  | 2.908203000  |
| 6  | 3.914402000  | 0.217611000  | 1.081576000  |
| 1  | 4.789159000  | 0.168321000  | 0.437582000  |
| 6  | 2.638802000  | 0.245616000  | 0.512319000  |
| 16 | 2.521462000  | -0.037006000 | -1.246031000 |
| 16 | -2.016540000 | 1.042410000  | -1.374740000 |
| 16 | -0.520517000 | -2.472252000 | -0.456029000 |
| 23 | 0.071178000  | -0.333567000 | -1.489790000 |
| 6  | -3.772371000 | 0.440584000  | -1.097435000 |
| 1  | -4.369963000 | 1.276354000  | -1.479636000 |
| 6  | 0.854970000  | -3.668184000 | -0.016303000 |
| 1  | 0.296947000  | -4.544275000 | 0.335106000  |
| 6  | 2.658750000  | 1.638139000  | -2.097871000 |
| 1  | 3.119286000  | 1.348747000  | -3.049310000 |
| 6  | 3.573443000  | 2.566419000  | -1.335695000 |
| 1  | 3.698887000  | 3.496532000  | -1.898391000 |
| 1  | 3.156270000  | 2.827658000  | -0.358366000 |
| 1  | 4.566115000  | 2.138932000  | -1.179076000 |
| 6  | 1.288116000  | 2.235442000  | -2.345916000 |
| 1  | 0.794289000  | 2.528070000  | -1.415642000 |
| 1  | 1.367343000  | 3.138125000  | -2.960784000 |
| 1  | 0.626032000  | 1.567484000  | -2.919757000 |
| 6  | -3.953389000 | -0.772775000 | -1.984918000 |
| 1  | -3.708422000 | -0.572937000 | -3.030203000 |

|   |              |              |              |
|---|--------------|--------------|--------------|
| 1 | -3.331858000 | -1.608279000 | -1.646560000 |
| 1 | -4.997015000 | -1.097937000 | -1.942862000 |
| 6 | -4.099622000 | 0.183739000  | 0.351813000  |
| 1 | -3.846690000 | 1.028445000  | 0.997581000  |
| 1 | -5.177468000 | 0.012102000  | 0.443391000  |
| 1 | -3.590484000 | -0.704625000 | 0.731340000  |
| 6 | 1.566691000  | -3.995996000 | -1.312860000 |
| 1 | 2.302024000  | -4.787006000 | -1.140943000 |
| 1 | 0.882113000  | -4.347035000 | -2.089889000 |
| 1 | 2.108434000  | -3.124961000 | -1.697470000 |
| 6 | 1.777088000  | -3.168989000 | 1.068029000  |
| 1 | 2.408224000  | -2.348646000 | 0.719187000  |
| 1 | 1.238543000  | -2.830812000 | 1.957070000  |
| 1 | 2.440496000  | -3.983598000 | 1.376803000  |
| 6 | 0.086211000  | 0.373980000  | 0.654898000  |
| 7 | -0.792459000 | -0.954525000 | -3.273358000 |
| 7 | 0.410205000  | -1.129348000 | -3.329391000 |
| 1 | 0.841681000  | -1.527700000 | -4.184960000 |

$[3e''_{\text{ssi}} - N_{\alpha} - \mathbf{H}]^+$  (TE = -3586.324718)

|   |              |              |              |
|---|--------------|--------------|--------------|
| 6 | -0.874803000 | 0.120286000  | 2.100973000  |
| 6 | -1.649675000 | 0.822554000  | 3.033290000  |
| 1 | -2.045862000 | 1.804087000  | 2.773235000  |
| 6 | -1.939142000 | 0.288031000  | 4.284375000  |
| 1 | -2.542068000 | 0.853643000  | 4.990682000  |
| 6 | -1.469376000 | -0.976306000 | 4.629319000  |
| 1 | -1.702758000 | -1.401556000 | 5.602106000  |
| 6 | -0.722659000 | -1.712519000 | 3.716710000  |
| 1 | -0.384536000 | -2.716252000 | 3.964942000  |
| 6 | -0.433189000 | -1.155437000 | 2.472220000  |
| 6 | 0.917181000  | 2.074418000  | 0.477464000  |
| 6 | 0.929253000  | 3.164157000  | 1.355445000  |
| 1 | 0.166652000  | 3.235674000  | 2.131101000  |
| 6 | 1.906523000  | 4.150914000  | 1.274311000  |
| 1 | 1.903515000  | 4.982178000  | 1.974884000  |
| 6 | 2.884968000  | 4.073703000  | 0.288501000  |
| 1 | 3.642091000  | 4.849365000  | 0.205680000  |
| 6 | 2.906786000  | 3.001860000  | -0.597654000 |
| 1 | 3.675009000  | 2.956636000  | -1.364781000 |
| 6 | 1.941412000  | 2.004844000  | -0.475819000 |
| 6 | -1.953606000 | 1.562997000  | -0.386686000 |
| 6 | -2.454995000 | 2.826218000  | -0.047951000 |
| 1 | -1.956236000 | 3.416311000  | 0.720716000  |
| 6 | -3.570270000 | 3.357496000  | -0.686649000 |
| 1 | -3.942507000 | 4.339427000  | -0.404460000 |
| 6 | -4.196155000 | 2.644983000  | -1.705532000 |

|    |              |              |              |
|----|--------------|--------------|--------------|
| 1  | -5.052205000 | 3.068342000  | -2.224696000 |
| 6  | -3.707907000 | 1.400257000  | -2.085953000 |
| 1  | -4.161821000 | 0.862435000  | -2.914172000 |
| 6  | -2.608462000 | 0.867954000  | -1.411578000 |
| 16 | -1.946963000 | -0.716456000 | -1.945550000 |
| 16 | 0.480407000  | -2.163706000 | 1.293191000  |
| 16 | 1.927406000  | 0.579871000  | -1.577757000 |
| 23 | 0.325024000  | -1.219323000 | -1.034493000 |
| 6  | 2.219712000  | -2.040767000 | 1.964277000  |
| 1  | 2.143769000  | -2.540685000 | 2.937599000  |
| 6  | 3.716506000  | 0.333067000  | -2.056334000 |
| 1  | 3.947672000  | 1.231620000  | -2.639844000 |
| 6  | -3.153050000 | -1.982186000 | -1.271729000 |
| 1  | -2.631262000 | -2.905797000 | -1.546698000 |
| 6  | -4.480681000 | -1.894602000 | -1.993704000 |
| 1  | -5.103002000 | -2.747294000 | -1.704762000 |
| 1  | -5.031596000 | -0.991290000 | -1.717285000 |
| 1  | -4.371258000 | -1.916176000 | -3.080156000 |
| 6  | -3.290208000 | -1.871139000 | 0.229821000  |
| 1  | -3.652973000 | -0.882820000 | 0.532287000  |
| 1  | -4.016839000 | -2.606548000 | 0.589217000  |
| 1  | -2.348251000 | -2.058969000 | 0.749184000  |
| 6  | 3.109682000  | -2.844529000 | 1.040077000  |
| 1  | 2.777382000  | -3.881059000 | 0.938481000  |
| 1  | 3.140820000  | -2.399990000 | 0.039222000  |
| 1  | 4.133344000  | -2.858207000 | 1.425251000  |
| 6  | 2.656899000  | -0.605556000 | 2.138595000  |
| 1  | 2.009326000  | -0.053119000 | 2.824200000  |
| 1  | 3.673431000  | -0.572341000 | 2.544953000  |
| 1  | 2.665053000  | -0.074459000 | 1.182955000  |
| 6  | 4.650255000  | 0.212225000  | -0.872127000 |
| 1  | 5.685279000  | 0.201724000  | -1.229318000 |
| 1  | 4.558628000  | 1.038806000  | -0.164767000 |
| 1  | 4.484765000  | -0.719654000 | -0.326405000 |
| 6  | 3.772091000  | -0.877450000 | -2.964512000 |
| 1  | 3.577182000  | -1.796924000 | -2.404848000 |
| 1  | 3.062042000  | -0.818605000 | -3.793539000 |
| 1  | 4.774104000  | -0.966494000 | -3.392812000 |
| 14 | -0.425792000 | 0.748038000  | 0.374748000  |
| 7  | -0.058161000 | -3.070816000 | -1.777187000 |
| 7  | 1.149471000  | -2.876072000 | -1.851592000 |
| 1  | 1.753337000  | -3.600084000 | -2.282880000 |

[3f'<sub>SB</sub> - N<sub>α</sub>-H]<sup>+</sup> (TE = -3321.675483)

|   |              |              |              |
|---|--------------|--------------|--------------|
| 6 | -1.108153000 | -1.369379000 | -1.321349000 |
| 6 | -1.037507000 | -2.064419000 | -2.540365000 |



|    |              |              |              |
|----|--------------|--------------|--------------|
| 1  | -0.284226000 | -1.774087000 | -3.272942000 |
| 6  | -1.912905000 | -3.101588000 | -2.841294000 |
| 1  | -1.838996000 | -3.612132000 | -3.798363000 |
| 6  | -2.871549000 | -3.496588000 | -1.912766000 |
| 1  | -3.549094000 | -4.316606000 | -2.135915000 |
| 6  | -2.931902000 | -2.866566000 | -0.675734000 |
| 1  | -3.633219000 | -3.210082000 | 0.081646000  |
| 6  | -2.065737000 | -1.809597000 | -0.398782000 |
| 6  | -0.946900000 | 1.309337000  | -1.389833000 |
| 6  | -1.802203000 | 1.443949000  | -2.496566000 |
| 1  | -2.047391000 | 0.560960000  | -3.086677000 |
| 6  | -2.327370000 | 2.675934000  | -2.869348000 |
| 1  | -2.975157000 | 2.747936000  | -3.739571000 |
| 6  | -2.037644000 | 3.812956000  | -2.120854000 |
| 1  | -2.459499000 | 4.775919000  | -2.396991000 |
| 6  | -1.236511000 | 3.708081000  | -0.989739000 |
| 1  | -1.052740000 | 4.579773000  | -0.365339000 |
| 6  | -0.694041000 | 2.471175000  | -0.645692000 |
| 6  | 1.307515000  | -0.143130000 | -1.506951000 |
| 6  | 1.673928000  | 0.325295000  | -2.781224000 |
| 1  | 0.911184000  | 0.776458000  | -3.416054000 |
| 6  | 2.977129000  | 0.235508000  | -3.255357000 |
| 1  | 3.217610000  | 0.602121000  | -4.250351000 |
| 6  | 3.976111000  | -0.290692000 | -2.443757000 |
| 1  | 5.004805000  | -0.335589000 | -2.791557000 |
| 6  | 3.659207000  | -0.724922000 | -1.162864000 |
| 1  | 4.441309000  | -1.078918000 | -0.496188000 |
| 6  | 2.336199000  | -0.677356000 | -0.716171000 |
| 16 | 2.046246000  | -1.106006000 | 0.999680000  |
| 16 | -2.018310000 | -1.172069000 | 1.271673000  |
| 16 | 0.174048000  | 2.309649000  | 0.905716000  |
| 23 | 0.085719000  | 0.069766000  | 1.916405000  |
| 6  | -3.595070000 | -0.190736000 | 1.492194000  |
| 1  | -4.370508000 | -0.963786000 | 1.545412000  |
| 6  | 1.746364000  | 3.311468000  | 0.727541000  |
| 1  | 1.381917000  | 4.345491000  | 0.733150000  |
| 6  | 2.019631000  | -2.977128000 | 1.079414000  |
| 1  | 1.868546000  | -3.113817000 | 2.158226000  |
| 6  | 3.370521000  | -3.527541000 | 0.673913000  |
| 1  | 3.396584000  | -4.604017000 | 0.868556000  |
| 1  | 3.552076000  | -3.391954000 | -0.396281000 |
| 1  | 4.194571000  | -3.068959000 | 1.225106000  |
| 6  | 0.877524000  | -3.587808000 | 0.303748000  |
| 1  | 0.936275000  | -3.340298000 | -0.760754000 |
| 1  | 0.918506000  | -4.678844000 | 0.387011000  |
| 1  | -0.096418000 | -3.264993000 | 0.675712000  |

|   |              |              |              |
|---|--------------|--------------|--------------|
| 6 | -3.478811000 | 0.515804000  | 2.827912000  |
| 1 | -3.243186000 | -0.166040000 | 3.649442000  |
| 1 | -2.713901000 | 1.302563000  | 2.796804000  |
| 1 | -4.424441000 | 1.008382000  | 3.070380000  |
| 6 | -3.867334000 | 0.754094000  | 0.347048000  |
| 1 | -3.865261000 | 0.249295000  | -0.622276000 |
| 1 | -4.854757000 | 1.208911000  | 0.479281000  |
| 1 | -3.131953000 | 1.562789000  | 0.310326000  |
| 6 | 2.577070000  | 3.045539000  | 1.964711000  |
| 1 | 3.459997000  | 3.691109000  | 1.953207000  |
| 1 | 2.032056000  | 3.242650000  | 2.890530000  |
| 1 | 2.926445000  | 2.008714000  | 1.996449000  |
| 6 | 2.473232000  | 3.015498000  | -0.562292000 |
| 1 | 2.887737000  | 2.004283000  | -0.568157000 |
| 1 | 1.833248000  | 3.128009000  | -1.441250000 |
| 1 | 3.307165000  | 3.716683000  | -0.671610000 |
| 5 | -0.230140000 | -0.074981000 | -1.176846000 |
| 7 | 1.011421000  | 0.480605000  | 3.678316000  |
| 7 | 0.255289000  | -0.478346000 | 3.839633000  |
| 1 | 0.178026000  | -0.901917000 | 4.783909000  |

Cartesian coordinates of the transition states (TS2) involved during the conversion of **[3-V-H]<sup>+</sup>** **[3-N<sub>α</sub>-H]<sup>+</sup>** to **[3]** along with their total energies (in hartree) including zero point vibrational correction at M06-L-D3(heptane)/6-311+G\* level of theory.

**a'pc -TS2 (TE = -3062.077849)**

|    |              |              |              |
|----|--------------|--------------|--------------|
| 6  | -0.394995000 | 2.195523000  | 1.752465000  |
| 6  | 0.184851000  | 1.013551000  | 2.542335000  |
| 6  | -2.513303000 | -0.520804000 | 1.981488000  |
| 6  | -1.185940000 | -1.115651000 | 2.427473000  |
| 6  | 2.596710000  | -0.969699000 | 1.820028000  |
| 6  | 1.257535000  | -1.236958000 | 2.490010000  |
| 1  | -2.619437000 | 0.514192000  | 2.325686000  |
| 1  | -1.174707000 | -1.152536000 | 3.532559000  |
| 1  | 3.381838000  | -1.645027000 | 2.177001000  |
| 1  | 1.354077000  | -1.080245000 | 3.578943000  |
| 1  | -0.213231000 | 3.144922000  | 2.269860000  |
| 1  | 1.245026000  | 1.243532000  | 2.720882000  |
| 6  | -0.332015000 | 3.468070000  | -0.994912000 |
| 1  | 0.281850000  | 3.389622000  | -1.904067000 |
| 6  | -3.076311000 | -2.295428000 | -0.235648000 |
| 1  | -2.315590000 | -2.851433000 | 0.336067000  |
| 6  | 3.894919000  | -0.573457000 | -0.792503000 |
| 1  | 4.027507000  | 0.456208000  | -0.428624000 |
| 23 | -0.061207000 | -0.261085000 | -0.377007000 |
| 6  | 0.088252000  | -0.409742000 | 1.934903000  |

|   |              |              |              |
|---|--------------|--------------|--------------|
| 1 | -1.481284000 | 2.116717000  | 1.622596000  |
| 1 | -0.264935000 | 1.009260000  | 3.550556000  |
| 1 | 1.025519000  | -2.305781000 | 2.386219000  |
| 1 | 2.954122000  | 0.048247000  | 2.023434000  |
| 1 | -1.153931000 | -2.172992000 | 2.121975000  |
| 1 | -3.360962000 | -1.067037000 | 2.410767000  |
| 6 | 5.111715000  | -1.386492000 | -0.366581000 |
| 1 | 6.025266000  | -0.926261000 | -0.756369000 |
| 1 | 5.223446000  | -1.457154000 | 0.718735000  |
| 1 | 5.076411000  | -2.403160000 | -0.769645000 |
| 6 | 3.767461000  | -0.530373000 | -2.309601000 |
| 1 | 3.586736000  | -1.525660000 | -2.731087000 |
| 1 | 2.954037000  | 0.116826000  | -2.644152000 |
| 1 | 4.695033000  | -0.161990000 | -2.758777000 |
| 6 | -4.448159000 | -2.728188000 | 0.265304000  |
| 1 | -4.539310000 | -3.817620000 | 0.209402000  |
| 1 | -4.645904000 | -2.441262000 | 1.301257000  |
| 1 | -5.248084000 | -2.315196000 | -0.355952000 |
| 6 | -2.898919000 | -2.656176000 | -1.707403000 |
| 1 | -3.657842000 | -2.182761000 | -2.336355000 |
| 1 | -1.920550000 | -2.373031000 | -2.105788000 |
| 1 | -3.005691000 | -3.737083000 | -1.844348000 |
| 6 | -1.768315000 | 3.147115000  | -1.381590000 |
| 1 | -1.876831000 | 2.126550000  | -1.763533000 |
| 1 | -2.446287000 | 3.268175000  | -0.530084000 |
| 1 | -2.118838000 | 3.830242000  | -2.161230000 |
| 6 | -0.215396000 | 4.882033000  | -0.439851000 |
| 1 | 0.819253000  | 5.215018000  | -0.342487000 |
| 1 | -0.716065000 | 5.591436000  | -1.106834000 |
| 1 | -0.690520000 | 4.978497000  | 0.542081000  |
| 6 | 2.173279000  | -2.951848000 | -0.319916000 |
| 1 | 2.617579000  | -3.074266000 | -1.319069000 |
| 6 | 0.699156000  | -3.343261000 | -0.414231000 |
| 1 | 0.165581000  | -3.139318000 | 0.523029000  |
| 1 | 0.188466000  | -2.827919000 | -1.237085000 |
| 1 | 0.581668000  | -4.414283000 | -0.611058000 |
| 6 | 2.913216000  | -3.850106000 | 0.662740000  |
| 1 | 2.864469000  | -4.891737000 | 0.329072000  |
| 1 | 3.968400000  | -3.594618000 | 0.773522000  |
| 1 | 2.460912000  | -3.817208000 | 1.658819000  |
| 6 | -3.996688000 | 0.617681000  | -0.270997000 |
| 1 | -3.534848000 | 1.597500000  | -0.091414000 |
| 6 | -5.224443000 | 0.531671000  | 0.629342000  |
| 1 | -5.798314000 | -0.383080000 | 0.472949000  |
| 1 | -4.977321000 | 0.592047000  | 1.692155000  |
| 1 | -5.896131000 | 1.368370000  | 0.410844000  |

|    |              |              |              |
|----|--------------|--------------|--------------|
| 6  | -4.366623000 | 0.535029000  | -1.746891000 |
| 1  | -4.947794000 | -0.366841000 | -1.962258000 |
| 1  | -4.986393000 | 1.388482000  | -2.038475000 |
| 1  | -3.491351000 | 0.525388000  | -2.405444000 |
| 6  | 2.154278000  | 2.574939000  | 0.359492000  |
| 1  | 2.585161000  | 1.627327000  | 0.707010000  |
| 6  | 2.438366000  | 3.613383000  | 1.437871000  |
| 1  | 3.519613000  | 3.751997000  | 1.541281000  |
| 1  | 2.012703000  | 4.592771000  | 1.210846000  |
| 1  | 2.061952000  | 3.312283000  | 2.418920000  |
| 6  | 2.812989000  | 2.918078000  | -0.972098000 |
| 1  | 3.901911000  | 2.956112000  | -0.866151000 |
| 1  | 2.581655000  | 2.183955000  | -1.751199000 |
| 1  | 2.498109000  | 3.899005000  | -1.341599000 |
| 15 | -2.597878000 | -0.530250000 | 0.146694000  |
| 15 | 0.363421000  | 2.132362000  | 0.088899000  |
| 15 | 2.310834000  | -1.114104000 | 0.014675000  |
| 7  | 0.548429000  | -0.149970000 | -2.297327000 |
| 7  | 0.123319000  | -1.099565000 | -2.938069000 |
| 1  | -0.045997000 | -0.860940000 | -3.945845000 |

**b'**<sub>psi</sub> -TS2 (TE = -3313.909631)

|    |              |              |              |
|----|--------------|--------------|--------------|
| 15 | -2.386810000 | -1.114532000 | 0.017528000  |
| 15 | -0.181020000 | 2.089638000  | 0.020392000  |
| 15 | 2.523683000  | -0.626502000 | 0.113428000  |
| 6  | -1.976906000 | -2.588139000 | 1.055815000  |
| 6  | -1.365920000 | -2.101502000 | 2.376582000  |
| 6  | 2.795682000  | -0.604939000 | 1.944894000  |
| 6  | 1.683463000  | -1.353335000 | 2.677943000  |
| 6  | -0.984947000 | 2.005839000  | 1.682385000  |
| 6  | -0.375852000 | 0.964090000  | 2.643177000  |
| 1  | 3.795199000  | -0.988562000 | 2.180350000  |
| 1  | 1.786740000  | -2.435327000 | 2.519281000  |
| 1  | -1.006105000 | 3.006043000  | 2.136471000  |
| 1  | 0.578686000  | 1.346427000  | 3.027218000  |
| 1  | -2.852775000 | -3.233454000 | 1.191981000  |
| 1  | -0.945731000 | -2.951544000 | 2.926770000  |
| 6  | -3.404020000 | -1.717763000 | -1.433966000 |
| 1  | -4.449496000 | -1.669709000 | -1.098532000 |
| 6  | -3.685903000 | -0.288433000 | 1.091168000  |
| 1  | -3.126076000 | 0.140053000  | 1.933468000  |
| 6  | 3.785621000  | 0.592498000  | -0.515572000 |
| 1  | 3.542423000  | 1.477532000  | 0.090886000  |
| 6  | 3.015663000  | -2.360225000 | -0.394250000 |
| 1  | 2.071564000  | -2.918555000 | -0.298456000 |
| 6  | 1.155022000  | 3.384404000  | 0.143952000  |

|    |              |              |              |
|----|--------------|--------------|--------------|
| 1  | 1.826054000  | 3.171894000  | -0.700705000 |
| 6  | -1.476761000 | 2.674230000  | -1.177932000 |
| 1  | -2.109515000 | 1.775429000  | -1.227229000 |
| 23 | 0.089082000  | -0.343319000 | -0.500307000 |
| 14 | -0.003297000 | -0.818551000 | 1.979998000  |
| 1  | 1.776092000  | -1.204479000 | 3.761446000  |
| 1  | 2.807579000  | 0.448673000  | 2.248264000  |
| 1  | -1.020589000 | 0.898844000  | 3.531279000  |
| 1  | -2.032285000 | 1.766373000  | 1.469632000  |
| 1  | -2.142073000 | -1.683526000 | 3.029325000  |
| 1  | -1.243745000 | -3.176935000 | 0.488967000  |
| 7  | 0.208086000  | -2.373054000 | -2.101090000 |
| 7  | 0.250257000  | -1.135962000 | -2.182619000 |
| 1  | 0.258027000  | -2.846292000 | -3.027898000 |
| 6  | -4.408379000 | 0.833961000  | 0.356939000  |
| 1  | -5.018028000 | 0.449966000  | -0.467363000 |
| 1  | -5.092055000 | 1.353610000  | 1.035211000  |
| 1  | -3.734200000 | 1.585760000  | -0.058060000 |
| 6  | -4.693649000 | -1.281569000 | 1.660727000  |
| 1  | -5.462796000 | -0.744654000 | 2.224775000  |
| 1  | -5.213788000 | -1.843014000 | 0.877608000  |
| 1  | -4.243714000 | -2.004683000 | 2.343527000  |
| 6  | -3.240946000 | -0.773018000 | -2.620369000 |
| 1  | -3.897376000 | -1.071449000 | -3.444057000 |
| 1  | -3.491471000 | 0.263194000  | -2.368387000 |
| 1  | -2.213999000 | -0.776117000 | -3.000355000 |
| 6  | -3.098521000 | -3.161059000 | -1.811313000 |
| 1  | -2.044961000 | -3.305124000 | -2.065564000 |
| 1  | -3.340700000 | -3.863146000 | -1.009735000 |
| 1  | -3.687772000 | -3.452547000 | -2.686526000 |
| 6  | -0.865886000 | 2.848376000  | -2.565198000 |
| 1  | -1.648917000 | 3.039596000  | -3.305222000 |
| 1  | -0.170866000 | 3.692397000  | -2.612520000 |
| 1  | -0.323030000 | 1.954258000  | -2.893140000 |
| 6  | -2.367122000 | 3.838860000  | -0.760705000 |
| 1  | -1.872899000 | 4.805734000  | -0.861322000 |
| 1  | -3.255978000 | 3.869817000  | -1.400070000 |
| 1  | -2.719362000 | 3.755883000  | 0.272120000  |
| 6  | 1.932523000  | 3.213686000  | 1.443835000  |
| 1  | 2.245917000  | 2.184225000  | 1.624239000  |
| 1  | 2.833873000  | 3.833775000  | 1.433459000  |
| 1  | 1.338068000  | 3.527873000  | 2.307648000  |
| 6  | 0.665445000  | 4.822708000  | 0.027399000  |
| 1  | 1.502450000  | 5.509553000  | 0.189080000  |
| 1  | 0.247162000  | 5.055741000  | -0.952487000 |
| 1  | -0.090464000 | 5.060636000  | 0.783001000  |

|   |             |              |              |
|---|-------------|--------------|--------------|
| 6 | 5.240207000 | 0.234763000  | -0.235749000 |
| 1 | 5.575317000 | -0.618830000 | -0.830974000 |
| 1 | 5.892921000 | 1.074782000  | -0.495593000 |
| 1 | 5.423495000 | -0.000786000 | 0.816181000  |
| 6 | 3.554087000 | 0.970522000  | -1.975408000 |
| 1 | 4.128357000 | 1.866707000  | -2.231822000 |
| 1 | 3.873074000 | 0.183195000  | -2.662164000 |
| 1 | 2.499695000 | 1.179751000  | -2.189758000 |
| 6 | 4.054418000 | -3.028476000 | 0.498237000  |
| 1 | 4.263540000 | -4.037214000 | 0.127176000  |
| 1 | 5.005958000 | -2.489233000 | 0.505409000  |
| 1 | 3.724424000 | -3.133831000 | 1.534272000  |
| 6 | 3.435953000 | -2.422056000 | -1.860350000 |
| 1 | 4.444554000 | -2.024978000 | -2.006243000 |
| 1 | 3.453770000 | -3.462328000 | -2.200552000 |
| 1 | 2.767253000 | -1.871861000 | -2.524932000 |

$c'_{PB}$  -TS2 (TE = -3049.270191)

|    |              |              |              |
|----|--------------|--------------|--------------|
| 6  | -0.592282000 | 2.202654000  | 1.971227000  |
| 6  | 0.254376000  | 1.257772000  | 2.826521000  |
| 6  | -2.343104000 | -0.784717000 | 2.054271000  |
| 6  | -1.031246000 | -1.217955000 | 2.702073000  |
| 6  | 2.755237000  | -0.548400000 | 1.819106000  |
| 6  | 1.660639000  | -1.039812000 | 2.769645000  |
| 1  | -2.599332000 | 0.247008000  | 2.314026000  |
| 1  | -1.199753000 | -1.315477000 | 3.791633000  |
| 1  | 3.720949000  | -1.010189000 | 2.051586000  |
| 1  | 2.012785000  | -0.857836000 | 3.799407000  |
| 1  | -0.543521000 | 3.228108000  | 2.355368000  |
| 1  | 1.282747000  | 1.644603000  | 2.855710000  |
| 6  | -1.123990000 | 3.449224000  | -0.678724000 |
| 1  | -0.475771000 | 4.329913000  | -0.783907000 |
| 6  | -2.588607000 | -2.718700000 | -0.087830000 |
| 1  | -1.810128000 | -3.179820000 | 0.541661000  |
| 6  | 3.788538000  | -0.041214000 | -0.842806000 |
| 1  | 3.708901000  | 1.010777000  | -0.528402000 |
| 23 | 0.001458000  | -0.151279000 | -0.729904000 |
| 1  | -1.652314000 | 1.933916000  | 1.990641000  |
| 1  | -0.089081000 | 1.366583000  | 3.871731000  |
| 1  | 1.568131000  | -2.131087000 | 2.696869000  |
| 1  | 2.910944000  | 0.532935000  | 1.927175000  |
| 1  | -0.792797000 | -2.247419000 | 2.398745000  |
| 1  | -3.186311000 | -1.389512000 | 2.408472000  |
| 6  | 5.167452000  | -0.552092000 | -0.444314000 |
| 1  | 5.941307000  | 0.075933000  | -0.897342000 |
| 1  | 5.341019000  | -0.544174000 | 0.634827000  |

|   |              |              |              |
|---|--------------|--------------|--------------|
| 1 | 5.339041000  | -1.569425000 | -0.808388000 |
| 6 | 3.611351000  | -0.100817000 | -2.354678000 |
| 1 | 3.651664000  | -1.130205000 | -2.726828000 |
| 1 | 2.662269000  | 0.324163000  | -2.686931000 |
| 1 | 4.416851000  | 0.448068000  | -2.852351000 |
| 6 | -3.944312000 | -3.235486000 | 0.376441000  |
| 1 | -3.954652000 | -4.329931000 | 0.353552000  |
| 1 | -4.204822000 | -2.934726000 | 1.394432000  |
| 1 | -4.747273000 | -2.901576000 | -0.287251000 |
| 6 | -2.321815000 | -3.136887000 | -1.531153000 |
| 1 | -3.114377000 | -2.799950000 | -2.204235000 |
| 1 | -1.377491000 | -2.754995000 | -1.927987000 |
| 1 | -2.286745000 | -4.228405000 | -1.605713000 |
| 6 | -1.477801000 | 2.951910000  | -2.075461000 |
| 1 | -0.594536000 | 2.683206000  | -2.661369000 |
| 1 | -2.110408000 | 2.058118000  | -2.036347000 |
| 1 | -2.026750000 | 3.719175000  | -2.630481000 |
| 6 | -2.357720000 | 3.881160000  | 0.102048000  |
| 1 | -2.112229000 | 4.335852000  | 1.064837000  |
| 1 | -2.918819000 | 4.624084000  | -0.473055000 |
| 1 | -3.045973000 | 3.051298000  | 0.295218000  |
| 6 | 2.601841000  | -2.690397000 | -0.197448000 |
| 1 | 3.011422000  | -2.766674000 | -1.215582000 |
| 6 | 1.266003000  | -3.427474000 | -0.175609000 |
| 1 | 0.746828000  | -3.298696000 | 0.781712000  |
| 1 | 0.600071000  | -3.091167000 | -0.975695000 |
| 1 | 1.416387000  | -4.502928000 | -0.316699000 |
| 6 | 3.581605000  | -3.336103000 | 0.775946000  |
| 1 | 3.759861000  | -4.376483000 | 0.485652000  |
| 1 | 4.553571000  | -2.842208000 | 0.814951000  |
| 1 | 3.182913000  | -3.358839000 | 1.794847000  |
| 6 | -3.723956000 | 0.102828000  | -0.365018000 |
| 1 | -3.322224000 | 1.124480000  | -0.280989000 |
| 6 | -4.980839000 | 0.035373000  | 0.493497000  |
| 1 | -5.464378000 | -0.942618000 | 0.449989000  |
| 1 | -4.790486000 | 0.263383000  | 1.545205000  |
| 1 | -5.712293000 | 0.767325000  | 0.135285000  |
| 6 | -4.026975000 | -0.147657000 | -1.837515000 |
| 1 | -4.537688000 | -1.104111000 | -1.983873000 |
| 1 | -4.692175000 | 0.628421000  | -2.228554000 |
| 1 | -3.126226000 | -0.152765000 | -2.461569000 |
| 6 | 1.617037000  | 2.977942000  | 0.223409000  |
| 1 | 2.267524000  | 2.221538000  | 0.687273000  |
| 6 | 1.692072000  | 4.253270000  | 1.050516000  |
| 1 | 2.687645000  | 4.700929000  | 0.971018000  |
| 1 | 0.978522000  | 5.010421000  | 0.707123000  |

|    |              |              |              |
|----|--------------|--------------|--------------|
| 1  | 1.503121000  | 4.079082000  | 2.112884000  |
| 6  | 2.087355000  | 3.197456000  | -1.210991000 |
| 1  | 3.138740000  | 3.500728000  | -1.232305000 |
| 1  | 1.989336000  | 2.297575000  | -1.827328000 |
| 1  | 1.520690000  | 3.994040000  | -1.704211000 |
| 15 | -2.268478000 | -0.904308000 | 0.213017000  |
| 15 | -0.066656000 | 2.183069000  | 0.209800000  |
| 15 | 2.356659000  | -0.846526000 | 0.041319000  |
| 5  | 0.261925000  | -0.318015000 | 2.641029000  |
| 7  | 0.103724000  | -0.178953000 | -2.592042000 |
| 7  | 0.377060000  | -1.311598000 | -3.038081000 |
| 1  | 0.118654000  | -1.411861000 | -4.041877000 |

**d'**<sub>sc</sub> -TS2 (TE = -2877.649322)

|    |              |              |              |
|----|--------------|--------------|--------------|
| 6  | -0.016172000 | 1.574801000  | 2.050591000  |
| 6  | 0.269710000  | 0.182093000  | 2.614673000  |
| 6  | -2.541360000 | -0.650184000 | 1.885209000  |
| 6  | -1.405094000 | -1.642444000 | 2.020811000  |
| 6  | 2.406105000  | -1.735975000 | 1.364384000  |
| 6  | 1.039888000  | -2.116792000 | 1.908261000  |
| 1  | -2.498567000 | 0.126469000  | 2.654909000  |
| 1  | -1.432770000 | -2.056168000 | 3.045687000  |
| 1  | 3.150542000  | -2.518374000 | 1.530682000  |
| 1  | 1.158568000  | -2.372817000 | 2.975826000  |
| 1  | 0.329694000  | 2.356234000  | 2.733101000  |
| 1  | 1.327916000  | 0.170023000  | 2.903203000  |
| 6  | 0.331091000  | 3.279941000  | -0.360415000 |
| 1  | 1.185913000  | 3.488828000  | -1.015363000 |
| 6  | -3.806601000 | -0.572011000 | -0.723291000 |
| 1  | -4.717888000 | -0.287033000 | -0.182674000 |
| 6  | 3.565084000  | -0.190572000 | -0.776581000 |
| 1  | 3.444945000  | 0.573552000  | 0.000415000  |
| 23 | -0.068083000 | -0.430190000 | -0.333249000 |
| 16 | -2.466596000 | 0.237975000  | 0.278425000  |
| 16 | 0.928351000  | 1.730772000  | 0.483001000  |
| 16 | 2.247383000  | -1.445109000 | -0.436850000 |
| 6  | -0.032262000 | -1.041101000 | 1.714730000  |
| 1  | -1.074347000 | 1.757022000  | 1.842261000  |
| 1  | -0.274783000 | 0.100720000  | 3.569638000  |
| 1  | 0.713934000  | -3.050577000 | 1.428622000  |
| 1  | 2.787569000  | -0.810046000 | 1.809829000  |
| 1  | -1.589279000 | -2.499260000 | 1.356276000  |
| 1  | -3.530688000 | -1.109160000 | 1.961097000  |
| 6  | 4.934168000  | -0.831696000 | -0.677368000 |
| 1  | 5.710140000  | -0.082079000 | -0.861868000 |
| 1  | 5.123734000  | -1.258029000 | 0.310975000  |



|   |              |              |              |
|---|--------------|--------------|--------------|
| 1 | 5.059763000  | -1.626766000 | -1.417556000 |
| 6 | 3.286489000  | 0.409322000  | -2.141528000 |
| 1 | 3.335393000  | -0.344964000 | -2.932797000 |
| 1 | 2.300551000  | 0.884245000  | -2.201697000 |
| 1 | 4.035622000  | 1.171855000  | -2.373116000 |
| 6 | -3.798847000 | 0.093823000  | -2.085675000 |
| 1 | -4.624369000 | -0.292582000 | -2.689831000 |
| 1 | -3.919770000 | 1.177783000  | -2.016890000 |
| 1 | -2.872943000 | -0.109259000 | -2.631635000 |
| 6 | -3.693187000 | -2.078603000 | -0.785126000 |
| 1 | -2.772637000 | -2.398427000 | -1.279501000 |
| 1 | -3.726535000 | -2.543785000 | 0.203294000  |
| 1 | -4.536964000 | -2.482186000 | -1.354210000 |
| 6 | -0.908354000 | 3.058106000  | -1.200774000 |
| 1 | -0.784570000 | 2.238348000  | -1.917845000 |
| 1 | -1.785600000 | 2.846074000  | -0.584633000 |
| 1 | -1.124779000 | 3.962776000  | -1.778151000 |
| 6 | 0.182950000  | 4.402005000  | 0.646151000  |
| 1 | 1.086688000  | 4.553357000  | 1.240789000  |
| 1 | -0.026622000 | 5.337507000  | 0.119600000  |
| 1 | -0.652997000 | 4.225656000  | 1.329302000  |
| 7 | -0.545610000 | -1.581672000 | -1.754427000 |
| 7 | -0.419432000 | -1.092391000 | -2.872917000 |
| 1 | -0.711523000 | -1.738594000 | -3.639134000 |

$e'_{ssi}$  -TS2 (TE = -3129.056635)

|    |              |              |              |
|----|--------------|--------------|--------------|
| 6  | -0.911700000 | 0.005096000  | 2.394341000  |
| 6  | -0.247894000 | -1.361333000 | 2.405157000  |
| 6  | -2.530888000 | -2.344754000 | 0.165088000  |
| 6  | -1.298291000 | -3.233619000 | 0.250708000  |
| 6  | 2.880616000  | -1.621221000 | 0.801993000  |
| 6  | 1.921493000  | -2.807570000 | 0.845404000  |
| 1  | -2.806575000 | -1.935147000 | 1.144282000  |
| 1  | -1.481362000 | -4.006092000 | 1.007949000  |
| 1  | 3.929671000  | -1.927689000 | 0.770116000  |
| 1  | 2.067180000  | -3.351512000 | 1.786704000  |
| 1  | -1.001282000 | 0.441362000  | 3.393963000  |
| 1  | 0.682119000  | -1.299125000 | 2.985532000  |
| 6  | -0.983637000 | 2.629079000  | 1.224574000  |
| 6  | -3.594184000 | 0.252053000  | -0.595779000 |
| 6  | 3.751467000  | 0.701023000  | -0.783198000 |
| 23 | 0.116203000  | -0.058158000 | -0.822890000 |
| 16 | -2.205147000 | -0.918908000 | -0.966201000 |
| 16 | 0.112455000  | 1.141425000  | 1.386319000  |
| 16 | 2.530423000  | -0.699110000 | -0.749131000 |
| 1  | -1.911986000 | -0.017869000 | 1.946149000  |

|    |              |              |              |
|----|--------------|--------------|--------------|
| 1  | -0.888908000 | -2.055637000 | 2.965466000  |
| 1  | 2.162770000  | -3.507638000 | 0.038344000  |
| 1  | 2.748762000  | -0.949823000 | 1.659204000  |
| 1  | -1.144608000 | -3.758895000 | -0.698032000 |
| 1  | -3.404613000 | -2.862715000 | -0.239081000 |
| 14 | 0.166963000  | -2.106368000 | 0.677415000  |
| 1  | 3.686001000  | 1.000835000  | -1.836344000 |
| 1  | -1.942815000 | 2.238076000  | 0.860490000  |
| 1  | -3.476973000 | 0.534048000  | 0.460117000  |
| 6  | 5.152262000  | 0.200159000  | -0.490859000 |
| 1  | 5.876783000  | 0.990490000  | -0.708647000 |
| 1  | 5.278149000  | -0.063180000 | 0.563256000  |
| 1  | 5.419947000  | -0.669285000 | -1.095840000 |
| 6  | 3.335853000  | 1.861412000  | 0.096643000  |
| 1  | 3.267385000  | 1.576077000  | 1.150923000  |
| 1  | 4.073790000  | 2.667194000  | 0.023892000  |
| 1  | 2.369556000  | 2.273929000  | -0.207140000 |
| 6  | -3.391162000 | 1.463839000  | -1.485670000 |
| 1  | -4.139477000 | 2.227875000  | -1.256628000 |
| 1  | -2.403947000 | 1.921277000  | -1.355522000 |
| 1  | -3.500232000 | 1.203507000  | -2.542555000 |
| 6  | -4.939024000 | -0.412260000 | -0.805308000 |
| 1  | -5.739680000 | 0.309873000  | -0.617921000 |
| 1  | -5.051504000 | -0.771147000 | -1.832227000 |
| 1  | -5.101826000 | -1.255164000 | -0.130220000 |
| 6  | -1.173388000 | 3.306290000  | 2.565734000  |
| 1  | -1.813093000 | 4.186216000  | 2.446669000  |
| 1  | -1.651356000 | 2.657464000  | 3.302925000  |
| 1  | -0.220082000 | 3.646264000  | 2.979687000  |
| 6  | -0.363804000 | 3.543992000  | 0.185474000  |
| 1  | -1.033532000 | 4.384019000  | -0.019672000 |
| 1  | 0.583139000  | 3.963168000  | 0.538834000  |
| 1  | -0.167027000 | 3.039040000  | -0.767474000 |
| 7  | 0.471802000  | 0.329442000  | -2.639992000 |
| 7  | 0.748123000  | 1.496743000  | -2.898023000 |
| 1  | 0.535999000  | 1.746081000  | -3.890057000 |

$f'_{SB}$  -TS2 (TE = -2864.405525)

|   |              |              |             |
|---|--------------|--------------|-------------|
| 6 | 0.745708000  | 1.607537000  | 2.101941000 |
| 6 | 0.597060000  | 0.175118000  | 2.594750000 |
| 6 | -2.609638000 | 0.902233000  | 1.308381000 |
| 6 | -2.132872000 | -0.080264000 | 2.369155000 |
| 6 | 0.815263000  | -2.717126000 | 1.363588000 |
| 6 | -0.536878000 | -2.190895000 | 1.802051000 |
| 1 | -2.061595000 | 1.847637000  | 1.335969000 |
| 1 | -2.196076000 | 0.448066000  | 3.332824000 |

|    |              |              |              |
|----|--------------|--------------|--------------|
| 1  | 0.835654000  | -3.806286000 | 1.277186000  |
| 1  | -0.836378000 | -2.736693000 | 2.715617000  |
| 1  | 1.499421000  | 2.157704000  | 2.671575000  |
| 1  | 1.543422000  | -0.352439000 | 2.418772000  |
| 6  | 1.053630000  | 3.299226000  | -0.241884000 |
| 1  | 1.446565000  | 3.218728000  | -1.261923000 |
| 6  | -3.404733000 | -1.193063000 | -0.524325000 |
| 1  | -3.153435000 | -1.777390000 | 0.368062000  |
| 6  | 3.110007000  | -1.684575000 | -0.024983000 |
| 1  | 3.141613000  | -1.007905000 | 0.840138000  |
| 23 | 0.040415000  | -0.069879000 | -1.009720000 |
| 16 | -2.375250000 | 0.347903000  | -0.421210000 |
| 16 | 1.333253000  | 1.567637000  | 0.363966000  |
| 16 | 1.301245000  | -2.051658000 | -0.284354000 |
| 1  | -0.189322000 | 2.172233000  | 2.157471000  |
| 1  | 0.516681000  | 0.222036000  | 3.695687000  |
| 1  | -1.312215000 | -2.494290000 | 1.083688000  |
| 1  | 1.608545000  | -2.432308000 | 2.060877000  |
| 1  | -2.864838000 | -0.895980000 | 2.444680000  |
| 1  | -3.666882000 | 1.160729000  | 1.422275000  |
| 6  | 3.852631000  | -2.970619000 | 0.273712000  |
| 1  | 4.907423000  | -2.749700000 | 0.464089000  |
| 1  | 3.468142000  | -3.491071000 | 1.154097000  |
| 1  | 3.806578000  | -3.660570000 | -0.573431000 |
| 6  | 3.632997000  | -0.978052000 | -1.257681000 |
| 1  | 3.508438000  | -1.590136000 | -2.155895000 |
| 1  | 3.139760000  | -0.019056000 | -1.430747000 |
| 1  | 4.702867000  | -0.784197000 | -1.138533000 |
| 6  | -4.876716000 | -0.838388000 | -0.513989000 |
| 1  | -5.479004000 | -1.751662000 | -0.541680000 |
| 1  | -5.168207000 | -0.289335000 | 0.385143000  |
| 1  | -5.149630000 | -0.233443000 | -1.382830000 |
| 6  | -2.973264000 | -1.945922000 | -1.767258000 |
| 1  | -3.098514000 | -1.344506000 | -2.672965000 |
| 1  | -1.926696000 | -2.266785000 | -1.716361000 |
| 1  | -3.581996000 | -2.846156000 | -1.889627000 |
| 6  | -0.411430000 | 3.677018000  | -0.298541000 |
| 1  | -0.995850000 | 2.993918000  | -0.921369000 |
| 1  | -0.864205000 | 3.724099000  | 0.697517000  |
| 1  | -0.516161000 | 4.676198000  | -0.732849000 |
| 6  | 1.886939000  | 4.270228000  | 0.571221000  |
| 1  | 2.940285000  | 3.984610000  | 0.607986000  |
| 1  | 1.827567000  | 5.268215000  | 0.127066000  |
| 1  | 1.521414000  | 4.358442000  | 1.598967000  |
| 5  | -0.670525000 | -0.667518000 | 2.175271000  |
| 7  | 0.580844000  | 1.317157000  | -3.068438000 |

|   |             |             |              |
|---|-------------|-------------|--------------|
| 7 | 0.549693000 | 0.101098000 | -2.799186000 |
| 1 | 0.515797000 | 1.497457000 | -4.092175000 |

**a''<sub>PC</sub> -TS2 (TE = -3519.746765)**

|    |              |              |              |
|----|--------------|--------------|--------------|
| 6  | -0.649221000 | -1.297457000 | 1.662390000  |
| 6  | -0.058188000 | -2.016896000 | 2.715767000  |
| 1  | 0.830416000  | -1.615101000 | 3.196979000  |
| 6  | -0.594879000 | -3.209775000 | 3.180150000  |
| 1  | -0.111490000 | -3.730755000 | 4.003687000  |
| 6  | -1.755338000 | -3.728460000 | 2.612941000  |
| 1  | -2.185966000 | -4.655911000 | 2.980991000  |
| 6  | -2.344647000 | -3.057572000 | 1.549108000  |
| 1  | -3.218743000 | -3.493336000 | 1.068572000  |
| 6  | -1.806299000 | -1.864064000 | 1.055822000  |
| 6  | 1.217116000  | 0.392458000  | 1.847119000  |
| 6  | 1.294120000  | 1.177951000  | 3.006437000  |
| 1  | 0.378873000  | 1.547001000  | 3.461935000  |
| 6  | 2.511103000  | 1.507099000  | 3.589952000  |
| 1  | 2.529428000  | 2.124548000  | 4.485117000  |
| 6  | 3.697964000  | 1.050048000  | 3.030254000  |
| 1  | 4.656277000  | 1.306346000  | 3.474667000  |
| 6  | 3.649221000  | 0.271168000  | 1.881462000  |
| 1  | 4.582330000  | -0.057496000 | 1.435132000  |
| 6  | 2.428928000  | -0.057620000 | 1.281366000  |
| 6  | -1.104694000 | 1.155542000  | 1.495548000  |
| 6  | -1.963359000 | 1.128397000  | 2.601350000  |
| 1  | -2.010049000 | 0.230663000  | 3.216238000  |
| 6  | -2.739026000 | 2.231392000  | 2.938019000  |
| 1  | -3.396094000 | 2.184707000  | 3.803740000  |
| 6  | -2.671733000 | 3.394451000  | 2.177567000  |
| 1  | -3.274620000 | 4.259941000  | 2.440269000  |
| 6  | -1.829197000 | 3.441986000  | 1.072119000  |
| 1  | -1.781401000 | 4.351093000  | 0.478695000  |
| 6  | -1.055360000 | 2.332972000  | 0.720288000  |
| 6  | -0.119805000 | 0.038127000  | 1.228485000  |
| 23 | -0.021305000 | -0.238706000 | -1.061381000 |
| 6  | -2.420956000 | -2.721970000 | -1.621685000 |
| 1  | -3.152259000 | -3.406187000 | -1.173023000 |
| 6  | 3.925810000  | -0.457237000 | -1.200999000 |
| 1  | 4.102883000  | 0.575411000  | -0.862045000 |
| 6  | -0.833302000 | 3.083125000  | -2.179063000 |
| 1  | -0.222524000 | 2.736895000  | -3.026813000 |
| 6  | -0.840274000 | 4.607009000  | -2.191682000 |
| 1  | -1.285970000 | 4.961622000  | -3.127220000 |
| 1  | -1.437473000 | 5.034389000  | -1.382311000 |

|    |              |              |              |
|----|--------------|--------------|--------------|
| 1  | 0.158193000  | 5.042496000  | -2.132073000 |
| 6  | -2.240720000 | 2.525061000  | -2.367357000 |
| 1  | -2.901853000 | 2.813044000  | -1.543055000 |
| 1  | -2.683575000 | 2.914301000  | -3.289337000 |
| 1  | -2.248882000 | 1.431384000  | -2.435342000 |
| 6  | -2.883606000 | -2.347652000 | -3.024955000 |
| 1  | -3.913838000 | -1.983114000 | -3.045464000 |
| 1  | -2.254536000 | -1.563358000 | -3.464181000 |
| 1  | -2.835773000 | -3.213468000 | -3.692283000 |
| 6  | -1.066537000 | -3.416106000 | -1.637600000 |
| 1  | -0.755125000 | -3.748833000 | -0.643705000 |
| 1  | -1.083611000 | -4.295955000 | -2.288879000 |
| 1  | -0.275826000 | -2.766744000 | -2.040097000 |
| 6  | 5.144668000  | -1.299282000 | -0.829881000 |
| 1  | 6.041417000  | -0.853231000 | -1.272191000 |
| 1  | 5.324583000  | -1.386508000 | 0.242156000  |
| 1  | 5.072843000  | -2.313546000 | -1.229599000 |
| 6  | 3.756813000  | -0.430825000 | -2.716079000 |
| 1  | 3.509053000  | -1.417452000 | -3.118502000 |
| 1  | 2.970285000  | 0.254220000  | -3.035096000 |
| 1  | 4.690677000  | -0.111992000 | -3.190122000 |
| 15 | -0.009859000 | 2.205121000  | -0.758914000 |
| 15 | 2.316822000  | -0.874407000 | -0.341792000 |
| 15 | -2.332806000 | -1.191403000 | -0.557374000 |
| 6  | 2.237336000  | -2.720039000 | -0.033221000 |
| 1  | 1.187776000  | -2.842800000 | 0.277443000  |
| 6  | 2.431389000  | -3.502523000 | -1.329274000 |
| 1  | 3.483848000  | -3.557529000 | -1.618328000 |
| 1  | 2.082877000  | -4.533093000 | -1.206343000 |
| 1  | 1.887188000  | -3.069059000 | -2.174305000 |
| 6  | 3.104057000  | -3.241469000 | 1.103904000  |
| 1  | 2.835637000  | -4.279115000 | 1.329820000  |
| 1  | 4.167211000  | -3.233875000 | 0.852926000  |
| 1  | 2.973425000  | -2.663841000 | 2.023113000  |
| 6  | -4.094209000 | -0.578443000 | -0.570506000 |
| 1  | -4.210480000 | -0.237942000 | -1.610619000 |
| 6  | -4.314226000 | 0.609599000  | 0.349812000  |
| 1  | -4.248260000 | 0.312036000  | 1.399370000  |
| 1  | -3.594985000 | 1.415712000  | 0.189244000  |
| 1  | -5.316281000 | 1.020508000  | 0.191683000  |
| 6  | -5.120917000 | -1.668963000 | -0.291319000 |
| 1  | -6.129923000 | -1.252518000 | -0.372808000 |
| 1  | -5.068028000 | -2.510503000 | -0.985759000 |
| 1  | -5.024229000 | -2.059658000 | 0.726456000  |
| 6  | 1.610823000  | 3.048905000  | -0.404612000 |
| 1  | 2.123606000  | 2.314120000  | 0.230388000  |

|   |             |              |              |
|---|-------------|--------------|--------------|
| 6 | 1.507949000 | 4.341442000  | 0.393401000  |
| 1 | 2.510681000 | 4.706304000  | 0.639706000  |
| 1 | 1.001562000 | 5.140585000  | -0.153766000 |
| 1 | 0.975759000 | 4.195633000  | 1.337207000  |
| 6 | 2.415392000 | 3.191871000  | -1.691740000 |
| 1 | 3.442918000 | 3.495410000  | -1.468159000 |
| 1 | 2.465445000 | 2.252072000  | -2.252180000 |
| 1 | 1.999145000 | 3.948689000  | -2.362671000 |
| 7 | 0.339951000 | 0.049118000  | -3.007204000 |
| 7 | 0.633365000 | -1.001550000 | -3.556550000 |
| 1 | 0.144734000 | -1.122119000 | -4.479746000 |

**b''<sub>PSi</sub> -TS2 (TE = -3771.168080)**

|    |              |              |              |
|----|--------------|--------------|--------------|
| 6  | 1.821644000  | -1.128750000 | 1.809254000  |
| 6  | 2.060851000  | -1.519750000 | 3.133500000  |
| 1  | 1.237610000  | -1.555730000 | 3.846941000  |
| 6  | 3.340993000  | -1.847460000 | 3.563832000  |
| 1  | 3.511060000  | -2.141450000 | 4.597085000  |
| 6  | 4.408610000  | -1.793435000 | 2.671021000  |
| 1  | 5.411501000  | -2.050695000 | 3.003376000  |
| 6  | 4.196681000  | -1.401027000 | 1.355342000  |
| 1  | 5.043850000  | -1.356470000 | 0.673482000  |
| 6  | 2.909882000  | -1.061321000 | 0.919690000  |
| 6  | -0.762795000 | 0.548573000  | 2.212909000  |
| 6  | -1.365016000 | 0.158573000  | 3.416838000  |
| 1  | -1.304490000 | -0.881980000 | 3.737352000  |
| 6  | -2.073542000 | 1.063249000  | 4.198847000  |
| 1  | -2.541958000 | 0.735971000  | 5.124317000  |
| 6  | -2.193138000 | 2.387073000  | 3.786411000  |
| 1  | -2.748551000 | 3.100927000  | 4.389864000  |
| 6  | -1.609596000 | 2.797917000  | 2.593917000  |
| 1  | -1.723503000 | 3.832701000  | 2.284686000  |
| 6  | -0.898360000 | 1.889929000  | 1.800961000  |
| 6  | -0.978205000 | -2.233260000 | 1.059680000  |
| 6  | -0.798117000 | -3.360636000 | 1.868379000  |
| 1  | 0.038293000  | -3.394042000 | 2.566770000  |
| 6  | -1.654804000 | -4.452924000 | 1.783140000  |
| 1  | -1.492781000 | -5.325062000 | 2.412660000  |
| 6  | -2.720080000 | -4.426990000 | 0.888980000  |
| 1  | -3.397685000 | -5.274478000 | 0.819745000  |
| 6  | -2.919946000 | -3.316534000 | 0.075950000  |
| 1  | -3.762432000 | -3.311814000 | -0.607478000 |
| 6  | -2.048894000 | -2.224023000 | 0.140666000  |
| 23 | 0.150547000  | 0.265715000  | -1.229457000 |
| 6  | 4.130985000  | 0.251564000  | -1.376338000 |
| 1  | 4.887139000  | -0.541586000 | -1.301186000 |

|    |              |              |              |
|----|--------------|--------------|--------------|
| 6  | -1.429556000 | 3.552060000  | -0.585003000 |
| 1  | -2.393346000 | 3.144985000  | -0.244304000 |
| 6  | -2.930715000 | -1.258157000 | -2.570221000 |
| 1  | -2.910910000 | -0.302969000 | -3.118770000 |
| 6  | -4.362251000 | -1.794084000 | -2.620146000 |
| 1  | -4.753774000 | -1.681660000 | -3.636406000 |
| 1  | -4.403500000 | -2.862269000 | -2.396602000 |
| 1  | -5.059468000 | -1.288827000 | -1.951964000 |
| 6  | -1.987496000 | -2.227264000 | -3.274080000 |
| 1  | -1.896389000 | -3.167363000 | -2.718865000 |
| 1  | -2.379264000 | -2.477842000 | -4.264989000 |
| 1  | -0.985189000 | -1.815536000 | -3.412970000 |
| 6  | 4.023130000  | 0.680806000  | -2.833082000 |
| 1  | 3.748463000  | -0.140527000 | -3.501258000 |
| 1  | 3.277822000  | 1.470822000  | -2.963390000 |
| 1  | 4.982972000  | 1.073297000  | -3.183102000 |
| 6  | 4.568707000  | 1.406845000  | -0.488464000 |
| 1  | 4.617857000  | 1.138662000  | 0.569992000  |
| 1  | 5.564695000  | 1.750359000  | -0.785032000 |
| 1  | 3.897689000  | 2.261383000  | -0.587797000 |
| 6  | -1.354814000 | 5.011923000  | -0.145275000 |
| 1  | -2.201151000 | 5.560689000  | -0.571337000 |
| 1  | -1.394593000 | 5.155987000  | 0.934573000  |
| 1  | -0.450025000 | 5.505594000  | -0.507454000 |
| 6  | -1.394196000 | 3.474552000  | -2.110245000 |
| 1  | -0.440383000 | 3.824627000  | -2.516527000 |
| 1  | -1.546842000 | 2.458256000  | -2.488639000 |
| 1  | -2.181699000 | 4.102697000  | -2.539479000 |
| 15 | -2.221186000 | -0.730895000 | -0.918103000 |
| 15 | -0.213776000 | 2.330927000  | 0.160172000  |
| 15 | 2.542296000  | -0.535816000 | -0.797825000 |
| 6  | 1.404631000  | 3.199756000  | 0.479194000  |
| 1  | 2.061681000  | 2.354551000  | 0.740701000  |
| 6  | 1.920109000  | 3.821780000  | -0.814889000 |
| 1  | 1.317731000  | 4.679959000  | -1.123185000 |
| 1  | 2.940862000  | 4.193787000  | -0.683527000 |
| 1  | 1.927059000  | 3.110223000  | -1.648684000 |
| 6  | 1.421842000  | 4.176447000  | 1.645934000  |
| 1  | 2.447591000  | 4.512879000  | 1.829089000  |
| 1  | 0.824850000  | 5.070397000  | 1.452430000  |
| 1  | 1.059213000  | 3.723987000  | 2.572014000  |
| 6  | 2.508086000  | -2.135561000 | -1.776127000 |
| 1  | 2.430222000  | -1.791671000 | -2.817051000 |
| 6  | 1.248683000  | -2.919370000 | -1.437050000 |
| 1  | 1.241860000  | -3.245995000 | -0.391258000 |
| 1  | 0.329232000  | -2.341265000 | -1.597886000 |

|    |              |              |              |
|----|--------------|--------------|--------------|
| 1  | 1.166679000  | -3.816012000 | -2.060433000 |
| 6  | 3.745260000  | -3.005209000 | -1.622863000 |
| 1  | 3.649828000  | -3.901620000 | -2.244243000 |
| 1  | 4.666076000  | -2.504015000 | -1.931591000 |
| 1  | 3.875425000  | -3.345363000 | -0.590733000 |
| 6  | -3.531758000 | 0.328539000  | -0.091229000 |
| 1  | -2.937577000 | 0.944081000  | 0.595965000  |
| 6  | -4.536954000 | -0.437557000 | 0.758191000  |
| 1  | -5.223626000 | 0.266467000  | 1.240218000  |
| 1  | -5.147479000 | -1.132526000 | 0.174389000  |
| 1  | -4.050807000 | -1.013435000 | 1.549210000  |
| 6  | -4.206287000 | 1.268241000  | -1.086433000 |
| 1  | -4.759368000 | 2.045052000  | -0.548638000 |
| 1  | -3.496302000 | 1.775813000  | -1.745090000 |
| 1  | -4.928030000 | 0.754559000  | -1.725426000 |
| 14 | 0.128448000  | -0.702155000 | 1.096513000  |
| 7  | 0.603961000  | 0.127745000  | -3.042002000 |
| 7  | 0.755750000  | 1.253350000  | -3.529309000 |
| 1  | 0.243581000  | 1.354223000  | -4.434855000 |

$c''_{PB}$  -TS2 (TE = -3506.505196)

|   |              |              |             |
|---|--------------|--------------|-------------|
| 6 | -1.563409000 | 0.101740000  | 1.980529000 |
| 6 | -1.708813000 | 0.577069000  | 3.297590000 |
| 1 | -0.817387000 | 0.764345000  | 3.895325000 |
| 6 | -2.953502000 | 0.815863000  | 3.867090000 |
| 1 | -3.020063000 | 1.178802000  | 4.890227000 |
| 6 | -4.108249000 | 0.603808000  | 3.122487000 |
| 1 | -5.087670000 | 0.795822000  | 3.553617000 |
| 6 | -3.998544000 | 0.158990000  | 1.811765000 |
| 1 | -4.904728000 | 0.020056000  | 1.226368000 |
| 6 | -2.747759000 | -0.093222000 | 1.238010000 |
| 6 | 0.546869000  | -1.650129000 | 1.675807000 |
| 6 | 0.115492000  | -2.439038000 | 2.755987000 |
| 1 | -0.774997000 | -2.137090000 | 3.306784000 |
| 6 | 0.816720000  | -3.566560000 | 3.168107000 |
| 1 | 0.461260000  | -4.148230000 | 4.015646000 |
| 6 | 1.983355000  | -3.937150000 | 2.507921000 |
| 1 | 2.549755000  | -4.805537000 | 2.835422000 |
| 6 | 2.412570000  | -3.200688000 | 1.408036000 |
| 1 | 3.311988000  | -3.513588000 | 0.881946000 |
| 6 | 1.699895000  | -2.081602000 | 0.973022000 |
| 6 | 0.986289000  | 0.963341000  | 1.777707000 |
| 6 | 1.710898000  | 0.828380000  | 2.978818000 |
| 1 | 1.599531000  | -0.084490000 | 3.564028000 |
| 6 | 2.567236000  | 1.817405000  | 3.444883000 |
| 1 | 3.100015000  | 1.674435000  | 4.382359000 |



|    |              |              |              |
|----|--------------|--------------|--------------|
| 6  | 2.760374000  | 2.974953000  | 2.699125000  |
| 1  | 3.440374000  | 3.749611000  | 3.044586000  |
| 6  | 2.090451000  | 3.122891000  | 1.492775000  |
| 1  | 2.271786000  | 4.012982000  | 0.895404000  |
| 6  | 1.201264000  | 2.142755000  | 1.033820000  |
| 23 | -0.165254000 | -0.114993000 | -1.185115000 |
| 6  | -3.121855000 | -2.350426000 | -0.587942000 |
| 1  | -4.178214000 | -2.347716000 | -0.285464000 |
| 6  | 3.895929000  | -0.779697000 | -0.507476000 |
| 1  | 4.418479000  | -1.736353000 | -0.364576000 |
| 6  | -0.792935000 | 3.665908000  | -0.549796000 |
| 1  | -0.924319000 | 3.963523000  | -1.601814000 |
| 6  | -0.384291000 | 4.876303000  | 0.280166000  |
| 1  | -1.176324000 | 5.630707000  | 0.234252000  |
| 1  | -0.261667000 | 4.605914000  | 1.333131000  |
| 1  | 0.534682000  | 5.357843000  | -0.051166000 |
| 6  | -2.113295000 | 3.119773000  | -0.026722000 |
| 1  | -2.020410000 | 2.761101000  | 1.004312000  |
| 1  | -2.881649000 | 3.899379000  | -0.031736000 |
| 1  | -2.476243000 | 2.292631000  | -0.634747000 |
| 6  | -3.011779000 | -2.899464000 | -2.005189000 |
| 1  | -3.451190000 | -3.900513000 | -2.059852000 |
| 1  | -3.522404000 | -2.280544000 | -2.748388000 |
| 1  | -1.969646000 | -2.981727000 | -2.325237000 |
| 6  | -2.347273000 | -3.200412000 | 0.406679000  |
| 1  | -2.467456000 | -2.848376000 | 1.434594000  |
| 1  | -2.697042000 | -4.237154000 | 0.368658000  |
| 1  | -1.274309000 | -3.215447000 | 0.191573000  |
| 6  | 4.365580000  | -0.152049000 | -1.814158000 |
| 1  | 5.456859000  | -0.072597000 | -1.829713000 |
| 1  | 4.068868000  | -0.717623000 | -2.702684000 |
| 1  | 3.970571000  | 0.861215000  | -1.928542000 |
| 6  | 4.204438000  | 0.107320000  | 0.685948000  |
| 1  | 3.695827000  | 1.074177000  | 0.621128000  |
| 1  | 3.912921000  | -0.354977000 | 1.632155000  |
| 1  | 5.279499000  | 0.309373000  | 0.733500000  |
| 5  | -0.071920000 | -0.205561000 | 1.530731000  |
| 15 | -2.607917000 | -0.557182000 | -0.521135000 |
| 15 | 2.100801000  | -1.260716000 | -0.616463000 |
| 15 | 0.459111000  | 2.279723000  | -0.624505000 |
| 6  | 2.131798000  | -2.666979000 | -1.878743000 |
| 1  | 1.972479000  | -2.133852000 | -2.827740000 |
| 6  | 0.944806000  | -3.595969000 | -1.657167000 |
| 1  | 0.816165000  | -4.264682000 | -2.514025000 |
| 1  | 1.084274000  | -4.218463000 | -0.768012000 |
| 1  | 0.002605000  | -3.057305000 | -1.533637000 |

|   |              |              |              |
|---|--------------|--------------|--------------|
| 6 | 3.418080000  | -3.473962000 | -1.998940000 |
| 1 | 3.305607000  | -4.210140000 | -2.801895000 |
| 1 | 4.295032000  | -2.871844000 | -2.243780000 |
| 1 | 3.642499000  | -4.041322000 | -1.091696000 |
| 6 | -4.019020000 | 0.352915000  | -1.377711000 |
| 1 | -4.181606000 | 1.221980000  | -0.727231000 |
| 6 | -5.343987000 | -0.394265000 | -1.478739000 |
| 1 | -6.103283000 | 0.271946000  | -1.900726000 |
| 1 | -5.287542000 | -1.263196000 | -2.139401000 |
| 1 | -5.725939000 | -0.741473000 | -0.515857000 |
| 6 | -3.573070000 | 0.857482000  | -2.745799000 |
| 1 | -4.346461000 | 1.491628000  | -3.191060000 |
| 1 | -2.647301000 | 1.442014000  | -2.698305000 |
| 1 | -3.392099000 | 0.033296000  | -3.443371000 |
| 6 | 1.873189000  | 2.848571000  | -1.730752000 |
| 1 | 2.756781000  | 2.458371000  | -1.204691000 |
| 6 | 1.781831000  | 2.166474000  | -3.091558000 |
| 1 | 0.869757000  | 2.443942000  | -3.629597000 |
| 1 | 2.632849000  | 2.454946000  | -3.717365000 |
| 1 | 1.790871000  | 1.074180000  | -3.014469000 |
| 6 | 2.046906000  | 4.350928000  | -1.912578000 |
| 1 | 1.151530000  | 4.825937000  | -2.325056000 |
| 1 | 2.309884000  | 4.874140000  | -0.992213000 |
| 1 | 2.858141000  | 4.538028000  | -2.623377000 |
| 7 | -0.475665000 | -0.930319000 | -2.897498000 |
| 7 | -0.554076000 | -0.017577000 | -3.716066000 |
| 1 | -0.479369000 | -0.345085000 | -4.705098000 |

**d''<sub>sc</sub> -TS2 (TE = -3334.901751)**

|   |              |              |              |
|---|--------------|--------------|--------------|
| 6 | -0.562452000 | 1.697323000  | 0.857015000  |
| 6 | -0.051264000 | 2.623249000  | 1.778986000  |
| 1 | 0.795617000  | 2.337529000  | 2.397583000  |
| 6 | -0.610340000 | 3.884160000  | 1.940472000  |
| 1 | -0.190807000 | 4.565563000  | 2.676650000  |
| 6 | -1.704264000 | 4.274732000  | 1.174551000  |
| 1 | -2.147818000 | 5.258389000  | 1.302164000  |
| 6 | -2.199090000 | 3.408945000  | 0.208678000  |
| 1 | -3.010393000 | 3.722342000  | -0.444745000 |
| 6 | -1.638498000 | 2.142343000  | 0.045778000  |
| 6 | -1.091074000 | -0.715882000 | 1.170823000  |
| 6 | -1.817400000 | -0.487829000 | 2.350479000  |
| 1 | -1.701661000 | 0.469574000  | 2.855648000  |
| 6 | -2.668862000 | -1.440632000 | 2.890036000  |
| 1 | -3.192997000 | -1.231286000 | 3.819323000  |
| 6 | -2.865654000 | -2.653420000 | 2.234947000  |
| 1 | -3.537804000 | -3.402378000 | 2.644835000  |

|    |              |              |              |
|----|--------------|--------------|--------------|
| 6  | -2.227247000 | -2.882785000 | 1.024863000  |
| 1  | -2.418570000 | -3.798073000 | 0.469034000  |
| 6  | -1.344441000 | -1.930795000 | 0.507290000  |
| 6  | 1.261498000  | 0.001230000  | 1.468719000  |
| 6  | 1.284115000  | -0.119627000 | 2.867186000  |
| 1  | 0.364393000  | 0.030388000  | 3.425205000  |
| 6  | 2.441230000  | -0.428445000 | 3.568552000  |
| 1  | 2.407677000  | -0.506595000 | 4.652406000  |
| 6  | 3.633103000  | -0.655437000 | 2.887579000  |
| 1  | 4.538649000  | -0.921787000 | 3.426039000  |
| 6  | 3.647873000  | -0.561926000 | 1.504884000  |
| 1  | 4.556024000  | -0.780798000 | 0.949126000  |
| 6  | 2.482127000  | -0.220872000 | 0.812735000  |
| 16 | 2.565868000  | -0.178781000 | -0.972866000 |
| 16 | -2.131827000 | 1.172083000  | -1.375535000 |
| 16 | -0.647587000 | -2.247141000 | -1.111501000 |
| 23 | 0.130613000  | 0.069974000  | -1.396183000 |
| 6  | -3.898213000 | 0.576054000  | -1.151110000 |
| 1  | -4.469249000 | 1.443648000  | -1.500998000 |
| 6  | 0.559945000  | -3.661216000 | -0.861018000 |
| 1  | -0.115324000 | -4.512118000 | -0.712400000 |
| 6  | 3.385600000  | 1.482952000  | -1.308435000 |
| 1  | 3.150377000  | 1.611517000  | -2.371179000 |
| 6  | 4.882427000  | 1.367530000  | -1.115384000 |
| 1  | 5.363971000  | 2.289461000  | -1.456242000 |
| 1  | 5.142882000  | 1.246243000  | -0.060097000 |
| 1  | 5.316398000  | 0.537111000  | -1.676171000 |
| 6  | 2.770546000  | 2.594193000  | -0.489244000 |
| 1  | 2.938782000  | 2.441499000  | 0.581359000  |
| 1  | 3.242301000  | 3.545161000  | -0.756858000 |
| 1  | 1.696977000  | 2.699580000  | -0.658344000 |
| 6  | -4.077549000 | -0.579506000 | -2.113365000 |
| 1  | -3.782341000 | -0.328609000 | -3.135640000 |
| 1  | -3.500823000 | -1.453357000 | -1.793619000 |
| 1  | -5.131190000 | -0.872362000 | -2.140387000 |
| 6  | -4.282887000 | 0.242004000  | 0.266181000  |
| 1  | -3.993823000 | 1.019442000  | 0.978219000  |
| 1  | -5.372145000 | 0.139790000  | 0.319421000  |
| 1  | -3.849197000 | -0.704718000 | 0.589495000  |
| 6  | 1.312371000  | -3.816974000 | -2.165578000 |
| 1  | 1.966126000  | -4.691735000 | -2.108465000 |
| 1  | 0.647289000  | -3.958402000 | -3.020795000 |
| 1  | 1.949342000  | -2.948506000 | -2.363792000 |
| 6  | 1.457500000  | -3.487436000 | 0.339176000  |
| 1  | 2.224507000  | -2.731939000 | 0.160893000  |
| 1  | 0.910539000  | -3.216089000 | 1.246355000  |

|   |              |              |              |
|---|--------------|--------------|--------------|
| 1 | 1.973291000  | -4.432402000 | 0.538160000  |
| 6 | -0.035682000 | 0.294158000  | 0.718740000  |
| 7 | 0.651465000  | 1.122860000  | -3.829373000 |
| 7 | 0.574395000  | 1.444655000  | -2.652821000 |
| 1 | 0.800092000  | 1.936767000  | -4.467391000 |

$e''_{SSi}$  -TS2 (TE = -3586.295926)

|    |              |              |              |
|----|--------------|--------------|--------------|
| 6  | -1.062806000 | 0.588780000  | 1.876557000  |
| 6  | -1.756210000 | 1.540062000  | 2.637750000  |
| 1  | -1.850237000 | 2.561128000  | 2.268150000  |
| 6  | -2.340681000 | 1.207275000  | 3.854972000  |
| 1  | -2.870262000 | 1.964201000  | 4.428405000  |
| 6  | -2.260054000 | -0.097466000 | 4.334142000  |
| 1  | -2.724275000 | -0.363620000 | 5.280361000  |
| 6  | -1.605529000 | -1.071742000 | 3.589514000  |
| 1  | -1.566105000 | -2.100189000 | 3.941674000  |
| 6  | -1.011458000 | -0.718607000 | 2.378300000  |
| 6  | 1.289301000  | 2.041594000  | 0.415788000  |
| 6  | 1.402271000  | 3.161680000  | 1.247530000  |
| 1  | 0.568332000  | 3.436339000  | 1.892944000  |
| 6  | 2.564425000  | 3.925721000  | 1.281288000  |
| 1  | 2.633319000  | 4.785049000  | 1.943512000  |
| 6  | 3.637405000  | 3.591022000  | 0.461476000  |
| 1  | 4.543885000  | 4.190846000  | 0.472565000  |
| 6  | 3.560351000  | 2.485752000  | -0.379810000 |
| 1  | 4.399868000  | 2.236572000  | -1.023870000 |
| 6  | 2.401541000  | 1.713788000  | -0.372574000 |
| 6  | -1.510413000 | 1.827910000  | -0.875412000 |
| 6  | -1.726628000 | 3.207812000  | -0.963308000 |
| 1  | -1.124732000 | 3.887289000  | -0.360175000 |
| 6  | -2.691260000 | 3.730557000  | -1.819336000 |
| 1  | -2.842182000 | 4.806018000  | -1.875167000 |
| 6  | -3.453294000 | 2.881002000  | -2.616027000 |
| 1  | -4.196633000 | 3.288789000  | -3.296291000 |
| 6  | -3.250420000 | 1.505908000  | -2.561823000 |
| 1  | -3.823198000 | 0.837679000  | -3.200509000 |
| 6  | -2.290656000 | 0.995178000  | -1.689890000 |
| 16 | -1.992335000 | -0.782512000 | -1.684083000 |
| 16 | -0.218426000 | -2.020317000 | 1.424046000  |
| 16 | 2.241499000  | 0.276680000  | -1.446909000 |
| 23 | 0.374823000  | -1.215822000 | -0.892758000 |
| 6  | 1.416873000  | -2.199632000 | 2.316125000  |
| 1  | 1.133237000  | -2.598663000 | 3.297369000  |
| 6  | 3.962686000  | -0.433784000 | -1.618170000 |
| 1  | 4.501445000  | 0.320035000  | -2.203691000 |
| 6  | -3.241902000 | -1.448242000 | -0.449517000 |

|    |              |              |              |
|----|--------------|--------------|--------------|
| 1  | -2.917578000 | -1.071381000 | 0.527647000  |
| 6  | -3.142697000 | -2.958932000 | -0.505071000 |
| 1  | -3.826914000 | -3.394894000 | 0.228842000  |
| 1  | -3.428845000 | -3.340768000 | -1.489747000 |
| 1  | -2.139025000 | -3.324127000 | -0.278330000 |
| 6  | -4.629273000 | -0.938813000 | -0.767137000 |
| 1  | -4.952721000 | -1.242148000 | -1.767818000 |
| 1  | -5.338010000 | -1.364414000 | -0.049891000 |
| 1  | -4.706033000 | 0.147769000  | -0.694884000 |
| 6  | 2.216821000  | -3.232597000 | 1.549316000  |
| 1  | 1.686573000  | -4.182070000 | 1.445156000  |
| 1  | 2.462993000  | -2.881034000 | 0.539584000  |
| 1  | 3.163353000  | -3.427962000 | 2.061796000  |
| 6  | 2.124792000  | -0.872576000 | 2.467295000  |
| 1  | 1.542880000  | -0.152389000 | 3.047924000  |
| 1  | 3.080140000  | -1.017506000 | 2.982802000  |
| 1  | 2.342125000  | -0.419777000 | 1.494180000  |
| 6  | 4.644295000  | -0.672476000 | -0.289731000 |
| 1  | 5.678237000  | -0.986095000 | -0.466639000 |
| 1  | 4.676489000  | 0.216265000  | 0.343911000  |
| 1  | 4.152967000  | -1.470847000 | 0.272192000  |
| 6  | 3.816558000  | -1.702143000 | -2.435795000 |
| 1  | 3.291129000  | -2.481824000 | -1.870984000 |
| 1  | 3.285253000  | -1.540476000 | -3.377384000 |
| 1  | 4.806862000  | -2.096676000 | -2.678618000 |
| 14 | -0.244805000 | 0.958236000  | 0.214124000  |
| 7  | 0.115020000  | -3.068219000 | -1.546907000 |
| 7  | 0.123323000  | -3.037287000 | -2.766778000 |
| 1  | 0.619584000  | -3.857773000 | -3.191106000 |

$f''_{SB}$  -TS2 (TE = -3321.660693)

|   |              |              |             |
|---|--------------|--------------|-------------|
| 6 | -1.280053000 | 0.092808000  | 1.737944000 |
| 6 | -1.286471000 | 0.385985000  | 3.115237000 |
| 1 | -0.345074000 | 0.367380000  | 3.663872000 |
| 6 | -2.453079000 | 0.692879000  | 3.803115000 |
| 1 | -2.412666000 | 0.898842000  | 4.869935000 |
| 6 | -3.667224000 | 0.753480000  | 3.125360000 |
| 1 | -4.582719000 | 1.010529000  | 3.651614000 |
| 6 | -3.697478000 | 0.505213000  | 1.761226000 |
| 1 | -4.632447000 | 0.579914000  | 1.209818000 |
| 6 | -2.520106000 | 0.168356000  | 1.087988000 |
| 6 | 0.749529000  | -1.689245000 | 1.129614000 |
| 6 | 0.422618000  | -2.550867000 | 2.194116000 |
| 1 | -0.370703000 | -2.256546000 | 2.880597000 |

|    |              |              |              |
|----|--------------|--------------|--------------|
| 6  | 1.112863000  | -3.734383000 | 2.421017000  |
| 1  | 0.850628000  | -4.361105000 | 3.269861000  |
| 6  | 2.138192000  | -4.119909000 | 1.561257000  |
| 1  | 2.677922000  | -5.048088000 | 1.730344000  |
| 6  | 2.440850000  | -3.337046000 | 0.453215000  |
| 1  | 3.189504000  | -3.669202000 | -0.262781000 |
| 6  | 1.760262000  | -2.138904000 | 0.246427000  |
| 6  | 1.172580000  | 0.958630000  | 1.133744000  |
| 6  | 2.040311000  | 0.955520000  | 2.241280000  |
| 1  | 2.039035000  | 0.095001000  | 2.910439000  |
| 6  | 2.900751000  | 2.013778000  | 2.508448000  |
| 1  | 3.542905000  | 1.979179000  | 3.385329000  |
| 6  | 2.963592000  | 3.099151000  | 1.640134000  |
| 1  | 3.651213000  | 3.919354000  | 1.828516000  |
| 6  | 2.155047000  | 3.117641000  | 0.510764000  |
| 1  | 2.217607000  | 3.939850000  | -0.198364000 |
| 6  | 1.254485000  | 2.074293000  | 0.285086000  |
| 16 | 0.285301000  | 2.141047000  | -1.221886000 |
| 16 | -2.663363000 | -0.108253000 | -0.681548000 |
| 16 | 1.984929000  | -1.284600000 | -1.309822000 |
| 23 | -0.277285000 | -0.250742000 | -1.419124000 |
| 6  | -3.432615000 | -1.820321000 | -0.689488000 |
| 1  | -4.295775000 | -1.674046000 | -0.028417000 |
| 6  | 3.727049000  | -0.595803000 | -1.409817000 |
| 1  | 4.305790000  | -1.464878000 | -1.742246000 |
| 6  | -1.256191000 | 3.114677000  | -0.770182000 |
| 1  | -1.771138000 | 2.513011000  | -0.012502000 |
| 6  | -2.071685000 | 3.203728000  | -2.043717000 |
| 1  | -3.036531000 | 3.672511000  | -1.830713000 |
| 1  | -1.566836000 | 3.814211000  | -2.797906000 |
| 1  | -2.276828000 | 2.223289000  | -2.483326000 |
| 6  | -0.880741000 | 4.461961000  | -0.199945000 |
| 1  | -0.310474000 | 5.059985000  | -0.917254000 |
| 1  | -1.792240000 | 5.017874000  | 0.040775000  |
| 1  | -0.298696000 | 4.378148000  | 0.720290000  |
| 6  | -3.906335000 | -2.142340000 | -2.089358000 |
| 1  | -4.548082000 | -1.361651000 | -2.504069000 |
| 1  | -3.067748000 | -2.302991000 | -2.770639000 |
| 1  | -4.484973000 | -3.070479000 | -2.068023000 |
| 6  | -2.496207000 | -2.853694000 | -0.108569000 |
| 1  | -2.164903000 | -2.590973000 | 0.899345000  |
| 1  | -3.004164000 | -3.821673000 | -0.046267000 |
| 1  | -1.611113000 | -2.989763000 | -0.739398000 |
| 6  | 3.690672000  | 0.451577000  | -2.503490000 |
| 1  | 4.706942000  | 0.796442000  | -2.715067000 |
| 1  | 3.272331000  | 0.071751000  | -3.439555000 |

|   |              |              |              |
|---|--------------|--------------|--------------|
| 1 | 3.105449000  | 1.324181000  | -2.194611000 |
| 6 | 4.262450000  | -0.078649000 | -0.099363000 |
| 1 | 3.794075000  | 0.865372000  | 0.182135000  |
| 1 | 4.132173000  | -0.788239000 | 0.721942000  |
| 1 | 5.337081000  | 0.104543000  | -0.204641000 |
| 5 | 0.131233000  | -0.244478000 | 1.092143000  |
| 7 | -0.762366000 | -1.392180000 | -2.859953000 |
| 7 | -0.788277000 | -0.917130000 | -3.986504000 |
| 1 | -0.989022000 | -1.629747000 | -4.724231000 |

Cartesian coordinates of the vanadium nitride complexes for  $[1a'_{PC}]-[1f'_{SB}]$  and  $[1a''_{PC}]-[1f''_{SB}]$ , along with their total energies (in hartree) including zero point vibrational correction at M06-L-D3(heptane)/6-311+G\* level of theory.

$[1a'_{PC}]\equiv N$  (TE = -3007.310110)

|    |              |              |              |
|----|--------------|--------------|--------------|
| 6  | -0.611239000 | 1.773509000  | 1.678235000  |
| 6  | 0.171196000  | 0.614582000  | 2.338052000  |
| 6  | -2.444127000 | -1.021390000 | 1.901517000  |
| 6  | -1.104725000 | -1.565550000 | 2.379141000  |
| 6  | 2.683678000  | -1.116246000 | 1.770020000  |
| 6  | 1.345455000  | -1.560640000 | 2.364011000  |
| 1  | -2.635399000 | -0.031099000 | 2.330196000  |
| 1  | -1.088212000 | -1.544432000 | 3.488843000  |
| 1  | 3.491805000  | -1.824239000 | 1.994988000  |
| 1  | 1.393871000  | -1.444549000 | 3.466402000  |
| 1  | -0.550411000 | 2.661483000  | 2.319891000  |
| 1  | 1.221856000  | 0.938577000  | 2.364970000  |
| 6  | -1.120793000 | 3.485961000  | -0.744517000 |
| 1  | -0.442096000 | 4.323629000  | -0.958311000 |
| 6  | -2.744688000 | -2.612632000 | -0.467492000 |
| 1  | -1.958903000 | -3.157174000 | 0.080729000  |
| 6  | 3.918272000  | 0.210924000  | -0.544497000 |
| 1  | 3.586283000  | 1.208395000  | -0.223851000 |
| 23 | 0.058610000  | -0.306091000 | -0.445708000 |
| 6  | 0.111299000  | -0.846280000 | 1.796555000  |
| 1  | -1.678431000 | 1.551790000  | 1.588062000  |
| 1  | -0.127361000 | 0.597979000  | 3.405266000  |
| 1  | 1.226726000  | -2.638160000 | 2.205042000  |
| 1  | 3.006636000  | -0.156387000 | 2.195548000  |
| 1  | -1.040920000 | -2.633409000 | 2.118333000  |
| 1  | -3.285094000 | -1.646711000 | 2.222325000  |
| 6  | 5.254447000  | -0.043801000 | 0.144274000  |
| 1  | 5.969393000  | 0.744606000  | -0.119722000 |
| 1  | 5.166688000  | -0.043347000 | 1.234465000  |
| 1  | 5.709477000  | -0.992550000 | -0.145107000 |
| 6  | 4.037558000  | 0.244213000  | -2.064144000 |

|   |              |              |              |
|---|--------------|--------------|--------------|
| 1 | 4.447262000  | -0.690049000 | -2.460880000 |
| 1 | 3.067477000  | 0.398175000  | -2.548785000 |
| 1 | 4.706076000  | 1.049571000  | -2.388214000 |
| 6 | -4.096910000 | -3.158961000 | -0.023864000 |
| 1 | -4.135756000 | -4.241925000 | -0.187243000 |
| 1 | -4.320717000 | -2.986210000 | 1.032350000  |
| 1 | -4.913312000 | -2.727644000 | -0.612345000 |
| 6 | -2.523158000 | -2.874944000 | -1.952016000 |
| 1 | -3.323609000 | -2.447659000 | -2.563330000 |
| 1 | -1.570865000 | -2.465454000 | -2.296841000 |
| 1 | -2.524301000 | -3.954615000 | -2.141531000 |
| 6 | -1.715455000 | 3.022469000  | -2.068179000 |
| 1 | -0.943730000 | 2.706409000  | -2.776225000 |
| 1 | -2.383329000 | 2.167186000  | -1.930965000 |
| 1 | -2.296809000 | 3.823776000  | -2.537969000 |
| 6 | -2.188333000 | 3.990345000  | 0.216209000  |
| 1 | -1.768851000 | 4.368564000  | 1.152956000  |
| 1 | -2.758820000 | 4.806012000  | -0.241307000 |
| 1 | -2.910103000 | 3.208051000  | 0.474756000  |
| 6 | 2.742586000  | -2.519287000 | -0.829309000 |
| 1 | 2.468402000  | -2.324172000 | -1.875424000 |
| 6 | 1.756191000  | -3.550233000 | -0.284408000 |
| 1 | 2.059396000  | -3.905421000 | 0.706359000  |
| 1 | 0.738328000  | -3.155635000 | -0.217515000 |
| 1 | 1.729882000  | -4.425767000 | -0.942473000 |
| 6 | 4.157305000  | -3.078419000 | -0.760739000 |
| 1 | 4.177062000  | -4.097728000 | -1.164156000 |
| 1 | 4.879355000  | -2.496924000 | -1.337169000 |
| 1 | 4.527949000  | -3.142458000 | 0.269119000  |
| 6 | -3.844043000 | 0.218487000  | -0.342886000 |
| 1 | -3.433075000 | 1.227192000  | -0.174587000 |
| 6 | -5.069244000 | 0.077811000  | 0.552411000  |
| 1 | -5.551673000 | -0.896810000 | 0.447283000  |
| 1 | -4.835335000 | 0.214874000  | 1.611394000  |
| 1 | -5.818313000 | 0.833770000  | 0.288374000  |
| 6 | -4.211338000 | 0.113253000  | -1.818162000 |
| 1 | -4.759623000 | -0.811748000 | -2.023018000 |
| 1 | -4.860931000 | 0.942087000  | -2.120926000 |
| 1 | -3.332650000 | 0.120805000  | -2.471360000 |
| 6 | 1.574814000  | 3.097956000  | 0.285226000  |
| 1 | 2.200107000  | 2.369211000  | 0.823264000  |
| 6 | 1.427215000  | 4.338850000  | 1.153422000  |
| 1 | 2.400820000  | 4.814359000  | 1.315964000  |
| 1 | 0.785561000  | 5.092824000  | 0.684110000  |
| 1 | 1.010989000  | 4.118215000  | 2.140201000  |
| 6 | 2.243470000  | 3.418457000  | -1.046558000 |



|    |              |              |              |
|----|--------------|--------------|--------------|
| 1  | 3.254515000  | 3.813653000  | -0.898447000 |
| 1  | 2.318925000  | 2.538542000  | -1.692582000 |
| 1  | 1.685245000  | 4.180989000  | -1.602005000 |
| 15 | -2.368417000 | -0.856068000 | 0.064452000  |
| 15 | -0.005277000 | 2.158650000  | -0.028588000 |
| 15 | 2.466171000  | -0.849370000 | -0.038634000 |
| 7  | 0.112395000  | -1.092450000 | -1.829979000 |

[1b'<sub>psi</sub>]=N (TE = -3258.737756)

|    |              |              |              |
|----|--------------|--------------|--------------|
| 6  | -0.486965000 | 1.993018000  | 1.830534000  |
| 6  | 0.222782000  | 0.799162000  | 2.488692000  |
| 6  | -2.677511000 | -0.863862000 | 1.865069000  |
| 6  | -1.576555000 | -1.649838000 | 2.583899000  |
| 6  | 2.818633000  | -1.179186000 | 1.694439000  |
| 6  | 1.671175000  | -1.788318000 | 2.510456000  |
| 1  | -2.715714000 | 0.165179000  | 2.244466000  |
| 1  | -1.650159000 | -1.504649000 | 3.670094000  |
| 1  | 3.746609000  | -1.760966000 | 1.754860000  |
| 1  | 1.823451000  | -1.597559000 | 3.581738000  |
| 1  | -0.366793000 | 2.907830000  | 2.426632000  |
| 1  | 1.298322000  | 1.021538000  | 2.540235000  |
| 6  | -0.970361000 | 3.635872000  | -0.635085000 |
| 1  | -0.305140000 | 4.507432000  | -0.710283000 |
| 6  | -2.632161000 | -2.535135000 | -0.468173000 |
| 1  | -1.860090000 | -3.037500000 | 0.135887000  |
| 6  | 3.797119000  | 0.047409000  | -0.766941000 |
| 1  | 3.511757000  | 1.081175000  | -0.530731000 |
| 23 | 0.021928000  | -0.145393000 | -0.571178000 |
| 1  | -1.567925000 | 1.823555000  | 1.772047000  |
| 1  | -0.094121000 | 0.751859000  | 3.542783000  |
| 1  | 1.667797000  | -2.878512000 | 2.397063000  |
| 1  | 3.073976000  | -0.184274000 | 2.084020000  |
| 1  | -1.710157000 | -2.725939000 | 2.411581000  |
| 1  | -3.678768000 | -1.274538000 | 2.037517000  |
| 6  | 5.164736000  | -0.178186000 | -0.132052000 |
| 1  | 5.897532000  | 0.510413000  | -0.569694000 |
| 1  | 5.160645000  | 0.005461000  | 0.945827000  |
| 1  | 5.550532000  | -1.188251000 | -0.287206000 |
| 6  | 3.830268000  | -0.069690000 | -2.285435000 |
| 1  | 4.224893000  | -1.039311000 | -2.607968000 |
| 1  | 2.830922000  | 0.038971000  | -2.721764000 |
| 1  | 4.476726000  | 0.699222000  | -2.723201000 |
| 6  | -3.988489000 | -3.109171000 | -0.076126000 |
| 1  | -3.994919000 | -4.193101000 | -0.237982000 |
| 1  | -4.256336000 | -2.941418000 | 0.970300000  |
| 1  | -4.791411000 | -2.698961000 | -0.697188000 |

|    |              |              |              |
|----|--------------|--------------|--------------|
| 6  | -2.332268000 | -2.841136000 | -1.930901000 |
| 1  | -3.141600000 | -2.507494000 | -2.586533000 |
| 1  | -1.409113000 | -2.367885000 | -2.273650000 |
| 1  | -2.239615000 | -3.924669000 | -2.069760000 |
| 6  | -1.409979000 | 3.252481000  | -2.043843000 |
| 1  | -0.562423000 | 3.004800000  | -2.689661000 |
| 1  | -2.058016000 | 2.369663000  | -2.032185000 |
| 1  | -1.966068000 | 4.069791000  | -2.516788000 |
| 6  | -2.154865000 | 4.032215000  | 0.234195000  |
| 1  | -1.853811000 | 4.376660000  | 1.227693000  |
| 1  | -2.718733000 | 4.843888000  | -0.238150000 |
| 1  | -2.856757000 | 3.202577000  | 0.373833000  |
| 6  | 2.455331000  | -2.594426000 | -0.893996000 |
| 1  | 2.360890000  | -2.330805000 | -1.956931000 |
| 6  | 1.278100000  | -3.507026000 | -0.564034000 |
| 1  | 1.258852000  | -3.798480000 | 0.491391000  |
| 1  | 0.325991000  | -3.031151000 | -0.802033000 |
| 1  | 1.352377000  | -4.430582000 | -1.150930000 |
| 6  | 3.773139000  | -3.323340000 | -0.670019000 |
| 1  | 3.750846000  | -4.300933000 | -1.165125000 |
| 1  | 4.634229000  | -2.785591000 | -1.071225000 |
| 1  | 3.966468000  | -3.515491000 | 0.391514000  |
| 6  | -3.769592000 | 0.297581000  | -0.572877000 |
| 1  | -3.379329000 | 1.312158000  | -0.394886000 |
| 6  | -5.093296000 | 0.187526000  | 0.173504000  |
| 1  | -5.535388000 | -0.809484000 | 0.100073000  |
| 1  | -4.998280000 | 0.426304000  | 1.236023000  |
| 1  | -5.822504000 | 0.889903000  | -0.247689000 |
| 6  | -3.951505000 | 0.141584000  | -2.077433000 |
| 1  | -4.480530000 | -0.786031000 | -2.318709000 |
| 1  | -4.549608000 | 0.963852000  | -2.485853000 |
| 1  | -2.995539000 | 0.123366000  | -2.612139000 |
| 6  | 1.739528000  | 3.094243000  | 0.294498000  |
| 1  | 2.362630000  | 2.311382000  | 0.754088000  |
| 6  | 1.748303000  | 4.312222000  | 1.205930000  |
| 1  | 2.749488000  | 4.755231000  | 1.251096000  |
| 1  | 1.073233000  | 5.098474000  | 0.849347000  |
| 1  | 1.459185000  | 4.070465000  | 2.232158000  |
| 6  | 2.307591000  | 3.412149000  | -1.084558000 |
| 1  | 3.355179000  | 3.725706000  | -1.018946000 |
| 1  | 2.256501000  | 2.552044000  | -1.760667000 |
| 1  | 1.761651000  | 4.233373000  | -1.562967000 |
| 15 | -2.335625000 | -0.749354000 | 0.035668000  |
| 15 | 0.081584000  | 2.262086000  | 0.091627000  |
| 15 | 2.332730000  | -0.910172000 | -0.080155000 |
| 14 | 0.058036000  | -1.037583000 | 1.818316000  |

7 0.078863000 -0.684829000 -2.069471000

[1c'<sub>PB</sub>]≡N (TE = -2994.083858)

|    |              |              |              |
|----|--------------|--------------|--------------|
| 6  | -0.615954000 | 1.951994000  | 1.842006000  |
| 6  | 0.220880000  | 0.893325000  | 2.577638000  |
| 6  | -2.382260000 | -1.053848000 | 1.956457000  |
| 6  | -1.081550000 | -1.560278000 | 2.571382000  |
| 6  | 2.791253000  | -0.831488000 | 1.721409000  |
| 6  | 1.634497000  | -1.398566000 | 2.545093000  |
| 1  | -2.618258000 | -0.049192000 | 2.327355000  |
| 1  | -1.215365000 | -1.619799000 | 3.668613000  |
| 1  | 3.741580000  | -1.341919000 | 1.919042000  |
| 1  | 1.887943000  | -1.299705000 | 3.617241000  |
| 1  | -0.613241000 | 2.898002000  | 2.398125000  |
| 1  | 1.255084000  | 1.265125000  | 2.618277000  |
| 6  | -1.099058000 | 3.559897000  | -0.636079000 |
| 1  | -0.443026000 | 4.436627000  | -0.731047000 |
| 6  | -2.507915000 | -2.712383000 | -0.406736000 |
| 1  | -1.715482000 | -3.221396000 | 0.165389000  |
| 6  | 3.763001000  | 0.006296000  | -0.899754000 |
| 1  | 3.676639000  | 1.020229000  | -0.477672000 |
| 23 | 0.042192000  | -0.150993000 | -0.655509000 |
| 1  | -1.668465000 | 1.659368000  | 1.764966000  |
| 1  | -0.098489000 | 0.925634000  | 3.637649000  |
| 1  | 1.566717000  | -2.483203000 | 2.380033000  |
| 1  | 2.963929000  | 0.226542000  | 1.962028000  |
| 1  | -0.914879000 | -2.605222000 | 2.269723000  |
| 1  | -3.246895000 | -1.673544000 | 2.225617000  |
| 6  | 5.160795000  | -0.516468000 | -0.596831000 |
| 1  | 5.919076000  | 0.158559000  | -1.010267000 |
| 1  | 5.362918000  | -0.611525000 | 0.474230000  |
| 1  | 5.330390000  | -1.494665000 | -1.058289000 |
| 6  | 3.526736000  | 0.096767000  | -2.402318000 |
| 1  | 3.676264000  | -0.874829000 | -2.886900000 |
| 1  | 2.508311000  | 0.413992000  | -2.643240000 |
| 1  | 4.233517000  | 0.794350000  | -2.865655000 |
| 6  | -3.846521000 | -3.318686000 | -0.005056000 |
| 1  | -3.833405000 | -4.402434000 | -0.167519000 |
| 1  | -4.107787000 | -3.154861000 | 1.044075000  |
| 1  | -4.662654000 | -2.922455000 | -0.617678000 |
| 6  | -2.233411000 | -2.954828000 | -1.887846000 |
| 1  | -3.080503000 | -2.644454000 | -2.506460000 |
| 1  | -1.356016000 | -2.410110000 | -2.245655000 |
| 1  | -2.080293000 | -4.024028000 | -2.073624000 |
| 6  | -1.543863000 | 3.147393000  | -2.034298000 |
| 1  | -0.701507000 | 2.867567000  | -2.673305000 |

|    |              |              |              |
|----|--------------|--------------|--------------|
| 1  | -2.204971000 | 2.275148000  | -1.998527000 |
| 1  | -2.089361000 | 3.960574000  | -2.526436000 |
| 6  | -2.284812000 | 3.961565000  | 0.229644000  |
| 1  | -1.986051000 | 4.339510000  | 1.211336000  |
| 1  | -2.863408000 | 4.750873000  | -0.262505000 |
| 1  | -2.973228000 | 3.125370000  | 0.395499000  |
| 6  | 2.606359000  | -2.689551000 | -0.552153000 |
| 1  | 3.001579000  | -2.623152000 | -1.577022000 |
| 6  | 1.278619000  | -3.436798000 | -0.616987000 |
| 1  | 0.800726000  | -3.489332000 | 0.369068000  |
| 1  | 0.576369000  | -2.947461000 | -1.296531000 |
| 1  | 1.429791000  | -4.466160000 | -0.963769000 |
| 6  | 3.603629000  | -3.452590000 | 0.311742000  |
| 1  | 3.784410000  | -4.447828000 | -0.110006000 |
| 1  | 4.573267000  | -2.959154000 | 0.404217000  |
| 1  | 3.218087000  | -3.605845000 | 1.325228000  |
| 6  | -3.700253000 | 0.088440000  | -0.377591000 |
| 1  | -3.327480000 | 1.105206000  | -0.171989000 |
| 6  | -4.978601000 | -0.098706000 | 0.430126000  |
| 1  | -5.426532000 | -1.083992000 | 0.280180000  |
| 1  | -4.821802000 | 0.029857000  | 1.504422000  |
| 1  | -5.728646000 | 0.640338000  | 0.124689000  |
| 6  | -3.953748000 | -0.009283000 | -1.876731000 |
| 1  | -4.460759000 | -0.945536000 | -2.132160000 |
| 1  | -4.602254000 | 0.805529000  | -2.217432000 |
| 1  | -3.025336000 | 0.032318000  | -2.456740000 |
| 6  | 1.608764000  | 3.094325000  | 0.347156000  |
| 1  | 2.246981000  | 2.324887000  | 0.808913000  |
| 6  | 1.563204000  | 4.305194000  | 1.266825000  |
| 1  | 2.549321000  | 4.777749000  | 1.337907000  |
| 1  | 0.872917000  | 5.073183000  | 0.899116000  |
| 1  | 1.256886000  | 4.047689000  | 2.284468000  |
| 6  | 2.196349000  | 3.436182000  | -1.017174000 |
| 1  | 3.229094000  | 3.789462000  | -0.924330000 |
| 1  | 2.196408000  | 2.574102000  | -1.691978000 |
| 1  | 1.632303000  | 4.235807000  | -1.510792000 |
| 15 | -2.217587000 | -0.937946000 | 0.118528000  |
| 15 | -0.023393000 | 2.215888000  | 0.113384000  |
| 15 | 2.351770000  | -0.890530000 | -0.067181000 |
| 5  | 0.224949000  | -0.695729000 | 2.312020000  |
| 7  | 0.037390000  | -0.436992000 | -2.216255000 |

[1d'<sub>sc</sub>]=N (TE = -2822.468249)

|   |              |              |             |
|---|--------------|--------------|-------------|
| 6 | -0.048784000 | -1.374065000 | 1.836368000 |
| 6 | -0.410109000 | 0.050048000  | 2.276705000 |
| 6 | 2.473607000  | 0.797314000  | 1.682782000 |

|    |              |              |              |
|----|--------------|--------------|--------------|
| 6  | 1.347490000  | 1.803677000  | 1.793888000  |
| 6  | -2.430013000 | 2.028020000  | 1.031442000  |
| 6  | -1.045053000 | 2.367382000  | 1.551605000  |
| 1  | 2.379836000  | 0.004700000  | 2.432505000  |
| 1  | 1.344491000  | 2.166902000  | 2.844093000  |
| 1  | -3.106071000 | 2.887598000  | 1.063592000  |
| 1  | -1.164776000 | 2.673274000  | 2.611941000  |
| 1  | -0.387548000 | -2.092594000 | 2.589985000  |
| 1  | -1.497124000 | 0.048172000  | 2.436007000  |
| 6  | -0.157348000 | -3.440160000 | -0.189493000 |
| 1  | -0.803526000 | -3.731204000 | -1.027823000 |
| 6  | 3.547126000  | 0.989008000  | -1.001055000 |
| 1  | 3.049682000  | 1.965090000  | -1.016701000 |
| 6  | -3.646858000 | 0.147764000  | -0.699730000 |
| 1  | -3.428762000 | -0.512984000 | 0.149096000  |
| 23 | 0.082179000  | 0.595005000  | -0.690119000 |
| 16 | 2.476471000  | -0.080836000 | 0.067603000  |
| 16 | -0.883473000 | -1.800518000 | 0.255930000  |
| 16 | -2.313979000 | 1.428555000  | -0.704228000 |
| 6  | -0.015034000 | 1.250094000  | 1.386049000  |
| 1  | 1.026925000  | -1.525509000 | 1.703483000  |
| 1  | 0.010453000  | 0.167075000  | 3.294840000  |
| 1  | -0.681485000 | 3.264225000  | 1.032406000  |
| 1  | -2.899003000 | 1.223607000  | 1.609655000  |
| 1  | 1.581058000  | 2.680827000  | 1.175509000  |
| 1  | 3.463023000  | 1.238045000  | 1.830730000  |
| 6  | -5.007224000 | 0.793212000  | -0.522844000 |
| 1  | -5.793027000 | 0.029736000  | -0.503803000 |
| 1  | -5.079989000 | 1.358030000  | 0.410534000  |
| 1  | -5.230797000 | 1.479769000  | -1.345335000 |
| 6  | -3.539131000 | -0.635974000 | -1.992716000 |
| 1  | -3.708368000 | 0.004103000  | -2.864566000 |
| 1  | -2.554432000 | -1.099855000 | -2.108332000 |
| 1  | -4.288540000 | -1.433498000 | -2.019814000 |
| 6  | 4.960396000  | 1.078191000  | -0.463755000 |
| 1  | 5.564287000  | 1.713712000  | -1.120342000 |
| 1  | 5.015636000  | 1.515624000  | 0.536020000  |
| 1  | 5.439206000  | 0.094216000  | -0.427048000 |
| 6  | 3.504138000  | 0.386401000  | -2.392243000 |
| 1  | 3.899931000  | -0.635954000 | -2.400165000 |
| 1  | 2.484745000  | 0.383060000  | -2.783955000 |
| 1  | 4.119606000  | 0.981648000  | -3.074165000 |
| 6  | 1.276213000  | -3.343136000 | -0.672341000 |
| 1  | 1.385453000  | -2.636995000 | -1.500204000 |
| 1  | 1.953388000  | -3.019649000 | 0.123193000  |
| 1  | 1.624100000  | -4.323628000 | -1.016490000 |

|   |              |              |              |
|---|--------------|--------------|--------------|
| 6 | -0.325885000 | -4.442433000 | 0.937102000  |
| 1 | -1.357852000 | -4.496255000 | 1.292271000  |
| 1 | -0.034174000 | -5.442090000 | 0.598745000  |
| 1 | 0.313467000  | -4.197703000 | 1.790780000  |
| 7 | 0.586367000  | 1.728017000  | -1.674765000 |

[1e'<sub>ssi</sub>]=N (TE = -3073.881319)

|    |              |              |              |
|----|--------------|--------------|--------------|
| 23 | 0.194961000  | 0.267886000  | -0.739056000 |
| 16 | 2.667418000  | -0.651079000 | -0.587542000 |
| 16 | -0.611005000 | -2.246119000 | -0.898237000 |
| 16 | -1.924046000 | 0.987460000  | 0.401229000  |
| 14 | 0.617562000  | 0.101567000  | 1.707746000  |
| 6  | -0.528274000 | 1.211674000  | 2.770867000  |
| 6  | -1.350901000 | 2.055362000  | 1.800202000  |
| 6  | 0.092766000  | -2.696899000 | 0.741805000  |
| 6  | -0.095252000 | -1.703512000 | 1.891073000  |
| 6  | 2.452930000  | -0.029656000 | 2.198356000  |
| 6  | 3.100949000  | -0.963468000 | 1.186453000  |
| 1  | 2.785635000  | -1.997769000 | 1.353305000  |
| 1  | 4.193950000  | -0.979453000 | 1.227759000  |
| 1  | 2.927162000  | 0.959609000  | 2.163567000  |
| 1  | 2.636052000  | -0.427290000 | 3.206329000  |
| 1  | -0.317829000 | -3.684305000 | 0.981709000  |
| 1  | 1.147155000  | -2.872780000 | 0.510404000  |
| 1  | -1.171257000 | -1.598383000 | 2.092486000  |
| 1  | 0.308055000  | -2.188679000 | 2.795221000  |
| 1  | -1.189767000 | 0.616663000  | 3.413339000  |
| 1  | 0.026263000  | 1.884099000  | 3.435758000  |
| 1  | -0.734090000 | 2.841829000  | 1.355239000  |
| 1  | -2.235560000 | 2.516766000  | 2.255864000  |
| 6  | 3.565483000  | 0.944734000  | -0.933189000 |
| 1  | 2.931676000  | 1.726764000  | -0.500908000 |
| 6  | -2.430042000 | -2.309580000 | -0.553181000 |
| 1  | -2.592085000 | -1.680220000 | 0.328400000  |
| 6  | -2.924981000 | 2.175946000  | -0.615918000 |
| 1  | -3.024720000 | 1.618025000  | -1.555453000 |
| 6  | -2.886437000 | -3.727927000 | -0.279756000 |
| 1  | -3.963142000 | -3.744143000 | -0.078664000 |
| 1  | -2.699066000 | -4.382296000 | -1.136634000 |
| 1  | -2.393303000 | -4.166532000 | 0.591605000  |
| 6  | -3.134889000 | -1.689337000 | -1.743745000 |
| 1  | -2.770424000 | -0.677982000 | -1.951277000 |
| 1  | -2.993680000 | -2.284865000 | -2.651627000 |
| 1  | -4.211477000 | -1.625632000 | -1.555815000 |

|   |              |             |              |
|---|--------------|-------------|--------------|
| 6 | -4.294896000 | 2.382282000 | 0.002035000  |
| 1 | -4.227518000 | 2.876140000 | 0.976903000  |
| 1 | -4.909104000 | 3.024262000 | -0.639240000 |
| 1 | -4.828693000 | 1.438611000 | 0.142851000  |
| 6 | -2.181039000 | 3.465633000 | -0.887590000 |
| 1 | -2.713565000 | 4.045677000 | -1.649029000 |
| 1 | -2.122006000 | 4.093671000 | 0.007083000  |
| 1 | -1.168288000 | 3.268156000 | -1.250792000 |
| 6 | 3.603341000  | 1.104509000 | -2.440316000 |
| 1 | 4.056657000  | 2.067874000 | -2.695147000 |
| 1 | 4.203641000  | 0.318407000 | -2.910751000 |
| 1 | 2.597179000  | 1.094841000 | -2.862744000 |
| 6 | 4.952061000  | 0.962543000 | -0.324499000 |
| 1 | 5.472129000  | 1.870766000 | -0.646612000 |
| 1 | 4.944089000  | 0.973486000 | 0.768029000  |
| 1 | 5.555314000  | 0.109759000 | -0.654351000 |
| 7 | 0.512553000  | 1.549088000 | -1.614247000 |

[ $\mathbf{1f}_{SB}$ ]≡N (TE = -2809.229728)

|    |              |              |              |
|----|--------------|--------------|--------------|
| 6  | -0.107109000 | -1.380326000 | 1.934339000  |
| 6  | -0.401912000 | 0.077080000  | 2.322904000  |
| 6  | 2.661849000  | 0.638807000  | 1.660381000  |
| 6  | 1.704306000  | 1.797503000  | 1.837256000  |
| 6  | -2.249962000 | 2.290855000  | 1.030715000  |
| 6  | -0.864746000 | 2.645983000  | 1.540140000  |
| 1  | 2.441206000  | -0.174335000 | 2.360593000  |
| 1  | 1.827800000  | 2.177093000  | 2.869912000  |
| 1  | -2.914212000 | 3.155909000  | 0.934485000  |
| 1  | -0.989625000 | 3.076965000  | 2.551335000  |
| 1  | -0.455232000 | -2.066880000 | 2.713088000  |
| 1  | -1.493618000 | 0.145399000  | 2.435131000  |
| 6  | -0.258823000 | -3.450863000 | -0.112374000 |
| 1  | -0.919206000 | -3.724736000 | -0.944851000 |
| 6  | 3.252918000  | 1.137308000  | -1.126194000 |
| 1  | 2.470542000  | 1.893770000  | -1.264684000 |
| 6  | -3.604055000 | 0.439811000  | -0.661633000 |
| 1  | -3.516141000 | -0.220403000 | 0.211965000  |
| 23 | 0.045101000  | 0.206743000  | -0.656433000 |
| 16 | 2.513694000  | -0.145520000 | 0.008410000  |
| 16 | -0.998230000 | -1.824273000 | 0.384953000  |
| 16 | -2.093251000 | 1.512284000  | -0.624522000 |
| 1  | 0.956497000  | -1.581277000 | 1.771669000  |
| 1  | -0.029805000 | 0.167445000  | 3.360513000  |
| 1  | -0.459655000 | 3.474386000  | 0.941861000  |
| 1  | -2.751026000 | 1.566149000  | 1.682693000  |
| 1  | 2.016404000  | 2.637437000  | 1.199028000  |

|   |              |              |              |
|---|--------------|--------------|--------------|
| 1 | 3.717977000  | 0.883417000  | 1.811038000  |
| 6 | -4.862815000 | 1.277589000  | -0.558711000 |
| 1 | -5.748853000 | 0.633598000  | -0.584413000 |
| 1 | -4.907565000 | 1.853821000  | 0.369033000  |
| 1 | -4.940786000 | 1.980388000  | -1.394101000 |
| 6 | -3.551818000 | -0.382186000 | -1.933713000 |
| 1 | -3.611671000 | 0.254939000  | -2.821619000 |
| 1 | -2.626980000 | -0.960529000 | -2.011591000 |
| 1 | -4.395252000 | -1.079329000 | -1.967669000 |
| 6 | 4.502327000  | 1.760871000  | -0.541199000 |
| 1 | 4.955032000  | 2.424951000  | -1.284913000 |
| 1 | 4.305128000  | 2.365053000  | 0.347396000  |
| 1 | 5.251379000  | 1.004800000  | -0.282240000 |
| 6 | 3.518672000  | 0.440090000  | -2.445700000 |
| 1 | 4.287801000  | -0.332119000 | -2.337536000 |
| 1 | 2.606695000  | -0.011959000 | -2.841721000 |
| 1 | 3.876732000  | 1.166990000  | -3.181863000 |
| 6 | 1.162776000  | -3.331926000 | -0.617299000 |
| 1 | 1.250083000  | -2.600218000 | -1.424909000 |
| 1 | 1.854627000  | -3.035503000 | 0.176870000  |
| 1 | 1.503675000  | -4.302197000 | -0.995191000 |
| 6 | -0.409393000 | -4.463474000 | 1.006759000  |
| 1 | -1.437385000 | -4.531355000 | 1.371372000  |
| 1 | -0.112192000 | -5.456972000 | 0.656057000  |
| 1 | 0.235907000  | -4.220320000 | 1.856705000  |
| 5 | 0.169916000  | 1.428378000  | 1.599033000  |
| 7 | 0.308016000  | 0.268008000  | -2.213733000 |

[1a''<sub>pc</sub>]≡N (TE = -3464.580826)

|   |              |              |             |
|---|--------------|--------------|-------------|
| 6 | -0.394435000 | -1.375701000 | 1.628544000 |
| 6 | 0.343821000  | -2.095400000 | 2.599100000 |
| 1 | 1.182375000  | -1.597460000 | 3.083188000 |
| 6 | 0.012758000  | -3.383623000 | 2.978649000 |
| 1 | 0.603634000  | -3.885554000 | 3.743541000 |
| 6 | -1.089686000 | -4.029448000 | 2.412561000 |
| 1 | -1.364075000 | -5.035804000 | 2.719092000 |
| 6 | -1.811864000 | -3.372584000 | 1.426506000 |
| 1 | -2.630128000 | -3.900067000 | 0.938236000 |
| 6 | -1.476882000 | -2.079796000 | 1.000106000 |
| 6 | 1.231179000  | 0.547311000  | 1.763530000 |
| 6 | 1.311789000  | 1.469747000  | 2.826552000 |
| 1 | 0.391277000  | 1.787903000  | 3.311947000 |
| 6 | 2.518916000  | 1.982050000  | 3.278042000 |
| 1 | 2.528328000  | 2.691383000  | 4.103932000 |
| 6 | 3.713373000  | 1.580011000  | 2.686969000 |
| 1 | 4.667176000  | 1.970554000  | 3.033890000 |



|    |              |              |              |
|----|--------------|--------------|--------------|
| 6  | 3.668988000  | 0.682810000  | 1.627008000  |
| 1  | 4.601596000  | 0.404178000  | 1.145854000  |
| 6  | 2.456836000  | 0.177257000  | 1.142523000  |
| 6  | -1.179263000 | 0.998960000  | 1.548839000  |
| 6  | -2.031043000 | 0.885242000  | 2.659810000  |
| 1  | -1.960714000 | -0.008054000 | 3.280361000  |
| 6  | -2.922431000 | 1.891957000  | 3.001001000  |
| 1  | -3.555610000 | 1.780784000  | 3.879733000  |
| 6  | -2.992316000 | 3.054208000  | 2.234282000  |
| 1  | -3.680571000 | 3.852447000  | 2.502970000  |
| 6  | -2.176733000 | 3.183741000  | 1.115580000  |
| 1  | -2.245447000 | 4.086729000  | 0.514069000  |
| 6  | -1.285135000 | 2.168421000  | 0.751723000  |
| 6  | -0.083647000 | 0.020913000  | 1.308184000  |
| 23 | 0.007982000  | -0.241907000 | -1.287002000 |
| 6  | -2.111132000 | -2.939292000 | -1.684125000 |
| 1  | -2.712131000 | -3.730184000 | -1.216723000 |
| 6  | 3.828138000  | -0.108961000 | -1.449037000 |
| 1  | 3.866415000  | 0.956334000  | -1.171652000 |
| 6  | -1.298386000 | 2.991762000  | -2.137800000 |
| 1  | -0.701034000 | 2.709419000  | -3.017810000 |
| 6  | -1.442744000 | 4.508606000  | -2.131642000 |
| 1  | -1.969565000 | 4.831174000  | -3.037301000 |
| 1  | -2.027217000 | 4.879092000  | -1.285055000 |
| 1  | -0.483913000 | 5.030158000  | -2.122089000 |
| 6  | -2.653723000 | 2.307144000  | -2.277596000 |
| 1  | -3.306343000 | 2.527111000  | -1.425150000 |
| 1  | -3.167502000 | 2.655407000  | -3.179964000 |
| 1  | -2.548538000 | 1.219660000  | -2.354050000 |
| 6  | -2.695085000 | -2.591066000 | -3.047770000 |
| 1  | -3.758856000 | -2.340864000 | -3.002361000 |
| 1  | -2.163053000 | -1.741239000 | -3.491016000 |
| 1  | -2.592725000 | -3.436398000 | -3.736565000 |
| 6  | -0.676995000 | -3.430321000 | -1.821839000 |
| 1  | -0.232873000 | -3.705393000 | -0.860599000 |
| 1  | -0.619003000 | -4.308664000 | -2.474211000 |
| 1  | -0.051187000 | -2.658832000 | -2.294445000 |
| 6  | 5.194854000  | -0.727976000 | -1.165775000 |
| 1  | 5.964713000  | -0.192187000 | -1.732372000 |
| 1  | 5.494185000  | -0.704092000 | -0.116855000 |
| 1  | 5.241122000  | -1.770600000 | -1.490535000 |
| 6  | 3.520676000  | -0.196336000 | -2.942340000 |
| 1  | 3.523548000  | -1.234751000 | -3.290193000 |
| 1  | 2.541475000  | 0.217725000  | -3.194083000 |
| 1  | 4.287130000  | 0.335280000  | -3.517281000 |
| 15 | -0.321225000 | 2.143369000  | -0.793748000 |

|    |              |              |              |
|----|--------------|--------------|--------------|
| 15 | 2.356272000  | -0.701350000 | -0.453237000 |
| 15 | -2.129238000 | -1.430015000 | -0.579811000 |
| 6  | 2.563066000  | -2.530549000 | -0.103528000 |
| 1  | 1.568294000  | -2.798541000 | 0.281684000  |
| 6  | 2.793802000  | -3.324216000 | -1.385400000 |
| 1  | 3.815974000  | -3.213953000 | -1.757620000 |
| 1  | 2.634888000  | -4.393146000 | -1.206022000 |
| 1  | 2.120987000  | -3.026070000 | -2.194073000 |
| 6  | 3.572053000  | -2.875035000 | 0.982423000  |
| 1  | 3.503205000  | -3.939192000 | 1.235886000  |
| 1  | 4.602020000  | -2.685539000 | 0.667759000  |
| 1  | 3.395530000  | -2.308744000 | 1.901014000  |
| 6  | -3.957172000 | -1.039486000 | -0.512140000 |
| 1  | -4.162264000 | -0.711082000 | -1.541885000 |
| 6  | -4.289625000 | 0.104271000  | 0.428343000  |
| 1  | -4.161949000 | -0.195509000 | 1.471523000  |
| 1  | -3.666988000 | 0.985923000  | 0.264241000  |
| 1  | -5.336094000 | 0.402853000  | 0.301166000  |
| 6  | -4.826534000 | -2.250314000 | -0.198256000 |
| 1  | -5.884088000 | -1.964275000 | -0.212779000 |
| 1  | -4.707529000 | -3.070678000 | -0.910077000 |
| 1  | -4.618631000 | -2.639049000 | 0.804139000  |
| 6  | 1.227086000  | 3.150901000  | -0.524729000 |
| 1  | 1.846739000  | 2.466109000  | 0.068363000  |
| 6  | 1.054531000  | 4.421521000  | 0.295309000  |
| 1  | 2.031740000  | 4.874741000  | 0.498625000  |
| 1  | 0.448404000  | 5.177609000  | -0.211140000 |
| 1  | 0.585942000  | 4.215979000  | 1.262045000  |
| 6  | 1.939645000  | 3.374177000  | -1.854171000 |
| 1  | 2.951195000  | 3.761208000  | -1.688745000 |
| 1  | 2.028352000  | 2.445616000  | -2.429129000 |
| 1  | 1.421378000  | 4.099031000  | -2.489504000 |
| 7  | 0.049943000  | -0.098585000 | -2.873655000 |

[1b''<sub>psi</sub>]≡N (TE = -3715.981210)

|   |             |              |             |
|---|-------------|--------------|-------------|
| 6 | 1.718602000 | -2.103565000 | 0.954587000 |
| 6 | 1.980060000 | -3.187256000 | 1.800142000 |
| 1 | 1.158240000 | -3.667913000 | 2.331507000 |
| 6 | 3.278374000 | -3.647013000 | 1.995893000 |
| 1 | 3.467165000 | -4.492150000 | 2.655397000 |
| 6 | 4.340988000 | -3.000376000 | 1.370454000 |
| 1 | 5.362518000 | -3.332228000 | 1.544270000 |
| 6 | 4.096123000 | -1.938466000 | 0.505380000 |
| 1 | 4.937995000 | -1.457983000 | 0.009566000 |
| 6 | 2.789308000 | -1.509569000 | 0.254221000 |
| 6 | 0.569597000 | 0.388389000  | 1.944753000 |

|    |              |              |              |
|----|--------------|--------------|--------------|
| 6  | 1.235103000  | 0.044983000  | 3.134701000  |
| 1  | 1.473993000  | -1.001453000 | 3.325454000  |
| 6  | 1.627001000  | 0.986248000  | 4.079228000  |
| 1  | 2.141025000  | 0.668187000  | 4.984500000  |
| 6  | 1.365220000  | 2.332696000  | 3.855868000  |
| 1  | 1.668551000  | 3.085596000  | 4.580454000  |
| 6  | 0.708454000  | 2.709709000  | 2.692515000  |
| 1  | 0.504083000  | 3.765023000  | 2.528027000  |
| 6  | 0.309927000  | 1.766332000  | 1.734893000  |
| 6  | -1.473843000 | -1.762612000 | 1.505881000  |
| 6  | -1.660378000 | -2.279801000 | 2.793676000  |
| 1  | -0.795453000 | -2.489491000 | 3.423629000  |
| 6  | -2.934794000 | -2.495460000 | 3.307643000  |
| 1  | -3.059559000 | -2.892861000 | 4.313171000  |
| 6  | -4.052702000 | -2.175421000 | 2.541506000  |
| 1  | -5.052081000 | -2.319346000 | 2.947271000  |
| 6  | -3.893925000 | -1.670297000 | 1.255824000  |
| 1  | -4.777483000 | -1.420023000 | 0.673274000  |
| 6  | -2.615275000 | -1.474010000 | 0.726126000  |
| 23 | -0.123426000 | 0.345780000  | -1.258334000 |
| 6  | 3.800429000  | 0.994038000  | -0.790981000 |
| 1  | 4.723134000  | 0.464034000  | -1.074585000 |
| 6  | -2.147722000 | 3.014857000  | 0.943679000  |
| 1  | -1.849970000 | 3.845300000  | 1.601176000  |
| 6  | -2.209242000 | -2.475647000 | -1.959473000 |
| 1  | -2.532521000 | -2.158694000 | -2.962815000 |
| 6  | -3.149557000 | -3.553384000 | -1.430048000 |
| 1  | -3.193310000 | -4.390068000 | -2.136600000 |
| 1  | -2.782995000 | -3.954092000 | -0.479172000 |
| 1  | -4.172442000 | -3.215794000 | -1.261096000 |
| 6  | -0.805696000 | -3.052111000 | -2.078862000 |
| 1  | -0.411564000 | -3.357858000 | -1.102006000 |
| 1  | -0.824152000 | -3.948209000 | -2.710707000 |
| 1  | -0.110256000 | -2.333317000 | -2.512506000 |
| 6  | 3.649347000  | 2.226833000  | -1.674455000 |
| 1  | 3.585449000  | 2.004114000  | -2.739010000 |
| 1  | 2.746306000  | 2.783985000  | -1.409333000 |
| 1  | 4.499827000  | 2.902166000  | -1.528264000 |
| 6  | 3.899024000  | 1.430487000  | 0.667054000  |
| 1  | 4.056830000  | 0.600045000  | 1.358910000  |
| 1  | 4.727098000  | 2.136077000  | 0.797346000  |
| 1  | 2.984376000  | 1.945048000  | 0.984230000  |
| 6  | -3.071965000 | 3.544146000  | -0.144380000 |
| 1  | -3.952730000 | 4.024846000  | 0.295460000  |
| 1  | -2.595718000 | 4.278205000  | -0.800248000 |
| 1  | -3.431572000 | 2.731401000  | -0.781964000 |

|    |              |              |              |
|----|--------------|--------------|--------------|
| 6  | -2.851321000 | 1.962521000  | 1.787264000  |
| 1  | -3.157209000 | 1.103414000  | 1.183351000  |
| 1  | -2.225762000 | 1.578708000  | 2.598420000  |
| 1  | -3.759771000 | 2.378845000  | 2.236357000  |
| 14 | 0.139049000  | -1.104511000 | 0.752900000  |
| 15 | -0.549972000 | 2.361196000  | 0.219115000  |
| 15 | -2.266380000 | -0.865619000 | -0.977186000 |
| 15 | 2.381226000  | -0.215390000 | -1.020911000 |
| 6  | 2.767875000  | -1.145538000 | -2.615206000 |
| 1  | 1.870971000  | -1.770008000 | -2.717294000 |
| 6  | 3.991806000  | -2.049298000 | -2.597106000 |
| 1  | 4.119549000  | -2.506388000 | -3.584923000 |
| 1  | 4.914982000  | -1.494345000 | -2.391155000 |
| 1  | 3.920236000  | -2.860500000 | -1.871193000 |
| 6  | 2.821579000  | -0.220648000 | -3.825455000 |
| 1  | 2.014082000  | 0.514215000  | -3.822756000 |
| 1  | 3.786706000  | 0.293053000  | -3.889644000 |
| 1  | 2.719641000  | -0.811337000 | -4.742083000 |
| 6  | -3.840366000 | -0.036969000 | -1.599767000 |
| 1  | -4.147243000 | 0.593495000  | -0.750136000 |
| 6  | -3.459803000 | 0.873700000  | -2.765721000 |
| 1  | -3.141561000 | 0.290562000  | -3.636719000 |
| 1  | -4.316777000 | 1.484331000  | -3.072527000 |
| 1  | -2.624282000 | 1.537374000  | -2.528309000 |
| 6  | -5.026962000 | -0.901702000 | -2.012749000 |
| 1  | -4.770908000 | -1.571380000 | -2.839770000 |
| 1  | -5.436038000 | -1.515585000 | -1.208549000 |
| 1  | -5.841733000 | -0.261599000 | -2.370584000 |
| 6  | 0.359416000  | 3.916290000  | -0.324197000 |
| 1  | 1.397731000  | 3.699282000  | -0.030758000 |
| 6  | -0.047704000 | 5.244513000  | 0.303584000  |
| 1  | 0.613344000  | 6.040968000  | -0.055476000 |
| 1  | -1.065236000 | 5.535717000  | 0.027120000  |
| 1  | 0.007103000  | 5.256097000  | 1.394250000  |
| 6  | 0.299295000  | 4.014088000  | -1.847991000 |
| 1  | 0.605678000  | 3.084252000  | -2.338730000 |
| 1  | -0.716362000 | 4.236072000  | -2.195164000 |
| 1  | 0.946647000  | 4.819598000  | -2.212593000 |
| 7  | -0.141027000 | 0.175127000  | -2.840220000 |

$[1c''_{PB}] \equiv N (TE = -3451.334767)$

|   |              |              |             |
|---|--------------|--------------|-------------|
| 6 | -1.556328000 | -0.492088000 | 1.877752000 |
| 6 | -1.760872000 | -0.292245000 | 3.254854000 |
| 1 | -0.895092000 | -0.137852000 | 3.899837000 |
| 6 | -3.029890000 | -0.269127000 | 3.822590000 |
| 1 | -3.143717000 | -0.108597000 | 4.893260000 |

|    |              |              |              |
|----|--------------|--------------|--------------|
| 6  | -4.153369000 | -0.439204000 | 3.018995000  |
| 1  | -5.151293000 | -0.413160000 | 3.451702000  |
| 6  | -3.988188000 | -0.633874000 | 1.653405000  |
| 1  | -4.869288000 | -0.752228000 | 1.025042000  |
| 6  | -2.710817000 | -0.659987000 | 1.083559000  |
| 6  | 0.858485000  | -1.781998000 | 1.480472000  |
| 6  | 0.605868000  | -2.739482000 | 2.478049000  |
| 1  | -0.335624000 | -2.691660000 | 3.026301000  |
| 6  | 1.536748000  | -3.716415000 | 2.815419000  |
| 1  | 1.308304000  | -4.437261000 | 3.598820000  |
| 6  | 2.773428000  | -3.753293000 | 2.176884000  |
| 1  | 3.518666000  | -4.494459000 | 2.457496000  |
| 6  | 3.036700000  | -2.848272000 | 1.151426000  |
| 1  | 3.993099000  | -2.896909000 | 0.633464000  |
| 6  | 2.084318000  | -1.900663000 | 0.773035000  |
| 6  | 0.778120000  | 0.850651000  | 1.703677000  |
| 6  | 1.534223000  | 0.717874000  | 2.889422000  |
| 1  | 1.574387000  | -0.257169000 | 3.374624000  |
| 6  | 2.238479000  | 1.764648000  | 3.468365000  |
| 1  | 2.794312000  | 1.599901000  | 4.389792000  |
| 6  | 2.247076000  | 3.011704000  | 2.854786000  |
| 1  | 2.806064000  | 3.841420000  | 3.282162000  |
| 6  | 1.537762000  | 3.180279000  | 1.675311000  |
| 1  | 1.564851000  | 4.149617000  | 1.185089000  |
| 6  | 0.798637000  | 2.135495000  | 1.099316000  |
| 23 | -0.127858000 | -0.004502000 | -1.261265000 |
| 6  | -2.659919000 | -2.660888000 | -1.027954000 |
| 1  | -3.712935000 | -2.867601000 | -0.789445000 |
| 6  | 3.893111000  | -0.095050000 | -0.732339000 |
| 1  | 4.624122000  | -0.911169000 | -0.640643000 |
| 6  | -1.440047000 | 3.573465000  | -0.155461000 |
| 1  | -1.694421000 | 4.000193000  | -1.138687000 |
| 6  | -1.166428000 | 4.701662000  | 0.831871000  |
| 1  | -2.059126000 | 5.330724000  | 0.923613000  |
| 1  | -0.952938000 | 4.304005000  | 1.828526000  |
| 1  | -0.341136000 | 5.355645000  | 0.552726000  |
| 6  | -2.621221000 | 2.757818000  | 0.346280000  |
| 1  | -2.387336000 | 2.255914000  | 1.292261000  |
| 1  | -3.491986000 | 3.398269000  | 0.524420000  |
| 1  | -2.909918000 | 1.988877000  | -0.366988000 |
| 6  | -2.408305000 | -2.988343000 | -2.494944000 |
| 1  | -3.123452000 | -2.500465000 | -3.162929000 |
| 1  | -1.417054000 | -2.660675000 | -2.818428000 |
| 1  | -2.485436000 | -4.067732000 | -2.667154000 |
| 6  | -1.800322000 | -3.498424000 | -0.092465000 |
| 1  | -2.037785000 | -3.313894000 | 0.959189000  |

|    |              |              |              |
|----|--------------|--------------|--------------|
| 1  | -1.958725000 | -4.565106000 | -0.286776000 |
| 1  | -0.733398000 | -3.300365000 | -0.215887000 |
| 6  | 4.127091000  | 0.636813000  | -2.048484000 |
| 1  | 5.125557000  | 1.086707000  | -2.071126000 |
| 1  | 4.040482000  | -0.013218000 | -2.923741000 |
| 1  | 3.401293000  | 1.446171000  | -2.182605000 |
| 6  | 4.065302000  | 0.829788000  | 0.459179000  |
| 1  | 3.362086000  | 1.666990000  | 0.426969000  |
| 1  | 3.910073000  | 0.313414000  | 1.409987000  |
| 1  | 5.076033000  | 1.253088000  | 0.469784000  |
| 5  | -0.050984000 | -0.492554000 | 1.336469000  |
| 15 | -2.434178000 | -0.829554000 | -0.710766000 |
| 15 | 2.222213000  | -0.919001000 | -0.768306000 |
| 15 | -0.008856000 | 2.413899000  | -0.520761000 |
| 6  | 2.473579000  | -2.209627000 | -2.118985000 |
| 1  | 2.244334000  | -1.629047000 | -3.023478000 |
| 6  | 1.421643000  | -3.301399000 | -2.000000000 |
| 1  | 1.474220000  | -3.980997000 | -2.857661000 |
| 1  | 1.558519000  | -3.902198000 | -1.093590000 |
| 1  | 0.415769000  | -2.880052000 | -1.983013000 |
| 6  | 3.859409000  | -2.825056000 | -2.256459000 |
| 1  | 3.871981000  | -3.497475000 | -3.121806000 |
| 1  | 4.655333000  | -2.093943000 | -2.415730000 |
| 1  | 4.131267000  | -3.434523000 | -1.389611000 |
| 6  | -3.954991000 | -0.070312000 | -1.529766000 |
| 1  | -4.274288000 | 0.694299000  | -0.809905000 |
| 6  | -5.148856000 | -0.991520000 | -1.755461000 |
| 1  | -5.996672000 | -0.408701000 | -2.132505000 |
| 1  | -4.946105000 | -1.765995000 | -2.499839000 |
| 1  | -5.487019000 | -1.495416000 | -0.846179000 |
| 6  | -3.549232000 | 0.627990000  | -2.823592000 |
| 1  | -4.404941000 | 1.147615000  | -3.269305000 |
| 1  | -2.749150000 | 1.358577000  | -2.664114000 |
| 1  | -3.167318000 | -0.081414000 | -3.564487000 |
| 6  | 1.205195000  | 3.399314000  | -1.565897000 |
| 1  | 2.179652000  | 3.009702000  | -1.233955000 |
| 6  | 0.999946000  | 3.011330000  | -3.029198000 |
| 1  | 0.020257000  | 3.343147000  | -3.394610000 |
| 1  | 1.756223000  | 3.489345000  | -3.661780000 |
| 1  | 1.046456000  | 1.930773000  | -3.186763000 |
| 6  | 1.220990000  | 4.917763000  | -1.442251000 |
| 1  | 0.248592000  | 5.357714000  | -1.686409000 |
| 1  | 1.513337000  | 5.280328000  | -0.455124000 |
| 1  | 1.940323000  | 5.333962000  | -2.156208000 |
| 7  | -0.143634000 | -0.355275000 | -2.802669000 |

[1d''<sub>sc</sub>]≡N (TE = -3279.719386)

|    |              |              |              |
|----|--------------|--------------|--------------|
| 6  | -0.926914000 | -0.928346000 | 0.905836000  |
| 6  | -1.919396000 | -0.902546000 | 1.903962000  |
| 1  | -2.203884000 | 0.066188000  | 2.313384000  |
| 6  | -2.510098000 | -2.050337000 | 2.412239000  |
| 1  | -3.256270000 | -1.970373000 | 3.200388000  |
| 6  | -2.134742000 | -3.299743000 | 1.925425000  |
| 1  | -2.578581000 | -4.209764000 | 2.321491000  |
| 6  | -1.223955000 | -3.364891000 | 0.882061000  |
| 1  | -0.989016000 | -4.325137000 | 0.426835000  |
| 6  | -0.639189000 | -2.205023000 | 0.363620000  |
| 6  | 1.065459000  | 0.359704000  | 1.482227000  |
| 6  | 0.945588000  | 0.241600000  | 2.877906000  |
| 1  | -0.048790000 | 0.141113000  | 3.308568000  |
| 6  | 2.045414000  | 0.256548000  | 3.723521000  |
| 1  | 1.902861000  | 0.166699000  | 4.798467000  |
| 6  | 3.329051000  | 0.381148000  | 3.196444000  |
| 1  | 4.198643000  | 0.386136000  | 3.849469000  |
| 6  | 3.488763000  | 0.471671000  | 1.822476000  |
| 1  | 4.484533000  | 0.528403000  | 1.386432000  |
| 6  | 2.371811000  | 0.458429000  | 0.981831000  |
| 6  | -1.017628000 | 1.564604000  | 0.677199000  |
| 6  | -0.806736000 | 2.601494000  | 1.602936000  |
| 1  | 0.016385000  | 2.517264000  | 2.308335000  |
| 6  | -1.611596000 | 3.734208000  | 1.646927000  |
| 1  | -1.402296000 | 4.509757000  | 2.381461000  |
| 6  | -2.672716000 | 3.881105000  | 0.761766000  |
| 1  | -3.298074000 | 4.770128000  | 0.780788000  |
| 6  | -2.891936000 | 2.890099000  | -0.189049000 |
| 1  | -3.667725000 | 3.018738000  | -0.940624000 |
| 6  | -2.092034000 | 1.750573000  | -0.231648000 |
| 16 | -2.254745000 | 0.658469000  | -1.646109000 |
| 16 | 0.283114000  | -2.401709000 | -1.160800000 |
| 16 | 2.642737000  | 0.465729000  | -0.784176000 |
| 23 | 0.304231000  | 0.122985000  | -1.598439000 |
| 6  | 1.783867000  | -3.416642000 | -0.699100000 |
| 1  | 1.368136000  | -4.418394000 | -0.534574000 |
| 6  | 3.113777000  | 2.256369000  | -1.057015000 |
| 1  | 4.017578000  | 2.360155000  | -0.441750000 |
| 6  | -3.815991000 | -0.377593000 | -1.411236000 |
| 1  | -4.331474000 | -0.174158000 | -2.357038000 |
| 6  | -4.672102000 | 0.106841000  | -0.264163000 |
| 1  | -5.580377000 | -0.503539000 | -0.208915000 |
| 1  | -4.150448000 | 0.009134000  | 0.692064000  |
| 1  | -4.980738000 | 1.148283000  | -0.372212000 |
| 6  | -3.515194000 | -1.857786000 | -1.323633000 |

|   |              |              |              |
|---|--------------|--------------|--------------|
| 1 | -3.163569000 | -2.134167000 | -0.329429000 |
| 1 | -4.429831000 | -2.429986000 | -1.519456000 |
| 1 | -2.766274000 | -2.179152000 | -2.053332000 |
| 6 | 2.682320000  | -3.428168000 | -1.919138000 |
| 1 | 2.168331000  | -3.789841000 | -2.813544000 |
| 1 | 3.069532000  | -2.426248000 | -2.131400000 |
| 1 | 3.541498000  | -4.082759000 | -1.743173000 |
| 6 | 2.486270000  | -2.939237000 | 0.550073000  |
| 1 | 1.800151000  | -2.779271000 | 1.386715000  |
| 1 | 3.219235000  | -3.690955000 | 0.863704000  |
| 1 | 3.028665000  | -2.009090000 | 0.373057000  |
| 6 | 3.452401000  | 2.425182000  | -2.522045000 |
| 1 | 3.794804000  | 3.449186000  | -2.702846000 |
| 1 | 4.246671000  | 1.745865000  | -2.844478000 |
| 1 | 2.567363000  | 2.248679000  | -3.139497000 |
| 6 | 2.039725000  | 3.204186000  | -0.574550000 |
| 1 | 1.118606000  | 3.075266000  | -1.149593000 |
| 1 | 1.809647000  | 3.060962000  | 0.484694000  |
| 1 | 2.379629000  | 4.238351000  | -0.700831000 |
| 6 | -0.160720000 | 0.347678000  | 0.581662000  |
| 7 | 0.459863000  | 1.189612000  | -2.758702000 |

[1e''<sub>ssi</sub>]=N (TE = -3531.127160)

|   |              |              |              |
|---|--------------|--------------|--------------|
| 6 | -0.274461000 | 0.037813000  | 1.854350000  |
| 6 | -0.370064000 | 0.763585000  | 3.053362000  |
| 1 | -0.464238000 | 1.849174000  | 3.001472000  |
| 6 | -0.326522000 | 0.159679000  | 4.303115000  |
| 1 | -0.395912000 | 0.762370000  | 5.206156000  |
| 6 | -0.193482000 | -1.222979000 | 4.390464000  |
| 1 | -0.163605000 | -1.715858000 | 5.359730000  |
| 6 | -0.109934000 | -1.981141000 | 3.231606000  |
| 1 | -0.027751000 | -3.063645000 | 3.303545000  |
| 6 | -0.133048000 | -1.358304000 | 1.979167000  |
| 6 | 1.087307000  | 2.262450000  | 0.424788000  |
| 6 | 1.012704000  | 3.591623000  | 0.858397000  |
| 1 | 0.039954000  | 4.027462000  | 1.082223000  |
| 6 | 2.148242000  | 4.383494000  | 0.995280000  |
| 1 | 2.057283000  | 5.417860000  | 1.320055000  |
| 6 | 3.402202000  | 3.845522000  | 0.722539000  |
| 1 | 4.297682000  | 4.452753000  | 0.835622000  |
| 6 | 3.516519000  | 2.526030000  | 0.299466000  |
| 1 | 4.499879000  | 2.110468000  | 0.090911000  |
| 6 | 2.366836000  | 1.757371000  | 0.123755000  |
| 6 | -2.033302000 | 1.685626000  | -0.075769000 |
| 6 | -2.599041000 | 2.819008000  | 0.522480000  |
| 1 | -2.039040000 | 3.360075000  | 1.284333000  |



|    |              |              |              |
|----|--------------|--------------|--------------|
| 6  | -3.867852000 | 3.276234000  | 0.178248000  |
| 1  | -4.276615000 | 4.162133000  | 0.659938000  |
| 6  | -4.604577000 | 2.609029000  | -0.794387000 |
| 1  | -5.585599000 | 2.974925000  | -1.089119000 |
| 6  | -4.078746000 | 1.473684000  | -1.402089000 |
| 1  | -4.639735000 | 0.957669000  | -2.177731000 |
| 6  | -2.817826000 | 1.010241000  | -1.028117000 |
| 16 | -2.233805000 | -0.526332000 | -1.787551000 |
| 16 | -0.097224000 | -2.414626000 | 0.522897000  |
| 16 | 2.496731000  | 0.033569000  | -0.402134000 |
| 23 | 0.329664000  | -0.662340000 | -1.547664000 |
| 6  | 1.156406000  | -3.728778000 | 0.900635000  |
| 1  | 0.688536000  | -4.383356000 | 1.646106000  |
| 6  | 3.888547000  | 0.064446000  | -1.643892000 |
| 1  | 4.788722000  | 0.288115000  | -1.057926000 |
| 6  | -3.275004000 | -1.789535000 | -0.869066000 |
| 1  | -2.618995000 | -2.667221000 | -0.901520000 |
| 6  | -4.552531000 | -2.076985000 | -1.633033000 |
| 1  | -5.094847000 | -2.904181000 | -1.160670000 |
| 1  | -5.223047000 | -1.212124000 | -1.629346000 |
| 1  | -4.361910000 | -2.350479000 | -2.673241000 |
| 6  | -3.540188000 | -1.408439000 | 0.571889000  |
| 1  | -4.244400000 | -0.573603000 | 0.642023000  |
| 1  | -3.985396000 | -2.257829000 | 1.101298000  |
| 1  | -2.635223000 | -1.118624000 | 1.109366000  |
| 6  | 1.334209000  | -4.495537000 | -0.397297000 |
| 1  | 0.391277000  | -4.891950000 | -0.783516000 |
| 1  | 1.776502000  | -3.856732000 | -1.171377000 |
| 1  | 2.012551000  | -5.340497000 | -0.246820000 |
| 6  | 2.463507000  | -3.180438000 | 1.427302000  |
| 1  | 2.335884000  | -2.581423000 | 2.331639000  |
| 1  | 3.137990000  | -4.009120000 | 1.669557000  |
| 1  | 2.955704000  | -2.549454000 | 0.683312000  |
| 6  | 3.984162000  | -1.345254000 | -2.196378000 |
| 1  | 4.839355000  | -1.422080000 | -2.874844000 |
| 1  | 4.115857000  | -2.096603000 | -1.411170000 |
| 1  | 3.084688000  | -1.594188000 | -2.770145000 |
| 6  | 3.668878000  | 1.094412000  | -2.728218000 |
| 1  | 2.732277000  | 0.894617000  | -3.257042000 |
| 1  | 3.628648000  | 2.112520000  | -2.334263000 |
| 1  | 4.493261000  | 1.049691000  | -3.448898000 |
| 14 | -0.287933000 | 0.990860000  | 0.175930000  |
| 7  | 0.594311000  | -0.084000000 | -2.992769000 |

[ $\mathbf{1f}'_{SB}$ ] $\equiv$ N (TE = -3266.488000)

|   |              |             |             |
|---|--------------|-------------|-------------|
| 6 | -0.766815000 | 1.968619000 | 0.519001000 |
|---|--------------|-------------|-------------|

|    |              |              |              |
|----|--------------|--------------|--------------|
| 6  | -0.479397000 | 3.121869000  | 1.272516000  |
| 1  | 0.390339000  | 3.115430000  | 1.929266000  |
| 6  | -1.284420000 | 4.254926000  | 1.231051000  |
| 1  | -1.034496000 | 5.120142000  | 1.842270000  |
| 6  | -2.411718000 | 4.284397000  | 0.413707000  |
| 1  | -3.045459000 | 5.167385000  | 0.375653000  |
| 6  | -2.692767000 | 3.191220000  | -0.399650000 |
| 1  | -3.526495000 | 3.229763000  | -1.098755000 |
| 6  | -1.876989000 | 2.063419000  | -0.347670000 |
| 6  | -0.926964000 | -0.569373000 | 1.306843000  |
| 6  | -1.626933000 | -0.185771000 | 2.471223000  |
| 1  | -1.555173000 | 0.852143000  | 2.796843000  |
| 6  | -2.405197000 | -1.058532000 | 3.219563000  |
| 1  | -2.909557000 | -0.701694000 | 4.115491000  |
| 6  | -2.551930000 | -2.380507000 | 2.811860000  |
| 1  | -3.168983000 | -3.074811000 | 3.377337000  |
| 6  | -1.920770000 | -2.796154000 | 1.648831000  |
| 1  | -2.058854000 | -3.813245000 | 1.286706000  |
| 6  | -1.116126000 | -1.913759000 | 0.918809000  |
| 6  | 1.487067000  | 0.623192000  | 1.318988000  |
| 6  | 1.658978000  | 0.902334000  | 2.687540000  |
| 1  | 0.777956000  | 1.102999000  | 3.297459000  |
| 6  | 2.907779000  | 0.917686000  | 3.297129000  |
| 1  | 2.989968000  | 1.139960000  | 4.359368000  |
| 6  | 4.050088000  | 0.631847000  | 2.554417000  |
| 1  | 5.030490000  | 0.626939000  | 3.025095000  |
| 6  | 3.922884000  | 0.326557000  | 1.206594000  |
| 1  | 4.797847000  | 0.060443000  | 0.617089000  |
| 6  | 2.660910000  | 0.336511000  | 0.604753000  |
| 16 | 2.551651000  | -0.183819000 | -1.110169000 |
| 16 | -2.071487000 | 0.783914000  | -1.582704000 |
| 16 | -0.445715000 | -2.580636000 | -0.609404000 |
| 23 | 0.140861000  | -0.424702000 | -1.640632000 |
| 6  | -3.787308000 | 0.077706000  | -1.347121000 |
| 1  | -4.438496000 | 0.825884000  | -1.815548000 |
| 6  | 0.940996000  | -3.702672000 | -0.027061000 |
| 1  | 0.402795000  | -4.570854000 | 0.373489000  |
| 6  | 2.937172000  | 1.383825000  | -2.059452000 |
| 1  | 2.801583000  | 1.020582000  | -3.084684000 |
| 6  | 4.369696000  | 1.808046000  | -1.817680000 |
| 1  | 4.623595000  | 2.645406000  | -2.476050000 |
| 1  | 4.517024000  | 2.152483000  | -0.789091000 |
| 1  | 5.081468000  | 1.001855000  | -2.012879000 |
| 6  | 1.940935000  | 2.483223000  | -1.761212000 |
| 1  | 1.918860000  | 2.732538000  | -0.694828000 |
| 1  | 2.216592000  | 3.392779000  | -2.306206000 |

|   |              |              |              |
|---|--------------|--------------|--------------|
| 1 | 0.925973000  | 2.213343000  | -2.069169000 |
| 6 | -3.828524000 | -1.207239000 | -2.149610000 |
| 1 | -3.514369000 | -1.063600000 | -3.186771000 |
| 1 | -3.177864000 | -1.968607000 | -1.706523000 |
| 1 | -4.847298000 | -1.607411000 | -2.160290000 |
| 6 | -4.176729000 | -0.114293000 | 0.099659000  |
| 1 | -4.043625000 | 0.793916000  | 0.693327000  |
| 1 | -5.235317000 | -0.393171000 | 0.154626000  |
| 1 | -3.599281000 | -0.912865000 | 0.570034000  |
| 6 | 1.718961000  | -4.098352000 | -1.264856000 |
| 1 | 2.493028000  | -4.826185000 | -1.002112000 |
| 1 | 1.083193000  | -4.549935000 | -2.030803000 |
| 1 | 2.216230000  | -3.231060000 | -1.711218000 |
| 6 | 1.803797000  | -3.089001000 | 1.049495000  |
| 1 | 2.409594000  | -2.268025000 | 0.661204000  |
| 1 | 1.221901000  | -2.709350000 | 1.893652000  |
| 1 | 2.493916000  | -3.846232000 | 1.437733000  |
| 5 | 0.011035000  | 0.607541000  | 0.710057000  |
| 7 | 0.376671000  | -0.399456000 | -3.198147000 |

Cartesian coordinates of the vanadium hydrazine complexes for  $[1a'_{PC}]-[1f'_{SB}]$ ,  $[1a''_{PC}]-[1f''_{SB}]$  and  $\{[HIPTN_3N]-V\}$  along with their total energies (in hartree) including zero point vibrational correction at M06-L-D3(heptane)/6-311+G\* level of theory.

$[1a'_{PC}]-NH_2-NH_2$  (TE = -3064.380243)

|    |              |              |              |
|----|--------------|--------------|--------------|
| 6  | -0.043347000 | 2.536402000  | 1.893779000  |
| 6  | 0.570418000  | 1.299334000  | 2.537027000  |
| 6  | -2.607971000 | 0.068982000  | 1.692065000  |
| 6  | -1.425287000 | -0.220005000 | 2.618833000  |
| 6  | 2.257151000  | -1.243634000 | 1.927577000  |
| 6  | 0.871236000  | -1.160021000 | 2.563975000  |
| 1  | -2.682174000 | 1.141188000  | 1.463854000  |
| 1  | -1.559626000 | 0.371796000  | 3.545565000  |
| 1  | 2.838998000  | -2.093779000 | 2.311196000  |
| 1  | 1.000681000  | -1.095553000 | 3.666727000  |
| 1  | 0.352581000  | 3.470766000  | 2.313481000  |
| 1  | 1.656648000  | 1.331532000  | 2.357829000  |
| 6  | -0.823023000 | 3.831391000  | -0.640503000 |
| 1  | -0.198358000 | 4.272382000  | -1.433090000 |
| 6  | -2.644556000 | -2.567336000 | 0.486320000  |
| 1  | -1.891444000 | -2.711057000 | 1.278371000  |
| 6  | 3.709973000  | -0.495106000 | -0.494421000 |
| 1  | 3.474549000  | 0.563668000  | -0.306268000 |
| 23 | 0.006112000  | -0.027264000 | -0.297972000 |
| 6  | -0.009796000 | -0.024807000 | 2.024505000  |

|   |              |              |              |
|---|--------------|--------------|--------------|
| 1 | -1.126466000 | 2.556903000  | 2.069915000  |
| 1 | 0.463147000  | 1.385698000  | 3.639964000  |
| 1 | 0.355165000  | -2.115916000 | 2.395640000  |
| 1 | 2.843242000  | -0.348462000 | 2.171833000  |
| 1 | -1.532486000 | -1.263874000 | 2.954182000  |
| 1 | -3.563467000 | -0.213836000 | 2.156507000  |
| 6 | 5.006383000  | -0.796369000 | 0.250492000  |
| 1 | 5.769607000  | -0.051410000 | -0.005652000 |
| 1 | 4.882176000  | -0.764098000 | 1.336488000  |
| 1 | 5.426574000  | -1.771877000 | 0.000089000  |
| 6 | 3.866401000  | -0.665035000 | -1.999724000 |
| 1 | 4.113859000  | -1.698201000 | -2.269795000 |
| 1 | 2.944574000  | -0.404179000 | -2.534532000 |
| 1 | 4.666786000  | -0.030514000 | -2.397601000 |
| 6 | -4.008656000 | -2.918036000 | 1.064092000  |
| 1 | -4.016484000 | -3.945444000 | 1.448032000  |
| 1 | -4.301726000 | -2.264137000 | 1.890683000  |
| 1 | -4.795148000 | -2.863641000 | 0.303727000  |
| 6 | -2.275972000 | -3.507676000 | -0.658265000 |
| 1 | -3.067535000 | -3.566060000 | -1.410267000 |
| 1 | -1.362605000 | -3.191395000 | -1.173797000 |
| 1 | -2.114344000 | -4.526693000 | -0.287605000 |
| 6 | -2.087156000 | 3.281984000  | -1.287485000 |
| 1 | -1.868094000 | 2.519683000  | -2.042329000 |
| 1 | -2.738037000 | 2.810158000  | -0.540657000 |
| 1 | -2.669625000 | 4.076723000  | -1.768424000 |
| 6 | -1.187346000 | 4.927277000  | 0.354972000  |
| 1 | -0.322939000 | 5.351439000  | 0.869160000  |
| 1 | -1.705728000 | 5.752074000  | -0.148538000 |
| 1 | -1.868253000 | 4.550778000  | 1.125382000  |
| 6 | 2.298477000  | -3.130485000 | -0.315230000 |
| 1 | 2.063656000  | -3.197803000 | -1.390197000 |
| 6 | 1.231636000  | -3.908011000 | 0.447593000  |
| 1 | 1.487266000  | -3.981558000 | 1.510634000  |
| 1 | 0.248738000  | -3.433841000 | 0.380201000  |
| 1 | 1.141641000  | -4.931551000 | 0.066546000  |
| 6 | 3.663366000  | -3.765661000 | -0.088706000 |
| 1 | 3.608443000  | -4.852843000 | -0.224213000 |
| 1 | 4.423791000  | -3.398023000 | -0.780766000 |
| 1 | 4.030400000  | -3.592275000 | 0.929154000  |
| 6 | -3.773610000 | -0.173795000 | -0.979458000 |
| 1 | -3.387313000 | 0.779213000  | -1.368868000 |
| 6 | -5.070001000 | 0.136386000  | -0.241491000 |
| 1 | -5.508057000 | -0.750390000 | 0.224757000  |
| 1 | -4.931695000 | 0.882949000  | 0.545212000  |
| 1 | -5.819684000 | 0.535854000  | -0.935778000 |

|    |              |              |              |
|----|--------------|--------------|--------------|
| 6  | -4.016877000 | -1.083309000 | -2.178132000 |
| 1  | -4.525820000 | -2.007143000 | -1.884855000 |
| 1  | -4.661171000 | -0.591486000 | -2.916138000 |
| 1  | -3.089041000 | -1.371624000 | -2.684533000 |
| 6  | 1.959108000  | 3.123293000  | -0.124633000 |
| 1  | 2.549067000  | 2.456612000  | 0.524171000  |
| 6  | 2.187750000  | 4.558648000  | 0.323388000  |
| 1  | 3.251381000  | 4.819823000  | 0.266071000  |
| 1  | 1.655448000  | 5.272474000  | -0.315154000 |
| 1  | 1.871446000  | 4.735834000  | 1.355334000  |
| 6  | 2.431481000  | 2.921165000  | -1.558565000 |
| 1  | 3.487879000  | 3.189228000  | -1.678156000 |
| 1  | 2.316431000  | 1.878250000  | -1.873603000 |
| 1  | 1.865479000  | 3.545554000  | -2.261776000 |
| 15 | -2.328516000 | -0.764008000 | 0.065548000  |
| 15 | 0.221988000  | 2.427334000  | 0.068041000  |
| 15 | 2.106929000  | -1.292975000 | 0.082422000  |
| 7  | -0.094105000 | -0.048237000 | -2.583020000 |
| 1  | -0.969719000 | 0.354341000  | -2.908469000 |
| 7  | -0.022404000 | -1.373143000 | -3.156179000 |
| 1  | 0.500193000  | -1.343503000 | -4.031832000 |
| 1  | 0.533858000  | -1.917295000 | -2.497038000 |
| 1  | 0.643622000  | 0.552585000  | -2.951193000 |

[1b'<sub>PSi</sub>]-NH<sub>2</sub>-NH<sub>2</sub> (TE = -3315.808576)

|    |              |              |              |
|----|--------------|--------------|--------------|
| 6  | -0.079218000 | 2.670289000  | 1.848263000  |
| 6  | 0.340349000  | 1.584058000  | 2.844710000  |
| 6  | -2.820416000 | -0.272817000 | 1.980985000  |
| 6  | -1.674828000 | -0.790806000 | 2.848055000  |
| 6  | 2.495868000  | -1.508909000 | 1.743555000  |
| 6  | 1.370160000  | -1.372562000 | 2.773225000  |
| 1  | -2.933933000 | 0.813622000  | 2.111702000  |
| 1  | -1.846497000 | -0.515982000 | 3.899010000  |
| 1  | 3.151853000  | -2.370990000 | 1.937355000  |
| 1  | 1.796730000  | -1.076347000 | 3.742271000  |
| 1  | 0.244492000  | 3.675988000  | 2.151987000  |
| 1  | 1.420900000  | 1.666078000  | 3.036982000  |
| 6  | -0.025519000 | 3.736646000  | -0.888774000 |
| 1  | 0.478021000  | 3.577197000  | -1.855616000 |
| 6  | -3.032219000 | -2.311704000 | -0.051159000 |
| 1  | -2.497640000 | -2.793623000 | 0.783090000  |
| 6  | 3.500127000  | -1.042567000 | -0.908511000 |
| 1  | 3.539018000  | 0.024881000  | -0.645032000 |
| 23 | -0.086697000 | -0.085207000 | -0.392507000 |
| 1  | -1.175317000 | 2.709743000  | 1.770865000  |
| 1  | -0.142393000 | 1.760898000  | 3.816965000  |

|   |              |              |              |
|---|--------------|--------------|--------------|
| 1 | 0.904726000  | -2.350980000 | 2.946624000  |
| 1 | 3.152250000  | -0.627003000 | 1.797451000  |
| 1 | -1.670087000 | -1.891309000 | 2.828420000  |
| 1 | -3.792950000 | -0.710859000 | 2.248514000  |
| 6 | 4.826989000  | -1.648453000 | -0.460636000 |
| 1 | 5.659538000  | -1.052775000 | -0.854884000 |
| 1 | 4.937645000  | -1.667857000 | 0.626914000  |
| 1 | 4.975905000  | -2.667125000 | -0.822679000 |
| 6 | 3.318486000  | -1.116665000 | -2.418591000 |
| 1 | 3.152940000  | -2.145370000 | -2.763278000 |
| 1 | 2.474072000  | -0.503098000 | -2.752742000 |
| 1 | 4.207281000  | -0.748341000 | -2.944100000 |
| 6 | -4.514191000 | -2.619536000 | 0.101703000  |
| 1 | -4.679713000 | -3.701078000 | 0.178204000  |
| 1 | -4.956081000 | -2.161818000 | 0.991329000  |
| 1 | -5.087337000 | -2.276261000 | -0.765968000 |
| 6 | -2.482991000 | -2.907846000 | -1.341237000 |
| 1 | -2.952214000 | -2.461865000 | -2.227536000 |
| 1 | -1.399606000 | -2.755036000 | -1.418377000 |
| 1 | -2.672021000 | -3.986630000 | -1.394149000 |
| 6 | -1.528193000 | 3.646865000  | -1.131619000 |
| 1 | -1.817712000 | 2.679741000  | -1.556727000 |
| 1 | -2.095823000 | 3.770419000  | -0.201417000 |
| 1 | -1.864969000 | 4.433052000  | -1.817244000 |
| 6 | 0.351271000  | 5.124278000  | -0.386434000 |
| 1 | 1.429724000  | 5.293550000  | -0.391320000 |
| 1 | -0.094061000 | 5.899995000  | -1.021391000 |
| 1 | -0.006688000 | 5.305635000  | 0.632300000  |
| 6 | 1.642631000  | -3.359428000 | -0.401852000 |
| 1 | 1.177228000  | -3.346455000 | -1.401062000 |
| 6 | 0.617091000  | -3.922764000 | 0.577725000  |
| 1 | 1.070133000  | -4.096809000 | 1.559762000  |
| 1 | -0.231468000 | -3.244831000 | 0.721998000  |
| 1 | 0.228042000  | -4.886049000 | 0.227678000  |
| 6 | 2.866019000  | -4.262936000 | -0.457972000 |
| 1 | 2.564758000  | -5.313467000 | -0.554660000 |
| 1 | 3.516245000  | -4.039089000 | -1.306340000 |
| 1 | 3.471901000  | -4.189793000 | 0.452035000  |
| 6 | -3.811169000 | 0.591072000  | -0.567459000 |
| 1 | -3.379520000 | 1.572629000  | -0.315802000 |
| 6 | -5.220819000 | 0.566831000  | 0.014262000  |
| 1 | -5.797605000 | -0.300771000 | -0.312172000 |
| 1 | -5.228064000 | 0.574869000  | 1.107201000  |
| 1 | -5.776572000 | 1.453681000  | -0.314346000 |
| 6 | -3.839947000 | 0.487871000  | -2.085824000 |
| 1 | -4.223980000 | -0.482616000 | -2.421985000 |

|    |              |              |              |
|----|--------------|--------------|--------------|
| 1  | -4.487928000 | 1.253954000  | -2.527538000 |
| 1  | -2.841105000 | 0.624082000  | -2.518615000 |
| 6  | 2.390490000  | 2.492023000  | 0.314559000  |
| 1  | 2.689353000  | 1.506501000  | 0.704366000  |
| 6  | 2.905104000  | 3.534698000  | 1.299434000  |
| 1  | 3.996877000  | 3.467366000  | 1.381378000  |
| 1  | 2.675989000  | 4.558810000  | 0.996229000  |
| 1  | 2.501712000  | 3.395417000  | 2.305524000  |
| 6  | 3.023543000  | 2.655635000  | -1.062280000 |
| 1  | 4.112706000  | 2.538323000  | -1.016137000 |
| 1  | 2.639938000  | 1.920434000  | -1.780404000 |
| 1  | 2.830655000  | 3.651483000  | -1.478060000 |
| 15 | -2.479780000 | -0.521693000 | 0.169012000  |
| 15 | 0.530180000  | 2.257147000  | 0.140018000  |
| 15 | 1.909703000  | -1.529709000 | -0.028093000 |
| 14 | 0.002718000  | -0.182102000 | 2.128020000  |
| 7  | -0.242316000 | -0.444930000 | -2.633654000 |
| 1  | 0.380961000  | -1.197346000 | -2.917836000 |
| 1  | -1.186411000 | -0.777595000 | -2.831746000 |
| 7  | 0.095156000  | 0.692820000  | -3.460539000 |
| 1  | -0.457735000 | 0.671208000  | -4.318532000 |
| 1  | -0.213328000 | 1.507763000  | -2.932567000 |

[1c'<sub>PB</sub>]-NH<sub>2</sub>-NH<sub>2</sub> (TE = -3051.151225)

|    |              |              |              |
|----|--------------|--------------|--------------|
| 6  | 0.108919000  | 2.502668000  | 2.032832000  |
| 6  | 0.574055000  | 1.295604000  | 2.849439000  |
| 6  | -2.635887000 | 0.155535000  | 1.968069000  |
| 6  | -1.536419000 | -0.486045000 | 2.813383000  |
| 6  | 2.286437000  | -1.339223000 | 1.789065000  |
| 6  | 1.019879000  | -1.381754000 | 2.640061000  |
| 1  | -2.562706000 | 1.250629000  | 1.989659000  |
| 1  | -1.708099000 | -0.199072000 | 3.867246000  |
| 1  | 3.037360000  | -2.079356000 | 2.095545000  |
| 1  | 1.324790000  | -1.411019000 | 3.703889000  |
| 1  | 0.444630000  | 3.464937000  | 2.447138000  |
| 1  | 1.676774000  | 1.289408000  | 2.862466000  |
| 6  | 0.022699000  | 3.860401000  | -0.571756000 |
| 1  | 0.714526000  | 4.682303000  | -0.333683000 |
| 6  | -2.974327000 | -2.123299000 | 0.190026000  |
| 1  | -2.058074000 | -2.589869000 | 0.580525000  |
| 6  | 3.515198000  | -1.103900000 | -0.805419000 |
| 1  | 3.703152000  | -0.087457000 | -0.426275000 |
| 23 | -0.043215000 | 0.034247000  | -0.368235000 |
| 1  | -0.984895000 | 2.545640000  | 2.013356000  |
| 1  | 0.295976000  | 1.477519000  | 3.903987000  |
| 1  | 0.509541000  | -2.344881000 | 2.475102000  |

|   |              |              |              |
|---|--------------|--------------|--------------|
| 1 | 2.774426000  | -0.357562000 | 1.878709000  |
| 1 | -1.692778000 | -1.577404000 | 2.801661000  |
| 1 | -3.647333000 | -0.084680000 | 2.328414000  |
| 6 | 4.698917000  | -1.982037000 | -0.427182000 |
| 1 | 5.630348000  | -1.578863000 | -0.842668000 |
| 1 | 4.836221000  | -2.060803000 | 0.654948000  |
| 1 | 4.592192000  | -2.997346000 | -0.824494000 |
| 6 | 3.371805000  | -1.013913000 | -2.317608000 |
| 1 | 3.141225000  | -1.989709000 | -2.763954000 |
| 1 | 2.572122000  | -0.322457000 | -2.603064000 |
| 1 | 4.296604000  | -0.662084000 | -2.789312000 |
| 6 | -4.116775000 | -2.558949000 | 1.098355000  |
| 1 | -4.183492000 | -3.653803000 | 1.114106000  |
| 1 | -3.972975000 | -2.237278000 | 2.133541000  |
| 1 | -5.090587000 | -2.190365000 | 0.768565000  |
| 6 | -3.157484000 | -2.620276000 | -1.238808000 |
| 1 | -4.085768000 | -2.244040000 | -1.684317000 |
| 1 | -2.331259000 | -2.312350000 | -1.890098000 |
| 1 | -3.213537000 | -3.714892000 | -1.270553000 |
| 6 | -0.007683000 | 3.658840000  | -2.083388000 |
| 1 | 0.954821000  | 3.346159000  | -2.498051000 |
| 1 | -0.742534000 | 2.886363000  | -2.342895000 |
| 1 | -0.306986000 | 4.577548000  | -2.600985000 |
| 6 | -1.370575000 | 4.233425000  | -0.082122000 |
| 1 | -1.384417000 | 4.542454000  | 0.965744000  |
| 1 | -1.785330000 | 5.057235000  | -0.674047000 |
| 1 | -2.059507000 | 3.383221000  | -0.186156000 |
| 6 | 1.761929000  | -3.395490000 | -0.269050000 |
| 1 | 2.248547000  | -3.553396000 | -1.246291000 |
| 6 | 0.311232000  | -3.848310000 | -0.384709000 |
| 1 | -0.201277000 | -3.752361000 | 0.579613000  |
| 1 | -0.264866000 | -3.254409000 | -1.101287000 |
| 1 | 0.248170000  | -4.901893000 | -0.682589000 |
| 6 | 2.476940000  | -4.249025000 | 0.771755000  |
| 1 | 2.427304000  | -5.310041000 | 0.499164000  |
| 1 | 3.530984000  | -3.995421000 | 0.897839000  |
| 1 | 1.999019000  | -4.151745000 | 1.752523000  |
| 6 | -3.808254000 | 0.691443000  | -0.592626000 |
| 1 | -3.670345000 | 1.663631000  | -0.093448000 |
| 6 | -5.237392000 | 0.240309000  | -0.327314000 |
| 1 | -5.474750000 | -0.693028000 | -0.847306000 |
| 1 | -5.436480000 | 0.085773000  | 0.736787000  |
| 1 | -5.951972000 | 0.991003000  | -0.686016000 |
| 6 | -3.557157000 | 0.911930000  | -2.079350000 |
| 1 | -3.487150000 | -0.029915000 | -2.636093000 |
| 1 | -4.360429000 | 1.500406000  | -2.537719000 |



|    |              |              |              |
|----|--------------|--------------|--------------|
| 1  | -2.624432000 | 1.466575000  | -2.233570000 |
| 6  | 2.496501000  | 2.616859000  | 0.416750000  |
| 1  | 2.852463000  | 1.688944000  | 0.890617000  |
| 6  | 2.905783000  | 3.786982000  | 1.299099000  |
| 1  | 3.995099000  | 3.912547000  | 1.298217000  |
| 1  | 2.480235000  | 4.735826000  | 0.952306000  |
| 1  | 2.600294000  | 3.650785000  | 2.339387000  |
| 6  | 3.144467000  | 2.710809000  | -0.958161000 |
| 1  | 4.236675000  | 2.650505000  | -0.885740000 |
| 1  | 2.813532000  | 1.903273000  | -1.622694000 |
| 1  | 2.913870000  | 3.663500000  | -1.448444000 |
| 15 | -2.436831000 | -0.321845000 | 0.196277000  |
| 15 | 0.645660000  | 2.303472000  | 0.276171000  |
| 15 | 1.867783000  | -1.519684000 | -0.003740000 |
| 5  | -0.001742000 | -0.157780000 | 2.444371000  |
| 7  | -0.131928000 | 0.051214000  | -2.638654000 |
| 1  | 0.636803000  | 0.619909000  | -2.997070000 |
| 1  | -0.984776000 | 0.508513000  | -2.950334000 |
| 7  | -0.139137000 | -1.260094000 | -3.245428000 |
| 1  | 0.310915000  | -1.216621000 | -4.160770000 |
| 1  | 0.462215000  | -1.831738000 | -2.653687000 |

[1d'<sub>sc</sub>]-NH<sub>2</sub>-NH<sub>2</sub> (TE = -2879.532095)

|    |              |              |              |
|----|--------------|--------------|--------------|
| 6  | 0.999291000  | 1.684434000  | 2.006340000  |
| 6  | 0.727507000  | 0.271064000  | 2.492601000  |
| 6  | -2.468662000 | 1.057210000  | 1.268028000  |
| 6  | -1.762749000 | 0.078482000  | 2.199694000  |
| 6  | 0.915119000  | -2.652828000 | 1.502968000  |
| 6  | -0.324886000 | -1.947866000 | 2.025688000  |
| 1  | -1.939157000 | 2.012838000  | 1.197850000  |
| 1  | -1.702999000 | 0.573120000  | 3.189733000  |
| 1  | 0.854106000  | -3.738873000 | 1.624972000  |
| 1  | -0.382695000 | -2.185855000 | 3.112247000  |
| 1  | 1.783406000  | 2.182960000  | 2.587138000  |
| 1  | 1.671617000  | -0.288534000 | 2.407395000  |
| 6  | 1.337222000  | 3.320249000  | -0.334496000 |
| 1  | 1.692969000  | 3.238101000  | -1.369780000 |
| 6  | -3.586958000 | -1.049649000 | -0.288009000 |
| 1  | -3.160953000 | -1.604627000 | 0.556341000  |
| 6  | 3.040527000  | -1.882836000 | -0.213677000 |
| 1  | 3.135667000  | -1.134052000 | 0.585248000  |
| 23 | -0.108469000 | -0.189750000 | -0.486098000 |
| 16 | -2.498300000 | 0.469575000  | -0.472884000 |
| 16 | 1.533675000  | 1.564081000  | 0.249401000  |
| 16 | 1.201989000  | -2.273618000 | -0.286262000 |
| 6  | -0.391798000 | -0.446279000 | 1.735343000  |

|   |              |              |              |
|---|--------------|--------------|--------------|
| 1 | 0.095287000  | 2.303274000  | 2.054810000  |
| 1 | 0.529242000  | 0.330884000  | 3.584731000  |
| 1 | -1.206357000 | -2.435614000 | 1.581658000  |
| 1 | 1.818154000  | -2.321672000 | 2.026681000  |
| 1 | -2.448835000 | -0.765417000 | 2.369263000  |
| 1 | -3.492819000 | 1.283694000  | 1.591753000  |
| 6 | 3.844666000  | -3.123032000 | 0.113141000  |
| 1 | 4.913052000  | -2.887615000 | 0.188528000  |
| 1 | 3.543928000  | -3.575814000 | 1.062265000  |
| 1 | 3.727998000  | -3.883348000 | -0.666468000 |
| 6 | 3.429869000  | -1.263220000 | -1.538586000 |
| 1 | 3.266056000  | -1.962531000 | -2.367655000 |
| 1 | 2.859907000  | -0.350733000 | -1.741640000 |
| 1 | 4.492758000  | -0.999361000 | -1.544582000 |
| 6 | -5.024003000 | -0.665202000 | -0.008409000 |
| 1 | -5.650501000 | -1.557207000 | 0.108731000  |
| 1 | -5.126375000 | -0.078588000 | 0.908793000  |
| 1 | -5.443530000 | -0.073810000 | -0.829038000 |
| 6 | -3.424344000 | -1.872142000 | -1.547752000 |
| 1 | -3.754911000 | -1.320370000 | -2.436710000 |
| 1 | -2.374121000 | -2.157934000 | -1.688590000 |
| 1 | -4.019659000 | -2.789502000 | -1.493441000 |
| 6 | -0.104610000 | 3.787875000  | -0.333204000 |
| 1 | -0.768830000 | 3.073790000  | -0.833063000 |
| 1 | -0.483319000 | 3.928855000  | 0.684865000  |
| 1 | -0.197436000 | 4.754673000  | -0.840678000 |
| 6 | 2.248595000  | 4.254103000  | 0.438854000  |
| 1 | 3.285955000  | 3.910428000  | 0.432190000  |
| 1 | 2.224838000  | 5.262382000  | 0.010242000  |
| 1 | 1.933059000  | 4.344194000  | 1.483443000  |
| 7 | -0.022503000 | -0.092053000 | -2.758338000 |
| 7 | 0.399095000  | 1.195227000  | -3.268481000 |
| 1 | 0.008920000  | 1.339750000  | -4.200954000 |
| 1 | -0.052917000 | 1.878238000  | -2.662038000 |
| 1 | 0.636043000  | -0.773581000 | -3.127190000 |
| 1 | -0.935449000 | -0.352893000 | -3.134289000 |

[1e'<sub>ssi</sub>]-NH<sub>2</sub>-NH<sub>2</sub> (TE = -3130.946603)

|    |              |              |              |
|----|--------------|--------------|--------------|
| 23 | 0.051078000  | -0.099502000 | 0.773223000  |
| 16 | -2.000979000 | -1.531278000 | 0.762932000  |
| 16 | 2.357236000  | -1.043552000 | 1.126297000  |
| 16 | 0.447400000  | 1.866109000  | -0.708032000 |
| 14 | 0.380794000  | -1.146242000 | -1.474057000 |
| 6  | 0.410517000  | 0.169330000  | -2.881701000 |
| 6  | -0.257078000 | 1.442379000  | -2.374587000 |
| 6  | 2.453575000  | -2.470860000 | -0.050663000 |

|   |              |              |              |
|---|--------------|--------------|--------------|
| 6 | 2.033519000  | -2.144120000 | -1.479023000 |
| 6 | -1.085979000 | -2.359693000 | -1.784063000 |
| 6 | -1.628330000 | -2.870552000 | -0.457499000 |
| 1 | -0.883895000 | -3.476574000 | 0.070994000  |
| 1 | -2.529260000 | -3.489484000 | -0.547236000 |
| 1 | -1.881005000 | -1.824864000 | -2.324906000 |
| 1 | -0.829352000 | -3.223729000 | -2.414887000 |
| 1 | 3.462913000  | -2.892948000 | 0.030744000  |
| 1 | 1.772586000  | -3.197050000 | 0.406821000  |
| 1 | 2.820309000  | -1.549933000 | -1.965429000 |
| 1 | 1.986900000  | -3.085516000 | -2.045462000 |
| 1 | 1.451962000  | 0.397124000  | -3.149611000 |
| 1 | -0.083746000 | -0.139475000 | -3.813237000 |
| 1 | -1.339907000 | 1.304968000  | -2.252670000 |
| 1 | -0.093583000 | 2.302799000  | -3.033385000 |
| 6 | -3.411168000 | -0.650766000 | -0.115190000 |
| 1 | -2.926681000 | -0.075389000 | -0.916965000 |
| 6 | 3.545653000  | 0.139294000  | 0.305060000  |
| 1 | 3.067978000  | 0.410399000  | -0.646741000 |
| 6 | -0.421846000 | 3.474739000  | -0.330939000 |
| 1 | 0.173657000  | 3.836656000  | 0.518997000  |
| 6 | 4.903160000  | -0.485579000 | 0.060747000  |
| 1 | 5.590601000  | 0.253544000  | -0.366780000 |
| 1 | 5.349625000  | -0.850153000 | 0.992097000  |
| 1 | 4.859215000  | -1.323197000 | -0.639920000 |
| 6 | 3.627376000  | 1.369117000  | 1.186853000  |
| 1 | 2.635410000  | 1.796975000  | 1.368949000  |
| 1 | 4.083006000  | 1.135837000  | 2.155956000  |
| 1 | 4.237903000  | 2.143253000  | 0.710840000  |
| 6 | -0.323149000 | 4.479648000  | -1.462211000 |
| 1 | -0.972494000 | 4.209739000  | -2.300455000 |
| 1 | -0.642969000 | 5.471157000  | -1.122076000 |
| 1 | 0.697493000  | 4.571923000  | -1.843901000 |
| 6 | -1.846009000 | 3.237024000  | 0.127852000  |
| 1 | -2.338706000 | 4.180147000  | 0.393273000  |
| 1 | -2.448107000 | 2.763426000  | -0.656696000 |
| 1 | -1.875793000 | 2.578119000  | 1.001095000  |
| 6 | -4.018674000 | 0.296425000  | 0.899604000  |
| 1 | -4.742946000 | 0.964230000  | 0.420718000  |
| 1 | -4.545796000 | -0.256242000 | 1.685490000  |
| 1 | -3.259709000 | 0.916976000  | 1.383486000  |
| 6 | -4.438899000 | -1.604212000 | -0.687370000 |
| 1 | -5.292293000 | -1.043470000 | -1.086316000 |
| 1 | -4.045481000 | -2.213082000 | -1.504889000 |
| 1 | -4.826190000 | -2.280751000 | 0.082345000  |
| 7 | -0.125289000 | 0.611657000  | 2.933252000  |

|   |              |              |             |
|---|--------------|--------------|-------------|
| 7 | -1.422944000 | 0.469199000  | 3.554025000 |
| 1 | -1.808059000 | -0.400680000 | 3.191338000 |
| 1 | -1.307276000 | 0.337697000  | 4.558700000 |
| 1 | 0.594900000  | 0.124076000  | 3.468618000 |
| 1 | 0.105977000  | 1.599937000  | 2.992466000 |

[1f<sub>SB</sub>]-NH<sub>2</sub>-NH<sub>2</sub> (TE = -2866.294036)

|    |              |              |              |
|----|--------------|--------------|--------------|
| 6  | 1.050907000  | 2.175460000  | 1.683465000  |
| 6  | 0.800920000  | 0.907148000  | 2.485690000  |
| 6  | -2.540482000 | 1.409492000  | 1.022010000  |
| 6  | -1.924897000 | 0.677325000  | 2.207877000  |
| 6  | 0.884824000  | -2.292137000 | 1.940452000  |
| 6  | -0.383353000 | -1.566605000 | 2.348140000  |
| 1  | -1.978107000 | 2.315250000  | 0.771019000  |
| 1  | -1.905766000 | 1.409389000  | 3.035377000  |
| 1  | 0.882190000  | -3.356999000 | 2.197118000  |
| 1  | -0.492806000 | -1.725191000 | 3.439889000  |
| 1  | 1.832251000  | 2.813514000  | 2.113128000  |
| 1  | 1.740523000  | 0.332007000  | 2.510256000  |
| 6  | 1.380304000  | 3.285379000  | -0.958118000 |
| 1  | 1.827555000  | 3.020542000  | -1.926068000 |
| 6  | -3.502864000 | -1.036959000 | -0.074112000 |
| 1  | -3.048897000 | -1.407099000 | 0.852578000  |
| 6  | 3.035978000  | -1.849169000 | 0.145703000  |
| 1  | 3.165866000  | -0.984789000 | 0.812021000  |
| 23 | -0.077316000 | -0.118779000 | -0.500030000 |
| 16 | -2.479328000 | 0.454692000  | -0.551716000 |
| 16 | 1.586735000  | 1.693213000  | -0.015643000 |
| 16 | 1.185569000  | -2.155797000 | 0.113123000  |
| 1  | 0.136440000  | 2.775017000  | 1.590008000  |
| 1  | 0.649208000  | 1.227602000  | 3.533935000  |
| 1  | -1.246871000 | -2.095007000 | 1.914991000  |
| 1  | 1.766988000  | -1.845003000 | 2.412869000  |
| 1  | -2.645312000 | -0.085105000 | 2.545028000  |
| 1  | -3.579006000 | 1.721859000  | 1.193218000  |
| 6  | 3.773918000  | -3.056793000 | 0.684224000  |
| 1  | 4.852525000  | -2.865552000 | 0.731152000  |
| 1  | 3.447912000  | -3.327305000 | 1.692097000  |
| 1  | 3.620126000  | -3.930204000 | 0.041602000  |
| 6  | 3.470297000  | -1.479974000 | -1.256407000 |
| 1  | 3.274062000  | -2.296706000 | -1.961622000 |
| 1  | 2.949138000  | -0.585687000 | -1.613296000 |
| 1  | 4.545446000  | -1.274315000 | -1.287722000 |
| 6  | -4.949858000 | -0.657042000 | 0.158513000  |
| 1  | -5.540002000 | -1.537440000 | 0.438223000  |

|   |              |              |              |
|---|--------------|--------------|--------------|
| 1 | -5.064279000 | 0.074949000  | 0.962844000  |
| 1 | -5.399702000 | -0.232890000 | -0.745317000 |
| 6 | -3.325965000 | -2.072087000 | -1.163988000 |
| 1 | -3.701105000 | -1.711974000 | -2.129270000 |
| 1 | -2.269867000 | -2.332875000 | -1.295037000 |
| 1 | -3.876212000 | -2.986498000 | -0.918172000 |
| 6 | -0.073527000 | 3.655649000  | -1.167028000 |
| 1 | -0.642850000 | 2.828951000  | -1.605727000 |
| 1 | -0.559437000 | 3.925329000  | -0.223111000 |
| 1 | -0.160325000 | 4.524461000  | -1.829416000 |
| 6 | 2.184764000  | 4.404955000  | -0.326055000 |
| 1 | 3.226328000  | 4.118319000  | -0.159382000 |
| 1 | 2.178465000  | 5.294129000  | -0.966236000 |
| 1 | 1.761869000  | 4.703906000  | 0.638196000  |
| 5 | -0.458255000 | 0.009911000  | 2.031438000  |
| 7 | 0.007861000  | -0.368508000 | -2.753210000 |
| 1 | -0.776393000 | 0.122278000  | -3.176784000 |
| 1 | 0.848210000  | 0.077519000  | -3.121363000 |
| 7 | -0.086049000 | -1.740140000 | -3.205114000 |
| 1 | 0.470310000  | -1.861079000 | -4.050843000 |
| 1 | 0.354969000  | -2.301994000 | -2.478827000 |

[1a''<sub>PC</sub>]-NH<sub>2</sub>-NH<sub>2</sub> (TE = -3521.660077)

|   |              |              |             |
|---|--------------|--------------|-------------|
| 6 | 1.243699000  | -0.300564000 | 1.841511000 |
| 6 | 1.579483000  | 0.336741000  | 3.047909000 |
| 1 | 0.828961000  | 0.953227000  | 3.539661000 |
| 6 | 2.829322000  | 0.193312000  | 3.641355000 |
| 1 | 3.046362000  | 0.710291000  | 4.574820000 |
| 6 | 3.787800000  | -0.625673000 | 3.056296000 |
| 1 | 4.764227000  | -0.757906000 | 3.517585000 |
| 6 | 3.490394000  | -1.256000000 | 1.851255000 |
| 1 | 4.262875000  | -1.855025000 | 1.372330000 |
| 6 | 2.254837000  | -1.083371000 | 1.217056000 |
| 6 | -0.890001000 | 1.011064000  | 1.755580000 |
| 6 | -1.844493000 | 0.909260000  | 2.782725000 |
| 1 | -2.039058000 | -0.065386000 | 3.226008000 |
| 6 | -2.556330000 | 2.009644000  | 3.245866000 |
| 1 | -3.294465000 | 1.882764000  | 4.036262000 |
| 6 | -2.318592000 | 3.266955000  | 2.703602000 |
| 1 | -2.867464000 | 4.138305000  | 3.054892000 |
| 6 | -1.372993000 | 3.397396000  | 1.691451000 |
| 1 | -1.208676000 | 4.380831000  | 1.260884000 |
| 6 | -0.669702000 | 2.293215000  | 1.197304000 |
| 6 | -0.957065000 | -1.431393000 | 1.493750000 |
| 6 | -0.724430000 | -2.287599000 | 2.579553000 |
| 1 | 0.131955000  | -2.095517000 | 3.224701000 |

|    |              |              |              |
|----|--------------|--------------|--------------|
| 6  | -1.557806000 | -3.365816000 | 2.857729000  |
| 1  | -1.341308000 | -4.011660000 | 3.707331000  |
| 6  | -2.674687000 | -3.606583000 | 2.065560000  |
| 1  | -3.338801000 | -4.440950000 | 2.281023000  |
| 6  | -2.934990000 | -2.764791000 | 0.987068000  |
| 1  | -3.809112000 | -2.957155000 | 0.370155000  |
| 6  | -2.085691000 | -1.699520000 | 0.675961000  |
| 6  | -0.134126000 | -0.195013000 | 1.252660000  |
| 23 | 0.144981000  | 0.002700000  | -1.056202000 |
| 6  | 3.715958000  | -1.349162000 | -1.267426000 |
| 1  | 4.420062000  | -1.951577000 | -0.680853000 |
| 6  | -0.398371000 | 3.816865000  | -1.260565000 |
| 1  | -1.465447000 | 3.692198000  | -1.017329000 |
| 6  | -2.978655000 | -1.765824000 | -2.187081000 |
| 1  | -2.808217000 | -1.135168000 | -3.075719000 |
| 6  | -4.467282000 | -2.097353000 | -2.173479000 |
| 1  | -4.729423000 | -2.670299000 | -3.071347000 |
| 1  | -4.759816000 | -2.710442000 | -1.317548000 |
| 1  | -5.099908000 | -1.208375000 | -2.169442000 |
| 6  | -2.144930000 | -3.031607000 | -2.360536000 |
| 1  | -2.299072000 | -3.727254000 | -1.528958000 |
| 1  | -2.420513000 | -3.558828000 | -3.280835000 |
| 1  | -1.070088000 | -2.818301000 | -2.396249000 |
| 6  | 3.742876000  | -1.851308000 | -2.705531000 |
| 1  | 3.554010000  | -2.925266000 | -2.787977000 |
| 1  | 2.990275000  | -1.337825000 | -3.317926000 |
| 1  | 4.715262000  | -1.657713000 | -3.172138000 |
| 6  | 4.162355000  | 0.099887000  | -1.195584000 |
| 1  | 4.156653000  | 0.487729000  | -0.172590000 |
| 1  | 5.176938000  | 0.219282000  | -1.593266000 |
| 1  | 3.499370000  | 0.744091000  | -1.781222000 |
| 6  | 0.004758000  | 5.245710000  | -0.907720000 |
| 1  | -0.628375000 | 5.957073000  | -1.451617000 |
| 1  | -0.083831000 | 5.486295000  | 0.152762000  |
| 1  | 1.035022000  | 5.462943000  | -1.200972000 |
| 6  | -0.241552000 | 3.594018000  | -2.760285000 |
| 1  | 0.804593000  | 3.661545000  | -3.077657000 |
| 1  | -0.596731000 | 2.606875000  | -3.067491000 |
| 1  | -0.801026000 | 4.348373000  | -3.326297000 |
| 15 | -2.220702000 | -0.686594000 | -0.840996000 |
| 15 | 0.363614000  | 2.368809000  | -0.317914000 |
| 15 | 1.995434000  | -1.580369000 | -0.533239000 |
| 6  | 2.067396000  | 2.899238000  | 0.285389000  |
| 1  | 2.460508000  | 1.932760000  | 0.636321000  |
| 6  | 2.945570000  | 3.364665000  | -0.870984000 |
| 1  | 2.739527000  | 4.401701000  | -1.149585000 |

|   |              |              |              |
|---|--------------|--------------|--------------|
| 1 | 4.007014000  | 3.312596000  | -0.603774000 |
| 1 | 2.807952000  | 2.755564000  | -1.770532000 |
| 6 | 2.112477000  | 3.864828000  | 1.460086000  |
| 1 | 3.140614000  | 3.969972000  | 1.827306000  |
| 1 | 1.766877000  | 4.867159000  | 1.190376000  |
| 1 | 1.502149000  | 3.517647000  | 2.298118000  |
| 6 | 1.907769000  | -3.468634000 | -0.618954000 |
| 1 | 1.785103000  | -3.647954000 | -1.699542000 |
| 6 | 0.677058000  | -4.014203000 | 0.084452000  |
| 1 | 0.782243000  | -3.940767000 | 1.170168000  |
| 1 | -0.237426000 | -3.481302000 | -0.185463000 |
| 1 | 0.534930000  | -5.074157000 | -0.156788000 |
| 6 | 3.147158000  | -4.211167000 | -0.136787000 |
| 1 | 2.994228000  | -5.294493000 | -0.209642000 |
| 1 | 4.049882000  | -3.980330000 | -0.708035000 |
| 1 | 3.353059000  | -3.994078000 | 0.917048000  |
| 6 | -3.493473000 | 0.643821000  | -0.481733000 |
| 1 | -2.911144000 | 1.329841000  | 0.146852000  |
| 6 | -4.715386000 | 0.229906000  | 0.325533000  |
| 1 | -5.299433000 | 1.113508000  | 0.609733000  |
| 1 | -5.388012000 | -0.437053000 | -0.220144000 |
| 1 | -4.429148000 | -0.277275000 | 1.251495000  |
| 6 | -3.834195000 | 1.398664000  | -1.760951000 |
| 1 | -4.403320000 | 2.308086000  | -1.538166000 |
| 1 | -2.927047000 | 1.706796000  | -2.296537000 |
| 1 | -4.440603000 | 0.806193000  | -2.454357000 |
| 7 | 0.271533000  | -0.107432000 | -3.330959000 |
| 1 | 0.464430000  | -1.090368000 | -3.527223000 |
| 1 | -0.630183000 | 0.089119000  | -3.759557000 |
| 7 | 1.226136000  | 0.749897000  | -3.996329000 |
| 1 | 1.973321000  | 0.899606000  | -3.319781000 |
| 1 | 1.640838000  | 0.255394000  | -4.785597000 |

[1b''<sub>psi</sub>]-NH<sub>2</sub>-NH<sub>2</sub> (TE = -3773.066706)

|   |             |              |             |
|---|-------------|--------------|-------------|
| 6 | 1.156692000 | -1.367631000 | 2.035019000 |
| 6 | 1.029996000 | -1.936915000 | 3.308434000 |
| 1 | 0.243020000 | -1.582032000 | 3.975789000 |
| 6 | 1.861211000 | -2.968289000 | 3.734715000 |
| 1 | 1.735463000 | -3.403415000 | 4.724831000 |
| 6 | 2.848623000 | -3.448532000 | 2.880994000 |
| 1 | 3.501300000 | -4.259953000 | 3.197819000 |
| 6 | 2.995761000 | -2.898932000 | 1.610437000 |
| 1 | 3.766265000 | -3.302717000 | 0.959351000 |
| 6 | 2.155207000 | -1.869154000 | 1.173056000 |
| 6 | 0.499360000 | 1.628467000  | 2.068896000 |
| 6 | 0.960077000 | 1.808635000  | 3.378593000 |

|    |              |              |              |
|----|--------------|--------------|--------------|
| 1  | 0.995338000  | 0.952494000  | 4.054785000  |
| 6  | 1.414174000  | 3.043652000  | 3.831760000  |
| 1  | 1.782936000  | 3.154838000  | 4.850208000  |
| 6  | 1.405604000  | 4.134576000  | 2.968994000  |
| 1  | 1.765452000  | 5.104745000  | 3.306828000  |
| 6  | 0.944674000  | 3.983395000  | 1.664054000  |
| 1  | 0.959341000  | 4.848401000  | 1.006641000  |
| 6  | 0.499434000  | 2.740947000  | 1.200110000  |
| 6  | -1.756119000 | -0.414421000 | 1.960261000  |
| 6  | -2.202972000 | -0.097207000 | 3.249682000  |
| 1  | -1.493858000 | 0.301947000  | 3.976869000  |
| 6  | -3.538217000 | -0.228718000 | 3.615301000  |
| 1  | -3.864163000 | 0.039931000  | 4.618867000  |
| 6  | -4.460045000 | -0.685969000 | 2.678954000  |
| 1  | -5.511974000 | -0.777890000 | 2.943143000  |
| 6  | -4.038845000 | -1.017791000 | 1.395648000  |
| 1  | -4.781743000 | -1.361076000 | 0.682389000  |
| 6  | -2.695434000 | -0.890062000 | 1.021357000  |
| 23 | 0.070082000  | 0.020280000  | -1.162664000 |
| 6  | 3.784504000  | -0.040383000 | -0.354280000 |
| 1  | 4.617297000  | -0.704416000 | -0.087024000 |
| 6  | -1.757215000 | 3.293395000  | -0.492196000 |
| 1  | -1.578002000 | 4.344575000  | -0.227384000 |
| 6  | -2.002667000 | -3.129619000 | -0.751065000 |
| 1  | -2.263008000 | -3.370624000 | -1.794796000 |
| 6  | -2.957509000 | -3.859796000 | 0.183530000  |
| 1  | -2.895813000 | -4.942760000 | 0.022605000  |
| 1  | -2.694967000 | -3.673459000 | 1.229985000  |
| 1  | -4.001984000 | -3.571848000 | 0.058730000  |
| 6  | -0.580069000 | -3.609328000 | -0.498114000 |
| 1  | -0.240299000 | -3.349133000 | 0.511182000  |
| 1  | -0.515764000 | -4.699946000 | -0.592930000 |
| 1  | 0.132162000  | -3.162210000 | -1.197617000 |
| 6  | 4.086411000  | 0.644181000  | -1.679925000 |
| 1  | 4.178025000  | -0.052852000 | -2.519898000 |
| 1  | 3.286931000  | 1.352821000  | -1.927638000 |
| 1  | 5.020618000  | 1.215294000  | -1.629741000 |
| 6  | 3.622678000  | 0.994883000  | 0.745921000  |
| 1  | 3.376650000  | 0.549123000  | 1.714230000  |
| 1  | 4.547566000  | 1.570235000  | 0.869749000  |
| 1  | 2.825728000  | 1.705396000  | 0.506268000  |
| 6  | -2.428717000 | 3.219464000  | -1.855945000 |
| 1  | -3.382314000 | 3.760270000  | -1.856035000 |
| 1  | -1.819840000 | 3.635805000  | -2.664835000 |
| 1  | -2.645032000 | 2.177490000  | -2.117266000 |
| 6  | -2.653866000 | 2.677010000  | 0.569041000  |



|    |              |              |              |
|----|--------------|--------------|--------------|
| 1  | -2.876721000 | 1.630611000  | 0.339857000  |
| 1  | -2.208142000 | 2.701220000  | 1.567773000  |
| 1  | -3.610354000 | 3.210277000  | 0.618725000  |
| 14 | -0.006101000 | -0.046074000 | 1.309072000  |
| 15 | -0.063905000 | 2.465936000  | -0.547881000 |
| 15 | -2.098052000 | -1.235222000 | -0.704586000 |
| 15 | 2.262687000  | -1.139202000 | -0.530090000 |
| 6  | 2.991405000  | -2.601761000 | -1.518220000 |
| 1  | 2.537958000  | -3.472936000 | -1.023230000 |
| 6  | 4.505408000  | -2.789214000 | -1.521871000 |
| 1  | 4.766082000  | -3.728367000 | -2.024170000 |
| 1  | 5.014975000  | -1.990743000 | -2.070200000 |
| 1  | 4.953333000  | -2.825441000 | -0.527022000 |
| 6  | 2.482611000  | -2.582134000 | -2.952762000 |
| 1  | 1.392159000  | -2.519388000 | -2.990716000 |
| 1  | 2.888402000  | -1.730959000 | -3.516582000 |
| 1  | 2.783556000  | -3.486068000 | -3.494889000 |
| 6  | -3.641546000 | -0.861280000 | -1.751685000 |
| 1  | -4.066193000 | 0.018187000  | -1.242045000 |
| 6  | -3.214437000 | -0.440160000 | -3.152489000 |
| 1  | -2.870108000 | -1.297922000 | -3.739417000 |
| 1  | -4.055794000 | 0.001386000  | -3.699303000 |
| 1  | -2.395498000 | 0.283843000  | -3.146850000 |
| 6  | -4.729068000 | -1.923415000 | -1.889712000 |
| 1  | -4.337964000 | -2.850029000 | -2.322920000 |
| 1  | -5.227312000 | -2.188453000 | -0.956771000 |
| 1  | -5.509648000 | -1.567807000 | -2.572835000 |
| 6  | 0.953732000  | 3.760567000  | -1.506572000 |
| 1  | 1.913097000  | 3.760324000  | -0.966047000 |
| 6  | 0.429003000  | 5.192629000  | -1.562785000 |
| 1  | 1.171236000  | 5.846933000  | -2.034953000 |
| 1  | -0.481113000 | 5.267102000  | -2.166103000 |
| 1  | 0.198101000  | 5.624592000  | -0.587577000 |
| 6  | 1.225404000  | 3.279229000  | -2.926926000 |
| 1  | 1.708423000  | 2.298437000  | -2.935645000 |
| 1  | 0.299529000  | 3.205915000  | -3.511744000 |
| 1  | 1.882644000  | 3.974386000  | -3.461840000 |
| 7  | 0.413795000  | 0.041792000  | -3.438903000 |
| 1  | 1.428954000  | -0.051306000 | -3.493671000 |
| 7  | -0.231145000 | -0.927655000 | -4.298715000 |
| 1  | 0.453513000  | -1.296293000 | -4.957101000 |
| 1  | -0.485309000 | -1.704003000 | -3.688884000 |
| 1  | 0.199450000  | 0.952504000  | -3.836240000 |

[1c''<sub>PB</sub>]-NH<sub>2</sub>-NH<sub>2</sub> (TE = -3508.414634)

|   |             |              |             |
|---|-------------|--------------|-------------|
| 6 | 0.886801000 | -1.237011000 | 1.894568000 |
|---|-------------|--------------|-------------|

|    |              |              |              |
|----|--------------|--------------|--------------|
| 6  | 0.612429000  | -2.031848000 | 3.023045000  |
| 1  | -0.348476000 | -1.911338000 | 3.525004000  |
| 6  | 1.513967000  | -2.967673000 | 3.520046000  |
| 1  | 1.254643000  | -3.564979000 | 4.392838000  |
| 6  | 2.746367000  | -3.135634000 | 2.898370000  |
| 1  | 3.464384000  | -3.861112000 | 3.275991000  |
| 6  | 3.044687000  | -2.377063000 | 1.771326000  |
| 1  | 4.000173000  | -2.531588000 | 1.273804000  |
| 6  | 2.131304000  | -1.451157000 | 1.255759000  |
| 6  | 0.072043000  | 1.365530000  | 1.971772000  |
| 6  | 0.579210000  | 1.551066000  | 3.269783000  |
| 1  | 0.902120000  | 0.674232000  | 3.833083000  |
| 6  | 0.681400000  | 2.805031000  | 3.863220000  |
| 1  | 1.087346000  | 2.900817000  | 4.869186000  |
| 6  | 0.252222000  | 3.933960000  | 3.173491000  |
| 1  | 0.312305000  | 4.919821000  | 3.630335000  |
| 6  | -0.245275000 | 3.789488000  | 1.882460000  |
| 1  | -0.568075000 | 4.676406000  | 1.340046000  |
| 6  | -0.314575000 | 2.534256000  | 1.268024000  |
| 6  | -1.717781000 | -0.579167000 | 1.619023000  |
| 6  | -2.411444000 | -0.208426000 | 2.785050000  |
| 1  | -1.891415000 | 0.391116000  | 3.533383000  |
| 6  | -3.740516000 | -0.549039000 | 3.008087000  |
| 1  | -4.240411000 | -0.231744000 | 3.922036000  |
| 6  | -4.433175000 | -1.278176000 | 2.047790000  |
| 1  | -5.480387000 | -1.535781000 | 2.194614000  |
| 6  | -3.774584000 | -1.671206000 | 0.888447000  |
| 1  | -4.332513000 | -2.228081000 | 0.139546000  |
| 6  | -2.431452000 | -1.341578000 | 0.667034000  |
| 23 | 0.142157000  | 0.085493000  | -1.060295000 |
| 6  | 3.886516000  | 0.514974000  | 0.090955000  |
| 1  | 4.694300000  | -0.153735000 | 0.420821000  |
| 6  | -2.568095000 | 2.840825000  | -0.619533000 |
| 1  | -2.620293000 | 3.904276000  | -0.348521000 |
| 6  | -1.169900000 | -3.602367000 | -0.781874000 |
| 1  | -1.551907000 | -4.027088000 | -1.719602000 |
| 6  | -1.853026000 | -4.304527000 | 0.382917000  |
| 1  | -1.619615000 | -5.375784000 | 0.372005000  |
| 1  | -1.507329000 | -3.904686000 | 1.342499000  |
| 1  | -2.941077000 | -4.204732000 | 0.371268000  |
| 6  | 0.328738000  | -3.853048000 | -0.746382000 |
| 1  | 0.789658000  | -3.437800000 | 0.155199000  |
| 1  | 0.538659000  | -4.929367000 | -0.755256000 |
| 1  | 0.833741000  | -3.408728000 | -1.607735000 |
| 6  | 4.368797000  | 1.306099000  | -1.118580000 |
| 1  | 4.490284000  | 0.698838000  | -2.020070000 |

|    |              |              |              |
|----|--------------|--------------|--------------|
| 1  | 3.665912000  | 2.105788000  | -1.369886000 |
| 1  | 5.331230000  | 1.788406000  | -0.912904000 |
| 6  | 3.535064000  | 1.437774000  | 1.248250000  |
| 1  | 3.277911000  | 0.881445000  | 2.153815000  |
| 1  | 4.378527000  | 2.095689000  | 1.488335000  |
| 1  | 2.676387000  | 2.077198000  | 1.016084000  |
| 6  | -3.033060000 | 2.659155000  | -2.059178000 |
| 1  | -4.061801000 | 3.011476000  | -2.194600000 |
| 1  | -2.410009000 | 3.191787000  | -2.787027000 |
| 1  | -3.015698000 | 1.595152000  | -2.329766000 |
| 6  | -3.458708000 | 2.064324000  | 0.332547000  |
| 1  | -3.468648000 | 0.996931000  | 0.092932000  |
| 1  | -3.137045000 | 2.158814000  | 1.372868000  |
| 1  | -4.492307000 | 2.423837000  | 0.268055000  |
| 5  | -0.187590000 | -0.133310000 | 1.471990000  |
| 15 | 2.446124000  | -0.608907000 | -0.349936000 |
| 15 | -0.762719000 | 2.342902000  | -0.500609000 |
| 15 | -1.571989000 | -1.746599000 | -0.908850000 |
| 6  | 0.030366000  | 3.810840000  | -1.414591000 |
| 1  | 0.051866000  | 3.437836000  | -2.452385000 |
| 6  | 1.473751000  | 4.002969000  | -0.970949000 |
| 1  | 2.034611000  | 4.609231000  | -1.691730000 |
| 1  | 1.531849000  | 4.509370000  | -0.002667000 |
| 1  | 1.992739000  | 3.048541000  | -0.852648000 |
| 6  | -0.696156000 | 5.151423000  | -1.443606000 |
| 1  | -0.119733000 | 5.872394000  | -2.035617000 |
| 1  | -1.690553000 | 5.097419000  | -1.892003000 |
| 1  | -0.809906000 | 5.589364000  | -0.447901000 |
| 6  | 3.304708000  | -1.962028000 | -1.373075000 |
| 1  | 2.883521000  | -2.881713000 | -0.945902000 |
| 6  | 4.823809000  | -2.074520000 | -1.296026000 |
| 1  | 5.158715000  | -2.956555000 | -1.854454000 |
| 1  | 5.331503000  | -1.213671000 | -1.740275000 |
| 1  | 5.205669000  | -2.183101000 | -0.278242000 |
| 6  | 2.860487000  | -1.874543000 | -2.829303000 |
| 1  | 3.263309000  | -2.710341000 | -3.413671000 |
| 1  | 1.768048000  | -1.903893000 | -2.913957000 |
| 1  | 3.189023000  | -0.944508000 | -3.304461000 |
| 6  | -2.984224000 | -1.744818000 | -2.169201000 |
| 1  | -3.648613000 | -0.954166000 | -1.788873000 |
| 6  | -2.453139000 | -1.303408000 | -3.528134000 |
| 1  | -1.674240000 | -1.985217000 | -3.895568000 |
| 1  | -3.248532000 | -1.288741000 | -4.282313000 |
| 1  | -2.020743000 | -0.299923000 | -3.481754000 |
| 6  | -3.794481000 | -3.027156000 | -2.338240000 |
| 1  | -3.241849000 | -3.779765000 | -2.909829000 |

|   |              |              |              |
|---|--------------|--------------|--------------|
| 1 | -4.088572000 | -3.496370000 | -1.397210000 |
| 1 | -4.712658000 | -2.824956000 | -2.901488000 |
| 7 | 0.454181000  | 0.588687000  | -3.260046000 |
| 1 | -0.353584000 | 1.150283000  | -3.532751000 |
| 1 | 0.438398000  | -0.230045000 | -3.863705000 |
| 7 | 1.686569000  | 1.283844000  | -3.553724000 |
| 1 | 1.522745000  | 1.979935000  | -4.280603000 |
| 1 | 1.919800000  | 1.794723000  | -2.703985000 |

[1d''<sub>sc</sub>]-NH<sub>2</sub>-NH<sub>2</sub> (TE = -3336.805302)

|    |              |              |              |
|----|--------------|--------------|--------------|
| 6  | -0.055848000 | -1.258575000 | -1.485813000 |
| 6  | 0.575351000  | -1.551889000 | -2.707972000 |
| 1  | 1.150859000  | -0.766097000 | -3.194421000 |
| 6  | 0.487346000  | -2.798200000 | -3.318585000 |
| 1  | 0.997205000  | -2.972303000 | -4.264614000 |
| 6  | -0.254004000 | -3.816011000 | -2.728131000 |
| 1  | -0.329071000 | -4.794996000 | -3.196094000 |
| 6  | -0.868427000 | -3.576170000 | -1.504010000 |
| 1  | -1.404741000 | -4.374991000 | -0.994490000 |
| 6  | -0.761344000 | -2.328133000 | -0.889183000 |
| 6  | -1.189957000 | 0.952292000  | -1.298586000 |
| 6  | -1.772621000 | 0.812370000  | -2.570659000 |
| 1  | -1.376596000 | 0.049799000  | -3.239460000 |
| 6  | -2.824287000 | 1.608995000  | -3.008890000 |
| 1  | -3.238638000 | 1.456533000  | -4.004057000 |
| 6  | -3.340199000 | 2.601640000  | -2.182646000 |
| 1  | -4.162691000 | 3.231663000  | -2.513874000 |
| 6  | -2.814221000 | 2.751585000  | -0.904458000 |
| 1  | -3.241753000 | 3.481314000  | -0.218825000 |
| 6  | -1.771108000 | 1.935122000  | -0.463935000 |
| 6  | 1.297162000  | 0.817533000  | -1.191083000 |
| 6  | 1.423160000  | 1.656492000  | -2.312698000 |
| 1  | 0.548820000  | 1.811007000  | -2.942424000 |
| 6  | 2.610070000  | 2.297945000  | -2.646617000 |
| 1  | 2.648489000  | 2.939448000  | -3.525483000 |
| 6  | 3.741093000  | 2.124146000  | -1.857779000 |
| 1  | 4.673452000  | 2.630177000  | -2.098073000 |
| 6  | 3.653283000  | 1.320826000  | -0.726694000 |
| 1  | 4.507670000  | 1.223541000  | -0.060861000 |
| 6  | 2.458672000  | 0.675488000  | -0.394403000 |
| 16 | 2.362072000  | -0.099846000 | 1.227352000  |
| 16 | -1.326253000 | -2.174388000 | 0.806830000  |
| 16 | -1.343340000 | 1.997353000  | 1.279771000  |
| 23 | -0.104818000 | -0.116482000 | 1.362006000  |
| 6  | -3.211794000 | -2.150996000 | 0.676282000  |
| 1  | -3.474883000 | -3.171574000 | 0.371355000  |

|   |              |              |              |
|---|--------------|--------------|--------------|
| 6 | -0.397894000 | 3.624420000  | 1.457021000  |
| 1 | -1.163130000 | 4.398564000  | 1.318593000  |
| 6 | 3.257086000  | -1.756602000 | 1.063809000  |
| 1 | 3.273185000  | -2.051511000 | 2.121287000  |
| 6 | 4.671892000  | -1.565365000 | 0.563024000  |
| 1 | 5.221387000  | -2.512312000 | 0.612907000  |
| 1 | 4.683752000  | -1.241849000 | -0.482589000 |
| 1 | 5.225216000  | -0.828144000 | 1.151466000  |
| 6 | 2.482399000  | -2.771687000 | 0.259499000  |
| 1 | 2.382769000  | -2.466347000 | -0.786765000 |
| 1 | 2.997380000  | -3.739763000 | 0.272980000  |
| 1 | 1.475587000  | -2.921410000 | 0.658387000  |
| 6 | -3.709552000 | -1.875174000 | 2.079149000  |
| 1 | -3.328132000 | -2.599158000 | 2.807107000  |
| 1 | -3.401972000 | -0.871948000 | 2.401760000  |
| 1 | -4.803012000 | -1.910907000 | 2.116898000  |
| 6 | -3.715966000 | -1.146462000 | -0.328825000 |
| 1 | -3.303371000 | -1.316671000 | -1.326650000 |
| 1 | -4.808328000 | -1.202819000 | -0.405350000 |
| 1 | -3.454660000 | -0.126098000 | -0.031856000 |
| 6 | 0.117964000  | 3.643308000  | 2.880102000  |
| 1 | 0.628145000  | 4.587971000  | 3.094360000  |
| 1 | -0.682820000 | 3.522907000  | 3.616784000  |
| 1 | 0.845218000  | 2.835067000  | 3.032071000  |
| 6 | 0.704071000  | 3.775563000  | 0.438913000  |
| 1 | 1.468267000  | 3.002722000  | 0.568093000  |
| 1 | 0.333122000  | 3.707145000  | -0.587005000 |
| 1 | 1.193150000  | 4.750382000  | 0.552434000  |
| 6 | -0.003666000 | 0.117851000  | -0.859745000 |
| 7 | -0.153796000 | -0.518903000 | 3.596782000  |
| 1 | -1.091796000 | -0.370120000 | 3.971243000  |
| 7 | 0.334391000  | -1.841134000 | 3.915627000  |
| 1 | -0.092132000 | -2.166774000 | 4.782993000  |
| 1 | -0.012324000 | -2.448366000 | 3.174395000  |
| 1 | 0.451398000  | 0.133463000  | 4.089027000  |

[1e''<sub>ssi</sub>]-NH<sub>2</sub>-NH<sub>2</sub> (TE = -3588.208615)

|   |             |              |             |
|---|-------------|--------------|-------------|
| 6 | 0.848715000 | -1.345212000 | 1.790791000 |
| 6 | 0.738721000 | -1.684953000 | 3.146682000 |
| 1 | 0.096969000 | -1.086428000 | 3.794897000 |
| 6 | 1.415926000 | -2.771206000 | 3.693650000 |
| 1 | 1.303470000 | -3.010931000 | 4.749619000 |
| 6 | 2.232552000 | -3.556228000 | 2.884819000 |
| 1 | 2.761220000 | -4.411336000 | 3.301111000 |
| 6 | 2.352756000 | -3.259316000 | 1.530881000 |
| 1 | 2.965564000 | -3.886124000 | 0.884695000 |

|    |              |              |              |
|----|--------------|--------------|--------------|
| 6  | 1.666540000  | -2.169088000 | 0.995711000  |
| 6  | 0.827410000  | 1.714490000  | 1.420106000  |
| 6  | 1.181549000  | 2.084695000  | 2.725609000  |
| 1  | 0.942331000  | 1.413952000  | 3.552094000  |
| 6  | 1.843532000  | 3.277173000  | 3.003411000  |
| 1  | 2.108908000  | 3.529647000  | 4.028604000  |
| 6  | 2.175602000  | 4.142716000  | 1.965222000  |
| 1  | 2.701029000  | 5.073192000  | 2.170404000  |
| 6  | 1.855379000  | 3.801845000  | 0.655006000  |
| 1  | 2.137687000  | 4.458041000  | -0.166984000 |
| 6  | 1.192015000  | 2.602977000  | 0.392948000  |
| 6  | -1.862580000 | 0.214279000  | 1.413868000  |
| 6  | -2.341794000 | 0.742960000  | 2.620643000  |
| 1  | -1.630198000 | 1.010737000  | 3.402803000  |
| 6  | -3.697377000 | 0.968971000  | 2.845728000  |
| 1  | -4.031355000 | 1.393888000  | 3.790797000  |
| 6  | -4.622314000 | 0.670364000  | 1.851131000  |
| 1  | -5.681881000 | 0.861872000  | 2.007838000  |
| 6  | -4.185274000 | 0.143419000  | 0.639061000  |
| 1  | -4.898261000 | -0.067722000 | -0.155370000 |
| 6  | -2.824762000 | -0.087521000 | 0.429556000  |
| 16 | -2.329449000 | -0.709449000 | -1.211076000 |
| 16 | 1.819751000  | -1.888207000 | -0.796169000 |
| 16 | 0.862893000  | 2.200237000  | -1.351153000 |
| 23 | 0.113241000  | -0.191368000 | -1.525167000 |
| 6  | 3.592885000  | -1.255091000 | -0.854276000 |
| 1  | 4.195709000  | -2.097395000 | -0.491981000 |
| 6  | -0.528511000 | 3.425522000  | -1.677950000 |
| 1  | -0.068188000 | 4.409077000  | -1.521552000 |
| 6  | -2.645450000 | -2.558170000 | -0.985203000 |
| 1  | -2.304069000 | -2.928712000 | -1.962140000 |
| 6  | -4.119075000 | -2.856072000 | -0.807704000 |
| 1  | -4.292960000 | -3.937833000 | -0.837815000 |
| 1  | -4.481424000 | -2.501447000 | 0.162035000  |
| 1  | -4.732810000 | -2.395421000 | -1.586779000 |
| 6  | -1.791639000 | -3.145034000 | 0.114305000  |
| 1  | -2.032984000 | -2.703831000 | 1.087815000  |
| 1  | -1.958594000 | -4.225314000 | 0.194394000  |
| 1  | -0.727513000 | -2.979361000 | -0.069114000 |
| 6  | 3.903422000  | -0.971242000 | -2.308123000 |
| 1  | 3.757217000  | -1.847469000 | -2.945266000 |
| 1  | 3.256076000  | -0.170806000 | -2.688834000 |
| 1  | 4.940546000  | -0.637807000 | -2.418384000 |
| 6  | 3.790191000  | -0.043477000 | 0.027419000  |
| 1  | 3.519345000  | -0.233309000 | 1.069991000  |
| 1  | 4.840366000  | 0.270211000  | 0.008274000  |

|    |              |              |              |
|----|--------------|--------------|--------------|
| 1  | 3.186733000  | 0.798918000  | -0.324814000 |
| 6  | -0.926629000 | 3.256289000  | -3.128557000 |
| 1  | -1.696389000 | 3.984122000  | -3.404505000 |
| 1  | -0.081386000 | 3.386298000  | -3.811533000 |
| 1  | -1.348953000 | 2.255889000  | -3.291372000 |
| 6  | -1.695078000 | 3.227705000  | -0.737164000 |
| 1  | -2.156697000 | 2.246918000  | -0.890041000 |
| 1  | -1.402463000 | 3.295759000  | 0.314514000  |
| 1  | -2.461951000 | 3.989404000  | -0.919603000 |
| 14 | -0.028332000 | 0.087898000  | 0.881071000  |
| 7  | 0.105371000  | -0.515428000 | -3.781297000 |
| 1  | -0.845715000 | -0.365694000 | -4.119613000 |
| 1  | 0.684475000  | 0.160844000  | -4.273536000 |
| 7  | 0.593167000  | -1.821238000 | -4.168359000 |
| 1  | 0.335858000  | -2.446411000 | -3.405276000 |
| 1  | 0.091235000  | -2.143916000 | -4.994980000 |

[1f'<sub>SB</sub>]-NH<sub>2</sub>-NH<sub>2</sub> (TE = -3323.566068)

|   |              |              |             |
|---|--------------|--------------|-------------|
| 6 | -0.283363000 | 1.458274000  | 1.507937000 |
| 6 | 0.175959000  | 1.901299000  | 2.761885000 |
| 1 | 0.798650000  | 1.228722000  | 3.353889000 |
| 6 | -0.121336000 | 3.160562000  | 3.271907000 |
| 1 | 0.260612000  | 3.456573000  | 4.247522000 |
| 6 | -0.899394000 | 4.044244000  | 2.530111000 |
| 1 | -1.133146000 | 5.035144000  | 2.913606000 |
| 6 | -1.350177000 | 3.658230000  | 1.273223000 |
| 1 | -1.921656000 | 4.352230000  | 0.658767000 |
| 6 | -1.044849000 | 2.389510000  | 0.776941000 |
| 6 | -1.087918000 | -1.111340000 | 1.453421000 |
| 6 | -1.602773000 | -1.085403000 | 2.763042000 |
| 1 | -1.258055000 | -0.303150000 | 3.440599000 |
| 6 | -2.539256000 | -2.003131000 | 3.226578000 |
| 1 | -2.906773000 | -1.935215000 | 4.249130000 |
| 6 | -3.013011000 | -3.000435000 | 2.379981000 |
| 1 | -3.752382000 | -3.719354000 | 2.726416000 |
| 6 | -2.552340000 | -3.048651000 | 1.069846000 |
| 1 | -2.942496000 | -3.793637000 | 0.378206000 |
| 6 | -1.610745000 | -2.120001000 | 0.621524000 |
| 6 | 1.547604000  | -0.539016000 | 1.276022000 |
| 6 | 1.857685000  | -1.194479000 | 2.482337000 |
| 1 | 1.057718000  | -1.349884000 | 3.207283000 |
| 6 | 3.127579000  | -1.677263000 | 2.780152000 |
| 1 | 3.308613000  | -2.183630000 | 3.726805000 |
| 6 | 4.157535000  | -1.532374000 | 1.857403000 |
| 1 | 5.150657000  | -1.925102000 | 2.064799000 |
| 6 | 3.895828000  | -0.901497000 | 0.646898000 |

|    |              |              |              |
|----|--------------|--------------|--------------|
| 1  | 4.676601000  | -0.818434000 | -0.106027000 |
| 6  | 2.619655000  | -0.402699000 | 0.369308000  |
| 16 | 2.342059000  | 0.252435000  | -1.291566000 |
| 16 | -1.505527000 | 2.032200000  | -0.927184000 |
| 16 | -1.196172000 | -2.152787000 | -1.130777000 |
| 23 | -0.116323000 | 0.043892000  | -1.414745000 |
| 6  | -3.367877000 | 1.782760000  | -0.802163000 |
| 1  | -3.753382000 | 2.777141000  | -0.543504000 |
| 6  | -0.078995000 | -3.669314000 | -1.237450000 |
| 1  | -0.749431000 | -4.510131000 | -1.019427000 |
| 6  | 3.060892000  | 1.998789000  | -1.185722000 |
| 1  | 2.868191000  | 2.343594000  | -2.211388000 |
| 6  | 4.552221000  | 1.960274000  | -0.929971000 |
| 1  | 4.980127000  | 2.963601000  | -1.036378000 |
| 1  | 4.770410000  | 1.626259000  | 0.088935000  |
| 1  | 5.077036000  | 1.297108000  | -1.623303000 |
| 6  | 2.319653000  | 2.866847000  | -0.198272000 |
| 1  | 2.379552000  | 2.457731000  | 0.815984000  |
| 1  | 2.752824000  | 3.873607000  | -0.173069000 |
| 1  | 1.261895000  | 2.961420000  | -0.452892000 |
| 6  | -3.832637000 | 1.382158000  | -2.186269000 |
| 1  | -3.547704000 | 2.109852000  | -2.951053000 |
| 1  | -3.400029000 | 0.414335000  | -2.470115000 |
| 1  | -4.922078000 | 1.274864000  | -2.207232000 |
| 6  | -3.749057000 | 0.774438000  | 0.254634000  |
| 1  | -3.341864000 | 1.024832000  | 1.238129000  |
| 1  | -4.840139000 | 0.722281000  | 0.348185000  |
| 1  | -3.390483000 | -0.225199000 | -0.007398000 |
| 6  | 0.402498000  | -3.739446000 | -2.670872000 |
| 1  | 1.007399000  | -4.637530000 | -2.831788000 |
| 1  | -0.423426000 | -3.760545000 | -3.389070000 |
| 1  | 1.036043000  | -2.873168000 | -2.902613000 |
| 6  | 1.058261000  | -3.622631000 | -0.246537000 |
| 1  | 1.734965000  | -2.791038000 | -0.465188000 |
| 1  | 0.709281000  | -3.503029000 | 0.782677000  |
| 1  | 1.641583000  | -4.549552000 | -0.296148000 |
| 5  | 0.039409000  | -0.040964000 | 1.045473000  |
| 7  | -0.187286000 | 0.111329000  | -3.668252000 |
| 1  | 0.701679000  | -0.244667000 | -4.021163000 |
| 1  | -0.904259000 | -0.504780000 | -4.044912000 |
| 7  | -0.466286000 | 1.427906000  | -4.197106000 |
| 1  | -0.065223000 | 2.083819000  | -3.527873000 |
| 1  | 0.036469000  | 1.557804000  | -5.074048000 |

{[HIPTN<sub>3</sub>N]-V-NH<sub>2</sub>-NH<sub>2</sub>} (TE = -2205.341284)

|    |             |             |             |
|----|-------------|-------------|-------------|
| 23 | 0.184440000 | 0.173246000 | 0.450626000 |
|----|-------------|-------------|-------------|



|   |              |              |              |
|---|--------------|--------------|--------------|
| 7 | 2.126640000  | 0.597070000  | 0.449301000  |
| 7 | -0.555853000 | -1.406238000 | 1.362625000  |
| 7 | -1.099110000 | 1.676442000  | 0.367860000  |
| 6 | 2.370365000  | 1.763950000  | 1.286942000  |
| 1 | 3.446040000  | 1.943999000  | 1.423998000  |
| 1 | 1.969224000  | 2.693106000  | 0.847223000  |
| 6 | 1.753274000  | 1.501159000  | 2.654063000  |
| 1 | 2.385926000  | 0.788348000  | 3.190130000  |
| 1 | 1.705885000  | 2.414319000  | 3.263086000  |
| 6 | -0.917765000 | 2.654606000  | 1.437339000  |
| 1 | -0.084399000 | 3.353384000  | 1.247875000  |
| 1 | -1.811743000 | 3.283535000  | 1.554823000  |
| 6 | -0.681316000 | 1.884317000  | 2.720295000  |
| 1 | -1.594122000 | 1.333640000  | 2.965979000  |
| 1 | -0.450921000 | 2.543531000  | 3.570767000  |
| 6 | -0.855120000 | -1.195499000 | 2.769753000  |
| 1 | -1.854689000 | -0.747005000 | 2.916343000  |
| 1 | -0.876517000 | -2.147209000 | 3.323838000  |
| 6 | 0.217744000  | -0.308525000 | 3.364964000  |
| 1 | -0.005523000 | -0.037948000 | 4.408739000  |
| 1 | 1.167682000  | -0.850668000 | 3.355295000  |
| 7 | 0.401880000  | 0.895807000  | 2.523092000  |
| 6 | -1.281708000 | -2.399498000 | 0.719068000  |
| 6 | -0.824876000 | -2.894705000 | -0.521332000 |
| 6 | -2.476228000 | -2.947153000 | 1.230889000  |
| 6 | -1.547734000 | -3.841152000 | -1.230248000 |
| 1 | 0.125072000  | -2.538076000 | -0.916124000 |
| 6 | -3.187855000 | -3.904146000 | 0.515004000  |
| 1 | -2.863541000 | -2.607806000 | 2.187822000  |
| 6 | -2.742230000 | -4.354323000 | -0.723422000 |
| 1 | -1.159306000 | -4.198325000 | -2.182775000 |
| 1 | -4.111527000 | -4.299024000 | 0.935373000  |
| 1 | -3.304002000 | -5.102984000 | -1.276382000 |
| 6 | 3.165399000  | 0.154300000  | -0.348311000 |
| 6 | 3.233612000  | -1.216010000 | -0.681695000 |
| 6 | 4.182668000  | 0.991679000  | -0.854822000 |
| 6 | 4.238720000  | -1.712144000 | -1.497562000 |
| 1 | 2.472367000  | -1.883336000 | -0.276939000 |
| 6 | 5.194515000  | 0.481816000  | -1.659882000 |
| 1 | 4.161114000  | 2.056934000  | -0.635304000 |
| 6 | 5.232822000  | -0.869452000 | -1.994462000 |
| 1 | 4.255707000  | -2.774521000 | -1.733995000 |
| 1 | 5.959439000  | 1.156706000  | -2.040975000 |
| 1 | 6.027442000  | -1.261593000 | -2.624165000 |
| 6 | -2.011290000 | 2.015538000  | -0.623682000 |
| 6 | -2.807329000 | 1.008563000  | -1.207529000 |

|   |              |              |              |
|---|--------------|--------------|--------------|
| 6 | -2.202769000 | 3.335456000  | -1.078633000 |
| 6 | -3.707412000 | 1.297245000  | -2.223586000 |
| 1 | -2.737142000 | -0.003930000 | -0.806173000 |
| 6 | -3.115450000 | 3.618798000  | -2.087622000 |
| 1 | -1.611741000 | 4.140208000  | -0.645765000 |
| 6 | -3.867556000 | 2.605612000  | -2.676922000 |
| 1 | -4.312372000 | 0.496030000  | -2.644184000 |
| 1 | -3.234900000 | 4.647647000  | -2.423147000 |
| 1 | -4.581174000 | 2.833982000  | -3.464484000 |
| 7 | 0.853591000  | -0.806725000 | -2.613930000 |
| 7 | -0.106866000 | -0.148899000 | -1.763458000 |
| 1 | 0.699110000  | -0.507089000 | -3.575140000 |
| 1 | 1.772277000  | -0.465404000 | -2.344774000 |
| 1 | -0.962223000 | -0.696051000 | -1.849511000 |
| 1 | -0.350413000 | 0.776165000  | -2.125926000 |

Cartesian coordinates of  $[5c''_{PB}]-[14c''_{PB}]$ , along with their total energies (in hartree) including zero point vibrational correction at M06-L-D3(heptane)/6-311+G\* level of theory.

$[5c''_{PB}]_{alt}$  (TE = -3507.096581)

|   |              |              |             |
|---|--------------|--------------|-------------|
| 6 | -1.495518000 | 0.475696000  | 1.977352000 |
| 6 | -1.570112000 | 1.059471000  | 3.255232000 |
| 1 | -0.652409000 | 1.199750000  | 3.825422000 |
| 6 | -2.773288000 | 1.466605000  | 3.818915000 |
| 1 | -2.783570000 | 1.913528000  | 4.810755000 |
| 6 | -3.961446000 | 1.310083000  | 3.112127000 |
| 1 | -4.907903000 | 1.628993000  | 3.541828000 |
| 6 | -3.923885000 | 0.753822000  | 1.840720000 |
| 1 | -4.851795000 | 0.652008000  | 1.280891000 |
| 6 | -2.711567000 | 0.343422000  | 1.274646000 |
| 6 | 0.319297000  | -1.558876000 | 1.773746000 |
| 6 | -0.243656000 | -2.216016000 | 2.881596000 |
| 1 | -1.085834000 | -1.753901000 | 3.396206000 |
| 6 | 0.268836000  | -3.414316000 | 3.364859000 |
| 1 | -0.186207000 | -3.889522000 | 4.231381000 |
| 6 | 1.381521000  | -3.992590000 | 2.760233000 |
| 1 | 1.804749000  | -4.914678000 | 3.151097000 |
| 6 | 1.940689000  | -3.389468000 | 1.638556000 |
| 1 | 2.802358000  | -3.852328000 | 1.161378000 |
| 6 | 1.402707000  | -2.204738000 | 1.128394000 |
| 6 | 1.158812000  | 0.952711000  | 1.756183000 |
| 6 | 1.844404000  | 0.808513000  | 2.977306000 |
| 1 | 1.571595000  | -0.012980000 | 3.640739000 |
| 6 | 2.864926000  | 1.668158000  | 3.362235000 |
| 1 | 3.367580000  | 1.521762000  | 4.316013000 |
| 6 | 3.254267000  | 2.705608000  | 2.520236000 |

|    |              |              |              |
|----|--------------|--------------|--------------|
| 1  | 4.058012000  | 3.379354000  | 2.806864000  |
| 6  | 2.616600000  | 2.861994000  | 1.297867000  |
| 1  | 2.941736000  | 3.657688000  | 0.632093000  |
| 6  | 1.578635000  | 2.001893000  | 0.914809000  |
| 23 | -0.176911000 | -0.183813000 | -1.124571000 |
| 6  | -3.474027000 | -1.933405000 | -0.419655000 |
| 1  | -4.513600000 | -1.727578000 | -0.129138000 |
| 6  | 3.764532000  | -1.363061000 | -0.451803000 |
| 1  | 4.111948000  | -2.382545000 | -0.226959000 |
| 6  | -0.233714000 | 3.665763000  | -0.721560000 |
| 1  | -0.370041000 | 3.914333000  | -1.786312000 |
| 6  | 0.359443000  | 4.861673000  | 0.013652000  |
| 1  | -0.333302000 | 5.707021000  | -0.052664000 |
| 1  | 0.490137000  | 4.639273000  | 1.076599000  |
| 1  | 1.317342000  | 5.202043000  | -0.375588000 |
| 6  | -1.591011000 | 3.340472000  | -0.115738000 |
| 1  | -1.504980000 | 3.089142000  | 0.946579000  |
| 1  | -2.265543000 | 4.199096000  | -0.194370000 |
| 1  | -2.066377000 | 2.496072000  | -0.611058000 |
| 6  | -3.467314000 | -2.572339000 | -1.804166000 |
| 1  | -3.873792000 | -1.920132000 | -2.581798000 |
| 1  | -2.461136000 | -2.851700000 | -2.125233000 |
| 1  | -4.070348000 | -3.485870000 | -1.801996000 |
| 6  | -2.861253000 | -2.841243000 | 0.635308000  |
| 1  | -2.945580000 | -2.418140000 | 1.639587000  |
| 1  | -3.368720000 | -3.811253000 | 0.639462000  |
| 1  | -1.799311000 | -3.031039000 | 0.454844000  |
| 6  | 4.301697000  | -0.954174000 | -1.816867000 |
| 1  | 5.395051000  | -0.996723000 | -1.824943000 |
| 1  | 3.947073000  | -1.594655000 | -2.630005000 |
| 1  | 4.021347000  | 0.074386000  | -2.063881000 |
| 6  | 4.246860000  | -0.439863000 | 0.654814000  |
| 1  | 3.925472000  | 0.593656000  | 0.492856000  |
| 1  | 3.879116000  | -0.744315000 | 1.637967000  |
| 1  | 5.340775000  | -0.438985000 | 0.694753000  |
| 5  | -0.066032000 | -0.042426000 | 1.489990000  |
| 7  | -0.685275000 | -1.430542000 | -3.833526000 |
| 7  | -0.409387000 | -0.376433000 | -3.164629000 |
| 1  | -0.828939000 | -1.195731000 | -4.828899000 |
| 15 | 0.819857000  | 2.116810000  | -0.737097000 |
| 15 | -2.650168000 | -0.260300000 | -0.442473000 |
| 15 | 1.915372000  | -1.518915000 | -0.481537000 |
| 6  | 2.262878000  | 2.449222000  | -1.905168000 |
| 1  | 3.098966000  | 1.941342000  | -1.402037000 |
| 6  | 2.656955000  | 3.902208000  | -2.141338000 |
| 1  | 3.470853000  | 3.942939000  | -2.872411000 |

|   |              |              |              |
|---|--------------|--------------|--------------|
| 1 | 1.833168000  | 4.492650000  | -2.554312000 |
| 1 | 3.015844000  | 4.409717000  | -1.245690000 |
| 6 | 2.028757000  | 1.764599000  | -3.247822000 |
| 1 | 1.900299000  | 0.683143000  | -3.148807000 |
| 1 | 1.145673000  | 2.170119000  | -3.759032000 |
| 1 | 2.879282000  | 1.930518000  | -3.916696000 |
| 6 | 1.607042000  | -2.904722000 | -1.706137000 |
| 1 | 1.656684000  | -2.395079000 | -2.680593000 |
| 6 | 0.178317000  | -3.388698000 | -1.505141000 |
| 1 | -0.553382000 | -2.567427000 | -1.444762000 |
| 1 | -0.156721000 | -4.009235000 | -2.340738000 |
| 1 | 0.077330000  | -3.963623000 | -0.579129000 |
| 6 | 2.578537000  | -4.074493000 | -1.723938000 |
| 1 | 2.314811000  | -4.761686000 | -2.534850000 |
| 1 | 3.615168000  | -3.771859000 | -1.889793000 |
| 1 | 2.539672000  | -4.654377000 | -0.798232000 |
| 6 | -3.873319000 | 0.834351000  | -1.378701000 |
| 1 | -3.901711000 | 1.745015000  | -0.767560000 |
| 6 | -5.304471000 | 0.317428000  | -1.476329000 |
| 1 | -5.933709000 | 1.084131000  | -1.939636000 |
| 1 | -5.392021000 | -0.577987000 | -2.096247000 |
| 1 | -5.749318000 | 0.088181000  | -0.505546000 |
| 6 | -3.332881000 | 1.203087000  | -2.755613000 |
| 1 | -2.347755000 | 1.680818000  | -2.694706000 |
| 1 | -3.234402000 | 0.324907000  | -3.403146000 |
| 1 | -4.006802000 | 1.902796000  | -3.260038000 |
| 1 | -0.380477000 | 0.491041000  | -3.724497000 |

$[5c''_{PB}]_{dis}$  (TE = -3507.115363)

|   |              |              |             |
|---|--------------|--------------|-------------|
| 6 | -1.367274000 | 0.849906000  | 1.929672000 |
| 6 | -1.501373000 | 1.723303000  | 3.025512000 |
| 1 | -0.604175000 | 2.111885000  | 3.506713000 |
| 6 | -2.743273000 | 2.095479000  | 3.525507000 |
| 1 | -2.806654000 | 2.764184000  | 4.380844000 |
| 6 | -3.899695000 | 1.619676000  | 2.919347000 |
| 1 | -4.878748000 | 1.906502000  | 3.295462000 |
| 6 | -3.796587000 | 0.790801000  | 1.808647000 |
| 1 | -4.708938000 | 0.454984000  | 1.321619000 |
| 6 | -2.550837000 | 0.401364000  | 1.306515000 |
| 6 | 0.552212000  | -1.073747000 | 2.082102000 |
| 6 | 0.150917000  | -1.456855000 | 3.373905000 |
| 1 | -0.573726000 | -0.841805000 | 3.907152000 |
| 6 | 0.661578000  | -2.589213000 | 3.998723000 |
| 1 | 0.330310000  | -2.852049000 | 5.000749000 |
| 6 | 1.591953000  | -3.382204000 | 3.338575000 |
| 1 | 2.000650000  | -4.268542000 | 3.817464000 |

|    |              |              |              |
|----|--------------|--------------|--------------|
| 6  | 1.986183000  | -3.043984000 | 2.048330000  |
| 1  | 2.698601000  | -3.682033000 | 1.531617000  |
| 6  | 1.473425000  | -1.911378000 | 1.410653000  |
| 6  | 1.224118000  | 1.487891000  | 1.593386000  |
| 6  | 2.022740000  | 1.636128000  | 2.739311000  |
| 1  | 1.910306000  | 0.928800000  | 3.561675000  |
| 6  | 2.965845000  | 2.651323000  | 2.846472000  |
| 1  | 3.569810000  | 2.738549000  | 3.746855000  |
| 6  | 3.154642000  | 3.537583000  | 1.791110000  |
| 1  | 3.906174000  | 4.320456000  | 1.857091000  |
| 6  | 2.386897000  | 3.405490000  | 0.640045000  |
| 1  | 2.558814000  | 4.083629000  | -0.193146000 |
| 6  | 1.416656000  | 2.402665000  | 0.539770000  |
| 23 | -0.202745000 | -0.375525000 | -1.379169000 |
| 6  | -3.097557000 | -2.230838000 | 0.165307000  |
| 1  | -4.125496000 | -2.046874000 | 0.507006000  |
| 6  | 3.685215000  | -1.147972000 | -0.363117000 |
| 1  | 4.155874000  | -2.073247000 | -0.001641000 |
| 6  | -0.628071000 | 3.557497000  | -1.282611000 |
| 1  | -0.838300000 | 3.518948000  | -2.363316000 |
| 6  | -0.053419000 | 4.921262000  | -0.923151000 |
| 1  | -0.788852000 | 5.699280000  | -1.152962000 |
| 1  | 0.156927000  | 4.988676000  | 0.148382000  |
| 1  | 0.859941000  | 5.176468000  | -1.459843000 |
| 6  | -1.931031000 | 3.339080000  | -0.526581000 |
| 1  | -1.774174000 | 3.356356000  | 0.557149000  |
| 1  | -2.650511000 | 4.128981000  | -0.764184000 |
| 1  | -2.389914000 | 2.381991000  | -0.772774000 |
| 6  | -3.141026000 | -3.136693000 | -1.059508000 |
| 1  | -3.585337000 | -2.661426000 | -1.937990000 |
| 1  | -2.138948000 | -3.457976000 | -1.348557000 |
| 1  | -3.722652000 | -4.039065000 | -0.845204000 |
| 6  | -2.328126000 | -2.868944000 | 1.311771000  |
| 1  | -2.362226000 | -2.260698000 | 2.219660000  |
| 1  | -2.753309000 | -3.848594000 | 1.553692000  |
| 1  | -1.273005000 | -3.023999000 | 1.064997000  |
| 6  | 4.165409000  | -0.873163000 | -1.783717000 |
| 1  | 5.259205000  | -0.869788000 | -1.823045000 |
| 1  | 3.818265000  | -1.607019000 | -2.516896000 |
| 1  | 3.835166000  | 0.110671000  | -2.129237000 |
| 6  | 4.082815000  | -0.030510000 | 0.583889000  |
| 1  | 3.660138000  | 0.933931000  | 0.287013000  |
| 1  | 3.767457000  | -0.226586000 | 1.611434000  |
| 1  | 5.171999000  | 0.082315000  | 0.588944000  |
| 5  | 0.107047000  | 0.373722000  | 1.647167000  |
| 7  | -0.858926000 | -2.091291000 | -3.774926000 |

|    |              |              |              |
|----|--------------|--------------|--------------|
| 7  | -0.719413000 | -1.403532000 | -2.648037000 |
| 1  | -1.626453000 | -1.788925000 | -4.372002000 |
| 15 | 0.501855000  | 2.094308000  | -1.008186000 |
| 15 | -2.436046000 | -0.540808000 | -0.263458000 |
| 15 | 1.861538000  | -1.555012000 | -0.341240000 |
| 6  | 1.816273000  | 2.151290000  | -2.353888000 |
| 1  | 2.729776000  | 1.854540000  | -1.820044000 |
| 6  | 2.075881000  | 3.478680000  | -3.048630000 |
| 1  | 2.799643000  | 3.335518000  | -3.857990000 |
| 1  | 1.171738000  | 3.895186000  | -3.503252000 |
| 1  | 2.494835000  | 4.234365000  | -2.381895000 |
| 6  | 1.481723000  | 1.065406000  | -3.374307000 |
| 1  | 1.469320000  | 0.052363000  | -2.934085000 |
| 1  | 0.512996000  | 1.231198000  | -3.858271000 |
| 1  | 2.234888000  | 1.016205000  | -4.168176000 |
| 6  | 1.862176000  | -3.204635000 | -1.264833000 |
| 1  | 1.739009000  | -2.868495000 | -2.305737000 |
| 6  | 0.633496000  | -4.023044000 | -0.899223000 |
| 1  | -0.274038000 | -3.419504000 | -0.937228000 |
| 1  | 0.510645000  | -4.862719000 | -1.591655000 |
| 1  | 0.709130000  | -4.443761000 | 0.108199000  |
| 6  | 3.117479000  | -4.068559000 | -1.202436000 |
| 1  | 2.972977000  | -4.950293000 | -1.835682000 |
| 1  | 4.017518000  | -3.568315000 | -1.563221000 |
| 1  | 3.327015000  | -4.444614000 | -0.197657000 |
| 6  | -3.839188000 | 0.224954000  | -1.292032000 |
| 1  | -3.945303000 | 1.220358000  | -0.843699000 |
| 6  | -5.205965000 | -0.448576000 | -1.199937000 |
| 1  | -5.942651000 | 0.161398000  | -1.732946000 |
| 1  | -5.223948000 | -1.437048000 | -1.664652000 |
| 1  | -5.574565000 | -0.563936000 | -0.178653000 |
| 6  | -3.444179000 | 0.413172000  | -2.751392000 |
| 1  | -2.503612000 | 0.961925000  | -2.866679000 |
| 1  | -3.323619000 | -0.547017000 | -3.263293000 |
| 1  | -4.223292000 | 0.968032000  | -3.284588000 |
| 1  | -0.854114000 | -3.104205000 | -3.660295000 |

[6c''<sub>PB</sub>]<sub>atl</sub> (TE = -3507.237814)

|   |              |             |             |
|---|--------------|-------------|-------------|
| 6 | -0.284574000 | 1.549541000 | 1.838538000 |
| 6 | 0.315302000  | 2.175650000 | 2.946648000 |
| 1 | 1.157103000  | 1.682387000 | 3.433432000 |
| 6 | -0.127742000 | 3.395118000 | 3.447860000 |
| 1 | 0.370645000  | 3.846029000 | 4.304552000 |
| 6 | -1.213990000 | 4.029553000 | 2.856294000 |
| 1 | -1.581452000 | 4.977924000 | 3.243101000 |
| 6 | -1.816008000 | 3.447924000 | 1.745422000 |

|    |              |              |              |
|----|--------------|--------------|--------------|
| 1  | -2.649332000 | 3.964068000  | 1.276643000  |
| 6  | -1.353977000 | 2.238103000  | 1.217860000  |
| 6  | -0.758469000 | -1.109346000 | 1.956651000  |
| 6  | -1.334603000 | -1.003368000 | 3.234724000  |
| 1  | -1.213193000 | -0.071100000 | 3.788288000  |
| 6  | -2.055104000 | -2.040672000 | 3.817139000  |
| 1  | -2.489727000 | -1.912455000 | 4.807266000  |
| 6  | -2.218133000 | -3.242577000 | 3.135247000  |
| 1  | -2.776648000 | -4.062033000 | 3.582950000  |
| 6  | -1.668456000 | -3.381128000 | 1.865813000  |
| 1  | -1.808136000 | -4.316536000 | 1.326678000  |
| 6  | -0.962484000 | -2.330905000 | 1.269726000  |
| 6  | 1.750468000  | -0.218088000 | 1.660655000  |
| 6  | 2.151284000  | -0.802946000 | 2.875794000  |
| 1  | 1.385044000  | -1.067500000 | 3.605515000  |
| 6  | 3.479769000  | -1.080922000 | 3.172013000  |
| 1  | 3.742920000  | -1.542469000 | 4.122414000  |
| 6  | 4.468514000  | -0.784138000 | 2.239917000  |
| 1  | 5.512415000  | -1.011915000 | 2.446141000  |
| 6  | 4.108518000  | -0.200681000 | 1.031512000  |
| 1  | 4.889003000  | 0.008939000  | 0.304541000  |
| 6  | 2.770806000  | 0.090603000  | 0.734702000  |
| 23 | -0.134798000 | -0.008097000 | -1.171893000 |
| 6  | -3.764303000 | 1.181336000  | -0.064770000 |
| 1  | -4.233202000 | 2.112973000  | 0.285661000  |
| 6  | 1.020841000  | -3.651599000 | -0.472109000 |
| 1  | 0.545440000  | -4.615769000 | -0.245557000 |
| 6  | 2.674206000  | 2.598132000  | -0.861763000 |
| 1  | 3.236370000  | 2.773570000  | -1.788478000 |
| 6  | 3.539176000  | 3.008964000  | 0.320816000  |
| 1  | 3.780378000  | 4.076769000  | 0.264425000  |
| 1  | 3.016308000  | 2.841380000  | 1.268697000  |
| 1  | 4.483040000  | 2.460936000  | 0.376721000  |
| 6  | 1.412562000  | 3.444196000  | -0.923182000 |
| 1  | 0.792879000  | 3.308836000  | -0.030725000 |
| 1  | 1.663541000  | 4.509462000  | -0.989413000 |
| 1  | 0.797459000  | 3.191029000  | -1.791861000 |
| 6  | -4.450172000 | 0.734472000  | -1.352467000 |
| 1  | -4.580725000 | 1.552965000  | -2.064407000 |
| 1  | -3.880707000 | -0.037782000 | -1.876725000 |
| 1  | -5.445701000 | 0.328081000  | -1.141130000 |
| 6  | -3.886962000 | 0.147815000  | 1.044811000  |
| 1  | -3.454256000 | 0.505293000  | 1.983514000  |
| 1  | -4.940069000 | -0.091184000 | 1.231806000  |
| 1  | -3.377436000 | -0.787581000 | 0.796484000  |
| 6  | 1.627464000  | -3.702538000 | -1.868747000 |

|    |              |              |              |
|----|--------------|--------------|--------------|
| 1  | 2.365208000  | -4.508487000 | -1.950611000 |
| 1  | 0.885141000  | -3.855425000 | -2.659276000 |
| 1  | 2.146144000  | -2.762526000 | -2.091533000 |
| 6  | 2.090195000  | -3.401685000 | 0.575566000  |
| 1  | 2.648077000  | -2.483247000 | 0.374595000  |
| 1  | 1.675897000  | -3.316836000 | 1.583667000  |
| 1  | 2.812238000  | -4.226336000 | 0.580408000  |
| 5  | 0.194529000  | 0.078711000  | 1.452527000  |
| 7  | -1.658543000 | -0.545356000 | -3.658691000 |
| 7  | -0.496100000 | -0.223271000 | -3.160603000 |
| 1  | -1.589746000 | -0.587774000 | -4.689035000 |
| 15 | 2.264514000  | 0.747370000  | -0.904665000 |
| 15 | -1.967969000 | 1.592760000  | -0.392192000 |
| 15 | -0.367257000 | -2.396823000 | -0.453888000 |
| 6  | 3.591829000  | 0.069006000  | -2.066547000 |
| 1  | 3.825382000  | -0.913110000 | -1.628303000 |
| 6  | 4.887152000  | 0.864620000  | -2.203763000 |
| 1  | 5.648121000  | 0.262621000  | -2.712950000 |
| 1  | 4.744686000  | 1.761581000  | -2.814827000 |
| 1  | 5.315310000  | 1.191387000  | -1.253990000 |
| 6  | 2.989604000  | -0.157698000 | -3.448734000 |
| 1  | 2.161814000  | -0.871828000 | -3.419455000 |
| 1  | 2.607924000  | 0.779265000  | -3.876301000 |
| 1  | 3.738486000  | -0.545865000 | -4.148427000 |
| 6  | -1.653846000 | -3.294996000 | -1.497520000 |
| 1  | -1.388889000 | -2.954093000 | -2.509927000 |
| 6  | -3.046769000 | -2.759484000 | -1.210755000 |
| 1  | -3.063756000 | -1.670700000 | -1.249682000 |
| 1  | -3.760907000 | -3.124844000 | -1.956654000 |
| 1  | -3.410567000 | -3.067423000 | -0.224567000 |
| 6  | -1.647523000 | -4.819536000 | -1.497612000 |
| 1  | -2.436494000 | -5.186615000 | -2.164058000 |
| 1  | -0.709537000 | -5.252251000 | -1.852809000 |
| 1  | -1.852619000 | -5.245205000 | -0.510459000 |
| 6  | -2.104624000 | 3.163151000  | -1.447369000 |
| 1  | -1.271175000 | 3.772290000  | -1.073577000 |
| 6  | -3.377260000 | 3.997046000  | -1.322067000 |
| 1  | -3.251732000 | 4.936970000  | -1.871641000 |
| 1  | -4.245863000 | 3.497065000  | -1.758073000 |
| 1  | -3.640910000 | 4.264806000  | -0.297886000 |
| 6  | -1.845267000 | 2.853047000  | -2.917271000 |
| 1  | -0.883311000 | 2.355998000  | -3.069345000 |
| 1  | -2.609967000 | 2.188867000  | -3.334002000 |
| 1  | -1.849237000 | 3.774181000  | -3.511513000 |
| 1  | 0.240182000  | -0.095973000 | -3.868540000 |



[6c''<sub>pg</sub>]<sub>dis</sub> (TE = -3507.269012)

|    |              |              |              |
|----|--------------|--------------|--------------|
| 6  | -1.508997000 | 0.523736000  | 1.928466000  |
| 6  | -1.681433000 | 1.240955000  | 3.126699000  |
| 1  | -0.797232000 | 1.550577000  | 3.684553000  |
| 6  | -2.935641000 | 1.579237000  | 3.623071000  |
| 1  | -3.020110000 | 2.139507000  | 4.552829000  |
| 6  | -4.080033000 | 1.206900000  | 2.925444000  |
| 1  | -5.067538000 | 1.469308000  | 3.299546000  |
| 6  | -3.947025000 | 0.508653000  | 1.731054000  |
| 1  | -4.843966000 | 0.241065000  | 1.176033000  |
| 6  | -2.685171000 | 0.174091000  | 1.227717000  |
| 6  | 0.536270000  | -1.285955000 | 1.983676000  |
| 6  | 0.134161000  | -1.782234000 | 3.235810000  |
| 1  | -0.652869000 | -1.257853000 | 3.779357000  |
| 6  | 0.706387000  | -2.913719000 | 3.807424000  |
| 1  | 0.359603000  | -3.268721000 | 4.776728000  |
| 6  | 1.729411000  | -3.584751000 | 3.145090000  |
| 1  | 2.192489000  | -4.464431000 | 3.587402000  |
| 6  | 2.145037000  | -3.126569000 | 1.898938000  |
| 1  | 2.934373000  | -3.662547000 | 1.375369000  |
| 6  | 1.548673000  | -2.009508000 | 1.306105000  |
| 6  | 1.055513000  | 1.304134000  | 1.680124000  |
| 6  | 1.772016000  | 1.346702000  | 2.890938000  |
| 1  | 1.613488000  | 0.551526000  | 3.620622000  |
| 6  | 2.691285000  | 2.346404000  | 3.181786000  |
| 1  | 3.228965000  | 2.334628000  | 4.128574000  |
| 6  | 2.935125000  | 3.351930000  | 2.251538000  |
| 1  | 3.663313000  | 4.133788000  | 2.457374000  |
| 6  | 2.245887000  | 3.340814000  | 1.046024000  |
| 1  | 2.454999000  | 4.119970000  | 0.318614000  |
| 6  | 1.313396000  | 2.337183000  | 0.752525000  |
| 23 | -0.130076000 | -0.264436000 | -1.189543000 |
| 6  | -3.045700000 | -2.362810000 | -0.175072000 |
| 1  | -4.102676000 | -2.302813000 | 0.121349000  |
| 6  | 3.701836000  | -0.995828000 | -0.446660000 |
| 1  | 4.261998000  | -1.899052000 | -0.166116000 |
| 6  | -0.734091000 | 3.629232000  | -0.954315000 |
| 1  | -0.778006000 | 3.876852000  | -2.026547000 |
| 6  | -0.337260000 | 4.871817000  | -0.168687000 |
| 1  | -1.087786000 | 5.658317000  | -0.309294000 |
| 1  | -0.291481000 | 4.657318000  | 0.903789000  |
| 1  | 0.626970000  | 5.290642000  | -0.458846000 |
| 6  | -2.115676000 | 3.170255000  | -0.519522000 |
| 1  | -2.130622000 | 2.872082000  | 0.533954000  |
| 1  | -2.849804000 | 3.974821000  | -0.642475000 |
| 1  | -2.452140000 | 2.315972000  | -1.106119000 |

|    |              |              |              |
|----|--------------|--------------|--------------|
| 6  | -2.938712000 | -3.133865000 | -1.484638000 |
| 1  | -3.545763000 | -2.703452000 | -2.285768000 |
| 1  | -1.906504000 | -3.146997000 | -1.843044000 |
| 1  | -3.257767000 | -4.174044000 | -1.354585000 |
| 6  | -2.277025000 | -3.045858000 | 0.945814000  |
| 1  | -2.394371000 | -2.524275000 | 1.899899000  |
| 1  | -2.631252000 | -4.074020000 | 1.081971000  |
| 1  | -1.203524000 | -3.092820000 | 0.740218000  |
| 6  | 4.087774000  | -0.585614000 | -1.862797000 |
| 1  | 5.159900000  | -0.369545000 | -1.929842000 |
| 1  | 3.858872000  | -1.347673000 | -2.613706000 |
| 1  | 3.553257000  | 0.322106000  | -2.162022000 |
| 6  | 4.042248000  | 0.093129000  | 0.553743000  |
| 1  | 3.540308000  | 1.035101000  | 0.316443000  |
| 1  | 3.758527000  | -0.176680000 | 1.574329000  |
| 1  | 5.120778000  | 0.288701000  | 0.547965000  |
| 5  | -0.018822000 | 0.129981000  | 1.495188000  |
| 7  | -0.135753000 | -1.676694000 | -3.906298000 |
| 7  | -0.209633000 | -1.006896000 | -2.725904000 |
| 1  | -0.402094000 | -1.081158000 | -4.692023000 |
| 15 | 0.495349000  | 2.202789000  | -0.879579000 |
| 15 | -2.474237000 | -0.596994000 | -0.417178000 |
| 15 | 1.902359000  | -1.505920000 | -0.419805000 |
| 6  | 1.803081000  | 2.704161000  | -2.145060000 |
| 1  | 2.725596000  | 2.269215000  | -1.731851000 |
| 6  | 2.044117000  | 4.188374000  | -2.397092000 |
| 1  | 2.800060000  | 4.309076000  | -3.181355000 |
| 1  | 1.142567000  | 4.697304000  | -2.753089000 |
| 1  | 2.408511000  | 4.733971000  | -1.525492000 |
| 6  | 1.493642000  | 2.013435000  | -3.471555000 |
| 1  | 1.407251000  | 0.928749000  | -3.366430000 |
| 1  | 0.545396000  | 2.370713000  | -3.893855000 |
| 1  | 2.274040000  | 2.228850000  | -4.210228000 |
| 6  | 1.998677000  | -3.087476000 | -1.445744000 |
| 1  | 1.862210000  | -2.688598000 | -2.461274000 |
| 6  | 0.809021000  | -3.988019000 | -1.154754000 |
| 1  | -0.125725000 | -3.427644000 | -1.183594000 |
| 1  | 0.741678000  | -4.792975000 | -1.895710000 |
| 1  | 0.882049000  | -4.456404000 | -0.167100000 |
| 6  | 3.290040000  | -3.897967000 | -1.423486000 |
| 1  | 3.195007000  | -4.747832000 | -2.109398000 |
| 1  | 4.169156000  | -3.334994000 | -1.743715000 |
| 1  | 3.509818000  | -4.321059000 | -0.438787000 |
| 6  | -3.878367000 | 0.135478000  | -1.457549000 |
| 1  | -4.027828000 | 1.124095000  | -1.005111000 |
| 6  | -5.227382000 | -0.576306000 | -1.424377000 |

|   |              |              |              |
|---|--------------|--------------|--------------|
| 1 | -5.971118000 | 0.020311000  | -1.964779000 |
| 1 | -5.199683000 | -1.554592000 | -1.911588000 |
| 1 | -5.617109000 | -0.730007000 | -0.415379000 |
| 6 | -3.416306000 | 0.335597000  | -2.897511000 |
| 1 | -2.490220000 | 0.917352000  | -2.957204000 |
| 1 | -3.212422000 | -0.620796000 | -3.391909000 |
| 1 | -4.184723000 | 0.851357000  | -3.484966000 |
| 1 | -0.744024000 | -2.497587000 | -3.915352000 |

[7c''<sub>PB</sub>]<sub>dis</sub> (TE = -3507.777762)

|    |              |              |              |
|----|--------------|--------------|--------------|
| 6  | 1.328621000  | -0.823942000 | 1.925655000  |
| 6  | 1.299690000  | -1.621519000 | 3.084602000  |
| 1  | 0.347339000  | -1.782942000 | 3.588109000  |
| 6  | 2.440825000  | -2.212408000 | 3.613597000  |
| 1  | 2.369837000  | -2.822022000 | 4.511870000  |
| 6  | 3.669263000  | -2.028247000 | 2.989433000  |
| 1  | 4.569471000  | -2.487969000 | 3.390002000  |
| 6  | 3.733482000  | -1.265635000 | 1.830402000  |
| 1  | 4.692382000  | -1.154213000 | 1.331964000  |
| 6  | 2.584642000  | -0.673508000 | 1.294438000  |
| 6  | -0.279722000 | 1.401168000  | 1.902738000  |
| 6  | 0.249996000  | 1.876716000  | 3.114754000  |
| 1  | 0.965593000  | 1.256871000  | 3.655482000  |
| 6  | -0.129833000 | 3.098881000  | 3.655885000  |
| 1  | 0.297733000  | 3.431661000  | 4.599452000  |
| 6  | -1.070835000 | 3.889996000  | 3.002106000  |
| 1  | -1.384170000 | 4.839936000  | 3.428218000  |
| 6  | -1.605799000 | 3.457407000  | 1.794194000  |
| 1  | -2.342736000 | 4.077438000  | 1.288026000  |
| 6  | -1.206481000 | 2.238554000  | 1.236521000  |
| 6  | -1.346047000 | -1.006426000 | 1.664847000  |
| 6  | -2.059032000 | -0.893529000 | 2.872588000  |
| 1  | -1.738341000 | -0.153316000 | 3.606543000  |
| 6  | -3.163313000 | -1.685658000 | 3.156952000  |
| 1  | -3.687129000 | -1.570203000 | 4.103549000  |
| 6  | -3.609539000 | -2.613420000 | 2.220361000  |
| 1  | -4.482588000 | -3.228723000 | 2.423843000  |
| 6  | -2.939835000 | -2.735768000 | 1.010856000  |
| 1  | -3.316708000 | -3.441164000 | 0.274792000  |
| 6  | -1.813818000 | -1.950161000 | 0.732553000  |
| 23 | 0.187503000  | 0.223833000  | -1.146947000 |
| 6  | 3.530449000  | 1.787694000  | 0.011802000  |
| 1  | 4.518971000  | 1.461009000  | 0.363742000  |
| 6  | -3.603507000 | 1.666337000  | -0.416492000 |
| 1  | -3.881600000 | 2.707200000  | -0.192822000 |
| 6  | 0.043129000  | -3.599986000 | -0.930571000 |

|    |              |              |              |
|----|--------------|--------------|--------------|
| 1  | -0.217643000 | -4.058614000 | -1.893100000 |
| 6  | -0.301784000 | -4.570247000 | 0.190137000  |
| 1  | 0.286256000  | -5.487567000 | 0.082636000  |
| 1  | -0.067831000 | -4.142730000 | 1.170706000  |
| 1  | -1.355131000 | -4.857976000 | 0.207211000  |
| 6  | 1.533237000  | -3.302511000 | -0.946054000 |
| 1  | 1.860826000  | -2.838743000 | -0.010145000 |
| 1  | 2.108149000  | -4.226770000 | -1.067052000 |
| 1  | 1.806291000  | -2.637250000 | -1.769917000 |
| 6  | 3.720111000  | 2.621753000  | -1.250145000 |
| 1  | 4.113609000  | 2.053220000  | -2.096352000 |
| 1  | 2.784963000  | 3.088170000  | -1.572134000 |
| 1  | 4.422139000  | 3.439689000  | -1.059985000 |
| 6  | 2.881242000  | 2.593225000  | 1.123745000  |
| 1  | 2.818077000  | 2.028019000  | 2.056438000  |
| 1  | 3.464429000  | 3.498234000  | 1.323160000  |
| 1  | 1.865287000  | 2.910054000  | 0.868844000  |
| 6  | -4.134153000 | 1.299580000  | -1.795708000 |
| 1  | -5.222508000 | 1.408326000  | -1.827821000 |
| 1  | -3.722642000 | 1.920107000  | -2.597507000 |
| 1  | -3.909255000 | 0.256602000  | -2.039915000 |
| 6  | -4.180197000 | 0.778051000  | 0.672387000  |
| 1  | -3.948906000 | -0.277659000 | 0.504195000  |
| 1  | -3.805958000 | 1.041839000  | 1.664639000  |
| 1  | -5.270509000 | 0.874044000  | 0.692775000  |
| 5  | -0.033420000 | -0.116272000 | 1.494084000  |
| 7  | 0.795255000  | 1.524268000  | -3.889260000 |
| 7  | 0.377567000  | 0.486793000  | -3.039441000 |
| 1  | 1.342740000  | 1.150203000  | -4.664405000 |
| 15 | -0.971425000 | -2.014752000 | -0.885138000 |
| 15 | 2.632828000  | 0.180117000  | -0.319541000 |
| 15 | -1.747016000 | 1.697984000  | -0.418923000 |
| 6  | -2.390814000 | -2.336359000 | -2.083214000 |
| 1  | -3.241821000 | -1.859364000 | -1.575586000 |
| 6  | -2.731630000 | -3.803862000 | -2.326573000 |
| 1  | -3.702150000 | -3.878712000 | -2.827097000 |
| 1  | -2.003890000 | -4.282501000 | -2.988418000 |
| 1  | -2.788146000 | -4.407906000 | -1.419408000 |
| 6  | -2.176427000 | -1.635311000 | -3.417928000 |
| 1  | -2.069713000 | -0.552642000 | -3.309938000 |
| 1  | -1.286737000 | -2.021237000 | -3.932963000 |
| 1  | -3.023624000 | -1.815956000 | -4.087433000 |
| 6  | -1.346588000 | 3.104843000  | -1.590734000 |
| 1  | -1.420304000 | 2.625238000  | -2.577988000 |
| 6  | 0.109410000  | 3.487401000  | -1.371307000 |
| 1  | 0.775296000  | 2.610260000  | -1.299617000 |

|   |              |              |              |
|---|--------------|--------------|--------------|
| 1 | 0.490190000  | 4.110556000  | -2.187179000 |
| 1 | 0.248190000  | 4.036432000  | -0.434507000 |
| 6 | -2.240925000 | 4.334593000  | -1.584827000 |
| 1 | -1.918912000 | 5.028916000  | -2.368186000 |
| 1 | -3.289390000 | 4.100845000  | -1.783443000 |
| 1 | -2.190305000 | 4.883033000  | -0.640673000 |
| 6 | 3.881955000  | -0.782603000 | -1.358354000 |
| 1 | 3.757909000  | -1.809756000 | -0.991987000 |
| 6 | 5.349536000  | -0.398713000 | -1.181785000 |
| 1 | 5.975435000  | -1.119324000 | -1.717769000 |
| 1 | 5.576354000  | 0.584242000  | -1.602737000 |
| 1 | 5.691024000  | -0.393783000 | -0.145605000 |
| 6 | 3.525202000  | -0.756420000 | -2.841263000 |
| 1 | 2.497061000  | -1.070190000 | -3.034214000 |
| 1 | 3.637539000  | 0.246464000  | -3.267532000 |
| 1 | 4.193930000  | -1.416475000 | -3.402852000 |
| 1 | 0.023808000  | -0.250368000 | -3.647779000 |
| 1 | 1.413715000  | 2.143220000  | -3.371418000 |

[7c''<sub>PB</sub>]<sub>dis</sub> (TE = -3507.749426)

|   |              |              |             |
|---|--------------|--------------|-------------|
| 6 | -1.331320000 | 0.821132000  | 1.953798000 |
| 6 | -1.344952000 | 1.621868000  | 3.109982000 |
| 1 | -0.402996000 | 1.843480000  | 3.610515000 |
| 6 | -2.521008000 | 2.141539000  | 3.638394000 |
| 1 | -2.487752000 | 2.758084000  | 4.534168000 |
| 6 | -3.735866000 | 1.879332000  | 3.015282000 |
| 1 | -4.662299000 | 2.284034000  | 3.415770000 |
| 6 | -3.753937000 | 1.111330000  | 1.857716000 |
| 1 | -4.704317000 | 0.939433000  | 1.359523000 |
| 6 | -2.571256000 | 0.589560000  | 1.323739000 |
| 6 | 0.368775000  | -1.309080000 | 1.997485000 |
| 6 | -0.089464000 | -1.708132000 | 3.264032000 |
| 1 | -0.775554000 | -1.056540000 | 3.805561000 |
| 6 | 0.313065000  | -2.901511000 | 3.853459000 |
| 1 | -0.065508000 | -3.177170000 | 4.835607000 |
| 6 | 1.205140000  | -3.737490000 | 3.190578000 |
| 1 | 1.533177000  | -4.668554000 | 3.646564000 |
| 6 | 1.667204000  | -3.377955000 | 1.929139000 |
| 1 | 2.355434000  | -4.041312000 | 1.410574000 |
| 6 | 1.246759000  | -2.189838000 | 1.324439000 |
| 6 | 1.313822000  | 1.155009000  | 1.630693000 |
| 6 | 2.049267000  | 1.104498000  | 2.828871000 |
| 1 | 1.792763000  | 0.350600000  | 3.573596000 |
| 6 | 3.102416000  | 1.970946000  | 3.089461000 |
| 1 | 3.648763000  | 1.897846000  | 4.027569000 |
| 6 | 3.467619000  | 2.917714000  | 2.138410000 |

|    |              |              |              |
|----|--------------|--------------|--------------|
| 1  | 4.300589000  | 3.592648000  | 2.320508000  |
| 6  | 2.766323000  | 2.986799000  | 0.942139000  |
| 1  | 3.076517000  | 3.715214000  | 0.199665000  |
| 6  | 1.693187000  | 2.125093000  | 0.682073000  |
| 23 | -0.190432000 | -0.248774000 | -1.256497000 |
| 6  | -3.340345000 | -1.920028000 | 0.006974000  |
| 1  | -4.359078000 | -1.689659000 | 0.347803000  |
| 6  | 3.528801000  | -1.515122000 | -0.446426000 |
| 1  | 3.935596000  | -2.496211000 | -0.164483000 |
| 6  | -0.198025000 | 3.657154000  | -1.039800000 |
| 1  | -0.142846000 | 3.929282000  | -2.104408000 |
| 6  | 0.323784000  | 4.815217000  | -0.201692000 |
| 1  | -0.303931000 | 5.699288000  | -0.356320000 |
| 1  | 0.290283000  | 4.576181000  | 0.866014000  |
| 1  | 1.348619000  | 5.102169000  | -0.440733000 |
| 6  | -1.653163000 | 3.376804000  | -0.707081000 |
| 1  | -1.780053000 | 3.050743000  | 0.329906000  |
| 1  | -2.261464000 | 4.277542000  | -0.842480000 |
| 1  | -2.062339000 | 2.600493000  | -1.354169000 |
| 6  | -3.427135000 | -2.712845000 | -1.291064000 |
| 1  | -3.959237000 | -2.179619000 | -2.084050000 |
| 1  | -2.427580000 | -2.953312000 | -1.664395000 |
| 1  | -3.948095000 | -3.662803000 | -1.133803000 |
| 6  | -2.639671000 | -2.705644000 | 1.103240000  |
| 1  | -2.627390000 | -2.160974000 | 2.050710000  |
| 1  | -3.151264000 | -3.658559000 | 1.275159000  |
| 1  | -1.599520000 | -2.931844000 | 0.850216000  |
| 6  | 3.964038000  | -1.185005000 | -1.869099000 |
| 1  | 5.055511000  | -1.137954000 | -1.938674000 |
| 1  | 3.624084000  | -1.916394000 | -2.608508000 |
| 1  | 3.579003000  | -0.208665000 | -2.181113000 |
| 6  | 4.057639000  | -0.498095000 | 0.547696000  |
| 1  | 3.736021000  | 0.518744000  | 0.308737000  |
| 1  | 3.738572000  | -0.712518000 | 1.570336000  |
| 1  | 5.152746000  | -0.503112000 | 0.535029000  |
| 5  | 0.060932000  | 0.179043000  | 1.529931000  |
| 7  | -0.946542000 | -1.621445000 | -3.978229000 |
| 7  | -0.515870000 | -0.941178000 | -2.823751000 |
| 1  | -1.341711000 | -0.983870000 | -4.681838000 |
| 15 | 0.836263000  | 2.090797000  | -0.931758000 |
| 15 | -2.535003000 | -0.261820000 | -0.290168000 |
| 15 | 1.677652000  | -1.756823000 | -0.396024000 |
| 6  | 2.192115000  | 2.379760000  | -2.208680000 |
| 1  | 3.051557000  | 1.839923000  | -1.784294000 |
| 6  | 2.616428000  | 3.819192000  | -2.481864000 |
| 1  | 3.402632000  | 3.828059000  | -3.244093000 |

|   |              |              |              |
|---|--------------|--------------|--------------|
| 1 | 1.794587000  | 4.424053000  | -2.876443000 |
| 1 | 3.018876000  | 4.339465000  | -1.612551000 |
| 6 | 1.798237000  | 1.715184000  | -3.524561000 |
| 1 | 1.582196000  | 0.649994000  | -3.407730000 |
| 1 | 0.901062000  | 2.180446000  | -3.952288000 |
| 1 | 2.598081000  | 1.823143000  | -4.264956000 |
| 6 | 1.526960000  | -3.338955000 | -1.421268000 |
| 1 | 1.483041000  | -2.929178000 | -2.441983000 |
| 6 | 0.204212000  | -4.032731000 | -1.139994000 |
| 1 | -0.631488000 | -3.333495000 | -1.188499000 |
| 1 | 0.020858000  | -4.834870000 | -1.863839000 |
| 1 | 0.189045000  | -4.488004000 | -0.144590000 |
| 6 | 2.673357000  | -4.343295000 | -1.376079000 |
| 1 | 2.449282000  | -5.176756000 | -2.050864000 |
| 1 | 3.632342000  | -3.931110000 | -1.694534000 |
| 1 | 2.813331000  | -4.782256000 | -0.385137000 |
| 6 | -3.851993000 | 0.646951000  | -1.305195000 |
| 1 | -3.813474000 | 1.659102000  | -0.884119000 |
| 6 | -5.290874000 | 0.154720000  | -1.167708000 |
| 1 | -5.961942000 | 0.850398000  | -1.682267000 |
| 1 | -5.447008000 | -0.824956000 | -1.626814000 |
| 1 | -5.640011000 | 0.084920000  | -0.136207000 |
| 6 | -3.478714000 | 0.735112000  | -2.781119000 |
| 1 | -2.459934000 | 1.101870000  | -2.940642000 |
| 1 | -3.552893000 | -0.244787000 | -3.267820000 |
| 1 | -4.167048000 | 1.402197000  | -3.310632000 |
| 1 | -1.670897000 | -2.326562000 | -3.779516000 |
| 1 | -0.177020000 | -2.120808000 | -4.441660000 |

$[8c''_{PB}]_{alt}$  (TE = -3507.842418)

|   |              |              |             |
|---|--------------|--------------|-------------|
| 6 | 0.845096000  | -1.283197000 | 1.849064000 |
| 6 | 0.521727000  | -2.100409000 | 2.948655000 |
| 1 | -0.451612000 | -1.975074000 | 3.423406000 |
| 6 | 1.395594000  | -3.055505000 | 3.456134000 |
| 1 | 1.099506000  | -3.669995000 | 4.304836000 |
| 6 | 2.650776000  | -3.214041000 | 2.880795000 |
| 1 | 3.353056000  | -3.947729000 | 3.271285000 |
| 6 | 2.994527000  | -2.435891000 | 1.779941000 |
| 1 | 3.969239000  | -2.585809000 | 1.324571000 |
| 6 | 2.106157000  | -1.498022000 | 1.243900000 |
| 6 | 0.237515000  | 1.354290000  | 1.931650000 |
| 6 | 0.825658000  | 1.520280000  | 3.197660000 |
| 1 | 1.107287000  | 0.632081000  | 3.765394000 |
| 6 | 1.060537000  | 2.774905000  | 3.749635000 |
| 1 | 1.523527000  | 2.859582000  | 4.731588000 |
| 6 | 0.699734000  | 3.922667000  | 3.049575000 |

|    |              |              |              |
|----|--------------|--------------|--------------|
| 1  | 0.875711000  | 4.908460000  | 3.475127000  |
| 6  | 0.119883000  | 3.796323000  | 1.791854000  |
| 1  | -0.152596000 | 4.694657000  | 1.239841000  |
| 6  | -0.096745000 | 2.535439000  | 1.226989000  |
| 6  | -1.714555000 | -0.448818000 | 1.673763000  |
| 6  | -2.312036000 | -0.052731000 | 2.884201000  |
| 1  | -1.712549000 | 0.505875000  | 3.604230000  |
| 6  | -3.639705000 | -0.325725000 | 3.187834000  |
| 1  | -4.063182000 | 0.004976000  | 4.134846000  |
| 6  | -4.429558000 | -1.008509000 | 2.268248000  |
| 1  | -5.476084000 | -1.216117000 | 2.482196000  |
| 6  | -3.871532000 | -1.414371000 | 1.062485000  |
| 1  | -4.505744000 | -1.927641000 | 0.344138000  |
| 6  | -2.530145000 | -1.148344000 | 0.758091000  |
| 23 | 0.128658000  | 0.044895000  | -1.194356000 |
| 6  | 3.964570000  | 0.388303000  | 0.057109000  |
| 1  | 4.718574000  | -0.323740000 | 0.422712000  |
| 6  | -2.458152000 | 2.925360000  | -0.500336000 |
| 1  | -2.375441000 | 4.005298000  | -0.313821000 |
| 6  | -1.418282000 | -3.405422000 | -0.846082000 |
| 1  | -1.886004000 | -3.799041000 | -1.757786000 |
| 6  | -2.006347000 | -4.127377000 | 0.357420000  |
| 1  | -1.794596000 | -5.201384000 | 0.300450000  |
| 1  | -1.568899000 | -3.756721000 | 1.290984000  |
| 1  | -3.089537000 | -4.008668000 | 0.443691000  |
| 6  | 0.077143000  | -3.662016000 | -0.949564000 |
| 1  | 0.607437000  | -3.295488000 | -0.064817000 |
| 1  | 0.279998000  | -4.736474000 | -1.031965000 |
| 1  | 0.515845000  | -3.170650000 | -1.823858000 |
| 6  | 4.519537000  | 1.090866000  | -1.176612000 |
| 1  | 4.649583000  | 0.424517000  | -2.034316000 |
| 1  | 3.869573000  | 1.908233000  | -1.500376000 |
| 1  | 5.498002000  | 1.535129000  | -0.962305000 |
| 6  | 3.666405000  | 1.375328000  | 1.174540000  |
| 1  | 3.363741000  | 0.869704000  | 2.095238000  |
| 1  | 4.552022000  | 1.980089000  | 1.401303000  |
| 1  | 2.857914000  | 2.064890000  | 0.909916000  |
| 6  | -3.058985000 | 2.696633000  | -1.881475000 |
| 1  | -4.039572000 | 3.177432000  | -1.968781000 |
| 1  | -2.433120000 | 3.074827000  | -2.696388000 |
| 1  | -3.204869000 | 1.625421000  | -2.060149000 |
| 6  | -3.339323000 | 2.330022000  | 0.583279000  |
| 1  | -3.508218000 | 1.261128000  | 0.426733000  |
| 1  | -2.911461000 | 2.449783000  | 1.582130000  |
| 1  | -4.320484000 | 2.818511000  | 0.580149000  |
| 5  | -0.167064000 | -0.120093000 | 1.455376000  |



|    |              |              |              |
|----|--------------|--------------|--------------|
| 7  | 1.443051000  | 0.977886000  | -3.774434000 |
| 7  | 0.381983000  | 0.291475000  | -3.094308000 |
| 1  | 1.893264000  | 0.321190000  | -4.419432000 |
| 15 | -1.802965000 | -1.550455000 | -0.878153000 |
| 15 | 2.463164000  | -0.658095000 | -0.359526000 |
| 15 | -0.700018000 | 2.291456000  | -0.477718000 |
| 6  | -3.292382000 | -1.468180000 | -2.036916000 |
| 1  | -3.900634000 | -0.663672000 | -1.596253000 |
| 6  | -4.156240000 | -2.720701000 | -2.160729000 |
| 1  | -5.105267000 | -2.478080000 | -2.651846000 |
| 1  | -3.673410000 | -3.480885000 | -2.782888000 |
| 1  | -4.396878000 | -3.195487000 | -1.207121000 |
| 6  | -2.842398000 | -1.022696000 | -3.423500000 |
| 1  | -2.369540000 | -0.037219000 | -3.401715000 |
| 1  | -2.120210000 | -1.726925000 | -3.855740000 |
| 1  | -3.691329000 | -0.968316000 | -4.114491000 |
| 6  | 0.149779000  | 3.561254000  | -1.581422000 |
| 1  | 0.035178000  | 3.099741000  | -2.573440000 |
| 6  | 1.639053000  | 3.605364000  | -1.277239000 |
| 1  | 2.052098000  | 2.599209000  | -1.178148000 |
| 1  | 2.186585000  | 4.116572000  | -2.076699000 |
| 1  | 1.849458000  | 4.131367000  | -0.339789000 |
| 6  | -0.428524000 | 4.969655000  | -1.641723000 |
| 1  | 0.161689000  | 5.578252000  | -2.336373000 |
| 1  | -1.461285000 | 5.000056000  | -1.996312000 |
| 1  | -0.396565000 | 5.481674000  | -0.674816000 |
| 6  | 3.246580000  | -2.061110000 | -1.378688000 |
| 1  | 2.711821000  | -2.942340000 | -1.000280000 |
| 6  | 4.743070000  | -2.318417000 | -1.216846000 |
| 1  | 5.017090000  | -3.223934000 | -1.770264000 |
| 1  | 5.349805000  | -1.507810000 | -1.630132000 |
| 1  | 5.068960000  | -2.469981000 | -0.186928000 |
| 6  | 2.927706000  | -1.922187000 | -2.863099000 |
| 1  | 1.870035000  | -1.710544000 | -3.044689000 |
| 1  | 3.507668000  | -1.111239000 | -3.319302000 |
| 1  | 3.194261000  | -2.839756000 | -3.400295000 |
| 1  | -0.360438000 | 0.200453000  | -3.786139000 |
| 1  | 2.152013000  | 1.162255000  | -3.063201000 |

$[8c''_{PB}]_{dis}$  (TE = -3451.334767)

|   |             |             |             |
|---|-------------|-------------|-------------|
| 6 | 1.556328000 | 0.492088000 | 1.877752000 |
| 6 | 1.760872000 | 0.292245000 | 3.254854000 |
| 1 | 0.895092000 | 0.137852000 | 3.899837000 |
| 6 | 3.029890000 | 0.269127000 | 3.822590000 |
| 1 | 3.143717000 | 0.108597000 | 4.893260000 |
| 6 | 4.153369000 | 0.439204000 | 3.018995000 |

|    |              |              |              |
|----|--------------|--------------|--------------|
| 1  | 5.151293000  | 0.413160000  | 3.451702000  |
| 6  | 3.988188000  | 0.633874000  | 1.653405000  |
| 1  | 4.869288000  | 0.752228000  | 1.025042000  |
| 6  | 2.710817000  | 0.659987000  | 1.083559000  |
| 6  | -0.858485000 | 1.781998000  | 1.480472000  |
| 6  | -0.605868000 | 2.739482000  | 2.478049000  |
| 1  | 0.335624000  | 2.691660000  | 3.026301000  |
| 6  | -1.536748000 | 3.716415000  | 2.815419000  |
| 1  | -1.308304000 | 4.437261000  | 3.598820000  |
| 6  | -2.773428000 | 3.753293000  | 2.176884000  |
| 1  | -3.518666000 | 4.494459000  | 2.457496000  |
| 6  | -3.036700000 | 2.848272000  | 1.151426000  |
| 1  | -3.993099000 | 2.896909000  | 0.633464000  |
| 6  | -2.084318000 | 1.900663000  | 0.773035000  |
| 6  | -0.778120000 | -0.850651000 | 1.703677000  |
| 6  | -1.534223000 | -0.717874000 | 2.889422000  |
| 1  | -1.574387000 | 0.257169000  | 3.374624000  |
| 6  | -2.238479000 | -1.764648000 | 3.468365000  |
| 1  | -2.794312000 | -1.599901000 | 4.389792000  |
| 6  | -2.247076000 | -3.011704000 | 2.854786000  |
| 1  | -2.806064000 | -3.841420000 | 3.282162000  |
| 6  | -1.537762000 | -3.180279000 | 1.675311000  |
| 1  | -1.564851000 | -4.149617000 | 1.185089000  |
| 6  | -0.798637000 | -2.135495000 | 1.099316000  |
| 23 | 0.127858000  | 0.004502000  | -1.261265000 |
| 6  | 2.659919000  | 2.660888000  | -1.027954000 |
| 1  | 3.712935000  | 2.867601000  | -0.789445000 |
| 6  | -3.893111000 | 0.095050000  | -0.732339000 |
| 1  | -4.624122000 | 0.911169000  | -0.640643000 |
| 6  | 1.440047000  | -3.573465000 | -0.155461000 |
| 1  | 1.694421000  | -4.000193000 | -1.138687000 |
| 6  | 1.166428000  | -4.701662000 | 0.831871000  |
| 1  | 2.059127000  | -5.330724000 | 0.923613000  |
| 1  | 0.952938000  | -4.304005000 | 1.828526000  |
| 1  | 0.341137000  | -5.355645000 | 0.552726000  |
| 6  | 2.621221000  | -2.757818000 | 0.346280000  |
| 1  | 2.387336000  | -2.255914000 | 1.292261000  |
| 1  | 3.491986000  | -3.398269000 | 0.524420000  |
| 1  | 2.909918000  | -1.988877000 | -0.366988000 |
| 6  | 2.408305000  | 2.988343000  | -2.494944000 |
| 1  | 3.123452000  | 2.500465000  | -3.162929000 |
| 1  | 1.417054000  | 2.660675000  | -2.818428000 |
| 1  | 2.485436000  | 4.067732000  | -2.667154000 |
| 6  | 1.800322000  | 3.498424000  | -0.092465000 |
| 1  | 2.037785000  | 3.313894000  | 0.959189000  |
| 1  | 1.958725000  | 4.565106000  | -0.286776000 |

|    |              |              |              |
|----|--------------|--------------|--------------|
| 1  | 0.733398000  | 3.300365000  | -0.215887000 |
| 6  | -4.127091000 | -0.636813000 | -2.048484000 |
| 1  | -5.125557000 | -1.086707000 | -2.071126000 |
| 1  | -4.040482000 | 0.013218000  | -2.923741000 |
| 1  | -3.401293000 | -1.446171000 | -2.182605000 |
| 6  | -4.065302000 | -0.829788000 | 0.459179000  |
| 1  | -3.362086000 | -1.666990000 | 0.426969000  |
| 1  | -3.910073000 | -0.313414000 | 1.409987000  |
| 1  | -5.076033000 | -1.253088000 | 0.469784000  |
| 5  | 0.050984000  | 0.492554000  | 1.336469000  |
| 15 | 2.434178000  | 0.829554000  | -0.710766000 |
| 15 | -2.222213000 | 0.919001000  | -0.768306000 |
| 15 | 0.008856000  | -2.413899000 | -0.520761000 |
| 6  | -2.473579000 | 2.209627000  | -2.118985000 |
| 1  | -2.244334000 | 1.629047000  | -3.023478000 |
| 6  | -1.421643000 | 3.301399000  | -2.000000000 |
| 1  | -1.474220000 | 3.980997000  | -2.857661000 |
| 1  | -1.558519000 | 3.902198000  | -1.093590000 |
| 1  | -0.415769000 | 2.880052000  | -1.983013000 |
| 6  | -3.859409000 | 2.825056000  | -2.256459000 |
| 1  | -3.871981000 | 3.497475000  | -3.121806000 |
| 1  | -4.655333000 | 2.093943000  | -2.415730000 |
| 1  | -4.131267000 | 3.434523000  | -1.389611000 |
| 6  | 3.954991000  | 0.070312000  | -1.529766000 |
| 1  | 4.274288000  | -0.694299000 | -0.809905000 |
| 6  | 5.148856000  | 0.991520000  | -1.755461000 |
| 1  | 5.996672000  | 0.408702000  | -2.132505000 |
| 1  | 4.946105000  | 1.765995000  | -2.499839000 |
| 1  | 5.487019000  | 1.495416000  | -0.846179000 |
| 6  | 3.549232000  | -0.627990000 | -2.823592000 |
| 1  | 4.404941000  | -1.147615000 | -3.269305000 |
| 1  | 2.749150000  | -1.358577000 | -2.664114000 |
| 1  | 3.167318000  | 0.081414000  | -3.564487000 |
| 6  | -1.205195000 | -3.399314000 | -1.565897000 |
| 1  | -2.179652000 | -3.009702000 | -1.233955000 |
| 6  | -0.999946000 | -3.011330000 | -3.029198000 |
| 1  | -0.020257000 | -3.343147000 | -3.394610000 |
| 1  | -1.756223000 | -3.489345000 | -3.661780000 |
| 1  | -1.046456000 | -1.930773000 | -3.186763000 |
| 6  | -1.220990000 | -4.917763000 | -1.442251000 |
| 1  | -0.248591000 | -5.357714000 | -1.686409000 |
| 1  | -1.513336000 | -5.280328000 | -0.455124000 |
| 1  | -1.940322000 | -5.333962000 | -2.156208000 |
| 7  | 0.143634000  | 0.355275000  | -2.802669000 |

$[9c''_{PB}]_{alt}$  (TE = -3508.283230)

|    |              |              |              |
|----|--------------|--------------|--------------|
| 6  | 1.068067000  | -1.521385000 | 1.589754000  |
| 6  | 0.857233000  | -2.520683000 | 2.558094000  |
| 1  | -0.115646000 | -2.582343000 | 3.043955000  |
| 6  | 1.850950000  | -3.415129000 | 2.937241000  |
| 1  | 1.644964000  | -4.167927000 | 3.695382000  |
| 6  | 3.110956000  | -3.335807000 | 2.355144000  |
| 1  | 3.904545000  | -4.016571000 | 2.653691000  |
| 6  | 3.341472000  | -2.388374000 | 1.364932000  |
| 1  | 4.321201000  | -2.354368000 | 0.896591000  |
| 6  | 2.337248000  | -1.502484000 | 0.960408000  |
| 6  | 0.314245000  | 1.030550000  | 2.009308000  |
| 6  | 0.998849000  | 1.069116000  | 3.237671000  |
| 1  | 1.387686000  | 0.138359000  | 3.651950000  |
| 6  | 1.186411000  | 2.249367000  | 3.946419000  |
| 1  | 1.718953000  | 2.234566000  | 4.895259000  |
| 6  | 0.687729000  | 3.449096000  | 3.446974000  |
| 1  | 0.821362000  | 4.376265000  | 3.999078000  |
| 6  | 0.023044000  | 3.452316000  | 2.227337000  |
| 1  | -0.356526000 | 4.393211000  | 1.833546000  |
| 6  | -0.153214000 | 2.266386000  | 1.505602000  |
| 6  | -1.561889000 | -0.847000000 | 1.709069000  |
| 6  | -2.018939000 | -0.712605000 | 3.032341000  |
| 1  | -1.353767000 | -0.271182000 | 3.774987000  |
| 6  | -3.291152000 | -1.106890000 | 3.426048000  |
| 1  | -3.604314000 | -0.980689000 | 4.460403000  |
| 6  | -4.167965000 | -1.649181000 | 2.491727000  |
| 1  | -5.171215000 | -1.950678000 | 2.783147000  |
| 6  | -3.754115000 | -1.789938000 | 1.174450000  |
| 1  | -4.454978000 | -2.189483000 | 0.446934000  |
| 6  | -2.467970000 | -1.399774000 | 0.779579000  |
| 23 | 0.048748000  | 0.100810000  | -1.108664000 |
| 6  | 4.002265000  | 0.679211000  | -0.095164000 |
| 1  | 4.832851000  | -0.008237000 | 0.118601000  |
| 6  | -2.674165000 | 2.764883000  | 0.048580000  |
| 1  | -2.608532000 | 3.807456000  | 0.389566000  |
| 6  | -1.374208000 | -3.189099000 | -1.355811000 |
| 1  | -1.750701000 | -3.368623000 | -2.372937000 |
| 6  | -1.943607000 | -4.240970000 | -0.417103000 |
| 1  | -1.629565000 | -5.242470000 | -0.729794000 |
| 1  | -1.585001000 | -4.089277000 | 0.606203000  |
| 1  | -3.035432000 | -4.236437000 | -0.381677000 |
| 6  | 0.145659000  | -3.261849000 | -1.402934000 |
| 1  | 0.592550000  | -3.118834000 | -0.414813000 |
| 1  | 0.484587000  | -4.235645000 | -1.772720000 |
| 1  | 0.570806000  | -2.509962000 | -2.081298000 |
| 6  | 4.397693000  | 1.563710000  | -1.271996000 |

|    |              |              |              |
|----|--------------|--------------|--------------|
| 1  | 4.508401000  | 1.016632000  | -2.211556000 |
| 1  | 3.665321000  | 2.355968000  | -1.445932000 |
| 1  | 5.353031000  | 2.058626000  | -1.070225000 |
| 6  | 3.726625000  | 1.488981000  | 1.161875000  |
| 1  | 3.536091000  | 0.848956000  | 2.026821000  |
| 1  | 4.587822000  | 2.122145000  | 1.399686000  |
| 1  | 2.857894000  | 2.145908000  | 1.051591000  |
| 6  | -3.386950000 | 2.723985000  | -1.296905000 |
| 1  | -4.387271000 | 3.161904000  | -1.222424000 |
| 1  | -2.856992000 | 3.267084000  | -2.087184000 |
| 1  | -3.513997000 | 1.691232000  | -1.637897000 |
| 6  | -3.428977000 | 1.977875000  | 1.105774000  |
| 1  | -3.595182000 | 0.940709000  | 0.804996000  |
| 1  | -2.905819000 | 1.961202000  | 2.065454000  |
| 1  | -4.412582000 | 2.429085000  | 1.272409000  |
| 5  | -0.052798000 | -0.406830000 | 1.408959000  |
| 15 | 2.575823000  | -0.444863000 | -0.522930000 |
| 15 | -0.897172000 | 2.240894000  | -0.156260000 |
| 15 | -1.939573000 | -1.440302000 | -0.963434000 |
| 6  | -0.174978000 | 3.706303000  | -1.099629000 |
| 1  | -0.325965000 | 3.412904000  | -2.151456000 |
| 6  | 1.325414000  | 3.789550000  | -0.848311000 |
| 1  | 1.824680000  | 4.397094000  | -1.611240000 |
| 1  | 1.543499000  | 4.243988000  | 0.122415000  |
| 1  | 1.798797000  | 2.803016000  | -0.831713000 |
| 6  | -0.827686000 | 5.072026000  | -0.922168000 |
| 1  | -0.306236000 | 5.809694000  | -1.541525000 |
| 1  | -1.877520000 | 5.092989000  | -1.221092000 |
| 1  | -0.769558000 | 5.434155000  | 0.107661000  |
| 6  | 3.342331000  | -1.653950000 | -1.770659000 |
| 1  | 2.892041000  | -2.612886000 | -1.478816000 |
| 6  | 4.859727000  | -1.815649000 | -1.721108000 |
| 1  | 5.156586000  | -2.627646000 | -2.392801000 |
| 1  | 5.383329000  | -0.919888000 | -2.065308000 |
| 1  | 5.254205000  | -2.065573000 | -0.735855000 |
| 6  | 2.925603000  | -1.340353000 | -3.203795000 |
| 1  | 3.353346000  | -2.078178000 | -3.890837000 |
| 1  | 1.841609000  | -1.362802000 | -3.350591000 |
| 1  | 3.261935000  | -0.353119000 | -3.528991000 |
| 6  | -3.488682000 | -1.237461000 | -2.000471000 |
| 1  | -4.088519000 | -0.507419000 | -1.436639000 |
| 6  | -3.103992000 | -0.621646000 | -3.342631000 |
| 1  | -2.429466000 | -1.278277000 | -3.906861000 |
| 1  | -3.986749000 | -0.462442000 | -3.969727000 |
| 1  | -2.607210000 | 0.345482000  | -3.223177000 |
| 6  | -4.334680000 | -2.485211000 | -2.235934000 |

|   |              |              |              |
|---|--------------|--------------|--------------|
| 1 | -3.802578000 | -3.235110000 | -2.828769000 |
| 1 | -4.670040000 | -2.974217000 | -1.320786000 |
| 1 | -5.232805000 | -2.220573000 | -2.803321000 |
| 7 | 0.137838000  | 0.847769000  | -3.253797000 |
| 1 | -0.699385000 | 1.415887000  | -3.403073000 |
| 1 | 0.053630000  | 0.077258000  | -3.915061000 |
| 7 | 1.327033000  | 1.569629000  | -3.640586000 |
| 1 | 1.103033000  | 2.207069000  | -4.403471000 |
| 1 | 1.586812000  | 2.149412000  | -2.847467000 |

[9c''<sub>pg</sub>]<sub>dis</sub> (TE = -3451.783734)

|    |              |              |              |
|----|--------------|--------------|--------------|
| 6  | -0.812057000 | -1.225549000 | 1.885145000  |
| 6  | -1.240039000 | -1.236099000 | 3.223004000  |
| 1  | -0.869422000 | -0.473750000 | 3.909369000  |
| 6  | -2.133759000 | -2.192802000 | 3.692467000  |
| 1  | -2.452635000 | -2.174284000 | 4.732266000  |
| 6  | -2.626262000 | -3.169157000 | 2.830422000  |
| 1  | -3.326072000 | -3.918301000 | 3.192507000  |
| 6  | -2.231515000 | -3.172423000 | 1.498430000  |
| 1  | -2.640294000 | -3.923367000 | 0.826462000  |
| 6  | -1.338047000 | -2.207099000 | 1.025882000  |
| 6  | 1.816110000  | -0.474107000 | 1.709780000  |
| 6  | 2.182880000  | -1.144891000 | 2.887277000  |
| 1  | 1.407216000  | -1.609032000 | 3.495464000  |
| 6  | 3.504321000  | -1.209227000 | 3.317164000  |
| 1  | 3.748388000  | -1.727804000 | 4.241696000  |
| 6  | 4.512257000  | -0.602356000 | 2.574058000  |
| 1  | 5.544619000  | -0.637391000 | 2.913107000  |
| 6  | 4.191416000  | 0.023583000  | 1.374483000  |
| 1  | 4.986619000  | 0.457674000  | 0.768321000  |
| 6  | 2.867783000  | 0.075603000  | 0.931560000  |
| 6  | -0.047477000 | 1.390569000  | 1.433360000  |
| 6  | 0.704690000  | 2.109879000  | 2.399455000  |
| 1  | 1.458800000  | 1.577650000  | 2.974307000  |
| 6  | 0.486457000  | 3.444362000  | 2.686413000  |
| 1  | 1.040971000  | 3.923451000  | 3.489862000  |
| 6  | -0.403995000 | 4.179526000  | 1.906491000  |
| 1  | -0.542904000 | 5.244441000  | 2.076076000  |
| 6  | -1.120971000 | 3.537931000  | 0.914137000  |
| 1  | -1.808071000 | 4.121266000  | 0.310762000  |
| 6  | -1.024672000 | 2.146802000  | 0.713327000  |
| 23 | -0.021004000 | 0.292499000  | -1.099835000 |
| 6  | 0.361226000  | -3.507811000 | -0.958865000 |
| 1  | -0.279971000 | -4.398122000 | -0.959748000 |
| 6  | 3.014386000  | 2.385942000  | -1.012376000 |
| 1  | 4.109876000  | 2.332828000  | -1.038563000 |

|    |              |              |              |
|----|--------------|--------------|--------------|
| 6  | -3.816676000 | 1.067777000  | 0.503740000  |
| 1  | -4.555071000 | 1.327637000  | -0.267273000 |
| 6  | -3.956607000 | 2.032608000  | 1.673931000  |
| 1  | -4.955360000 | 1.936804000  | 2.111876000  |
| 1  | -3.231425000 | 1.802868000  | 2.461835000  |
| 1  | -3.819310000 | 3.079793000  | 1.399660000  |
| 6  | -4.099182000 | -0.352210000 | 0.958037000  |
| 1  | -3.445813000 | -0.657093000 | 1.776790000  |
| 1  | -5.128314000 | -0.414121000 | 1.326698000  |
| 1  | -3.999548000 | -1.085522000 | 0.156266000  |
| 6  | 1.021368000  | -3.397193000 | -2.329563000 |
| 1  | 0.296149000  | -3.526419000 | -3.138969000 |
| 1  | 1.496307000  | -2.423604000 | -2.484484000 |
| 1  | 1.790398000  | -4.165573000 | -2.457922000 |
| 6  | 1.327271000  | -3.656751000 | 0.208940000  |
| 1  | 0.804872000  | -3.958245000 | 1.120847000  |
| 1  | 2.076922000  | -4.423403000 | -0.012158000 |
| 1  | 1.860105000  | -2.735276000 | 0.448748000  |
| 6  | 2.496967000  | 2.882776000  | -2.359916000 |
| 1  | 2.967897000  | 3.835603000  | -2.621398000 |
| 1  | 2.678612000  | 2.187819000  | -3.184670000 |
| 1  | 1.414528000  | 3.049217000  | -2.321417000 |
| 6  | 2.611015000  | 3.334783000  | 0.097521000  |
| 1  | 1.525241000  | 3.452458000  | 0.146317000  |
| 1  | 2.960042000  | 3.007078000  | 1.079701000  |
| 1  | 3.032999000  | 4.327724000  | -0.090128000 |
| 5  | 0.279429000  | -0.173565000 | 1.432825000  |
| 15 | -0.800925000 | -2.075188000 | -0.709881000 |
| 15 | 2.440105000  | 0.633068000  | -0.747287000 |
| 15 | -2.197606000 | 1.326830000  | -0.428878000 |
| 6  | 3.551267000  | -0.334278000 | -1.936237000 |
| 1  | 2.898990000  | -0.466248000 | -2.811223000 |
| 6  | 3.924979000  | -1.709141000 | -1.397278000 |
| 1  | 4.325345000  | -2.328677000 | -2.206088000 |
| 1  | 4.699030000  | -1.639003000 | -0.628363000 |
| 1  | 3.087610000  | -2.246151000 | -0.959787000 |
| 6  | 4.821432000  | 0.379509000  | -2.387634000 |
| 1  | 5.370022000  | -0.273945000 | -3.073617000 |
| 1  | 4.645114000  | 1.317370000  | -2.916228000 |
| 1  | 5.496797000  | 0.587079000  | -1.551124000 |
| 6  | -2.299735000 | -2.532378000 | -1.753815000 |
| 1  | -3.135584000 | -2.154160000 | -1.150817000 |
| 6  | -2.510809000 | -4.027137000 | -1.972957000 |
| 1  | -3.481561000 | -4.188167000 | -2.452262000 |
| 1  | -1.757583000 | -4.449979000 | -2.644723000 |
| 1  | -2.504464000 | -4.621118000 | -1.056957000 |

|   |              |              |              |
|---|--------------|--------------|--------------|
| 6 | -2.318003000 | -1.806404000 | -3.091927000 |
| 1 | -3.230175000 | -2.058083000 | -3.642863000 |
| 1 | -2.279762000 | -0.724463000 | -2.974112000 |
| 1 | -1.470294000 | -2.092414000 | -3.723380000 |
| 6 | -2.636859000 | 2.622591000  | -1.716424000 |
| 1 | -1.692236000 | 3.170636000  | -1.851132000 |
| 6 | -2.976362000 | 1.929121000  | -3.032375000 |
| 1 | -3.842914000 | 1.264523000  | -2.929894000 |
| 1 | -3.236252000 | 2.670792000  | -3.793853000 |
| 1 | -2.137998000 | 1.340347000  | -3.407606000 |
| 6 | -3.746128000 | 3.612369000  | -1.367969000 |
| 1 | -4.722963000 | 3.125209000  | -1.298708000 |
| 1 | -3.593642000 | 4.165255000  | -0.440663000 |
| 1 | -3.828729000 | 4.352333000  | -2.170077000 |
| 7 | 0.140622000  | 0.338240000  | -2.758320000 |
| 1 | 0.382863000  | 0.145560000  | -3.733861000 |

**[10c''<sub>PB</sub>]<sub>alt</sub> (TE = -3508.414634)**

|   |              |              |             |
|---|--------------|--------------|-------------|
| 6 | 0.886801000  | -1.237011000 | 1.894568000 |
| 6 | 0.612429000  | -2.031848000 | 3.023045000 |
| 1 | -0.348476000 | -1.911338000 | 3.525004000 |
| 6 | 1.513967000  | -2.967673000 | 3.520046000 |
| 1 | 1.254643000  | -3.564979000 | 4.392838000 |
| 6 | 2.746367000  | -3.135634000 | 2.898370000 |
| 1 | 3.464384000  | -3.861112000 | 3.275991000 |
| 6 | 3.044687000  | -2.377063000 | 1.771326000 |
| 1 | 4.000173000  | -2.531588000 | 1.273804000 |
| 6 | 2.131304000  | -1.451157000 | 1.255759000 |
| 6 | 0.072043000  | 1.365530000  | 1.971772000 |
| 6 | 0.579210000  | 1.551066000  | 3.269783000 |
| 1 | 0.902120000  | 0.674232000  | 3.833083000 |
| 6 | 0.681400000  | 2.805031000  | 3.863220000 |
| 1 | 1.087346000  | 2.900817000  | 4.869186000 |
| 6 | 0.252222000  | 3.933960000  | 3.173491000 |
| 1 | 0.312305000  | 4.919821000  | 3.630335000 |
| 6 | -0.245275000 | 3.789488000  | 1.882460000 |
| 1 | -0.568075000 | 4.676406000  | 1.340046000 |
| 6 | -0.314575000 | 2.534256000  | 1.268024000 |
| 6 | -1.717781000 | -0.579167000 | 1.619023000 |
| 6 | -2.411444000 | -0.208426000 | 2.785050000 |
| 1 | -1.891415000 | 0.391116000  | 3.533383000 |
| 6 | -3.740516000 | -0.549039000 | 3.008087000 |
| 1 | -4.240411000 | -0.231744000 | 3.922036000 |
| 6 | -4.433175000 | -1.278176000 | 2.047790000 |
| 1 | -5.480387000 | -1.535781000 | 2.194614000 |
| 6 | -3.774584000 | -1.671206000 | 0.888447000 |



|    |              |              |              |
|----|--------------|--------------|--------------|
| 1  | -4.332513000 | -2.228081000 | 0.139546000  |
| 6  | -2.431452000 | -1.341578000 | 0.667034000  |
| 23 | 0.142157000  | 0.085493000  | -1.060295000 |
| 6  | 3.886516000  | 0.514974000  | 0.090955000  |
| 1  | 4.694300000  | -0.153735000 | 0.420821000  |
| 6  | -2.568095000 | 2.840825000  | -0.619533000 |
| 1  | -2.620293000 | 3.904276000  | -0.348521000 |
| 6  | -1.169900000 | -3.602367000 | -0.781874000 |
| 1  | -1.551907000 | -4.027088000 | -1.719602000 |
| 6  | -1.853026000 | -4.304527000 | 0.382917000  |
| 1  | -1.619615000 | -5.375784000 | 0.372005000  |
| 1  | -1.507329000 | -3.904686000 | 1.342499000  |
| 1  | -2.941077000 | -4.204732000 | 0.371268000  |
| 6  | 0.328738000  | -3.853048000 | -0.746382000 |
| 1  | 0.789658000  | -3.437800000 | 0.155199000  |
| 1  | 0.538659000  | -4.929367000 | -0.755256000 |
| 1  | 0.833741000  | -3.408728000 | -1.607735000 |
| 6  | 4.368797000  | 1.306099000  | -1.118580000 |
| 1  | 4.490284000  | 0.698838000  | -2.020070000 |
| 1  | 3.665912000  | 2.105788000  | -1.369886000 |
| 1  | 5.331230000  | 1.788406000  | -0.912904000 |
| 6  | 3.535064000  | 1.437774000  | 1.248250000  |
| 1  | 3.277911000  | 0.881445000  | 2.153815000  |
| 1  | 4.378527000  | 2.095689000  | 1.488335000  |
| 1  | 2.676387000  | 2.077198000  | 1.016084000  |
| 6  | -3.033060000 | 2.659155000  | -2.059178000 |
| 1  | -4.061801000 | 3.011476000  | -2.194600000 |
| 1  | -2.410009000 | 3.191787000  | -2.787027000 |
| 1  | -3.015698000 | 1.595152000  | -2.329766000 |
| 6  | -3.458708000 | 2.064324000  | 0.332547000  |
| 1  | -3.468648000 | 0.996931000  | 0.092932000  |
| 1  | -3.137045000 | 2.158814000  | 1.372868000  |
| 1  | -4.492307000 | 2.423837000  | 0.268055000  |
| 5  | -0.187590000 | -0.133310000 | 1.471990000  |
| 15 | 2.446124000  | -0.608907000 | -0.349936000 |
| 15 | -0.762719000 | 2.342902000  | -0.500609000 |
| 15 | -1.571989000 | -1.746599000 | -0.908850000 |
| 6  | 0.030366000  | 3.810840000  | -1.414591000 |
| 1  | 0.051866000  | 3.437836000  | -2.452385000 |
| 6  | 1.473751000  | 4.002969000  | -0.970949000 |
| 1  | 2.034611000  | 4.609231000  | -1.691730000 |
| 1  | 1.531849000  | 4.509370000  | -0.002667000 |
| 1  | 1.992739000  | 3.048541000  | -0.852648000 |
| 6  | -0.696156000 | 5.151423000  | -1.443606000 |
| 1  | -0.119733000 | 5.872394000  | -2.035617000 |
| 1  | -1.690553000 | 5.097419000  | -1.892003000 |

|   |              |              |              |
|---|--------------|--------------|--------------|
| 1 | -0.809906000 | 5.589364000  | -0.447901000 |
| 6 | 3.304708000  | -1.962028000 | -1.373075000 |
| 1 | 2.883521000  | -2.881713000 | -0.945902000 |
| 6 | 4.823809000  | -2.074520000 | -1.296026000 |
| 1 | 5.158715000  | -2.956555000 | -1.854454000 |
| 1 | 5.331503000  | -1.213671000 | -1.740275000 |
| 1 | 5.205669000  | -2.183101000 | -0.278242000 |
| 6 | 2.860487000  | -1.874543000 | -2.829303000 |
| 1 | 3.263309000  | -2.710341000 | -3.413671000 |
| 1 | 1.768048000  | -1.903893000 | -2.913957000 |
| 1 | 3.189023000  | -0.944508000 | -3.304461000 |
| 6 | -2.984224000 | -1.744818000 | -2.169201000 |
| 1 | -3.648613000 | -0.954166000 | -1.788873000 |
| 6 | -2.453139000 | -1.303408000 | -3.528134000 |
| 1 | -1.674240000 | -1.985217000 | -3.895568000 |
| 1 | -3.248532000 | -1.288741000 | -4.282313000 |
| 1 | -2.020743000 | -0.299923000 | -3.481754000 |
| 6 | -3.794481000 | -3.027156000 | -2.338240000 |
| 1 | -3.241849000 | -3.779765000 | -2.909829000 |
| 1 | -4.088572000 | -3.496370000 | -1.397210000 |
| 1 | -4.712658000 | -2.824956000 | -2.901488000 |
| 7 | 0.454181000  | 0.588687000  | -3.260046000 |
| 1 | -0.353584000 | 1.150283000  | -3.532751000 |
| 1 | 0.438398000  | -0.230045000 | -3.863705000 |
| 7 | 1.686569000  | 1.283844000  | -3.553724000 |
| 1 | 1.522745000  | 1.979935000  | -4.280603000 |
| 1 | 1.919800000  | 1.794723000  | -2.703985000 |

[10c''<sub>PB</sub>]<sub>dis</sub> (TE = -3451.944309)

|   |              |              |             |
|---|--------------|--------------|-------------|
| 6 | -1.438834000 | 0.472202000  | 1.850028000 |
| 6 | -1.566249000 | 1.175739000  | 3.062044000 |
| 1 | -0.662042000 | 1.445837000  | 3.608135000 |
| 6 | -2.799584000 | 1.544173000  | 3.587441000 |
| 1 | -2.849920000 | 2.092975000  | 4.526411000 |
| 6 | -3.966494000 | 1.211722000  | 2.908188000 |
| 1 | -4.939326000 | 1.493557000  | 3.305682000 |
| 6 | -3.877097000 | 0.532402000  | 1.698663000 |
| 1 | -4.793207000 | 0.305132000  | 1.160235000 |
| 6 | -2.636597000 | 0.172735000  | 1.160479000 |
| 6 | 0.470323000  | -1.471939000 | 1.783870000 |
| 6 | 0.054152000  | -2.010143000 | 3.013549000 |
| 1 | -0.671099000 | -1.455231000 | 3.610315000 |
| 6 | 0.534500000  | -3.222987000 | 3.495397000 |
| 1 | 0.180061000  | -3.608451000 | 4.450096000 |
| 6 | 1.473956000  | -3.939870000 | 2.760723000 |
| 1 | 1.862310000  | -4.886077000 | 3.131665000 |

|    |              |              |              |
|----|--------------|--------------|--------------|
| 6  | 1.902193000  | -3.440164000 | 1.535419000  |
| 1  | 2.624830000  | -4.010671000 | 0.955008000  |
| 6  | 1.398821000  | -2.235148000 | 1.035218000  |
| 6  | 1.174214000  | 1.089684000  | 1.670759000  |
| 6  | 1.911396000  | 0.986219000  | 2.864901000  |
| 1  | 1.706333000  | 0.151260000  | 3.536039000  |
| 6  | 2.908285000  | 1.890425000  | 3.207646000  |
| 1  | 3.460401000  | 1.768058000  | 4.138075000  |
| 6  | 3.212852000  | 2.939424000  | 2.345947000  |
| 1  | 4.006044000  | 3.643762000  | 2.588216000  |
| 6  | 2.501084000  | 3.073224000  | 1.160706000  |
| 1  | 2.766105000  | 3.882097000  | 0.485314000  |
| 6  | 1.485292000  | 2.170991000  | 0.820110000  |
| 23 | -0.120875000 | -0.144881000 | -1.349415000 |
| 6  | -3.103233000 | -2.281312000 | -0.393010000 |
| 1  | -4.147443000 | -2.204281000 | -0.057553000 |
| 6  | 3.592334000  | -1.212154000 | -0.667373000 |
| 1  | 4.106981000  | -2.168865000 | -0.503127000 |
| 6  | -0.603874000 | 3.678006000  | -0.670876000 |
| 1  | -0.413646000 | 4.264609000  | -1.578900000 |
| 6  | -0.380292000 | 4.569630000  | 0.541650000  |
| 1  | -1.086417000 | 5.407807000  | 0.530176000  |
| 1  | -0.541624000 | 4.018619000  | 1.474470000  |
| 1  | 0.626980000  | 4.990107000  | 0.589090000  |
| 6  | -2.044378000 | 3.200429000  | -0.729086000 |
| 1  | -2.303882000 | 2.591461000  | 0.142768000  |
| 1  | -2.733482000 | 4.052861000  | -0.748558000 |
| 1  | -2.232066000 | 2.601379000  | -1.623457000 |
| 6  | -3.070262000 | -2.951317000 | -1.763966000 |
| 1  | -3.844562000 | -2.571669000 | -2.435023000 |
| 1  | -2.114266000 | -2.789435000 | -2.271185000 |
| 1  | -3.220640000 | -4.032878000 | -1.674468000 |
| 6  | -2.332336000 | -3.066277000 | 0.656778000  |
| 1  | -2.408389000 | -2.606793000 | 1.646314000  |
| 1  | -2.722824000 | -4.087495000 | 0.732018000  |
| 1  | -1.267145000 | -3.138368000 | 0.422589000  |
| 6  | 3.969366000  | -0.666982000 | -2.039404000 |
| 1  | 5.051318000  | -0.512035000 | -2.115405000 |
| 1  | 3.672724000  | -1.322728000 | -2.863929000 |
| 1  | 3.487594000  | 0.301255000  | -2.215387000 |
| 6  | 4.019821000  | -0.262936000 | 0.436424000  |
| 1  | 3.583904000  | 0.731494000  | 0.311175000  |
| 1  | 3.734119000  | -0.622376000 | 1.428259000  |
| 1  | 5.109316000  | -0.143491000 | 0.426682000  |
| 5  | 0.023490000  | 0.013596000  | 1.402739000  |
| 15 | -2.473638000 | -0.525291000 | -0.526186000 |

|    |              |              |              |
|----|--------------|--------------|--------------|
| 15 | 1.769894000  | -1.634636000 | -0.651413000 |
| 15 | 0.613132000  | 2.233359000  | -0.790770000 |
| 6  | 1.770585000  | -3.133140000 | -1.801945000 |
| 1  | 1.643842000  | -2.644295000 | -2.778201000 |
| 6  | 0.541162000  | -3.995872000 | -1.567678000 |
| 1  | 0.449326000  | -4.756270000 | -2.351074000 |
| 1  | 0.585047000  | -4.519513000 | -0.606624000 |
| 1  | -0.370935000 | -3.399644000 | -1.578948000 |
| 6  | 3.025290000  | -3.997190000 | -1.863461000 |
| 1  | 2.875036000  | -4.801233000 | -2.592981000 |
| 1  | 3.917337000  | -3.451349000 | -2.178135000 |
| 1  | 3.255225000  | -4.484437000 | -0.911202000 |
| 6  | -3.857169000 | 0.314645000  | -1.506588000 |
| 1  | -3.907668000 | 1.309430000  | -1.045419000 |
| 6  | -5.250410000 | -0.304095000 | -1.417225000 |
| 1  | -5.976261000 | 0.360698000  | -1.898846000 |
| 1  | -5.312771000 | -1.261661000 | -1.940893000 |
| 1  | -5.603099000 | -0.472325000 | -0.397973000 |
| 6  | -3.466641000 | 0.484246000  | -2.970871000 |
| 1  | -4.222415000 | 1.073728000  | -3.502723000 |
| 1  | -2.496635000 | 0.972044000  | -3.092879000 |
| 1  | -3.389047000 | -0.482473000 | -3.480308000 |
| 6  | 1.918656000  | 2.898983000  | -1.977850000 |
| 1  | 2.846310000  | 2.450553000  | -1.590216000 |
| 6  | 1.671030000  | 2.368577000  | -3.385492000 |
| 1  | 0.724097000  | 2.749250000  | -3.788748000 |
| 1  | 2.465195000  | 2.695489000  | -4.066738000 |
| 1  | 1.607296000  | 1.278588000  | -3.417128000 |
| 6  | 2.099054000  | 4.414308000  | -2.036903000 |
| 1  | 1.287564000  | 4.892207000  | -2.594399000 |
| 1  | 2.149837000  | 4.905167000  | -1.063153000 |
| 1  | 3.023809000  | 4.658527000  | -2.571114000 |
| 7  | -0.236832000 | -0.530458000 | -2.993888000 |
| 1  | -0.343961000 | -0.755337000 | -3.983688000 |

[11c''<sub>PB</sub>]<sub>alt</sub> (TE = -3508.790101)

|   |              |             |             |
|---|--------------|-------------|-------------|
| 6 | -1.331513000 | 0.727816000 | 1.892268000 |
| 6 | -1.433652000 | 1.585094000 | 3.003640000 |
| 1 | -0.517572000 | 1.922661000 | 3.488656000 |
| 6 | -2.654787000 | 2.022195000 | 3.504589000 |
| 1 | -2.683532000 | 2.689308000 | 4.363901000 |
| 6 | -3.836843000 | 1.604599000 | 2.903985000 |
| 1 | -4.800298000 | 1.935603000 | 3.284989000 |
| 6 | -3.774873000 | 0.769063000 | 1.794996000 |
| 1 | -4.704192000 | 0.466178000 | 1.319120000 |
| 6 | -2.546168000 | 0.342422000 | 1.279108000 |

|    |              |              |              |
|----|--------------|--------------|--------------|
| 6  | 0.606557000  | -1.207780000 | 1.982540000  |
| 6  | 0.261558000  | -1.589936000 | 3.290421000  |
| 1  | -0.439134000 | -0.967839000 | 3.848621000  |
| 6  | 0.788619000  | -2.721960000 | 3.902104000  |
| 1  | 0.491151000  | -2.980693000 | 4.916555000  |
| 6  | 1.707991000  | -3.513778000 | 3.221940000  |
| 1  | 2.141434000  | -4.391381000 | 3.695949000  |
| 6  | 2.061754000  | -3.174808000 | 1.920973000  |
| 1  | 2.774178000  | -3.802021000 | 1.388589000  |
| 6  | 1.507300000  | -2.055350000 | 1.290793000  |
| 6  | 1.274116000  | 1.340713000  | 1.582573000  |
| 6  | 2.082827000  | 1.350716000  | 2.733070000  |
| 1  | 1.932819000  | 0.576832000  | 3.486471000  |
| 6  | 3.080125000  | 2.296643000  | 2.936541000  |
| 1  | 3.686179000  | 2.264525000  | 3.839982000  |
| 6  | 3.312402000  | 3.271814000  | 1.972716000  |
| 1  | 4.101049000  | 4.008580000  | 2.108415000  |
| 6  | 2.529546000  | 3.292889000  | 0.825276000  |
| 1  | 2.732718000  | 4.050348000  | 0.072428000  |
| 6  | 1.513789000  | 2.350241000  | 0.625408000  |
| 23 | -0.096019000 | -0.160930000 | -1.033891000 |
| 6  | -3.177940000 | -2.267851000 | 0.205940000  |
| 1  | -4.197491000 | -2.056593000 | 0.556990000  |
| 6  | 3.622381000  | -1.276056000 | -0.651154000 |
| 1  | 4.181281000  | -2.179503000 | -0.373208000 |
| 6  | -0.702186000 | 3.701889000  | -0.844844000 |
| 1  | -0.512126000 | 4.293297000  | -1.748864000 |
| 6  | -0.512440000 | 4.599062000  | 0.369585000  |
| 1  | -1.244772000 | 5.413762000  | 0.356876000  |
| 1  | -0.657293000 | 4.042492000  | 1.301917000  |
| 1  | 0.481358000  | 5.050970000  | 0.417364000  |
| 6  | -2.132361000 | 3.194201000  | -0.922179000 |
| 1  | -2.393287000 | 2.599016000  | -0.042065000 |
| 1  | -2.836865000 | 4.032062000  | -0.971723000 |
| 1  | -2.296081000 | 2.569993000  | -1.806762000 |
| 6  | -3.263336000 | -3.222376000 | -0.977435000 |
| 1  | -3.742462000 | -2.782713000 | -1.860088000 |
| 1  | -2.267498000 | -3.574178000 | -1.271885000 |
| 1  | -3.838248000 | -4.118801000 | -0.722739000 |
| 6  | -2.393781000 | -2.884445000 | 1.353163000  |
| 1  | -2.406911000 | -2.250932000 | 2.243507000  |
| 1  | -2.813397000 | -3.857570000 | 1.630105000  |
| 1  | -1.341677000 | -3.040200000 | 1.091878000  |
| 6  | 3.908838000  | -0.929890000 | -2.107678000 |
| 1  | 4.978115000  | -0.763087000 | -2.273619000 |
| 1  | 3.596716000  | -1.711752000 | -2.810997000 |

|    |              |              |              |
|----|--------------|--------------|--------------|
| 1  | 3.392682000  | -0.002660000 | -2.389326000 |
| 6  | 4.055744000  | -0.149220000 | 0.268353000  |
| 1  | 3.551788000  | 0.790320000  | 0.023362000  |
| 1  | 3.845654000  | -0.366656000 | 1.318338000  |
| 1  | 5.133262000  | 0.022964000  | 0.173052000  |
| 5  | 0.127740000  | 0.231157000  | 1.474776000  |
| 15 | -2.466876000 | -0.604150000 | -0.291959000 |
| 15 | 1.808904000  | -1.702394000 | -0.479168000 |
| 15 | 0.546805000  | 2.278060000  | -0.931712000 |
| 6  | 1.787223000  | -3.389273000 | -1.368895000 |
| 1  | 1.585549000  | -3.097344000 | -2.418178000 |
| 6  | 0.620091000  | -4.243607000 | -0.890235000 |
| 1  | 0.406681000  | -5.060314000 | -1.589403000 |
| 1  | 0.834437000  | -4.699952000 | 0.080021000  |
| 1  | -0.294474000 | -3.658645000 | -0.746909000 |
| 6  | 3.065276000  | -4.220834000 | -1.401794000 |
| 1  | 2.893979000  | -5.142562000 | -1.968913000 |
| 1  | 3.905717000  | -3.708218000 | -1.873178000 |
| 1  | 3.385858000  | -4.526961000 | -0.402838000 |
| 6  | -3.884058000 | 0.126082000  | -1.327128000 |
| 1  | -3.904331000 | 1.169139000  | -0.988468000 |
| 6  | -5.286274000 | -0.449813000 | -1.156711000 |
| 1  | -6.005748000 | 0.147325000  | -1.727587000 |
| 1  | -5.367965000 | -1.475370000 | -1.528169000 |
| 1  | -5.634451000 | -0.456490000 | -0.122961000 |
| 6  | -3.518064000 | 0.139386000  | -2.807438000 |
| 1  | -4.202172000 | 0.765731000  | -3.389941000 |
| 1  | -2.502553000 | 0.525344000  | -2.973477000 |
| 1  | -3.605519000 | -0.867452000 | -3.248838000 |
| 6  | 1.778374000  | 2.892961000  | -2.224302000 |
| 1  | 2.741200000  | 2.524207000  | -1.840341000 |
| 6  | 1.516597000  | 2.218613000  | -3.566070000 |
| 1  | 0.498699000  | 2.420621000  | -3.927532000 |
| 1  | 2.206374000  | 2.580909000  | -4.335949000 |
| 1  | 1.645864000  | 1.133635000  | -3.495623000 |
| 6  | 1.877620000  | 4.403021000  | -2.427217000 |
| 1  | 1.050583000  | 4.783548000  | -3.034720000 |
| 1  | 1.879093000  | 4.977051000  | -1.498256000 |
| 1  | 2.797694000  | 4.652774000  | -2.965996000 |
| 7  | -0.047988000 | -0.798482000 | -3.230546000 |
| 1  | 0.899472000  | -1.113535000 | -3.446149000 |
| 1  | -0.317318000 | -0.154747000 | -3.976931000 |
| 7  | -0.904479000 | -1.982396000 | -3.384826000 |
| 1  | -0.813455000 | -2.490899000 | -4.278969000 |
| 1  | -0.691146000 | -2.594131000 | -2.574245000 |
| 1  | -1.877831000 | -1.671646000 | -3.247857000 |

[11c''<sub>PB</sub>]<sub>dis</sub> (TE = -3452.390430)

|    |              |              |              |
|----|--------------|--------------|--------------|
| 6  | 1.719438000  | -0.901713000 | 1.649391000  |
| 6  | 1.937352000  | -1.791229000 | 2.716124000  |
| 1  | 1.078313000  | -2.221031000 | 3.228721000  |
| 6  | 3.213245000  | -2.123271000 | 3.157170000  |
| 1  | 3.337359000  | -2.809001000 | 3.992292000  |
| 6  | 4.327496000  | -1.573777000 | 2.533454000  |
| 1  | 5.330092000  | -1.817557000 | 2.876278000  |
| 6  | 4.149240000  | -0.727656000 | 1.444229000  |
| 1  | 5.026076000  | -0.332596000 | 0.935295000  |
| 6  | 2.870096000  | -0.399405000 | 0.988710000  |
| 6  | -0.065855000 | 1.149438000  | 1.597935000  |
| 6  | 0.713719000  | 1.650275000  | 2.670565000  |
| 1  | 1.589798000  | 1.092298000  | 2.988969000  |
| 6  | 0.368530000  | 2.786550000  | 3.387637000  |
| 1  | 0.980849000  | 3.097732000  | 4.230656000  |
| 6  | -0.758187000 | 3.515723000  | 3.028799000  |
| 1  | -1.046965000 | 4.401986000  | 3.588724000  |
| 6  | -1.506554000 | 3.107443000  | 1.933771000  |
| 1  | -2.367481000 | 3.699743000  | 1.633695000  |
| 6  | -1.190360000 | 1.948347000  | 1.217589000  |
| 6  | -0.950560000 | -1.412931000 | 1.710966000  |
| 6  | -1.456419000 | -1.532710000 | 3.014127000  |
| 1  | -1.067600000 | -0.886258000 | 3.801869000  |
| 6  | -2.454979000 | -2.449943000 | 3.319525000  |
| 1  | -2.837419000 | -2.518439000 | 4.335590000  |
| 6  | -2.971327000 | -3.277720000 | 2.325255000  |
| 1  | -3.751534000 | -3.997232000 | 2.561132000  |
| 6  | -2.494537000 | -3.171565000 | 1.025192000  |
| 1  | -2.915098000 | -3.807922000 | 0.250368000  |
| 6  | -1.495147000 | -2.241944000 | 0.716519000  |
| 23 | 0.105527000  | 0.470717000  | -0.965402000 |
| 6  | 3.428608000  | 2.150739000  | -0.501695000 |
| 1  | 4.500538000  | 1.974079000  | -0.339257000 |
| 6  | -3.856182000 | 1.292897000  | 0.126055000  |
| 1  | -4.171032000 | 2.251138000  | 0.563958000  |
| 6  | 0.165284000  | -3.363454000 | -1.462583000 |
| 1  | 0.175046000  | -3.322070000 | -2.563120000 |
| 6  | -0.350064000 | -4.720783000 | -0.998776000 |
| 1  | 0.332329000  | -5.504927000 | -1.342925000 |
| 1  | -0.372707000 | -4.775903000 | 0.093759000  |
| 1  | -1.342592000 | -4.976679000 | -1.365288000 |
| 6  | 1.585066000  | -3.171713000 | -0.951479000 |
| 1  | 1.634613000  | -3.274826000 | 0.137363000  |
| 1  | 2.257628000  | -3.920641000 | -1.382133000 |

|    |              |              |              |
|----|--------------|--------------|--------------|
| 1  | 1.973701000  | -2.186468000 | -1.200175000 |
| 6  | 3.234229000  | 2.879426000  | -1.827909000 |
| 1  | 3.585027000  | 2.310184000  | -2.693277000 |
| 1  | 2.177274000  | 3.107614000  | -1.998045000 |
| 1  | 3.778728000  | 3.828817000  | -1.825562000 |
| 6  | 2.898058000  | 2.985917000  | 0.650369000  |
| 1  | 3.057918000  | 2.507796000  | 1.619773000  |
| 1  | 3.405242000  | 3.956006000  | 0.673890000  |
| 1  | 1.825056000  | 3.186033000  | 0.548944000  |
| 6  | -4.702117000 | 1.015110000  | -1.111634000 |
| 1  | -5.766534000 | 1.053374000  | -0.860531000 |
| 1  | -4.535469000 | 1.727550000  | -1.924812000 |
| 1  | -4.505448000 | 0.017090000  | -1.512968000 |
| 6  | -4.023408000 | 0.214684000  | 1.181430000  |
| 1  | -3.736092000 | -0.772237000 | 0.808826000  |
| 1  | -3.429581000 | 0.412796000  | 2.077454000  |
| 1  | -5.072694000 | 0.151745000  | 1.487365000  |
| 5  | 0.233671000  | -0.416645000 | 1.387481000  |
| 15 | 2.635179000  | 0.466470000  | -0.605481000 |
| 15 | -2.077137000 | 1.589732000  | -0.343896000 |
| 15 | -0.882625000 | -1.895258000 | -0.962875000 |
| 6  | -2.158921000 | 3.233383000  | -1.270775000 |
| 1  | -2.279710000 | 2.890601000  | -2.310659000 |
| 6  | -0.835833000 | 3.987884000  | -1.186820000 |
| 1  | -0.820802000 | 4.800348000  | -1.919903000 |
| 1  | -0.691019000 | 4.439025000  | -0.200797000 |
| 1  | 0.024481000  | 3.346688000  | -1.395804000 |
| 6  | -3.322167000 | 4.168634000  | -0.957893000 |
| 1  | -3.284615000 | 5.026906000  | -1.636725000 |
| 1  | -4.304994000 | 3.711449000  | -1.083372000 |
| 1  | -3.272975000 | 4.577306000  | 0.055172000  |
| 6  | 3.783542000  | -0.476831000 | -1.778645000 |
| 1  | 3.839478000  | -1.467348000 | -1.310948000 |
| 6  | 5.210513000  | 0.047823000  | -1.890249000 |
| 1  | 5.799050000  | -0.638807000 | -2.507333000 |
| 1  | 5.264630000  | 1.026708000  | -2.373678000 |
| 1  | 5.723949000  | 0.126007000  | -0.929663000 |
| 6  | 3.163035000  | -0.639811000 | -3.162321000 |
| 1  | 3.750430000  | -1.342516000 | -3.762179000 |
| 1  | 2.133867000  | -1.011114000 | -3.124962000 |
| 1  | 3.150417000  | 0.305818000  | -3.715919000 |
| 6  | -2.417398000 | -1.934222000 | -2.051260000 |
| 1  | -3.187499000 | -1.543940000 | -1.370088000 |
| 6  | -2.286097000 | -0.977360000 | -3.230602000 |
| 1  | -1.429945000 | -1.224243000 | -3.867619000 |
| 1  | -3.183421000 | -1.025659000 | -3.856093000 |



|   |              |              |              |
|---|--------------|--------------|--------------|
| 1 | -2.164033000 | 0.057558000  | -2.906224000 |
| 6 | -2.872738000 | -3.299525000 | -2.552527000 |
| 1 | -2.122314000 | -3.775565000 | -3.190986000 |
| 1 | -3.128472000 | -3.998414000 | -1.755734000 |
| 1 | -3.772277000 | -3.175644000 | -3.164229000 |
| 7 | 0.268146000  | 1.120703000  | -2.748397000 |
| 1 | 1.124764000  | 1.185170000  | -3.291267000 |
| 1 | -0.491697000 | 1.374879000  | -3.376290000 |

[12c''<sub>PB</sub>] (TE = -3452.541427)

|    |              |              |              |
|----|--------------|--------------|--------------|
| 6  | -1.533800000 | 0.200426000  | 1.871805000  |
| 6  | -1.727398000 | 0.786433000  | 3.137239000  |
| 1  | -0.852402000 | 1.087774000  | 3.713379000  |
| 6  | -2.988049000 | 1.007516000  | 3.680040000  |
| 1  | -3.084984000 | 1.467965000  | 4.661914000  |
| 6  | -4.122629000 | 0.646320000  | 2.961625000  |
| 1  | -5.116665000 | 0.818736000  | 3.369269000  |
| 6  | -3.971812000 | 0.074062000  | 1.704469000  |
| 1  | -4.863001000 | -0.186399000 | 1.137803000  |
| 6  | -2.703304000 | -0.145100000 | 1.154961000  |
| 6  | 0.684517000  | -1.420603000 | 1.744682000  |
| 6  | 0.351505000  | -2.068444000 | 2.947489000  |
| 1  | -0.506524000 | -1.706136000 | 3.515336000  |
| 6  | 1.087338000  | -3.136536000 | 3.448481000  |
| 1  | 0.792621000  | -3.610103000 | 4.383742000  |
| 6  | 2.214063000  | -3.583534000 | 2.765147000  |
| 1  | 2.812836000  | -4.402434000 | 3.158485000  |
| 6  | 2.557711000  | -2.980959000 | 1.559750000  |
| 1  | 3.430561000  | -3.342912000 | 1.020676000  |
| 6  | 1.793884000  | -1.936468000 | 1.029006000  |
| 6  | 0.951245000  | 1.203983000  | 1.685141000  |
| 6  | 1.677819000  | 1.193867000  | 2.891202000  |
| 1  | 1.607030000  | 0.318208000  | 3.537623000  |
| 6  | 2.495789000  | 2.246265000  | 3.280473000  |
| 1  | 3.043419000  | 2.193109000  | 4.220147000  |
| 6  | 2.623489000  | 3.362406000  | 2.459214000  |
| 1  | 3.268391000  | 4.190883000  | 2.744923000  |
| 6  | 1.927348000  | 3.403209000  | 1.258525000  |
| 1  | 2.047067000  | 4.270653000  | 0.616263000  |
| 6  | 1.099258000  | 2.343427000  | 0.864851000  |
| 23 | -0.145227000 | -0.200491000 | -1.253793000 |
| 6  | -2.894597000 | -2.600839000 | -0.401170000 |
| 1  | -3.940384000 | -2.657504000 | -0.066197000 |
| 6  | 3.833946000  | -0.639979000 | -0.665136000 |
| 1  | 4.475869000  | -1.493578000 | -0.404180000 |
| 6  | -1.043131000 | 3.581883000  | -0.799732000 |

|    |              |              |              |
|----|--------------|--------------|--------------|
| 1  | -1.059705000 | 3.913782000  | -1.849450000 |
| 6  | -0.777797000 | 4.782299000  | 0.097671000  |
| 1  | -1.586915000 | 5.514481000  | -0.005663000 |
| 1  | -0.742311000 | 4.485343000  | 1.150776000  |
| 1  | 0.156316000  | 5.299578000  | -0.127277000 |
| 6  | -2.399711000 | 2.977408000  | -0.478107000 |
| 1  | -2.434937000 | 2.576953000  | 0.540365000  |
| 1  | -3.191804000 | 3.730339000  | -0.562150000 |
| 1  | -2.639668000 | 2.161266000  | -1.160682000 |
| 6  | -2.762221000 | -3.289531000 | -1.753546000 |
| 1  | -3.426846000 | -2.869862000 | -2.514579000 |
| 1  | -1.743239000 | -3.201203000 | -2.141217000 |
| 1  | -2.997522000 | -4.356608000 | -1.670776000 |
| 6  | -2.022785000 | -3.270642000 | 0.649477000  |
| 1  | -2.140656000 | -2.813862000 | 1.635943000  |
| 1  | -2.281452000 | -4.331823000 | 0.740016000  |
| 1  | -0.959738000 | -3.213655000 | 0.397190000  |
| 6  | 4.192673000  | -0.152697000 | -2.064057000 |
| 1  | 5.234558000  | 0.183485000  | -2.107430000 |
| 1  | 4.066257000  | -0.919468000 | -2.834464000 |
| 1  | 3.565007000  | 0.697037000  | -2.355029000 |
| 6  | 4.057419000  | 0.447089000  | 0.370950000  |
| 1  | 3.452963000  | 1.335695000  | 0.166948000  |
| 1  | 3.808019000  | 0.114371000  | 1.381758000  |
| 1  | 5.107516000  | 0.761053000  | 0.372289000  |
| 5  | -0.023542000 | -0.036255000 | 1.387521000  |
| 7  | -0.265353000 | -1.027995000 | -3.009758000 |
| 15 | 0.296048000  | 2.260614000  | -0.775641000 |
| 15 | -2.501437000 | -0.775857000 | -0.551572000 |
| 15 | 2.084217000  | -1.297538000 | -0.667812000 |
| 6  | 1.562677000  | 2.924509000  | -2.001858000 |
| 1  | 2.508303000  | 2.495516000  | -1.637935000 |
| 6  | 1.732952000  | 4.434460000  | -2.123535000 |
| 1  | 2.485259000  | 4.659697000  | -2.888028000 |
| 1  | 0.808766000  | 4.927012000  | -2.442733000 |
| 1  | 2.065526000  | 4.919060000  | -1.204421000 |
| 6  | 1.259772000  | 2.336529000  | -3.377752000 |
| 1  | 1.207174000  | 1.244036000  | -3.367989000 |
| 1  | 0.295334000  | 2.693744000  | -3.760627000 |
| 1  | 2.022758000  | 2.638097000  | -4.104504000 |
| 6  | 2.295656000  | -2.837274000 | -1.748158000 |
| 1  | 2.146748000  | -2.424224000 | -2.757144000 |
| 6  | 1.168578000  | -3.826579000 | -1.490830000 |
| 1  | 0.193668000  | -3.340821000 | -1.554289000 |
| 1  | 1.186863000  | -4.634162000 | -2.231373000 |
| 1  | 1.255234000  | -4.286962000 | -0.500828000 |

|   |              |              |              |
|---|--------------|--------------|--------------|
| 6 | 3.641563000  | -3.553939000 | -1.749572000 |
| 1 | 3.622472000  | -4.357841000 | -2.494628000 |
| 1 | 4.485362000  | -2.909463000 | -2.005124000 |
| 1 | 3.865689000  | -4.030154000 | -0.791453000 |
| 6 | -4.008544000 | -0.111121000 | -1.483136000 |
| 1 | -4.212354000 | 0.839954000  | -0.973499000 |
| 6 | -5.290133000 | -0.936647000 | -1.441332000 |
| 1 | -6.103071000 | -0.385041000 | -1.927337000 |
| 1 | -5.192089000 | -1.884415000 | -1.978059000 |
| 1 | -5.627025000 | -1.174191000 | -0.429618000 |
| 6 | -3.626175000 | 0.196352000  | -2.928152000 |
| 1 | -2.712624000 | 0.797348000  | -2.999787000 |
| 1 | -3.447627000 | -0.722229000 | -3.499203000 |
| 1 | -4.429309000 | 0.737312000  | -3.441149000 |
| 1 | -1.114718000 | -1.195823000 | -3.542986000 |
| 1 | 0.500245000  | -1.386675000 | -3.576496000 |

[13c''<sub>PB</sub>] (TE = -3452.987807)

|   |              |              |             |
|---|--------------|--------------|-------------|
| 6 | 1.554535000  | -0.272491000 | 1.900747000 |
| 6 | 1.683864000  | -0.791264000 | 3.202781000 |
| 1 | 0.783670000  | -0.953898000 | 3.794892000 |
| 6 | 2.914493000  | -1.109656000 | 3.764200000 |
| 1 | 2.962523000  | -1.508808000 | 4.775245000 |
| 6 | 4.081970000  | -0.925654000 | 3.030306000 |
| 1 | 5.050587000  | -1.175494000 | 3.456559000 |
| 6 | 3.994269000  | -0.430387000 | 1.736517000 |
| 1 | 4.907053000  | -0.306283000 | 1.156286000 |
| 6 | 2.754404000  | -0.109267000 | 1.171578000 |
| 6 | -0.414768000 | 1.617622000  | 1.623369000 |
| 6 | 0.115445000  | 2.369948000  | 2.687648000 |
| 1 | 0.992794000  | 1.990705000  | 3.211375000 |
| 6 | -0.468306000 | 3.554364000  | 3.120540000 |
| 1 | -0.034162000 | 4.100566000  | 3.955530000 |
| 6 | -1.627293000 | 4.024958000  | 2.509238000 |
| 1 | -2.109868000 | 4.932353000  | 2.864389000 |
| 6 | -2.157187000 | 3.329333000  | 1.428321000 |
| 1 | -3.058320000 | 3.704819000  | 0.947903000 |
| 6 | -1.547921000 | 2.159877000  | 0.962441000 |
| 6 | -1.064928000 | -0.947206000 | 1.756755000 |
| 6 | -1.757129000 | -0.796252000 | 2.972873000 |
| 1 | -1.539205000 | 0.070565000  | 3.598346000 |
| 6 | -2.718218000 | -1.704472000 | 3.398140000 |
| 1 | -3.229626000 | -1.551007000 | 4.346308000 |
| 6 | -3.037835000 | -2.801670000 | 2.603213000 |
| 1 | -3.795747000 | -3.513455000 | 2.921571000 |
| 6 | -2.389482000 | -2.970584000 | 1.387886000 |

|    |              |              |              |
|----|--------------|--------------|--------------|
| 1  | -2.659571000 | -3.815437000 | 0.758665000  |
| 6  | -1.411701000 | -2.060791000 | 0.964412000  |
| 23 | 0.166827000  | 0.174555000  | -1.112063000 |
| 6  | 3.371530000  | 2.142996000  | -0.602713000 |
| 1  | 4.426552000  | 2.027374000  | -0.319797000 |
| 6  | -3.880902000 | 1.101278000  | -0.528238000 |
| 1  | -4.306841000 | 2.091890000  | -0.310479000 |
| 6  | 0.489996000  | -3.672913000 | -0.631588000 |
| 1  | 0.615183000  | -3.954030000 | -1.689694000 |
| 6  | -0.030692000 | -4.868806000 | 0.156040000  |
| 1  | 0.697971000  | -5.684684000 | 0.104464000  |
| 1  | -0.152710000 | -4.615951000 | 1.213287000  |
| 1  | -0.979856000 | -5.264873000 | -0.202503000 |
| 6  | 1.843118000  | -3.259378000 | -0.071847000 |
| 1  | 1.765551000  | -2.947194000 | 0.974994000  |
| 1  | 2.551139000  | -4.093539000 | -0.112131000 |
| 1  | 2.273875000  | -2.427416000 | -0.626843000 |
| 6  | 3.300238000  | 2.738417000  | -2.004848000 |
| 1  | 3.700610000  | 2.077824000  | -2.780300000 |
| 1  | 2.269971000  | 2.987468000  | -2.280606000 |
| 1  | 3.868648000  | 3.672284000  | -2.058562000 |
| 6  | 2.697408000  | 3.043242000  | 0.420673000  |
| 1  | 2.810271000  | 2.664040000  | 1.439308000  |
| 1  | 3.130754000  | 4.048222000  | 0.389358000  |
| 1  | 1.623137000  | 3.146268000  | 0.235058000  |
| 6  | -4.415080000 | 0.621629000  | -1.871530000 |
| 1  | -5.505283000 | 0.531775000  | -1.840759000 |
| 1  | -4.171705000 | 1.296469000  | -2.698062000 |
| 1  | -4.020507000 | -0.367110000 | -2.128020000 |
| 6  | -4.256227000 | 0.160895000  | 0.605086000  |
| 1  | -3.850766000 | -0.844403000 | 0.453346000  |
| 1  | -3.890843000 | 0.514051000  | 1.572670000  |
| 1  | -5.344714000 | 0.067132000  | 0.674355000  |
| 5  | 0.080725000  | 0.118701000  | 1.414042000  |
| 15 | 2.653198000  | 0.420270000  | -0.571658000 |
| 15 | -2.046409000 | 1.381346000  | -0.615086000 |
| 15 | -0.639282000 | -2.178975000 | -0.681906000 |
| 6  | -1.894261000 | 2.771830000  | -1.873286000 |
| 1  | -1.967227000 | 2.235820000  | -2.832932000 |
| 6  | -0.495485000 | 3.364232000  | -1.752510000 |
| 1  | -0.231743000 | 3.976156000  | -2.622054000 |
| 1  | -0.408827000 | 3.995402000  | -0.862641000 |
| 1  | 0.290678000  | 2.599744000  | -1.655743000 |
| 6  | -2.944756000 | 3.872273000  | -1.885326000 |
| 1  | -2.778014000 | 4.538630000  | -2.738659000 |
| 1  | -3.964616000 | 3.491238000  | -1.976045000 |

|   |              |              |              |
|---|--------------|--------------|--------------|
| 1 | -2.895342000 | 4.495410000  | -0.989455000 |
| 6 | 3.944786000  | -0.620687000 | -1.475211000 |
| 1 | 4.034590000  | -1.508505000 | -0.837070000 |
| 6 | 5.338773000  | -0.019512000 | -1.610351000 |
| 1 | 6.011904000  | -0.754786000 | -2.063120000 |
| 1 | 5.359575000  | 0.863074000  | -2.255137000 |
| 1 | 5.780449000  | 0.266043000  | -0.653036000 |
| 6 | 3.412372000  | -1.067884000 | -2.833394000 |
| 1 | 4.095533000  | -1.780897000 | -3.305828000 |
| 1 | 2.432373000  | -1.555009000 | -2.752579000 |
| 1 | 3.311228000  | -0.224781000 | -3.527520000 |
| 6 | -2.046504000 | -2.619371000 | -1.854375000 |
| 1 | -2.914279000 | -2.128574000 | -1.388772000 |
| 6 | -1.799242000 | -1.960471000 | -3.208516000 |
| 1 | -0.865769000 | -2.312574000 | -3.666704000 |
| 1 | -2.605924000 | -2.195176000 | -3.910623000 |
| 1 | -1.746147000 | -0.870849000 | -3.123348000 |
| 6 | -2.376040000 | -4.093309000 | -2.050149000 |
| 1 | -1.523550000 | -4.660490000 | -2.436883000 |
| 1 | -2.718600000 | -4.586187000 | -1.139686000 |
| 1 | -3.181544000 | -4.194970000 | -2.784947000 |
| 7 | 0.417470000  | 0.570148000  | -3.342410000 |
| 1 | -0.377556000 | 0.961747000  | -3.843650000 |
| 1 | 1.198237000  | 1.185482000  | -3.563620000 |
| 1 | 0.629018000  | -0.300314000 | -3.825517000 |

[14c''<sub>PB</sub>] (TE = -3453.112714)

|   |              |              |             |
|---|--------------|--------------|-------------|
| 6 | 1.418563000  | -0.557239000 | 1.832685000 |
| 6 | 1.541898000  | -1.289400000 | 3.028031000 |
| 1 | 0.636352000  | -1.538007000 | 3.582706000 |
| 6 | 2.769137000  | -1.713302000 | 3.527601000 |
| 1 | 2.813500000  | -2.283536000 | 4.454251000 |
| 6 | 3.936762000  | -1.404304000 | 2.839277000 |
| 1 | 4.905819000  | -1.724702000 | 3.217109000 |
| 6 | 3.851309000  | -0.694343000 | 1.646322000 |
| 1 | 4.767638000  | -0.478107000 | 1.101915000 |
| 6 | 2.616808000  | -0.285356000 | 1.129336000 |
| 6 | -0.417567000 | 1.456226000  | 1.808522000 |
| 6 | 0.013520000  | 1.939723000  | 3.056347000 |
| 1 | 0.690354000  | 1.322172000  | 3.648700000 |
| 6 | -0.388169000 | 3.171122000  | 3.564256000 |
| 1 | -0.020850000 | 3.507614000  | 4.532704000 |
| 6 | -1.267835000 | 3.965126000  | 2.836883000 |
| 1 | -1.601707000 | 4.924750000  | 3.226754000 |
| 6 | -1.709635000 | 3.522120000  | 1.594207000 |
| 1 | -2.389156000 | 4.151663000  | 1.023382000 |

|    |              |              |              |
|----|--------------|--------------|--------------|
| 6  | -1.279159000 | 2.301333000  | 1.063073000  |
| 6  | -1.225122000 | -1.088124000 | 1.683929000  |
| 6  | -1.956707000 | -0.963555000 | 2.878922000  |
| 1  | -1.707055000 | -0.149651000 | 3.561082000  |
| 6  | -3.003767000 | -1.815517000 | 3.210992000  |
| 1  | -3.548545000 | -1.674679000 | 4.143366000  |
| 6  | -3.364305000 | -2.834130000 | 2.335763000  |
| 1  | -4.194900000 | -3.497969000 | 2.568261000  |
| 6  | -2.655811000 | -2.992276000 | 1.150583000  |
| 1  | -2.959079000 | -3.782126000 | 0.467639000  |
| 6  | -1.591714000 | -2.144003000 | 0.818814000  |
| 23 | 0.080412000  | 0.090178000  | -1.144174000 |
| 6  | 3.304115000  | 2.137876000  | -0.322125000 |
| 1  | 4.335982000  | 1.947799000  | 0.007062000  |
| 6  | -3.529920000 | 1.484799000  | -0.656945000 |
| 1  | -4.007460000 | 2.446960000  | -0.425280000 |
| 6  | 0.418021000  | -3.769486000 | -0.637799000 |
| 1  | 0.217411000  | -4.360836000 | -1.541311000 |
| 6  | 0.136483000  | -4.634462000 | 0.582211000  |
| 1  | 0.800398000  | -5.507055000 | 0.593206000  |
| 1  | 0.312250000  | -4.078604000 | 1.509605000  |
| 1  | -0.891090000 | -5.003260000 | 0.623730000  |
| 6  | 1.882753000  | -3.364844000 | -0.674182000 |
| 1  | 2.152843000  | -2.737215000 | 0.181237000  |
| 1  | 2.529577000  | -4.250150000 | -0.649479000 |
| 1  | 2.121404000  | -2.801413000 | -1.579877000 |
| 6  | 3.339114000  | 2.892454000  | -1.644870000 |
| 1  | 3.896763000  | 2.366599000  | -2.424993000 |
| 1  | 2.327991000  | 3.057193000  | -2.031100000 |
| 1  | 3.800465000  | 3.879541000  | -1.526405000 |
| 6  | 2.596093000  | 2.939591000  | 0.759343000  |
| 1  | 2.636754000  | 2.438556000  | 1.730576000  |
| 1  | 3.054971000  | 3.928599000  | 0.873479000  |
| 1  | 1.536841000  | 3.091512000  | 0.527488000  |
| 6  | -3.952882000 | 1.028375000  | -2.047552000 |
| 1  | -5.039407000 | 0.900982000  | -2.112368000 |
| 1  | -3.660505000 | 1.725057000  | -2.841272000 |
| 1  | -3.497258000 | 0.057636000  | -2.281821000 |
| 6  | -3.963288000 | 0.477560000  | 0.391903000  |
| 1  | -3.539793000 | -0.512419000 | 0.198349000  |
| 1  | -3.656774000 | 0.768833000  | 1.399866000  |
| 1  | -5.054508000 | 0.372031000  | 0.391994000  |
| 5  | -0.037421000 | -0.049084000 | 1.411994000  |
| 15 | 2.489984000  | 0.459971000  | -0.548100000 |
| 15 | -1.678308000 | 1.794184000  | -0.654766000 |
| 15 | -0.724659000 | -2.257400000 | -0.800911000 |

|   |              |              |              |
|---|--------------|--------------|--------------|
| 6 | -1.629271000 | 3.369471000  | -1.718205000 |
| 1 | -1.547897000 | 2.946373000  | -2.732797000 |
| 6 | -0.353052000 | 4.153704000  | -1.455856000 |
| 1 | -0.204206000 | 4.931439000  | -2.213528000 |
| 1 | -0.376403000 | 4.648104000  | -0.479391000 |
| 1 | 0.524000000  | 3.503163000  | -1.461252000 |
| 6 | -2.836864000 | 4.301233000  | -1.729958000 |
| 1 | -2.658776000 | 5.127140000  | -2.429057000 |
| 1 | -3.760225000 | 3.812565000  | -2.048350000 |
| 1 | -3.028028000 | 4.758187000  | -0.755199000 |
| 6 | 3.818977000  | -0.477405000 | -1.533637000 |
| 1 | 3.814897000  | -1.464868000 | -1.053742000 |
| 6 | 5.253336000  | 0.041560000  | -1.508865000 |
| 1 | 5.915794000  | -0.671185000 | -2.014106000 |
| 1 | 5.363743000  | 0.994046000  | -2.034893000 |
| 1 | 5.653083000  | 0.184680000  | -0.503020000 |
| 6 | 3.359632000  | -0.660720000 | -2.976273000 |
| 1 | 4.050838000  | -1.302215000 | -3.535278000 |
| 1 | 2.365547000  | -1.118874000 | -3.023140000 |
| 1 | 3.309747000  | 0.296165000  | -3.511464000 |
| 6 | -2.072556000 | -2.910183000 | -1.958741000 |
| 1 | -2.984407000 | -2.440809000 | -1.558972000 |
| 6 | -1.833558000 | -2.363292000 | -3.361777000 |
| 1 | -0.869451000 | -2.703945000 | -3.763526000 |
| 1 | -2.609280000 | -2.700347000 | -4.059406000 |
| 1 | -1.825362000 | -1.269732000 | -3.369744000 |
| 6 | -2.289458000 | -4.418597000 | -2.035307000 |
| 1 | -1.492506000 | -4.911488000 | -2.601506000 |
| 1 | -2.340101000 | -4.912237000 | -1.062719000 |
| 1 | -3.224767000 | -4.642034000 | -2.561331000 |
| 7 | 0.152782000  | 0.553012000  | -3.376369000 |
| 1 | -0.751525000 | 0.825970000  | -3.753891000 |
| 1 | 0.772707000  | 1.338321000  | -3.559839000 |
| 1 | 0.480970000  | -0.197673000 | -3.978577000 |

Cartesian coordinates of  $[5f''_{SB}]-[14f''_{SB}]$ , along with their total energies (in hartree) including zero point vibrational correction at M06-L-D3(heptane)/6-311+G\* level of theory.

$[5f''_{SB}]_{alt}$  (TE = -3322.249460)

|   |             |              |             |
|---|-------------|--------------|-------------|
| 6 | 1.430079000 | 0.268980000  | 1.582946000 |
| 6 | 1.737640000 | -0.139990000 | 2.892937000 |
| 1 | 0.951743000 | -0.587288000 | 3.502066000 |
| 6 | 3.008733000 | 0.008304000  | 3.436366000 |
| 1 | 3.202333000 | -0.316401000 | 4.456084000 |

|    |              |              |              |
|----|--------------|--------------|--------------|
| 6  | 4.035806000  | 0.557093000  | 2.673873000  |
| 1  | 5.035042000  | 0.664519000  | 3.087743000  |
| 6  | 3.782764000  | 0.938601000  | 1.362958000  |
| 1  | 4.584288000  | 1.326390000  | 0.737770000  |
| 6  | 2.494993000  | 0.800128000  | 0.841598000  |
| 6  | -1.094087000 | 1.294478000  | 1.419771000  |
| 6  | -1.015247000 | 2.008933000  | 2.626298000  |
| 1  | -0.156528000 | 1.847937000  | 3.277947000  |
| 6  | -2.012660000 | 2.892536000  | 3.023774000  |
| 1  | -1.923829000 | 3.419083000  | 3.971160000  |
| 6  | -3.124146000 | 3.107294000  | 2.212932000  |
| 1  | -3.902895000 | 3.801983000  | 2.516676000  |
| 6  | -3.214289000 | 2.461112000  | 0.985498000  |
| 1  | -4.045766000 | 2.668347000  | 0.315212000  |
| 6  | -2.209607000 | 1.571572000  | 0.611920000  |
| 6  | -0.721619000 | -1.326726000 | 1.220943000  |
| 6  | -1.583363000 | -1.576272000 | 2.304365000  |
| 1  | -1.829793000 | -0.755653000 | 2.977936000  |
| 6  | -2.136448000 | -2.829608000 | 2.541441000  |
| 1  | -2.792374000 | -2.977965000 | 3.396321000  |
| 6  | -1.868652000 | -3.887294000 | 1.678252000  |
| 1  | -2.311736000 | -4.865469000 | 1.846141000  |
| 6  | -1.035629000 | -3.680434000 | 0.585173000  |
| 1  | -0.827376000 | -4.489228000 | -0.111641000 |
| 6  | -0.464598000 | -2.423714000 | 0.380910000  |
| 16 | 0.540322000  | -2.204142000 | -1.086440000 |
| 16 | 2.272536000  | 1.172558000  | -0.898827000 |
| 16 | -2.177289000 | 0.934394000  | -1.059175000 |
| 23 | 0.094136000  | 0.173710000  | -1.553816000 |
| 6  | 2.111185000  | 3.038285000  | -0.959505000 |
| 1  | 3.106026000  | 3.379363000  | -0.648707000 |
| 6  | -3.680259000 | -0.143978000 | -1.334717000 |
| 1  | -4.494733000 | 0.576304000  | -1.471730000 |
| 6  | 2.298308000  | -2.505130000 | -0.504322000 |
| 1  | 2.507536000  | -1.712472000 | 0.220012000  |
| 6  | 3.183329000  | -2.365000000 | -1.725724000 |
| 1  | 4.232639000  | -2.465927000 | -1.433517000 |
| 1  | 2.974110000  | -3.144489000 | -2.464918000 |
| 1  | 3.075791000  | -1.391813000 | -2.214092000 |
| 6  | 2.396230000  | -3.858799000 | 0.160063000  |
| 1  | 2.125306000  | -4.668543000 | -0.524710000 |
| 1  | 3.427993000  | -4.030020000 | 0.482632000  |
| 1  | 1.761567000  | -3.932121000 | 1.046219000  |
| 6  | 1.859760000  | 3.410136000  | -2.406374000 |
| 1  | 2.614234000  | 3.000576000  | -3.082722000 |
| 1  | 0.877434000  | 3.070340000  | -2.753865000 |



|   |              |              |              |
|---|--------------|--------------|--------------|
| 1 | 1.874861000  | 4.498397000  | -2.513941000 |
| 6 | 1.058603000  | 3.560344000  | -0.011261000 |
| 1 | 1.217876000  | 3.223983000  | 1.016212000  |
| 1 | 1.081146000  | 4.655010000  | -0.007717000 |
| 1 | 0.049774000  | 3.256271000  | -0.311578000 |
| 6 | -3.424311000 | -0.891431000 | -2.627427000 |
| 1 | -4.308300000 | -1.477752000 | -2.893442000 |
| 1 | -3.206036000 | -0.222110000 | -3.463738000 |
| 1 | -2.585752000 | -1.589319000 | -2.517223000 |
| 6 | -3.958739000 | -1.050416000 | -0.161069000 |
| 1 | -3.183789000 | -1.813017000 | -0.049355000 |
| 1 | -4.037323000 | -0.503669000 | 0.781879000  |
| 1 | -4.911760000 | -1.564248000 | -0.324524000 |
| 5 | -0.076792000 | 0.123676000  | 1.099376000  |
| 7 | -0.104522000 | 0.849947000  | -4.352709000 |
| 7 | 0.161406000  | -0.121691000 | -3.562682000 |
| 1 | -0.041447000 | 0.549588000  | -5.338135000 |
| 1 | 0.388606000  | -1.021099000 | -4.016462000 |

$[5f'_{SB}]_{dis}$  (TE = -3322.260350)

|   |              |              |              |
|---|--------------|--------------|--------------|
| 6 | -0.140609000 | 1.317143000  | -1.668972000 |
| 6 | -0.882531000 | 1.735071000  | -2.788713000 |
| 1 | -1.655847000 | 1.076975000  | -3.185708000 |
| 6 | -0.645238000 | 2.952613000  | -3.415942000 |
| 1 | -1.229391000 | 3.235707000  | -4.288087000 |
| 6 | 0.325000000  | 3.813410000  | -2.914122000 |
| 1 | 0.507223000  | 4.775106000  | -3.386754000 |
| 6 | 1.033121000  | 3.457981000  | -1.772800000 |
| 1 | 1.744113000  | 4.154470000  | -1.333032000 |
| 6 | 0.812438000  | 2.219310000  | -1.170087000 |
| 6 | 0.749860000  | -1.224066000 | -1.656042000 |
| 6 | 1.060701000  | -1.323801000 | -3.022840000 |
| 1 | 0.635629000  | -0.599867000 | -3.718717000 |
| 6 | 1.885035000  | -2.330404000 | -3.511949000 |
| 1 | 2.097192000  | -2.386493000 | -4.576785000 |
| 6 | 2.452518000  | -3.253241000 | -2.638103000 |
| 1 | 3.110221000  | -4.033486000 | -3.012276000 |
| 6 | 2.209477000  | -3.148262000 | -1.274583000 |
| 1 | 2.698710000  | -3.823988000 | -0.576369000 |
| 6 | 1.356593000  | -2.151381000 | -0.800591000 |
| 6 | -1.810055000 | -0.719688000 | -1.025850000 |
| 6 | -2.355695000 | -1.563894000 | -2.006971000 |
| 1 | -1.726910000 | -1.885200000 | -2.837137000 |
| 6 | -3.676790000 | -1.992174000 | -1.950966000 |
| 1 | -4.072508000 | -2.633132000 | -2.734907000 |
| 6 | -4.481695000 | -1.627205000 | -0.876553000 |

|    |              |              |              |
|----|--------------|--------------|--------------|
| 1  | -5.505273000 | -1.986400000 | -0.808604000 |
| 6  | -3.958746000 | -0.836901000 | 0.140402000  |
| 1  | -4.555809000 | -0.613761000 | 1.020155000  |
| 6  | -2.647523000 | -0.370106000 | 0.044653000  |
| 16 | -1.917846000 | 0.470918000  | 1.448405000  |
| 16 | 1.611072000  | 1.940325000  | 0.409551000  |
| 16 | 1.234099000  | -1.923078000 | 0.969139000  |
| 23 | 0.486495000  | 0.295945000  | 1.852657000  |
| 6  | 3.413134000  | 1.676297000  | -0.019648000 |
| 1  | 3.709614000  | 2.653670000  | -0.419195000 |
| 6  | 0.240884000  | -3.381801000 | 1.586371000  |
| 1  | 0.922544000  | -4.229443000 | 1.449154000  |
| 6  | -2.698493000 | 2.169152000  | 1.555521000  |
| 1  | -2.145124000 | 2.565813000  | 2.416512000  |
| 6  | -4.173107000 | 2.073215000  | 1.883113000  |
| 1  | -4.556918000 | 3.071981000  | 2.112637000  |
| 1  | -4.748952000 | 1.701324000  | 1.031171000  |
| 1  | -4.373243000 | 1.433294000  | 2.745369000  |
| 6  | -2.419213000 | 2.992102000  | 0.319427000  |
| 1  | -2.837939000 | 2.523293000  | -0.576975000 |
| 1  | -2.888991000 | 3.975870000  | 0.421327000  |
| 1  | -1.351599000 | 3.146338000  | 0.154313000  |
| 6  | 4.141857000  | 1.404690000  | 1.279436000  |
| 1  | 3.974655000  | 2.187984000  | 2.023075000  |
| 1  | 3.828062000  | 0.449836000  | 1.713968000  |
| 1  | 5.217670000  | 1.346677000  | 1.089868000  |
| 6  | 3.623563000  | 0.601504000  | -1.058272000 |
| 1  | 3.031415000  | 0.769940000  | -1.961507000 |
| 1  | 4.677828000  | 0.583948000  | -1.354423000 |
| 1  | 3.375915000  | -0.388888000 | -0.667386000 |
| 6  | 0.004540000  | -3.146327000 | 3.065170000  |
| 1  | -0.451787000 | -4.033921000 | 3.512463000  |
| 1  | 0.926687000  | -2.937079000 | 3.613412000  |
| 1  | -0.692167000 | -2.316077000 | 3.233993000  |
| 6  | -1.032874000 | -3.596679000 | 0.804495000  |
| 1  | -1.742144000 | -2.778695000 | 0.959219000  |
| 1  | -0.853348000 | -3.691041000 | -0.269620000 |
| 1  | -1.515835000 | -4.520246000 | 1.140431000  |
| 5  | -0.352579000 | -0.179551000 | -1.253156000 |
| 7  | 1.941771000  | 0.991978000  | 4.412208000  |
| 7  | 1.363151000  | 0.784095000  | 3.240963000  |
| 1  | 1.836867000  | 1.930324000  | 4.790439000  |
| 1  | 2.894399000  | 0.643683000  | 4.495430000  |

[6f''<sub>SB</sub>]<sub>alt</sub> (TE = -3322.393810)

|   |             |              |             |
|---|-------------|--------------|-------------|
| 6 | 0.448473000 | -1.571308000 | 1.327472000 |
|---|-------------|--------------|-------------|

|    |              |              |              |
|----|--------------|--------------|--------------|
| 6  | 0.003729000  | -2.250029000 | 2.476138000  |
| 1  | -0.784569000 | -1.795605000 | 3.077685000  |
| 6  | 0.534450000  | -3.471647000 | 2.877179000  |
| 1  | 0.160309000  | -3.958071000 | 3.776317000  |
| 6  | 1.540094000  | -4.073693000 | 2.126681000  |
| 1  | 1.957773000  | -5.032288000 | 2.426527000  |
| 6  | 1.981620000  | -3.454802000 | 0.962767000  |
| 1  | 2.728673000  | -3.938679000 | 0.335674000  |
| 6  | 1.443065000  | -2.226951000 | 0.576279000  |
| 6  | 0.920738000  | 1.050363000  | 1.485602000  |
| 6  | 1.444326000  | 0.989796000  | 2.790584000  |
| 1  | 1.213957000  | 0.117564000  | 3.404078000  |
| 6  | 2.248480000  | 1.989782000  | 3.324469000  |
| 1  | 2.627836000  | 1.897473000  | 4.340559000  |
| 6  | 2.579718000  | 3.103034000  | 2.556181000  |
| 1  | 3.216134000  | 3.886934000  | 2.960638000  |
| 6  | 2.119199000  | 3.184119000  | 1.248757000  |
| 1  | 2.411509000  | 4.018883000  | 0.613867000  |
| 6  | 1.304725000  | 2.173110000  | 0.734282000  |
| 6  | -1.625449000 | 0.207640000  | 1.335376000  |
| 6  | -1.951241000 | 0.618862000  | 2.642287000  |
| 1  | -1.145257000 | 0.727445000  | 3.368133000  |
| 6  | -3.248515000 | 0.913067000  | 3.044482000  |
| 1  | -3.440689000 | 1.229388000  | 4.068161000  |
| 6  | -4.295824000 | 0.823456000  | 2.133117000  |
| 1  | -5.313361000 | 1.070292000  | 2.427419000  |
| 6  | -4.020438000 | 0.442636000  | 0.826957000  |
| 1  | -4.815899000 | 0.412221000  | 0.085437000  |
| 6  | -2.712351000 | 0.128491000  | 0.444358000  |
| 16 | -2.451911000 | -0.207430000 | -1.306418000 |
| 16 | 1.889086000  | -1.577796000 | -1.037612000 |
| 16 | 0.892905000  | 2.232999000  | -1.009916000 |
| 23 | 0.021817000  | -0.022140000 | -1.540627000 |
| 6  | 3.687875000  | -1.097384000 | -0.860020000 |
| 1  | 4.210261000  | -2.058675000 | -0.772475000 |
| 6  | -0.371862000 | 3.605633000  | -1.116552000 |
| 1  | 0.206165000  | 4.514980000  | -0.909429000 |
| 6  | -2.902054000 | -2.022092000 | -1.474237000 |
| 1  | -2.691130000 | -2.181723000 | -2.540135000 |
| 6  | -4.376785000 | -2.233288000 | -1.202612000 |
| 1  | -4.656706000 | -3.265388000 | -1.439299000 |
| 1  | -4.611774000 | -2.071738000 | -0.146065000 |
| 1  | -5.009623000 | -1.568898000 | -1.796761000 |
| 6  | -2.019399000 | -2.912534000 | -0.629822000 |
| 1  | -2.107101000 | -2.667777000 | 0.433889000  |
| 1  | -2.315385000 | -3.960397000 | -0.752019000 |

|   |              |              |              |
|---|--------------|--------------|--------------|
| 1 | -0.964011000 | -2.827634000 | -0.903005000 |
| 6 | 4.070250000  | -0.416577000 | -2.158068000 |
| 1 | 3.863679000  | -1.039209000 | -3.031167000 |
| 1 | 3.512291000  | 0.516910000  | -2.289433000 |
| 1 | 5.137294000  | -0.171012000 | -2.151686000 |
| 6 | 3.956548000  | -0.246418000 | 0.358707000  |
| 1 | 3.587964000  | -0.706984000 | 1.279449000  |
| 1 | 5.036120000  | -0.093479000 | 0.472124000  |
| 1 | 3.490651000  | 0.738262000  | 0.268675000  |
| 6 | -0.866877000 | 3.619007000  | -2.548847000 |
| 1 | -1.570057000 | 4.444303000  | -2.698523000 |
| 1 | -0.053800000 | 3.735406000  | -3.270458000 |
| 1 | -1.395499000 | 2.688024000  | -2.787237000 |
| 6 | -1.488794000 | 3.454131000  | -0.110544000 |
| 1 | -2.109232000 | 2.582479000  | -0.334126000 |
| 1 | -1.119303000 | 3.346279000  | 0.912962000  |
| 1 | -2.137037000 | 4.337145000  | -0.139740000 |
| 5 | -0.086587000 | -0.103408000 | 1.001844000  |
| 7 | 1.051084000  | -0.784216000 | -4.216988000 |
| 7 | -0.023033000 | -0.531563000 | -3.502314000 |
| 1 | 0.766295000  | -1.083368000 | -5.162988000 |
| 1 | -0.905522000 | -0.641398000 | -4.021888000 |

$[6f'_{SB}]_{dis}$  (TE = -3322.418409)

|   |              |              |             |
|---|--------------|--------------|-------------|
| 6 | -1.407438000 | -0.404570000 | 1.505664000 |
| 6 | -2.107240000 | 0.141004000  | 2.598130000 |
| 1 | -1.740363000 | 1.067790000  | 3.041527000 |
| 6 | -3.247204000 | -0.451817000 | 3.129350000 |
| 1 | -3.753459000 | 0.006323000  | 3.977046000 |
| 6 | -3.748155000 | -1.623680000 | 2.569165000 |
| 1 | -4.645307000 | -2.090421000 | 2.969607000 |
| 6 | -3.108778000 | -2.175816000 | 1.466109000 |
| 1 | -3.512355000 | -3.064777000 | 0.984383000 |
| 6 | -1.958788000 | -1.572792000 | 0.951357000 |
| 6 | 1.282700000  | -0.138182000 | 1.746228000 |
| 6 | 1.305429000  | -0.312482000 | 3.141481000 |
| 1 | 0.369391000  | -0.222631000 | 3.694060000 |
| 6 | 2.473976000  | -0.590720000 | 3.841897000 |
| 1 | 2.442994000  | -0.715395000 | 4.922812000 |
| 6 | 3.681739000  | -0.716569000 | 3.160965000 |
| 1 | 4.600256000  | -0.942367000 | 3.698058000 |
| 6 | 3.696882000  | -0.588684000 | 1.777522000 |
| 1 | 4.622123000  | -0.737632000 | 1.223284000 |
| 6 | 2.515397000  | -0.303415000 | 1.091145000 |
| 6 | -0.201675000 | 1.894825000  | 0.829910000 |
| 6 | 0.246902000  | 2.775108000  | 1.829915000 |

|    |              |              |              |
|----|--------------|--------------|--------------|
| 1  | 0.736526000  | 2.358609000  | 2.711094000  |
| 6  | 0.106503000  | 4.155688000  | 1.728090000  |
| 1  | 0.475998000  | 4.798742000  | 2.525020000  |
| 6  | -0.492415000 | 4.715949000  | 0.604265000  |
| 1  | -0.593814000 | 5.794686000  | 0.508911000  |
| 6  | -0.945582000 | 3.880430000  | -0.411387000 |
| 1  | -1.394274000 | 4.297455000  | -1.310879000 |
| 6  | -0.804211000 | 2.498051000  | -0.288657000 |
| 16 | -1.269686000 | 1.474967000  | -1.689074000 |
| 16 | -1.281402000 | -2.229001000 | -0.574684000 |
| 16 | 2.552365000  | -0.356270000 | -0.703070000 |
| 23 | 0.237723000  | -0.503204000 | -1.495801000 |
| 6  | -0.351212000 | -3.752130000 | -0.008111000 |
| 1  | -1.147119000 | -4.434748000 | 0.315905000  |
| 6  | 3.490241000  | 1.195972000  | -1.173649000 |
| 1  | 4.492930000  | 1.036716000  | -0.756867000 |
| 6  | -3.053019000 | 1.024031000  | -1.313798000 |
| 1  | -3.018888000 | 0.447357000  | -0.384041000 |
| 6  | -3.526220000 | 0.151128000  | -2.457888000 |
| 1  | -4.534985000 | -0.220790000 | -2.251441000 |
| 1  | -3.566633000 | 0.711645000  | -3.397712000 |
| 1  | -2.878564000 | -0.716537000 | -2.612884000 |
| 6  | -3.894011000 | 2.265880000  | -1.125086000 |
| 1  | -3.891164000 | 2.894752000  | -2.021915000 |
| 1  | -4.932915000 | 1.983553000  | -0.922189000 |
| 1  | -3.550501000 | 2.872903000  | -0.283694000 |
| 6  | 0.354196000  | -4.310123000 | -1.227278000 |
| 1  | -0.327246000 | -4.482829000 | -2.064821000 |
| 1  | 1.132593000  | -3.619451000 | -1.570060000 |
| 1  | 0.834711000  | -5.261863000 | -0.978978000 |
| 6  | 0.596027000  | -3.469274000 | 1.134119000  |
| 1  | 0.099875000  | -2.991233000 | 1.983205000  |
| 1  | 1.037117000  | -4.406985000 | 1.490738000  |
| 1  | 1.415534000  | -2.817496000 | 0.817147000  |
| 6  | 3.547287000  | 1.213033000  | -2.687414000 |
| 1  | 4.132332000  | 2.070569000  | -3.034486000 |
| 1  | 4.002468000  | 0.306643000  | -3.097195000 |
| 1  | 2.539650000  | 1.301810000  | -3.110433000 |
| 6  | 2.867807000  | 2.444202000  | -0.597537000 |
| 1  | 1.864930000  | 2.606829000  | -1.005273000 |
| 1  | 2.780104000  | 2.400322000  | 0.491072000  |
| 1  | 3.477080000  | 3.319846000  | -0.849676000 |
| 5  | -0.065157000 | 0.317407000  | 1.024139000  |
| 7  | 0.912821000  | -1.745739000 | -4.209243000 |
| 7  | 0.591328000  | -1.126179000 | -3.042755000 |
| 1  | 1.057468000  | -1.070291000 | -4.960205000 |

1 1.767354000 -2.296445000 -4.112198000

[7f'<sub>SB</sub>]<sub>alt</sub> (TE = -3322.850322)

6 -1.395247000 0.158804000 1.701261000  
6 -1.589286000 0.760501000 2.958125000  
1 -0.737435000 1.228592000 3.452078000  
6 -2.825444000 0.774218000 3.592940000  
1 -2.928408000 1.246256000 4.567312000  
6 -3.933541000 0.196287000 2.979311000  
1 -4.905368000 0.209950000 3.465720000  
6 -3.796539000 -0.365836000 1.717995000  
1 -4.662517000 -0.772877000 1.199954000  
6 -2.541767000 -0.383737000 1.103995000  
6 1.018081000 -1.086379000 1.639473000  
6 0.911126000 -1.568068000 2.955660000  
1 0.099639000 -1.203359000 3.584239000  
6 1.821781000 -2.473949000 3.488599000  
1 1.711293000 -2.810053000 4.517040000  
6 2.871298000 -2.955317000 2.710859000  
1 3.581347000 -3.668953000 3.120509000  
6 2.982683000 -2.548630000 1.386599000  
1 3.761409000 -2.961363000 0.748249000  
6 2.068776000 -1.628070000 0.877783000  
6 0.849700000 1.490343000 0.976460000  
6 1.718452000 1.887012000 2.009101000  
1 1.883032000 1.207045000 2.845262000  
6 2.383249000 3.107873000 1.995377000  
1 3.041781000 3.374389000 2.819100000  
6 2.223082000 3.979965000 0.922855000  
1 2.752507000 4.928844000 0.896326000  
6 1.386205000 3.621572000 -0.126793000  
1 1.260034000 4.280681000 -0.982796000  
6 0.705417000 2.403804000 -0.081336000  
16 -0.307662000 1.979919000 -1.500097000  
16 -2.483176000 -0.947370000 -0.601397000  
16 2.075464000 -1.281740000 -0.878239000  
23 -0.181209000 -0.474632000 -1.391499000  
6 -2.487491000 -2.811798000 -0.496767000  
1 -3.308507000 -3.033495000 0.194689000  
6 3.658845000 -0.375944000 -1.306261000  
1 4.408331000 -1.175769000 -1.304341000  
6 -2.031628000 2.550187000 -1.029975000  
1 -2.330354000 1.918893000 -0.186209000  
6 -2.908530000 2.291929000 -2.238452000  
1 -3.948315000 2.531607000 -1.997846000  
1 -2.615560000 2.919477000 -3.085620000

|   |              |              |              |
|---|--------------|--------------|--------------|
| 1 | -2.883727000 | 1.247244000  | -2.562030000 |
| 6 | -2.002190000 | 4.000834000  | -0.607255000 |
| 1 | -1.635999000 | 4.649765000  | -1.408986000 |
| 1 | -3.017078000 | 4.325381000  | -0.357465000 |
| 1 | -1.380708000 | 4.163365000  | 0.276118000  |
| 6 | -2.800651000 | -3.332981000 | -1.884263000 |
| 1 | -3.760581000 | -2.971080000 | -2.257754000 |
| 1 | -2.030186000 | -3.042353000 | -2.607214000 |
| 1 | -2.836871000 | -4.426079000 | -1.870172000 |
| 6 | -1.177043000 | -3.330046000 | 0.052132000  |
| 1 | -0.925475000 | -2.898405000 | 1.023736000  |
| 1 | -1.213722000 | -4.418303000 | 0.167096000  |
| 1 | -0.343549000 | -3.123453000 | -0.638672000 |
| 6 | 3.473464000  | 0.162885000  | -2.709248000 |
| 1 | 4.407733000  | 0.614670000  | -3.054686000 |
| 1 | 3.198617000  | -0.615998000 | -3.425705000 |
| 1 | 2.700889000  | 0.938949000  | -2.735359000 |
| 6 | 4.011520000  | 0.684018000  | -0.292459000 |
| 1 | 3.316315000  | 1.525683000  | -0.329908000 |
| 1 | 4.026701000  | 0.298337000  | 0.729904000  |
| 1 | 5.012862000  | 1.067939000  | -0.513840000 |
| 5 | 0.088086000  | 0.097823000  | 1.124233000  |
| 7 | 0.035753000  | -1.866049000 | -4.085270000 |
| 7 | -0.155014000 | -0.729965000 | -3.296690000 |
| 1 | 0.650838000  | -1.670919000 | -4.874498000 |
| 1 | 0.476706000  | -2.591848000 | -3.525193000 |
| 1 | -0.383418000 | 0.036966000  | -3.930553000 |

[7F'<sub>SB</sub>]<sub>dis</sub> (TE = -3322.818914)

|   |              |              |             |
|---|--------------|--------------|-------------|
| 6 | -0.408187000 | 1.673604000  | 1.311348000 |
| 6 | 0.056422000  | 2.393220000  | 2.425862000 |
| 1 | 0.836588000  | 1.954774000  | 3.048358000 |
| 6 | -0.455233000 | 3.641161000  | 2.763611000 |
| 1 | -0.074390000 | 4.163670000  | 3.638222000 |
| 6 | -1.444594000 | 4.227479000  | 1.979280000 |
| 1 | -1.840340000 | 5.208152000  | 2.231009000 |
| 6 | -1.897608000 | 3.566464000  | 0.844426000 |
| 1 | -2.629080000 | 4.036925000  | 0.190449000 |
| 6 | -1.384994000 | 2.307999000  | 0.531898000 |
| 6 | -0.891528000 | -0.940907000 | 1.658766000 |
| 6 | -1.429117000 | -0.769712000 | 2.946873000 |
| 1 | -1.253923000 | 0.170730000  | 3.469642000 |
| 6 | -2.170113000 | -1.762274000 | 3.577617000 |
| 1 | -2.561958000 | -1.592384000 | 4.577939000 |
| 6 | -2.421871000 | -2.966524000 | 2.926667000 |
| 1 | -3.011514000 | -3.742652000 | 3.407997000 |

|    |              |              |              |
|----|--------------|--------------|--------------|
| 6  | -1.944271000 | -3.157172000 | 1.636260000  |
| 1  | -2.178242000 | -4.070758000 | 1.093244000  |
| 6  | -1.186697000 | -2.156754000 | 1.026756000  |
| 6  | 1.634673000  | -0.105579000 | 1.311463000  |
| 6  | 2.052095000  | -0.507360000 | 2.593003000  |
| 1  | 1.298989000  | -0.671898000 | 3.363675000  |
| 6  | 3.390117000  | -0.711185000 | 2.908299000  |
| 1  | 3.668548000  | -1.018318000 | 3.913885000  |
| 6  | 4.368800000  | -0.550118000 | 1.932602000  |
| 1  | 5.415221000  | -0.734512000 | 2.162005000  |
| 6  | 3.993822000  | -0.188062000 | 0.645444000  |
| 1  | 4.738713000  | -0.119113000 | -0.143427000 |
| 6  | 2.648180000  | 0.049960000  | 0.354898000  |
| 16 | 2.202595000  | 0.336982000  | -1.357387000 |
| 16 | -1.829067000 | 1.572274000  | -1.036672000 |
| 16 | -0.741043000 | -2.361222000 | -0.692663000 |
| 23 | -0.195146000 | -0.164817000 | -1.686156000 |
| 6  | -3.613226000 | 1.047421000  | -0.838330000 |
| 1  | -4.144102000 | 2.003418000  | -0.753627000 |
| 6  | 0.584620000  | -3.683940000 | -0.681898000 |
| 1  | 0.029215000  | -4.586643000 | -0.399995000 |
| 6  | 2.628840000  | 2.132685000  | -1.685560000 |
| 1  | 2.339023000  | 2.206901000  | -2.741814000 |
| 6  | 4.120039000  | 2.352863000  | -1.542783000 |
| 1  | 4.376301000  | 3.359862000  | -1.886601000 |
| 1  | 4.435075000  | 2.282904000  | -0.497609000 |
| 1  | 4.707681000  | 1.640692000  | -2.127007000 |
| 6  | 1.812710000  | 3.088515000  | -0.847558000 |
| 1  | 1.977477000  | 2.926299000  | 0.222377000  |
| 1  | 2.104797000  | 4.120338000  | -1.070094000 |
| 1  | 0.741706000  | 2.998169000  | -1.040035000 |
| 6  | -4.004752000 | 0.352049000  | -2.126088000 |
| 1  | -3.841464000 | 0.984968000  | -3.003719000 |
| 1  | -3.436747000 | -0.575795000 | -2.258596000 |
| 1  | -5.066167000 | 0.088924000  | -2.100622000 |
| 6  | -3.852501000 | 0.203289000  | 0.389471000  |
| 1  | -3.482298000 | 0.679926000  | 1.300595000  |
| 1  | -4.927822000 | 0.038002000  | 0.515829000  |
| 1  | -3.374609000 | -0.776140000 | 0.303197000  |
| 6  | 1.085582000  | -3.806522000 | -2.106008000 |
| 1  | 1.807433000  | -4.625343000 | -2.176705000 |
| 1  | 0.279901000  | -4.010773000 | -2.816422000 |
| 1  | 1.596468000  | -2.890728000 | -2.424146000 |
| 6  | 1.686330000  | -3.412688000 | 0.313357000  |
| 1  | 2.294557000  | -2.555482000 | 0.014097000  |
| 1  | 1.305016000  | -3.222107000 | 1.319879000  |



|   |              |              |              |
|---|--------------|--------------|--------------|
| 1 | 2.348258000  | -4.283455000 | 0.370000000  |
| 5 | 0.086353000  | 0.181780000  | 1.101664000  |
| 7 | -0.865281000 | -0.162473000 | -4.757960000 |
| 7 | -0.473132000 | -0.230642000 | -3.405565000 |
| 1 | -0.066439000 | -0.009849000 | -5.385535000 |
| 1 | -1.324719000 | -1.025657000 | -5.074048000 |
| 1 | -1.526656000 | 0.604632000  | -4.934935000 |

**[8f''<sub>SB</sub>]<sub>alt</sub>** (TE = -3322.999688)

|    |              |              |              |
|----|--------------|--------------|--------------|
| 6  | -0.517402000 | 1.347502000  | 1.518235000  |
| 6  | -0.083285000 | 1.909095000  | 2.732507000  |
| 1  | 0.739045000  | 1.428780000  | 3.263864000  |
| 6  | -0.666395000 | 3.044673000  | 3.284305000  |
| 1  | -0.298585000 | 3.439737000  | 4.229619000  |
| 6  | -1.716665000 | 3.678575000  | 2.626758000  |
| 1  | -2.175105000 | 4.571935000  | 3.044900000  |
| 6  | -2.151213000 | 3.180284000  | 1.403924000  |
| 1  | -2.933593000 | 3.696261000  | 0.849791000  |
| 6  | -1.560485000 | 2.035546000  | 0.867926000  |
| 6  | -0.873613000 | -1.289083000 | 1.316558000  |
| 6  | -1.413060000 | -1.434657000 | 2.608254000  |
| 1  | -1.233808000 | -0.645156000 | 3.339720000  |
| 6  | -2.169681000 | -2.538018000 | 2.984917000  |
| 1  | -2.564064000 | -2.606780000 | 3.997153000  |
| 6  | -2.433664000 | -3.550115000 | 2.065154000  |
| 1  | -3.031932000 | -4.413560000 | 2.347373000  |
| 6  | -1.955577000 | -3.427474000 | 0.767098000  |
| 1  | -2.196212000 | -4.181167000 | 0.019080000  |
| 6  | -1.189730000 | -2.315134000 | 0.412277000  |
| 6  | 1.630312000  | -0.331315000 | 1.321107000  |
| 6  | 1.958694000  | -0.879140000 | 2.576445000  |
| 1  | 1.150993000  | -1.096534000 | 3.275506000  |
| 6  | 3.261718000  | -1.173400000 | 2.959012000  |
| 1  | 3.455913000  | -1.597946000 | 3.942363000  |
| 6  | 4.313276000  | -0.944186000 | 2.077256000  |
| 1  | 5.336263000  | -1.188046000 | 2.354672000  |
| 6  | 4.036167000  | -0.426093000 | 0.819727000  |
| 1  | 4.836652000  | -0.284051000 | 0.096761000  |
| 6  | 2.721180000  | -0.114368000 | 0.458751000  |
| 16 | 2.464752000  | 0.411767000  | -1.244299000 |
| 16 | -2.011464000 | 1.555422000  | -0.802921000 |
| 16 | -0.751214000 | -2.100744000 | -1.312926000 |
| 23 | -0.001338000 | 0.252687000  | -1.539919000 |
| 6  | -3.783458000 | 0.983979000  | -0.659016000 |
| 1  | -4.336097000 | 1.896196000  | -0.400706000 |
| 6  | 0.557478000  | -3.403831000 | -1.600343000 |

|   |              |              |              |
|---|--------------|--------------|--------------|
| 1 | 0.006392000  | -4.350259000 | -1.532963000 |
| 6 | 2.848471000  | 2.245393000  | -1.193069000 |
| 1 | 2.625174000  | 2.524803000  | -2.230383000 |
| 6 | 4.315165000  | 2.475711000  | -0.894758000 |
| 1 | 4.555260000  | 3.538836000  | -1.002956000 |
| 1 | 4.559540000  | 2.194766000  | 0.134426000  |
| 1 | 4.970378000  | 1.913778000  | -1.565363000 |
| 6 | 1.935622000  | 2.992040000  | -0.246914000 |
| 1 | 2.034062000  | 2.621668000  | 0.778928000  |
| 1 | 2.193460000  | 4.056951000  | -0.238580000 |
| 1 | 0.884862000  | 2.902685000  | -0.535514000 |
| 6 | -4.187568000 | 0.513071000  | -2.041517000 |
| 1 | -4.066807000 | 1.294664000  | -2.797318000 |
| 1 | -3.591071000 | -0.353028000 | -2.351126000 |
| 1 | -5.237949000 | 0.205688000  | -2.045633000 |
| 6 | -3.984724000 | -0.065439000 | 0.407936000  |
| 1 | -3.603764000 | 0.256214000  | 1.380866000  |
| 1 | -5.053907000 | -0.278181000 | 0.522510000  |
| 1 | -3.484888000 | -1.001907000 | 0.147552000  |
| 6 | 1.067511000  | -3.197960000 | -3.012344000 |
| 1 | 1.801048000  | -3.970251000 | -3.263991000 |
| 1 | 0.267348000  | -3.241140000 | -3.756026000 |
| 1 | 1.564978000  | -2.226240000 | -3.111915000 |
| 6 | 1.657916000  | -3.363592000 | -0.565964000 |
| 1 | 2.255143000  | -2.453071000 | -0.657157000 |
| 1 | 1.274697000  | -3.409802000 | 0.457143000  |
| 1 | 2.331684000  | -4.215854000 | -0.708520000 |
| 5 | 0.083544000  | -0.038136000 | 1.007255000  |
| 7 | -0.984299000 | 1.742542000  | -4.011279000 |
| 7 | 0.101340000  | 1.234271000  | -3.207064000 |
| 1 | -1.447601000 | 2.477331000  | -3.472916000 |
| 1 | -1.678166000 | 0.999149000  | -4.079396000 |
| 1 | 0.949306000  | 1.459233000  | -3.724493000 |

$[8f'_{SB}]_{dis}$  (TE = -3266.488000)

|   |              |              |              |
|---|--------------|--------------|--------------|
| 6 | -0.766815000 | 1.968619000  | 0.519001000  |
| 6 | -0.479397000 | 3.121869000  | 1.272516000  |
| 1 | 0.390339000  | 3.115430000  | 1.929266000  |
| 6 | -1.284420000 | 4.254926000  | 1.231051000  |
| 1 | -1.034496000 | 5.120142000  | 1.842270000  |
| 6 | -2.411718000 | 4.284397000  | 0.413707000  |
| 1 | -3.045459000 | 5.167385000  | 0.375653000  |
| 6 | -2.692767000 | 3.191220000  | -0.399650000 |
| 1 | -3.526495000 | 3.229763000  | -1.098755000 |
| 6 | -1.876989000 | 2.063419000  | -0.347670000 |
| 6 | -0.926964000 | -0.569373000 | 1.306843000  |

|    |              |              |              |
|----|--------------|--------------|--------------|
| 6  | -1.626933000 | -0.185771000 | 2.471223000  |
| 1  | -1.555173000 | 0.852143000  | 2.796843000  |
| 6  | -2.405197000 | -1.058532000 | 3.219563000  |
| 1  | -2.909557000 | -0.701694000 | 4.115491000  |
| 6  | -2.551930000 | -2.380507000 | 2.811860000  |
| 1  | -3.168983000 | -3.074811000 | 3.377337000  |
| 6  | -1.920770000 | -2.796154000 | 1.648831000  |
| 1  | -2.058854000 | -3.813245000 | 1.286706000  |
| 6  | -1.116126000 | -1.913759000 | 0.918809000  |
| 6  | 1.487067000  | 0.623192000  | 1.318988000  |
| 6  | 1.658978000  | 0.902334000  | 2.687540000  |
| 1  | 0.777956000  | 1.102999000  | 3.297459000  |
| 6  | 2.907779000  | 0.917686000  | 3.297129000  |
| 1  | 2.989968000  | 1.139960000  | 4.359368000  |
| 6  | 4.050088000  | 0.631847000  | 2.554417000  |
| 1  | 5.030490000  | 0.626939000  | 3.025095000  |
| 6  | 3.922884000  | 0.326557000  | 1.206594000  |
| 1  | 4.797847000  | 0.060443000  | 0.617089000  |
| 6  | 2.660910000  | 0.336511000  | 0.604753000  |
| 16 | 2.551651000  | -0.183819000 | -1.110169000 |
| 16 | -2.071487000 | 0.783914000  | -1.582704000 |
| 16 | -0.445715000 | -2.580636000 | -0.609404000 |
| 23 | 0.140861000  | -0.424702000 | -1.640632000 |
| 6  | -3.787308000 | 0.077706000  | -1.347121000 |
| 1  | -4.438496000 | 0.825884000  | -1.815548000 |
| 6  | 0.940996000  | -3.702672000 | -0.027061000 |
| 1  | 0.402795000  | -4.570854000 | 0.373489000  |
| 6  | 2.937172000  | 1.383825000  | -2.059452000 |
| 1  | 2.801583000  | 1.020582000  | -3.084684000 |
| 6  | 4.369696000  | 1.808046000  | -1.817680000 |
| 1  | 4.623595000  | 2.645406000  | -2.476050000 |
| 1  | 4.517024000  | 2.152483000  | -0.789091000 |
| 1  | 5.081468000  | 1.001855000  | -2.012879000 |
| 6  | 1.940935000  | 2.483223000  | -1.761212000 |
| 1  | 1.918860000  | 2.732538000  | -0.694828000 |
| 1  | 2.216592000  | 3.392779000  | -2.306206000 |
| 1  | 0.925973000  | 2.213343000  | -2.069169000 |
| 6  | -3.828524000 | -1.207239000 | -2.149610000 |
| 1  | -3.514369000 | -1.063600000 | -3.186771000 |
| 1  | -3.177864000 | -1.968607000 | -1.706523000 |
| 1  | -4.847298000 | -1.607411000 | -2.160290000 |
| 6  | -4.176729000 | -0.114293000 | 0.099659000  |
| 1  | -4.043625000 | 0.793916000  | 0.693327000  |
| 1  | -5.235317000 | -0.393171000 | 0.154626000  |
| 1  | -3.599281000 | -0.912865000 | 0.570034000  |
| 6  | 1.718961000  | -4.098352000 | -1.264856000 |

|   |             |              |              |
|---|-------------|--------------|--------------|
| 1 | 2.493028000 | -4.826185000 | -1.002112000 |
| 1 | 1.083193000 | -4.549935000 | -2.030803000 |
| 1 | 2.216230000 | -3.231060000 | -1.711218000 |
| 6 | 1.803797000 | -3.089001000 | 1.049495000  |
| 1 | 2.409594000 | -2.268025000 | 0.661204000  |
| 1 | 1.221901000 | -2.709350000 | 1.893652000  |
| 1 | 2.493916000 | -3.846232000 | 1.437733000  |
| 5 | 0.011035000 | 0.607541000  | 0.710057000  |
| 7 | 0.376671000 | -0.399456000 | -3.198147000 |

$[9f'_{SB}]_{alt}$  (TE = -3323.442488)

|    |              |              |              |
|----|--------------|--------------|--------------|
| 6  | 0.232717000  | 2.089619000  | -0.410606000 |
| 6  | -0.376993000 | 3.215365000  | -0.995645000 |
| 1  | -1.199924000 | 3.060797000  | -1.692720000 |
| 6  | 0.045830000  | 4.513555000  | -0.734615000 |
| 1  | -0.445282000 | 5.351555000  | -1.224349000 |
| 6  | 1.091346000  | 4.743268000  | 0.155025000  |
| 1  | 1.423576000  | 5.755686000  | 0.370166000  |
| 6  | 1.687062000  | 3.665038000  | 0.797276000  |
| 1  | 2.469466000  | 3.830482000  | 1.535326000  |
| 6  | 1.266142000  | 2.366183000  | 0.510157000  |
| 6  | 0.898810000  | -0.143132000 | -1.736598000 |
| 6  | 1.397492000  | 0.504156000  | -2.882031000 |
| 1  | 1.062657000  | 1.519462000  | -3.096501000 |
| 6  | 2.312246000  | -0.094412000 | -3.739430000 |
| 1  | 2.665654000  | 0.443341000  | -4.616396000 |
| 6  | 2.792359000  | -1.372917000 | -3.467144000 |
| 1  | 3.519562000  | -1.843172000 | -4.124064000 |
| 6  | 2.355218000  | -2.035043000 | -2.327889000 |
| 1  | 2.749865000  | -3.017758000 | -2.077282000 |
| 6  | 1.416770000  | -1.424362000 | -1.493038000 |
| 6  | -1.722610000 | 0.412503000  | -1.317667000 |
| 6  | -2.051592000 | 0.727891000  | -2.649488000 |
| 1  | -1.258232000 | 1.062716000  | -3.317295000 |
| 6  | -3.341591000 | 0.621439000  | -3.153778000 |
| 1  | -3.539654000 | 0.879029000  | -4.191851000 |
| 6  | -4.374324000 | 0.169373000  | -2.338075000 |
| 1  | -5.385314000 | 0.069446000  | -2.724417000 |
| 6  | -4.092698000 | -0.184227000 | -1.026996000 |
| 1  | -4.875448000 | -0.584617000 | -0.386583000 |
| 6  | -2.792112000 | -0.049878000 | -0.530371000 |
| 16 | -2.518414000 | -0.711853000 | 1.127496000  |
| 16 | 1.929680000  | 1.030099000  | 1.508811000  |
| 16 | 0.958628000  | -2.291026000 | 0.009355000  |
| 23 | -0.055205000 | -0.467397000 | 1.315269000  |
| 6  | 3.719611000  | 0.783239000  | 0.981005000  |

|   |              |              |              |
|---|--------------|--------------|--------------|
| 1 | 4.241609000  | 1.553944000  | 1.559624000  |
| 6 | -0.178811000 | -3.653662000 | -0.580363000 |
| 1 | 0.504662000  | -4.331760000 | -1.105271000 |
| 6 | -2.936914000 | 0.691817000  | 2.294504000  |
| 1 | -2.935728000 | 0.164756000  | 3.257486000  |
| 6 | -4.311147000 | 1.255514000  | 2.015832000  |
| 1 | -4.561124000 | 2.010878000  | 2.767108000  |
| 1 | -4.350759000 | 1.743361000  | 1.037806000  |
| 1 | -5.086396000 | 0.486721000  | 2.044537000  |
| 6 | -1.855513000 | 1.753301000  | 2.273598000  |
| 1 | -1.771321000 | 2.229248000  | 1.293265000  |
| 1 | -2.068808000 | 2.540838000  | 3.004064000  |
| 1 | -0.857571000 | 1.372685000  | 2.558132000  |
| 6 | 4.133937000  | -0.590857000 | 1.461312000  |
| 1 | 3.932587000  | -0.742630000 | 2.524322000  |
| 1 | 3.616911000  | -1.375901000 | 0.898287000  |
| 1 | 5.207798000  | -0.725882000 | 1.300148000  |
| 6 | 3.946381000  | 0.998050000  | -0.495041000 |
| 1 | 3.526949000  | 1.940785000  | -0.855064000 |
| 1 | 5.024831000  | 1.027059000  | -0.684275000 |
| 1 | 3.527824000  | 0.186378000  | -1.092437000 |
| 6 | -0.727355000 | -4.330337000 | 0.658976000  |
| 1 | -1.308275000 | -5.213191000 | 0.377883000  |
| 1 | 0.063139000  | -4.661078000 | 1.339390000  |
| 1 | -1.402055000 | -3.662766000 | 1.206621000  |
| 6 | -1.250910000 | -3.159664000 | -1.521210000 |
| 1 | -1.975330000 | -2.522183000 | -1.008712000 |
| 1 | -0.841966000 | -2.595251000 | -2.363084000 |
| 1 | -1.798374000 | -4.014433000 | -1.931572000 |
| 5 | -0.201161000 | 0.623149000  | -0.863264000 |
| 7 | 1.528102000  | -1.923703000 | 3.532695000  |
| 7 | 0.179137000  | -1.442600000 | 3.342755000  |
| 1 | 1.537797000  | -2.620056000 | 4.277038000  |
| 1 | 1.783021000  | -2.412866000 | 2.677112000  |
| 1 | -0.505604000 | -2.189767000 | 3.481390000  |
| 1 | 0.015685000  | -0.783825000 | 4.102354000  |

$[9f'_{SB}]_{dis}$  (TE = -3266.933760)

|   |              |             |             |
|---|--------------|-------------|-------------|
| 6 | 0.035250000  | 1.474626000 | 1.007565000 |
| 6 | 0.981715000  | 2.004982000 | 1.924329000 |
| 1 | 1.626913000  | 1.311452000 | 2.457885000 |
| 6 | 1.075190000  | 3.352504000 | 2.221588000 |
| 1 | 1.782574000  | 3.690551000 | 2.974799000 |
| 6 | 0.273747000  | 4.273059000 | 1.548306000 |
| 1 | 0.350225000  | 5.335852000 | 1.762909000 |
| 6 | -0.612376000 | 3.824340000 | 0.584754000 |

|    |              |              |              |
|----|--------------|--------------|--------------|
| 1  | -1.214230000 | 4.531897000  | 0.020406000  |
| 6  | -0.754838000 | 2.453243000  | 0.327078000  |
| 6  | -1.410470000 | -0.901844000 | 1.204522000  |
| 6  | -2.017443000 | -1.027892000 | 2.464416000  |
| 1  | -1.607200000 | -0.480367000 | 3.312797000  |
| 6  | -3.145157000 | -1.818403000 | 2.652458000  |
| 1  | -3.592314000 | -1.896997000 | 3.640473000  |
| 6  | -3.715951000 | -2.494822000 | 1.576367000  |
| 1  | -4.605898000 | -3.102333000 | 1.718173000  |
| 6  | -3.152977000 | -2.376823000 | 0.311769000  |
| 1  | -3.602717000 | -2.878917000 | -0.542546000 |
| 6  | -2.004580000 | -1.601057000 | 0.148583000  |
| 6  | 1.256909000  | -0.881843000 | 1.429050000  |
| 6  | 1.295204000  | -1.617840000 | 2.625837000  |
| 1  | 0.390275000  | -1.699511000 | 3.224848000  |
| 6  | 2.454119000  | -2.234158000 | 3.079230000  |
| 1  | 2.446560000  | -2.776792000 | 4.021353000  |
| 6  | 3.615433000  | -2.180785000 | 2.314296000  |
| 1  | 4.518764000  | -2.686550000 | 2.645369000  |
| 6  | 3.601690000  | -1.523086000 | 1.091414000  |
| 1  | 4.474295000  | -1.562851000 | 0.446430000  |
| 6  | 2.445880000  | -0.859185000 | 0.675230000  |
| 16 | 2.351232000  | -0.281225000 | -1.017242000 |
| 16 | -1.832621000 | 2.027428000  | -1.036200000 |
| 16 | -1.304098000 | -1.408752000 | -1.488956000 |
| 23 | 0.099295000  | 0.608058000  | -1.457607000 |
| 6  | -3.629646000 | 1.863512000  | -0.448765000 |
| 1  | -3.951856000 | 2.903524000  | -0.573171000 |
| 6  | -0.469729000 | -3.048536000 | -1.830599000 |
| 1  | -1.327395000 | -3.720510000 | -1.958429000 |
| 6  | 3.586751000  | 1.101210000  | -1.284457000 |
| 1  | 3.381899000  | 1.298684000  | -2.344018000 |
| 6  | 5.009968000  | 0.611698000  | -1.117829000 |
| 1  | 5.697029000  | 1.371173000  | -1.503282000 |
| 1  | 5.264077000  | 0.461349000  | -0.065350000 |
| 1  | 5.205067000  | -0.315573000 | -1.660976000 |
| 6  | 3.294013000  | 2.330789000  | -0.457556000 |
| 1  | 3.395754000  | 2.125503000  | 0.611869000  |
| 1  | 4.014316000  | 3.117179000  | -0.706336000 |
| 1  | 2.294201000  | 2.736397000  | -0.635984000 |
| 6  | -4.332122000 | 0.979403000  | -1.454711000 |
| 1  | -4.176679000 | 1.304325000  | -2.486461000 |
| 1  | -4.004089000 | -0.060288000 | -1.367743000 |
| 1  | -5.409383000 | 1.002913000  | -1.262941000 |
| 6  | -3.813767000 | 1.433265000  | 0.981727000  |
| 1  | -3.119337000 | 1.922653000  | 1.670390000  |

|   |              |              |              |
|---|--------------|--------------|--------------|
| 1 | -4.826246000 | 1.707208000  | 1.297000000  |
| 1 | -3.717840000 | 0.354711000  | 1.096408000  |
| 6 | 0.269706000  | -2.895608000 | -3.143395000 |
| 1 | 0.682429000  | -3.862278000 | -3.445799000 |
| 1 | -0.377598000 | -2.543029000 | -3.950194000 |
| 1 | 1.105912000  | -2.195859000 | -3.046341000 |
| 6 | 0.404252000  | -3.525618000 | -0.695851000 |
| 1 | 1.307267000  | -2.918305000 | -0.599991000 |
| 1 | -0.113745000 | -3.524245000 | 0.266808000  |
| 1 | 0.722894000  | -4.553908000 | -0.895703000 |
| 5 | -0.060654000 | -0.107706000 | 1.027021000  |
| 7 | 0.497500000  | 0.827777000  | -3.064605000 |
| 1 | 0.846256000  | 0.671689000  | -4.014328000 |

[10f'<sub>SB</sub>]<sub>alt</sub> (TE = -3323.566068)

|    |              |              |              |
|----|--------------|--------------|--------------|
| 6  | -0.283363000 | 1.458274000  | 1.507937000  |
| 6  | 0.175959000  | 1.901299000  | 2.761885000  |
| 1  | 0.798650000  | 1.228722000  | 3.353889000  |
| 6  | -0.121336000 | 3.160562000  | 3.271907000  |
| 1  | 0.260612000  | 3.456573000  | 4.247522000  |
| 6  | -0.899394000 | 4.044244000  | 2.530111000  |
| 1  | -1.133146000 | 5.035144000  | 2.913606000  |
| 6  | -1.350177000 | 3.658230000  | 1.273223000  |
| 1  | -1.921656000 | 4.352230000  | 0.658767000  |
| 6  | -1.044849000 | 2.389510000  | 0.776941000  |
| 6  | -1.087918000 | -1.111340000 | 1.453421000  |
| 6  | -1.602773000 | -1.085403000 | 2.763042000  |
| 1  | -1.258055000 | -0.303150000 | 3.440599000  |
| 6  | -2.539256000 | -2.003131000 | 3.226578000  |
| 1  | -2.906773000 | -1.935215000 | 4.249130000  |
| 6  | -3.013011000 | -3.000435000 | 2.379981000  |
| 1  | -3.752382000 | -3.719354000 | 2.726416000  |
| 6  | -2.552340000 | -3.048651000 | 1.069846000  |
| 1  | -2.942496000 | -3.793637000 | 0.378206000  |
| 6  | -1.610745000 | -2.120001000 | 0.621524000  |
| 6  | 1.547604000  | -0.539016000 | 1.276022000  |
| 6  | 1.857685000  | -1.194479000 | 2.482337000  |
| 1  | 1.057718000  | -1.349884000 | 3.207283000  |
| 6  | 3.127579000  | -1.677263000 | 2.780152000  |
| 1  | 3.308613000  | -2.183630000 | 3.726805000  |
| 6  | 4.157535000  | -1.532374000 | 1.857403000  |
| 1  | 5.150657000  | -1.925102000 | 2.064799000  |
| 6  | 3.895828000  | -0.901497000 | 0.646898000  |
| 1  | 4.676601000  | -0.818434000 | -0.106027000 |
| 6  | 2.619655000  | -0.402699000 | 0.369308000  |
| 16 | 2.342059000  | 0.252435000  | -1.291566000 |

|    |              |              |              |
|----|--------------|--------------|--------------|
| 16 | -1.505527000 | 2.032200000  | -0.927184000 |
| 16 | -1.196172000 | -2.152787000 | -1.130777000 |
| 23 | -0.116323000 | 0.043892000  | -1.414745000 |
| 6  | -3.367877000 | 1.782760000  | -0.802163000 |
| 1  | -3.753382000 | 2.777141000  | -0.543504000 |
| 6  | -0.078995000 | -3.669314000 | -1.237450000 |
| 1  | -0.749431000 | -4.510131000 | -1.019427000 |
| 6  | 3.060892000  | 1.998789000  | -1.185722000 |
| 1  | 2.868191000  | 2.343594000  | -2.211388000 |
| 6  | 4.552221000  | 1.960274000  | -0.929971000 |
| 1  | 4.980127000  | 2.963601000  | -1.036378000 |
| 1  | 4.770410000  | 1.626259000  | 0.088935000  |
| 1  | 5.077036000  | 1.297108000  | -1.623303000 |
| 6  | 2.319653000  | 2.866847000  | -0.198272000 |
| 1  | 2.379552000  | 2.457731000  | 0.815984000  |
| 1  | 2.752824000  | 3.873607000  | -0.173069000 |
| 1  | 1.261895000  | 2.961420000  | -0.452892000 |
| 6  | -3.832637000 | 1.382158000  | -2.186269000 |
| 1  | -3.547704000 | 2.109852000  | -2.951053000 |
| 1  | -3.400029000 | 0.414335000  | -2.470115000 |
| 1  | -4.922078000 | 1.274864000  | -2.207232000 |
| 6  | -3.749057000 | 0.774438000  | 0.254634000  |
| 1  | -3.341864000 | 1.024832000  | 1.238129000  |
| 1  | -4.840139000 | 0.722281000  | 0.348185000  |
| 1  | -3.390483000 | -0.225199000 | -0.007398000 |
| 6  | 0.402498000  | -3.739446000 | -2.670872000 |
| 1  | 1.007399000  | -4.637530000 | -2.831788000 |
| 1  | -0.423426000 | -3.760545000 | -3.389070000 |
| 1  | 1.036043000  | -2.873168000 | -2.902613000 |
| 6  | 1.058261000  | -3.622631000 | -0.246537000 |
| 1  | 1.734965000  | -2.791038000 | -0.465188000 |
| 1  | 0.709281000  | -3.503029000 | 0.782677000  |
| 1  | 1.641583000  | -4.549552000 | -0.296148000 |
| 5  | 0.039409000  | -0.040964000 | 1.045473000  |
| 7  | -0.187286000 | 0.111329000  | -3.668252000 |
| 1  | 0.701679000  | -0.244667000 | -4.021163000 |
| 1  | -0.904259000 | -0.504780000 | -4.044912000 |
| 7  | -0.466286000 | 1.427906000  | -4.197106000 |
| 1  | -0.065223000 | 2.083819000  | -3.527873000 |
| 1  | 0.036469000  | 1.557804000  | -5.074048000 |

**[10f''<sub>SB</sub>]<sub>dis</sub> (TE = -3267.093000)**

|   |              |             |             |
|---|--------------|-------------|-------------|
| 6 | -0.362894000 | 1.710071000 | 1.099358000 |
| 6 | 0.050991000  | 2.379653000 | 2.265124000 |
| 1 | 0.691392000  | 1.850567000 | 2.971902000 |
| 6 | -0.323229000 | 3.688418000 | 2.548506000 |



|    |              |              |              |
|----|--------------|--------------|--------------|
| 1  | 0.020222000  | 4.165227000  | 3.464760000  |
| 6  | -1.128167000 | 4.392499000  | 1.657138000  |
| 1  | -1.417796000 | 5.420232000  | 1.864145000  |
| 6  | -1.529159000 | 3.780174000  | 0.476137000  |
| 1  | -2.114428000 | 4.332231000  | -0.257269000 |
| 6  | -1.150738000 | 2.462800000  | 0.213366000  |
| 6  | -1.123120000 | -0.838521000 | 1.440894000  |
| 6  | -1.693735000 | -0.611571000 | 2.706995000  |
| 1  | -1.417164000 | 0.293473000  | 3.249296000  |
| 6  | -2.599074000 | -1.490549000 | 3.290063000  |
| 1  | -3.012939000 | -1.271209000 | 4.272624000  |
| 6  | -2.984499000 | -2.644927000 | 2.613929000  |
| 1  | -3.699819000 | -3.334596000 | 3.056243000  |
| 6  | -2.473268000 | -2.889362000 | 1.345852000  |
| 1  | -2.803319000 | -3.758283000 | 0.779074000  |
| 6  | -1.559992000 | -1.997843000 | 0.779623000  |
| 6  | 1.490237000  | -0.246039000 | 1.299686000  |
| 6  | 1.756392000  | -0.638454000 | 2.624616000  |
| 1  | 0.926326000  | -0.690552000 | 3.329824000  |
| 6  | 3.029043000  | -0.980514000 | 3.066137000  |
| 1  | 3.182485000  | -1.279844000 | 4.101382000  |
| 6  | 4.101235000  | -0.963263000 | 2.179258000  |
| 1  | 5.097469000  | -1.252457000 | 2.506099000  |
| 6  | 3.878648000  | -0.607589000 | 0.855307000  |
| 1  | 4.691802000  | -0.646397000 | 0.133977000  |
| 6  | 2.597348000  | -0.239911000 | 0.434057000  |
| 16 | 2.346252000  | 0.019670000  | -1.325393000 |
| 16 | -1.526408000 | 1.787325000  | -1.403728000 |
| 16 | -1.087467000 | -2.263358000 | -0.928966000 |
| 23 | -0.073176000 | -0.179073000 | -1.785929000 |
| 6  | -3.369844000 | 1.468150000  | -1.333971000 |
| 1  | -3.800086000 | 2.476688000  | -1.288130000 |
| 6  | 0.073284000  | -3.728447000 | -0.827074000 |
| 1  | -0.578253000 | -4.546376000 | -0.494026000 |
| 6  | 2.985380000  | 1.752003000  | -1.640615000 |
| 1  | 2.776160000  | 1.838317000  | -2.714365000 |
| 6  | 4.478386000  | 1.822928000  | -1.396099000 |
| 1  | 4.864528000  | 2.790326000  | -1.734580000 |
| 1  | 4.710919000  | 1.741080000  | -0.329895000 |
| 1  | 5.026248000  | 1.039713000  | -1.926366000 |
| 6  | 2.219351000  | 2.803813000  | -0.872576000 |
| 1  | 2.286892000  | 2.641583000  | 0.208509000  |
| 1  | 2.632239000  | 3.796911000  | -1.082359000 |
| 1  | 1.161977000  | 2.819332000  | -1.142523000 |
| 6  | -3.742303000 | 0.801329000  | -2.642001000 |
| 1  | -3.437985000 | 1.389453000  | -3.511809000 |

|   |              |              |              |
|---|--------------|--------------|--------------|
| 1 | -3.270479000 | -0.183830000 | -2.726805000 |
| 1 | -4.826192000 | 0.657647000  | -2.693738000 |
| 6 | -3.788343000 | 0.665441000  | -0.125397000 |
| 1 | -3.432855000 | 1.102147000  | 0.811807000  |
| 1 | -4.882067000 | 0.615117000  | -0.076125000 |
| 1 | -3.413356000 | -0.359940000 | -0.179298000 |
| 6 | 0.566280000  | -3.993094000 | -2.234554000 |
| 1 | 1.202793000  | -4.883497000 | -2.247080000 |
| 1 | -0.253282000 | -4.154594000 | -2.939727000 |
| 1 | 1.162017000  | -3.151662000 | -2.605246000 |
| 6 | 1.196923000  | -3.517879000 | 0.159716000  |
| 1 | 1.880816000  | -2.735153000 | -0.179352000 |
| 1 | 0.835595000  | -3.239090000 | 1.153363000  |
| 1 | 1.777624000  | -4.441558000 | 0.262902000  |
| 5 | -0.001860000 | 0.167923000  | 0.901240000  |
| 7 | -0.081397000 | -0.324720000 | -3.472010000 |
| 1 | -0.072708000 | -0.405743000 | -4.489001000 |

$[11f'_{SB}]_{alt}$  (TE = -3323.941554)

|   |              |              |              |
|---|--------------|--------------|--------------|
| 6 | -0.309543000 | -1.317628000 | -1.558709000 |
| 6 | 0.210350000  | -1.747659000 | -2.792861000 |
| 1 | 0.917053000  | -1.099479000 | -3.311792000 |
| 6 | -0.136307000 | -2.963159000 | -3.373061000 |
| 1 | 0.293733000  | -3.248519000 | -4.330849000 |
| 6 | -1.026754000 | -3.816849000 | -2.729378000 |
| 1 | -1.300215000 | -4.771328000 | -3.172315000 |
| 6 | -1.549787000 | -3.446135000 | -1.496110000 |
| 1 | -2.222917000 | -4.114129000 | -0.961925000 |
| 6 | -1.192663000 | -2.220357000 | -0.934904000 |
| 6 | -1.034184000 | 1.265871000  | -1.308130000 |
| 6 | -1.553137000 | 1.366826000  | -2.612173000 |
| 1 | -1.243175000 | 0.630398000  | -3.354838000 |
| 6 | -2.445445000 | 2.362841000  | -2.990751000 |
| 1 | -2.814946000 | 2.401077000  | -4.013415000 |
| 6 | -2.872879000 | 3.304828000  | -2.059460000 |
| 1 | -3.576248000 | 4.084455000  | -2.341813000 |
| 6 | -2.415448000 | 3.220714000  | -0.750927000 |
| 1 | -2.774876000 | 3.920529000  | 0.001298000  |
| 6 | -1.510925000 | 2.219447000  | -0.390755000 |
| 6 | 1.582683000  | 0.628499000  | -1.237165000 |
| 6 | 1.890919000  | 1.345508000  | -2.407968000 |
| 1 | 1.090807000  | 1.547271000  | -3.120331000 |
| 6 | 3.164812000  | 1.827729000  | -2.685367000 |
| 1 | 3.347538000  | 2.379026000  | -3.605400000 |
| 6 | 4.197191000  | 1.627322000  | -1.775335000 |

|    |              |              |              |
|----|--------------|--------------|--------------|
| 1  | 5.192340000  | 2.020915000  | -1.967508000 |
| 6  | 3.936269000  | 0.939889000  | -0.597265000 |
| 1  | 4.718839000  | 0.813401000  | 0.147143000  |
| 6  | 2.656733000  | 0.436369000  | -0.347596000 |
| 16 | 2.385808000  | -0.322996000 | 1.268802000  |
| 16 | -1.775368000 | -1.846560000 | 0.726203000  |
| 16 | -1.086947000 | 2.078464000  | 1.351537000  |
| 23 | -0.074576000 | -0.195400000 | 1.404560000  |
| 6  | -3.624461000 | -1.503620000 | 0.533658000  |
| 1  | -4.044229000 | -2.481871000 | 0.270940000  |
| 6  | 0.078640000  | 3.517301000  | 1.635882000  |
| 1  | -0.563260000 | 4.400574000  | 1.533226000  |
| 6  | 3.069006000  | -2.067055000 | 1.027756000  |
| 1  | 2.875733000  | -2.488432000 | 2.027334000  |
| 6  | 4.560370000  | -2.035158000 | 0.774707000  |
| 1  | 4.965367000  | -3.052331000 | 0.792032000  |
| 1  | 4.783513000  | -1.619971000 | -0.212224000 |
| 1  | 5.098732000  | -1.446064000 | 1.521502000  |
| 6  | 2.310685000  | -2.838825000 | -0.024541000 |
| 1  | 2.404843000  | -2.363579000 | -1.005993000 |
| 1  | 2.706528000  | -3.856417000 | -0.113764000 |
| 1  | 1.242275000  | -2.902299000 | 0.204116000  |
| 6  | -4.104055000 | -1.072801000 | 1.902933000  |
| 1  | -3.895538000 | -1.823483000 | 2.674725000  |
| 1  | -3.634260000 | -0.127424000 | 2.201891000  |
| 1  | -5.185373000 | -0.908619000 | 1.896785000  |
| 6  | -3.909195000 | -0.491044000 | -0.546478000 |
| 1  | -3.464923000 | -0.771363000 | -1.504982000 |
| 1  | -4.991058000 | -0.404847000 | -0.695677000 |
| 1  | -3.530061000 | 0.498465000  | -0.278858000 |
| 6  | 0.567917000  | 3.391459000  | 3.063584000  |
| 1  | 1.217374000  | 4.233972000  | 3.319151000  |
| 1  | -0.252460000 | 3.374413000  | 3.787091000  |
| 1  | 1.159402000  | 2.475001000  | 3.188716000  |
| 6  | 1.205785000  | 3.562071000  | 0.632900000  |
| 1  | 1.879678000  | 2.709825000  | 0.755177000  |
| 1  | 0.847706000  | 3.559129000  | -0.399997000 |
| 1  | 1.794474000  | 4.474490000  | 0.777661000  |
| 5  | 0.071557000  | 0.141447000  | -1.021431000 |
| 7  | -0.389583000 | -0.947476000 | 3.548829000  |
| 1  | 0.283812000  | -0.667202000 | 4.262550000  |
| 1  | -1.315810000 | -0.737185000 | 3.924303000  |
| 7  | -0.314752000 | -2.410638000 | 3.465315000  |
| 1  | 0.609272000  | -2.635465000 | 3.061417000  |
| 1  | -0.479659000 | -2.922051000 | 4.346477000  |
| 1  | -0.995766000 | -2.689677000 | 2.724732000  |

[11f''<sub>SB</sub>]<sub>dis</sub> (TE = -3267.535660)

|    |              |              |              |
|----|--------------|--------------|--------------|
| 6  | -0.716988000 | 1.939178000  | 0.586044000  |
| 6  | -0.329269000 | 3.065319000  | 1.336187000  |
| 1  | 0.574750000  | 3.004880000  | 1.940792000  |
| 6  | -1.085163000 | 4.229698000  | 1.360628000  |
| 1  | -0.767252000 | 5.071111000  | 1.971347000  |
| 6  | -2.249049000 | 4.320717000  | 0.601570000  |
| 1  | -2.843122000 | 5.230940000  | 0.611672000  |
| 6  | -2.626507000 | 3.259437000  | -0.213536000 |
| 1  | -3.492024000 | 3.354136000  | -0.865568000 |
| 6  | -1.870935000 | 2.089400000  | -0.218825000 |
| 6  | -0.920651000 | -0.664931000 | 1.219475000  |
| 6  | -1.590449000 | -0.323495000 | 2.416154000  |
| 1  | -1.523694000 | 0.699965000  | 2.782220000  |
| 6  | -2.318670000 | -1.241600000 | 3.160181000  |
| 1  | -2.787914000 | -0.926625000 | 4.089079000  |
| 6  | -2.469836000 | -2.546349000 | 2.704247000  |
| 1  | -3.054332000 | -3.269021000 | 3.267155000  |
| 6  | -1.889998000 | -2.908533000 | 1.498053000  |
| 1  | -2.039778000 | -3.908412000 | 1.096871000  |
| 6  | -1.109412000 | -1.993753000 | 0.784575000  |
| 6  | 1.501370000  | 0.486764000  | 1.368577000  |
| 6  | 1.690316000  | 0.648534000  | 2.752045000  |
| 1  | 0.830884000  | 0.872527000  | 3.383341000  |
| 6  | 2.940247000  | 0.520327000  | 3.345586000  |
| 1  | 3.044476000  | 0.657483000  | 4.419235000  |
| 6  | 4.051496000  | 0.198399000  | 2.572379000  |
| 1  | 5.028374000  | 0.076251000  | 3.032779000  |
| 6  | 3.901091000  | 0.014967000  | 1.204871000  |
| 1  | 4.751585000  | -0.269313000 | 0.589885000  |
| 6  | 2.643472000  | 0.175567000  | 0.618774000  |
| 16 | 2.502387000  | -0.108073000 | -1.146811000 |
| 16 | -2.223366000 | 0.845520000  | -1.457943000 |
| 16 | -0.491092000 | -2.566341000 | -0.797113000 |
| 23 | 0.012996000  | -0.286205000 | -1.516285000 |
| 6  | -3.937402000 | 0.166463000  | -1.132809000 |
| 1  | -4.590532000 | 0.947888000  | -1.537817000 |
| 6  | 0.927638000  | -3.730546000 | -0.384225000 |
| 1  | 0.394637000  | -4.641727000 | -0.088421000 |
| 6  | 3.026092000  | 1.558515000  | -1.844820000 |
| 1  | 2.808273000  | 1.417095000  | -2.909027000 |
| 6  | 4.513609000  | 1.753964000  | -1.643811000 |
| 1  | 4.834717000  | 2.657910000  | -2.170733000 |
| 1  | 4.760791000  | 1.896531000  | -0.587953000 |
| 1  | 5.102957000  | 0.917481000  | -2.026027000 |

|   |              |              |              |
|---|--------------|--------------|--------------|
| 6 | 2.200633000  | 2.694139000  | -1.285942000 |
| 1 | 2.326993000  | 2.785009000  | -0.202332000 |
| 1 | 2.530777000  | 3.638965000  | -1.729685000 |
| 1 | 1.135674000  | 2.580546000  | -1.500569000 |
| 6 | -4.051356000 | -1.087747000 | -1.974854000 |
| 1 | -3.822903000 | -0.911335000 | -3.029177000 |
| 1 | -3.383278000 | -1.873465000 | -1.606041000 |
| 1 | -5.072699000 | -1.475054000 | -1.920773000 |
| 6 | -4.239888000 | -0.065456000 | 0.326374000  |
| 1 | -4.021507000 | 0.806905000  | 0.947667000  |
| 1 | -5.306741000 | -0.287113000 | 0.436194000  |
| 1 | -3.684843000 | -0.918273000 | 0.721614000  |
| 6 | 1.677729000  | -3.961144000 | -1.678934000 |
| 1 | 2.447855000  | -4.722284000 | -1.524962000 |
| 1 | 1.028640000  | -4.310139000 | -2.485877000 |
| 1 | 2.182997000  | -3.048738000 | -2.012653000 |
| 6 | 1.800953000  | -3.245312000 | 0.745536000  |
| 1 | 2.410537000  | -2.390267000 | 0.448223000  |
| 1 | 1.232177000  | -2.968309000 | 1.636961000  |
| 1 | 2.488056000  | -4.047822000 | 1.032877000  |
| 5 | 0.028343000  | 0.573312000  | 0.789386000  |
| 7 | 0.284086000  | 0.438142000  | -3.226053000 |
| 1 | 1.121517000  | 0.423579000  | -3.800319000 |
| 1 | -0.496528000 | 0.725030000  | -3.811108000 |

[12f'<sub>SB</sub>] (TE = -3267.691925)

|   |              |              |             |
|---|--------------|--------------|-------------|
| 6 | -1.444903000 | 0.467209000  | 1.433116000 |
| 6 | -1.518172000 | 0.840781000  | 2.789073000 |
| 1 | -0.637014000 | 0.700719000  | 3.415631000 |
| 6 | -2.658892000 | 1.389492000  | 3.361628000 |
| 1 | -2.661305000 | 1.660821000  | 4.415729000 |
| 6 | -3.792967000 | 1.603066000  | 2.583006000 |
| 1 | -4.689133000 | 2.043086000  | 3.014685000 |
| 6 | -3.757807000 | 1.273362000  | 1.235401000 |
| 1 | -4.619889000 | 1.469321000  | 0.599908000 |
| 6 | -2.604162000 | 0.713536000  | 0.679099000 |
| 6 | 0.176116000  | -1.715504000 | 1.143460000 |
| 6 | -0.363524000 | -2.352831000 | 2.276766000 |
| 1 | -1.040959000 | -1.788285000 | 2.917883000 |
| 6 | -0.054360000 | -3.664609000 | 2.619253000 |
| 1 | -0.491199000 | -4.109697000 | 3.511545000 |
| 6 | 0.811344000  | -4.408723000 | 1.822935000 |
| 1 | 1.056085000  | -5.437145000 | 2.078913000 |
| 6 | 1.331327000  | -3.834985000 | 0.668373000 |
| 1 | 1.964975000  | -4.419511000 | 0.003457000 |
| 6 | 1.017101000  | -2.516080000 | 0.339471000 |

|    |              |              |              |
|----|--------------|--------------|--------------|
| 6  | 1.212579000  | 0.745359000  | 1.169594000  |
| 6  | 1.899139000  | 0.585903000  | 2.387227000  |
| 1  | 1.563947000  | -0.190629000 | 3.076424000  |
| 6  | 2.999818000  | 1.360534000  | 2.734426000  |
| 1  | 3.498414000  | 1.200408000  | 3.688700000  |
| 6  | 3.481370000  | 2.322718000  | 1.850497000  |
| 1  | 4.356661000  | 2.917688000  | 2.101469000  |
| 6  | 2.850587000  | 2.494666000  | 0.624432000  |
| 1  | 3.243421000  | 3.204627000  | -0.100594000 |
| 6  | 1.726413000  | 1.727647000  | 0.306969000  |
| 16 | 1.004839000  | 1.898009000  | -1.326981000 |
| 16 | -2.637889000 | 0.416569000  | -1.098806000 |
| 16 | 1.542540000  | -1.896406000 | -1.259188000 |
| 23 | -0.289714000 | -0.201502000 | -1.645027000 |
| 6  | -3.693847000 | -1.132202000 | -1.120073000 |
| 1  | -4.565813000 | -0.832846000 | -0.524461000 |
| 6  | 3.401646000  | -1.687850000 | -1.164675000 |
| 1  | 3.782736000  | -2.699126000 | -1.353898000 |
| 6  | 0.035121000  | 3.502320000  | -1.244147000 |
| 1  | -0.708371000 | 3.335037000  | -2.033791000 |
| 6  | 0.933418000  | 4.665436000  | -1.615793000 |
| 1  | 0.345251000  | 5.586709000  | -1.691803000 |
| 1  | 1.696907000  | 4.835659000  | -0.849994000 |
| 1  | 1.441140000  | 4.510466000  | -2.570466000 |
| 6  | -0.652757000 | 3.704909000  | 0.086618000  |
| 1  | 0.072779000  | 3.807494000  | 0.900108000  |
| 1  | -1.243096000 | 4.627261000  | 0.058784000  |
| 1  | -1.323305000 | 2.884714000  | 0.342399000  |
| 6  | -4.113357000 | -1.422148000 | -2.544680000 |
| 1  | -4.581141000 | -0.559760000 | -3.027243000 |
| 1  | -3.255169000 | -1.736745000 | -3.144118000 |
| 1  | -4.836643000 | -2.243934000 | -2.556560000 |
| 6  | -2.985461000 | -2.296359000 | -0.465272000 |
| 1  | -2.664016000 | -2.064417000 | 0.553649000  |
| 1  | -3.655094000 | -3.162725000 | -0.415484000 |
| 1  | -2.100023000 | -2.588647000 | -1.041002000 |
| 6  | 3.778498000  | -0.776629000 | -2.315659000 |
| 1  | 4.867881000  | -0.708844000 | -2.401920000 |
| 1  | 3.391231000  | -1.132380000 | -3.274983000 |
| 1  | 3.393364000  | 0.236149000  | -2.155256000 |
| 6  | 3.907865000  | -1.192345000 | 0.168981000  |
| 1  | 3.641443000  | -0.147736000 | 0.339176000  |
| 1  | 3.523800000  | -1.779975000 | 1.007174000  |
| 1  | 5.001544000  | -1.263598000 | 0.189563000  |
| 5  | -0.077780000 | -0.163721000 | 0.886603000  |
| 7  | -0.689231000 | -1.072180000 | -3.341018000 |

|   |              |              |              |
|---|--------------|--------------|--------------|
| 1 | -1.476649000 | -0.927291000 | -3.966571000 |
| 1 | -0.072878000 | -1.736514000 | -3.803193000 |

[13f''<sub>SB</sub>] (TE = -3268.143326)

|    |              |              |              |
|----|--------------|--------------|--------------|
| 6  | -0.459245000 | 1.893438000  | 0.730601000  |
| 6  | 0.014633000  | 2.896142000  | 1.597545000  |
| 1  | 0.804365000  | 2.644867000  | 2.304578000  |
| 6  | -0.502861000 | 4.186434000  | 1.601690000  |
| 1  | -0.115646000 | 4.922335000  | 2.302940000  |
| 6  | -1.510573000 | 4.539728000  | 0.708985000  |
| 1  | -1.916387000 | 5.548105000  | 0.701805000  |
| 6  | -1.970357000 | 3.598750000  | -0.203466000 |
| 1  | -2.718840000 | 3.873112000  | -0.944169000 |
| 6  | -1.454400000 | 2.302854000  | -0.182595000 |
| 6  | -1.022134000 | -0.618006000 | 1.484250000  |
| 6  | -1.645178000 | -0.272109000 | 2.697538000  |
| 1  | -1.414285000 | 0.694019000  | 3.147484000  |
| 6  | -2.554149000 | -1.107208000 | 3.335544000  |
| 1  | -3.006406000 | -0.798632000 | 4.275469000  |
| 6  | -2.900705000 | -2.329047000 | 2.764419000  |
| 1  | -3.620838000 | -2.982858000 | 3.249714000  |
| 6  | -2.339931000 | -2.693647000 | 1.548078000  |
| 1  | -2.632913000 | -3.623547000 | 1.064398000  |
| 6  | -1.411491000 | -1.849683000 | 0.934607000  |
| 6  | 1.564922000  | 0.188263000  | 1.402450000  |
| 6  | 1.785158000  | 0.232332000  | 2.792227000  |
| 1  | 0.928051000  | 0.363948000  | 3.452114000  |
| 6  | 3.046059000  | 0.104736000  | 3.361048000  |
| 1  | 3.158788000  | 0.146950000  | 4.442096000  |
| 6  | 4.159676000  | -0.094568000 | 2.550901000  |
| 1  | 5.149847000  | -0.208494000 | 2.984450000  |
| 6  | 3.987842000  | -0.179708000 | 1.177501000  |
| 1  | 4.837538000  | -0.383769000 | 0.529975000  |
| 6  | 2.713774000  | -0.027583000 | 0.621174000  |
| 16 | 2.595126000  | -0.345605000 | -1.152765000 |
| 16 | -1.936030000 | 1.188879000  | -1.504789000 |
| 16 | -0.814719000 | -2.324433000 | -0.688983000 |
| 23 | 0.138668000  | -0.203422000 | -1.486112000 |
| 6  | -3.727430000 | 0.703633000  | -1.216955000 |
| 1  | -4.276682000 | 1.557330000  | -1.630564000 |
| 6  | 0.407427000  | -3.699651000 | -0.350906000 |
| 1  | -0.237048000 | -4.538219000 | -0.060909000 |
| 6  | 2.985178000  | 1.290230000  | -1.975193000 |
| 1  | 3.115598000  | 0.970452000  | -3.017085000 |
| 6  | 4.273104000  | 1.884058000  | -1.453373000 |

|   |              |              |              |
|---|--------------|--------------|--------------|
| 1 | 4.514600000  | 2.793132000  | -2.012523000 |
| 1 | 4.186189000  | 2.162958000  | -0.399441000 |
| 1 | 5.115372000  | 1.196232000  | -1.555311000 |
| 6 | 1.812279000  | 2.244077000  | -1.861284000 |
| 1 | 1.589204000  | 2.494766000  | -0.820869000 |
| 1 | 2.020509000  | 3.182380000  | -2.386398000 |
| 1 | 0.890559000  | 1.860393000  | -2.335700000 |
| 6 | -3.975893000 | -0.528080000 | -2.062085000 |
| 1 | -3.707714000 | -0.377003000 | -3.112152000 |
| 1 | -3.415942000 | -1.389005000 | -1.682301000 |
| 1 | -5.038073000 | -0.788404000 | -2.032828000 |
| 6 | -4.075700000 | 0.517638000  | 0.239085000  |
| 1 | -3.778283000 | 1.370844000  | 0.853951000  |
| 1 | -5.161798000 | 0.410765000  | 0.331434000  |
| 1 | -3.617327000 | -0.380675000 | 0.655939000  |
| 6 | 1.088127000  | -4.002996000 | -1.670272000 |
| 1 | 1.753034000  | -4.864246000 | -1.559769000 |
| 1 | 0.373619000  | -4.240028000 | -2.463990000 |
| 1 | 1.703702000  | -3.158229000 | -1.999697000 |
| 6 | 1.371552000  | -3.372945000 | 0.763865000  |
| 1 | 2.061124000  | -2.574308000 | 0.481125000  |
| 1 | 0.862873000  | -3.068587000 | 1.682149000  |
| 1 | 1.972702000  | -4.257772000 | 0.997173000  |
| 5 | 0.063471000  | 0.393322000  | 0.883704000  |
| 7 | 0.074212000  | -0.668607000 | -3.696189000 |
| 1 | -0.159508000 | 0.115879000  | -4.302239000 |
| 1 | 0.929464000  | -1.060618000 | -4.085651000 |
| 1 | -0.643780000 | -1.365704000 | -3.887504000 |

[14f'<sub>SB</sub>] (TE = -3268.265203)

|   |              |              |              |
|---|--------------|--------------|--------------|
| 6 | -0.300869000 | 1.708221000  | 1.125344000  |
| 6 | 0.138954000  | 2.334809000  | 2.305795000  |
| 1 | 0.734064000  | 1.752822000  | 3.011228000  |
| 6 | -0.141129000 | 3.664126000  | 2.604535000  |
| 1 | 0.226104000  | 4.102614000  | 3.530939000  |
| 6 | -0.882698000 | 4.434676000  | 1.714435000  |
| 1 | -1.102380000 | 5.477808000  | 1.931764000  |
| 6 | -1.315860000 | 3.863672000  | 0.523395000  |
| 1 | -1.860127000 | 4.461956000  | -0.205658000 |
| 6 | -1.026569000 | 2.527692000  | 0.239655000  |
| 6 | -1.135341000 | -0.835670000 | 1.456882000  |
| 6 | -1.681551000 | -0.599014000 | 2.732156000  |
| 1 | -1.348955000 | 0.281537000  | 3.283545000  |
| 6 | -2.633526000 | -1.429385000 | 3.314265000  |
| 1 | -3.025379000 | -1.197266000 | 4.303175000  |
| 6 | -3.090304000 | -2.550161000 | 2.628289000  |



|    |              |              |              |
|----|--------------|--------------|--------------|
| 1  | -3.840548000 | -3.204005000 | 3.067904000  |
| 6  | -2.597796000 | -2.809297000 | 1.354771000  |
| 1  | -2.973826000 | -3.656601000 | 0.783512000  |
| 6  | -1.642476000 | -1.965208000 | 0.784891000  |
| 6  | 1.506259000  | -0.319204000 | 1.248368000  |
| 6  | 1.786102000  | -0.777139000 | 2.549333000  |
| 1  | 0.971383000  | -0.807266000 | 3.274009000  |
| 6  | 3.044420000  | -1.218516000 | 2.944759000  |
| 1  | 3.202562000  | -1.569384000 | 3.963237000  |
| 6  | 4.091933000  | -1.232115000 | 2.030627000  |
| 1  | 5.076233000  | -1.596640000 | 2.316847000  |
| 6  | 3.859563000  | -0.799543000 | 0.730156000  |
| 1  | 4.654099000  | -0.846718000 | -0.011364000 |
| 6  | 2.594876000  | -0.338863000 | 0.352017000  |
| 16 | 2.351537000  | 0.050468000  | -1.394948000 |
| 16 | -1.466874000 | 1.912979000  | -1.395675000 |
| 16 | -1.190475000 | -2.275928000 | -0.930625000 |
| 23 | -0.112419000 | -0.145384000 | -1.534235000 |
| 6  | -3.337121000 | 1.699958000  | -1.250615000 |
| 1  | -3.718644000 | 2.725653000  | -1.170430000 |
| 6  | -0.081506000 | -3.797277000 | -0.777574000 |
| 1  | -0.761722000 | -4.595047000 | -0.453629000 |
| 6  | 3.101669000  | 1.779594000  | -1.544596000 |
| 1  | 2.894958000  | 1.986022000  | -2.603672000 |
| 6  | 4.597009000  | 1.746150000  | -1.310064000 |
| 1  | 5.041222000  | 2.716220000  | -1.561056000 |
| 1  | 4.827828000  | 1.551898000  | -0.258108000 |
| 1  | 5.096672000  | 0.982694000  | -1.912873000 |
| 6  | 2.397075000  | 2.789262000  | -0.671282000 |
| 1  | 2.473447000  | 2.521290000  | 0.388117000  |
| 1  | 2.848942000  | 3.780729000  | -0.792703000 |
| 1  | 1.336234000  | 2.870204000  | -0.915175000 |
| 6  | -3.788669000 | 1.070930000  | -2.551546000 |
| 1  | -3.495898000 | 1.662785000  | -3.424850000 |
| 1  | -3.357902000 | 0.066800000  | -2.659416000 |
| 1  | -4.877985000 | 0.964077000  | -2.571658000 |
| 6  | -3.738551000 | 0.887035000  | -0.044021000 |
| 1  | -3.347254000 | 1.303767000  | 0.888037000  |
| 1  | -4.831121000 | 0.850184000  | 0.039283000  |
| 1  | -3.376111000 | -0.142022000 | -0.123767000 |
| 6  | 0.434108000  | -4.078323000 | -2.172759000 |
| 1  | 1.051172000  | -4.982518000 | -2.182841000 |
| 1  | -0.375409000 | -4.219223000 | -2.896326000 |
| 1  | 1.062536000  | -3.247894000 | -2.520990000 |
| 6  | 1.031104000  | -3.604333000 | 0.223091000  |
| 1  | 1.715323000  | -2.813754000 | -0.098902000 |

|   |              |              |              |
|---|--------------|--------------|--------------|
| 1 | 0.657503000  | -3.334416000 | 1.214557000  |
| 1 | 1.612877000  | -4.528015000 | 0.325306000  |
| 5 | 0.009378000  | 0.150549000  | 0.909999000  |
| 7 | -0.278852000 | -0.446516000 | -3.773462000 |
| 1 | -0.659789000 | 0.358686000  | -4.265203000 |
| 1 | 0.608118000  | -0.648590000 | -4.228878000 |
| 1 | -0.889172000 | -1.224450000 | -4.014187000 |

Cartesian coordinates of the intermediate and TS involved in the conversion of [4]→[5]<sub>alt</sub> for the catalysts [**1c''<sub>PB</sub>**] and [**1f''<sub>SB</sub>**], along with their total energies (in hartree) including zero point vibrational correction at M06-L-D3(heptane)/6-311+G\* level of theory.

For catalyst [**1c''<sub>PB</sub>**]

[**4c''<sub>PB</sub>** -V-H]<sup>+</sup> (TE= -3507.088650)

|    |              |              |              |
|----|--------------|--------------|--------------|
| 6  | 1.567069000  | -0.653872000 | 1.844241000  |
| 6  | 1.848572000  | -1.579368000 | 2.866937000  |
| 1  | 1.023541000  | -2.119171000 | 3.330452000  |
| 6  | 3.141170000  | -1.809021000 | 3.324580000  |
| 1  | 3.316074000  | -2.522805000 | 4.125823000  |
| 6  | 4.203390000  | -1.129002000 | 2.744624000  |
| 1  | 5.220822000  | -1.297200000 | 3.089153000  |
| 6  | 3.963603000  | -0.250426000 | 1.692119000  |
| 1  | 4.811676000  | 0.233638000  | 1.215202000  |
| 6  | 2.669712000  | -0.004616000 | 1.228848000  |
| 6  | -0.576924000 | 1.060156000  | 1.918802000  |
| 6  | -0.131889000 | 1.541101000  | 3.166861000  |
| 1  | 0.763534000  | 1.112153000  | 3.614003000  |
| 6  | -0.834588000 | 2.512723000  | 3.873995000  |
| 1  | -0.473760000 | 2.840141000  | 4.845920000  |
| 6  | -1.988618000 | 3.059743000  | 3.332597000  |
| 1  | -2.549449000 | 3.814146000  | 3.878767000  |
| 6  | -2.410833000 | 2.658485000  | 2.066212000  |
| 1  | -3.289987000 | 3.128605000  | 1.628802000  |
| 6  | -1.725689000 | 1.679787000  | 1.351369000  |
| 6  | -0.976574000 | -1.561202000 | 1.655962000  |
| 6  | -1.741231000 | -1.740741000 | 2.820049000  |
| 1  | -1.659614000 | -1.014173000 | 3.629224000  |
| 6  | -2.604487000 | -2.819652000 | 2.962709000  |
| 1  | -3.180294000 | -2.939246000 | 3.877402000  |
| 6  | -2.749559000 | -3.728047000 | 1.919849000  |
| 1  | -3.439654000 | -4.563256000 | 2.010443000  |
| 6  | -2.024114000 | -3.553966000 | 0.747387000  |
| 1  | -2.181472000 | -4.250029000 | -0.072104000 |
| 6  | -1.126301000 | -2.490326000 | 0.609116000  |
| 23 | 0.091819000  | 0.499402000  | -1.169572000 |

|    |              |              |              |
|----|--------------|--------------|--------------|
| 6  | 2.821207000  | 2.708411000  | 0.048189000  |
| 1  | 3.890290000  | 2.707809000  | 0.301538000  |
| 6  | -3.851486000 | 0.629362000  | -0.430268000 |
| 1  | -4.515629000 | 1.460855000  | -0.163390000 |
| 6  | 1.146124000  | -3.426724000 | -1.059748000 |
| 1  | 1.004479000  | -3.888123000 | -2.044349000 |
| 6  | 1.049743000  | -4.512202000 | 0.002343000  |
| 1  | 1.854317000  | -5.241244000 | -0.138893000 |
| 1  | 1.157092000  | -4.097935000 | 1.010533000  |
| 1  | 0.105653000  | -5.060828000 | -0.022446000 |
| 6  | 2.519759000  | -2.780745000 | -1.053344000 |
| 1  | 2.741160000  | -2.300874000 | -0.095449000 |
| 1  | 3.296016000  | -3.534171000 | -1.223657000 |
| 1  | 2.614035000  | -2.031768000 | -1.841904000 |
| 6  | 2.601591000  | 3.573589000  | -1.187659000 |
| 1  | 3.157481000  | 3.225955000  | -2.063043000 |
| 1  | 1.543025000  | 3.598770000  | -1.462460000 |
| 1  | 2.918598000  | 4.602814000  | -0.992176000 |
| 6  | 2.053116000  | 3.244996000  | 1.243462000  |
| 1  | 2.242312000  | 2.665553000  | 2.151248000  |
| 1  | 2.352040000  | 4.278918000  | 1.444547000  |
| 1  | 0.973920000  | 3.243349000  | 1.065460000  |
| 6  | -4.173513000 | 0.167813000  | -1.847917000 |
| 1  | -5.235222000 | -0.079652000 | -1.945248000 |
| 1  | -3.940395000 | 0.911707000  | -2.616139000 |
| 1  | -3.607357000 | -0.734690000 | -2.098307000 |
| 6  | -4.075479000 | -0.483535000 | 0.576682000  |
| 1  | -3.477026000 | -1.368590000 | 0.348463000  |
| 1  | -3.840122000 | -0.177647000 | 1.599275000  |
| 1  | -5.125542000 | -0.794153000 | 0.559475000  |
| 5  | 0.035211000  | -0.360157000 | 1.647274000  |
| 15 | 2.419334000  | 0.929495000  | -0.337537000 |
| 15 | -2.130903000 | 1.354476000  | -0.406483000 |
| 15 | -0.239822000 | -2.147204000 | -0.958915000 |
| 6  | -2.405725000 | 3.042994000  | -1.233463000 |
| 1  | -2.052184000 | 2.839742000  | -2.254298000 |
| 6  | -1.546149000 | 4.167583000  | -0.663788000 |
| 1  | -1.546334000 | 5.010700000  | -1.361720000 |
| 1  | -1.941692000 | 4.540229000  | 0.285042000  |
| 1  | -0.508968000 | 3.874875000  | -0.501058000 |
| 6  | -3.851048000 | 3.524960000  | -1.318204000 |
| 1  | -3.875796000 | 4.477068000  | -1.857686000 |
| 1  | -4.520072000 | 2.845914000  | -1.848398000 |
| 1  | -4.284838000 | 3.718845000  | -0.331414000 |
| 6  | 3.862543000  | 0.395867000  | -1.434986000 |
| 1  | 4.076940000  | -0.622492000 | -1.089088000 |

|   |              |              |              |
|---|--------------|--------------|--------------|
| 6 | 5.147204000  | 1.210446000  | -1.314421000 |
| 1 | 5.930674000  | 0.738344000  | -1.915974000 |
| 1 | 5.032664000  | 2.229144000  | -1.694122000 |
| 1 | 5.533804000  | 1.284956000  | -0.296090000 |
| 6 | 3.430989000  | 0.327183000  | -2.897271000 |
| 1 | 4.228203000  | -0.106686000 | -3.509277000 |
| 1 | 2.528723000  | -0.273638000 | -3.046838000 |
| 1 | 3.227490000  | 1.324784000  | -3.300972000 |
| 6 | -1.453458000 | -2.711556000 | -2.283181000 |
| 1 | -2.429362000 | -2.501687000 | -1.822131000 |
| 6 | -1.311615000 | -1.863063000 | -3.542116000 |
| 1 | -0.293956000 | -1.912695000 | -3.949902000 |
| 1 | -1.984668000 | -2.226609000 | -4.325421000 |
| 1 | -1.544503000 | -0.809482000 | -3.372677000 |
| 6 | -1.398808000 | -4.192240000 | -2.650887000 |
| 1 | -0.556953000 | -4.411323000 | -3.314126000 |
| 1 | -1.321239000 | -4.868864000 | -1.797316000 |
| 1 | -2.304127000 | -4.466280000 | -3.201579000 |
| 7 | 0.056136000  | 1.556589000  | -3.966332000 |
| 7 | 0.172754000  | 1.107357000  | -2.834684000 |
| 1 | 0.979160000  | 1.746285000  | -4.409277000 |
| 1 | 0.131002000  | 2.086074000  | -0.695003000 |

**TS3<sub>alt</sub>** (Triplet, TE= -3507.073336)

|   |              |              |             |
|---|--------------|--------------|-------------|
| 6 | -1.561278000 | 0.620061000  | 1.917348000 |
| 6 | -1.654366000 | 1.303172000  | 3.143561000 |
| 1 | -0.747149000 | 1.482304000  | 3.718675000 |
| 6 | -2.864820000 | 1.760242000  | 3.651235000 |
| 1 | -2.889026000 | 2.284291000  | 4.604186000 |
| 6 | -4.040099000 | 1.555808000  | 2.937040000 |
| 1 | -4.991726000 | 1.913985000  | 3.321741000 |
| 6 | -3.983946000 | 0.903976000  | 1.712210000 |
| 1 | -4.902187000 | 0.770877000  | 1.145709000 |
| 6 | -2.766181000 | 0.443267000  | 1.200612000 |
| 6 | 0.218810000  | -1.464626000 | 1.833585000 |
| 6 | -0.371771000 | -2.058906000 | 2.963390000 |
| 1 | -1.187942000 | -1.539440000 | 3.465163000 |
| 6 | 0.076743000  | -3.269043000 | 3.477307000 |
| 1 | -0.397188000 | -3.693230000 | 4.359847000 |
| 6 | 1.143442000  | -3.930126000 | 2.874387000 |
| 1 | 1.510126000  | -4.869257000 | 3.281222000 |
| 6 | 1.732222000  | -3.385374000 | 1.739136000 |
| 1 | 2.558079000  | -3.912846000 | 1.266784000 |
| 6 | 1.271623000  | -2.177290000 | 1.207454000 |
| 6 | 1.101908000  | 1.040147000  | 1.768616000 |

|    |              |              |              |
|----|--------------|--------------|--------------|
| 6  | 1.732211000  | 0.952739000  | 3.023646000  |
| 1  | 1.424881000  | 0.167178000  | 3.714939000  |
| 6  | 2.739478000  | 1.828208000  | 3.407592000  |
| 1  | 3.200319000  | 1.729638000  | 4.388078000  |
| 6  | 3.170172000  | 2.819478000  | 2.530641000  |
| 1  | 3.964858000  | 3.503908000  | 2.816790000  |
| 6  | 2.589366000  | 2.914756000  | 1.274083000  |
| 1  | 2.951669000  | 3.670571000  | 0.582400000  |
| 6  | 1.562996000  | 2.040479000  | 0.892856000  |
| 23 | -0.181727000 | -0.185161000 | -1.100608000 |
| 6  | -3.418593000 | -1.963216000 | -0.394672000 |
| 1  | -4.465593000 | -1.773206000 | -0.119258000 |
| 6  | 3.725334000  | -1.371183000 | -0.226769000 |
| 1  | 4.033399000  | -2.396409000 | 0.029798000  |
| 6  | -0.147824000 | 3.596882000  | -0.991801000 |
| 1  | -0.088628000 | 3.823195000  | -2.067322000 |
| 6  | 0.348748000  | 4.793061000  | -0.190821000 |
| 1  | -0.294003000 | 5.656879000  | -0.388777000 |
| 1  | 0.300949000  | 4.594146000  | 0.884018000  |
| 1  | 1.369368000  | 5.093045000  | -0.427474000 |
| 6  | -1.598189000 | 3.303984000  | -0.643129000 |
| 1  | -1.716252000 | 3.010898000  | 0.405647000  |
| 1  | -2.220026000 | 4.190109000  | -0.805493000 |
| 1  | -2.000306000 | 2.503154000  | -1.263430000 |
| 6  | -3.389028000 | -2.648265000 | -1.756601000 |
| 1  | -3.890257000 | -2.072385000 | -2.537921000 |
| 1  | -2.369331000 | -2.837097000 | -2.102366000 |
| 1  | -3.892324000 | -3.618515000 | -1.701348000 |
| 6  | -2.797167000 | -2.821355000 | 0.694959000  |
| 1  | -2.869529000 | -2.350472000 | 1.678457000  |
| 1  | -3.311229000 | -3.786181000 | 0.750936000  |
| 1  | -1.738606000 | -3.028907000 | 0.513522000  |
| 6  | 4.377771000  | -0.985577000 | -1.547985000 |
| 1  | 5.463897000  | -1.098388000 | -1.477553000 |
| 1  | 4.043260000  | -1.591999000 | -2.394198000 |
| 1  | 4.183622000  | 0.059875000  | -1.801034000 |
| 6  | 4.145692000  | -0.456187000 | 0.910169000  |
| 1  | 3.864912000  | 0.585062000  | 0.725816000  |
| 1  | 3.703326000  | -0.751435000 | 1.864750000  |
| 1  | 5.233813000  | -0.483707000 | 1.026508000  |
| 5  | -0.125509000 | 0.052633000  | 1.509234000  |
| 7  | -0.152641000 | -1.170440000 | -3.976155000 |
| 7  | -0.243888000 | -0.671104000 | -2.827665000 |
| 1  | -1.066287000 | -1.216584000 | -4.456346000 |
| 15 | 0.887514000  | 2.051071000  | -0.798647000 |
| 15 | -2.653106000 | -0.262746000 | -0.474362000 |

|    |              |              |              |
|----|--------------|--------------|--------------|
| 15 | 1.880149000  | -1.537970000 | -0.391902000 |
| 6  | 2.384090000  | 2.280199000  | -1.915520000 |
| 1  | 3.188794000  | 1.811025000  | -1.330951000 |
| 6  | 2.788484000  | 3.719984000  | -2.213262000 |
| 1  | 3.644070000  | 3.719332000  | -2.895747000 |
| 1  | 1.992082000  | 4.282631000  | -2.709499000 |
| 1  | 3.093516000  | 4.282726000  | -1.330358000 |
| 6  | 2.218176000  | 1.506810000  | -3.218896000 |
| 1  | 2.072582000  | 0.435747000  | -3.060358000 |
| 1  | 1.367620000  | 1.872429000  | -3.806859000 |
| 1  | 3.108285000  | 1.627936000  | -3.844237000 |
| 6  | 1.687578000  | -2.952162000 | -1.607180000 |
| 1  | 1.736217000  | -2.443177000 | -2.580863000 |
| 6  | 0.285301000  | -3.525080000 | -1.452977000 |
| 1  | -0.480515000 | -2.744307000 | -1.351723000 |
| 1  | 0.001763000  | -4.123849000 | -2.323896000 |
| 1  | 0.202959000  | -4.155122000 | -0.561614000 |
| 6  | 2.728190000  | -4.062418000 | -1.590400000 |
| 1  | 2.513993000  | -4.772567000 | -2.395932000 |
| 1  | 3.747840000  | -3.705645000 | -1.749401000 |
| 1  | 2.712819000  | -4.635550000 | -0.659727000 |
| 6  | -3.873652000 | 0.710473000  | -1.530417000 |
| 1  | -3.870925000 | 1.700906000  | -1.057682000 |
| 6  | -5.313397000 | 0.203833000  | -1.520112000 |
| 1  | -5.949494000 | 0.924012000  | -2.044026000 |
| 1  | -5.427767000 | -0.750252000 | -2.040205000 |
| 1  | -5.731744000 | 0.082141000  | -0.519388000 |
| 6  | -3.375665000 | 0.855139000  | -2.965028000 |
| 1  | -2.395185000 | 1.337329000  | -3.024358000 |
| 1  | -3.293162000 | -0.113672000 | -3.468189000 |
| 1  | -4.073190000 | 1.461178000  | -3.551293000 |
| 1  | -0.298990000 | 0.527353000  | -2.693474000 |

**TS3<sub>alt</sub>** (Quintet, TE= -3507.061569)

|   |              |              |             |
|---|--------------|--------------|-------------|
| 6 | -1.413468000 | 0.677822000  | 1.933855000 |
| 6 | -1.477271000 | 1.440917000  | 3.114398000 |
| 1 | -0.552875000 | 1.685727000  | 3.635628000 |
| 6 | -2.678908000 | 1.898183000  | 3.642334000 |
| 1 | -2.680418000 | 2.485515000  | 4.557905000 |
| 6 | -3.872429000 | 1.614778000  | 2.990042000 |
| 1 | -4.819387000 | 1.974152000  | 3.385244000 |
| 6 | -3.843858000 | 0.883273000  | 1.809563000 |
| 1 | -4.779365000 | 0.697402000  | 1.290262000 |
| 6 | -2.636595000 | 0.415329000  | 1.279938000 |
| 6 | 0.452440000  | -1.333770000 | 1.947085000 |
| 6 | 0.024249000  | -1.798104000 | 3.201985000 |

|    |              |              |              |
|----|--------------|--------------|--------------|
| 1  | -0.712259000 | -1.216173000 | 3.756218000  |
| 6  | 0.518674000  | -2.969947000 | 3.763119000  |
| 1  | 0.161853000  | -3.298176000 | 4.736972000  |
| 6  | 1.472160000  | -3.718804000 | 3.081580000  |
| 1  | 1.869308000  | -4.633394000 | 3.514859000  |
| 6  | 1.906566000  | -3.294357000 | 1.831149000  |
| 1  | 2.643890000  | -3.890096000 | 1.298141000  |
| 6  | 1.398860000  | -2.125111000 | 1.257017000  |
| 6  | 1.205388000  | 1.202857000  | 1.661742000  |
| 6  | 1.929679000  | 1.183320000  | 2.867387000  |
| 1  | 1.731158000  | 0.391959000  | 3.590418000  |
| 6  | 2.898423000  | 2.132757000  | 3.163288000  |
| 1  | 3.436977000  | 2.084280000  | 4.107252000  |
| 6  | 3.190657000  | 3.134114000  | 2.242704000  |
| 1  | 3.955437000  | 3.876574000  | 2.456967000  |
| 6  | 2.506709000  | 3.169935000  | 1.035412000  |
| 1  | 2.759969000  | 3.940586000  | 0.313611000  |
| 6  | 1.517810000  | 2.222481000  | 0.741587000  |
| 23 | -0.187305000 | -0.197944000 | -1.212939000 |
| 6  | -3.209405000 | -2.147820000 | -0.056578000 |
| 1  | -4.234853000 | -2.012195000 | 0.313762000  |
| 6  | 3.667008000  | -1.260950000 | -0.426419000 |
| 1  | 4.110537000  | -2.228473000 | -0.150917000 |
| 6  | -0.443606000 | 3.587920000  | -1.079466000 |
| 1  | -0.377723000 | 3.831813000  | -2.150284000 |
| 6  | -0.045383000 | 4.805900000  | -0.258435000 |
| 1  | -0.744927000 | 5.626263000  | -0.448652000 |
| 1  | -0.083668000 | 4.588830000  | 0.813772000  |
| 1  | 0.955318000  | 5.177398000  | -0.483945000 |
| 6  | -1.877383000 | 3.184449000  | -0.780416000 |
| 1  | -2.009528000 | 2.895712000  | 0.266827000  |
| 1  | -2.561512000 | 4.015874000  | -0.979309000 |
| 1  | -2.185473000 | 2.343186000  | -1.403784000 |
| 6  | -3.257611000 | -2.937128000 | -1.359338000 |
| 1  | -3.883148000 | -2.470830000 | -2.123866000 |
| 1  | -2.264673000 | -3.065794000 | -1.797049000 |
| 1  | -3.660686000 | -3.938981000 | -1.180545000 |
| 6  | -2.415921000 | -2.870512000 | 1.018630000  |
| 1  | -2.433471000 | -2.335372000 | 1.971343000  |
| 1  | -2.836722000 | -3.866594000 | 1.190213000  |
| 1  | -1.366313000 | -3.003984000 | 0.742357000  |
| 6  | 4.147678000  | -0.874639000 | -1.819432000 |
| 1  | 5.240855000  | -0.831784000 | -1.848596000 |
| 1  | 3.830914000  | -1.570982000 | -2.601252000 |
| 1  | 3.782359000  | 0.117124000  | -2.101192000 |
| 6  | 4.093687000  | -0.244952000 | 0.617253000  |

|    |              |              |              |
|----|--------------|--------------|--------------|
| 1  | 3.709002000  | 0.756056000  | 0.402347000  |
| 1  | 3.760702000  | -0.517298000 | 1.621471000  |
| 1  | 5.186161000  | -0.174905000 | 0.638963000  |
| 5  | 0.028806000  | 0.138577000  | 1.526462000  |
| 7  | -0.718149000 | -1.557222000 | -3.967907000 |
| 7  | -0.456686000 | -1.031285000 | -2.912675000 |
| 1  | -0.704425000 | -0.963984000 | -4.815929000 |
| 15 | 0.713869000  | 2.129057000  | -0.891007000 |
| 15 | -2.583151000 | -0.412641000 | -0.347790000 |
| 15 | 1.837463000  | -1.620007000 | -0.441064000 |
| 6  | 2.093089000  | 2.456237000  | -2.130387000 |
| 1  | 2.970009000  | 2.005964000  | -1.642555000 |
| 6  | 2.409602000  | 3.917427000  | -2.431634000 |
| 1  | 3.230362000  | 3.970125000  | -3.154089000 |
| 1  | 1.561702000  | 4.440325000  | -2.883611000 |
| 1  | 2.723710000  | 4.490876000  | -1.559277000 |
| 6  | 1.830163000  | 1.713807000  | -3.437528000 |
| 1  | 1.735760000  | 0.632096000  | -3.299661000 |
| 1  | 0.914578000  | 2.066928000  | -3.926386000 |
| 1  | 2.652325000  | 1.880210000  | -4.141107000 |
| 6  | 1.771717000  | -3.160118000 | -1.525921000 |
| 1  | 1.707064000  | -2.726532000 | -2.535443000 |
| 6  | 0.487993000  | -3.934856000 | -1.270340000 |
| 1  | -0.393314000 | -3.291337000 | -1.288235000 |
| 1  | 0.343830000  | -4.704953000 | -2.034323000 |
| 1  | 0.505828000  | -4.434350000 | -0.296483000 |
| 6  | 2.972485000  | -4.099064000 | -1.504870000 |
| 1  | 2.807320000  | -4.904275000 | -2.228252000 |
| 1  | 3.913417000  | -3.618980000 | -1.779044000 |
| 1  | 3.113511000  | -4.581923000 | -0.534614000 |
| 6  | -3.990667000 | 0.373903000  | -1.332623000 |
| 1  | -4.022641000 | 1.397663000  | -0.937361000 |
| 6  | -5.374215000 | -0.242827000 | -1.131783000 |
| 1  | -6.122850000 | 0.394736000  | -1.612532000 |
| 1  | -5.461212000 | -1.228791000 | -1.594604000 |
| 1  | -5.671853000 | -0.349349000 | -0.087448000 |
| 6  | -3.677998000 | 0.444832000  | -2.823676000 |
| 1  | -2.760639000 | 1.001515000  | -3.033803000 |
| 1  | -3.565907000 | -0.550787000 | -3.265593000 |
| 1  | -4.494099000 | 0.941312000  | -3.358048000 |
| 1  | -0.746720000 | 0.549637000  | -2.686799000 |

For catalyst [ $4f'_{SB}$ ]

[ $4f'_{SB} - V - H$ ]<sup>+</sup> (TE= -3322.247307)

|   |             |              |              |
|---|-------------|--------------|--------------|
| 6 | 1.673732000 | -0.944371000 | -1.003607000 |
|---|-------------|--------------|--------------|



|    |              |              |              |
|----|--------------|--------------|--------------|
| 6  | 2.635884000  | -0.960215000 | -2.022608000 |
| 1  | 2.550592000  | -0.258885000 | -2.852695000 |
| 6  | 3.676565000  | -1.883629000 | -2.010466000 |
| 1  | 4.405973000  | -1.888455000 | -2.816616000 |
| 6  | 3.782536000  | -2.808225000 | -0.973150000 |
| 1  | 4.594029000  | -3.531259000 | -0.966416000 |
| 6  | 2.873174000  | -2.782736000 | 0.078080000  |
| 1  | 2.988908000  | -3.457393000 | 0.923520000  |
| 6  | 1.834482000  | -1.855054000 | 0.048859000  |
| 6  | -0.893855000 | -0.944308000 | -1.665299000 |
| 6  | -0.706467000 | -1.727545000 | -2.817912000 |
| 1  | 0.301555000  | -1.852615000 | -3.211453000 |
| 6  | -1.772156000 | -2.312210000 | -3.489483000 |
| 1  | -1.594095000 | -2.891516000 | -4.391789000 |
| 6  | -3.066583000 | -2.162538000 | -2.999453000 |
| 1  | -3.906032000 | -2.624947000 | -3.512353000 |
| 6  | -3.282681000 | -1.459179000 | -1.821068000 |
| 1  | -4.282557000 | -1.407200000 | -1.395795000 |
| 6  | -2.208695000 | -0.852531000 | -1.171298000 |
| 6  | 0.229763000  | 1.439761000  | -1.137062000 |
| 6  | -0.566256000 | 1.927842000  | -2.206143000 |
| 1  | -1.170416000 | 1.221828000  | -2.769152000 |
| 6  | -0.552828000 | 3.252597000  | -2.608207000 |
| 1  | -1.151663000 | 3.564483000  | -3.459984000 |
| 6  | 0.215064000  | 4.179434000  | -1.910977000 |
| 1  | 0.223610000  | 5.225031000  | -2.208258000 |
| 6  | 0.947918000  | 3.770127000  | -0.806574000 |
| 1  | 1.494975000  | 4.497717000  | -0.213051000 |
| 6  | 0.977084000  | 2.426680000  | -0.429864000 |
| 16 | 1.729769000  | 2.078160000  | 1.158516000  |
| 16 | 0.788637000  | -1.583778000 | 1.465421000  |
| 16 | -2.461787000 | -0.201300000 | 0.472316000  |
| 23 | -0.357756000 | 0.754904000  | 1.329188000  |
| 6  | -0.139401000 | -3.181568000 | 1.734900000  |
| 1  | 0.655031000  | -3.873945000 | 2.039111000  |
| 6  | -3.860292000 | 1.023315000  | 0.326724000  |
| 1  | -4.692872000 | 0.408296000  | -0.035964000 |
| 6  | 3.588740000  | 1.757786000  | 0.913636000  |
| 1  | 3.977873000  | 2.498065000  | 1.620855000  |
| 6  | 4.012071000  | 2.120183000  | -0.488830000 |
| 1  | 5.098549000  | 2.012202000  | -0.569543000 |
| 1  | 3.560772000  | 1.454223000  | -1.229355000 |
| 1  | 3.763805000  | 3.149822000  | -0.754912000 |
| 6  | 4.019923000  | 0.376954000  | 1.343852000  |
| 1  | 3.808869000  | -0.370523000 | 0.580288000  |
| 1  | 5.103730000  | 0.382708000  | 1.502093000  |

|   |              |              |              |
|---|--------------|--------------|--------------|
| 1 | 3.558178000  | 0.059398000  | 2.282071000  |
| 6 | -1.085990000 | -2.943888000 | 2.893693000  |
| 1 | -0.568752000 | -2.606097000 | 3.794869000  |
| 1 | -1.849351000 | -2.201586000 | 2.640223000  |
| 1 | -1.603749000 | -3.875629000 | 3.138277000  |
| 6 | -0.824560000 | -3.688872000 | 0.487987000  |
| 1 | -0.147858000 | -3.748769000 | -0.368647000 |
| 1 | -1.209307000 | -4.696880000 | 0.674759000  |
| 1 | -1.673957000 | -3.060495000 | 0.210957000  |
| 6 | -4.151565000 | 1.513018000  | 1.730649000  |
| 1 | -5.037116000 | 2.154486000  | 1.714276000  |
| 1 | -4.344778000 | 0.694488000  | 2.428602000  |
| 1 | -3.317428000 | 2.104745000  | 2.117299000  |
| 6 | -3.549463000 | 2.134261000  | -0.646023000 |
| 1 | -2.679551000 | 2.709678000  | -0.314847000 |
| 1 | -3.356664000 | 1.758645000  | -1.654553000 |
| 1 | -4.403053000 | 2.817455000  | -0.707221000 |
| 5 | 0.338256000  | -0.133128000 | -1.124625000 |
| 7 | -1.270494000 | 0.562268000  | 4.186775000  |
| 7 | -0.810142000 | 0.651847000  | 3.073702000  |
| 1 | -0.658303000 | 0.980290000  | 4.919330000  |
| 1 | -1.080149000 | 2.276840000  | 1.432373000  |

**TS3<sub>alt</sub>** (Triplet, TE= -3322.220150)

|   |              |              |              |
|---|--------------|--------------|--------------|
| 6 | 0.017590000  | 1.382372000  | -1.211685000 |
| 6 | -0.898065000 | 1.857957000  | -2.186759000 |
| 1 | -1.582897000 | 1.147766000  | -2.643247000 |
| 6 | -0.911970000 | 3.168220000  | -2.632194000 |
| 1 | -1.600906000 | 3.462787000  | -3.419832000 |
| 6 | -0.054965000 | 4.106795000  | -2.062187000 |
| 1 | -0.068516000 | 5.141762000  | -2.394205000 |
| 6 | 0.802256000  | 3.718065000  | -1.045727000 |
| 1 | 1.440170000  | 4.449020000  | -0.555148000 |
| 6 | 0.864011000  | 2.380145000  | -0.638032000 |
| 6 | 1.396732000  | -1.030959000 | -1.245974000 |
| 6 | 2.014100000  | -1.226456000 | -2.490917000 |
| 1 | 1.622172000  | -0.713771000 | -3.369276000 |
| 6 | 3.126659000  | -2.048874000 | -2.626727000 |
| 1 | 3.583435000  | -2.184215000 | -3.604113000 |
| 6 | 3.669531000  | -2.685214000 | -1.512444000 |
| 1 | 4.547685000  | -3.317381000 | -1.614472000 |
| 6 | 3.096425000  | -2.493899000 | -0.261017000 |
| 1 | 3.527164000  | -2.961498000 | 0.622067000  |
| 6 | 1.963981000  | -1.686935000 | -0.148649000 |
| 6 | -1.273921000 | -0.975871000 | -1.452327000 |

|    |              |              |              |
|----|--------------|--------------|--------------|
| 6  | -1.310740000 | -1.799653000 | -2.591020000 |
| 1  | -0.399138000 | -1.943987000 | -3.167628000 |
| 6  | -2.475768000 | -2.424887000 | -3.015460000 |
| 1  | -2.465970000 | -3.037332000 | -3.913656000 |
| 6  | -3.645983000 | -2.290107000 | -2.275057000 |
| 1  | -4.554991000 | -2.801744000 | -2.580595000 |
| 6  | -3.635510000 | -1.541300000 | -1.105442000 |
| 1  | -4.517872000 | -1.514058000 | -0.473299000 |
| 6  | -2.472467000 | -0.872271000 | -0.720312000 |
| 16 | -2.397685000 | -0.154051000 | 0.920415000  |
| 16 | 1.875374000  | 2.032748000  | 0.796243000  |
| 16 | 1.251684000  | -1.385954000 | 1.466233000  |
| 23 | -0.108777000 | 0.683656000  | 1.256308000  |
| 6  | 3.681430000  | 1.802887000  | 0.277085000  |
| 1  | 4.017190000  | 2.845799000  | 0.298754000  |
| 6  | 0.389480000  | -2.988308000 | 1.897135000  |
| 1  | 1.230968000  | -3.669710000 | 2.072756000  |
| 6  | -3.619437000 | 1.264579000  | 1.017801000  |
| 1  | -3.390040000 | 1.614936000  | 2.032470000  |
| 6  | -5.050274000 | 0.770928000  | 0.961260000  |
| 1  | -5.720990000 | 1.583040000  | 1.258199000  |
| 1  | -5.336847000 | 0.481245000  | -0.052895000 |
| 1  | -5.233796000 | -0.072209000 | 1.630712000  |
| 6  | -3.338956000 | 2.354776000  | 0.010982000  |
| 1  | -3.451074000 | 1.987054000  | -1.013593000 |
| 1  | -4.060402000 | 3.167537000  | 0.143758000  |
| 1  | -2.337714000 | 2.781979000  | 0.112333000  |
| 6  | 4.342459000  | 1.018494000  | 1.388996000  |
| 1  | 4.168234000  | 1.453252000  | 2.376316000  |
| 1  | 3.994264000  | -0.018556000 | 1.403753000  |
| 1  | 5.424077000  | 1.002338000  | 1.223625000  |
| 6  | 3.895483000  | 1.218316000  | -1.093428000 |
| 1  | 3.241064000  | 1.654294000  | -1.853260000 |
| 1  | 4.926817000  | 1.424298000  | -1.399254000 |
| 1  | 3.764336000  | 0.137212000  | -1.097794000 |
| 6  | -0.357582000 | -2.740265000 | 3.191408000  |
| 1  | -0.796189000 | -3.676513000 | 3.547990000  |
| 1  | 0.290402000  | -2.353906000 | 3.982107000  |
| 1  | -1.179153000 | -2.031363000 | 3.040989000  |
| 6  | -0.489351000 | -3.514371000 | 0.788085000  |
| 1  | -1.377201000 | -2.892551000 | 0.649441000  |
| 1  | 0.033219000  | -3.582861000 | -0.169644000 |
| 1  | -0.833183000 | -4.521061000 | 1.047140000  |
| 5  | 0.062758000  | -0.203846000 | -1.114162000 |
| 7  | -0.189083000 | 1.047670000  | 4.271559000  |
| 7  | -0.272176000 | 0.910962000  | 3.037374000  |

|   |              |             |             |
|---|--------------|-------------|-------------|
| 1 | -0.819406000 | 0.407426000 | 4.776913000 |
| 1 | -0.688890000 | 1.906853000 | 2.385186000 |

**TS3<sub>alt</sub>** (Quintet, TE= -3322.210412)

|    |              |              |              |
|----|--------------|--------------|--------------|
| 6  | 1.308232000  | 0.094886000  | -1.737583000 |
| 6  | 1.798760000  | 0.841728000  | -2.822130000 |
| 1  | 1.180937000  | 1.635618000  | -3.242406000 |
| 6  | 3.043832000  | 0.581171000  | -3.383669000 |
| 1  | 3.388353000  | 1.166290000  | -4.232663000 |
| 6  | 3.855972000  | -0.412137000 | -2.845085000 |
| 1  | 4.838374000  | -0.608305000 | -3.266693000 |
| 6  | 3.424432000  | -1.128826000 | -1.735339000 |
| 1  | 4.075882000  | -1.865179000 | -1.269808000 |
| 6  | 2.157955000  | -0.885282000 | -1.203213000 |
| 6  | -1.288197000 | -0.667636000 | -1.659417000 |
| 6  | -1.392341000 | -1.062730000 | -3.003067000 |
| 1  | -0.621046000 | -0.752548000 | -3.708349000 |
| 6  | -2.463601000 | -1.822795000 | -3.458076000 |
| 1  | -2.524953000 | -2.100440000 | -4.507338000 |
| 6  | -3.445547000 | -2.243757000 | -2.566273000 |
| 1  | -4.276288000 | -2.854059000 | -2.911068000 |
| 6  | -3.342553000 | -1.916345000 | -1.219235000 |
| 1  | -4.074284000 | -2.292466000 | -0.507483000 |
| 6  | -2.282319000 | -1.123471000 | -0.781086000 |
| 6  | -0.605870000 | 1.834301000  | -0.964310000 |
| 6  | -1.456643000 | 2.478187000  | -1.875825000 |
| 1  | -1.858044000 | 1.912505000  | -2.716792000 |
| 6  | -1.806402000 | 3.816722000  | -1.729622000 |
| 1  | -2.462949000 | 4.287705000  | -2.457086000 |
| 6  | -1.338673000 | 4.541748000  | -0.639684000 |
| 1  | -1.625006000 | 5.581686000  | -0.505676000 |
| 6  | -0.516229000 | 3.924263000  | 0.297724000  |
| 1  | -0.170064000 | 4.469996000  | 1.172478000  |
| 6  | -0.140354000 | 2.593435000  | 0.120299000  |
| 16 | 0.828139000  | 1.831175000  | 1.424376000  |
| 16 | 1.724483000  | -1.703022000 | 0.325432000  |
| 16 | -2.087346000 | -0.860565000 | 0.977234000  |
| 23 | 0.173855000  | -0.531489000 | 1.931976000  |
| 6  | 1.363608000  | -3.482418000 | -0.129937000 |
| 1  | 2.354730000  | -3.877914000 | -0.381597000 |
| 6  | -3.512108000 | 0.248662000  | 1.476804000  |
| 1  | -4.381113000 | -0.414990000 | 1.399081000  |
| 6  | 2.606087000  | 2.032251000  | 0.862837000  |
| 1  | 2.683205000  | 1.493917000  | -0.085892000 |
| 6  | 3.474397000  | 1.372077000  | 1.914229000  |

|   |              |              |              |
|---|--------------|--------------|--------------|
| 1 | 4.525687000  | 1.453820000  | 1.622618000  |
| 1 | 3.367879000  | 1.855097000  | 2.890545000  |
| 1 | 3.253304000  | 0.306807000  | 2.033181000  |
| 6 | 2.916049000  | 3.497490000  | 0.658941000  |
| 1 | 2.795488000  | 4.070238000  | 1.583496000  |
| 1 | 3.955143000  | 3.608077000  | 0.333175000  |
| 1 | 2.285051000  | 3.951290000  | -0.109188000 |
| 6 | 0.839441000  | -4.150953000 | 1.124234000  |
| 1 | 1.511626000  | -4.037267000 | 1.978296000  |
| 1 | -0.142066000 | -3.752552000 | 1.405961000  |
| 1 | 0.714221000  | -5.222070000 | 0.941684000  |
| 6 | 0.429469000  | -3.613430000 | -1.307899000 |
| 1 | 0.767241000  | -3.044694000 | -2.178223000 |
| 1 | 0.371047000  | -4.665635000 | -1.605616000 |
| 1 | -0.581758000 | -3.284291000 | -1.056120000 |
| 6 | -3.279057000 | 0.629878000  | 2.923278000  |
| 1 | -4.147395000 | 1.176381000  | 3.302150000  |
| 1 | -3.125928000 | -0.238755000 | 3.569477000  |
| 1 | -2.406974000 | 1.285164000  | 3.023168000  |
| 6 | -3.676655000 | 1.442575000  | 0.568166000  |
| 1 | -2.844303000 | 2.143539000  | 0.672030000  |
| 1 | -3.757620000 | 1.161164000  | -0.484884000 |
| 1 | -4.594443000 | 1.976076000  | 0.837224000  |
| 5 | -0.170727000 | 0.366071000  | -1.295895000 |
| 7 | 0.806071000  | -2.110071000 | 4.536590000  |
| 7 | 0.600599000  | -1.491008000 | 3.517869000  |
| 1 | 1.104532000  | -1.590107000 | 5.376633000  |
| 1 | -0.046301000 | -0.039413000 | 3.631184000  |

Cartesian coordinates of intermediates and TSs involved in the conversion of [4]→[5]<sub>dis</sub> for the catalysts [**1c''<sub>PB</sub>**] and [**1f''<sub>SB</sub>**], along with their total energies (in hartree) including zero point vibrational correction at M06-L-D3(heptane)/6-311+G\* level of theory.

For catalyst [**1c''<sub>PB</sub>**]

[**4c''<sub>PB</sub>** -V-H]<sup>+</sup> (TE= -3507.088650)

|   |             |              |             |
|---|-------------|--------------|-------------|
| 6 | 1.567069000 | -0.653872000 | 1.844241000 |
| 6 | 1.848572000 | -1.579368000 | 2.866937000 |
| 1 | 1.023541000 | -2.119171000 | 3.330452000 |
| 6 | 3.141170000 | -1.809021000 | 3.324580000 |
| 1 | 3.316074000 | -2.522805000 | 4.125823000 |
| 6 | 4.203390000 | -1.129002000 | 2.744624000 |
| 1 | 5.220822000 | -1.297200000 | 3.089153000 |
| 6 | 3.963603000 | -0.250426000 | 1.692119000 |
| 1 | 4.811676000 | 0.233638000  | 1.215202000 |
| 6 | 2.669712000 | -0.004616000 | 1.228848000 |

|    |              |              |              |
|----|--------------|--------------|--------------|
| 6  | -0.576924000 | 1.060156000  | 1.918802000  |
| 6  | -0.131889000 | 1.541101000  | 3.166861000  |
| 1  | 0.763534000  | 1.112153000  | 3.614003000  |
| 6  | -0.834588000 | 2.512723000  | 3.873995000  |
| 1  | -0.473760000 | 2.840141000  | 4.845920000  |
| 6  | -1.988618000 | 3.059743000  | 3.332597000  |
| 1  | -2.549449000 | 3.814146000  | 3.878767000  |
| 6  | -2.410833000 | 2.658485000  | 2.066212000  |
| 1  | -3.289987000 | 3.128605000  | 1.628802000  |
| 6  | -1.725689000 | 1.679787000  | 1.351369000  |
| 6  | -0.976574000 | -1.561202000 | 1.655962000  |
| 6  | -1.741231000 | -1.740741000 | 2.820049000  |
| 1  | -1.659614000 | -1.014173000 | 3.629224000  |
| 6  | -2.604487000 | -2.819652000 | 2.962709000  |
| 1  | -3.180294000 | -2.939246000 | 3.877402000  |
| 6  | -2.749559000 | -3.728047000 | 1.919849000  |
| 1  | -3.439654000 | -4.563256000 | 2.010443000  |
| 6  | -2.024114000 | -3.553966000 | 0.747387000  |
| 1  | -2.181472000 | -4.250029000 | -0.072104000 |
| 6  | -1.126301000 | -2.490326000 | 0.609116000  |
| 23 | 0.091819000  | 0.499402000  | -1.169572000 |
| 6  | 2.821207000  | 2.708411000  | 0.048189000  |
| 1  | 3.890290000  | 2.707809000  | 0.301538000  |
| 6  | -3.851486000 | 0.629362000  | -0.430268000 |
| 1  | -4.515629000 | 1.460855000  | -0.163390000 |
| 6  | 1.146124000  | -3.426724000 | -1.059748000 |
| 1  | 1.004479000  | -3.888123000 | -2.044349000 |
| 6  | 1.049743000  | -4.512202000 | 0.002343000  |
| 1  | 1.854317000  | -5.241244000 | -0.138893000 |
| 1  | 1.157092000  | -4.097935000 | 1.010533000  |
| 1  | 0.105653000  | -5.060828000 | -0.022446000 |
| 6  | 2.519759000  | -2.780745000 | -1.053344000 |
| 1  | 2.741160000  | -2.300874000 | -0.095449000 |
| 1  | 3.296016000  | -3.534171000 | -1.223657000 |
| 1  | 2.614035000  | -2.031768000 | -1.841904000 |
| 6  | 2.601591000  | 3.573589000  | -1.187659000 |
| 1  | 3.157481000  | 3.225955000  | -2.063043000 |
| 1  | 1.543025000  | 3.598770000  | -1.462460000 |
| 1  | 2.918598000  | 4.602814000  | -0.992176000 |
| 6  | 2.053116000  | 3.244996000  | 1.243462000  |
| 1  | 2.242312000  | 2.665553000  | 2.151248000  |
| 1  | 2.352040000  | 4.278918000  | 1.444547000  |
| 1  | 0.973920000  | 3.243349000  | 1.065460000  |
| 6  | -4.173513000 | 0.167813000  | -1.847917000 |
| 1  | -5.235222000 | -0.079652000 | -1.945248000 |
| 1  | -3.940395000 | 0.911707000  | -2.616139000 |

|    |              |              |              |
|----|--------------|--------------|--------------|
| 1  | -3.607357000 | -0.734690000 | -2.098307000 |
| 6  | -4.075479000 | -0.483535000 | 0.576682000  |
| 1  | -3.477026000 | -1.368590000 | 0.348463000  |
| 1  | -3.840122000 | -0.177647000 | 1.599275000  |
| 1  | -5.125542000 | -0.794153000 | 0.559475000  |
| 5  | 0.035211000  | -0.360157000 | 1.647274000  |
| 15 | 2.419334000  | 0.929495000  | -0.337537000 |
| 15 | -2.130903000 | 1.354476000  | -0.406483000 |
| 15 | -0.239822000 | -2.147204000 | -0.958915000 |
| 6  | -2.405725000 | 3.042994000  | -1.233463000 |
| 1  | -2.052184000 | 2.839742000  | -2.254298000 |
| 6  | -1.546149000 | 4.167583000  | -0.663788000 |
| 1  | -1.546334000 | 5.010700000  | -1.361720000 |
| 1  | -1.941692000 | 4.540229000  | 0.285042000  |
| 1  | -0.508968000 | 3.874875000  | -0.501058000 |
| 6  | -3.851048000 | 3.524960000  | -1.318204000 |
| 1  | -3.875796000 | 4.477068000  | -1.857686000 |
| 1  | -4.520072000 | 2.845914000  | -1.848398000 |
| 1  | -4.284838000 | 3.718845000  | -0.331414000 |
| 6  | 3.862543000  | 0.395867000  | -1.434986000 |
| 1  | 4.076940000  | -0.622492000 | -1.089088000 |
| 6  | 5.147204000  | 1.210446000  | -1.314421000 |
| 1  | 5.930674000  | 0.738344000  | -1.915974000 |
| 1  | 5.032664000  | 2.229144000  | -1.694122000 |
| 1  | 5.533804000  | 1.284956000  | -0.296090000 |
| 6  | 3.430989000  | 0.327183000  | -2.897271000 |
| 1  | 4.228203000  | -0.106686000 | -3.509277000 |
| 1  | 2.528723000  | -0.273638000 | -3.046838000 |
| 1  | 3.227490000  | 1.324784000  | -3.300972000 |
| 6  | -1.453458000 | -2.711556000 | -2.283181000 |
| 1  | -2.429362000 | -2.501687000 | -1.822131000 |
| 6  | -1.311615000 | -1.863063000 | -3.542116000 |
| 1  | -0.293956000 | -1.912695000 | -3.949902000 |
| 1  | -1.984668000 | -2.226609000 | -4.325421000 |
| 1  | -1.544503000 | -0.809482000 | -3.372677000 |
| 6  | -1.398808000 | -4.192240000 | -2.650887000 |
| 1  | -0.556953000 | -4.411323000 | -3.314126000 |
| 1  | -1.321239000 | -4.868864000 | -1.797316000 |
| 1  | -2.304127000 | -4.466280000 | -3.201579000 |
| 7  | 0.056136000  | 1.556589000  | -3.966332000 |
| 7  | 0.172754000  | 1.107357000  | -2.834684000 |
| 1  | 0.979160000  | 1.746285000  | -4.409277000 |
| 1  | 0.131002000  | 2.086074000  | -0.695003000 |

**TS4'**<sub>dis</sub> (TE= -3507.062932)

|   |              |             |             |
|---|--------------|-------------|-------------|
| 6 | -1.434249000 | 0.766987000 | 1.905348000 |
|---|--------------|-------------|-------------|

|    |              |              |              |
|----|--------------|--------------|--------------|
| 6  | -1.562983000 | 1.603913000  | 3.030452000  |
| 1  | -0.665377000 | 1.923850000  | 3.558362000  |
| 6  | -2.799001000 | 2.031561000  | 3.499433000  |
| 1  | -2.856208000 | 2.670692000  | 4.377330000  |
| 6  | -3.952364000 | 1.654659000  | 2.825598000  |
| 1  | -4.928140000 | 1.990531000  | 3.167891000  |
| 6  | -3.851958000 | 0.862541000  | 1.687810000  |
| 1  | -4.762865000 | 0.614593000  | 1.153348000  |
| 6  | -2.615443000 | 0.407251000  | 1.219106000  |
| 6  | 0.465045000  | -1.201447000 | 2.051936000  |
| 6  | 0.042711000  | -1.625471000 | 3.323036000  |
| 1  | -0.685334000 | -1.024100000 | 3.867273000  |
| 6  | 0.530554000  | -2.787477000 | 3.910670000  |
| 1  | 0.180823000  | -3.085257000 | 4.896378000  |
| 6  | 1.457736000  | -3.567699000 | 3.231579000  |
| 1  | 1.845092000  | -4.479518000 | 3.679140000  |
| 6  | 1.879867000  | -3.182148000 | 1.963600000  |
| 1  | 2.595591000  | -3.806666000 | 1.436050000  |
| 6  | 1.393623000  | -2.016688000 | 1.365615000  |
| 6  | 1.177499000  | 1.352270000  | 1.681001000  |
| 6  | 1.925523000  | 1.437625000  | 2.868064000  |
| 1  | 1.764752000  | 0.698035000  | 3.653066000  |
| 6  | 2.872708000  | 2.434216000  | 3.065779000  |
| 1  | 3.431225000  | 2.475654000  | 3.998044000  |
| 6  | 3.122127000  | 3.360486000  | 2.058699000  |
| 1  | 3.875336000  | 4.132696000  | 2.194461000  |
| 6  | 2.414112000  | 3.282732000  | 0.866108000  |
| 1  | 2.638655000  | 3.992770000  | 0.073924000  |
| 6  | 1.435179000  | 2.300973000  | 0.673696000  |
| 23 | -0.175058000 | -0.236180000 | -1.457444000 |
| 6  | -3.113939000 | -2.226168000 | 0.045664000  |
| 1  | -4.131954000 | -2.060020000 | 0.422152000  |
| 6  | 3.676635000  | -1.196259000 | -0.280997000 |
| 1  | 4.107668000  | -2.150443000 | 0.054071000  |
| 6  | -0.550050000 | 3.528817000  | -1.180200000 |
| 1  | -0.594017000 | 3.624956000  | -2.275190000 |
| 6  | -0.070181000 | 4.835892000  | -0.565790000 |
| 1  | -0.788882000 | 5.630716000  | -0.789391000 |
| 1  | -0.004401000 | 4.760414000  | 0.524101000  |
| 1  | 0.900001000  | 5.169150000  | -0.934891000 |
| 6  | -1.946035000 | 3.197798000  | -0.679462000 |
| 1  | -1.969689000 | 3.083017000  | 0.408448000  |
| 1  | -2.642181000 | 4.002335000  | -0.937416000 |
| 1  | -2.317799000 | 2.277201000  | -1.130178000 |
| 6  | -3.195346000 | -3.106583000 | -1.195903000 |
| 1  | -2.205946000 | -3.384977000 | -1.563242000 |



|    |              |              |              |
|----|--------------|--------------|--------------|
| 1  | -3.724777000 | -4.036106000 | -0.962853000 |
| 1  | -3.715651000 | -2.634053000 | -2.031500000 |
| 6  | -2.315479000 | -2.885970000 | 1.156418000  |
| 1  | -2.334524000 | -2.300871000 | 2.079255000  |
| 1  | -2.732980000 | -3.872605000 | 1.383523000  |
| 1  | -1.265768000 | -3.033534000 | 0.886091000  |
| 6  | 4.222226000  | -0.865249000 | -1.664602000 |
| 1  | 5.316452000  | -0.881619000 | -1.654224000 |
| 1  | 3.896146000  | -1.557137000 | -2.446715000 |
| 1  | 3.923762000  | 0.139551000  | -1.975507000 |
| 6  | 4.061397000  | -0.139259000 | 0.737883000  |
| 1  | 3.680264000  | 0.850930000  | 0.472378000  |
| 1  | 3.698150000  | -0.377378000 | 1.740283000  |
| 1  | 5.152106000  | -0.061655000 | 0.792803000  |
| 5  | 0.037107000  | 0.263787000  | 1.665578000  |
| 7  | 0.072545000  | -1.491958000 | -3.744583000 |
| 7  | -0.884938000 | -1.231995000 | -3.035131000 |
| 1  | -0.117955000 | -2.282651000 | -4.406154000 |
| 15 | 0.604129000  | 2.082653000  | -0.941336000 |
| 15 | -2.506448000 | -0.506300000 | -0.372651000 |
| 15 | 1.848688000  | -1.571846000 | -0.349982000 |
| 6  | 2.000679000  | 2.298907000  | -2.184561000 |
| 1  | 2.885340000  | 1.993564000  | -1.606374000 |
| 6  | 2.244043000  | 3.698518000  | -2.731914000 |
| 1  | 3.035736000  | 3.661800000  | -3.487445000 |
| 1  | 1.359571000  | 4.113386000  | -3.224132000 |
| 1  | 2.568134000  | 4.411760000  | -1.972386000 |
| 6  | 1.812204000  | 1.308432000  | -3.327395000 |
| 1  | 1.731401000  | 0.266812000  | -2.982787000 |
| 1  | 0.921514000  | 1.526028000  | -3.923324000 |
| 1  | 2.674279000  | 1.322795000  | -4.003229000 |
| 6  | 1.856624000  | -3.159551000 | -1.371686000 |
| 1  | 1.840508000  | -2.753189000 | -2.394639000 |
| 6  | 0.563669000  | -3.929118000 | -1.158018000 |
| 1  | -0.319608000 | -3.294810000 | -1.266179000 |
| 1  | 0.470248000  | -4.742310000 | -1.884628000 |
| 1  | 0.516301000  | -4.375455000 | -0.159671000 |
| 6  | 3.061980000  | -4.087731000 | -1.274761000 |
| 1  | 2.937907000  | -4.902619000 | -1.995659000 |
| 1  | 4.009760000  | -3.602113000 | -1.512312000 |
| 1  | 3.162856000  | -4.559536000 | -0.294437000 |
| 6  | -3.967780000 | 0.185619000  | -1.369856000 |
| 1  | -4.038615000 | 1.216025000  | -0.998164000 |
| 6  | -5.324395000 | -0.479646000 | -1.132994000 |
| 1  | -6.099261000 | 0.122442000  | -1.618115000 |
| 1  | -5.381924000 | -1.475552000 | -1.578567000 |

|   |              |              |              |
|---|--------------|--------------|--------------|
| 1 | -5.612151000 | -0.578970000 | -0.085126000 |
| 6 | -3.696568000 | 0.244003000  | -2.868115000 |
| 1 | -2.788927000 | 0.800293000  | -3.105149000 |
| 1 | -3.586536000 | -0.753871000 | -3.302410000 |
| 1 | -4.537756000 | 0.728065000  | -3.375067000 |
| 1 | -0.900556000 | 0.959813000  | -2.417904000 |

$\eta_{NN}^2 - [4c''_{PB} - V - H]^+$  (TE= -3507.087648)

|    |              |              |              |
|----|--------------|--------------|--------------|
| 6  | -1.363126000 | 0.819160000  | 1.903240000  |
| 6  | -1.487848000 | 1.684267000  | 3.007056000  |
| 1  | -0.585113000 | 2.059661000  | 3.487458000  |
| 6  | -2.721378000 | 2.075469000  | 3.511892000  |
| 1  | -2.772668000 | 2.738902000  | 4.371906000  |
| 6  | -3.880805000 | 1.630121000  | 2.893740000  |
| 1  | -4.857540000 | 1.934666000  | 3.261556000  |
| 6  | -3.787926000 | 0.806051000  | 1.778339000  |
| 1  | -4.708366000 | 0.503363000  | 1.291820000  |
| 6  | -2.551936000 | 0.384788000  | 1.275458000  |
| 6  | 0.621777000  | -1.054979000 | 2.045137000  |
| 6  | 0.301602000  | -1.418086000 | 3.364399000  |
| 1  | -0.423078000 | -0.821439000 | 3.918638000  |
| 6  | 0.891362000  | -2.511674000 | 3.987943000  |
| 1  | 0.621900000  | -2.764842000 | 5.010654000  |
| 6  | 1.820951000  | -3.278465000 | 3.297008000  |
| 1  | 2.293514000  | -4.134242000 | 3.772677000  |
| 6  | 2.133625000  | -2.955227000 | 1.981164000  |
| 1  | 2.846823000  | -3.575396000 | 1.446042000  |
| 6  | 1.542100000  | -1.861120000 | 1.343070000  |
| 6  | 1.228320000  | 1.498264000  | 1.610489000  |
| 6  | 2.019416000  | 1.665664000  | 2.758192000  |
| 1  | 1.903626000  | 0.974338000  | 3.593571000  |
| 6  | 2.959480000  | 2.684728000  | 2.847863000  |
| 1  | 3.558970000  | 2.792922000  | 3.748832000  |
| 6  | 3.150934000  | 3.550181000  | 1.774742000  |
| 1  | 3.899442000  | 4.336813000  | 1.829960000  |
| 6  | 2.391604000  | 3.393219000  | 0.622071000  |
| 1  | 2.565321000  | 4.056587000  | -0.222066000 |
| 6  | 1.427343000  | 2.383093000  | 0.538061000  |
| 23 | -0.334166000 | -0.289653000 | -1.613944000 |
| 6  | -2.989083000 | -2.328744000 | 0.246903000  |
| 1  | -4.007744000 | -2.214837000 | 0.639281000  |
| 6  | 3.668791000  | -1.057235000 | -0.478836000 |
| 1  | 4.153178000  | -1.968633000 | -0.102190000 |
| 6  | -0.688851000 | 3.462907000  | -1.222902000 |
| 1  | -0.852317000 | 3.457350000  | -2.310831000 |
| 6  | -0.144154000 | 4.817358000  | -0.791494000 |

|    |              |              |              |
|----|--------------|--------------|--------------|
| 1  | -0.878672000 | 5.595791000  | -1.022212000 |
| 1  | 0.027142000  | 4.851043000  | 0.288709000  |
| 1  | 0.786174000  | 5.100831000  | -1.283812000 |
| 6  | -2.025499000 | 3.210206000  | -0.542837000 |
| 1  | -1.930967000 | 3.208363000  | 0.547491000  |
| 1  | -2.736938000 | 3.999602000  | -0.805769000 |
| 1  | -2.458041000 | 2.255934000  | -0.846197000 |
| 6  | -3.031773000 | -3.257952000 | -0.960509000 |
| 1  | -2.036329000 | -3.432731000 | -1.377074000 |
| 1  | -3.434434000 | -4.235240000 | -0.676296000 |
| 1  | -3.656412000 | -2.877490000 | -1.773567000 |
| 6  | -2.125175000 | -2.882409000 | 1.366486000  |
| 1  | -2.152429000 | -2.248274000 | 2.256339000  |
| 1  | -2.482427000 | -3.875571000 | 1.658280000  |
| 1  | -1.077438000 | -2.988762000 | 1.074639000  |
| 6  | 4.139962000  | -0.810755000 | -1.907722000 |
| 1  | 5.233067000  | -0.836424000 | -1.958828000 |
| 1  | 3.766872000  | -1.544527000 | -2.628365000 |
| 1  | 3.833474000  | 0.177031000  | -2.262364000 |
| 6  | 4.072302000  | 0.076458000  | 0.444744000  |
| 1  | 3.657145000  | 1.037809000  | 0.132173000  |
| 1  | 3.761595000  | -0.098499000 | 1.477400000  |
| 1  | 5.162356000  | 0.182286000  | 0.442923000  |
| 5  | 0.121412000  | 0.375545000  | 1.638018000  |
| 7  | -0.280011000 | -2.006054000 | -2.791258000 |
| 7  | -1.074788000 | -1.183402000 | -3.210265000 |
| 15 | 0.477801000  | 2.021150000  | -0.977492000 |
| 15 | -2.496817000 | -0.603338000 | -0.278875000 |
| 15 | 1.855157000  | -1.525807000 | -0.432262000 |
| 6  | 1.758552000  | 2.136092000  | -2.356317000 |
| 1  | 2.687300000  | 1.857951000  | -1.838450000 |
| 6  | 1.967488000  | 3.487398000  | -3.023850000 |
| 1  | 2.682387000  | 3.384889000  | -3.847090000 |
| 1  | 1.044581000  | 3.887458000  | -3.454112000 |
| 1  | 2.374677000  | 4.239834000  | -2.347037000 |
| 6  | 1.466230000  | 1.069625000  | -3.408763000 |
| 1  | 1.470075000  | 0.046956000  | -2.988111000 |
| 1  | 0.517933000  | 1.243229000  | -3.924426000 |
| 1  | 2.251030000  | 1.041893000  | -4.172294000 |
| 6  | 1.946043000  | -3.217400000 | -1.269681000 |
| 1  | 1.772388000  | -2.956380000 | -2.321282000 |
| 6  | 0.783420000  | -4.093731000 | -0.830460000 |
| 1  | -0.160065000 | -3.547766000 | -0.821422000 |
| 1  | 0.663858000  | -4.941074000 | -1.512624000 |
| 1  | 0.933809000  | -4.497716000 | 0.175434000  |
| 6  | 3.254548000  | -4.001258000 | -1.216253000 |

|   |              |              |              |
|---|--------------|--------------|--------------|
| 1 | 3.128717000  | -4.924231000 | -1.792287000 |
| 1 | 4.103439000  | -3.474664000 | -1.655059000 |
| 1 | 3.541782000  | -4.308582000 | -0.207689000 |
| 6 | -4.050189000 | -0.015826000 | -1.203819000 |
| 1 | -4.139941000 | 1.027298000  | -0.873227000 |
| 6 | -5.354887000 | -0.734023000 | -0.856745000 |
| 1 | -6.189507000 | -0.193923000 | -1.314661000 |
| 1 | -5.384177000 | -1.749383000 | -1.260901000 |
| 1 | -5.572852000 | -0.807776000 | 0.209469000  |
| 6 | -3.891113000 | -0.005312000 | -2.718807000 |
| 1 | -3.020941000 | 0.567718000  | -3.041019000 |
| 1 | -3.809768000 | -1.021128000 | -3.122129000 |
| 1 | -4.779353000 | 0.438774000  | -3.179408000 |
| 1 | -1.177216000 | 1.029653000  | -2.222520000 |
| 1 | -1.650246000 | -1.364137000 | -4.053257000 |

**TS4''<sub>dis</sub>** (TE= -3507.050379)

|   |              |              |             |
|---|--------------|--------------|-------------|
| 6 | 0.954445000  | -1.588234000 | 1.669784000 |
| 6 | 0.670862000  | -2.531015000 | 2.671848000 |
| 1 | -0.290041000 | -2.488785000 | 3.183540000 |
| 6 | 1.598976000  | -3.495055000 | 3.051970000 |
| 1 | 1.353173000  | -4.207567000 | 3.835991000 |
| 6 | 2.844106000  | -3.537703000 | 2.435636000 |
| 1 | 3.582636000  | -4.276745000 | 2.736473000 |
| 6 | 3.134250000  | -2.644138000 | 1.408653000 |
| 1 | 4.100914000  | -2.707547000 | 0.915282000 |
| 6 | 2.197640000  | -1.690207000 | 1.007544000 |
| 6 | 0.557610000  | 1.063308000  | 1.933462000 |
| 6 | 1.277507000  | 1.098424000  | 3.140778000 |
| 1 | 1.574303000  | 0.159232000  | 3.607871000 |
| 6 | 1.608407000  | 2.295098000  | 3.766498000 |
| 1 | 2.162642000  | 2.283773000  | 4.702316000 |
| 6 | 1.229971000  | 3.502710000  | 3.192428000 |
| 1 | 1.477620000  | 4.445083000  | 3.674754000 |
| 6 | 0.543767000  | 3.499615000  | 1.982944000 |
| 1 | 0.270182000  | 4.449695000  | 1.530075000 |
| 6 | 0.213745000  | 2.300500000  | 1.345636000 |
| 6 | -1.553422000 | -0.568043000 | 1.782941000 |
| 6 | -1.998274000 | -0.291247000 | 3.087966000 |
| 1 | -1.294442000 | 0.120114000  | 3.811885000 |
| 6 | -3.311974000 | -0.512318000 | 3.478855000 |
| 1 | -3.622727000 | -0.286083000 | 4.496251000 |
| 6 | -4.231942000 | -0.999017000 | 2.556471000 |
| 1 | -5.268974000 | -1.157350000 | 2.841959000 |
| 6 | -3.822367000 | -1.267043000 | 1.257365000 |
| 1 | -4.561269000 | -1.618615000 | 0.543383000 |

|    |              |              |              |
|----|--------------|--------------|--------------|
| 6  | -2.492338000 | -1.068985000 | 0.865274000  |
| 23 | 0.139316000  | 0.105417000  | -1.476528000 |
| 6  | 3.987086000  | 0.253008000  | -0.307079000 |
| 1  | 4.745545000  | -0.522149000 | -0.119996000 |
| 6  | -2.283548000 | 2.981380000  | -0.037760000 |
| 1  | -2.078523000 | 4.025042000  | 0.235186000  |
| 6  | -1.720788000 | -3.203358000 | -1.047079000 |
| 1  | -2.247917000 | -3.444560000 | -1.978901000 |
| 6  | -2.341480000 | -3.998088000 | 0.093601000  |
| 1  | -2.249409000 | -5.070088000 | -0.108931000 |
| 1  | -1.828386000 | -3.798466000 | 1.040180000  |
| 1  | -3.400550000 | -3.785466000 | 0.251156000  |
| 6  | -0.261536000 | -3.591263000 | -1.225178000 |
| 1  | 0.339665000  | -3.317437000 | -0.351786000 |
| 1  | -0.167661000 | -4.674525000 | -1.353418000 |
| 1  | 0.182014000  | -3.125477000 | -2.109318000 |
| 6  | 4.366383000  | 1.005789000  | -1.577356000 |
| 1  | 3.635722000  | 1.773200000  | -1.835543000 |
| 1  | 5.331555000  | 1.503770000  | -1.441018000 |
| 1  | 4.459809000  | 0.355807000  | -2.449949000 |
| 6  | 3.934063000  | 1.163828000  | 0.910553000  |
| 1  | 3.741862000  | 0.607284000  | 1.831661000  |
| 1  | 4.889904000  | 1.683694000  | 1.031004000  |
| 1  | 3.155271000  | 1.927684000  | 0.823732000  |
| 6  | -3.064945000 | 2.955987000  | -1.344291000 |
| 1  | -3.969496000 | 3.567510000  | -1.267250000 |
| 1  | -2.493322000 | 3.325283000  | -2.201915000 |
| 1  | -3.385685000 | 1.937800000  | -1.584152000 |
| 6  | -3.073506000 | 2.367481000  | 1.103013000  |
| 1  | -3.394639000 | 1.347340000  | 0.883630000  |
| 1  | -2.508206000 | 2.345420000  | 2.038174000  |
| 1  | -3.978444000 | 2.958332000  | 1.279875000  |
| 5  | -0.010388000 | -0.354834000 | 1.533167000  |
| 7  | -0.040121000 | 0.999803000  | -3.353619000 |
| 7  | 1.100441000  | 1.176084000  | -2.810599000 |
| 1  | -0.060810000 | 0.806097000  | -4.367347000 |
| 15 | -1.944280000 | -1.336627000 | -0.862067000 |
| 15 | 2.405336000  | -0.703191000 | -0.518087000 |
| 15 | -0.569214000 | 2.287893000  | -0.304531000 |
| 6  | -3.507771000 | -0.966104000 | -1.855429000 |
| 1  | -4.006419000 | -0.204957000 | -1.237837000 |
| 6  | -4.463227000 | -2.144524000 | -2.036426000 |
| 1  | -5.429663000 | -1.779609000 | -2.397588000 |
| 1  | -4.096178000 | -2.846003000 | -2.791263000 |
| 1  | -4.654257000 | -2.719188000 | -1.129275000 |
| 6  | -3.215638000 | -0.354900000 | -3.219394000 |

|   |              |              |              |
|---|--------------|--------------|--------------|
| 1 | -2.644294000 | 0.573823000  | -3.156637000 |
| 1 | -2.661478000 | -1.050053000 | -3.861383000 |
| 1 | -4.154100000 | -0.128864000 | -3.736579000 |
| 6 | 0.232676000  | 3.682503000  | -1.288783000 |
| 1 | 0.056026000  | 3.358477000  | -2.321541000 |
| 6 | 1.737870000  | 3.689446000  | -1.059430000 |
| 1 | 2.143202000  | 2.678514000  | -1.016283000 |
| 1 | 2.248278000  | 4.214423000  | -1.872858000 |
| 1 | 2.004704000  | 4.191580000  | -0.125027000 |
| 6 | -0.341921000 | 5.087801000  | -1.150120000 |
| 1 | 0.231148000  | 5.766601000  | -1.790653000 |
| 1 | -1.384968000 | 5.167339000  | -1.463026000 |
| 1 | -0.267902000 | 5.487312000  | -0.134611000 |
| 6 | 2.851089000  | -2.031819000 | -1.790851000 |
| 1 | 2.300501000  | -2.904357000 | -1.419757000 |
| 6 | 4.319426000  | -2.427504000 | -1.893482000 |
| 1 | 4.416381000  | -3.278259000 | -2.576015000 |
| 1 | 4.945742000  | -1.629116000 | -2.297463000 |
| 1 | 4.755130000  | -2.738959000 | -0.943203000 |
| 6 | 2.302100000  | -1.675974000 | -3.168115000 |
| 1 | 1.212544000  | -1.516650000 | -3.170166000 |
| 1 | 2.753874000  | -0.769386000 | -3.579139000 |
| 1 | 2.483192000  | -2.491881000 | -3.876140000 |
| 1 | -0.669751000 | -0.286877000 | -2.968976000 |

For catalyst [**1f'**<sub>SB</sub>]

[**4f'**<sub>SB</sub> -**V-H**]<sup>+</sup> (TE= -3322.247307)

|   |              |              |              |
|---|--------------|--------------|--------------|
| 6 | 1.673732000  | -0.944371000 | -1.003607000 |
| 6 | 2.635884000  | -0.960215000 | -2.022608000 |
| 1 | 2.550592000  | -0.258885000 | -2.852695000 |
| 6 | 3.676565000  | -1.883629000 | -2.010466000 |
| 1 | 4.405973000  | -1.888455000 | -2.816616000 |
| 6 | 3.782536000  | -2.808225000 | -0.973150000 |
| 1 | 4.594029000  | -3.531259000 | -0.966416000 |
| 6 | 2.873174000  | -2.782736000 | 0.078080000  |
| 1 | 2.988908000  | -3.457393000 | 0.923520000  |
| 6 | 1.834482000  | -1.855054000 | 0.048859000  |
| 6 | -0.893855000 | -0.944308000 | -1.665299000 |
| 6 | -0.706467000 | -1.727545000 | -2.817912000 |
| 1 | 0.301555000  | -1.852615000 | -3.211453000 |
| 6 | -1.772156000 | -2.312210000 | -3.489483000 |
| 1 | -1.594095000 | -2.891516000 | -4.391789000 |
| 6 | -3.066583000 | -2.162538000 | -2.999453000 |
| 1 | -3.906032000 | -2.624947000 | -3.512353000 |
| 6 | -3.282681000 | -1.459179000 | -1.821068000 |

|    |              |              |              |
|----|--------------|--------------|--------------|
| 1  | -4.282557000 | -1.407200000 | -1.395795000 |
| 6  | -2.208695000 | -0.852531000 | -1.171298000 |
| 6  | 0.229763000  | 1.439761000  | -1.137062000 |
| 6  | -0.566256000 | 1.927842000  | -2.206143000 |
| 1  | -1.170416000 | 1.221828000  | -2.769152000 |
| 6  | -0.552828000 | 3.252597000  | -2.608207000 |
| 1  | -1.151663000 | 3.564483000  | -3.459984000 |
| 6  | 0.215064000  | 4.179434000  | -1.910977000 |
| 1  | 0.223610000  | 5.225031000  | -2.208258000 |
| 6  | 0.947918000  | 3.770127000  | -0.806574000 |
| 1  | 1.494975000  | 4.497717000  | -0.213051000 |
| 6  | 0.977084000  | 2.426680000  | -0.429864000 |
| 16 | 1.729769000  | 2.078160000  | 1.158516000  |
| 16 | 0.788637000  | -1.583778000 | 1.465421000  |
| 16 | -2.461787000 | -0.201300000 | 0.472316000  |
| 23 | -0.357756000 | 0.754904000  | 1.329188000  |
| 6  | -0.139401000 | -3.181568000 | 1.734900000  |
| 1  | 0.655031000  | -3.873945000 | 2.039111000  |
| 6  | -3.860292000 | 1.023315000  | 0.326724000  |
| 1  | -4.692872000 | 0.408296000  | -0.035964000 |
| 6  | 3.588740000  | 1.757786000  | 0.913636000  |
| 1  | 3.977873000  | 2.498065000  | 1.620855000  |
| 6  | 4.012071000  | 2.120183000  | -0.488830000 |
| 1  | 5.098549000  | 2.012202000  | -0.569543000 |
| 1  | 3.560772000  | 1.454223000  | -1.229355000 |
| 1  | 3.763805000  | 3.149822000  | -0.754912000 |
| 6  | 4.019923000  | 0.376954000  | 1.343852000  |
| 1  | 3.808869000  | -0.370523000 | 0.580288000  |
| 1  | 5.103730000  | 0.382708000  | 1.502093000  |
| 1  | 3.558178000  | 0.059398000  | 2.282071000  |
| 6  | -1.085990000 | -2.943888000 | 2.893693000  |
| 1  | -0.568752000 | -2.606097000 | 3.794869000  |
| 1  | -1.849351000 | -2.201586000 | 2.640223000  |
| 1  | -1.603749000 | -3.875629000 | 3.138277000  |
| 6  | -0.824560000 | -3.688872000 | 0.487987000  |
| 1  | -0.147858000 | -3.748769000 | -0.368647000 |
| 1  | -1.209307000 | -4.696880000 | 0.674759000  |
| 1  | -1.673957000 | -3.060495000 | 0.210957000  |
| 6  | -4.151565000 | 1.513018000  | 1.730649000  |
| 1  | -5.037116000 | 2.154486000  | 1.714276000  |
| 1  | -4.344778000 | 0.694488000  | 2.428602000  |
| 1  | -3.317428000 | 2.104745000  | 2.117299000  |
| 6  | -3.549463000 | 2.134261000  | -0.646023000 |
| 1  | -2.679551000 | 2.709678000  | -0.314847000 |
| 1  | -3.356664000 | 1.758645000  | -1.654553000 |
| 1  | -4.403053000 | 2.817455000  | -0.707221000 |

|   |              |              |              |
|---|--------------|--------------|--------------|
| 5 | 0.338256000  | -0.133128000 | -1.124625000 |
| 7 | -1.270494000 | 0.562268000  | 4.186775000  |
| 7 | -0.810142000 | 0.651847000  | 3.073702000  |
| 1 | -0.658303000 | 0.980290000  | 4.919330000  |
| 1 | -1.080149000 | 2.276840000  | 1.432373000  |

**TS4'**<sub>dis</sub> (TE= -3322.229207)

|    |              |              |              |
|----|--------------|--------------|--------------|
| 6  | -1.061574000 | -1.074430000 | -1.710041000 |
| 6  | -0.912148000 | -1.540476000 | -3.025879000 |
| 1  | -0.297176000 | -0.971781000 | -3.722619000 |
| 6  | -1.544223000 | -2.699408000 | -3.462968000 |
| 1  | -1.427750000 | -3.024895000 | -4.493609000 |
| 6  | -2.303005000 | -3.454514000 | -2.575214000 |
| 1  | -2.781918000 | -4.373027000 | -2.904493000 |
| 6  | -2.424502000 | -3.049708000 | -1.249772000 |
| 1  | -2.974073000 | -3.658381000 | -0.535848000 |
| 6  | -1.825672000 | -1.862603000 | -0.834608000 |
| 6  | -1.302216000 | 1.491466000  | -0.829330000 |
| 6  | -2.471193000 | 1.765088000  | -1.558860000 |
| 1  | -2.770046000 | 1.076025000  | -2.348320000 |
| 6  | -3.241176000 | 2.899114000  | -1.320044000 |
| 1  | -4.130994000 | 3.086701000  | -1.915768000 |
| 6  | -2.879440000 | 3.779842000  | -0.308418000 |
| 1  | -3.482259000 | 4.660506000  | -0.102862000 |
| 6  | -1.752340000 | 3.519221000  | 0.466775000  |
| 1  | -1.489866000 | 4.176345000  | 1.292054000  |
| 6  | -0.964588000 | 2.402097000  | 0.197390000  |
| 6  | 1.065190000  | 0.561341000  | -1.705279000 |
| 6  | 1.356983000  | 1.591342000  | -2.611232000 |
| 1  | 0.540458000  | 2.203832000  | -2.993038000 |
| 6  | 2.657585000  | 1.850155000  | -3.029456000 |
| 1  | 2.855906000  | 2.643732000  | -3.744844000 |
| 6  | 3.701705000  | 1.098083000  | -2.505353000 |
| 1  | 4.727125000  | 1.297944000  | -2.806209000 |
| 6  | 3.451602000  | 0.086422000  | -1.581259000 |
| 1  | 4.291658000  | -0.466973000 | -1.176000000 |
| 6  | 2.141216000  | -0.190605000 | -1.195533000 |
| 16 | 1.720554000  | -1.426827000 | 0.031636000  |
| 16 | -1.920346000 | -1.458229000 | 0.909271000  |
| 16 | 0.353640000  | 2.058782000  | 1.372001000  |
| 23 | 0.073757000  | -0.334830000 | 1.832924000  |
| 5  | -0.423679000 | 0.299243000  | -1.327646000 |
| 7  | 0.486833000  | -2.033271000 | 3.644050000  |
| 7  | 0.953330000  | -0.930638000 | 3.370681000  |
| 1  | -1.196632000 | 0.374046000  | 2.672606000  |
| 1  | 0.854674000  | -2.433545000 | 4.532235000  |



|   |              |              |              |
|---|--------------|--------------|--------------|
| 6 | -3.461659000 | -0.387793000 | 1.124188000  |
| 1 | -3.094371000 | 0.637491000  | 1.012994000  |
| 6 | -4.490633000 | -0.713690000 | 0.068886000  |
| 1 | -5.368437000 | -0.078899000 | 0.225614000  |
| 1 | -4.131058000 | -0.532815000 | -0.946192000 |
| 1 | -4.824873000 | -1.754139000 | 0.129445000  |
| 6 | -3.954203000 | -0.622184000 | 2.535057000  |
| 1 | -4.318236000 | -1.644680000 | 2.669619000  |
| 1 | -3.174373000 | -0.429124000 | 3.274851000  |
| 1 | -4.784361000 | 0.059132000  | 2.745512000  |
| 6 | 3.344768000  | -2.205963000 | 0.485685000  |
| 1 | 4.051961000  | -1.375292000 | 0.586177000  |
| 6 | 3.764247000  | -3.153374000 | -0.621903000 |
| 1 | 4.763855000  | -3.547637000 | -0.412903000 |
| 1 | 3.079898000  | -4.003119000 | -0.689495000 |
| 1 | 3.795183000  | -2.674765000 | -1.603154000 |
| 6 | 3.204339000  | -2.894204000 | 1.827201000  |
| 1 | 3.056252000  | -2.181424000 | 2.639154000  |
| 1 | 2.379226000  | -3.613027000 | 1.840325000  |
| 1 | 4.121287000  | -3.451676000 | 2.038449000  |
| 6 | 1.960198000  | 2.704336000  | 0.664955000  |
| 1 | 2.085802000  | 2.253201000  | -0.317025000 |
| 6 | 1.879780000  | 4.208958000  | 0.542887000  |
| 1 | 2.821759000  | 4.594368000  | 0.139596000  |
| 1 | 1.083895000  | 4.521934000  | -0.138930000 |
| 1 | 1.710455000  | 4.691104000  | 1.510224000  |
| 6 | 3.039344000  | 2.210023000  | 1.607306000  |
| 1 | 2.920239000  | 2.610230000  | 2.618743000  |
| 1 | 3.055518000  | 1.116191000  | 1.676111000  |
| 1 | 4.019358000  | 2.529528000  | 1.240162000  |

$\eta_{NN}^2 - [4f''_{SB} - V - H]^+$  (TE= -3322.245344)

|   |              |              |              |
|---|--------------|--------------|--------------|
| 6 | -1.298698000 | -1.341373000 | -1.461178000 |
| 6 | -1.394842000 | -2.002311000 | -2.693347000 |
| 1 | -0.930668000 | -1.560169000 | -3.574598000 |
| 6 | -2.078683000 | -3.207956000 | -2.814587000 |
| 1 | -2.153680000 | -3.693276000 | -3.784523000 |
| 6 | -2.641747000 | -3.804780000 | -1.691676000 |
| 1 | -3.157980000 | -4.757570000 | -1.776866000 |
| 6 | -2.519560000 | -3.194058000 | -0.447235000 |
| 1 | -2.918361000 | -3.673422000 | 0.443801000  |
| 6 | -1.873048000 | -1.965122000 | -0.343957000 |
| 6 | -1.448831000 | 1.316231000  | -1.012457000 |
| 6 | -2.663143000 | 1.505530000  | -1.691124000 |
| 1 | -2.999371000 | 0.739496000  | -2.389706000 |
| 6 | -3.441072000 | 2.644241000  | -1.506729000 |

|    |              |              |              |
|----|--------------|--------------|--------------|
| 1  | -4.369414000 | 2.763082000  | -2.059844000 |
| 6  | -3.039499000 | 3.614750000  | -0.597501000 |
| 1  | -3.648474000 | 4.499282000  | -0.429748000 |
| 6  | -1.861767000 | 3.440517000  | 0.123735000  |
| 1  | -1.560287000 | 4.173775000  | 0.867648000  |
| 6  | -1.067145000 | 2.316268000  | -0.095676000 |
| 6  | 0.879499000  | 0.225240000  | -1.836514000 |
| 6  | 1.201730000  | 1.153009000  | -2.836391000 |
| 1  | 0.401577000  | 1.737403000  | -3.290454000 |
| 6  | 2.514784000  | 1.354540000  | -3.250852000 |
| 1  | 2.735919000  | 2.065273000  | -4.042722000 |
| 6  | 3.544065000  | 0.674558000  | -2.610854000 |
| 1  | 4.578832000  | 0.854904000  | -2.891540000 |
| 6  | 3.264265000  | -0.241179000 | -1.597830000 |
| 1  | 4.084657000  | -0.743250000 | -1.094885000 |
| 6  | 1.940413000  | -0.495497000 | -1.249989000 |
| 16 | 1.463410000  | -1.685537000 | 0.000393000  |
| 16 | -1.644605000 | -1.268249000 | 1.296461000  |
| 16 | 0.352486000  | 2.143046000  | 0.996093000  |
| 23 | 0.551686000  | -0.148617000 | 1.921090000  |
| 5  | -0.602697000 | 0.055628000  | -1.377455000 |
| 7  | 1.727986000  | 0.439824000  | 3.393024000  |
| 7  | 2.484413000  | -0.056832000 | 2.572897000  |
| 1  | -0.685085000 | 0.388063000  | 2.922213000  |
| 1  | 2.075190000  | 0.861989000  | 4.271441000  |
| 6  | -3.158281000 | -0.183106000 | 1.601555000  |
| 1  | -2.819747000 | 0.826037000  | 1.343407000  |
| 6  | -4.313586000 | -0.597789000 | 0.720847000  |
| 1  | -5.161750000 | 0.064347000  | 0.921870000  |
| 1  | -4.085734000 | -0.527003000 | -0.344339000 |
| 1  | -4.640788000 | -1.620813000 | 0.931095000  |
| 6  | -3.489005000 | -0.269449000 | 3.075520000  |
| 1  | -3.832049000 | -1.271221000 | 3.349703000  |
| 1  | -2.634242000 | -0.010746000 | 3.703262000  |
| 1  | -4.294736000 | 0.434246000  | 3.306977000  |
| 6  | 3.022658000  | -2.481618000 | 0.592532000  |
| 1  | 3.715949000  | -1.669405000 | 0.837390000  |
| 6  | 3.577454000  | -3.403530000 | -0.477367000 |
| 1  | 4.529125000  | -3.825942000 | -0.140161000 |
| 1  | 2.895145000  | -4.236637000 | -0.666599000 |
| 1  | 3.758139000  | -2.902617000 | -1.429957000 |
| 6  | 2.660477000  | -3.245427000 | 1.854065000  |
| 1  | 2.317673000  | -2.594891000 | 2.663247000  |
| 1  | 1.887449000  | -3.995989000 | 1.662577000  |
| 1  | 3.541746000  | -3.776444000 | 2.223910000  |
| 6  | 1.819332000  | 2.838056000  | 0.054191000  |

|   |             |             |              |
|---|-------------|-------------|--------------|
| 1 | 2.045183000 | 2.123257000 | -0.735530000 |
| 6 | 1.456299000 | 4.178988000 | -0.541152000 |
| 1 | 2.321228000 | 4.577573000 | -1.081113000 |
| 1 | 0.631639000 | 4.107983000 | -1.254632000 |
| 1 | 1.181651000 | 4.908650000 | 0.227003000  |
| 6 | 2.976737000 | 2.902125000 | 1.027821000  |
| 1 | 2.755966000 | 3.534378000 | 1.893690000  |
| 1 | 3.273470000 | 1.913386000 | 1.387135000  |
| 1 | 3.846276000 | 3.332072000 | 0.521372000  |

**TS4''<sub>dis</sub>** (TE= -3322.211383)

|    |              |              |              |
|----|--------------|--------------|--------------|
| 6  | 1.198152000  | -1.380642000 | 1.490910000  |
| 6  | 1.165633000  | -2.052054000 | 2.722410000  |
| 1  | 0.569415000  | -1.640220000 | 3.536123000  |
| 6  | 1.887255000  | -3.223253000 | 2.930893000  |
| 1  | 1.854665000  | -3.714579000 | 3.900091000  |
| 6  | 2.628514000  | -3.777574000 | 1.893563000  |
| 1  | 3.178051000  | -4.703236000 | 2.043772000  |
| 6  | 2.640462000  | -3.162155000 | 0.645423000  |
| 1  | 3.177028000  | -3.612994000 | -0.185875000 |
| 6  | 1.945765000  | -1.969566000 | 0.459038000  |
| 6  | 1.320799000  | 1.296230000  | 1.082501000  |
| 6  | 2.497324000  | 1.501518000  | 1.820286000  |
| 1  | 2.837189000  | 0.718361000  | 2.497930000  |
| 6  | 3.229986000  | 2.681072000  | 1.721884000  |
| 1  | 4.130665000  | 2.811644000  | 2.316692000  |
| 6  | 2.817877000  | 3.681601000  | 0.850165000  |
| 1  | 3.391227000  | 4.600126000  | 0.755255000  |
| 6  | 1.678321000  | 3.494576000  | 0.071730000  |
| 1  | 1.373968000  | 4.251898000  | -0.646846000 |
| 6  | 0.933179000  | 2.324130000  | 0.198202000  |
| 6  | -1.000280000 | 0.167898000  | 1.824404000  |
| 6  | -1.308502000 | 1.064944000  | 2.857081000  |
| 1  | -0.500516000 | 1.627905000  | 3.323918000  |
| 6  | -2.616285000 | 1.264208000  | 3.287943000  |
| 1  | -2.825524000 | 1.954707000  | 4.100650000  |
| 6  | -3.654681000 | 0.601994000  | 2.644777000  |
| 1  | -4.685347000 | 0.773180000  | 2.945411000  |
| 6  | -3.389199000 | -0.282714000 | 1.601289000  |
| 1  | -4.218834000 | -0.767746000 | 1.097684000  |
| 6  | -2.071417000 | -0.517704000 | 1.219449000  |
| 16 | -1.620452000 | -1.634062000 | -0.109102000 |
| 16 | 1.879907000  | -1.302072000 | -1.206280000 |
| 16 | -0.404926000 | 2.083443000  | -0.980481000 |
| 23 | -0.334853000 | -0.233272000 | -1.827691000 |
| 5  | 0.486173000  | 0.005712000  | 1.370149000  |
| 7  | -0.454138000 | 0.144386000  | -3.762896000 |

|   |              |              |              |
|---|--------------|--------------|--------------|
| 7 | -1.617207000 | 0.197403000  | -3.213174000 |
| 1 | 0.572876000  | 0.757821000  | -3.004245000 |
| 1 | -0.281196000 | 0.645647000  | -4.641786000 |
| 6 | 3.309404000  | -0.086773000 | -1.356609000 |
| 1 | 2.918961000  | 0.862375000  | -0.975598000 |
| 6 | 4.490660000  | -0.537371000 | -0.531346000 |
| 1 | 5.300936000  | 0.190063000  | -0.643113000 |
| 1 | 4.256050000  | -0.605840000 | 0.533165000  |
| 1 | 4.872685000  | -1.508900000 | -0.859842000 |
| 6 | 3.621379000  | 0.027368000  | -2.833479000 |
| 1 | 4.008187000  | -0.911934000 | -3.238101000 |
| 1 | 2.745604000  | 0.315659000  | -3.422458000 |
| 1 | 4.382946000  | 0.797259000  | -2.988570000 |
| 6 | -3.216862000 | -2.253784000 | -0.827598000 |
| 1 | -3.858978000 | -1.371679000 | -0.937633000 |
| 6 | -3.830754000 | -3.288320000 | 0.097102000  |
| 1 | -4.805270000 | -3.597527000 | -0.293798000 |
| 1 | -3.201026000 | -4.180243000 | 0.153886000  |
| 1 | -3.982434000 | -2.927770000 | 1.116002000  |
| 6 | -2.903202000 | -2.832783000 | -2.194737000 |
| 1 | -2.515081000 | -2.080592000 | -2.884903000 |
| 1 | -2.187893000 | -3.658656000 | -2.127229000 |
| 1 | -3.818873000 | -3.238702000 | -2.633413000 |
| 6 | -1.975726000 | 2.680268000  | -0.143127000 |
| 1 | -2.122050000 | 2.042358000  | 0.726728000  |
| 6 | -1.796276000 | 4.117297000  | 0.288723000  |
| 1 | -2.710795000 | 4.463360000  | 0.781235000  |
| 1 | -0.978887000 | 4.234768000  | 1.005373000  |
| 1 | -1.606309000 | 4.780633000  | -0.560645000 |
| 6 | -3.097263000 | 2.466511000  | -1.134947000 |
| 1 | -2.958189000 | 3.050377000  | -2.049827000 |
| 1 | -3.199917000 | 1.417229000  | -1.423065000 |
| 1 | -4.041196000 | 2.782948000  | -0.680114000 |

Cartesian coordinates of TS involved in the conversion of  $[5]_{\text{alt}} \rightarrow [5]_{\text{dis}}$  for the catalysts  $[1c''_{\text{PB}}]$  and  $[1f''_{\text{SB}}]$ , along with their total energies (in hartree) including zero point vibrational correction at M06-L-D3(heptane)/6-311+G\* level of theory.

For catalyst  $[1c''_{\text{PB}}]$

**TS5** (Triplet, TE= -3507.029777)

|   |              |              |             |
|---|--------------|--------------|-------------|
| 6 | -0.168545000 | -1.266032000 | 1.543673000 |
| 6 | -1.165254000 | -1.932076000 | 2.313268000 |
| 1 | -1.957251000 | -1.340074000 | 2.762326000 |
| 6 | -1.140557000 | -3.286999000 | 2.584147000 |
| 1 | -1.901276000 | -3.721081000 | 3.229020000 |

|    |              |              |              |
|----|--------------|--------------|--------------|
| 6  | -0.153088000 | -4.091956000 | 2.017629000  |
| 1  | -0.137260000 | -5.163725000 | 2.199293000  |
| 6  | 0.811978000  | -3.508317000 | 1.220231000  |
| 1  | 1.569160000  | -4.142064000 | 0.771036000  |
| 6  | 0.858521000  | -2.116528000 | 1.005903000  |
| 6  | 0.775680000  | 1.395504000  | 1.848564000  |
| 6  | 1.099487000  | 1.640766000  | 3.192297000  |
| 1  | 0.664098000  | 1.012579000  | 3.970059000  |
| 6  | 1.989790000  | 2.643309000  | 3.557384000  |
| 1  | 2.230891000  | 2.799288000  | 4.606554000  |
| 6  | 2.582845000  | 3.439842000  | 2.581357000  |
| 1  | 3.284083000  | 4.221870000  | 2.861636000  |
| 6  | 2.268869000  | 3.233559000  | 1.243609000  |
| 1  | 2.724770000  | 3.866292000  | 0.485513000  |
| 6  | 1.371778000  | 2.224504000  | 0.877175000  |
| 6  | -1.844772000 | 0.799024000  | 1.680594000  |
| 6  | -2.164118000 | 1.632150000  | 2.764083000  |
| 1  | -1.359782000 | 2.070582000  | 3.350579000  |
| 6  | -3.477396000 | 1.899821000  | 3.131857000  |
| 1  | -3.682623000 | 2.541733000  | 3.985627000  |
| 6  | -4.524005000 | 1.331566000  | 2.416671000  |
| 1  | -5.555961000 | 1.512016000  | 2.707455000  |
| 6  | -4.244222000 | 0.544786000  | 1.304700000  |
| 1  | -5.073080000 | 0.126353000  | 0.745334000  |
| 6  | -2.925836000 | 0.295705000  | 0.911110000  |
| 23 | 0.055742000  | -0.471787000 | -0.859758000 |
| 6  | 3.663582000  | -1.312903000 | 1.236379000  |
| 1  | 3.795603000  | -2.378553000 | 1.472342000  |
| 6  | -0.330674000 | 3.278693000  | -1.279412000 |
| 1  | 0.288187000  | 4.185513000  | -1.238278000 |
| 6  | -3.247182000 | -2.225649000 | -0.804620000 |
| 1  | -3.860053000 | -2.182574000 | -1.715153000 |
| 6  | -4.154096000 | -2.611419000 | 0.354378000  |
| 1  | -4.479936000 | -3.650634000 | 0.241344000  |
| 1  | -3.646286000 | -2.532928000 | 1.319356000  |
| 1  | -5.055020000 | -1.996958000 | 0.407919000  |
| 6  | -2.155517000 | -3.264918000 | -1.034209000 |
| 1  | -1.471665000 | -3.330804000 | -0.183705000 |
| 1  | -2.593257000 | -4.258710000 | -1.173651000 |
| 1  | -1.555963000 | -3.048639000 | -1.924898000 |
| 6  | 4.943040000  | -0.788647000 | 0.598111000  |
| 1  | 5.159256000  | -1.215915000 | -0.383528000 |
| 1  | 4.913462000  | 0.297653000  | 0.487563000  |
| 1  | 5.794997000  | -1.021208000 | 1.245007000  |
| 6  | 3.368749000  | -0.572215000 | 2.523941000  |
| 1  | 2.427185000  | -0.876327000 | 2.988792000  |

|    |              |              |              |
|----|--------------|--------------|--------------|
| 1  | 4.169441000  | -0.764638000 | 3.245712000  |
| 1  | 3.334472000  | 0.506572000  | 2.361288000  |
| 6  | -0.832200000 | 3.074825000  | -2.704855000 |
| 1  | -1.540665000 | 3.861523000  | -2.982810000 |
| 1  | -0.030963000 | 3.084637000  | -3.448433000 |
| 1  | -1.351826000 | 2.117503000  | -2.809795000 |
| 6  | -1.471701000 | 3.453737000  | -0.292462000 |
| 1  | -2.163153000 | 2.607648000  | -0.303162000 |
| 1  | -1.119409000 | 3.569855000  | 0.736255000  |
| 1  | -2.049600000 | 4.347942000  | -0.546872000 |
| 5  | -0.341634000 | 0.329566000  | 1.486377000  |
| 7  | 0.564353000  | -0.680906000 | -3.967039000 |
| 7  | 0.282301000  | -0.685367000 | -2.594307000 |
| 15 | -2.494327000 | -0.503318000 | -0.679707000 |
| 15 | 2.225878000  | -1.393221000 | 0.029941000  |
| 15 | 0.830082000  | 1.893146000  | -0.828813000 |
| 6  | -3.449826000 | 0.427339000  | -1.999660000 |
| 1  | -3.128880000 | 1.470312000  | -1.884735000 |
| 6  | -4.970060000 | 0.387944000  | -1.884630000 |
| 1  | -5.414834000 | 0.791716000  | -2.799595000 |
| 1  | -5.364238000 | -0.627530000 | -1.771083000 |
| 1  | -5.347063000 | 0.993703000  | -1.061461000 |
| 6  | -3.002288000 | -0.063647000 | -3.372459000 |
| 1  | -1.935624000 | 0.088969000  | -3.540243000 |
| 1  | -3.212504000 | -1.128752000 | -3.523803000 |
| 1  | -3.537337000 | 0.474611000  | -4.160469000 |
| 6  | 2.247417000  | 2.189944000  | -2.029232000 |
| 1  | 1.905619000  | 1.667539000  | -2.935825000 |
| 6  | 3.538151000  | 1.528962000  | -1.573765000 |
| 1  | 3.417336000  | 0.461672000  | -1.398231000 |
| 1  | 4.312624000  | 1.646411000  | -2.338099000 |
| 1  | 3.918759000  | 1.980766000  | -0.652301000 |
| 6  | 2.520833000  | 3.648189000  | -2.394790000 |
| 1  | 3.343245000  | 3.685158000  | -3.116025000 |
| 1  | 1.675830000  | 4.158920000  | -2.857254000 |
| 1  | 2.835770000  | 4.244355000  | -1.533918000 |
| 6  | 2.764245000  | -2.733921000 | -1.173047000 |
| 1  | 1.810607000  | -3.222346000 | -1.426836000 |
| 6  | 3.737943000  | -3.787471000 | -0.649894000 |
| 1  | 3.853161000  | -4.576578000 | -1.399460000 |
| 1  | 4.734988000  | -3.370650000 | -0.482781000 |
| 1  | 3.434258000  | -4.272043000 | 0.280212000  |
| 6  | 3.323258000  | -2.111648000 | -2.452107000 |
| 1  | 2.653912000  | -1.374241000 | -2.895849000 |
| 1  | 4.292920000  | -1.633713000 | -2.280214000 |
| 1  | 3.489844000  | -2.892097000 | -3.201377000 |

|   |              |              |              |
|---|--------------|--------------|--------------|
| 1 | -0.280156000 | -1.423643000 | -3.258073000 |
| 1 | 0.177245000  | 0.195886000  | -4.353163000 |

**TS5** (Quintet, TE= -3506.997164)

|    |              |              |              |
|----|--------------|--------------|--------------|
| 6  | 0.069965000  | 1.228242000  | 1.591201000  |
| 6  | 1.018399000  | 1.907469000  | 2.411520000  |
| 1  | 1.842594000  | 1.338786000  | 2.831917000  |
| 6  | 0.902178000  | 3.236593000  | 2.768245000  |
| 1  | 1.624584000  | 3.676550000  | 3.451899000  |
| 6  | -0.126161000 | 4.012597000  | 2.232290000  |
| 1  | -0.212854000 | 5.067837000  | 2.479091000  |
| 6  | -1.037827000 | 3.422284000  | 1.378812000  |
| 1  | -1.826346000 | 4.035482000  | 0.955061000  |
| 6  | -0.999103000 | 2.045012000  | 1.083083000  |
| 6  | -0.759322000 | -1.465571000 | 1.761818000  |
| 6  | -1.116281000 | -1.761910000 | 3.087109000  |
| 1  | -0.727050000 | -1.142311000 | 3.895765000  |
| 6  | -1.979365000 | -2.806319000 | 3.395666000  |
| 1  | -2.245534000 | -3.002911000 | 4.431942000  |
| 6  | -2.513012000 | -3.593343000 | 2.378537000  |
| 1  | -3.192687000 | -4.408719000 | 2.613642000  |
| 6  | -2.163962000 | -3.336782000 | 1.058080000  |
| 1  | -2.566655000 | -3.968576000 | 0.269299000  |
| 6  | -1.294177000 | -2.285640000 | 0.748537000  |
| 6  | 1.843320000  | -0.763195000 | 1.689589000  |
| 6  | 2.170579000  | -1.615419000 | 2.756185000  |
| 1  | 1.368942000  | -2.073363000 | 3.331898000  |
| 6  | 3.484885000  | -1.888371000 | 3.113328000  |
| 1  | 3.695424000  | -2.547470000 | 3.952682000  |
| 6  | 4.526716000  | -1.309555000 | 2.399241000  |
| 1  | 5.561021000  | -1.501849000 | 2.673825000  |
| 6  | 4.238733000  | -0.493822000 | 1.311160000  |
| 1  | 5.065674000  | -0.067583000 | 0.755378000  |
| 6  | 2.918313000  | -0.225510000 | 0.934758000  |
| 23 | -0.062319000 | 0.526396000  | -0.811558000 |
| 6  | -3.785394000 | 1.127325000  | 1.204787000  |
| 1  | -3.996025000 | 2.175256000  | 1.463574000  |
| 6  | 0.504405000  | -3.350260000 | -1.252377000 |
| 1  | -0.148938000 | -4.233149000 | -1.215735000 |
| 6  | 3.164163000  | 2.359582000  | -0.725179000 |
| 1  | 3.630492000  | 2.394350000  | -1.720062000 |
| 6  | 4.228221000  | 2.661889000  | 0.318911000  |
| 1  | 4.564967000  | 3.699379000  | 0.222766000  |
| 1  | 3.841914000  | 2.538207000  | 1.336308000  |
| 1  | 5.111497000  | 2.026170000  | 0.222769000  |

|    |              |              |              |
|----|--------------|--------------|--------------|
| 6  | 2.053531000  | 3.402995000  | -0.709397000 |
| 1  | 1.514822000  | 3.409692000  | 0.239431000  |
| 1  | 2.478206000  | 4.403669000  | -0.842589000 |
| 1  | 1.324640000  | 3.243412000  | -1.507930000 |
| 6  | -4.998912000 | 0.534516000  | 0.501662000  |
| 1  | -5.228819000 | 1.004673000  | -0.457420000 |
| 1  | -4.867167000 | -0.535956000 | 0.323433000  |
| 1  | -5.884215000 | 0.647371000  | 1.135453000  |
| 6  | -3.485007000 | 0.368444000  | 2.480985000  |
| 1  | -2.580953000 | 0.719576000  | 2.985782000  |
| 1  | -4.319406000 | 0.485228000  | 3.180399000  |
| 1  | -3.371695000 | -0.700082000 | 2.289211000  |
| 6  | 1.127398000  | -3.244056000 | -2.638217000 |
| 1  | 1.621906000  | -4.181972000 | -2.909758000 |
| 1  | 0.408972000  | -3.015861000 | -3.430835000 |
| 1  | 1.890777000  | -2.463584000 | -2.661921000 |
| 6  | 1.569401000  | -3.518303000 | -0.182554000 |
| 1  | 2.279932000  | -2.686919000 | -0.175837000 |
| 1  | 1.147361000  | -3.595273000 | 0.822985000  |
| 1  | 2.142996000  | -4.431738000 | -0.370723000 |
| 5  | 0.328685000  | -0.347494000 | 1.473572000  |
| 7  | -0.500501000 | 1.538342000  | -3.840664000 |
| 7  | -0.008303000 | 1.358212000  | -2.607107000 |
| 15 | 2.480092000  | 0.610890000  | -0.638384000 |
| 15 | -2.318610000 | 1.306714000  | 0.048800000  |
| 15 | -0.667278000 | -1.933236000 | -0.927731000 |
| 6  | 3.489382000  | -0.285480000 | -1.944914000 |
| 1  | 3.368466000  | -1.345170000 | -1.679800000 |
| 6  | 4.980964000  | 0.027366000  | -1.994737000 |
| 1  | 5.445678000  | -0.546658000 | -2.802997000 |
| 1  | 5.177588000  | 1.081501000  | -2.211677000 |
| 1  | 5.515322000  | -0.233270000 | -1.082142000 |
| 6  | 2.873023000  | -0.052788000 | -3.320514000 |
| 1  | 1.830612000  | -0.377913000 | -3.368584000 |
| 1  | 2.915293000  | 1.006447000  | -3.604441000 |
| 1  | 3.426262000  | -0.604520000 | -4.087319000 |
| 6  | -2.026117000 | -2.279985000 | -2.190164000 |
| 1  | -1.674470000 | -1.723308000 | -3.073382000 |
| 6  | -3.364331000 | -1.692012000 | -1.766551000 |
| 1  | -3.290538000 | -0.643413000 | -1.483107000 |
| 1  | -4.087594000 | -1.764159000 | -2.585217000 |
| 1  | -3.785144000 | -2.233537000 | -0.913931000 |
| 6  | -2.219513000 | -3.737617000 | -2.604009000 |
| 1  | -3.012611000 | -3.792538000 | -3.356629000 |
| 1  | -1.334369000 | -4.197372000 | -3.044437000 |
| 1  | -2.539165000 | -4.368773000 | -1.770143000 |



|   |              |             |              |
|---|--------------|-------------|--------------|
| 6 | -2.875899000 | 2.663483000 | -1.126149000 |
| 1 | -1.935541000 | 3.189634000 | -1.350877000 |
| 6 | -3.906250000 | 3.669888000 | -0.623439000 |
| 1 | -4.055486000 | 4.448629000 | -1.378146000 |
| 1 | -4.882080000 | 3.203808000 | -0.459832000 |
| 1 | -3.632087000 | 4.174557000 | 0.304829000  |
| 6 | -3.380055000 | 2.028633000 | -2.422737000 |
| 1 | -2.747812000 | 1.201579000 | -2.753554000 |
| 1 | -4.391166000 | 1.624825000 | -2.310562000 |
| 1 | -3.418958000 | 2.768327000 | -3.228214000 |
| 1 | 0.647393000  | 1.487416000 | -3.682467000 |
| 1 | -1.346817000 | 0.982252000 | -4.084374000 |

For catalyst [**1f'**<sub>SB</sub>]

**TS5** (Triplet, TE= -3322.186086)

|    |              |              |              |
|----|--------------|--------------|--------------|
| 6  | 1.568726000  | 1.234116000  | 0.932961000  |
| 6  | 2.356743000  | 1.609959000  | 2.032194000  |
| 1  | 2.065333000  | 1.291715000  | 3.032918000  |
| 6  | 3.509475000  | 2.371593000  | 1.871344000  |
| 1  | 4.099777000  | 2.649559000  | 2.741176000  |
| 6  | 3.915696000  | 2.771791000  | 0.600387000  |
| 1  | 4.820726000  | 3.359819000  | 0.472506000  |
| 6  | 3.172538000  | 2.395494000  | -0.511532000 |
| 1  | 3.500953000  | 2.667777000  | -1.512568000 |
| 6  | 2.011161000  | 1.645515000  | -0.330039000 |
| 6  | -1.056765000 | 1.398705000  | 1.386415000  |
| 6  | -0.973585000 | 2.386844000  | 2.382816000  |
| 1  | -0.016692000 | 2.562685000  | 2.871848000  |
| 6  | -2.078914000 | 3.125453000  | 2.784962000  |
| 1  | -1.979058000 | 3.864974000  | 3.575575000  |
| 6  | -3.311166000 | 2.925580000  | 2.168620000  |
| 1  | -4.179075000 | 3.507207000  | 2.468379000  |
| 6  | -3.419849000 | 2.008407000  | 1.131537000  |
| 1  | -4.362717000 | 1.900780000  | 0.599864000  |
| 6  | -2.307537000 | 1.254301000  | 0.760139000  |
| 6  | 0.011784000  | -1.056073000 | 1.449505000  |
| 6  | -0.946479000 | -1.343761000 | 2.459785000  |
| 1  | -1.478703000 | -0.510281000 | 2.912052000  |
| 6  | -1.193893000 | -2.618550000 | 2.930498000  |
| 1  | -1.906834000 | -2.765513000 | 3.738203000  |
| 6  | -0.548489000 | -3.715090000 | 2.355909000  |
| 1  | -0.753457000 | -4.723874000 | 2.704713000  |
| 6  | 0.361885000  | -3.509724000 | 1.337104000  |
| 1  | 0.873003000  | -4.350115000 | 0.875260000  |
| 6  | 0.669088000  | -2.208002000 | 0.898990000  |
| 16 | 1.853104000  | -2.104822000 | -0.442994000 |

|    |              |              |              |
|----|--------------|--------------|--------------|
| 16 | 1.109894000  | 1.045891000  | -1.756420000 |
| 16 | -2.398596000 | 0.269774000  | -0.733946000 |
| 23 | -0.224834000 | -0.891529000 | -0.966281000 |
| 6  | 0.299580000  | 2.571463000  | -2.472543000 |
| 1  | 1.162771000  | 3.131469000  | -2.853166000 |
| 6  | -3.901250000 | -0.812276000 | -0.509047000 |
| 1  | -4.721553000 | -0.088563000 | -0.438275000 |
| 6  | 3.431503000  | -1.419064000 | 0.299260000  |
| 1  | 3.160056000  | -0.512033000 | 0.837847000  |
| 6  | 4.339524000  | -1.097932000 | -0.869693000 |
| 1  | 5.279087000  | -0.680323000 | -0.495502000 |
| 1  | 4.587939000  | -1.992029000 | -1.449710000 |
| 1  | 3.898727000  | -0.362810000 | -1.548051000 |
| 6  | 3.996453000  | -2.452609000 | 1.248174000  |
| 1  | 4.234111000  | -3.390116000 | 0.737103000  |
| 1  | 4.924048000  | -2.072585000 | 1.688542000  |
| 1  | 3.312572000  | -2.676671000 | 2.071175000  |
| 6  | -0.562073000 | 2.106664000  | -3.628842000 |
| 1  | 0.000058000  | 1.515166000  | -4.356379000 |
| 1  | -1.408810000 | 1.508184000  | -3.277805000 |
| 1  | -0.971390000 | 2.973905000  | -4.154541000 |
| 6  | -0.444633000 | 3.394998000  | -1.448671000 |
| 1  | 0.164368000  | 3.622011000  | -0.569551000 |
| 1  | -0.739361000 | 4.348812000  | -1.898352000 |
| 1  | -1.356862000 | 2.896670000  | -1.113578000 |
| 6  | -4.063413000 | -1.638896000 | -1.768211000 |
| 1  | -5.033840000 | -2.142326000 | -1.755026000 |
| 1  | -4.018913000 | -1.038570000 | -2.680943000 |
| 1  | -3.305707000 | -2.428044000 | -1.820522000 |
| 6  | -3.823536000 | -1.655697000 | 0.739453000  |
| 1  | -2.996499000 | -2.370629000 | 0.681134000  |
| 1  | -3.691236000 | -1.052634000 | 1.641155000  |
| 1  | -4.749495000 | -2.228166000 | 0.856574000  |
| 5  | 0.196646000  | 0.478039000  | 1.103260000  |
| 7  | -0.541175000 | -2.481257000 | -3.670072000 |
| 7  | -0.522131000 | -1.775124000 | -2.476751000 |
| 1  | -0.350141000 | -1.801303000 | -4.424342000 |
| 1  | -1.537976000 | -2.117235000 | -2.876866000 |

**TS5** (Quintet, TE= -3322.165373)

|   |              |             |              |
|---|--------------|-------------|--------------|
| 6 | -1.438068000 | 1.320105000 | -0.974874000 |
| 6 | -2.173462000 | 1.723486000 | -2.101060000 |
| 1 | -1.853701000 | 1.397954000 | -3.090727000 |
| 6 | -3.308535000 | 2.519206000 | -1.984048000 |
| 1 | -3.855698000 | 2.815312000 | -2.875909000 |
| 6 | -3.752250000 | 2.930208000 | -0.729313000 |

|    |              |              |              |
|----|--------------|--------------|--------------|
| 1  | -4.642951000 | 3.545856000  | -0.635030000 |
| 6  | -3.063020000 | 2.530537000  | 0.408851000  |
| 1  | -3.418791000 | 2.812868000  | 1.397726000  |
| 6  | -1.919654000 | 1.744200000  | 0.271023000  |
| 6  | 1.220034000  | 1.331071000  | -1.385355000 |
| 6  | 1.229949000  | 2.295421000  | -2.407625000 |
| 1  | 0.300410000  | 2.517340000  | -2.930185000 |
| 6  | 2.390683000  | 2.953348000  | -2.794445000 |
| 1  | 2.360276000  | 3.677425000  | -3.604969000 |
| 6  | 3.589846000  | 2.691414000  | -2.137821000 |
| 1  | 4.501501000  | 3.208631000  | -2.425732000 |
| 6  | 3.609508000  | 1.796855000  | -1.075612000 |
| 1  | 4.527594000  | 1.645823000  | -0.511811000 |
| 6  | 2.442078000  | 1.123461000  | -0.717434000 |
| 6  | -0.006448000 | -1.047374000 | -1.460018000 |
| 6  | 0.952929000  | -1.395866000 | -2.451746000 |
| 1  | 1.542702000  | -0.595368000 | -2.892152000 |
| 6  | 1.133356000  | -2.681631000 | -2.920641000 |
| 1  | 1.851987000  | -2.868815000 | -3.714822000 |
| 6  | 0.409607000  | -3.739325000 | -2.365396000 |
| 1  | 0.558438000  | -4.757601000 | -2.714914000 |
| 6  | -0.505474000 | -3.480501000 | -1.364570000 |
| 1  | -1.077194000 | -4.289354000 | -0.917545000 |
| 6  | -0.739887000 | -2.162821000 | -0.925168000 |
| 16 | -1.935366000 | -2.009394000 | 0.404474000  |
| 16 | -1.098563000 | 1.124812000  | 1.738329000  |
| 16 | 2.437230000  | 0.179908000  | 0.809082000  |
| 23 | 0.171268000  | -0.839823000 | 0.911183000  |
| 6  | -0.224176000 | 2.614381000  | 2.454217000  |
| 1  | -1.062327000 | 3.231947000  | 2.800091000  |
| 6  | 3.832497000  | -1.045220000 | 0.660226000  |
| 1  | 4.699028000  | -0.422275000 | 0.409158000  |
| 6  | -3.480100000 | -1.240831000 | -0.326309000 |
| 1  | -3.157168000 | -0.343043000 | -0.853371000 |
| 6  | -4.368425000 | -0.883187000 | 0.846871000  |
| 1  | -5.283354000 | -0.409721000 | 0.478269000  |
| 1  | -4.667255000 | -1.768785000 | 1.416392000  |
| 1  | -3.887174000 | -0.179747000 | 1.531952000  |
| 6  | -4.097553000 | -2.230519000 | -1.288249000 |
| 1  | -4.388248000 | -3.159379000 | -0.788946000 |
| 1  | -5.000668000 | -1.794853000 | -1.727792000 |
| 1  | -3.423077000 | -2.481810000 | -2.111058000 |
| 6  | 0.575302000  | 2.115766000  | 3.640959000  |
| 1  | -0.043499000 | 1.577918000  | 4.364417000  |
| 1  | 1.388856000  | 1.455616000  | 3.322864000  |
| 1  | 1.029607000  | 2.963091000  | 4.162137000  |

|   |              |              |              |
|---|--------------|--------------|--------------|
| 6 | 0.597446000  | 3.370727000  | 1.437883000  |
| 1 | 0.028024000  | 3.618966000  | 0.538252000  |
| 1 | 0.939968000  | 4.312296000  | 1.879408000  |
| 1 | 1.485083000  | 2.809982000  | 1.136817000  |
| 6 | 4.019493000  | -1.665736000 | 2.030081000  |
| 1 | 4.875773000  | -2.345636000 | 2.008314000  |
| 1 | 4.208400000  | -0.916965000 | 2.803053000  |
| 1 | 3.141825000  | -2.247482000 | 2.325269000  |
| 6 | 3.578438000  | -2.061753000 | -0.426152000 |
| 1 | 2.675952000  | -2.648362000 | -0.216450000 |
| 1 | 3.462652000  | -1.595510000 | -1.406886000 |
| 1 | 4.419031000  | -2.760922000 | -0.487169000 |
| 5 | -0.096743000 | 0.497830000  | -1.111574000 |
| 7 | -0.298854000 | -2.446567000 | 3.459931000  |
| 7 | 0.510447000  | -1.872185000 | 2.557595000  |
| 1 | -1.319785000 | -2.326405000 | 3.285905000  |
| 1 | 0.669671000  | -1.898713000 | 3.807618000  |

Cartesian coordinates of TS involved in the conversion of  $[6]_{\text{alt}} \rightarrow [6]_{\text{dis}}$  for the catalysts  $[1c''_{\text{PB}}]$  and  $[1f''_{\text{SB}}]$ , along with their total energies (in hartree) including zero point vibrational correction at M06-L-D3(heptane)/6-311+G\* level of theory.

For catalyst  $[1c''_{\text{PB}}]$

**TS6** (Quartet, TE= -3507.183455)

|   |              |              |             |
|---|--------------|--------------|-------------|
| 6 | -1.472949000 | 0.548093000  | 1.899473000 |
| 6 | -1.647374000 | 1.338545000  | 3.050729000 |
| 1 | -0.763242000 | 1.707987000  | 3.570909000 |
| 6 | -2.902463000 | 1.672164000  | 3.547420000 |
| 1 | -2.988255000 | 2.291014000  | 4.438946000 |
| 6 | -4.045628000 | 1.216784000  | 2.899774000 |
| 1 | -5.034570000 | 1.471573000  | 3.274977000 |
| 6 | -3.911821000 | 0.446157000  | 1.750866000 |
| 1 | -4.810067000 | 0.117753000  | 1.233871000 |
| 6 | -2.649755000 | 0.119983000  | 1.242467000 |
| 6 | 0.605727000  | -1.235144000 | 1.987996000 |
| 6 | 0.228287000  | -1.719090000 | 3.251938000 |
| 1 | -0.564049000 | -1.203628000 | 3.796663000 |
| 6 | 0.833169000  | -2.828879000 | 3.832428000 |
| 1 | 0.506586000  | -3.177609000 | 4.810854000 |
| 6 | 1.861501000  | -3.488038000 | 3.166055000 |
| 1 | 2.346525000  | -4.352560000 | 3.614458000 |
| 6 | 2.255239000  | -3.038633000 | 1.909521000 |
| 1 | 3.048806000  | -3.565840000 | 1.382978000 |
| 6 | 1.629840000  | -1.941199000 | 1.310797000 |
| 6 | 1.082742000  | 1.351377000  | 1.634825000 |

|    |              |              |              |
|----|--------------|--------------|--------------|
| 6  | 1.839597000  | 1.423274000  | 2.818803000  |
| 1  | 1.718046000  | 0.638951000  | 3.567053000  |
| 6  | 2.753445000  | 2.441698000  | 3.058047000  |
| 1  | 3.322957000  | 2.456658000  | 3.985826000  |
| 6  | 2.955754000  | 3.428316000  | 2.097751000  |
| 1  | 3.685475000  | 4.218731000  | 2.260770000  |
| 6  | 2.224845000  | 3.387000000  | 0.917553000  |
| 1  | 2.408702000  | 4.148209000  | 0.163144000  |
| 6  | 1.289128000  | 2.371753000  | 0.683806000  |
| 23 | -0.123313000 | -0.262160000 | -1.182489000 |
| 6  | -2.975071000 | -2.492644000 | -0.031118000 |
| 1  | -4.021661000 | -2.430397000 | 0.300696000  |
| 6  | 3.739765000  | -0.879350000 | -0.482315000 |
| 1  | 4.328091000  | -1.777490000 | -0.249033000 |
| 6  | -0.928057000 | 3.578970000  | -0.886927000 |
| 1  | -0.768269000 | 4.117559000  | -1.829276000 |
| 6  | -0.778962000 | 4.561565000  | 0.265334000  |
| 1  | -1.549310000 | 5.338393000  | 0.200625000  |
| 1  | -0.898382000 | 4.061602000  | 1.232785000  |
| 1  | 0.191882000  | 5.062645000  | 0.281929000  |
| 6  | -2.332640000 | 3.002289000  | -0.922424000 |
| 1  | -2.560824000 | 2.439796000  | -0.011560000 |
| 1  | -3.076532000 | 3.803118000  | -1.006151000 |
| 1  | -2.471193000 | 2.331649000  | -1.774145000 |
| 6  | -2.911164000 | -3.328801000 | -1.303395000 |
| 1  | -3.541394000 | -2.939330000 | -2.106865000 |
| 1  | -1.892382000 | -3.388063000 | -1.696930000 |
| 1  | -3.235634000 | -4.356812000 | -1.108513000 |
| 6  | -2.158687000 | -3.111971000 | 1.092229000  |
| 1  | -2.245768000 | -2.544948000 | 2.023066000  |
| 1  | -2.497959000 | -4.134607000 | 1.291624000  |
| 1  | -1.093451000 | -3.162162000 | 0.848602000  |
| 6  | 4.064616000  | -0.419980000 | -1.898884000 |
| 1  | 5.135420000  | -0.216451000 | -2.009664000 |
| 1  | 3.786884000  | -1.148474000 | -2.667263000 |
| 1  | 3.531717000  | 0.507847000  | -2.133843000 |
| 6  | 4.093713000  | 0.186119000  | 0.538013000  |
| 1  | 3.568636000  | 1.125296000  | 0.344761000  |
| 1  | 3.851624000  | -0.119361000 | 1.559220000  |
| 1  | 5.167961000  | 0.400784000  | 0.500857000  |
| 5  | 0.022436000  | 0.162523000  | 1.486514000  |
| 7  | 0.093189000  | -1.744140000 | -3.996088000 |
| 7  | -0.077621000 | -0.963829000 | -2.804470000 |
| 15 | 0.383167000  | 2.212942000  | -0.898089000 |
| 15 | -2.453016000 | -0.727761000 | -0.369169000 |
| 15 | 1.958074000  | -1.438717000 | -0.419661000 |

|   |              |              |              |
|---|--------------|--------------|--------------|
| 6 | 1.618679000  | 2.828931000  | -2.181885000 |
| 1 | 2.583413000  | 2.516937000  | -1.754301000 |
| 6 | 1.664241000  | 4.334894000  | -2.427528000 |
| 1 | 2.575591000  | 4.597640000  | -2.975578000 |
| 1 | 0.825829000  | 4.666022000  | -3.048271000 |
| 1 | 1.647416000  | 4.939731000  | -1.517849000 |
| 6 | 1.414709000  | 2.098275000  | -3.505044000 |
| 1 | 1.508426000  | 1.014373000  | -3.402486000 |
| 1 | 0.416413000  | 2.293743000  | -3.917587000 |
| 1 | 2.143224000  | 2.437048000  | -4.250488000 |
| 6 | 2.062338000  | -3.013745000 | -1.447866000 |
| 1 | 1.882525000  | -2.628324000 | -2.461497000 |
| 6 | 0.902019000  | -3.938746000 | -1.118833000 |
| 1 | -0.044360000 | -3.396099000 | -1.109375000 |
| 1 | 0.818385000  | -4.734219000 | -1.866881000 |
| 1 | 1.017948000  | -4.412934000 | -0.138026000 |
| 6 | 3.375426000  | -3.787172000 | -1.458510000 |
| 1 | 3.277186000  | -4.653358000 | -2.122716000 |
| 1 | 4.222191000  | -3.204851000 | -1.828837000 |
| 1 | 3.649077000  | -4.180859000 | -0.474625000 |
| 6 | -3.885310000 | -0.086741000 | -1.426611000 |
| 1 | -4.010630000 | 0.940860000  | -1.062774000 |
| 6 | -5.233336000 | -0.789554000 | -1.290835000 |
| 1 | -5.994146000 | -0.234744000 | -1.851295000 |
| 1 | -5.220007000 | -1.801610000 | -1.704150000 |
| 1 | -5.591913000 | -0.867459000 | -0.262427000 |
| 6 | -3.478871000 | -0.023715000 | -2.896592000 |
| 1 | -2.530534000 | 0.501155000  | -3.048492000 |
| 1 | -3.357591000 | -1.024587000 | -3.327328000 |
| 1 | -4.248154000 | 0.484028000  | -3.489214000 |
| 1 | -0.892099000 | -1.697333000 | -3.099760000 |
| 1 | -0.069036000 | -1.077825000 | -4.767380000 |

**TS6** (Sextet, TE= -3507.149524)

|   |              |              |             |
|---|--------------|--------------|-------------|
| 6 | -1.442640000 | 0.286110000  | 1.985900000 |
| 6 | -1.607315000 | 0.914555000  | 3.235184000 |
| 1 | -0.721316000 | 1.267248000  | 3.763831000 |
| 6 | -2.852853000 | 1.109470000  | 3.820312000 |
| 1 | -2.929046000 | 1.602971000  | 4.787804000 |
| 6 | -4.000334000 | 0.676947000  | 3.163401000 |
| 1 | -4.983007000 | 0.824062000  | 3.606812000 |
| 6 | -3.877663000 | 0.065695000  | 1.922028000 |
| 1 | -4.779764000 | -0.252922000 | 1.403229000 |
| 6 | -2.623829000 | -0.124357000 | 1.329043000 |
| 6 | 0.796718000  | -1.285181000 | 1.885210000 |
| 6 | 0.496880000  | -1.879096000 | 3.124117000 |

|    |              |              |              |
|----|--------------|--------------|--------------|
| 1  | -0.360664000 | -1.509757000 | 3.687717000  |
| 6  | 1.267914000  | -2.901596000 | 3.666260000  |
| 1  | 0.999838000  | -3.333163000 | 4.629426000  |
| 6  | 2.395769000  | -3.355056000 | 2.989022000  |
| 1  | 3.021138000  | -4.136958000 | 3.414874000  |
| 6  | 2.705406000  | -2.808593000 | 1.747953000  |
| 1  | 3.578344000  | -3.176368000 | 1.212766000  |
| 6  | 1.906992000  | -1.811958000 | 1.178363000  |
| 6  | 1.009252000  | 1.340518000  | 1.638525000  |
| 6  | 1.795023000  | 1.421770000  | 2.804057000  |
| 1  | 1.778587000  | 0.586975000  | 3.505952000  |
| 6  | 2.606679000  | 2.513658000  | 3.083749000  |
| 1  | 3.202353000  | 2.530607000  | 3.995103000  |
| 6  | 2.667601000  | 3.578213000  | 2.189529000  |
| 1  | 3.307977000  | 4.434816000  | 2.389512000  |
| 6  | 1.909091000  | 3.530467000  | 1.027452000  |
| 1  | 1.972773000  | 4.357922000  | 0.326365000  |
| 6  | 1.087285000  | 2.431590000  | 0.745252000  |
| 23 | -0.155912000 | -0.252583000 | -1.151833000 |
| 6  | -2.866724000 | -2.630337000 | -0.120628000 |
| 1  | -3.906838000 | -2.678156000 | 0.231198000  |
| 6  | 3.863764000  | -0.566684000 | -0.663676000 |
| 1  | 4.535632000  | -1.388564000 | -0.377372000 |
| 6  | -1.164682000 | 3.548381000  | -0.824031000 |
| 1  | -1.344422000 | 3.747690000  | -1.892635000 |
| 6  | -0.819258000 | 4.853755000  | -0.118761000 |
| 1  | -1.659001000 | 5.553281000  | -0.201412000 |
| 1  | -0.645115000 | 4.685790000  | 0.948582000  |
| 1  | 0.060284000  | 5.358075000  | -0.519253000 |
| 6  | -2.436977000 | 2.974209000  | -0.221812000 |
| 1  | -2.307392000 | 2.734246000  | 0.838894000  |
| 1  | -3.261851000 | 3.691781000  | -0.296676000 |
| 1  | -2.741303000 | 2.058326000  | -0.726482000 |
| 6  | -2.751776000 | -3.379532000 | -1.441434000 |
| 1  | -3.382100000 | -2.957677000 | -2.231232000 |
| 1  | -1.721727000 | -3.368150000 | -1.811414000 |
| 1  | -3.041496000 | -4.429697000 | -1.324481000 |
| 6  | -1.974485000 | -3.248324000 | 0.945396000  |
| 1  | -2.094619000 | -2.760350000 | 1.916413000  |
| 1  | -2.211636000 | -4.310463000 | 1.073932000  |
| 1  | -0.913942000 | -3.178714000 | 0.684076000  |
| 6  | 4.152351000  | -0.162435000 | -2.104733000 |
| 1  | 5.179422000  | 0.204079000  | -2.209758000 |
| 1  | 4.023206000  | -0.982080000 | -2.817623000 |
| 1  | 3.484372000  | 0.644391000  | -2.426407000 |
| 6  | 4.101959000  | 0.587199000  | 0.293699000  |

|    |              |              |              |
|----|--------------|--------------|--------------|
| 1  | 3.466122000  | 1.447486000  | 0.064101000  |
| 1  | 3.905754000  | 0.309905000  | 1.332435000  |
| 1  | 5.142522000  | 0.925253000  | 0.229468000  |
| 5  | 0.054496000  | 0.062464000  | 1.463799000  |
| 7  | -0.910262000 | -1.605597000 | -3.921490000 |
| 7  | -0.044298000 | -1.131671000 | -2.941720000 |
| 15 | 0.192981000  | 2.248096000  | -0.837511000 |
| 15 | -2.479709000 | -0.814348000 | -0.362721000 |
| 15 | 2.133506000  | -1.261589000 | -0.555308000 |
| 6  | 1.375317000  | 2.837977000  | -2.180078000 |
| 1  | 2.345961000  | 2.446317000  | -1.839996000 |
| 6  | 1.517148000  | 4.335689000  | -2.421936000 |
| 1  | 2.220022000  | 4.508526000  | -3.244721000 |
| 1  | 0.568518000  | 4.793137000  | -2.721226000 |
| 1  | 1.898183000  | 4.889716000  | -1.562646000 |
| 6  | 1.007045000  | 2.146838000  | -3.491246000 |
| 1  | 1.022475000  | 1.056117000  | -3.416412000 |
| 1  | 0.001626000  | 2.431442000  | -3.826802000 |
| 1  | 1.700872000  | 2.437707000  | -4.288040000 |
| 6  | 2.336806000  | -2.847073000 | -1.560419000 |
| 1  | 2.157741000  | -2.473279000 | -2.578621000 |
| 6  | 1.223700000  | -3.830721000 | -1.228531000 |
| 1  | 0.240981000  | -3.354275000 | -1.256152000 |
| 1  | 1.211240000  | -4.662229000 | -1.942461000 |
| 1  | 1.348329000  | -4.259333000 | -0.228117000 |
| 6  | 3.686194000  | -3.555200000 | -1.555291000 |
| 1  | 3.659917000  | -4.391262000 | -2.263971000 |
| 1  | 4.518882000  | -2.916130000 | -1.856700000 |
| 1  | 3.933177000  | -3.986714000 | -0.581475000 |
| 6  | -4.035736000 | -0.157915000 | -1.231944000 |
| 1  | -4.254620000 | 0.760136000  | -0.672277000 |
| 6  | -5.288773000 | -1.024729000 | -1.182254000 |
| 1  | -6.126431000 | -0.492001000 | -1.646603000 |
| 1  | -5.171926000 | -1.962199000 | -1.733469000 |
| 1  | -5.600598000 | -1.283468000 | -0.167412000 |
| 6  | -3.719969000 | 0.234042000  | -2.671265000 |
| 1  | -2.795677000 | 0.818747000  | -2.755400000 |
| 1  | -3.598035000 | -0.648452000 | -3.310325000 |
| 1  | -4.534413000 | 0.824725000  | -3.105294000 |
| 1  | 0.092120000  | -2.148681000 | -3.647130000 |
| 1  | -1.872969000 | -1.724645000 | -3.552247000 |

For catalyst [**1f'**<sub>SB</sub>]

**TS6** (Quartet, TE= -3322.331928)

|   |              |             |              |
|---|--------------|-------------|--------------|
| 6 | -1.167712000 | 1.273671000 | -1.094423000 |
| 6 | -1.989217000 | 1.378595000 | -2.232413000 |



|    |              |              |              |
|----|--------------|--------------|--------------|
| 1  | -1.885671000 | 0.631788000  | -3.020693000 |
| 6  | -2.930478000 | 2.391016000  | -2.382735000 |
| 1  | -3.542877000 | 2.434280000  | -3.281415000 |
| 6  | -3.101142000 | 3.339756000  | -1.377742000 |
| 1  | -3.845109000 | 4.126564000  | -1.479545000 |
| 6  | -2.331894000 | 3.254158000  | -0.223794000 |
| 1  | -2.482895000 | 3.959989000  | 0.591193000  |
| 6  | -1.379703000 | 2.240895000  | -0.096967000 |
| 6  | 1.380502000  | 0.534339000  | -1.572399000 |
| 6  | 1.483785000  | 1.168834000  | -2.823887000 |
| 1  | 0.567111000  | 1.418236000  | -3.359678000 |
| 6  | 2.706108000  | 1.489471000  | -3.402383000 |
| 1  | 2.735491000  | 1.978357000  | -4.374324000 |
| 6  | 3.891933000  | 1.193455000  | -2.735277000 |
| 1  | 4.853818000  | 1.448156000  | -3.174294000 |
| 6  | 3.834228000  | 0.597312000  | -1.482555000 |
| 1  | 4.748096000  | 0.402381000  | -0.924102000 |
| 6  | 2.596657000  | 0.275458000  | -0.921089000 |
| 6  | -0.582663000 | -1.319827000 | -1.486178000 |
| 6  | -0.219629000 | -1.866414000 | -2.728926000 |
| 1  | 0.464632000  | -1.306239000 | -3.366973000 |
| 6  | -0.687776000 | -3.101996000 | -3.165963000 |
| 1  | -0.373108000 | -3.489618000 | -4.133286000 |
| 6  | -1.545023000 | -3.847813000 | -2.364106000 |
| 1  | -1.903102000 | -4.821664000 | -2.690051000 |
| 6  | -1.925141000 | -3.345201000 | -1.123102000 |
| 1  | -2.568680000 | -3.926157000 | -0.465529000 |
| 6  | -1.454854000 | -2.101780000 | -0.703157000 |
| 16 | -1.847972000 | -1.573215000 | 0.969264000  |
| 16 | -0.526685000 | 2.066403000  | 1.468032000  |
| 16 | 2.591651000  | -0.341414000 | 0.765498000  |
| 23 | 0.243762000  | -0.308419000 | 1.528259000  |
| 6  | 0.723833000  | 3.458068000  | 1.456411000  |
| 1  | 0.104209000  | 4.359167000  | 1.546304000  |
| 6  | 3.171095000  | -2.111637000 | 0.552563000  |
| 1  | 4.171236000  | -1.994338000 | 0.115672000  |
| 6  | -3.409550000 | -0.566617000 | 0.742024000  |
| 1  | -3.166423000 | 0.205193000  | 0.006848000  |
| 6  | -3.723115000 | 0.067387000  | 2.081631000  |
| 1  | -4.612408000 | 0.700264000  | 1.995190000  |
| 1  | -3.929771000 | -0.688392000 | 2.846580000  |
| 1  | -2.903949000 | 0.695703000  | 2.443450000  |
| 6  | -4.525386000 | -1.445736000 | 0.222358000  |
| 1  | -4.755956000 | -2.258733000 | 0.918686000  |
| 1  | -5.436945000 | -0.852575000 | 0.089716000  |
| 1  | -4.281083000 | -1.888484000 | -0.746841000 |

|   |              |              |              |
|---|--------------|--------------|--------------|
| 6 | 1.568563000  | 3.282788000  | 2.701820000  |
| 1 | 0.966800000  | 3.257156000  | 3.614226000  |
| 1 | 2.147749000  | 2.353580000  | 2.654464000  |
| 1 | 2.280215000  | 4.109200000  | 2.793088000  |
| 6 | 1.544419000  | 3.513489000  | 0.189910000  |
| 1 | 0.924599000  | 3.528380000  | -0.710783000 |
| 1 | 2.156342000  | 4.422574000  | 0.187030000  |
| 1 | 2.222272000  | 2.659771000  | 0.114726000  |
| 6 | 3.268159000  | -2.727020000 | 1.932748000  |
| 1 | 3.718123000  | -3.722301000 | 1.862422000  |
| 1 | 3.885757000  | -2.133295000 | 2.613189000  |
| 1 | 2.279296000  | -2.847363000 | 2.385527000  |
| 6 | 2.277311000  | -2.894446000 | -0.379125000 |
| 1 | 1.267968000  | -2.998269000 | 0.034063000  |
| 1 | 2.189720000  | -2.424850000 | -1.361932000 |
| 1 | 2.682941000  | -3.902037000 | -0.524432000 |
| 5 | -0.066799000 | 0.117116000  | -1.042302000 |
| 7 | 0.499195000  | -1.991211000 | 4.225564000  |
| 7 | 0.390635000  | -1.088218000 | 3.117176000  |
| 1 | 0.137196000  | -1.453596000 | 5.029293000  |
| 1 | 1.371263000  | -1.128359000 | 3.690412000  |

**TS6** (Sextet, TE= -3322.304097)

|   |              |              |              |
|---|--------------|--------------|--------------|
| 6 | -1.377845000 | 1.168898000  | -0.952573000 |
| 6 | -2.219656000 | 1.292568000  | -2.072820000 |
| 1 | -2.031434000 | 0.660931000  | -2.942008000 |
| 6 | -3.293745000 | 2.175935000  | -2.101994000 |
| 1 | -3.922429000 | 2.238577000  | -2.988198000 |
| 6 | -3.575957000 | 2.967593000  | -0.991233000 |
| 1 | -4.422210000 | 3.650886000  | -0.999731000 |
| 6 | -2.783350000 | 2.855883000  | 0.144714000  |
| 1 | -3.017173000 | 3.434603000  | 1.037019000  |
| 6 | -1.700015000 | 1.975516000  | 0.149850000  |
| 6 | 1.205713000  | 0.837031000  | -1.584994000 |
| 6 | 1.161520000  | 1.448384000  | -2.852397000 |
| 1 | 0.209121000  | 1.480427000  | -3.382116000 |
| 6 | 2.280111000  | 2.005120000  | -3.459009000 |
| 1 | 2.195076000  | 2.459645000  | -4.444187000 |
| 6 | 3.507303000  | 1.989347000  | -2.800685000 |
| 1 | 4.388721000  | 2.432912000  | -3.258233000 |
| 6 | 3.588652000  | 1.427976000  | -1.534469000 |
| 1 | 4.528559000  | 1.451372000  | -0.985297000 |
| 6 | 2.456216000  | 0.855911000  | -0.948267000 |
| 6 | -0.404071000 | -1.340479000 | -1.365421000 |
| 6 | 0.219068000  | -1.925952000 | -2.487783000 |
| 1 | 0.910398000  | -1.318307000 | -3.071547000 |

|    |              |              |              |
|----|--------------|--------------|--------------|
| 6  | -0.013360000 | -3.239076000 | -2.879143000 |
| 1  | 0.493163000  | -3.639962000 | -3.755484000 |
| 6  | -0.888107000 | -4.041050000 | -2.153271000 |
| 1  | -1.071107000 | -5.072358000 | -2.446035000 |
| 6  | -1.513271000 | -3.513129000 | -1.026752000 |
| 1  | -2.170248000 | -4.134216000 | -0.421069000 |
| 6  | -1.282558000 | -2.192459000 | -0.644931000 |
| 16 | -1.944674000 | -1.673124000 | 0.944051000  |
| 16 | -0.789407000 | 1.734462000  | 1.677826000  |
| 16 | 2.627906000  | 0.278057000  | 0.750850000  |
| 23 | 0.351406000  | -0.467162000 | 1.351506000  |
| 6  | 0.177945000  | 3.321727000  | 1.856316000  |
| 1  | -0.592230000 | 4.074166000  | 2.068068000  |
| 6  | 3.750466000  | -1.196072000 | 0.515957000  |
| 1  | 4.587111000  | -0.791468000 | -0.067613000 |
| 6  | -3.574843000 | -0.868696000 | 0.537651000  |
| 1  | -3.364713000 | -0.089062000 | -0.197276000 |
| 6  | -4.086776000 | -0.246808000 | 1.821430000  |
| 1  | -5.037371000 | 0.263491000  | 1.634686000  |
| 1  | -4.265454000 | -1.002608000 | 2.593642000  |
| 1  | -3.388395000 | 0.491091000  | 2.226309000  |
| 6  | -4.523476000 | -1.890199000 | -0.051429000 |
| 1  | -4.731340000 | -2.702509000 | 0.652785000  |
| 1  | -5.477894000 | -1.413520000 | -0.301959000 |
| 1  | -4.128113000 | -2.332506000 | -0.969952000 |
| 6  | 1.075587000  | 3.147057000  | 3.064416000  |
| 1  | 0.513868000  | 2.894191000  | 3.967500000  |
| 1  | 1.813632000  | 2.355943000  | 2.893385000  |
| 1  | 1.625414000  | 4.072811000  | 3.260885000  |
| 6  | 0.936075000  | 3.693548000  | 0.603102000  |
| 1  | 0.293547000  | 3.725972000  | -0.281024000 |
| 1  | 1.384738000  | 4.685929000  | 0.724004000  |
| 1  | 1.746039000  | 2.988612000  | 0.402298000  |
| 6  | 4.238047000  | -1.621919000 | 1.885026000  |
| 1  | 4.904381000  | -2.485525000 | 1.790839000  |
| 1  | 4.794679000  | -0.824688000 | 2.384492000  |
| 1  | 3.413876000  | -1.918714000 | 2.540078000  |
| 6  | 3.055124000  | -2.287191000 | -0.267429000 |
| 1  | 2.138340000  | -2.618846000 | 0.233318000  |
| 1  | 2.767163000  | -1.945557000 | -1.265399000 |
| 1  | 3.717584000  | -3.151820000 | -0.388138000 |
| 5  | -0.130879000 | 0.176742000  | -1.009165000 |
| 7  | 1.451104000  | -3.203538000 | 2.846957000  |
| 7  | 0.664901000  | -2.144741000 | 2.346753000  |
| 1  | 1.900424000  | -3.689228000 | 2.049211000  |
| 1  | 0.264297000  | -3.158802000 | 2.925152000  |

Cartesian coordinates of TS involved in the conversion of [7]<sub>alt</sub>→[7]<sub>dis</sub> for the catalysts [1c''<sub>PB</sub>] and [1f''<sub>SB</sub>], along with their total energies (in hartree) including zero point vibrational correction at M06-L-D3(heptane)/6-311+G\* level of theory.

For catalyst [1c''<sub>PB</sub>]

TS7 (Quartet, TE= -3507.617766)

|    |              |              |              |
|----|--------------|--------------|--------------|
| 6  | -1.314168000 | 0.871666000  | 1.912904000  |
| 6  | -1.349449000 | 1.756335000  | 3.005667000  |
| 1  | -0.411236000 | 2.064046000  | 3.466464000  |
| 6  | -2.542556000 | 2.249713000  | 3.521304000  |
| 1  | -2.527106000 | 2.933339000  | 4.367315000  |
| 6  | -3.751258000 | 1.872773000  | 2.948347000  |
| 1  | -4.691662000 | 2.253035000  | 3.339833000  |
| 6  | -3.748472000 | 1.021976000  | 1.849301000  |
| 1  | -4.697381000 | 0.763281000  | 1.387971000  |
| 6  | -2.550224000 | 0.527594000  | 1.325158000  |
| 6  | 0.457137000  | -1.200490000 | 2.046462000  |
| 6  | 0.033643000  | -1.563514000 | 3.335205000  |
| 1  | -0.662646000 | -0.913566000 | 3.865651000  |
| 6  | 0.485198000  | -2.721458000 | 3.959378000  |
| 1  | 0.134987000  | -2.971706000 | 4.958511000  |
| 6  | 1.386516000  | -3.555910000 | 3.307495000  |
| 1  | 1.749058000  | -4.460512000 | 3.789637000  |
| 6  | 1.812829000  | -3.231538000 | 2.023890000  |
| 1  | 2.506959000  | -3.895600000 | 1.513663000  |
| 6  | 1.349602000  | -2.076901000 | 1.387601000  |
| 6  | 1.326748000  | 1.270312000  | 1.567735000  |
| 6  | 2.108637000  | 1.292973000  | 2.736342000  |
| 1  | 1.899085000  | 0.571917000  | 3.526870000  |
| 6  | 3.151430000  | 2.193978000  | 2.908629000  |
| 1  | 3.734941000  | 2.182211000  | 3.826704000  |
| 6  | 3.463512000  | 3.091011000  | 1.892597000  |
| 1  | 4.293643000  | 3.784559000  | 2.003551000  |
| 6  | 2.713776000  | 3.086120000  | 0.723567000  |
| 1  | 2.985409000  | 3.773238000  | -0.073249000 |
| 6  | 1.642916000  | 2.199661000  | 0.559537000  |
| 23 | -0.179651000 | -0.297889000 | -1.280331000 |
| 6  | -3.235261000 | -2.085558000 | 0.153257000  |
| 1  | -4.254961000 | -1.874948000 | 0.504767000  |
| 6  | 3.573653000  | -1.365736000 | -0.455474000 |
| 1  | 4.026240000  | -2.334907000 | -0.206697000 |
| 6  | -0.441808000 | 3.626338000  | -1.013250000 |
| 1  | -0.243168000 | 4.091800000  | -1.986355000 |
| 6  | -0.122464000 | 4.633444000  | 0.081819000  |

|    |              |              |              |
|----|--------------|--------------|--------------|
| 1  | -0.777839000 | 5.505718000  | -0.011793000 |
| 1  | -0.285389000 | 4.206663000  | 1.077267000  |
| 1  | 0.907835000  | 4.994561000  | 0.049977000  |
| 6  | -1.910247000 | 3.241935000  | -0.981319000 |
| 1  | -2.183644000 | 2.768032000  | -0.034007000 |
| 1  | -2.541598000 | 4.129942000  | -1.092921000 |
| 1  | -2.165345000 | 2.556000000  | -1.792838000 |
| 6  | -3.319042000 | -2.944346000 | -1.103006000 |
| 1  | -3.919557000 | -2.491004000 | -1.895521000 |
| 1  | -2.326601000 | -3.133794000 | -1.519521000 |
| 1  | -3.765496000 | -3.917635000 | -0.875503000 |
| 6  | -2.485987000 | -2.786204000 | 1.275127000  |
| 1  | -2.481289000 | -2.194990000 | 2.194451000  |
| 1  | -2.958253000 | -3.747630000 | 1.502241000  |
| 1  | -1.442173000 | -2.987231000 | 1.016920000  |
| 6  | 3.938064000  | -0.997791000 | -1.888585000 |
| 1  | 5.024173000  | -0.934368000 | -2.008734000 |
| 1  | 3.570695000  | -1.716385000 | -2.628187000 |
| 1  | 3.525770000  | -0.019122000 | -2.156914000 |
| 6  | 4.104283000  | -0.347972000 | 0.536134000  |
| 1  | 3.750879000  | 0.662736000  | 0.319907000  |
| 1  | 3.824242000  | -0.585549000 | 1.565137000  |
| 1  | 5.198209000  | -0.324890000 | 0.489143000  |
| 5  | 0.102513000  | 0.261560000  | 1.546110000  |
| 7  | -0.761557000 | -1.962557000 | -4.011468000 |
| 7  | -0.355108000 | -1.138417000 | -2.841792000 |
| 1  | -1.062322000 | -2.902363000 | -3.759879000 |
| 15 | 0.682733000  | 2.108856000  | -0.993143000 |
| 15 | -2.505431000 | -0.413839000 | -0.240727000 |
| 15 | 1.738257000  | -1.688447000 | -0.352325000 |
| 6  | 1.958744000  | 2.501873000  | -2.322495000 |
| 1  | 2.884903000  | 2.085108000  | -1.899935000 |
| 6  | 2.188249000  | 3.980132000  | -2.627116000 |
| 1  | 3.114288000  | 4.100651000  | -3.198289000 |
| 1  | 1.387156000  | 4.391674000  | -3.248210000 |
| 1  | 2.268051000  | 4.616486000  | -1.743454000 |
| 6  | 1.634657000  | 1.759245000  | -3.613592000 |
| 1  | 1.582034000  | 0.676298000  | -3.473356000 |
| 1  | 0.669001000  | 2.079412000  | -4.025291000 |
| 1  | 2.391250000  | 1.966432000  | -4.377919000 |
| 6  | 1.629341000  | -3.302658000 | -1.328460000 |
| 1  | 1.523633000  | -2.925227000 | -2.355687000 |
| 6  | 0.353695000  | -4.051222000 | -0.978424000 |
| 1  | -0.514472000 | -3.391287000 | -0.994490000 |
| 1  | 0.172066000  | -4.866277000 | -1.687702000 |
| 1  | 0.402755000  | -4.497812000 | 0.019638000  |

|   |              |              |              |
|---|--------------|--------------|--------------|
| 6 | 2.828933000  | -4.242824000 | -1.301050000 |
| 1 | 2.610982000  | -5.121372000 | -1.917900000 |
| 1 | 3.741788000  | -3.797788000 | -1.701505000 |
| 1 | 3.054325000  | -4.619232000 | -0.299701000 |
| 6 | -3.864122000 | 0.382632000  | -1.290620000 |
| 1 | -3.845431000 | 1.425555000  | -0.952196000 |
| 6 | -5.285032000 | -0.140257000 | -1.091287000 |
| 1 | -5.985256000 | 0.504807000  | -1.631827000 |
| 1 | -5.421418000 | -1.149010000 | -1.488767000 |
| 1 | -5.612289000 | -0.157383000 | -0.050740000 |
| 6 | -3.516688000 | 0.361109000  | -2.774986000 |
| 1 | -2.538337000 | 0.806213000  | -2.982695000 |
| 1 | -3.512064000 | -0.660891000 | -3.172570000 |
| 1 | -4.260174000 | 0.919264000  | -3.353144000 |
| 1 | -1.299942000 | -0.968380000 | -3.672480000 |
| 1 | -0.073327000 | -1.938875000 | -4.759598000 |

For catalyst [**1f'**<sub>SB</sub>]

**TS7** (Quartet, TE= -3322.770321)

|   |              |              |              |
|---|--------------|--------------|--------------|
| 6 | 1.486192000  | -0.963111000 | -1.218109000 |
| 6 | 2.342600000  | -0.821920000 | -2.323945000 |
| 1 | 2.115393000  | -0.064691000 | -3.074559000 |
| 6 | 3.463205000  | -1.627989000 | -2.492249000 |
| 1 | 4.098108000  | -1.497326000 | -3.365355000 |
| 6 | 3.781806000  | -2.589034000 | -1.537320000 |
| 1 | 4.664865000  | -3.211834000 | -1.654940000 |
| 6 | 2.984545000  | -2.724043000 | -0.406916000 |
| 1 | 3.252132000  | -3.432804000 | 0.373998000  |
| 6 | 1.850231000  | -1.924601000 | -0.264670000 |
| 6 | -1.174908000 | -0.781774000 | -1.679472000 |
| 6 | -1.156389000 | -1.489149000 | -2.893449000 |
| 1 | -0.201926000 | -1.653721000 | -3.393947000 |
| 6 | -2.321133000 | -1.970748000 | -3.480051000 |
| 1 | -2.270185000 | -2.506431000 | -4.424996000 |
| 6 | -3.549156000 | -1.780068000 | -2.853237000 |
| 1 | -4.461797000 | -2.166745000 | -3.299380000 |
| 6 | -3.600196000 | -1.125620000 | -1.628463000 |
| 1 | -4.545913000 | -1.021632000 | -1.100617000 |
| 6 | -2.425259000 | -0.629626000 | -1.064659000 |
| 6 | 0.314052000  | 1.443443000  | -1.490405000 |
| 6 | -0.084889000 | 1.941338000  | -2.740987000 |
| 1 | -0.577476000 | 1.269737000  | -3.444231000 |
| 6 | 0.128796000  | 3.266764000  | -3.106009000 |
| 1 | -0.190263000 | 3.616783000  | -4.085009000 |
| 6 | 0.731073000  | 4.147693000  | -2.214391000 |
| 1 | 0.883955000  | 5.189120000  | -2.485762000 |

|    |              |              |              |
|----|--------------|--------------|--------------|
| 6  | 1.118998000  | 3.694507000  | -0.957422000 |
| 1  | 1.561315000  | 4.378421000  | -0.236568000 |
| 6  | 0.923238000  | 2.357430000  | -0.616776000 |
| 16 | 1.318563000  | 1.847138000  | 1.055161000  |
| 16 | 0.952842000  | -1.987715000 | 1.280600000  |
| 16 | -2.492476000 | 0.034044000  | 0.595381000  |
| 23 | -0.309772000 | 0.098282000  | 1.726901000  |
| 6  | -0.012654000 | -3.590690000 | 1.226130000  |
| 1  | 0.770652000  | -4.353580000 | 1.308677000  |
| 6  | -3.393684000 | 1.665835000  | 0.438057000  |
| 1  | -4.412910000 | 1.363681000  | 0.168964000  |
| 6  | 3.088849000  | 1.230484000  | 0.958317000  |
| 1  | 3.065266000  | 0.369129000  | 0.284955000  |
| 6  | 3.467381000  | 0.795998000  | 2.359087000  |
| 1  | 4.476495000  | 0.373304000  | 2.352665000  |
| 1  | 3.469276000  | 1.639452000  | 3.056329000  |
| 1  | 2.794464000  | 0.029859000  | 2.755945000  |
| 6  | 3.986688000  | 2.308005000  | 0.396285000  |
| 1  | 3.986553000  | 3.205420000  | 1.022858000  |
| 1  | 5.015672000  | 1.937347000  | 0.350315000  |
| 1  | 3.700856000  | 2.597819000  | -0.617879000 |
| 6  | -0.884872000 | -3.604863000 | 2.464378000  |
| 1  | -0.309750000 | -3.472024000 | 3.384452000  |
| 1  | -1.644649000 | -2.816005000 | 2.418294000  |
| 1  | -1.411581000 | -4.560658000 | 2.536162000  |
| 6  | -0.792223000 | -3.771192000 | -0.053628000 |
| 1  | -0.169577000 | -3.654006000 | -0.944399000 |
| 1  | -1.218386000 | -4.779677000 | -0.080188000 |
| 1  | -1.620838000 | -3.061454000 | -0.123986000 |
| 6  | -3.387262000 | 2.299974000  | 1.813793000  |
| 1  | -3.983092000 | 3.217115000  | 1.800103000  |
| 1  | -3.808301000 | 1.641329000  | 2.579188000  |
| 1  | -2.368158000 | 2.571856000  | 2.113935000  |
| 6  | -2.806722000 | 2.558439000  | -0.626918000 |
| 1  | -1.797031000 | 2.884934000  | -0.361921000 |
| 1  | -2.757964000 | 2.067106000  | -1.601646000 |
| 1  | -3.428118000 | 3.453382000  | -0.737977000 |
| 5  | 0.165003000  | -0.099690000 | -1.205353000 |
| 7  | -1.251947000 | 0.771648000  | 4.772611000  |
| 7  | -0.665439000 | 0.413674000  | 3.441610000  |
| 1  | -0.593781000 | 0.619420000  | 5.531741000  |
| 1  | -1.674558000 | 1.696830000  | 4.776600000  |
| 1  | -1.620048000 | -0.117104000 | 4.086575000  |

Cartesian coordinates of the intermediate and TS involved in the conversion of [6]<sub>dis</sub>→[7]<sub>alt</sub> for the catalysts [1c''<sub>PB</sub>] and [1f''<sub>SB</sub>], along with their total energies (in hartree) including zero point vibrational correction at M06-L-D3(heptane)/6-311+G\* level of theory.

For catalyst [1c''<sub>PB</sub>]

[6c''<sub>PB</sub>-V-H]<sup>+</sup><sub>dis</sub> (TE = -3507.690919)

|    |              |              |              |
|----|--------------|--------------|--------------|
| 6  | 0.997659000  | -1.334711000 | 1.820066000  |
| 6  | 0.854841000  | -2.367037000 | 2.768532000  |
| 1  | -0.128138000 | -2.555906000 | 3.198226000  |
| 6  | 1.919829000  | -3.158825000 | 3.178526000  |
| 1  | 1.765169000  | -3.938497000 | 3.920517000  |
| 6  | 3.168024000  | -2.965029000 | 2.605649000  |
| 1  | 4.010831000  | -3.591737000 | 2.887013000  |
| 6  | 3.333789000  | -1.974016000 | 1.645160000  |
| 1  | 4.309360000  | -1.873049000 | 1.184851000  |
| 6  | 2.280544000  | -1.141559000 | 1.252511000  |
| 6  | -0.533173000 | 0.942989000  | 2.162852000  |
| 6  | -0.260842000 | 1.092430000  | 3.532631000  |
| 1  | 0.245533000  | 0.286430000  | 4.064806000  |
| 6  | -0.623859000 | 2.238525000  | 4.230577000  |
| 1  | -0.397143000 | 2.323764000  | 5.290746000  |
| 6  | -1.270387000 | 3.274167000  | 3.566957000  |
| 1  | -1.560590000 | 4.175336000  | 4.101338000  |
| 6  | -1.534990000 | 3.157460000  | 2.206969000  |
| 1  | -2.029831000 | 3.979262000  | 1.696222000  |
| 6  | -1.171291000 | 2.009897000  | 1.495948000  |
| 6  | -1.657451000 | -1.352971000 | 1.434464000  |
| 6  | -2.548543000 | -1.413995000 | 2.517153000  |
| 1  | -2.351407000 | -0.815392000 | 3.406723000  |
| 6  | -3.683446000 | -2.214902000 | 2.478534000  |
| 1  | -4.355325000 | -2.246912000 | 3.333172000  |
| 6  | -3.971421000 | -2.955685000 | 1.336527000  |
| 1  | -4.868353000 | -3.568517000 | 1.290647000  |
| 6  | -3.115100000 | -2.895222000 | 0.243597000  |
| 1  | -3.363337000 | -3.455082000 | -0.654514000 |
| 6  | -1.957382000 | -2.111425000 | 0.288173000  |
| 23 | 0.465717000  | 0.384999000  | -1.474641000 |
| 6  | 3.386653000  | 1.517132000  | 0.761596000  |
| 1  | 4.295606000  | 1.063979000  | 1.180782000  |
| 6  | -3.278687000 | 1.894736000  | -0.512936000 |
| 1  | -3.563970000 | 2.862786000  | -0.077251000 |
| 6  | -0.038618000 | -3.451855000 | -1.566983000 |
| 1  | 0.146454000  | -3.358390000 | -2.647959000 |
| 6  | -0.878813000 | -4.691900000 | -1.295053000 |
| 1  | -0.326043000 | -5.584880000 | -1.604290000 |



|    |              |              |              |
|----|--------------|--------------|--------------|
| 1  | -1.089672000 | -4.800701000 | -0.226608000 |
| 1  | -1.831919000 | -4.706283000 | -1.824677000 |
| 6  | 1.306240000  | -3.573342000 | -0.867224000 |
| 1  | 1.192189000  | -3.666516000 | 0.217482000  |
| 1  | 1.832553000  | -4.467638000 | -1.216356000 |
| 1  | 1.942797000  | -2.710443000 | -1.067861000 |
| 6  | 3.798811000  | 2.599099000  | -0.228762000 |
| 1  | 4.471262000  | 2.236806000  | -1.008297000 |
| 1  | 2.934783000  | 3.039521000  | -0.730341000 |
| 1  | 4.316708000  | 3.410250000  | 0.293133000  |
| 6  | 2.583552000  | 2.088715000  | 1.916384000  |
| 1  | 2.334225000  | 1.327899000  | 2.659954000  |
| 1  | 3.162268000  | 2.866974000  | 2.424888000  |
| 1  | 1.646159000  | 2.545327000  | 1.586952000  |
| 6  | -3.684690000 | 1.882708000  | -1.982728000 |
| 1  | -4.731863000 | 2.182322000  | -2.090083000 |
| 1  | -3.091337000 | 2.552891000  | -2.611557000 |
| 1  | -3.600147000 | 0.880560000  | -2.410114000 |
| 6  | -3.997622000 | 0.815435000  | 0.276082000  |
| 1  | -3.780086000 | -0.189415000 | -0.096600000 |
| 1  | -3.739289000 | 0.836025000  | 1.337519000  |
| 1  | -5.080229000 | 0.959937000  | 0.197584000  |
| 5  | -0.332223000 | -0.516397000 | 1.619259000  |
| 7  | 1.561052000  | 2.436981000  | -3.365168000 |
| 7  | 1.161752000  | 1.596685000  | -2.414381000 |
| 1  | 2.338688000  | 2.083431000  | -3.920637000 |
| 15 | -0.874672000 | -1.833452000 | -1.154703000 |
| 15 | 2.534083000  | 0.089129000  | -0.098483000 |
| 15 | -1.418798000 | 1.898967000  | -0.316235000 |
| 6  | -2.071439000 | -1.493302000 | -2.563926000 |
| 1  | -2.918296000 | -1.020437000 | -2.047094000 |
| 6  | -2.594969000 | -2.677786000 | -3.361791000 |
| 1  | -3.227749000 | -2.319171000 | -4.180735000 |
| 1  | -1.788707000 | -3.260067000 | -3.817677000 |
| 1  | -3.205770000 | -3.359509000 | -2.767697000 |
| 6  | -1.445384000 | -0.460986000 | -3.497263000 |
| 1  | -1.172303000 | 0.480410000  | -2.981181000 |
| 1  | -0.557454000 | -0.842215000 | -4.006425000 |
| 1  | -2.154865000 | -0.141093000 | -4.268427000 |
| 6  | -1.009307000 | 3.601611000  | -1.029906000 |
| 1  | -0.834900000 | 3.355604000  | -2.087190000 |
| 6  | 0.298453000  | 4.119113000  | -0.450860000 |
| 1  | 1.071368000  | 3.350213000  | -0.452203000 |
| 1  | 0.666110000  | 4.973789000  | -1.029399000 |
| 1  | 0.178955000  | 4.459638000  | 0.582095000  |
| 6  | -2.078105000 | 4.688895000  | -0.980809000 |

|   |              |              |              |
|---|--------------|--------------|--------------|
| 1 | -1.694080000 | 5.581476000  | -1.485842000 |
| 1 | -3.007247000 | 4.420157000  | -1.485243000 |
| 1 | -2.329876000 | 4.998944000  | 0.036462000  |
| 6 | 3.950939000  | -0.627115000 | -1.129312000 |
| 1 | 3.737398000  | -1.704783000 | -1.113869000 |
| 6 | 5.367828000  | -0.410324000 | -0.591574000 |
| 1 | 6.059876000  | -1.058696000 | -1.138195000 |
| 1 | 5.711359000  | 0.614149000  | -0.755531000 |
| 1 | 5.504031000  | -0.623169000 | 0.469154000  |
| 6 | 3.914537000  | -0.168582000 | -2.584288000 |
| 1 | 2.960740000  | -0.387170000 | -3.063344000 |
| 1 | 4.102664000  | 0.906832000  | -2.669876000 |
| 1 | 4.706804000  | -0.672442000 | -3.147544000 |
| 1 | 1.754373000  | 3.379043000  | -3.027661000 |
| 1 | 1.125410000  | -0.938010000 | -2.282219000 |

**TS<sub>hyb</sub>** (Doublet, TE = -3507.662111)

|   |              |              |             |
|---|--------------|--------------|-------------|
| 6 | -0.688929000 | -1.683996000 | 1.723007000 |
| 6 | -0.912629000 | -2.008046000 | 3.069971000 |
| 1 | -0.360102000 | -1.479913000 | 3.848170000 |
| 6 | -1.845930000 | -2.971400000 | 3.434402000 |
| 1 | -2.014471000 | -3.194769000 | 4.485892000 |
| 6 | -2.572319000 | -3.650390000 | 2.457041000 |
| 1 | -3.301135000 | -4.405293000 | 2.742366000 |
| 6 | -2.367901000 | -3.352671000 | 1.115472000 |
| 1 | -2.946610000 | -3.877796000 | 0.359128000 |
| 6 | -1.438278000 | -2.370971000 | 0.758615000 |
| 6 | 1.936485000  | -1.066397000 | 1.407597000 |
| 6 | 2.331963000  | -2.080897000 | 2.293876000 |
| 1 | 1.571368000  | -2.714943000 | 2.747067000 |
| 6 | 3.664740000  | -2.276049000 | 2.643348000 |
| 1 | 3.930123000  | -3.065929000 | 3.342934000 |
| 6 | 4.656684000  | -1.448068000 | 2.125122000 |
| 1 | 5.694955000  | -1.578695000 | 2.420010000 |
| 6 | 4.310051000  | -0.472619000 | 1.196212000 |
| 1 | 5.088907000  | 0.148253000  | 0.755803000 |
| 6 | 2.977016000  | -0.308491000 | 0.815254000 |
| 6 | 0.204787000  | 0.904198000  | 1.770662000 |
| 6 | 1.091232000  | 1.284459000  | 2.814840000 |
| 1 | 1.878638000  | 0.595974000  | 3.108413000 |
| 6 | 0.958998000  | 2.454364000  | 3.539100000 |
| 1 | 1.619694000  | 2.645714000  | 4.381712000 |
| 6 | -0.004084000 | 3.390556000  | 3.170783000 |
| 1 | -0.098870000 | 4.332411000  | 3.706017000 |
| 6 | -0.854167000 | 3.101622000  | 2.120022000 |
| 1 | -1.597258000 | 3.839203000  | 1.836010000 |

|    |              |              |              |
|----|--------------|--------------|--------------|
| 6  | -0.805434000 | 1.865143000  | 1.449814000  |
| 23 | -0.029124000 | 0.488590000  | -0.892038000 |
| 6  | -0.174355000 | -3.192713000 | -1.736234000 |
| 1  | -0.933034000 | -3.975536000 | -1.861041000 |
| 6  | 3.192416000  | 2.388772000  | -0.523248000 |
| 1  | 4.280358000  | 2.243347000  | -0.471996000 |
| 6  | -3.641205000 | 1.155719000  | 1.046104000  |
| 1  | -3.837888000 | 2.112578000  | 1.550270000  |
| 6  | -3.531249000 | 0.085331000  | 2.115321000  |
| 1  | -4.450728000 | 0.068530000  | 2.709510000  |
| 1  | -3.405409000 | -0.911790000 | 1.687902000  |
| 1  | -2.698965000 | 0.262029000  | 2.801223000  |
| 6  | -4.784547000 | 0.876601000  | 0.078885000  |
| 1  | -4.684326000 | -0.104911000 | -0.391612000 |
| 1  | -5.737640000 | 0.874177000  | 0.617003000  |
| 1  | -4.870050000 | 1.614308000  | -0.722872000 |
| 6  | 0.300318000  | -2.777211000 | -3.125257000 |
| 1  | -0.541545000 | -2.592727000 | -3.800530000 |
| 1  | 0.894000000  | -1.858837000 | -3.112788000 |
| 1  | 0.913965000  | -3.561733000 | -3.579849000 |
| 6  | 0.903778000  | -3.762298000 | -0.820039000 |
| 1  | 0.458773000  | -4.305035000 | 0.018126000  |
| 1  | 1.543257000  | -4.462825000 | -1.366931000 |
| 1  | 1.549591000  | -2.998931000 | -0.382483000 |
| 6  | 2.856499000  | 3.172319000  | -1.788061000 |
| 1  | 3.402376000  | 4.120645000  | -1.804881000 |
| 1  | 3.107384000  | 2.641094000  | -2.711149000 |
| 1  | 1.788129000  | 3.413244000  | -1.821654000 |
| 6  | 2.750116000  | 3.144312000  | 0.715296000  |
| 1  | 1.660106000  | 3.254575000  | 0.754362000  |
| 1  | 3.067760000  | 2.648299000  | 1.634153000  |
| 1  | 3.180666000  | 4.151127000  | 0.715936000  |
| 5  | 0.406102000  | -0.620878000 | 1.281480000  |
| 7  | 0.064967000  | 1.121712000  | -3.863665000 |
| 7  | -0.012053000 | 0.853411000  | -2.577432000 |
| 1  | -0.769417000 | 1.536194000  | -4.274806000 |
| 15 | -2.038695000 | 1.525905000  | 0.151452000  |
| 15 | -1.070265000 | -1.780084000 | -0.918171000 |
| 15 | 2.478399000  | 0.673543000  | -0.621021000 |
| 6  | -2.389099000 | 3.201210000  | -0.642002000 |
| 1  | -1.412514000 | 3.700073000  | -0.551347000 |
| 6  | -3.457439000 | 4.071198000  | 0.016430000  |
| 1  | -3.449083000 | 5.063376000  | -0.445683000 |
| 1  | -4.462568000 | 3.667333000  | -0.132501000 |
| 1  | -3.326333000 | 4.219475000  | 1.089442000  |
| 6  | -2.707987000 | 3.065511000  | -2.127843000 |

|   |              |              |              |
|---|--------------|--------------|--------------|
| 1 | -1.942921000 | 2.501496000  | -2.663061000 |
| 1 | -3.667879000 | 2.568654000  | -2.300677000 |
| 1 | -2.776460000 | 4.054897000  | -2.590938000 |
| 6 | 3.446075000  | -0.068236000 | -2.061339000 |
| 1 | 2.852725000  | 0.213442000  | -2.943846000 |
| 6 | 3.475588000  | -1.586381000 | -1.972826000 |
| 1 | 2.492360000  | -2.013488000 | -1.797076000 |
| 1 | 3.859279000  | -2.013421000 | -2.904839000 |
| 1 | 4.126919000  | -1.925968000 | -1.161727000 |
| 6 | 4.866187000  | 0.457262000  | -2.241679000 |
| 1 | 5.326097000  | -0.042259000 | -3.100664000 |
| 1 | 4.928200000  | 1.530542000  | -2.427562000 |
| 1 | 5.497574000  | 0.228519000  | -1.378112000 |
| 6 | -2.751195000 | -1.758304000 | -1.776885000 |
| 1 | -3.420253000 | -1.501894000 | -0.943416000 |
| 6 | -3.204540000 | -3.097310000 | -2.350349000 |
| 1 | -4.247269000 | -3.021105000 | -2.675325000 |
| 1 | -2.621603000 | -3.379477000 | -3.232466000 |
| 1 | -3.150867000 | -3.926851000 | -1.643169000 |
| 6 | -2.877263000 | -0.679097000 | -2.843047000 |
| 1 | -2.672091000 | 0.317923000  | -2.450686000 |
| 1 | -2.188987000 | -0.851961000 | -3.677234000 |
| 1 | -3.892275000 | -0.672747000 | -3.255256000 |
| 1 | 0.922793000  | 1.566623000  | -4.181058000 |
| 1 | 0.083604000  | 2.013089000  | -1.749165000 |

**TS<sub>hyb</sub>** (Quartet, TE = -3507.668505)

|   |              |              |             |
|---|--------------|--------------|-------------|
| 6 | -0.717994000 | -0.799522000 | 2.068576000 |
| 6 | -1.496479000 | -0.604695000 | 3.224694000 |
| 1 | -1.620420000 | 0.406671000  | 3.612517000 |
| 6 | -2.125157000 | -1.656355000 | 3.881748000 |
| 1 | -2.719348000 | -1.462583000 | 4.772149000 |
| 6 | -2.005283000 | -2.951243000 | 3.389075000 |
| 1 | -2.502568000 | -3.780410000 | 3.886540000 |
| 6 | -1.249143000 | -3.177142000 | 2.245119000 |
| 1 | -1.173750000 | -4.190838000 | 1.857248000 |
| 6 | -0.606309000 | -2.122953000 | 1.587760000 |
| 6 | 1.539602000  | 0.695047000  | 1.900759000 |
| 6 | 1.856651000  | 0.589947000  | 3.265095000 |
| 6 | 3.113531000  | 0.921680000  | 3.754918000 |
| 6 | 4.098364000  | 1.377748000  | 2.884205000 |
| 6 | 3.820188000  | 1.472375000  | 1.526572000 |
| 6 | 2.559485000  | 1.121953000  | 1.030418000 |
| 6 | -0.850205000 | 1.817863000  | 1.438658000 |
| 6 | -0.554039000 | 2.843762000  | 2.350355000 |
| 6 | -1.386679000 | 3.944234000  | 2.520838000 |

|    |              |              |              |
|----|--------------|--------------|--------------|
| 6  | -2.561629000 | 4.040793000  | 1.786947000  |
| 6  | -2.876530000 | 3.050431000  | 0.860883000  |
| 6  | -2.023382000 | 1.961719000  | 0.660644000  |
| 23 | 0.040004000  | -0.157801000 | -1.241883000 |
| 6  | 1.920907000  | -3.200125000 | 0.568436000  |
| 6  | 2.266890000  | 2.822703000  | -1.340130000 |
| 6  | -3.603383000 | -0.433990000 | 0.182900000  |
| 6  | -3.735922000 | -1.795195000 | -0.490822000 |
| 6  | -4.959332000 | 0.232817000  | 0.364646000  |
| 6  | 2.819285000  | -3.474457000 | -0.630715000 |
| 6  | 2.669492000  | -2.430274000 | 1.641881000  |
| 6  | 2.077879000  | 2.945553000  | -2.846293000 |
| 6  | 1.264761000  | 3.688443000  | -0.591930000 |
| 5  | 0.021065000  | 0.490103000  | 1.493800000  |
| 7  | -0.164672000 | -0.249556000 | -4.303737000 |
| 7  | -0.074812000 | -0.292552000 | -3.041218000 |
| 1  | -1.071181000 | -0.209567000 | -4.769156000 |
| 1  | -0.129212000 | 1.260855000  | -2.175931000 |
| 1  | 0.660409000  | -0.107642000 | -4.885203000 |
| 15 | -2.287761000 | 0.650167000  | -0.585390000 |
| 15 | 2.180131000  | 1.057467000  | -0.752671000 |
| 15 | 0.319483000  | -2.393344000 | 0.034992000  |
| 6  | -2.971986000 | 1.378344000  | -2.179980000 |
| 6  | -3.971152000 | 2.527506000  | -2.135138000 |
| 6  | -3.500257000 | 0.244173000  | -3.055548000 |
| 6  | -0.577459000 | -3.821831000 | -0.819335000 |
| 6  | -0.106354000 | -5.232932000 | -0.482387000 |
| 6  | -0.609734000 | -3.609366000 | -2.329544000 |
| 6  | 3.673121000  | 0.220715000  | -1.539852000 |
| 6  | 4.879086000  | 1.117650000  | -1.805734000 |
| 6  | 3.308279000  | -0.530767000 | -2.817278000 |

For catalyst [**1f'**<sub>SB</sub>]

[**6f'**<sub>SB</sub> -V-H]<sup>+</sup><sub>dis</sub> (TE = -3322.850968)

|   |              |              |              |
|---|--------------|--------------|--------------|
| 6 | -1.507398000 | -1.123562000 | 1.184265000  |
| 6 | -2.361576000 | -1.233713000 | 2.289551000  |
| 1 | -2.147119000 | -0.667931000 | 3.196231000  |
| 6 | -3.475963000 | -2.066000000 | 2.249290000  |
| 1 | -4.123138000 | -2.146206000 | 3.119206000  |
| 6 | -3.771222000 | -2.791000000 | 1.096155000  |
| 1 | -4.646596000 | -3.434546000 | 1.064344000  |
| 6 | -2.966495000 | -2.663875000 | -0.030304000 |

|    |              |              |              |
|----|--------------|--------------|--------------|
| 1  | -3.222683000 | -3.179074000 | -0.953756000 |
| 6  | -1.842853000 | -1.841195000 | 0.030374000  |
| 6  | 1.136720000  | -1.100302000 | 1.551358000  |
| 6  | 1.099080000  | -1.998666000 | 2.632465000  |
| 1  | 0.143453000  | -2.203471000 | 3.113694000  |
| 6  | 2.247215000  | -2.605241000 | 3.123823000  |
| 1  | 2.185522000  | -3.276667000 | 3.976376000  |
| 6  | 3.474470000  | -2.361836000 | 2.513350000  |
| 1  | 4.377295000  | -2.842628000 | 2.881227000  |
| 6  | 3.539709000  | -1.537897000 | 1.397086000  |
| 1  | 4.484056000  | -1.408119000 | 0.873275000  |
| 6  | 2.385106000  | -0.907822000 | 0.933234000  |
| 6  | -0.151612000 | 1.261720000  | 1.380753000  |
| 6  | 0.654549000  | 1.689912000  | 2.461915000  |
| 1  | 1.336000000  | 0.976080000  | 2.918642000  |
| 6  | 0.567814000  | 2.964973000  | 3.001777000  |
| 1  | 1.186346000  | 3.233869000  | 3.854199000  |
| 6  | -0.302544000 | 3.893806000  | 2.445093000  |
| 1  | -0.374885000 | 4.897917000  | 2.855179000  |
| 6  | -1.064766000 | 3.543794000  | 1.336907000  |
| 1  | -1.702092000 | 4.280396000  | 0.854918000  |
| 6  | -1.006114000 | 2.252243000  | 0.819422000  |
| 16 | -1.803443000 | 2.014394000  | -0.770239000 |
| 16 | -0.929296000 | -1.419631000 | -1.443405000 |
| 16 | 2.465214000  | -0.066014000 | -0.640591000 |
| 23 | 0.293434000  | 0.851236000  | -1.351755000 |
| 6  | -0.039437000 | -2.982588000 | -1.946911000 |
| 1  | -0.863794000 | -3.648581000 | -2.230492000 |
| 6  | 3.796214000  | 1.227831000  | -0.438350000 |
| 1  | 4.685813000  | 0.632492000  | -0.199038000 |
| 6  | -3.431347000 | 1.146548000  | -0.436780000 |
| 1  | -3.195907000 | 0.221194000  | 0.085297000  |
| 6  | -4.034225000 | 0.845530000  | -1.793075000 |
| 1  | -4.984188000 | 0.319442000  | -1.658314000 |
| 1  | -4.244201000 | 1.757810000  | -2.359820000 |
| 1  | -3.386780000 | 0.205547000  | -2.399041000 |
| 6  | -4.288667000 | 2.033162000  | 0.437795000  |
| 1  | -4.502293000 | 2.995468000  | -0.037086000 |
| 1  | -5.246327000 | 1.537986000  | 0.628760000  |
| 1  | -3.823627000 | 2.226678000  | 1.408420000  |
| 6  | 0.789252000  | -2.635474000 | -3.166012000 |
| 1  | 0.192940000  | -2.194081000 | -3.967537000 |
| 1  | 1.586620000  | -1.929117000 | -2.913928000 |
| 1  | 1.261119000  | -3.541647000 | -3.556723000 |
| 6  | 0.765045000  | -3.594393000 | -0.824189000 |
| 1  | 0.177726000  | -3.731657000 | 0.087855000  |

|   |              |              |              |
|---|--------------|--------------|--------------|
| 1 | 1.126872000  | -4.580370000 | -1.134362000 |
| 1 | 1.639846000  | -2.986887000 | -0.579093000 |
| 6 | 3.963432000  | 1.886891000  | -1.792090000 |
| 1 | 4.790865000  | 2.600734000  | -1.750539000 |
| 1 | 4.188830000  | 1.162973000  | -2.580113000 |
| 1 | 3.059576000  | 2.437841000  | -2.068476000 |
| 6 | 3.488288000  | 2.201144000  | 0.672644000  |
| 1 | 2.566968000  | 2.752597000  | 0.463845000  |
| 1 | 3.385177000  | 1.702901000  | 1.640110000  |
| 1 | 4.305138000  | 2.925148000  | 0.761308000  |
| 5 | -0.172729000 | -0.303075000 | 1.224193000  |
| 7 | 0.801711000  | 0.888367000  | -4.299028000 |
| 7 | 0.544463000  | 0.872605000  | -2.995309000 |
| 1 | 0.130583000  | 1.441659000  | -4.828871000 |
| 1 | 1.753641000  | 1.183155000  | -4.512276000 |
| 1 | 0.895048000  | 2.405316000  | -1.133186000 |

**TS<sub>hyb</sub>** (Doublet, TE = -3322.822926)

|   |              |              |              |
|---|--------------|--------------|--------------|
| 6 | -1.671543000 | -1.174579000 | 0.863917000  |
| 6 | -2.495804000 | -1.553143000 | 1.936245000  |
| 1 | -2.225450000 | -1.257024000 | 2.949568000  |
| 6 | -3.660324000 | -2.286311000 | 1.731158000  |
| 1 | -4.280813000 | -2.564404000 | 2.579920000  |
| 6 | -4.041085000 | -2.659496000 | 0.443453000  |
| 1 | -4.954726000 | -3.226306000 | 0.283727000  |
| 6 | -3.260286000 | -2.283575000 | -0.642695000 |
| 1 | -3.566213000 | -2.533148000 | -1.656792000 |
| 6 | -2.090592000 | -1.561078000 | -0.412622000 |
| 6 | 0.908767000  | -1.473631000 | 1.415919000  |
| 6 | 0.756964000  | -2.463245000 | 2.400201000  |
| 1 | -0.219543000 | -2.603778000 | 2.860936000  |
| 6 | 1.820173000  | -3.250624000 | 2.826395000  |
| 1 | 1.666497000  | -3.993211000 | 3.605706000  |
| 6 | 3.079485000  | -3.094627000 | 2.253611000  |
| 1 | 3.913415000  | -3.713181000 | 2.575182000  |
| 6 | 3.258881000  | -2.169922000 | 1.232582000  |
| 1 | 4.222988000  | -2.088345000 | 0.735123000  |
| 6 | 2.183484000  | -1.376035000 | 0.837973000  |
| 6 | -0.009031000 | 1.007510000  | 1.491008000  |
| 6 | 0.985862000  | 1.244245000  | 2.492239000  |
| 1 | 1.478757000  | 0.379102000  | 2.929567000  |
| 6 | 1.274511000  | 2.488179000  | 2.998491000  |

|    |              |              |              |
|----|--------------|--------------|--------------|
| 1  | 1.987458000  | 2.586479000  | 3.813888000  |
| 6  | 0.639905000  | 3.629642000  | 2.479019000  |
| 1  | 0.860223000  | 4.615381000  | 2.880908000  |
| 6  | -0.265765000 | 3.490813000  | 1.457196000  |
| 1  | -0.760866000 | 4.358903000  | 1.029657000  |
| 6  | -0.581042000 | 2.208503000  | 0.946758000  |
| 16 | -1.760454000 | 2.173537000  | -0.394479000 |
| 16 | -1.121406000 | -0.916741000 | -1.768156000 |
| 16 | 2.329473000  | -0.371599000 | -0.632145000 |
| 23 | 0.271688000  | 0.963481000  | -0.962013000 |
| 6  | -0.352083000 | -2.425346000 | -2.557776000 |
| 1  | -1.222817000 | -2.925389000 | -3.000362000 |
| 6  | 3.893883000  | 0.615344000  | -0.416267000 |
| 1  | 4.667610000  | -0.160027000 | -0.367057000 |
| 6  | -3.398366000 | 1.524957000  | 0.249156000  |
| 1  | -3.183844000 | 0.602353000  | 0.786069000  |
| 6  | -4.261459000 | 1.254511000  | -0.965185000 |
| 1  | -5.227721000 | 0.854900000  | -0.642730000 |
| 1  | -4.460483000 | 2.167849000  | -1.534758000 |
| 1  | -3.811117000 | 0.521554000  | -1.639607000 |
| 6  | -3.967419000 | 2.567016000  | 1.187355000  |
| 1  | -4.145116000 | 3.520620000  | 0.681203000  |
| 1  | -4.928551000 | 2.217450000  | 1.578282000  |
| 1  | -3.314094000 | 2.752439000  | 2.044002000  |
| 6  | 0.567412000  | -1.929958000 | -3.654948000 |
| 1  | 0.054825000  | -1.275378000 | -4.364503000 |
| 1  | 1.419605000  | -1.381805000 | -3.240870000 |
| 1  | 0.964250000  | -2.782090000 | -4.214417000 |
| 6  | 0.319555000  | -3.340876000 | -1.561157000 |
| 1  | -0.333957000 | -3.599024000 | -0.723694000 |
| 1  | 0.599299000  | -4.274670000 | -2.059866000 |
| 1  | 1.232960000  | -2.900087000 | -1.156364000 |
| 6  | 4.087730000  | 1.439492000  | -1.672963000 |
| 1  | 5.082814000  | 1.892538000  | -1.666718000 |
| 1  | 4.002608000  | 0.839679000  | -2.584149000 |
| 1  | 3.361276000  | 2.257908000  | -1.712188000 |
| 6  | 3.896424000  | 1.451349000  | 0.839703000  |
| 1  | 3.124395000  | 2.225978000  | 0.799832000  |
| 1  | 3.729268000  | 0.851684000  | 1.737762000  |
| 1  | 4.865998000  | 1.948745000  | 0.948680000  |
| 5  | -0.273702000 | -0.470083000 | 1.073484000  |
| 7  | 1.215780000  | 2.086653000  | -3.619965000 |
| 7  | 0.776572000  | 1.609627000  | -2.493048000 |
| 1  | 0.615144000  | 2.744168000  | -4.109713000 |
| 1  | 0.875597000  | 2.544134000  | -1.370470000 |
| 1  | 2.212313000  | 2.274556000  | -3.701906000 |



TS<sub>hyb</sub> (Quartet, TE = -3322.822176)

|    |              |              |              |
|----|--------------|--------------|--------------|
| 6  | -1.455769000 | -0.464197000 | 1.568188000  |
| 6  | -2.429478000 | -0.014599000 | 2.476540000  |
| 1  | -2.384037000 | 1.013454000  | 2.836132000  |
| 6  | -3.438736000 | -0.851112000 | 2.940234000  |
| 1  | -4.167345000 | -0.476345000 | 3.654825000  |
| 6  | -3.527695000 | -2.158666000 | 2.472849000  |
| 1  | -4.324712000 | -2.813020000 | 2.816305000  |
| 6  | -2.615554000 | -2.615915000 | 1.529212000  |
| 1  | -2.713061000 | -3.615923000 | 1.111966000  |
| 6  | -1.584854000 | -1.779976000 | 1.097977000  |
| 6  | 1.127707000  | 0.259124000  | 1.908888000  |
| 6  | 1.161072000  | 0.136677000  | 3.308139000  |
| 1  | 0.221287000  | 0.076125000  | 3.857570000  |
| 6  | 2.360259000  | 0.111000000  | 4.010189000  |
| 1  | 2.352715000  | 0.028686000  | 5.094183000  |
| 6  | 3.569026000  | 0.172464000  | 3.323087000  |
| 1  | 4.511500000  | 0.135380000  | 3.863264000  |
| 6  | 3.570156000  | 0.236434000  | 1.935255000  |
| 1  | 4.510104000  | 0.216255000  | 1.387496000  |
| 6  | 2.360220000  | 0.294439000  | 1.243210000  |
| 6  | -0.596630000 | 1.973591000  | 0.780014000  |
| 6  | -0.325692000 | 3.030773000  | 1.662927000  |
| 1  | 0.188432000  | 2.819630000  | 2.600641000  |
| 6  | -0.697026000 | 4.339614000  | 1.370265000  |
| 1  | -0.477704000 | 5.135891000  | 2.077347000  |
| 6  | -1.323460000 | 4.631313000  | 0.164089000  |
| 1  | -1.596218000 | 5.654478000  | -0.081507000 |
| 6  | -1.578197000 | 3.609662000  | -0.745880000 |
| 1  | -2.031845000 | 3.829338000  | -1.709631000 |
| 6  | -1.233863000 | 2.298092000  | -0.426892000 |
| 16 | -1.456511000 | 1.043777000  | -1.690460000 |
| 16 | -0.551845000 | -2.351348000 | -0.244138000 |
| 16 | 2.412762000  | 0.157361000  | -0.541817000 |
| 23 | 0.418536000  | -0.615797000 | -1.811206000 |
| 6  | 0.567920000  | -3.646849000 | 0.503000000  |
| 1  | -0.123285000 | -4.461794000 | 0.748605000  |
| 6  | 3.198822000  | 1.755033000  | -1.109834000 |
| 1  | 3.994143000  | 1.906162000  | -0.369688000 |
| 6  | -3.155627000 | 0.333827000  | -1.339316000 |
| 1  | -3.104035000 | -0.084318000 | -0.330250000 |
| 6  | -3.391089000 | -0.766897000 | -2.352856000 |
| 1  | -4.371640000 | -1.219672000 | -2.177755000 |
| 1  | -3.387316000 | -0.381622000 | -3.377301000 |
| 1  | -2.647228000 | -1.566157000 | -2.285933000 |

|   |              |              |              |
|---|--------------|--------------|--------------|
| 6 | -4.192753000 | 1.432344000  | -1.395849000 |
| 1 | -4.232816000 | 1.901875000  | -2.383480000 |
| 1 | -5.181562000 | 1.011030000  | -1.188453000 |
| 1 | -4.010736000 | 2.213005000  | -0.653267000 |
| 6 | 1.513554000  | -4.085504000 | -0.596646000 |
| 1 | 0.986078000  | -4.418700000 | -1.494470000 |
| 1 | 2.195160000  | -3.276646000 | -0.882018000 |
| 1 | 2.126489000  | -4.919181000 | -0.242154000 |
| 6 | 1.277414000  | -3.167716000 | 1.746334000  |
| 1 | 0.586731000  | -2.769339000 | 2.494248000  |
| 1 | 1.811645000  | -4.006308000 | 2.205386000  |
| 1 | 2.012951000  | -2.392579000 | 1.516311000  |
| 6 | 3.798647000  | 1.509079000  | -2.478127000 |
| 1 | 4.309599000  | 2.412766000  | -2.823011000 |
| 1 | 4.524555000  | 0.692872000  | -2.473588000 |
| 1 | 3.022423000  | 1.273473000  | -3.213206000 |
| 6 | 2.222484000  | 2.907282000  | -1.085878000 |
| 1 | 1.394766000  | 2.735765000  | -1.782625000 |
| 1 | 1.803382000  | 3.075770000  | -0.091758000 |
| 1 | 2.728004000  | 3.828237000  | -1.395688000 |
| 5 | -0.271753000 | 0.515965000  | 1.255837000  |
| 7 | 1.008843000  | -2.142513000 | -4.424561000 |
| 7 | 0.755702000  | -1.566156000 | -3.325471000 |
| 1 | 0.323457000  | -2.160980000 | -5.178382000 |
| 1 | 1.017159000  | 0.102542000  | -3.272595000 |
| 1 | 1.957916000  | -2.428496000 | -4.660804000 |

Cartesian coordinates of different nitrogenous species involved in the ligand exchange process (dissociation of NH<sub>3</sub> and addition of N<sub>2</sub>), along with their total energies (in hartree) including zero point vibrational correction at M06-D3(heptane)/def2-SVP level of theory.

For catalyst [**1c''<sub>PB</sub>**]

[V]-NH<sub>3</sub> (TE= -3450.307069)

|   |             |              |             |
|---|-------------|--------------|-------------|
| 6 | 1.212614000 | -0.947955000 | 1.847337000 |
| 6 | 1.122794000 | -1.688698000 | 3.041646000 |
| 1 | 0.184673000 | -1.659615000 | 3.609379000 |
| 6 | 2.176406000 | -2.457639000 | 3.529767000 |
| 1 | 2.058157000 | -3.020150000 | 4.461607000 |
| 6 | 3.379623000 | -2.503376000 | 2.830288000 |
| 1 | 4.220874000 | -3.096130000 | 3.202406000 |
| 6 | 3.495660000 | -1.796833000 | 1.635947000 |
| 1 | 4.437589000 | -1.858260000 | 1.081464000 |
| 6 | 2.427726000 | -1.044668000 | 1.128917000 |
| 6 | 0.053065000 | 1.522729000  | 1.813657000 |
| 6 | 0.637354000 | 1.866385000  | 3.046889000 |
| 1 | 1.116601000 | 1.076318000  | 3.639007000 |

|    |              |              |              |
|----|--------------|--------------|--------------|
| 6  | 0.627958000  | 3.167257000  | 3.544763000  |
| 1  | 1.102909000  | 3.388549000  | 4.506187000  |
| 6  | -0.000975000 | 4.180324000  | 2.825213000  |
| 1  | -0.034357000 | 5.203221000  | 3.212523000  |
| 6  | -0.581656000 | 3.877239000  | 1.595573000  |
| 1  | -1.069391000 | 4.677319000  | 1.029546000  |
| 6  | -0.531715000 | 2.579645000  | 1.070379000  |
| 6  | -1.477964000 | -0.674220000 | 1.721161000  |
| 6  | -2.111795000 | -0.344744000 | 2.933961000  |
| 1  | -1.605625000 | 0.345052000  | 3.621192000  |
| 6  | -3.364251000 | -0.838973000 | 3.284738000  |
| 1  | -3.821517000 | -0.550846000 | 4.236880000  |
| 6  | -4.038369000 | -1.687612000 | 2.409806000  |
| 1  | -5.031393000 | -2.073807000 | 2.659280000  |
| 6  | -3.437382000 | -2.036496000 | 1.204330000  |
| 1  | -3.984468000 | -2.692768000 | 0.521909000  |
| 6  | -2.170116000 | -1.548403000 | 0.852126000  |
| 23 | 0.106113000  | 0.067855000  | -1.134407000 |
| 6  | 3.845279000  | 1.015612000  | -0.353391000 |
| 1  | 4.763442000  | 0.485498000  | -0.036494000 |
| 6  | -2.931147000 | 2.479649000  | -0.667528000 |
| 1  | -3.095788000 | 3.557684000  | -0.479386000 |
| 6  | -0.811431000 | -3.701545000 | -0.671405000 |
| 1  | -1.038862000 | -4.111785000 | -1.675473000 |
| 6  | -1.505220000 | -4.543213000 | 0.386486000  |
| 1  | -1.134460000 | -5.582553000 | 0.346120000  |
| 1  | -1.284054000 | -4.153295000 | 1.395674000  |
| 1  | -2.599421000 | -4.578811000 | 0.278755000  |
| 6  | 0.691908000  | -3.761484000 | -0.475680000 |
| 1  | 0.991724000  | -3.312821000 | 0.488650000  |
| 1  | 1.043546000  | -4.808110000 | -0.481683000 |
| 1  | 1.218379000  | -3.217221000 | -1.273432000 |
| 6  | 4.117223000  | 1.722174000  | -1.673337000 |
| 1  | 4.383527000  | 1.029063000  | -2.487867000 |
| 1  | 3.237763000  | 2.297962000  | -2.005168000 |
| 1  | 4.948696000  | 2.440722000  | -1.568551000 |
| 6  | 3.459417000  | 2.000437000  | 0.738214000  |
| 1  | 3.400791000  | 1.515228000  | 1.725595000  |
| 1  | 4.199918000  | 2.816560000  | 0.803718000  |
| 1  | 2.470714000  | 2.455009000  | 0.546400000  |
| 6  | -3.455658000 | 2.108498000  | -2.046427000 |
| 1  | -4.549534000 | 2.240888000  | -2.107904000 |
| 1  | -3.004938000 | 2.703415000  | -2.859660000 |
| 1  | -3.235155000 | 1.043528000  | -2.250969000 |
| 6  | -3.643676000 | 1.686619000  | 0.410669000  |
| 1  | -3.484796000 | 0.603045000  | 0.275246000  |

|    |              |              |              |
|----|--------------|--------------|--------------|
| 1  | -3.289360000 | 1.944277000  | 1.421487000  |
| 1  | -4.730332000 | 1.875738000  | 0.370751000  |
| 5  | -0.035164000 | -0.034642000 | 1.435124000  |
| 15 | 2.512674000  | -0.298062000 | -0.560721000 |
| 15 | -1.074889000 | 2.198187000  | -0.648134000 |
| 15 | -1.401174000 | -1.900645000 | -0.791622000 |
| 6  | -0.500281000 | 3.647005000  | -1.735364000 |
| 1  | -0.617622000 | 3.203375000  | -2.746398000 |
| 6  | 0.983136000  | 3.877116000  | -1.513253000 |
| 1  | 1.428534000  | 4.476575000  | -2.326211000 |
| 1  | 1.171442000  | 4.406416000  | -0.563163000 |
| 1  | 1.506268000  | 2.908902000  | -1.451895000 |
| 6  | -1.273851000 | 4.956491000  | -1.736083000 |
| 1  | -0.839797000 | 5.641591000  | -2.485697000 |
| 1  | -2.337997000 | 4.834782000  | -1.990818000 |
| 1  | -1.217603000 | 5.477764000  | -0.766781000 |
| 6  | 3.426119000  | -1.642907000 | -1.560740000 |
| 1  | 3.129335000  | -2.559712000 | -1.019928000 |
| 6  | 4.946632000  | -1.618415000 | -1.623267000 |
| 1  | 5.311530000  | -2.525604000 | -2.136178000 |
| 1  | 5.329872000  | -0.757673000 | -2.195389000 |
| 1  | 5.428620000  | -1.595497000 | -0.634013000 |
| 6  | 2.837740000  | -1.723841000 | -2.962562000 |
| 1  | 3.226425000  | -2.601731000 | -3.507744000 |
| 1  | 1.735677000  | -1.802621000 | -2.920698000 |
| 1  | 3.093189000  | -0.829719000 | -3.561936000 |
| 6  | -2.877821000 | -2.041278000 | -1.975906000 |
| 1  | -3.570811000 | -1.264912000 | -1.593398000 |
| 6  | -2.396636000 | -1.612665000 | -3.355468000 |
| 1  | -1.601903000 | -2.288430000 | -3.728008000 |
| 1  | -3.217935000 | -1.628995000 | -4.093072000 |
| 1  | -1.978624000 | -0.593398000 | -3.321486000 |
| 6  | -3.627970000 | -3.361074000 | -2.083415000 |
| 1  | -2.984454000 | -4.164067000 | -2.481901000 |
| 1  | -4.047092000 | -3.716572000 | -1.130821000 |
| 1  | -4.472193000 | -3.256167000 | -2.786998000 |
| 7  | 0.352832000  | 0.528725000  | -3.321940000 |
| 1  | -0.413839000 | 1.087964000  | -3.703059000 |
| 1  | 1.198847000  | 1.089927000  | -3.444707000 |
| 1  | 0.454091000  | -0.272637000 | -3.948669000 |

[V] (TE= -3393.825304)

|   |             |              |             |
|---|-------------|--------------|-------------|
| 6 | 1.120257000 | -1.136340000 | 1.738734000 |
| 6 | 0.969903000 | -1.836762000 | 2.950438000 |
| 1 | 0.086376000 | -1.635856000 | 3.568740000 |
| 6 | 1.892479000 | -2.782264000 | 3.391569000 |

|    |              |              |              |
|----|--------------|--------------|--------------|
| 1  | 1.729973000  | -3.304907000 | 4.339656000  |
| 6  | 3.017814000  | -3.060954000 | 2.620846000  |
| 1  | 3.752324000  | -3.801661000 | 2.951282000  |
| 6  | 3.194930000  | -2.390308000 | 1.413078000  |
| 1  | 4.075645000  | -2.624842000 | 0.805532000  |
| 6  | 2.261514000  | -1.448264000 | 0.961150000  |
| 6  | 0.357796000  | 1.489569000  | 1.723081000  |
| 6  | 1.008605000  | 1.738279000  | 2.945778000  |
| 1  | 1.340651000  | 0.882526000  | 3.547156000  |
| 6  | 1.247462000  | 3.025170000  | 3.421381000  |
| 1  | 1.763321000  | 3.169180000  | 4.376171000  |
| 6  | 0.816228000  | 4.124797000  | 2.684487000  |
| 1  | 0.979809000  | 5.142642000  | 3.051199000  |
| 6  | 0.179874000  | 3.915082000  | 1.463328000  |
| 1  | -0.149473000 | 4.783463000  | 0.884566000  |
| 6  | -0.026111000 | 2.623140000  | 0.961484000  |
| 6  | -1.509050000 | -0.460748000 | 1.705270000  |
| 6  | -2.059600000 | -0.045164000 | 2.931565000  |
| 1  | -1.445795000 | 0.567157000  | 3.604409000  |
| 6  | -3.362094000 | -0.357758000 | 3.311461000  |
| 1  | -3.751206000 | -0.005595000 | 4.272226000  |
| 6  | -4.171727000 | -1.106132000 | 2.460201000  |
| 1  | -5.201379000 | -1.348836000 | 2.739522000  |
| 6  | -3.657455000 | -1.537918000 | 1.240990000  |
| 1  | -4.302100000 | -2.114779000 | 0.570492000  |
| 6  | -2.345242000 | -1.226680000 | 0.857872000  |
| 23 | 0.096921000  | 0.026876000  | -1.114592000 |
| 6  | 3.984952000  | 0.342367000  | -0.540838000 |
| 1  | 4.795158000  | -0.354935000 | -0.251924000 |
| 6  | -2.450494000 | 2.952660000  | -0.673313000 |
| 1  | -2.406802000 | 4.031026000  | -0.426475000 |
| 6  | -1.478680000 | -3.518200000 | -0.819011000 |
| 1  | -1.465948000 | -3.759703000 | -1.903020000 |
| 6  | -2.556445000 | -4.334255000 | -0.123030000 |
| 1  | -2.328054000 | -5.410615000 | -0.213392000 |
| 1  | -2.583519000 | -4.098109000 | 0.954453000  |
| 1  | -3.566582000 | -4.179086000 | -0.527330000 |
| 6  | -0.120517000 | -3.859296000 | -0.228341000 |
| 1  | -0.086482000 | -3.614774000 | 0.849287000  |
| 1  | 0.097898000  | -4.935496000 | -0.334879000 |
| 1  | 0.683408000  | -3.283475000 | -0.709135000 |
| 6  | 4.354584000  | 1.015964000  | -1.853901000 |
| 1  | 4.551818000  | 0.301145000  | -2.667641000 |
| 1  | 3.552590000  | 1.688716000  | -2.198831000 |
| 1  | 5.263128000  | 1.630276000  | -1.730003000 |
| 6  | 3.799938000  | 1.362462000  | 0.572458000  |

|    |              |              |              |
|----|--------------|--------------|--------------|
| 1  | 3.653044000  | 0.882093000  | 1.553022000  |
| 1  | 4.683512000  | 2.019658000  | 0.644670000  |
| 1  | 2.916765000  | 2.002651000  | 0.392729000  |
| 6  | -3.104044000 | 2.762717000  | -2.033545000 |
| 1  | -4.150281000 | 3.113356000  | -2.020459000 |
| 1  | -2.585428000 | 3.297664000  | -2.846247000 |
| 1  | -3.117835000 | 1.690584000  | -2.301208000 |
| 6  | -3.237288000 | 2.238382000  | 0.409011000  |
| 1  | -3.254890000 | 1.149187000  | 0.230383000  |
| 1  | -2.807671000 | 2.394201000  | 1.411474000  |
| 1  | -4.281323000 | 2.595529000  | 0.425144000  |
| 5  | 0.008030000  | -0.037718000 | 1.382567000  |
| 15 | 2.426682000  | -0.692846000 | -0.717592000 |
| 15 | -0.672799000 | 2.356223000  | -0.747413000 |
| 15 | -1.691415000 | -1.645940000 | -0.809387000 |
| 6  | 0.111898000  | 3.684158000  | -1.850377000 |
| 1  | -0.089172000 | 3.251633000  | -2.852061000 |
| 6  | 1.616824000  | 3.682955000  | -1.651131000 |
| 1  | 2.130703000  | 4.205578000  | -2.475833000 |
| 1  | 1.900949000  | 4.180435000  | -0.707761000 |
| 1  | 1.993985000  | 2.648958000  | -1.600965000 |
| 6  | -0.447093000 | 5.099100000  | -1.847631000 |
| 1  | 0.067214000  | 5.697602000  | -2.619888000 |
| 1  | -1.523920000 | 5.144975000  | -2.071422000 |
| 1  | -0.280435000 | 5.617500000  | -0.889502000 |
| 6  | 2.955110000  | -2.143953000 | -1.819182000 |
| 1  | 2.502494000  | -3.005475000 | -1.294650000 |
| 6  | 4.437563000  | -2.439615000 | -1.990366000 |
| 1  | 4.567847000  | -3.374379000 | -2.562928000 |
| 1  | 4.961013000  | -1.649487000 | -2.552344000 |
| 1  | 4.968698000  | -2.572184000 | -1.035026000 |
| 6  | 2.259441000  | -2.004738000 | -3.167767000 |
| 1  | 2.429072000  | -2.893246000 | -3.800648000 |
| 1  | 1.165929000  | -1.887824000 | -3.035284000 |
| 1  | 2.625979000  | -1.125749000 | -3.728512000 |
| 6  | -3.078189000 | -1.298819000 | -2.041555000 |
| 1  | -3.547005000 | -0.388454000 | -1.616337000 |
| 6  | -2.403210000 | -0.920474000 | -3.355906000 |
| 1  | -1.853884000 | -1.778334000 | -3.786360000 |
| 1  | -3.141145000 | -0.590476000 | -4.108083000 |
| 1  | -1.682300000 | -0.092054000 | -3.210073000 |
| 6  | -4.160418000 | -2.336665000 | -2.290049000 |
| 1  | -3.740799000 | -3.276543000 | -2.688468000 |
| 1  | -4.746567000 | -2.579570000 | -1.390909000 |
| 1  | -4.872765000 | -1.961390000 | -3.045282000 |

[V]-N<sub>2</sub> (TE= -3503.242278)

|    |              |              |              |
|----|--------------|--------------|--------------|
| 6  | 1.350043000  | -0.804282000 | 1.910822000  |
| 6  | 1.365225000  | -1.553234000 | 3.102815000  |
| 1  | 0.429480000  | -1.677824000 | 3.660955000  |
| 6  | 2.522642000  | -2.146461000 | 3.599608000  |
| 1  | 2.485761000  | -2.723575000 | 4.528992000  |
| 6  | 3.724465000  | -2.001722000 | 2.911227000  |
| 1  | 4.644078000  | -2.457141000 | 3.290518000  |
| 6  | 3.740216000  | -1.282615000 | 1.719740000  |
| 1  | 4.683619000  | -1.192384000 | 1.172625000  |
| 6  | 2.572016000  | -0.703639000 | 1.206912000  |
| 6  | -0.204901000 | 1.441898000  | 1.920748000  |
| 6  | 0.304733000  | 1.846330000  | 3.168208000  |
| 1  | 0.910910000  | 1.136737000  | 3.745303000  |
| 6  | 0.069054000  | 3.113332000  | 3.695786000  |
| 1  | 0.493517000  | 3.388649000  | 4.666552000  |
| 6  | -0.716947000 | 4.023303000  | 2.992874000  |
| 1  | -0.923081000 | 5.016476000  | 3.402777000  |
| 6  | -1.231149000 | 3.657583000  | 1.751353000  |
| 1  | -1.842457000 | 4.377164000  | 1.197564000  |
| 6  | -0.960818000 | 2.399059000  | 1.200229000  |
| 6  | -1.343729000 | -0.979637000 | 1.728155000  |
| 6  | -2.024124000 | -0.815088000 | 2.949879000  |
| 1  | -1.651078000 | -0.071304000 | 3.665129000  |
| 6  | -3.164998000 | -1.540934000 | 3.274914000  |
| 1  | -3.664151000 | -1.376875000 | 4.235155000  |
| 6  | -3.678389000 | -2.462794000 | 2.365081000  |
| 1  | -4.584204000 | -3.031059000 | 2.596181000  |
| 6  | -3.031173000 | -2.647455000 | 1.148332000  |
| 1  | -3.453657000 | -3.360649000 | 0.435629000  |
| 6  | -1.873289000 | -1.925400000 | 0.822403000  |
| 23 | 0.133900000  | 0.130694000  | -1.145572000 |
| 6  | 3.568571000  | 1.626431000  | -0.269430000 |
| 1  | 4.577929000  | 1.297334000  | 0.043659000  |
| 6  | -3.322200000 | 1.923013000  | -0.517946000 |
| 1  | -3.644747000 | 2.959443000  | -0.302613000 |
| 6  | -0.199098000 | -3.745704000 | -0.828767000 |
| 1  | -0.311471000 | -4.085225000 | -1.877703000 |
| 6  | -0.794701000 | -4.783968000 | 0.107138000  |
| 1  | -0.255563000 | -5.740783000 | -0.003225000 |
| 1  | -0.686916000 | -4.464853000 | 1.158425000  |
| 1  | -1.860866000 | -4.984598000 | -0.072902000 |
| 6  | 1.282261000  | -3.579563000 | -0.547222000 |
| 1  | 1.458426000  | -3.172349000 | 0.464904000  |
| 1  | 1.801641000  | -4.551239000 | -0.611475000 |
| 1  | 1.746972000  | -2.894427000 | -1.270379000 |

|    |              |              |              |
|----|--------------|--------------|--------------|
| 6  | 3.675670000  | 2.353307000  | -1.603188000 |
| 1  | 4.228662000  | 1.775269000  | -2.359908000 |
| 1  | 2.683085000  | 2.568632000  | -2.031936000 |
| 1  | 4.198183000  | 3.317476000  | -1.479992000 |
| 6  | 2.997015000  | 2.510656000  | 0.827181000  |
| 1  | 3.036431000  | 2.016915000  | 1.811427000  |
| 1  | 3.568103000  | 3.452324000  | 0.897023000  |
| 1  | 1.940301000  | 2.770463000  | 0.641330000  |
| 6  | -3.805800000 | 1.513071000  | -1.900736000 |
| 1  | -4.908090000 | 1.513757000  | -1.948709000 |
| 1  | -3.437615000 | 2.170915000  | -2.705541000 |
| 1  | -3.463332000 | 0.488756000  | -2.133220000 |
| 6  | -3.895361000 | 1.015460000  | 0.553055000  |
| 1  | -3.600152000 | -0.034662000 | 0.390020000  |
| 1  | -3.560898000 | 1.298194000  | 1.563914000  |
| 1  | -4.997811000 | 1.059458000  | 0.534849000  |
| 5  | -0.025334000 | -0.095165000 | 1.497305000  |
| 15 | 2.546853000  | 0.067767000  | -0.466320000 |
| 15 | -1.449796000 | 1.966520000  | -0.519812000 |
| 15 | -1.066960000 | -2.067636000 | -0.828714000 |
| 6  | -1.128055000 | 3.488771000  | -1.594032000 |
| 1  | -1.153940000 | 3.035617000  | -2.605108000 |
| 6  | 0.283877000  | 3.994397000  | -1.360054000 |
| 1  | 0.598547000  | 4.676767000  | -2.167565000 |
| 1  | 0.365805000  | 4.540640000  | -0.404381000 |
| 1  | 0.993264000  | 3.154326000  | -1.319832000 |
| 6  | -2.129259000 | 4.634065000  | -1.584297000 |
| 1  | -1.816635000 | 5.393432000  | -2.321904000 |
| 1  | -3.150417000 | 4.326481000  | -1.856426000 |
| 1  | -2.177591000 | 5.146203000  | -0.609360000 |
| 6  | 3.679351000  | -1.059388000 | -1.491739000 |
| 1  | 3.533495000  | -2.037386000 | -0.998110000 |
| 6  | 5.173569000  | -0.766258000 | -1.494361000 |
| 1  | 5.702197000  | -1.567019000 | -2.039745000 |
| 1  | 5.413800000  | 0.177243000  | -2.010286000 |
| 1  | 5.619543000  | -0.716274000 | -0.489393000 |
| 6  | 3.156455000  | -1.165234000 | -2.918277000 |
| 1  | 3.724303000  | -1.922335000 | -3.486116000 |
| 1  | 2.088204000  | -1.444695000 | -2.944522000 |
| 1  | 3.252532000  | -0.207281000 | -3.459449000 |
| 6  | -2.486934000 | -2.321998000 | -2.051539000 |
| 1  | -3.287520000 | -1.678080000 | -1.635123000 |
| 6  | -2.055589000 | -1.750696000 | -3.396582000 |
| 1  | -1.150814000 | -2.260876000 | -3.778673000 |
| 1  | -2.849796000 | -1.877301000 | -4.152251000 |
| 1  | -1.818165000 | -0.677302000 | -3.324492000 |



|   |              |              |              |
|---|--------------|--------------|--------------|
| 6 | -3.041381000 | -3.726651000 | -2.244405000 |
| 1 | -2.282562000 | -4.410951000 | -2.660707000 |
| 1 | -3.435002000 | -4.185332000 | -1.325569000 |
| 1 | -3.872305000 | -3.699064000 | -2.969836000 |
| 7 | 0.497010000  | 1.114694000  | -4.064914000 |
| 7 | 0.359274000  | 0.706241000  | -3.018725000 |

[V]-NH<sub>3</sub><sup>+</sup> (TE= -3450.183507)

|    |              |              |              |
|----|--------------|--------------|--------------|
| 6  | -1.557058000 | 0.311344000  | 1.907877000  |
| 6  | -1.691905000 | 0.834884000  | 3.207703000  |
| 1  | -0.792191000 | 0.987629000  | 3.814612000  |
| 6  | -2.925468000 | 1.176236000  | 3.753467000  |
| 1  | -2.979204000 | 1.582968000  | 4.767596000  |
| 6  | -4.087862000 | 1.003379000  | 3.005846000  |
| 1  | -5.063958000 | 1.267488000  | 3.421807000  |
| 6  | -3.991702000 | 0.500701000  | 1.713220000  |
| 1  | -4.907083000 | 0.382548000  | 1.124305000  |
| 6  | -2.747247000 | 0.166177000  | 1.161396000  |
| 6  | 0.388549000  | -1.612458000 | 1.659407000  |
| 6  | -0.142740000 | -2.321805000 | 2.752691000  |
| 1  | -0.988610000 | -1.892235000 | 3.302550000  |
| 6  | 0.392585000  | -3.533414000 | 3.180675000  |
| 1  | -0.045658000 | -4.050386000 | 4.039532000  |
| 6  | 1.502808000  | -4.072618000 | 2.533555000  |
| 1  | 1.949537000  | -5.008167000 | 2.881192000  |
| 6  | 2.034231000  | -3.412403000 | 1.429404000  |
| 1  | 2.901569000  | -3.845507000 | 0.920740000  |
| 6  | 1.469330000  | -2.216006000 | 0.969379000  |
| 6  | 1.074408000  | 0.957619000  | 1.786477000  |
| 6  | 1.731002000  | 0.810052000  | 3.023303000  |
| 1  | 1.471642000  | -0.041443000 | 3.664885000  |
| 6  | 2.710600000  | 1.697782000  | 3.454542000  |
| 1  | 3.194811000  | 1.548686000  | 4.424176000  |
| 6  | 3.085370000  | 2.767063000  | 2.642433000  |
| 1  | 3.861604000  | 3.466222000  | 2.965181000  |
| 6  | 2.471158000  | 2.929451000  | 1.406309000  |
| 1  | 2.787336000  | 3.756659000  | 0.764184000  |
| 6  | 1.473976000  | 2.040144000  | 0.976813000  |
| 23 | -0.143722000 | -0.162990000 | -1.157192000 |
| 6  | -3.419291000 | -2.072748000 | -0.601112000 |
| 1  | -4.474546000 | -1.900862000 | -0.318792000 |
| 6  | 3.832259000  | -1.220748000 | -0.530522000 |
| 1  | 4.241185000  | -2.231810000 | -0.340126000 |
| 6  | -0.392016000 | 3.674999000  | -0.646096000 |
| 1  | -0.524087000 | 3.928971000  | -1.718866000 |
| 6  | 0.141271000  | 4.881862000  | 0.110677000  |

|    |              |              |              |
|----|--------------|--------------|--------------|
| 1  | -0.596504000 | 5.699740000  | 0.055841000  |
| 1  | 0.276981000  | 4.639726000  | 1.178009000  |
| 1  | 1.090949000  | 5.274766000  | -0.272992000 |
| 6  | -1.738903000 | 3.283441000  | -0.062550000 |
| 1  | -1.646593000 | 3.013143000  | 1.004902000  |
| 1  | -2.451054000 | 4.122291000  | -0.132186000 |
| 1  | -2.172787000 | 2.419848000  | -0.582080000 |
| 6  | -3.377087000 | -2.694978000 | -1.989816000 |
| 1  | -3.769151000 | -2.031678000 | -2.778315000 |
| 1  | -2.349770000 | -2.984324000 | -2.269979000 |
| 1  | -3.979099000 | -3.618266000 | -2.013798000 |
| 6  | -2.793695000 | -2.985691000 | 0.440524000  |
| 1  | -2.919401000 | -2.594058000 | 1.461705000  |
| 1  | -3.267883000 | -3.980345000 | 0.400841000  |
| 1  | -1.711208000 | -3.128580000 | 0.275171000  |
| 6  | 4.370814000  | -0.708810000 | -1.857920000 |
| 1  | 5.469659000  | -0.630557000 | -1.818765000 |
| 1  | 4.120333000  | -1.359951000 | -2.711410000 |
| 1  | 3.982088000  | 0.300159000  | -2.079637000 |
| 6  | 4.227418000  | -0.316933000 | 0.624098000  |
| 1  | 3.841250000  | 0.708301000  | 0.488791000  |
| 1  | 3.849978000  | -0.685761000 | 1.591105000  |
| 1  | 5.325829000  | -0.253078000 | 0.691482000  |
| 5  | -0.079557000 | -0.100278000 | 1.442465000  |
| 15 | -2.635814000 | -0.371114000 | -0.588593000 |
| 15 | 1.987275000  | -1.463871000 | -0.622043000 |
| 15 | 0.724284000  | 2.165014000  | -0.689369000 |
| 6  | 1.788704000  | -2.850175000 | -1.881973000 |
| 1  | 1.873581000  | -2.298961000 | -2.841050000 |
| 6  | 0.372317000  | -3.391969000 | -1.759116000 |
| 1  | 0.080705000  | -3.977752000 | -2.648196000 |
| 1  | 0.273546000  | -4.048960000 | -0.878149000 |
| 1  | -0.389129000 | -2.596992000 | -1.629543000 |
| 6  | 2.798428000  | -3.984792000 | -1.908910000 |
| 1  | 2.586023000  | -4.648668000 | -2.764131000 |
| 1  | 3.837056000  | -3.638153000 | -2.020971000 |
| 1  | 2.738342000  | -4.607919000 | -1.002857000 |
| 6  | -3.883288000 | 0.719266000  | -1.507726000 |
| 1  | -3.932414000 | 1.616306000  | -0.865199000 |
| 6  | -5.299794000 | 0.181793000  | -1.652583000 |
| 1  | -5.935722000 | 0.954387000  | -2.115848000 |
| 1  | -5.349840000 | -0.704308000 | -2.305479000 |
| 1  | -5.767786000 | -0.084304000 | -0.692774000 |
| 6  | -3.328762000 | 1.142612000  | -2.861719000 |
| 1  | -3.989633000 | 1.887027000  | -3.335802000 |
| 1  | -2.325522000 | 1.599156000  | -2.773977000 |

|   |              |              |              |
|---|--------------|--------------|--------------|
| 1 | -3.264017000 | 0.286858000  | -3.558223000 |
| 6 | 2.148284000  | 2.591453000  | -1.851630000 |
| 1 | 3.000966000  | 2.059381000  | -1.384915000 |
| 6 | 1.876115000  | 1.957156000  | -3.208988000 |
| 1 | 0.946498000  | 2.352867000  | -3.661120000 |
| 1 | 2.697335000  | 2.170807000  | -3.913652000 |
| 1 | 1.785171000  | 0.861866000  | -3.124432000 |
| 6 | 2.528738000  | 4.052665000  | -2.034048000 |
| 1 | 1.702918000  | 4.639960000  | -2.470025000 |
| 1 | 2.845402000  | 4.546452000  | -1.104469000 |
| 1 | 3.375447000  | 4.122963000  | -2.736902000 |
| 7 | -0.382825000 | -0.516652000 | -3.367095000 |
| 1 | 0.472015000  | -0.631347000 | -3.917575000 |
| 1 | -0.966169000 | -1.325009000 | -3.602204000 |
| 1 | -0.865867000 | 0.286508000  | -3.778836000 |

[V]<sup>+</sup> (TE= -3393.702712)

|   |              |              |             |
|---|--------------|--------------|-------------|
| 6 | -1.573054000 | 0.626759000  | 1.795473000 |
| 6 | -1.695954000 | 1.311052000  | 3.018099000 |
| 1 | -0.804891000 | 1.451957000  | 3.640573000 |
| 6 | -2.911049000 | 1.821616000  | 3.467024000 |
| 1 | -2.960787000 | 2.346634000  | 4.425322000 |
| 6 | -4.057932000 | 1.668164000  | 2.692862000 |
| 1 | -5.017165000 | 2.067402000  | 3.033354000 |
| 6 | -3.969454000 | 1.009919000  | 1.469982000 |
| 1 | -4.871466000 | 0.907903000  | 0.857247000 |
| 6 | -2.748109000 | 0.498626000  | 1.014552000 |
| 6 | 0.104735000  | -1.544562000 | 1.578618000 |
| 6 | -0.623019000 | -2.179863000 | 2.605594000 |
| 1 | -1.401811000 | -1.613752000 | 3.129312000 |
| 6 | -0.361702000 | -3.486037000 | 3.005198000 |
| 1 | -0.937937000 | -3.932429000 | 3.820661000 |
| 6 | 0.643311000  | -4.217209000 | 2.376369000 |
| 1 | 0.868980000  | -5.238972000 | 2.693356000 |
| 6 | 1.361513000  | -3.635677000 | 1.335706000 |
| 1 | 2.149177000  | -4.218618000 | 0.849306000 |
| 6 | 1.099040000  | -2.323441000 | 0.918210000 |
| 6 | 1.136532000  | 0.944806000  | 1.757131000 |
| 6 | 1.747966000  | 0.803418000  | 3.015018000 |
| 1 | 1.362814000  | 0.050133000  | 3.714313000 |
| 6 | 2.835355000  | 1.585391000  | 3.394033000 |
| 1 | 3.285894000  | 1.453327000  | 4.382055000 |
| 6 | 3.357814000  | 2.525305000  | 2.507586000 |
| 1 | 4.218003000  | 3.137314000  | 2.792159000 |
| 6 | 2.782781000  | 2.675290000  | 1.249258000 |
| 1 | 3.209140000  | 3.405120000  | 0.555182000 |

|    |              |              |              |
|----|--------------|--------------|--------------|
| 6  | 1.678895000  | 1.898687000  | 0.870817000  |
| 23 | -0.125858000 | -0.292081000 | -0.992991000 |
| 6  | -3.665468000 | -1.779348000 | -0.622147000 |
| 1  | -4.693802000 | -1.424877000 | -0.418753000 |
| 6  | 3.776970000  | -1.786158000 | -0.256605000 |
| 1  | 3.929368000  | -2.844506000 | 0.031831000  |
| 6  | 0.066101000  | 3.632714000  | -0.921796000 |
| 1  | -0.115023000 | 3.744294000  | -2.011018000 |
| 6  | 0.852681000  | 4.828507000  | -0.405318000 |
| 1  | 0.259091000  | 5.745928000  | -0.554086000 |
| 1  | 1.034407000  | 4.735553000  | 0.678542000  |
| 1  | 1.818992000  | 4.981579000  | -0.903616000 |
| 6  | -1.270284000 | 3.559795000  | -0.199535000 |
| 1  | -1.127459000 | 3.415837000  | 0.886624000  |
| 1  | -1.835061000 | 4.496075000  | -0.337821000 |
| 1  | -1.891030000 | 2.727755000  | -0.557900000 |
| 6  | -3.643149000 | -2.498807000 | -1.963577000 |
| 1  | -3.940223000 | -1.860471000 | -2.809627000 |
| 1  | -2.641264000 | -2.902977000 | -2.185906000 |
| 1  | -4.335427000 | -3.356550000 | -1.943413000 |
| 6  | -3.246798000 | -2.711905000 | 0.501888000  |
| 1  | -3.301653000 | -2.229159000 | 1.490007000  |
| 1  | -3.907551000 | -3.594223000 | 0.521635000  |
| 1  | -2.213419000 | -3.081651000 | 0.368495000  |
| 6  | 4.564564000  | -1.497164000 | -1.525689000 |
| 1  | 5.644705000  | -1.518733000 | -1.308311000 |
| 1  | 4.380714000  | -2.232710000 | -2.324244000 |
| 1  | 4.334779000  | -0.493893000 | -1.927402000 |
| 6  | 4.204632000  | -0.893050000 | 0.896809000  |
| 1  | 4.069476000  | 0.174820000  | 0.649172000  |
| 1  | 3.631991000  | -1.094056000 | 1.816598000  |
| 1  | 5.271477000  | -1.052105000 | 1.122172000  |
| 5  | -0.131904000 | 0.028558000  | 1.452044000  |
| 15 | -2.616469000 | -0.232478000 | -0.665243000 |
| 15 | 1.949766000  | -1.609977000 | -0.550972000 |
| 15 | 0.921619000  | 1.972372000  | -0.797054000 |
| 6  | 1.560629000  | -2.753437000 | -1.993010000 |
| 1  | 2.213251000  | -2.356567000 | -2.794724000 |
| 6  | 0.115522000  | -2.453321000 | -2.385401000 |
| 1  | -0.269632000 | -3.165814000 | -3.134055000 |
| 1  | -0.577299000 | -2.554070000 | -1.519852000 |
| 1  | -0.015924000 | -1.455260000 | -2.869674000 |
| 6  | 1.807817000  | -4.242493000 | -1.845154000 |
| 1  | 1.659635000  | -4.749312000 | -2.813322000 |
| 1  | 2.833936000  | -4.467955000 | -1.512227000 |
| 1  | 1.105946000  | -4.698361000 | -1.127658000 |

|   |              |              |              |
|---|--------------|--------------|--------------|
| 6 | -3.521124000 | 0.932870000  | -1.834638000 |
| 1 | -3.395490000 | 1.914864000  | -1.344784000 |
| 6 | -5.012903000 | 0.705492000  | -2.028105000 |
| 1 | -5.426132000 | 1.510465000  | -2.658158000 |
| 1 | -5.231900000 | -0.243902000 | -2.542024000 |
| 1 | -5.579554000 | 0.715498000  | -1.084652000 |
| 6 | -2.781540000 | 0.967237000  | -3.167985000 |
| 1 | -3.235351000 | 1.707564000  | -3.847743000 |
| 1 | -1.716320000 | 1.236355000  | -3.041056000 |
| 1 | -2.816688000 | -0.010630000 | -3.681228000 |
| 6 | 2.325302000  | 1.963632000  | -2.046457000 |
| 1 | 3.027120000  | 1.241657000  | -1.584592000 |
| 6 | 1.797633000  | 1.364263000  | -3.345233000 |
| 1 | 1.022473000  | 2.006415000  | -3.801714000 |
| 1 | 2.607881000  | 1.256089000  | -4.086053000 |
| 1 | 1.354283000  | 0.362623000  | -3.193635000 |
| 6 | 3.071859000  | 3.255197000  | -2.337987000 |
| 1 | 2.415069000  | 4.009416000  | -2.802838000 |
| 1 | 3.539176000  | 3.704538000  | -1.449579000 |
| 1 | 3.882313000  | 3.053145000  | -3.058224000 |

[V]-N<sub>2</sub><sup>1+</sup>(TE= -3503.092601)

|   |              |              |             |
|---|--------------|--------------|-------------|
| 6 | -1.690295000 | 0.896407000  | 1.754228000 |
| 6 | -1.897268000 | 1.736911000  | 2.861717000 |
| 1 | -1.031579000 | 2.089896000  | 3.433129000 |
| 6 | -3.170102000 | 2.131608000  | 3.266771000 |
| 1 | -3.286968000 | 2.783353000  | 4.137311000 |
| 6 | -4.289824000 | 1.695617000  | 2.564143000 |
| 1 | -5.294266000 | 1.994331000  | 2.875936000 |
| 6 | -4.117486000 | 0.889738000  | 1.442190000 |
| 1 | -5.000087000 | 0.576124000  | 0.874892000 |
| 6 | -2.838868000 | 0.500542000  | 1.027323000 |
| 6 | 0.064542000  | -1.182824000 | 1.795320000 |
| 6 | -0.700102000 | -1.653517000 | 2.889646000 |
| 1 | -1.513053000 | -1.029652000 | 3.274955000 |
| 6 | -0.434133000 | -2.853474000 | 3.534990000 |
| 1 | -1.035914000 | -3.152195000 | 4.397819000 |
| 6 | 0.602155000  | -3.667148000 | 3.083716000 |
| 1 | 0.829956000  | -4.611237000 | 3.585773000 |
| 6 | 1.343986000  | -3.268698000 | 1.978707000 |
| 1 | 2.144554000  | -3.921238000 | 1.618741000 |
| 6 | 1.094016000  | -2.052437000 | 1.325714000 |
| 6 | 0.996339000  | 1.380406000  | 1.744191000 |
| 6 | 1.511742000  | 1.488363000  | 3.047195000 |
| 1 | 1.106420000  | 0.844777000  | 3.838518000 |
| 6 | 2.536615000  | 2.377545000  | 3.356259000 |

|    |              |              |              |
|----|--------------|--------------|--------------|
| 1  | 2.918547000  | 2.437472000  | 4.379464000  |
| 6  | 3.086339000  | 3.179689000  | 2.357249000  |
| 1  | 3.898064000  | 3.874488000  | 2.588944000  |
| 6  | 2.603485000  | 3.083313000  | 1.056358000  |
| 1  | 3.055254000  | 3.701821000  | 0.275113000  |
| 6  | 1.564559000  | 2.194573000  | 0.746046000  |
| 23 | -0.069253000 | -0.381547000 | -0.884958000 |
| 6  | -3.460117000 | -2.020183000 | -0.447635000 |
| 1  | -4.533352000 | -1.787394000 | -0.319009000 |
| 6  | 3.786631000  | -1.424839000 | 0.216414000  |
| 1  | 4.096354000  | -2.416424000 | 0.598379000  |
| 6  | -0.092359000 | 3.485508000  | -1.335331000 |
| 1  | -0.169652000 | 3.476367000  | -2.442508000 |
| 6  | 0.489666000  | 4.810126000  | -0.864335000 |
| 1  | -0.197708000 | 5.625632000  | -1.144525000 |
| 1  | 0.577186000  | 4.826305000  | 0.235008000  |
| 1  | 1.471018000  | 5.052976000  | -1.289536000 |
| 6  | -1.479684000 | 3.320038000  | -0.739289000 |
| 1  | -1.441037000 | 3.330593000  | 0.364665000  |
| 1  | -2.137750000 | 4.145693000  | -1.056221000 |
| 1  | -1.945761000 | 2.374161000  | -1.040508000 |
| 6  | -3.267810000 | -2.808715000 | -1.735898000 |
| 1  | -3.556082000 | -2.252468000 | -2.641957000 |
| 1  | -2.215508000 | -3.117963000 | -1.856239000 |
| 1  | -3.871725000 | -3.730490000 | -1.711119000 |
| 6  | -2.994192000 | -2.822744000 | 0.753609000  |
| 1  | -3.170414000 | -2.294931000 | 1.703733000  |
| 1  | -3.538900000 | -3.780386000 | 0.795208000  |
| 1  | -1.916755000 | -3.060530000 | 0.693200000  |
| 6  | 4.601020000  | -1.089616000 | -1.024732000 |
| 1  | 5.675689000  | -1.076030000 | -0.780321000 |
| 1  | 4.459751000  | -1.805363000 | -1.850414000 |
| 1  | 4.342404000  | -0.088415000 | -1.408133000 |
| 6  | 3.993740000  | -0.402477000 | 1.317001000  |
| 1  | 3.704478000  | 0.609944000  | 0.989503000  |
| 1  | 3.418219000  | -0.640411000 | 2.225479000  |
| 1  | 5.060247000  | -0.368778000 | 1.593877000  |
| 5  | -0.205101000 | 0.369856000  | 1.498638000  |
| 15 | -2.602884000 | -0.365039000 | -0.574440000 |
| 15 | 1.991228000  | -1.661408000 | -0.231937000 |
| 15 | 0.931158000  | 1.957159000  | -0.958641000 |
| 6  | 2.008124000  | -3.252186000 | -1.251201000 |
| 1  | 2.160423000  | -2.846782000 | -2.272621000 |
| 6  | 0.647769000  | -3.935593000 | -1.218973000 |
| 1  | 0.560977000  | -4.657303000 | -2.047673000 |
| 1  | 0.497104000  | -4.489332000 | -0.277579000 |

|   |              |              |              |
|---|--------------|--------------|--------------|
| 1 | -0.192085000 | -3.226259000 | -1.308565000 |
| 6 | 3.117266000  | -4.262556000 | -0.994194000 |
| 1 | 3.022322000  | -5.089603000 | -1.717346000 |
| 1 | 4.127594000  | -3.846288000 | -1.116935000 |
| 1 | 3.055480000  | -4.715279000 | 0.008539000  |
| 6 | -3.663359000 | 0.622240000  | -1.793216000 |
| 1 | -3.700047000 | 1.617101000  | -1.314889000 |
| 6 | -5.099378000 | 0.151007000  | -1.972706000 |
| 1 | -5.630600000 | 0.861321000  | -2.627617000 |
| 1 | -5.161912000 | -0.836056000 | -2.458051000 |
| 1 | -5.665869000 | 0.101344000  | -1.030519000 |
| 6 | -2.968785000 | 0.768174000  | -3.140763000 |
| 1 | -3.532605000 | 1.464613000  | -3.783134000 |
| 1 | -1.941031000 | 1.160737000  | -3.046734000 |
| 1 | -2.913746000 | -0.192139000 | -3.681580000 |
| 6 | 2.439002000  | 2.017756000  | -2.084673000 |
| 1 | 3.222452000  | 1.568163000  | -1.444066000 |
| 6 | 2.207773000  | 1.106290000  | -3.282911000 |
| 1 | 1.320682000  | 1.418351000  | -3.865801000 |
| 1 | 3.073003000  | 1.139593000  | -3.965653000 |
| 1 | 2.066267000  | 0.056440000  | -2.981166000 |
| 6 | 2.926505000  | 3.378412000  | -2.559116000 |
| 1 | 2.173428000  | 3.888485000  | -3.183000000 |
| 1 | 3.213351000  | 4.056986000  | -1.743183000 |
| 1 | 3.820462000  | 3.240431000  | -3.189380000 |
| 7 | -0.281434000 | -1.501570000 | -3.851800000 |
| 7 | -0.203789000 | -1.130211000 | -2.805197000 |

[V]-NH<sub>3</sub><sup>+</sup> (TE= -3450.347845)

|   |              |              |             |
|---|--------------|--------------|-------------|
| 6 | 1.171044000  | -0.909631000 | 1.789093000 |
| 6 | 1.071632000  | -1.757017000 | 2.917990000 |
| 1 | 0.097693000  | -1.839548000 | 3.419654000 |
| 6 | 2.153809000  | -2.465396000 | 3.432962000 |
| 1 | 2.020036000  | -3.104267000 | 4.314506000 |
| 6 | 3.416476000  | -2.341858000 | 2.846686000 |
| 1 | 4.280266000  | -2.879486000 | 3.252641000 |
| 6 | 3.552581000  | -1.536866000 | 1.715879000 |
| 1 | 4.536418000  | -1.465899000 | 1.236492000 |
| 6 | 2.451380000  | -0.867449000 | 1.166770000 |
| 6 | -0.007064000 | 1.504369000  | 1.749863000 |
| 6 | 0.642253000  | 1.919201000  | 2.935063000 |
| 1 | 1.255158000  | 1.184308000  | 3.475797000 |
| 6 | 0.500888000  | 3.197642000  | 3.465314000 |
| 1 | 1.015500000  | 3.462548000  | 4.397178000 |
| 6 | -0.331000000 | 4.133617000  | 2.840255000 |
| 1 | -0.475903000 | 5.130706000  | 3.270069000 |

|    |              |              |              |
|----|--------------|--------------|--------------|
| 6  | -0.957927000 | 3.779101000  | 1.646221000  |
| 1  | -1.593864000 | 4.515375000  | 1.139385000  |
| 6  | -0.756714000 | 2.515222000  | 1.075985000  |
| 6  | -1.488184000 | -0.668011000 | 1.647903000  |
| 6  | -2.199216000 | -0.289950000 | 2.808720000  |
| 1  | -1.760297000 | 0.480062000  | 3.458504000  |
| 6  | -3.424900000 | -0.846070000 | 3.160520000  |
| 1  | -3.935906000 | -0.517998000 | 4.073874000  |
| 6  | -4.003765000 | -1.824632000 | 2.349293000  |
| 1  | -4.973906000 | -2.264580000 | 2.605216000  |
| 6  | -3.331908000 | -2.228830000 | 1.196907000  |
| 1  | -3.802627000 | -2.983234000 | 0.557640000  |
| 6  | -2.099950000 | -1.661500000 | 0.839978000  |
| 23 | 0.100871000  | 0.063546000  | -1.125021000 |
| 6  | 3.769642000  | 1.298503000  | -0.305784000 |
| 1  | 4.719000000  | 0.817524000  | -0.001268000 |
| 6  | -3.101678000 | 2.247937000  | -0.774956000 |
| 1  | -3.353530000 | 3.311063000  | -0.597177000 |
| 6  | -0.481522000 | -3.737465000 | -0.581050000 |
| 1  | -0.790076000 | -4.249203000 | -1.513267000 |
| 6  | -1.001263000 | -4.524453000 | 0.610220000  |
| 1  | -0.566454000 | -5.541150000 | 0.622246000  |
| 1  | -0.713177000 | -4.028635000 | 1.554144000  |
| 1  | -2.097627000 | -4.627899000 | 0.619982000  |
| 6  | 1.034570000  | -3.703057000 | -0.562835000 |
| 1  | 1.413416000  | -3.175877000 | 0.330113000  |
| 1  | 1.448629000  | -4.728439000 | -0.552723000 |
| 1  | 1.432052000  | -3.180405000 | -1.447114000 |
| 6  | 3.993020000  | 2.023666000  | -1.624684000 |
| 1  | 4.284186000  | 1.346366000  | -2.445045000 |
| 1  | 3.078113000  | 2.551476000  | -1.943560000 |
| 1  | 4.787173000  | 2.786827000  | -1.529631000 |
| 6  | 3.358577000  | 2.265761000  | 0.790686000  |
| 1  | 3.311570000  | 1.770395000  | 1.773429000  |
| 1  | 4.075866000  | 3.103976000  | 0.861857000  |
| 1  | 2.356016000  | 2.691359000  | 0.608426000  |
| 6  | -3.519430000 | 1.847686000  | -2.181845000 |
| 1  | -4.615869000 | 1.897037000  | -2.310210000 |
| 1  | -3.064170000 | 2.477662000  | -2.966409000 |
| 1  | -3.203586000 | 0.802534000  | -2.368702000 |
| 6  | -3.828374000 | 1.404545000  | 0.252939000  |
| 1  | -3.577635000 | 0.336175000  | 0.135074000  |
| 1  | -3.557017000 | 1.684445000  | 1.282950000  |
| 1  | -4.922520000 | 1.513164000  | 0.140962000  |
| 5  | -0.057876000 | -0.024397000 | 1.268340000  |
| 15 | 2.499284000  | -0.092917000 | -0.507442000 |



|    |              |              |              |
|----|--------------|--------------|--------------|
| 15 | -1.224691000 | 2.084929000  | -0.644994000 |
| 15 | -1.219373000 | -1.980022000 | -0.752891000 |
| 6  | -0.741715000 | 3.623217000  | -1.693707000 |
| 1  | -0.782821000 | 3.198528000  | -2.719245000 |
| 6  | 0.707051000  | 3.968657000  | -1.404201000 |
| 1  | 1.142381000  | 4.619432000  | -2.184721000 |
| 1  | 0.807605000  | 4.487082000  | -0.434204000 |
| 1  | 1.300356000  | 3.041851000  | -1.332053000 |
| 6  | -1.611322000 | 4.870737000  | -1.691278000 |
| 1  | -1.193705000 | 5.626961000  | -2.382204000 |
| 1  | -2.647925000 | 4.680672000  | -2.012654000 |
| 1  | -1.650810000 | 5.343456000  | -0.695726000 |
| 6  | 3.558419000  | -1.362333000 | -1.500540000 |
| 1  | 3.299741000  | -2.299962000 | -0.976364000 |
| 6  | 5.075348000  | -1.246589000 | -1.511737000 |
| 1  | 5.519364000  | -2.113266000 | -2.036062000 |
| 1  | 5.424371000  | -0.344775000 | -2.043229000 |
| 1  | 5.517571000  | -1.224123000 | -0.503338000 |
| 6  | 3.023801000  | -1.473254000 | -2.920755000 |
| 1  | 3.459811000  | -2.339822000 | -3.451439000 |
| 1  | 1.923492000  | -1.590989000 | -2.905449000 |
| 1  | 3.262491000  | -0.572612000 | -3.519014000 |
| 6  | -2.651498000 | -2.354566000 | -1.970480000 |
| 1  | -3.416437000 | -1.614574000 | -1.657540000 |
| 6  | -2.168009000 | -1.981318000 | -3.363959000 |
| 1  | -1.307479000 | -2.612180000 | -3.664996000 |
| 1  | -2.959501000 | -2.111246000 | -4.125202000 |
| 1  | -1.824714000 | -0.933072000 | -3.383407000 |
| 6  | -3.289521000 | -3.736477000 | -2.005270000 |
| 1  | -2.599396000 | -4.488842000 | -2.425870000 |
| 1  | -3.608420000 | -4.105805000 | -1.018569000 |
| 1  | -4.182469000 | -3.734108000 | -2.657461000 |
| 7  | 0.334168000  | 0.568384000  | -3.340798000 |
| 1  | 0.557590000  | -0.206968000 | -3.967108000 |
| 1  | -0.480672000 | 1.038116000  | -3.738859000 |
| 1  | 1.111886000  | 1.227509000  | -3.406546000 |

[V]<sup>-</sup>(TE= -3393.874450)

|   |              |              |             |
|---|--------------|--------------|-------------|
| 6 | 0.889783000  | -1.252040000 | 1.704476000 |
| 6 | 0.568290000  | -2.029044000 | 2.841407000 |
| 1 | -0.347800000 | -1.782547000 | 3.394979000 |
| 6 | 1.364743000  | -3.076605000 | 3.298464000 |
| 1 | 1.067240000  | -3.641147000 | 4.190455000 |
| 6 | 2.551150000  | -3.395265000 | 2.635057000 |
| 1 | 3.195117000  | -4.206650000 | 2.991177000 |
| 6 | 2.895408000  | -2.668418000 | 1.495670000 |

|    |              |              |              |
|----|--------------|--------------|--------------|
| 1  | 3.814350000  | -2.934498000 | 0.958939000  |
| 6  | 2.074789000  | -1.640064000 | 1.014660000  |
| 6  | 0.536457000  | 1.425441000  | 1.683777000  |
| 6  | 1.302049000  | 1.601839000  | 2.857721000  |
| 1  | 1.597361000  | 0.706019000  | 3.421541000  |
| 6  | 1.663869000  | 2.853923000  | 3.346162000  |
| 1  | 2.248292000  | 2.933163000  | 4.270819000  |
| 6  | 1.252484000  | 4.011813000  | 2.680074000  |
| 1  | 1.503391000  | 5.003707000  | 3.071256000  |
| 6  | 0.525165000  | 3.883095000  | 1.497863000  |
| 1  | 0.218350000  | 4.789697000  | 0.962977000  |
| 6  | 0.211204000  | 2.620939000  | 0.973935000  |
| 6  | -1.574620000 | -0.192477000 | 1.648826000  |
| 6  | -2.109331000 | 0.386555000  | 2.820271000  |
| 1  | -1.440332000 | 0.984491000  | 3.454438000  |
| 6  | -3.440689000 | 0.236548000  | 3.198604000  |
| 1  | -3.806229000 | 0.708179000  | 4.118741000  |
| 6  | -4.311477000 | -0.517681000 | 2.409201000  |
| 1  | -5.362265000 | -0.640460000 | 2.693108000  |
| 6  | -3.824370000 | -1.107204000 | 1.243944000  |
| 1  | -4.513013000 | -1.685387000 | 0.617950000  |
| 6  | -2.486335000 | -0.943793000 | 0.857526000  |
| 23 | 0.103820000  | 0.015626000  | -1.072395000 |
| 6  | 4.019376000  | -0.045623000 | -0.489526000 |
| 1  | 4.748874000  | -0.825887000 | -0.195591000 |
| 6  | -2.142440000 | 3.171302000  | -0.778969000 |
| 1  | -2.016493000 | 4.248940000  | -0.556918000 |
| 6  | -1.807875000 | -3.365844000 | -0.765085000 |
| 1  | -1.934855000 | -3.622671000 | -1.838331000 |
| 6  | -2.897870000 | -4.040748000 | 0.051403000  |
| 1  | -2.806192000 | -5.140311000 | -0.019599000 |
| 1  | -2.798323000 | -3.771825000 | 1.117471000  |
| 1  | -3.917803000 | -3.774466000 | -0.264014000 |
| 6  | -0.447184000 | -3.865115000 | -0.313008000 |
| 1  | -0.279325000 | -3.642016000 | 0.756096000  |
| 1  | -0.356511000 | -4.957517000 | -0.451270000 |
| 1  | 0.359792000  | -3.362905000 | -0.866451000 |
| 6  | 4.456101000  | 0.568404000  | -1.811070000 |
| 1  | 4.535625000  | -0.168182000 | -2.626578000 |
| 1  | 3.740751000  | 1.339567000  | -2.142112000 |
| 1  | 5.441298000  | 1.058851000  | -1.710533000 |
| 6  | 3.966548000  | 1.004542000  | 0.607677000  |
| 1  | 3.746415000  | 0.560312000  | 1.591516000  |
| 1  | 4.928481000  | 1.543562000  | 0.679989000  |
| 1  | 3.173215000  | 1.749182000  | 0.414010000  |
| 6  | -2.728547000 | 2.996345000  | -2.171644000 |

|                                                    |              |              |              |
|----------------------------------------------------|--------------|--------------|--------------|
| 1                                                  | -3.751120000 | 3.410208000  | -2.232202000 |
| 1                                                  | -2.127037000 | 3.476117000  | -2.962241000 |
| 1                                                  | -2.788669000 | 1.918184000  | -2.413290000 |
| 6                                                  | -3.060222000 | 2.564116000  | 0.262987000  |
| 1                                                  | -3.151114000 | 1.474061000  | 0.113827000  |
| 1                                                  | -2.682554000 | 2.711747000  | 1.286974000  |
| 1                                                  | -4.070857000 | 3.006169000  | 0.198832000  |
| 5                                                  | -0.022944000 | -0.012585000 | 1.242410000  |
| 15                                                 | 2.343625000  | -0.903122000 | -0.654380000 |
| 15                                                 | -0.425548000 | 2.391002000  | -0.736826000 |
| 15                                                 | -1.822335000 | -1.467594000 | -0.776328000 |
| 6                                                  | 0.504142000  | 3.656303000  | -1.831486000 |
| 1                                                  | 0.282228000  | 3.245074000  | -2.838221000 |
| 6                                                  | 1.996905000  | 3.507372000  | -1.604917000 |
| 1                                                  | 2.581571000  | 3.978493000  | -2.415442000 |
| 1                                                  | 2.308181000  | 3.966591000  | -0.649994000 |
| 1                                                  | 2.259578000  | 2.438141000  | -1.551710000 |
| 6                                                  | 0.093143000  | 5.120759000  | -1.835355000 |
| 1                                                  | 0.695066000  | 5.678891000  | -2.576308000 |
| 1                                                  | -0.965077000 | 5.275773000  | -2.099364000 |
| 1                                                  | 0.269052000  | 5.605213000  | -0.860304000 |
| 6                                                  | 2.788799000  | -2.413070000 | -1.738932000 |
| 1                                                  | 2.232515000  | -3.218758000 | -1.225845000 |
| 6                                                  | 4.235633000  | -2.868733000 | -1.855576000 |
| 1                                                  | 4.290801000  | -3.813278000 | -2.427423000 |
| 1                                                  | 4.866649000  | -2.139466000 | -2.390231000 |
| 1                                                  | 4.707661000  | -3.058473000 | -0.878606000 |
| 6                                                  | 2.160432000  | -2.218716000 | -3.113301000 |
| 1                                                  | 2.251841000  | -3.128277000 | -3.735193000 |
| 1                                                  | 1.083598000  | -1.976153000 | -3.015315000 |
| 1                                                  | 2.639742000  | -1.389728000 | -3.666375000 |
| 6                                                  | -3.188521000 | -1.091676000 | -2.044301000 |
| 1                                                  | -3.567149000 | -0.113208000 | -1.685062000 |
| 6                                                  | -2.482512000 | -0.867707000 | -3.377105000 |
| 1                                                  | -2.029064000 | -1.804836000 | -3.752139000 |
| 1                                                  | -3.179823000 | -0.503410000 | -4.154051000 |
| 1                                                  | -1.667718000 | -0.125190000 | -3.269711000 |
| 6                                                  | -4.367654000 | -2.033171000 | -2.229543000 |
| 1                                                  | -4.041250000 | -3.036577000 | -2.555907000 |
| 1                                                  | -4.971821000 | -2.155709000 | -1.317217000 |
| 1                                                  | -5.044841000 | -1.649400000 | -3.014794000 |
| [V]-N <sub>2</sub> <sup>+</sup> (TE= -3503.300359) |              |              |              |
| 6                                                  | -1.227428000 | 0.848789000  | 1.836367000  |
| 6                                                  | -1.173093000 | 1.702676000  | 2.961043000  |
| 1                                                  | -0.199158000 | 1.881004000  | 3.436295000  |
| 6                                                  | -2.301533000 | 2.314955000  | 3.500115000  |

|    |              |              |              |
|----|--------------|--------------|--------------|
| 1  | -2.203222000 | 2.969457000  | 4.374291000  |
| 6  | -3.561066000 | 2.078424000  | 2.945518000  |
| 1  | -4.457840000 | 2.540582000  | 3.371608000  |
| 6  | -3.655027000 | 1.261418000  | 1.820349000  |
| 1  | -4.638546000 | 1.100075000  | 1.364504000  |
| 6  | -2.511111000 | 0.690112000  | 1.249130000  |
| 6  | 0.190803000  | -1.439859000 | 1.850189000  |
| 6  | -0.361517000 | -1.847946000 | 3.083604000  |
| 1  | -1.015267000 | -1.146721000 | 3.620724000  |
| 6  | -0.087669000 | -3.087125000 | 3.655374000  |
| 1  | -0.538774000 | -3.356212000 | 4.617979000  |
| 6  | 0.785706000  | -3.977996000 | 3.024994000  |
| 1  | 1.025353000  | -4.944136000 | 3.481545000  |
| 6  | 1.333738000  | -3.622948000 | 1.793429000  |
| 1  | 2.005567000  | -4.325001000 | 1.285161000  |
| 6  | 1.007440000  | -2.401136000 | 1.192123000  |
| 6  | 1.430682000  | 0.867229000  | 1.639143000  |
| 6  | 2.172870000  | 0.612021000  | 2.812979000  |
| 1  | 1.828284000  | -0.182801000 | 3.488353000  |
| 6  | 3.324655000  | 1.317983000  | 3.145018000  |
| 1  | 3.866267000  | 1.081279000  | 4.068515000  |
| 6  | 3.794498000  | 2.324791000  | 2.299266000  |
| 1  | 4.708018000  | 2.878869000  | 2.539925000  |
| 6  | 3.088426000  | 2.608740000  | 1.133452000  |
| 1  | 3.473586000  | 3.385774000  | 0.465931000  |
| 6  | 1.928859000  | 1.894259000  | 0.800958000  |
| 23 | -0.126993000 | -0.120551000 | -1.132827000 |
| 6  | -3.578916000 | -1.654442000 | -0.176462000 |
| 1  | -4.573809000 | -1.295204000 | 0.151407000  |
| 6  | 3.289158000  | -1.904536000 | -0.699100000 |
| 1  | 3.654060000  | -2.936321000 | -0.534652000 |
| 6  | 0.104277000  | 3.744408000  | -0.682175000 |
| 1  | 0.358470000  | 4.241876000  | -1.637401000 |
| 6  | 0.550575000  | 4.630433000  | 0.468613000  |
| 1  | 0.009232000  | 5.593643000  | 0.442539000  |
| 1  | 0.330045000  | 4.150687000  | 1.438371000  |
| 1  | 1.629006000  | 4.852078000  | 0.453701000  |
| 6  | -1.400938000 | 3.559629000  | -0.656784000 |
| 1  | -1.729584000 | 3.031791000  | 0.256082000  |
| 1  | -1.913095000 | 4.538801000  | -0.682498000 |
| 1  | -1.742986000 | 2.973726000  | -1.524299000 |
| 6  | -3.735646000 | -2.396426000 | -1.496872000 |
| 1  | -4.286992000 | -1.812082000 | -2.250573000 |
| 1  | -2.757371000 | -2.642913000 | -1.942416000 |
| 1  | -4.281738000 | -3.345955000 | -1.351921000 |
| 6  | -3.022658000 | -2.550082000 | 0.917415000  |

|    |              |              |              |
|----|--------------|--------------|--------------|
| 1  | -3.009942000 | -2.040136000 | 1.893964000  |
| 1  | -3.632887000 | -3.465807000 | 1.015691000  |
| 1  | -1.982675000 | -2.855286000 | 0.711973000  |
| 6  | 3.627901000  | -1.459833000 | -2.114731000 |
| 1  | 4.720454000  | -1.419385000 | -2.272795000 |
| 1  | 3.199106000  | -2.116007000 | -2.891318000 |
| 1  | 3.221894000  | -0.445843000 | -2.288636000 |
| 6  | 3.951428000  | -1.000652000 | 0.321269000  |
| 1  | 3.614577000  | 0.043511000  | 0.207225000  |
| 1  | 3.722373000  | -1.302014000 | 1.355731000  |
| 1  | 5.048605000  | -1.018546000 | 0.192332000  |
| 5  | 0.068971000  | 0.065716000  | 1.281226000  |
| 15 | -2.512342000 | -0.118331000 | -0.403434000 |
| 15 | 1.415896000  | -1.961973000 | -0.540942000 |
| 15 | 1.011986000  | 2.072267000  | -0.786433000 |
| 6  | 1.072341000  | -3.521034000 | -1.577704000 |
| 1  | 1.057870000  | -3.093697000 | -2.600194000 |
| 6  | -0.330390000 | -4.018051000 | -1.282013000 |
| 1  | -0.681454000 | -4.719014000 | -2.059852000 |
| 1  | -0.379887000 | -4.537031000 | -0.308121000 |
| 1  | -1.028508000 | -3.168404000 | -1.236782000 |
| 6  | 2.067910000  | -4.670699000 | -1.571336000 |
| 1  | 1.718549000  | -5.468655000 | -2.251736000 |
| 1  | 3.074176000  | -4.379313000 | -1.911713000 |
| 1  | 2.168935000  | -5.129984000 | -0.573357000 |
| 6  | -3.688801000 | 0.993481000  | -1.422588000 |
| 1  | -3.500169000 | 1.982060000  | -0.966702000 |
| 6  | -5.188624000 | 0.741417000  | -1.356144000 |
| 1  | -5.725280000 | 1.535221000  | -1.906969000 |
| 1  | -5.475183000 | -0.214544000 | -1.825513000 |
| 1  | -5.589168000 | 0.738600000  | -0.330449000 |
| 6  | -3.222086000 | 1.051249000  | -2.870477000 |
| 1  | -3.788971000 | 1.810973000  | -3.438847000 |
| 1  | -2.146399000 | 1.294391000  | -2.936872000 |
| 1  | -3.358494000 | 0.082847000  | -3.385149000 |
| 6  | 2.372340000  | 2.498159000  | -2.050382000 |
| 1  | 3.203092000  | 1.836369000  | -1.730476000 |
| 6  | 1.897134000  | 2.053027000  | -3.426493000 |
| 1  | 0.965638000  | 2.579688000  | -3.712548000 |
| 1  | 2.652678000  | 2.272816000  | -4.202431000 |
| 1  | 1.673103000  | 0.974668000  | -3.453119000 |
| 6  | 2.891025000  | 3.928183000  | -2.133124000 |
| 1  | 2.136816000  | 4.604091000  | -2.572479000 |
| 1  | 3.188955000  | 4.358618000  | -1.165260000 |
| 1  | 3.773297000  | 3.974065000  | -2.796703000 |
| 7  | -0.365551000 | -1.089144000 | -4.066725000 |

7 -0.285781000 -0.681373000 -3.002535000

For catalyst [**I**'<sub>SB</sub>]

[**V**]-NH<sub>3</sub> (TE= -3265.958642)

|    |              |              |              |
|----|--------------|--------------|--------------|
| 6  | -0.307507000 | 1.713584000  | 1.154431000  |
| 6  | 0.101967000  | 2.333016000  | 2.350501000  |
| 1  | 0.655143000  | 1.736192000  | 3.086946000  |
| 6  | -0.151368000 | 3.673750000  | 2.631173000  |
| 1  | 0.191085000  | 4.107373000  | 3.576228000  |
| 6  | -0.833456000 | 4.463332000  | 1.707212000  |
| 1  | -1.033733000 | 5.518868000  | 1.913765000  |
| 6  | -1.231167000 | 3.897623000  | 0.499469000  |
| 1  | -1.728346000 | 4.508563000  | -0.262172000 |
| 6  | -0.968889000 | 2.550286000  | 0.233881000  |
| 6  | -1.193815000 | -0.826597000 | 1.453923000  |
| 6  | -1.765235000 | -0.594406000 | 2.719747000  |
| 1  | -1.418926000 | 0.270032000  | 3.300164000  |
| 6  | -2.762461000 | -1.402702000 | 3.260258000  |
| 1  | -3.173508000 | -1.173839000 | 4.248736000  |
| 6  | -3.240718000 | -2.495948000 | 2.540677000  |
| 1  | -4.027833000 | -3.135366000 | 2.951192000  |
| 6  | -2.722533000 | -2.747253000 | 1.273781000  |
| 1  | -3.111418000 | -3.574632000 | 0.669859000  |
| 6  | -1.722185000 | -1.925340000 | 0.745294000  |
| 6  | 1.469078000  | -0.347435000 | 1.307415000  |
| 6  | 1.719632000  | -0.812947000 | 2.612557000  |
| 1  | 0.892191000  | -0.819264000 | 3.333140000  |
| 6  | 2.960410000  | -1.296259000 | 3.020804000  |
| 1  | 3.096552000  | -1.652639000 | 4.046894000  |
| 6  | 4.018700000  | -1.344616000 | 2.116863000  |
| 1  | 4.993314000  | -1.741793000 | 2.415569000  |
| 6  | 3.812011000  | -0.905569000 | 0.812396000  |
| 1  | 4.616109000  | -0.981409000 | 0.073666000  |
| 6  | 2.565240000  | -0.403799000 | 0.420192000  |
| 16 | 2.360339000  | -0.026813000 | -1.335984000 |
| 16 | -1.349715000 | 1.953524000  | -1.422919000 |
| 16 | -1.246804000 | -2.222221000 | -0.966835000 |
| 23 | -0.085958000 | -0.145367000 | -1.509688000 |
| 6  | -3.217531000 | 1.737763000  | -1.378668000 |
| 1  | -3.616626000 | 2.768386000  | -1.410069000 |
| 6  | -0.135168000 | -3.737668000 | -0.838494000 |
| 1  | -0.828662000 | -4.574729000 | -0.636419000 |
| 6  | 3.130645000  | 1.683767000  | -1.503391000 |
| 1  | 2.910225000  | 1.877290000  | -2.570722000 |
| 6  | 4.627142000  | 1.635107000  | -1.289246000 |
| 1  | 5.077961000  | 2.610562000  | -1.541179000 |

|   |              |              |              |
|---|--------------|--------------|--------------|
| 1 | 4.865684000  | 1.429380000  | -0.231842000 |
| 1 | 5.109921000  | 0.863254000  | -1.909558000 |
| 6 | 2.448694000  | 2.717684000  | -0.643231000 |
| 1 | 2.563960000  | 2.480174000  | 0.428984000  |
| 1 | 2.891528000  | 3.713302000  | -0.818218000 |
| 1 | 1.371188000  | 2.773149000  | -0.859815000 |
| 6 | -3.561217000 | 0.995432000  | -2.651353000 |
| 1 | -3.219519000 | 1.533395000  | -3.552043000 |
| 1 | -3.076971000 | 0.000078000  | -2.632264000 |
| 1 | -4.650246000 | 0.845911000  | -2.735675000 |
| 6 | -3.700159000 | 1.015846000  | -0.146222000 |
| 1 | -3.417249000 | 1.537184000  | 0.781772000  |
| 1 | -4.800032000 | 0.928029000  | -0.168313000 |
| 1 | -3.274396000 | -0.001359000 | -0.105187000 |
| 6 | 0.492594000  | -3.882291000 | -2.207157000 |
| 1 | 1.148162000  | -4.767812000 | -2.246563000 |
| 1 | -0.263636000 | -3.981213000 | -3.004596000 |
| 1 | 1.109695000  | -2.987321000 | -2.418054000 |
| 6 | 0.897537000  | -3.619335000 | 0.252900000  |
| 1 | 1.561660000  | -2.759839000 | 0.057451000  |
| 1 | 0.444107000  | -3.475265000 | 1.246287000  |
| 1 | 1.516661000  | -4.532323000 | 0.287489000  |
| 5 | -0.017081000 | 0.147994000  | 0.947675000  |
| 7 | -0.184866000 | -0.428924000 | -3.727296000 |
| 1 | -0.493041000 | 0.404427000  | -4.233360000 |
| 1 | 0.712476000  | -0.692111000 | -4.140830000 |
| 1 | -0.839532000 | -1.170687000 | -3.988180000 |

[V] (TE= -3209.473694)

|   |              |              |              |
|---|--------------|--------------|--------------|
| 6 | 0.352700000  | -1.658846000 | 1.073807000  |
| 6 | -0.042029000 | -2.245178000 | 2.290949000  |
| 1 | -0.595852000 | -1.632254000 | 3.013348000  |
| 6 | 0.228831000  | -3.573911000 | 2.609101000  |
| 1 | -0.100708000 | -3.982937000 | 3.569375000  |
| 6 | 0.910355000  | -4.383026000 | 1.702109000  |
| 1 | 1.123046000  | -5.429938000 | 1.937488000  |
| 6 | 1.292704000  | -3.849907000 | 0.474811000  |
| 1 | 1.789389000  | -4.478778000 | -0.272169000 |
| 6 | 1.016904000  | -2.513230000 | 0.171829000  |
| 6 | 1.204911000  | 0.911389000  | 1.261929000  |
| 6 | 1.808842000  | 0.738637000  | 2.521889000  |
| 1 | 1.494669000  | -0.111035000 | 3.141082000  |
| 6 | 2.797870000  | 1.589977000  | 3.008948000  |
| 1 | 3.234987000  | 1.408940000  | 3.995964000  |
| 6 | 3.234887000  | 2.664427000  | 2.237162000  |
| 1 | 4.015309000  | 3.336828000  | 2.605169000  |

|    |              |              |              |
|----|--------------|--------------|--------------|
| 6  | 2.684982000  | 2.854680000  | 0.973343000  |
| 1  | 3.043362000  | 3.665526000  | 0.329767000  |
| 6  | 1.690842000  | 1.992927000  | 0.498946000  |
| 6  | -1.453049000 | 0.383731000  | 1.166279000  |
| 6  | -1.697610000 | 0.900615000  | 2.452855000  |
| 1  | -0.863050000 | 0.951148000  | 3.163226000  |
| 6  | -2.942769000 | 1.378058000  | 2.853459000  |
| 1  | -3.076007000 | 1.773085000  | 3.865468000  |
| 6  | -4.009218000 | 1.371920000  | 1.957902000  |
| 1  | -4.988022000 | 1.763661000  | 2.249488000  |
| 6  | -3.806714000 | 0.885874000  | 0.670036000  |
| 1  | -4.618334000 | 0.920122000  | -0.063253000 |
| 6  | -2.556137000 | 0.386278000  | 0.285985000  |
| 16 | -2.377328000 | -0.054991000 | -1.458352000 |
| 16 | 1.390311000  | -1.971166000 | -1.506283000 |
| 16 | 1.182755000  | 2.228484000  | -1.214386000 |
| 23 | 0.072228000  | 0.092462000  | -1.591640000 |
| 6  | 3.253871000  | -1.727565000 | -1.469336000 |
| 1  | 3.660027000  | -2.754938000 | -1.426189000 |
| 6  | 0.051854000  | 3.729813000  | -1.118067000 |
| 1  | 0.739743000  | 4.575894000  | -0.935721000 |
| 6  | -3.117450000 | -1.782821000 | -1.558582000 |
| 1  | -2.928996000 | -1.996835000 | -2.627705000 |
| 6  | -4.606762000 | -1.754927000 | -1.297554000 |
| 1  | -5.044551000 | -2.744996000 | -1.511674000 |
| 1  | -4.817593000 | -1.527644000 | -0.238733000 |
| 1  | -5.123547000 | -1.009817000 | -1.922856000 |
| 6  | -2.386232000 | -2.780410000 | -0.696526000 |
| 1  | -2.472364000 | -2.520064000 | 0.373246000  |
| 1  | -2.812327000 | -3.788860000 | -0.834579000 |
| 1  | -1.315613000 | -2.818045000 | -0.947775000 |
| 6  | 3.597446000  | -1.074345000 | -2.789572000 |
| 1  | 3.274015000  | -1.679991000 | -3.651759000 |
| 1  | 3.102309000  | -0.086629000 | -2.852269000 |
| 1  | 4.684961000  | -0.913902000 | -2.871585000 |
| 6  | 3.721032000  | -0.918509000 | -0.286468000 |
| 1  | 3.430424000  | -1.372875000 | 0.673901000  |
| 1  | 4.820766000  | -0.829545000 | -0.304481000 |
| 1  | 3.293415000  | 0.098029000  | -0.322881000 |
| 6  | -0.577731000 | 3.840361000  | -2.488746000 |
| 1  | -1.245057000 | 4.716257000  | -2.540518000 |
| 1  | 0.175581000  | 3.935158000  | -3.287810000 |
| 1  | -1.185034000 | 2.936947000  | -2.689113000 |
| 6  | -0.974120000 | 3.626845000  | -0.018997000 |
| 1  | -1.638949000 | 2.763603000  | -0.194001000 |
| 1  | -0.514872000 | 3.503429000  | 0.974570000  |



|   |              |              |             |
|---|--------------|--------------|-------------|
| 1 | -1.594503000 | 4.539269000  | 0.001585000 |
| 5 | 0.038211000  | -0.105960000 | 0.829696000 |

[V]-N<sub>2</sub> (TE= -3265.958642)

|    |              |              |              |
|----|--------------|--------------|--------------|
| 6  | -0.327816000 | 1.785322000  | 1.131618000  |
| 6  | 0.081173000  | 2.481609000  | 2.284390000  |
| 1  | 0.673792000  | 1.948789000  | 3.038507000  |
| 6  | -0.226790000 | 3.822398000  | 2.500733000  |
| 1  | 0.113867000  | 4.318967000  | 3.414627000  |
| 6  | -0.959687000 | 4.533225000  | 1.551755000  |
| 1  | -1.201321000 | 5.588438000  | 1.708233000  |
| 6  | -1.352677000 | 3.891169000  | 0.382025000  |
| 1  | -1.886057000 | 4.441284000  | -0.400915000 |
| 6  | -1.039957000 | 2.542961000  | 0.183927000  |
| 6  | -1.146507000 | -0.747837000 | 1.591475000  |
| 6  | -1.702049000 | -0.453721000 | 2.851212000  |
| 1  | -1.379732000 | 0.458445000  | 3.368476000  |
| 6  | -2.656261000 | -1.263244000 | 3.461183000  |
| 1  | -3.057216000 | -0.988293000 | 4.441699000  |
| 6  | -3.107717000 | -2.415834000 | 2.820483000  |
| 1  | -3.862809000 | -3.055374000 | 3.286474000  |
| 6  | -2.608941000 | -2.725958000 | 1.559807000  |
| 1  | -2.982911000 | -3.599255000 | 1.014328000  |
| 6  | -1.647049000 | -1.903957000 | 0.963619000  |
| 6  | 1.496364000  | -0.216389000 | 1.395947000  |
| 6  | 1.764013000  | -0.570395000 | 2.732341000  |
| 1  | 0.939987000  | -0.552147000 | 3.456050000  |
| 6  | 3.022895000  | -0.972117000 | 3.169555000  |
| 1  | 3.174908000  | -1.240950000 | 4.219510000  |
| 6  | 4.080486000  | -1.053464000 | 2.266373000  |
| 1  | 5.069328000  | -1.389823000 | 2.590881000  |
| 6  | 3.854693000  | -0.731472000 | 0.932589000  |
| 1  | 4.657417000  | -0.841119000 | 0.196973000  |
| 6  | 2.589126000  | -0.304424000 | 0.511421000  |
| 16 | 2.365286000  | -0.082758000 | -1.263884000 |
| 16 | -1.420254000 | 1.844945000  | -1.428490000 |
| 16 | -1.200544000 | -2.280066000 | -0.735973000 |
| 23 | -0.088698000 | -0.228256000 | -1.522986000 |
| 6  | -3.265006000 | 1.540655000  | -1.371984000 |
| 1  | -3.703866000 | 2.549977000  | -1.477382000 |
| 6  | -0.041762000 | -3.740943000 | -0.589606000 |
| 1  | -0.710663000 | -4.590183000 | -0.357463000 |
| 6  | 3.054640000  | 1.622330000  | -1.610536000 |
| 1  | 2.861377000  | 1.677697000  | -2.698391000 |
| 6  | 4.544172000  | 1.669218000  | -1.351009000 |
| 1  | 4.952679000  | 2.632871000  | -1.699293000 |

|   |              |              |              |
|---|--------------|--------------|--------------|
| 1 | 4.759096000  | 1.594658000  | -0.271422000 |
| 1 | 5.082337000  | 0.861242000  | -1.870837000 |
| 6 | 2.300829000  | 2.717157000  | -0.896977000 |
| 1 | 2.365178000  | 2.599150000  | 0.199127000  |
| 1 | 2.727510000  | 3.700699000  | -1.156950000 |
| 1 | 1.236596000  | 2.720631000  | -1.175667000 |
| 6 | -3.581538000 | 0.702783000  | -2.592610000 |
| 1 | -3.215302000 | 1.165505000  | -3.523800000 |
| 1 | -3.115857000 | -0.295510000 | -2.499060000 |
| 1 | -4.670896000 | 0.562409000  | -2.685990000 |
| 6 | -3.730698000 | 0.899169000  | -0.088537000 |
| 1 | -3.457650000 | 1.490738000  | 0.799501000  |
| 1 | -4.829170000 | 0.797514000  | -0.105505000 |
| 1 | -3.297963000 | -0.108707000 | 0.028872000  |
| 6 | 0.570612000  | -3.917092000 | -1.962932000 |
| 1 | 1.193635000  | -4.826066000 | -1.989014000 |
| 1 | -0.193133000 | -4.002280000 | -2.753418000 |
| 1 | 1.217141000  | -3.053195000 | -2.203373000 |
| 6 | 0.995320000  | -3.578314000 | 0.493493000  |
| 1 | 1.658907000  | -2.723984000 | 0.276966000  |
| 1 | 0.545251000  | -3.415707000 | 1.485544000  |
| 1 | 1.617965000  | -4.487569000 | 0.547280000  |
| 5 | -0.000607000 | 0.219756000  | 1.013057000  |
| 7 | -0.239709000 | -0.752687000 | -4.577154000 |
| 7 | -0.176055000 | -0.558555000 | -3.466583000 |

[V]-NH<sub>3</sub><sup>+</sup> (TE= -3265.840275)

|   |              |              |              |
|---|--------------|--------------|--------------|
| 6 | -0.591456000 | 1.903632000  | 0.734049000  |
| 6 | -0.206632000 | 2.941773000  | 1.603452000  |
| 1 | 0.606378000  | 2.760892000  | 2.315788000  |
| 6 | -0.832729000 | 4.186135000  | 1.606225000  |
| 1 | -0.507218000 | 4.955482000  | 2.312332000  |
| 6 | -1.867412000 | 4.453899000  | 0.712155000  |
| 1 | -2.361320000 | 5.429119000  | 0.705772000  |
| 6 | -2.240968000 | 3.475697000  | -0.203449000 |
| 1 | -3.010935000 | 3.684797000  | -0.953801000 |
| 6 | -1.612768000 | 2.227956000  | -0.184323000 |
| 6 | -0.917761000 | -0.635979000 | 1.556800000  |
| 6 | -1.509962000 | -0.323627000 | 2.794871000  |
| 1 | -1.334831000 | 0.668021000  | 3.230048000  |
| 6 | -2.321613000 | -1.221231000 | 3.481520000  |
| 1 | -2.754046000 | -0.936993000 | 4.445116000  |
| 6 | -2.596789000 | -2.475374000 | 2.936892000  |
| 1 | -3.241290000 | -3.182855000 | 3.465217000  |
| 6 | -2.067129000 | -2.807025000 | 1.695182000  |
| 1 | -2.306331000 | -3.768499000 | 1.228217000  |

|    |              |              |              |
|----|--------------|--------------|--------------|
| 6  | -1.237661000 | -1.897350000 | 1.030691000  |
| 6  | 1.592798000  | 0.356606000  | 1.372148000  |
| 6  | 1.856175000  | 0.471537000  | 2.751041000  |
| 1  | 1.013868000  | 0.602307000  | 3.440099000  |
| 6  | 3.139655000  | 0.405175000  | 3.283236000  |
| 1  | 3.285458000  | 0.500207000  | 4.363057000  |
| 6  | 4.233776000  | 0.198926000  | 2.445410000  |
| 1  | 5.245872000  | 0.131127000  | 2.852687000  |
| 6  | 4.018366000  | 0.048703000  | 1.081991000  |
| 1  | 4.857149000  | -0.161144000 | 0.410828000  |
| 6  | 2.721245000  | 0.139326000  | 0.559839000  |
| 16 | 2.583167000  | -0.247969000 | -1.199539000 |
| 16 | -2.002437000 | 1.093998000  | -1.521874000 |
| 16 | -0.680229000 | -2.354199000 | -0.611958000 |
| 23 | 0.123305000  | -0.199782000 | -1.498680000 |
| 6  | -3.732818000 | 0.440602000  | -1.233939000 |
| 1  | -4.365907000 | 1.247317000  | -1.644006000 |
| 6  | 0.622112000  | -3.654891000 | -0.295448000 |
| 1  | 0.018958000  | -4.526096000 | 0.018023000  |
| 6  | 2.790805000  | 1.387866000  | -2.082269000 |
| 1  | 2.945870000  | 1.038242000  | -3.120367000 |
| 6  | 4.007593000  | 2.142396000  | -1.604576000 |
| 1  | 4.144666000  | 3.048185000  | -2.217550000 |
| 1  | 3.888259000  | 2.463870000  | -0.556562000 |
| 1  | 4.923525000  | 1.537407000  | -1.681229000 |
| 6  | 1.523269000  | 2.210893000  | -1.997569000 |
| 1  | 1.285928000  | 2.499062000  | -0.959787000 |
| 1  | 1.626174000  | 3.141995000  | -2.579672000 |
| 1  | 0.639476000  | 1.713228000  | -2.461669000 |
| 6  | -3.855169000 | -0.798995000 | -2.093866000 |
| 1  | -3.570127000 | -0.609364000 | -3.142383000 |
| 1  | -3.225484000 | -1.614817000 | -1.697053000 |
| 1  | -4.899193000 | -1.151123000 | -2.093093000 |
| 6  | -4.068166000 | 0.204023000  | 0.216209000  |
| 1  | -3.889071000 | 1.094072000  | 0.839260000  |
| 1  | -5.138592000 | -0.049230000 | 0.294269000  |
| 1  | -3.489116000 | -0.634983000 | 0.632110000  |
| 6  | 1.278772000  | -3.937936000 | -1.629630000 |
| 1  | 1.969724000  | -4.790677000 | -1.534344000 |
| 1  | 0.541353000  | -4.191414000 | -2.409323000 |
| 1  | 1.871390000  | -3.069184000 | -1.967043000 |
| 6  | 1.598081000  | -3.285525000 | 0.793938000  |
| 1  | 2.236213000  | -2.436941000 | 0.500185000  |
| 1  | 1.094768000  | -3.022650000 | 1.737443000  |
| 1  | 2.257844000  | -4.145964000 | 0.993828000  |
| 5  | 0.060997000  | 0.452033000  | 0.903849000  |

|   |              |              |              |
|---|--------------|--------------|--------------|
| 7 | -0.009161000 | -0.829293000 | -3.633261000 |
| 1 | -0.358819000 | -0.113119000 | -4.276328000 |
| 1 | 0.853794000  | -1.183229000 | -4.055347000 |
| 1 | -0.680951000 | -1.599748000 | -3.701039000 |

[V]<sup>+</sup> (TE= -3209.351568)

|    |              |              |              |
|----|--------------|--------------|--------------|
| 6  | -1.946786000 | 0.366993000  | 1.385297000  |
| 6  | -2.588533000 | 1.241329000  | 2.279238000  |
| 1  | -1.978166000 | 1.784407000  | 3.009784000  |
| 6  | -3.966347000 | 1.434703000  | 2.266325000  |
| 1  | -4.430339000 | 2.119185000  | 2.981466000  |
| 6  | -4.749559000 | 0.753202000  | 1.338893000  |
| 1  | -5.834083000 | 0.889638000  | 1.320607000  |
| 6  | -4.149283000 | -0.109637000 | 0.425207000  |
| 1  | -4.769827000 | -0.645242000 | -0.297177000 |
| 6  | -2.764592000 | -0.280601000 | 0.435621000  |
| 6  | 0.205923000  | -1.282070000 | 1.618522000  |
| 6  | -0.635862000 | -2.282070000 | 2.182203000  |
| 1  | -1.646435000 | -1.990890000 | 2.487342000  |
| 6  | -0.217390000 | -3.579537000 | 2.402608000  |
| 1  | -0.896705000 | -4.301216000 | 2.863265000  |
| 6  | 1.086427000  | -3.959938000 | 2.060008000  |
| 1  | 1.437974000  | -4.975596000 | 2.259097000  |
| 6  | 1.941265000  | -3.039890000 | 1.479688000  |
| 1  | 2.966558000  | -3.329240000 | 1.242194000  |
| 6  | 1.508129000  | -1.726974000 | 1.218589000  |
| 6  | 0.498192000  | 1.472404000  | 1.673806000  |
| 6  | 1.076506000  | 1.791638000  | 2.909465000  |
| 1  | 0.952487000  | 1.093911000  | 3.746516000  |
| 6  | 1.803296000  | 2.966953000  | 3.093901000  |
| 1  | 2.246657000  | 3.191217000  | 4.067748000  |
| 6  | 1.961090000  | 3.852339000  | 2.032744000  |
| 1  | 2.521836000  | 4.781398000  | 2.166023000  |
| 6  | 1.408680000  | 3.558835000  | 0.785664000  |
| 1  | 1.547440000  | 4.264006000  | -0.037425000 |
| 6  | 0.699478000  | 2.372140000  | 0.611755000  |
| 23 | 0.356341000  | -0.585112000 | -0.591790000 |
| 5  | -0.384104000 | 0.177336000  | 1.497932000  |
| 6  | 3.241537000  | -1.516719000 | -1.115860000 |
| 1  | 3.624224000  | -0.649925000 | -1.686485000 |
| 6  | 2.107632000  | -2.161207000 | -1.894413000 |
| 1  | 2.508412000  | -2.668778000 | -2.787289000 |
| 1  | 1.573404000  | -2.933816000 | -1.313212000 |
| 1  | 1.383024000  | -1.423826000 | -2.320255000 |
| 6  | 4.394512000  | -2.461103000 | -0.850407000 |
| 1  | 4.896352000  | -2.694729000 | -1.803631000 |

|    |              |              |              |
|----|--------------|--------------|--------------|
| 1  | 5.140942000  | -2.014992000 | -0.177011000 |
| 1  | 4.061437000  | -3.419009000 | -0.423571000 |
| 6  | -2.723618000 | -0.747750000 | -2.418665000 |
| 1  | -3.007196000 | 0.300133000  | -2.213722000 |
| 6  | -3.919265000 | -1.582295000 | -2.827346000 |
| 1  | -4.329736000 | -1.202632000 | -3.777426000 |
| 1  | -3.623594000 | -2.633002000 | -2.983608000 |
| 1  | -4.730894000 | -1.568859000 | -2.086443000 |
| 6  | -1.626984000 | -0.811245000 | -3.460354000 |
| 1  | -2.024958000 | -0.514139000 | -4.444262000 |
| 1  | -0.788725000 | -0.136407000 | -3.221643000 |
| 1  | -1.236358000 | -1.839567000 | -3.564537000 |
| 6  | 1.316937000  | 2.582088000  | -2.176038000 |
| 1  | 2.225379000  | 2.681834000  | -1.555547000 |
| 6  | 1.570852000  | 1.605775000  | -3.302911000 |
| 1  | 0.653367000  | 1.406898000  | -3.882866000 |
| 1  | 2.305953000  | 2.034816000  | -4.003149000 |
| 1  | 1.977852000  | 0.646352000  | -2.944601000 |
| 6  | 0.851174000  | 3.926304000  | -2.697846000 |
| 1  | -0.066346000 | 3.809580000  | -3.297993000 |
| 1  | 0.630559000  | 4.644870000  | -1.894828000 |
| 1  | 1.625394000  | 4.367428000  | -3.347028000 |
| 16 | 2.630597000  | -0.570051000 | 0.391156000  |
| 16 | 0.037686000  | 1.886679000  | -1.006197000 |
| 16 | -2.011513000 | -1.366937000 | -0.803269000 |

[V]-N<sub>2</sub><sup>+</sup> (TE= -3318.744561)

|   |              |              |              |
|---|--------------|--------------|--------------|
| 6 | 2.070882000  | 0.785452000  | -1.346413000 |
| 6 | 2.732913000  | 1.827563000  | -2.017815000 |
| 1 | 2.133244000  | 2.613318000  | -2.491033000 |
| 6 | 4.119998000  | 1.889722000  | -2.102360000 |
| 1 | 4.599536000  | 2.712377000  | -2.639330000 |
| 6 | 4.893056000  | 0.901345000  | -1.498682000 |
| 1 | 5.983982000  | 0.933756000  | -1.560763000 |
| 6 | 4.273837000  | -0.137112000 | -0.809043000 |
| 1 | 4.885236000  | -0.912238000 | -0.339478000 |
| 6 | 2.880986000  | -0.179931000 | -0.719290000 |
| 6 | -0.219432000 | -0.530221000 | -1.928166000 |
| 6 | 0.531938000  | -1.391968000 | -2.779015000 |
| 1 | 1.567432000  | -1.116769000 | -3.003574000 |
| 6 | -0.003178000 | -2.521458000 | -3.363755000 |
| 1 | 0.606493000  | -3.133787000 | -4.032409000 |
| 6 | -1.333534000 | -2.873070000 | -3.102024000 |
| 1 | -1.770321000 | -3.762885000 | -3.562779000 |
| 6 | -2.106108000 | -2.100227000 | -2.252935000 |
| 1 | -3.138533000 | -2.391794000 | -2.060505000 |

|    |              |              |              |
|----|--------------|--------------|--------------|
| 6  | -1.563862000 | -0.948729000 | -1.652567000 |
| 6  | -0.233140000 | 2.110235000  | -1.003756000 |
| 6  | -0.695995000 | 2.986395000  | -1.993295000 |
| 1  | -0.622940000 | 2.686394000  | -3.045607000 |
| 6  | -1.259354000 | 4.219212000  | -1.666983000 |
| 1  | -1.622900000 | 4.881220000  | -2.457423000 |
| 6  | -1.356834000 | 4.605113000  | -0.333351000 |
| 1  | -1.787373000 | 5.574506000  | -0.068387000 |
| 6  | -0.902657000 | 3.756364000  | 0.676113000  |
| 1  | -0.976127000 | 4.072494000  | 1.720562000  |
| 6  | -0.364291000 | 2.518277000  | 0.333537000  |
| 23 | -0.285562000 | -0.820223000 | 0.364743000  |
| 5  | 0.493105000  | 0.755841000  | -1.368593000 |
| 6  | -4.061609000 | -0.766368000 | -0.015775000 |
| 1  | -4.360328000 | -0.039669000 | 0.764353000  |
| 6  | -3.915604000 | -2.123003000 | 0.636449000  |
| 1  | -3.317192000 | -2.070310000 | 1.557902000  |
| 1  | -4.916086000 | -2.487792000 | 0.920609000  |
| 1  | -3.469985000 | -2.881962000 | -0.024915000 |
| 6  | -5.086103000 | -0.695645000 | -1.132228000 |
| 1  | -6.074471000 | -0.970414000 | -0.729866000 |
| 1  | -5.160519000 | 0.319591000  | -1.548997000 |
| 1  | -4.869407000 | -1.387270000 | -1.960193000 |
| 6  | 3.048787000  | -1.398776000 | 1.863378000  |
| 1  | 3.513190000  | -0.398121000 | 1.820070000  |
| 6  | 4.092548000  | -2.494603000 | 1.923793000  |
| 1  | 4.673560000  | -2.404185000 | 2.856274000  |
| 1  | 3.613299000  | -3.487616000 | 1.920864000  |
| 1  | 4.799548000  | -2.462813000 | 1.082184000  |
| 6  | 2.093895000  | -1.476288000 | 3.033119000  |
| 1  | 2.672127000  | -1.434005000 | 3.970635000  |
| 1  | 1.381695000  | -0.637710000 | 3.048612000  |
| 1  | 1.536665000  | -2.428221000 | 3.044825000  |
| 6  | -1.107187000 | 1.545189000  | 2.936936000  |
| 1  | -1.932569000 | 2.079380000  | 2.433771000  |
| 6  | -1.591229000 | 0.190791000  | 3.408664000  |
| 1  | -0.767411000 | -0.426781000 | 3.807074000  |
| 1  | -2.317532000 | 0.325695000  | 4.226894000  |
| 1  | -2.093472000 | -0.371030000 | 2.604165000  |
| 6  | -0.525553000 | 2.372405000  | 4.064138000  |
| 1  | 0.323351000  | 1.847598000  | 4.534267000  |
| 1  | -0.162401000 | 3.353792000  | 3.723624000  |
| 1  | -1.288901000 | 2.540887000  | 4.841462000  |
| 7  | -0.883754000 | -3.525633000 | 1.904391000  |
| 7  | -0.732366000 | -2.550794000 | 1.388527000  |
| 16 | -2.479646000 | 0.085592000  | -0.501513000 |

|    |             |              |             |
|----|-------------|--------------|-------------|
| 16 | 2.127693000 | -1.524778000 | 0.226004000 |
| 16 | 0.182911000 | 1.343016000  | 1.594165000 |

[V]-NH<sub>3</sub><sup>+</sup>(TE= -3318.744561)

|    |              |              |              |
|----|--------------|--------------|--------------|
| 6  | -0.107722000 | 1.697876000  | 1.130168000  |
| 6  | 0.498385000  | 2.315258000  | 2.252103000  |
| 1  | 1.069433000  | 1.676141000  | 2.940140000  |
| 6  | 0.391847000  | 3.674449000  | 2.532136000  |
| 1  | 0.877523000  | 4.087645000  | 3.424846000  |
| 6  | -0.346203000 | 4.514813000  | 1.692131000  |
| 1  | -0.439855000 | 5.584855000  | 1.905970000  |
| 6  | -0.928471000 | 3.966877000  | 0.549328000  |
| 1  | -1.457229000 | 4.609342000  | -0.165990000 |
| 6  | -0.793667000 | 2.602860000  | 0.275121000  |
| 6  | -1.294389000 | -0.683005000 | 1.399258000  |
| 6  | -1.963135000 | -0.317837000 | 2.592650000  |
| 1  | -1.577282000 | 0.548494000  | 3.148088000  |
| 6  | -3.064382000 | -1.002935000 | 3.099124000  |
| 1  | -3.531589000 | -0.670591000 | 4.034338000  |
| 6  | -3.568964000 | -2.121157000 | 2.428969000  |
| 1  | -4.433675000 | -2.669114000 | 2.818301000  |
| 6  | -2.968556000 | -2.505654000 | 1.229729000  |
| 1  | -3.375890000 | -3.343006000 | 0.649350000  |
| 6  | -1.874984000 | -1.793279000 | 0.727821000  |
| 6  | 1.379014000  | -0.541978000 | 1.292196000  |
| 6  | 1.537587000  | -1.209498000 | 2.532986000  |
| 1  | 0.673030000  | -1.234230000 | 3.210859000  |
| 6  | 2.718918000  | -1.826622000 | 2.933357000  |
| 1  | 2.772909000  | -2.319716000 | 3.911908000  |
| 6  | 3.837863000  | -1.816421000 | 2.096035000  |
| 1  | 4.770472000  | -2.308304000 | 2.392216000  |
| 6  | 3.729419000  | -1.198771000 | 0.849469000  |
| 1  | 4.566944000  | -1.239824000 | 0.143435000  |
| 6  | 2.534793000  | -0.580782000 | 0.461672000  |
| 16 | 2.375612000  | -0.113176000 | -1.281172000 |
| 16 | -1.251359000 | 2.039527000  | -1.377403000 |
| 16 | -1.371966000 | -2.135755000 | -0.973654000 |
| 23 | -0.074787000 | -0.116743000 | -1.433965000 |
| 6  | -3.138673000 | 1.927592000  | -1.355295000 |
| 1  | -3.485521000 | 2.975860000  | -1.430393000 |
| 6  | -0.368531000 | -3.742613000 | -0.862307000 |
| 1  | -1.123089000 | -4.539450000 | -0.719703000 |
| 6  | 3.267206000  | 1.550043000  | -1.424474000 |
| 1  | 3.031466000  | 1.791644000  | -2.479858000 |
| 6  | 4.760574000  | 1.375229000  | -1.256160000 |
| 1  | 5.294014000  | 2.317361000  | -1.478887000 |

|   |              |              |              |
|---|--------------|--------------|--------------|
| 1 | 4.999979000  | 1.100990000  | -0.213963000 |
| 1 | 5.159407000  | 0.587033000  | -1.916028000 |
| 6 | 2.700495000  | 2.611314000  | -0.516480000 |
| 1 | 2.850342000  | 2.340811000  | 0.543195000  |
| 1 | 3.197598000  | 3.582165000  | -0.694547000 |
| 1 | 1.617343000  | 2.735094000  | -0.670022000 |
| 6 | -3.499489000 | 1.156060000  | -2.605417000 |
| 1 | -3.133199000 | 1.654405000  | -3.520460000 |
| 1 | -3.032307000 | 0.152830000  | -2.544508000 |
| 1 | -4.591962000 | 1.028984000  | -2.697674000 |
| 6 | -3.677821000 | 1.273535000  | -0.109533000 |
| 1 | -3.374788000 | 1.810546000  | 0.803096000  |
| 1 | -4.781763000 | 1.236615000  | -0.141641000 |
| 1 | -3.295547000 | 0.241735000  | -0.026099000 |
| 6 | 0.303915000  | -3.870344000 | -2.210499000 |
| 1 | 0.933165000  | -4.775553000 | -2.262801000 |
| 1 | -0.426532000 | -3.909810000 | -3.038083000 |
| 1 | 0.951644000  | -2.982322000 | -2.360825000 |
| 6 | 0.629487000  | -3.730105000 | 0.265060000  |
| 1 | 1.334448000  | -2.891783000 | 0.129482000  |
| 1 | 0.146195000  | -3.599786000 | 1.246145000  |
| 1 | 1.206258000  | -4.672582000 | 0.283230000  |
| 5 | -0.012716000 | 0.121801000  | 0.854483000  |
| 7 | -0.175615000 | -0.368387000 | -3.723011000 |
| 1 | -0.451577000 | 0.485841000  | -4.210757000 |
| 1 | 0.720128000  | -0.651047000 | -4.124615000 |
| 1 | -0.851190000 | -1.085444000 | -3.997120000 |

[V]-(TE= -3318.744561)

|   |              |              |              |
|---|--------------|--------------|--------------|
| 6 | 0.129041000  | -1.676503000 | 1.045052000  |
| 6 | -0.404568000 | -2.253175000 | 2.218600000  |
| 1 | -0.927085000 | -1.592873000 | 2.924506000  |
| 6 | -0.290031000 | -3.608173000 | 2.521895000  |
| 1 | -0.717619000 | -3.998679000 | 3.452977000  |
| 6 | 0.374722000  | -4.470555000 | 1.647036000  |
| 1 | 0.472501000  | -5.536872000 | 1.876773000  |
| 6 | 0.886333000  | -3.956158000 | 0.456998000  |
| 1 | 1.362799000  | -4.619877000 | -0.274798000 |
| 6 | 0.754396000  | -2.594394000 | 0.166350000  |
| 6 | 1.320642000  | 0.716356000  | 1.246620000  |
| 6 | 1.993817000  | 0.374969000  | 2.441016000  |
| 1 | 1.607074000  | -0.472699000 | 3.023161000  |
| 6 | 3.112207000  | 1.057831000  | 2.913617000  |
| 1 | 3.586066000  | 0.747587000  | 3.852499000  |
| 6 | 3.626019000  | 2.141883000  | 2.199155000  |
| 1 | 4.503038000  | 2.689250000  | 2.560558000  |



|    |              |              |              |
|----|--------------|--------------|--------------|
| 6  | 3.019355000  | 2.498065000  | 0.995585000  |
| 1  | 3.435084000  | 3.308983000  | 0.385048000  |
| 6  | 1.902960000  | 1.794491000  | 0.529059000  |
| 6  | -1.366177000 | 0.580103000  | 1.152074000  |
| 6  | -1.513152000 | 1.259961000  | 2.383678000  |
| 1  | -0.647841000 | 1.281342000  | 3.060021000  |
| 6  | -2.686869000 | 1.897621000  | 2.776367000  |
| 1  | -2.738209000 | 2.397616000  | 3.750906000  |
| 6  | -3.797315000 | 1.901749000  | 1.930098000  |
| 1  | -4.724715000 | 2.407319000  | 2.219132000  |
| 6  | -3.695169000 | 1.274613000  | 0.689635000  |
| 1  | -4.529900000 | 1.322380000  | -0.018724000 |
| 6  | -2.512120000 | 0.625358000  | 0.311317000  |
| 16 | -2.386527000 | 0.115687000  | -1.418856000 |
| 16 | 1.155712000  | -2.058422000 | -1.508347000 |
| 16 | 1.391242000  | 2.115105000  | -1.172525000 |
| 23 | 0.058183000  | 0.123782000  | -1.495963000 |
| 6  | 3.046384000  | -2.015612000 | -1.527816000 |
| 1  | 3.352076000  | -3.079032000 | -1.532997000 |
| 6  | 0.442502000  | 3.761062000  | -1.054424000 |
| 1  | 1.218170000  | 4.512170000  | -0.813878000 |
| 6  | -3.296416000 | -1.547706000 | -1.494742000 |
| 1  | -3.067532000 | -1.827760000 | -2.541450000 |
| 6  | -4.786335000 | -1.350408000 | -1.324884000 |
| 1  | -5.329989000 | -2.292726000 | -1.519891000 |
| 1  | -5.020783000 | -1.045597000 | -0.290055000 |
| 1  | -5.179715000 | -0.578111000 | -2.006131000 |
| 6  | -2.730033000 | -2.575523000 | -0.550338000 |
| 1  | -2.873558000 | -2.264473000 | 0.499314000  |
| 1  | -3.230274000 | -3.550974000 | -0.688873000 |
| 1  | -1.649005000 | -2.708134000 | -0.707647000 |
| 6  | 3.404614000  | -1.346753000 | -2.835758000 |
| 1  | 3.015458000  | -1.901387000 | -3.706174000 |
| 1  | 2.959498000  | -0.332112000 | -2.849968000 |
| 1  | 4.497900000  | -1.247419000 | -2.946713000 |
| 6  | 3.625691000  | -1.294255000 | -0.338443000 |
| 1  | 3.326497000  | -1.759532000 | 0.614102000  |
| 1  | 4.729098000  | -1.288102000 | -0.392180000 |
| 1  | 3.270308000  | -0.249392000 | -0.321615000 |
| 6  | -0.117717000 | 3.977795000  | -2.441000000 |
| 1  | -0.726371000 | 4.897024000  | -2.488152000 |
| 1  | 0.674065000  | 4.043129000  | -3.206120000 |
| 1  | -0.769415000 | 3.117994000  | -2.697394000 |
| 6  | -0.635447000 | 3.725849000  | -0.005254000 |
| 1  | -1.344820000 | 2.910112000  | -0.233240000 |
| 1  | -0.230594000 | 3.537898000  | 1.001703000  |

|   |              |              |             |
|---|--------------|--------------|-------------|
| 1 | -1.193377000 | 4.679459000  | 0.015097000 |
| 5 | 0.028427000  | -0.100469000 | 0.738810000 |

[V]-N<sub>2</sub><sup>+</sup>(TE= -3318.940864)

|    |              |              |              |
|----|--------------|--------------|--------------|
| 6  | 0.764441000  | -0.656022000 | -1.991020000 |
| 6  | 1.547983000  | -0.369325000 | -3.124080000 |
| 1  | 1.536927000  | 0.658098000  | -3.511437000 |
| 6  | 2.323887000  | -1.335536000 | -3.762877000 |
| 1  | 2.921068000  | -1.067003000 | -4.641703000 |
| 6  | 2.325355000  | -2.650747000 | -3.296299000 |
| 1  | 2.918382000  | -3.421643000 | -3.799570000 |
| 6  | 1.571836000  | -2.979526000 | -2.167287000 |
| 1  | 1.579265000  | -4.009569000 | -1.794754000 |
| 6  | 0.847119000  | -1.982542000 | -1.513957000 |
| 6  | -1.736131000 | 0.168321000  | -1.505155000 |
| 6  | -2.250683000 | -0.469842000 | -2.657608000 |
| 1  | -1.535174000 | -0.911846000 | -3.363319000 |
| 6  | -3.609840000 | -0.528245000 | -2.945769000 |
| 1  | -3.952796000 | -1.032738000 | -3.856513000 |
| 6  | -4.536125000 | 0.095279000  | -2.104295000 |
| 1  | -5.604285000 | 0.095501000  | -2.344408000 |
| 6  | -4.077536000 | 0.713254000  | -0.941160000 |
| 1  | -4.785857000 | 1.211483000  | -0.272212000 |
| 6  | -2.719739000 | 0.670613000  | -0.616787000 |
| 6  | 0.313476000  | 1.882931000  | -1.154807000 |
| 6  | -0.393170000 | 3.006924000  | -1.636462000 |
| 1  | -1.354717000 | 2.835960000  | -2.138147000 |
| 6  | 0.079715000  | 4.311421000  | -1.505301000 |
| 1  | -0.513468000 | 5.147384000  | -1.893754000 |
| 6  | 1.312023000  | 4.554856000  | -0.900782000 |
| 1  | 1.696275000  | 5.574696000  | -0.795928000 |
| 6  | 2.051778000  | 3.475919000  | -0.402495000 |
| 1  | 3.008200000  | 3.670946000  | 0.091651000  |
| 6  | 1.539149000  | 2.185115000  | -0.498930000 |
| 23 | 0.060408000  | 0.020773000  | 1.133479000  |
| 5  | -0.186784000 | 0.380383000  | -1.242610000 |
| 6  | -3.164809000 | 0.351154000  | 2.231263000  |
| 1  | -2.549670000 | 0.538446000  | 3.130813000  |
| 6  | -3.211050000 | -1.136594000 | 1.963465000  |
| 1  | -3.793274000 | -1.647178000 | 2.750483000  |
| 1  | -3.685883000 | -1.354163000 | 0.990702000  |
| 1  | -2.195914000 | -1.568305000 | 1.943667000  |
| 6  | -4.538166000 | 0.953845000  | 2.455921000  |
| 1  | -4.971689000 | 0.558153000  | 3.391432000  |
| 1  | -4.495029000 | 2.051461000  | 2.537350000  |
| 1  | -5.236267000 | 0.693271000  | 1.643915000  |

|    |              |              |              |
|----|--------------|--------------|--------------|
| 6  | 0.989586000  | -3.554788000 | 0.865210000  |
| 1  | 1.977118000  | -3.486265000 | 0.373934000  |
| 6  | 0.384693000  | -4.931468000 | 0.676533000  |
| 1  | 0.998479000  | -5.706887000 | 1.169372000  |
| 1  | -0.625180000 | -4.968291000 | 1.121199000  |
| 1  | 0.283329000  | -5.199534000 | -0.387355000 |
| 6  | 1.124074000  | -3.182551000 | 2.326259000  |
| 1  | 1.720261000  | -3.938289000 | 2.867155000  |
| 1  | 1.607892000  | -2.198146000 | 2.440970000  |
| 1  | 0.135038000  | -3.119628000 | 2.816784000  |
| 6  | 3.426441000  | 1.440857000  | 1.543732000  |
| 1  | 2.910439000  | 2.342292000  | 1.923171000  |
| 6  | 3.554719000  | 0.411578000  | 2.649568000  |
| 1  | 3.929920000  | -0.546879000 | 2.245804000  |
| 1  | 4.276766000  | 0.754739000  | 3.410453000  |
| 1  | 2.592875000  | 0.218983000  | 3.147666000  |
| 6  | 4.785124000  | 1.785056000  | 0.961017000  |
| 1  | 5.279345000  | 0.868841000  | 0.594271000  |
| 1  | 4.720176000  | 2.481446000  | 0.111087000  |
| 1  | 5.438320000  | 2.238696000  | 1.727780000  |
| 7  | 0.049851000  | 0.041458000  | 4.221108000  |
| 7  | 0.082806000  | 0.031088000  | 3.072904000  |
| 16 | -2.132266000 | 1.277870000  | 0.977776000  |
| 16 | -0.056203000 | -2.257976000 | 0.020781000  |
| 16 | 2.323479000  | 0.728157000  | 0.236881000  |

Cartesian coordinates of the species involved during the conversion of  $[2c'_{PB} -V-H]^+ \rightarrow [2c'_{PB} -V-H-B]$  along with their total energies (in hartree) including zero point vibrational correction at M06-D3(heptane)/def2-SVP level of theory.

$[2c'_{PB} -V-H]$  (TE= -3049.461825)

|   |              |              |              |
|---|--------------|--------------|--------------|
| 6 | 1.164807000  | 2.261958000  | 1.918024000  |
| 6 | 0.998759000  | 1.041255000  | 2.823699000  |
| 6 | -2.425736000 | 1.353107000  | 1.778249000  |
| 6 | -1.692529000 | 0.495497000  | 2.807903000  |
| 6 | 1.315014000  | -2.068534000 | 1.822473000  |
| 6 | 0.092453000  | -1.536637000 | 2.564361000  |
| 1 | -1.888403000 | 2.291003000  | 1.591875000  |
| 1 | -1.677020000 | 1.053932000  | 3.758885000  |
| 1 | 1.603543000  | -3.077652000 | 2.138838000  |
| 1 | 0.213027000  | -1.764162000 | 3.640664000  |
| 1 | 1.851844000  | 3.013819000  | 2.329938000  |
| 1 | 1.967565000  | 0.521591000  | 2.897714000  |
| 6 | 1.949931000  | 3.283443000  | -0.744495000 |
| 1 | 2.987651000  | 3.604481000  | -0.570172000 |
| 6 | -3.637053000 | -0.934215000 | 0.445563000  |

|    |              |              |              |
|----|--------------|--------------|--------------|
| 1  | -2.949443000 | -1.656823000 | 0.912909000  |
| 6  | 2.763339000  | -2.254443000 | -0.677896000 |
| 1  | 3.336220000  | -1.427515000 | -0.238114000 |
| 23 | -0.108017000 | 0.229925000  | -0.525750000 |
| 1  | 0.204135000  | 2.765601000  | 1.766957000  |
| 1  | 0.809126000  | 1.404655000  | 3.848717000  |
| 1  | -0.796814000 | -2.117814000 | 2.269010000  |
| 1  | 2.189099000  | -1.430791000 | 2.015323000  |
| 1  | -2.311092000 | -0.391699000 | 3.018818000  |
| 1  | -3.436947000 | 1.632294000  | 2.108133000  |
| 6  | 3.423586000  | -3.560522000 | -0.256775000 |
| 1  | 4.464015000  | -3.592809000 | -0.599471000 |
| 1  | 3.436759000  | -3.695252000 | 0.828821000  |
| 1  | 2.923173000  | -4.431117000 | -0.693881000 |
| 6  | 2.775105000  | -2.084417000 | -2.191247000 |
| 1  | 2.159083000  | -2.840219000 | -2.693600000 |
| 1  | 2.394595000  | -1.105593000 | -2.497369000 |
| 1  | 3.790339000  | -2.187032000 | -2.590206000 |
| 6  | -4.798634000 | -0.739952000 | 1.412678000  |
| 1  | -5.292270000 | -1.700691000 | 1.602082000  |
| 1  | -4.477555000 | -0.351341000 | 2.382545000  |
| 1  | -5.563012000 | -0.064745000 | 1.022420000  |
| 6  | -4.107381000 | -1.526072000 | -0.878828000 |
| 1  | -4.888003000 | -0.909353000 | -1.336123000 |
| 1  | -3.295953000 | -1.615418000 | -1.608103000 |
| 1  | -4.533311000 | -2.525916000 | -0.737871000 |
| 6  | 1.767823000  | 3.004420000  | -2.232808000 |
| 1  | 2.389102000  | 2.177420000  | -2.591792000 |
| 1  | 0.725972000  | 2.742366000  | -2.444411000 |
| 1  | 2.018679000  | 3.889370000  | -2.828786000 |
| 6  | 1.024220000  | 4.405233000  | -0.295083000 |
| 1  | 1.220848000  | 4.729650000  | 0.730421000  |
| 1  | 1.144285000  | 5.280134000  | -0.944004000 |
| 1  | -0.023874000 | 4.092476000  | -0.355799000 |
| 6  | 0.223320000  | -3.631832000 | -0.468387000 |
| 1  | 0.820924000  | -3.988151000 | -1.320386000 |
| 6  | -1.198229000 | -3.417106000 | -0.962752000 |
| 1  | -1.845310000 | -3.050018000 | -0.159949000 |
| 1  | -1.246298000 | -2.685603000 | -1.774201000 |
| 1  | -1.634067000 | -4.353719000 | -1.329136000 |
| 6  | 0.260977000  | -4.698247000 | 0.617684000  |
| 1  | -0.191947000 | -5.627269000 | 0.253269000  |
| 1  | 1.274299000  | -4.939986000 | 0.947607000  |
| 1  | -0.307683000 | -4.392556000 | 1.502674000  |
| 6  | -3.401958000 | 1.784149000  | -0.879887000 |
| 1  | -2.844911000 | 2.692518000  | -0.605711000 |

|    |              |              |              |
|----|--------------|--------------|--------------|
| 6  | -4.866689000 | 2.002821000  | -0.527256000 |
| 1  | -5.497366000 | 1.167060000  | -0.846180000 |
| 1  | -5.030158000 | 2.152160000  | 0.543760000  |
| 1  | -5.248463000 | 2.894007000  | -1.038881000 |
| 6  | -3.209667000 | 1.578554000  | -2.376118000 |
| 1  | -3.629210000 | 0.629727000  | -2.726682000 |
| 1  | -3.705236000 | 2.376047000  | -2.941516000 |
| 1  | -2.150561000 | 1.593317000  | -2.642752000 |
| 6  | 3.501204000  | 1.216651000  | 0.578052000  |
| 1  | 3.420926000  | 0.229764000  | 1.057729000  |
| 6  | 4.258134000  | 2.136443000  | 1.526100000  |
| 1  | 5.308072000  | 1.831443000  | 1.605388000  |
| 1  | 4.257454000  | 3.176411000  | 1.178758000  |
| 1  | 3.842590000  | 2.127815000  | 2.536866000  |
| 6  | 4.256436000  | 1.047867000  | -0.735709000 |
| 1  | 5.223725000  | 0.558676000  | -0.574376000 |
| 1  | 3.703468000  | 0.450772000  | -1.467012000 |
| 1  | 4.466353000  | 2.016254000  | -1.203047000 |
| 15 | -2.485077000 | 0.513301000  | 0.141284000  |
| 15 | 1.718209000  | 1.710528000  | 0.248423000  |
| 15 | 1.043161000  | -1.997008000 | -0.000132000 |
| 5  | -0.194112000 | 0.031753000  | 2.463666000  |
| 7  | -0.191232000 | -0.330416000 | -3.626919000 |
| 7  | -0.153829000 | -0.082811000 | -2.524400000 |
| 1  | -0.579396000 | 1.915184000  | -0.546321000 |

$[2c'_{PB} - V-H-B]$  (TE= -3049.490923)

|    |              |              |              |
|----|--------------|--------------|--------------|
| 6  | 0.520070000  | 2.300227000  | -2.012901000 |
| 6  | -0.256663000 | 1.291854000  | -2.866128000 |
| 6  | 2.417559000  | -0.708742000 | -2.029357000 |
| 6  | 1.162840000  | -1.099896000 | -2.814507000 |
| 6  | -2.705904000 | -0.649530000 | -1.752837000 |
| 6  | -1.579665000 | -1.074619000 | -2.699440000 |
| 1  | 2.658118000  | 0.351299000  | -2.186365000 |
| 1  | 1.396537000  | -1.000121000 | -3.887306000 |
| 1  | -3.674807000 | -1.098504000 | -2.007917000 |
| 1  | -1.932348000 | -0.918273000 | -3.732321000 |
| 1  | 0.441410000  | 3.329230000  | -2.391471000 |
| 1  | -1.307412000 | 1.627771000  | -2.907035000 |
| 6  | 1.021885000  | 3.565968000  | 0.629587000  |
| 1  | 0.403271000  | 4.474818000  | 0.652534000  |
| 6  | 2.574231000  | -2.748681000 | 0.038638000  |
| 1  | 1.808410000  | -3.170432000 | -0.632363000 |
| 6  | -3.784319000 | -0.189286000 | 0.905823000  |
| 1  | -3.723624000 | 0.858247000  | 0.570901000  |
| 23 | -0.014744000 | -0.129681000 | 0.582113000  |

|   |              |              |              |
|---|--------------|--------------|--------------|
| 1 | 1.591965000  | 2.069454000  | -2.017567000 |
| 1 | 0.095025000  | 1.397166000  | -3.905584000 |
| 1 | -1.436513000 | -2.163942000 | -2.615431000 |
| 1 | -2.860553000 | 0.438177000  | -1.815278000 |
| 1 | 0.992581000  | -2.181034000 | -2.672184000 |
| 1 | 3.310966000  | -1.256057000 | -2.361468000 |
| 6 | -5.160344000 | -0.729515000 | 0.542982000  |
| 1 | -5.945944000 | -0.126974000 | 1.013097000  |
| 1 | -5.349688000 | -0.723477000 | -0.534106000 |
| 1 | -5.296146000 | -1.755650000 | 0.900920000  |
| 6 | -3.567115000 | -0.215108000 | 2.413510000  |
| 1 | -3.559345000 | -1.239615000 | 2.804538000  |
| 1 | -2.618726000 | 0.246542000  | 2.701309000  |
| 1 | -4.369847000 | 0.316815000  | 2.935932000  |
| 6 | 3.933821000  | -3.272322000 | -0.403824000 |
| 1 | 3.931645000  | -4.368022000 | -0.430325000 |
| 1 | 4.226888000  | -2.927304000 | -1.399264000 |
| 1 | 4.722258000  | -2.978474000 | 0.296616000  |
| 6 | 2.249363000  | -3.215842000 | 1.453641000  |
| 1 | 3.023971000  | -2.922594000 | 2.168301000  |
| 1 | 1.302462000  | -2.808166000 | 1.816728000  |
| 1 | 2.177299000  | -4.308468000 | 1.493061000  |
| 6 | 1.295662000  | 3.135090000  | 2.067228000  |
| 1 | 0.379998000  | 2.886480000  | 2.613082000  |
| 1 | 1.930898000  | 2.241099000  | 2.095967000  |
| 1 | 1.811587000  | 3.925285000  | 2.624453000  |
| 6 | 2.318152000  | 3.902979000  | -0.093787000 |
| 1 | 2.150052000  | 4.320877000  | -1.089532000 |
| 1 | 2.895540000  | 4.637492000  | 0.478374000  |
| 1 | 2.959889000  | 3.022330000  | -0.214348000 |
| 6 | -2.655116000 | -2.828612000 | 0.241756000  |
| 1 | -3.144643000 | -2.906456000 | 1.225167000  |
| 6 | -1.335829000 | -3.588594000 | 0.314561000  |
| 1 | -0.754206000 | -3.469387000 | -0.608339000 |
| 1 | -0.706971000 | -3.230975000 | 1.133768000  |
| 1 | -1.507149000 | -4.661515000 | 0.460650000  |
| 6 | -3.570491000 | -3.450349000 | -0.806371000 |
| 1 | -3.765432000 | -4.501141000 | -0.563409000 |
| 1 | -4.538682000 | -2.952317000 | -0.888930000 |
| 1 | -3.108916000 | -3.433223000 | -1.798713000 |
| 6 | 3.736151000  | 0.033026000  | 0.449636000  |
| 1 | 3.359289000  | 1.064824000  | 0.369912000  |
| 6 | 5.027447000  | -0.039999000 | -0.356226000 |
| 1 | 5.494717000  | -1.026396000 | -0.309537000 |
| 1 | 4.880673000  | 0.204484000  | -1.411176000 |
| 1 | 5.757295000  | 0.675396000  | 0.040615000  |

|    |              |              |              |
|----|--------------|--------------|--------------|
| 6  | 3.980820000  | -0.244732000 | 1.927172000  |
| 1  | 4.445585000  | -1.224305000 | 2.079566000  |
| 1  | 4.662619000  | 0.498137000  | 2.355596000  |
| 1  | 3.057799000  | -0.222650000 | 2.516067000  |
| 6  | -1.698362000 | 3.028678000  | -0.273642000 |
| 1  | -2.324227000 | 2.251890000  | -0.738203000 |
| 6  | -1.810164000 | 4.294134000  | -1.110576000 |
| 1  | -2.821818000 | 4.711153000  | -1.050035000 |
| 1  | -1.125529000 | 5.078507000  | -0.767247000 |
| 1  | -1.599320000 | 4.112704000  | -2.167624000 |
| 6  | -2.193784000 | 3.245229000  | 1.151020000  |
| 1  | -3.252339000 | 3.527721000  | 1.163199000  |
| 1  | -2.083260000 | 2.344135000  | 1.765451000  |
| 1  | -1.645831000 | 4.051952000  | 1.651404000  |
| 15 | 2.259882000  | -0.918906000 | -0.194631000 |
| 15 | 0.002833000  | 2.249976000  | -0.240832000 |
| 15 | -2.338681000 | -0.984515000 | 0.031302000  |
| 5  | -0.187626000 | -0.282285000 | -2.429677000 |
| 7  | 0.146730000  | -0.502512000 | 3.683295000  |
| 7  | 0.084150000  | -0.363234000 | 2.556397000  |
| 1  | -0.136379000 | -0.280680000 | -1.175520000 |

TS (TE= -3049.463264)

|    |              |              |              |
|----|--------------|--------------|--------------|
| 6  | -0.689443000 | 2.932404000  | 1.693873000  |
| 6  | 0.119930000  | 2.059082000  | 2.647803000  |
| 6  | -1.679344000 | -1.601885000 | 2.423870000  |
| 6  | -1.390185000 | -0.238530000 | 3.056450000  |
| 6  | 2.488328000  | -0.136555000 | 1.841265000  |
| 6  | 1.272266000  | -0.397072000 | 2.724909000  |
| 1  | -2.589686000 | -2.063845000 | 2.829938000  |
| 1  | -2.272519000 | 0.409636000  | 2.948800000  |
| 1  | 3.385393000  | -0.671914000 | 2.182975000  |
| 1  | 1.566028000  | -0.173131000 | 3.768825000  |
| 1  | -0.628233000 | 4.004248000  | 1.926909000  |
| 1  | 1.183372000  | 2.340745000  | 2.576164000  |
| 6  | -1.376782000 | 3.619990000  | -1.079443000 |
| 1  | -0.974814000 | 4.643915000  | -1.108113000 |
| 6  | -1.738001000 | -3.390554000 | 0.140059000  |
| 1  | -0.656453000 | -3.583696000 | 0.208330000  |
| 6  | 3.506204000  | 0.408698000  | -0.801124000 |
| 1  | 3.242021000  | 1.459717000  | -0.620970000 |
| 23 | -0.239192000 | 0.127452000  | -0.343281000 |
| 1  | -1.746728000 | 2.654784000  | 1.754279000  |
| 1  | -0.162703000 | 2.331794000  | 3.679949000  |
| 1  | 1.063384000  | -1.473116000 | 2.735606000  |
| 1  | 2.751527000  | 0.931718000  | 1.859029000  |

|   |              |              |              |
|---|--------------|--------------|--------------|
| 1 | -1.286694000 | -0.398272000 | 4.145429000  |
| 1 | -0.869130000 | -2.306750000 | 2.655345000  |
| 6 | 4.895490000  | 0.171665000  | -0.224046000 |
| 1 | 5.637644000  | 0.783983000  | -0.748832000 |
| 1 | 4.959763000  | 0.425690000  | 0.837083000  |
| 1 | 5.216934000  | -0.869563000 | -0.333727000 |
| 6 | 3.482470000  | 0.173204000  | -2.305434000 |
| 1 | 3.846096000  | -0.827880000 | -2.561237000 |
| 1 | 2.477656000  | 0.278007000  | -2.728578000 |
| 1 | 4.134615000  | 0.886477000  | -2.821587000 |
| 6 | -2.420729000 | -4.383229000 | 1.074092000  |
| 1 | -2.148783000 | -5.407992000 | 0.793981000  |
| 1 | -2.126476000 | -4.250187000 | 2.118427000  |
| 1 | -3.510133000 | -4.323911000 | 1.029049000  |
| 6 | -2.142371000 | -3.614760000 | -1.312010000 |
| 1 | -3.224182000 | -3.514501000 | -1.449653000 |
| 1 | -1.660046000 | -2.906292000 | -1.993581000 |
| 1 | -1.873973000 | -4.624142000 | -1.643415000 |
| 6 | -1.461112000 | 3.083831000  | -2.504989000 |
| 1 | -0.484670000 | 2.934299000  | -2.973307000 |
| 1 | -1.972524000 | 2.116167000  | -2.521804000 |
| 1 | -2.033737000 | 3.767138000  | -3.142167000 |
| 6 | -2.769874000 | 3.664270000  | -0.463626000 |
| 1 | -2.798857000 | 4.203742000  | 0.485952000  |
| 1 | -3.471557000 | 4.159556000  | -1.143893000 |
| 1 | -3.155634000 | 2.652919000  | -0.283623000 |
| 6 | 2.601972000  | -2.304699000 | -0.197080000 |
| 1 | 3.691904000  | -2.328691000 | -0.342329000 |
| 6 | 1.925926000  | -2.845482000 | -1.454026000 |
| 1 | 0.837252000  | -2.865476000 | -1.332979000 |
| 1 | 2.130509000  | -2.248144000 | -2.346041000 |
| 1 | 2.253871000  | -3.870649000 | -1.660461000 |
| 6 | 2.263266000  | -3.182372000 | 0.999543000  |
| 1 | 2.525565000  | -4.226345000 | 0.794732000  |
| 1 | 2.789054000  | -2.884220000 | 1.910352000  |
| 1 | 1.189358000  | -3.159760000 | 1.218940000  |
| 6 | -3.560742000 | -0.973934000 | 0.324643000  |
| 1 | -3.571419000 | -0.093393000 | 0.986117000  |
| 6 | -4.663443000 | -1.920960000 | 0.775984000  |
| 1 | -4.773071000 | -2.771986000 | 0.096107000  |
| 1 | -4.503637000 | -2.318365000 | 1.782320000  |
| 1 | -5.629133000 | -1.402250000 | 0.784689000  |
| 6 | -3.812096000 | -0.478971000 | -1.094596000 |
| 1 | -3.761811000 | -1.287895000 | -1.830816000 |
| 1 | -4.809424000 | -0.031403000 | -1.176501000 |
| 1 | -3.081597000 | 0.278426000  | -1.393204000 |



|    |              |              |              |
|----|--------------|--------------|--------------|
| 6  | 1.419397000  | 3.556968000  | -0.206123000 |
| 1  | 2.127155000  | 2.943560000  | 0.373592000  |
| 6  | 1.421317000  | 4.957313000  | 0.389861000  |
| 1  | 2.380054000  | 5.454951000  | 0.203251000  |
| 1  | 0.646332000  | 5.595331000  | -0.049576000 |
| 1  | 1.268237000  | 4.951981000  | 1.471665000  |
| 6  | 1.882226000  | 3.572740000  | -1.658461000 |
| 1  | 2.925867000  | 3.897734000  | -1.739501000 |
| 1  | 1.804481000  | 2.587194000  | -2.131748000 |
| 1  | 1.285978000  | 4.270298000  | -2.257090000 |
| 15 | -1.798318000 | -1.566241000 | 0.576097000  |
| 15 | -0.184043000 | 2.600066000  | -0.049516000 |
| 15 | 2.128403000  | -0.508462000 | 0.069291000  |
| 5  | -0.063289000 | 0.469819000  | 2.509634000  |
| 7  | -0.631116000 | -0.396586000 | -3.418857000 |
| 7  | -0.505818000 | -0.181901000 | -2.310959000 |
| 1  | -1.332262000 | 0.669871000  | 0.857331000  |
